# Supplementary material
Source: PubMed Central journal article supplement (PMC2816018)

**Supplementary Data S3: CID spectra for single peptide hits.**

Screen shots generated in Bioworks Browser (v 3.2) for 252 peptides which correspond to 575 proteins identified by single peptide hits. The screen displays contain the following information for each peptide: precursor ion mass, charge, charge state for that spectrum, amino acid sequence, B and Y ion series and CID spectrum. The peptide sequence and corresponding protein identifiers (IPI numbers) are shown at the top of each page.

# APNVLASEPEIPKG

## IPI00269076.2, IPI00648318.1

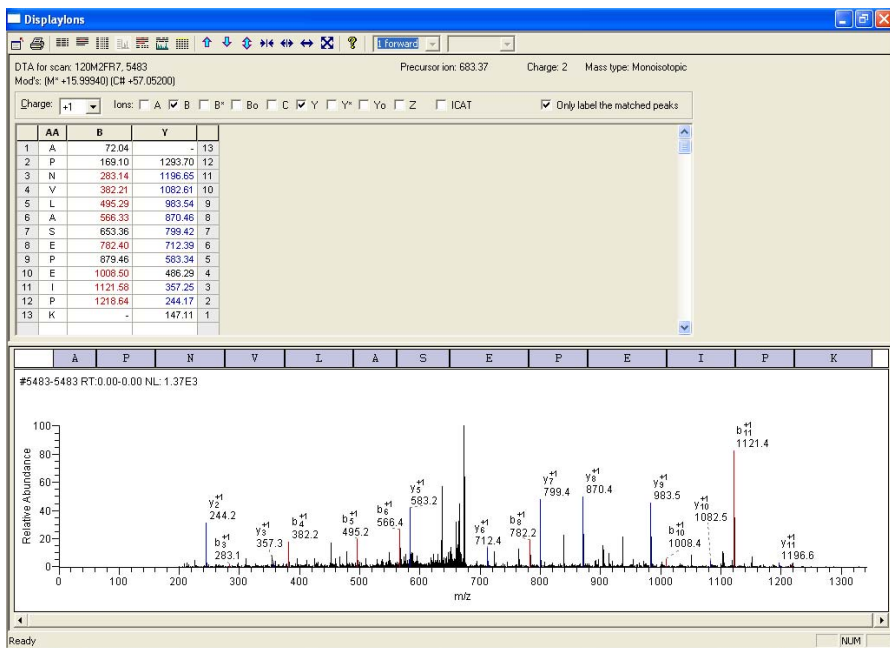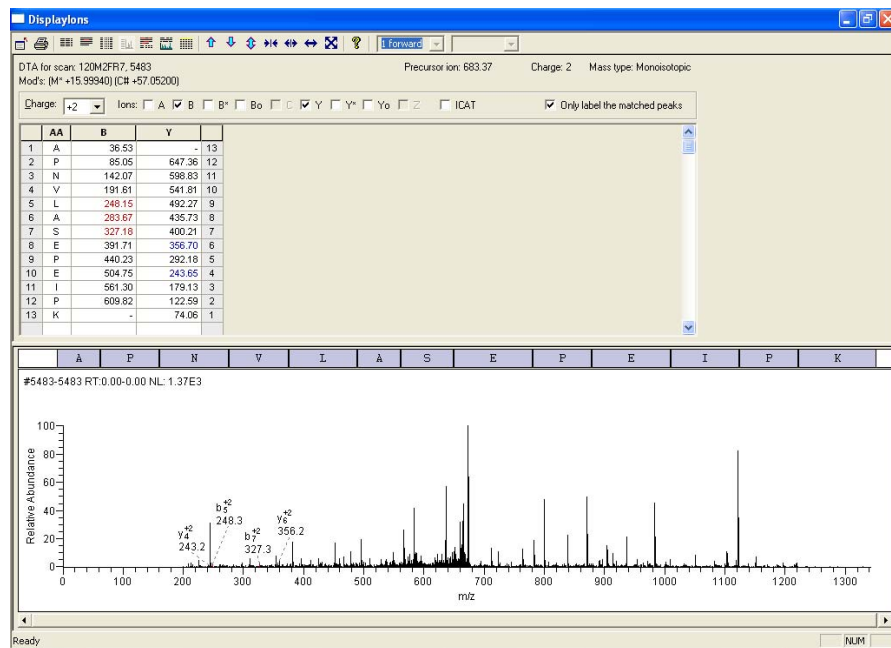

# KAAGAAAIITEPEHTKE

## IPI00222509.1, IPI00649648.1

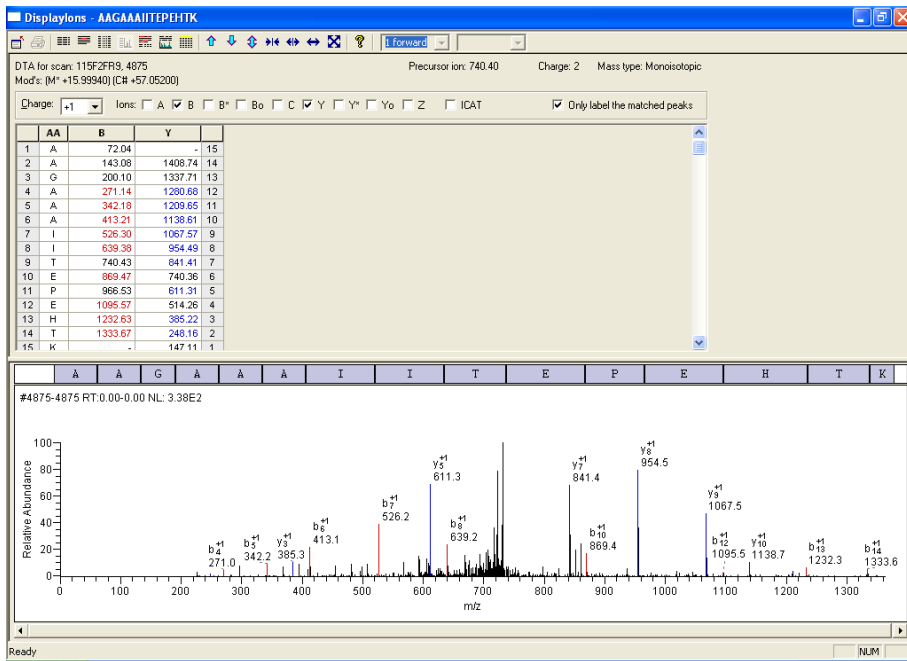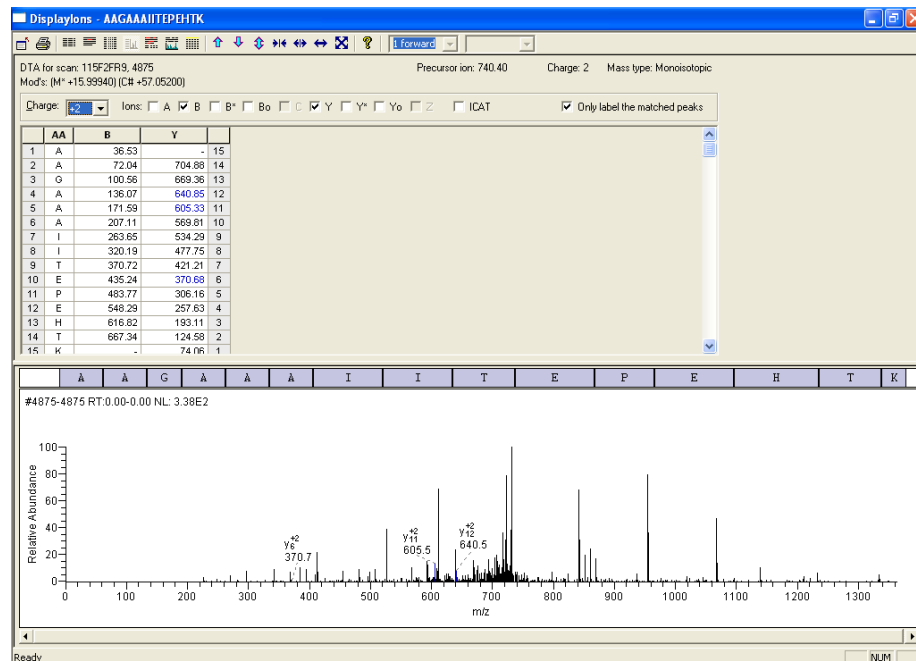

# KAEVLSEEPILKW IPI00132388.2

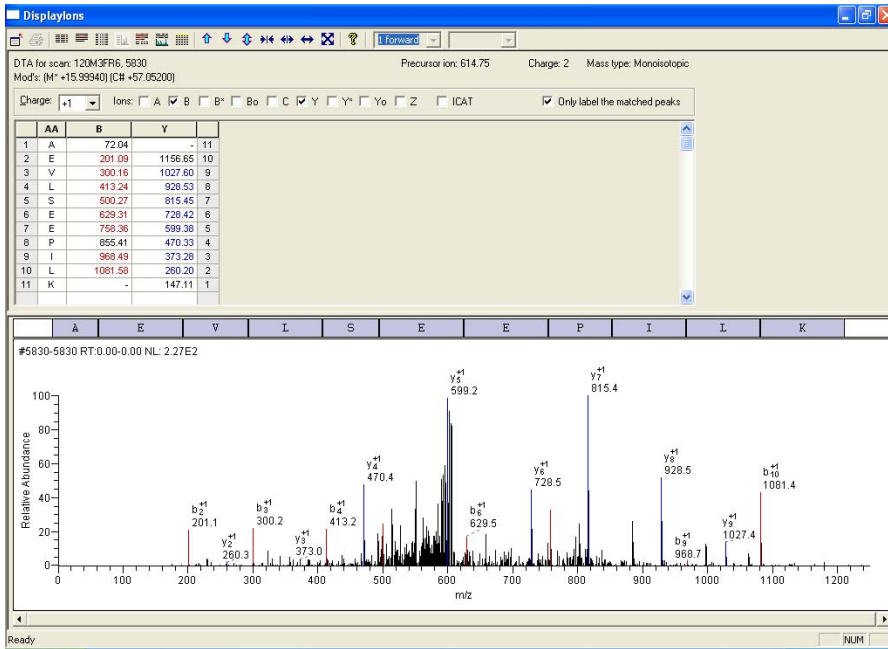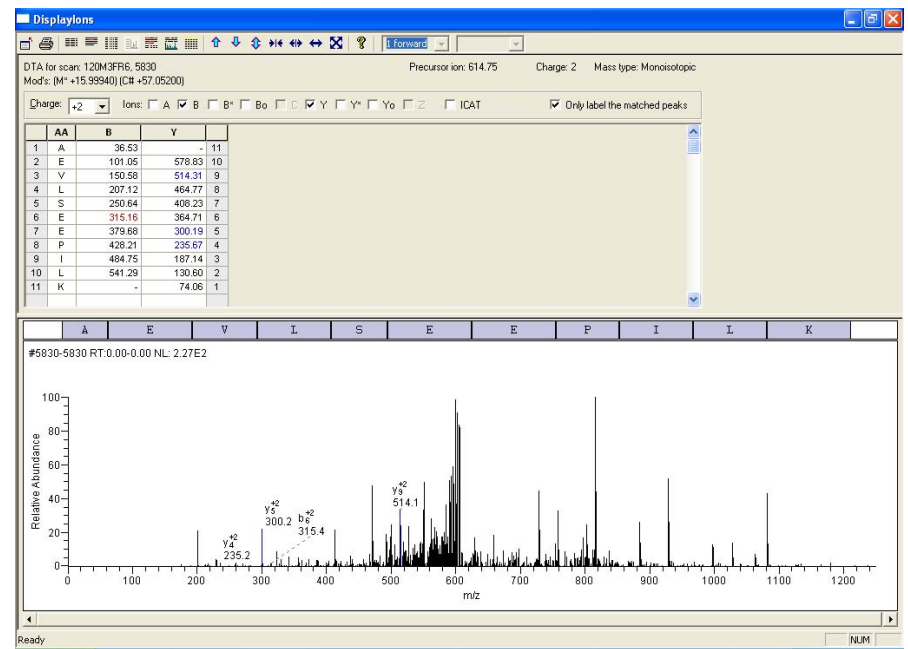

# KALGGASGGYTTGPEPLVSLLRQ IPI00136655.1

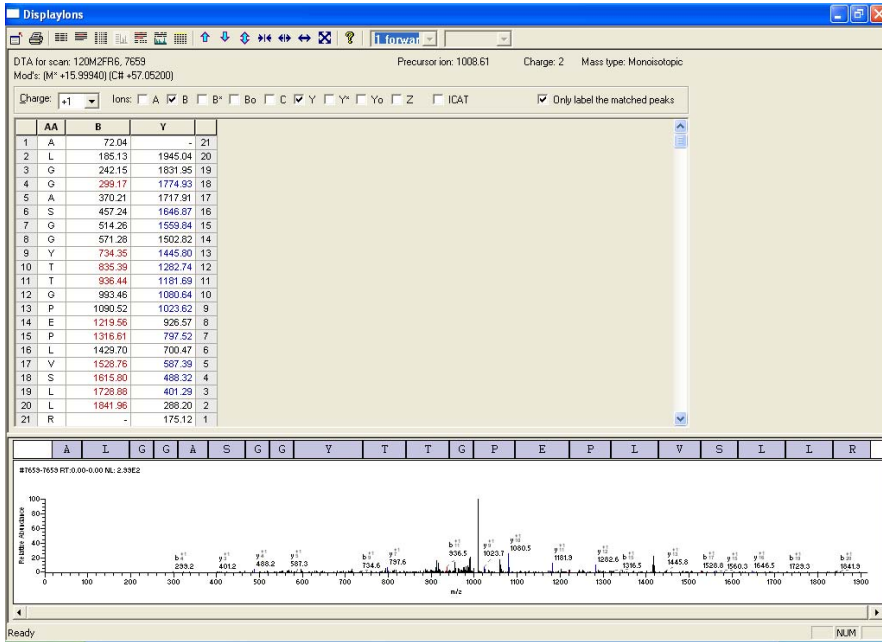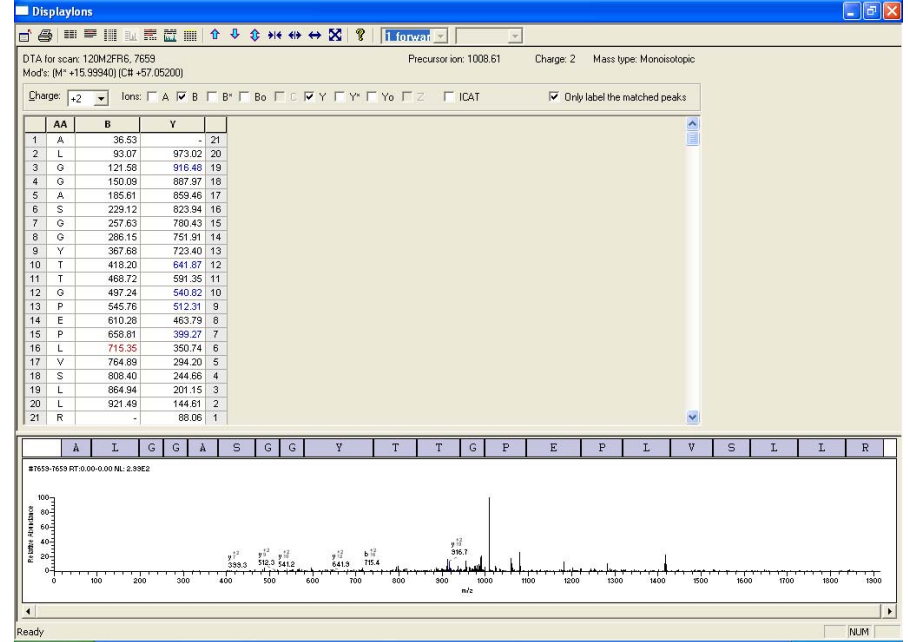

# KALIAAQYSGAQVRV

IPI00318841.3, IPI00408350.1, IPI00467651.4, IPI00662654.1, IPI00664589.1,  
IPI00678574.1

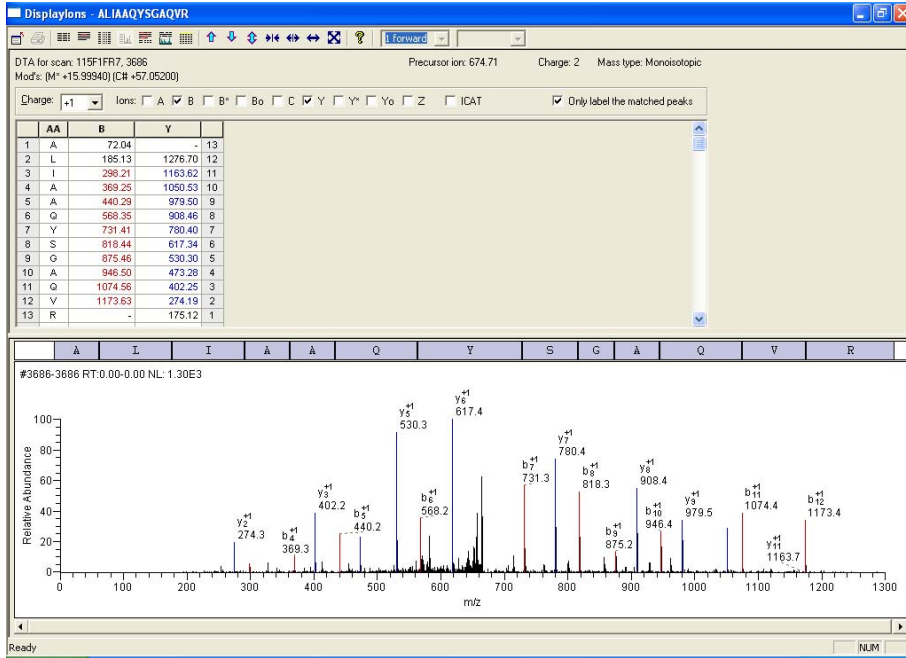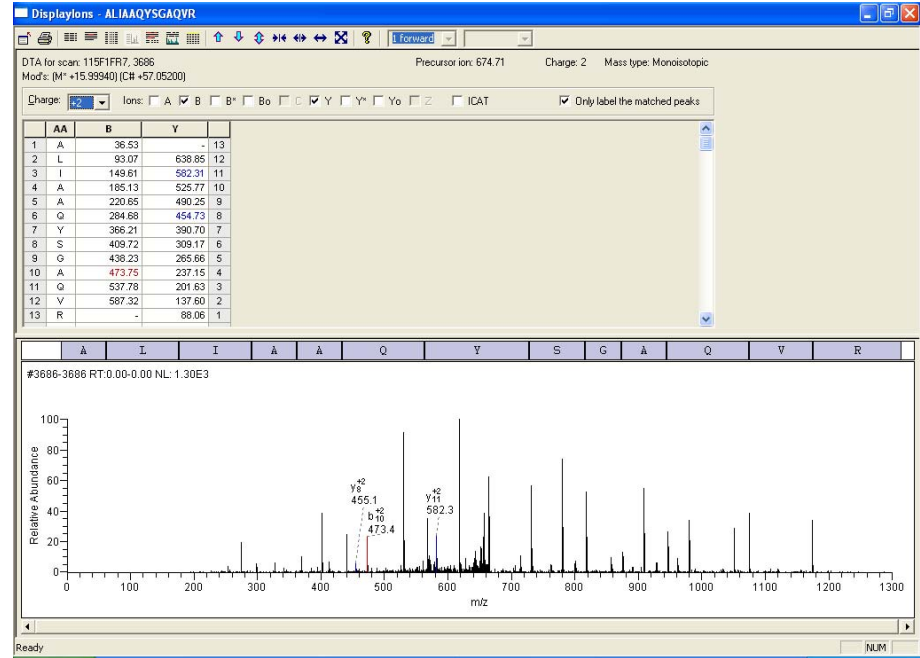

# KALQDLENAASGDATVRQ

IPI00338515.4, IPI00653738.2, IPI00750262.1, IPI00752391.1, IPI00752914.1,  
IPI00753452.1

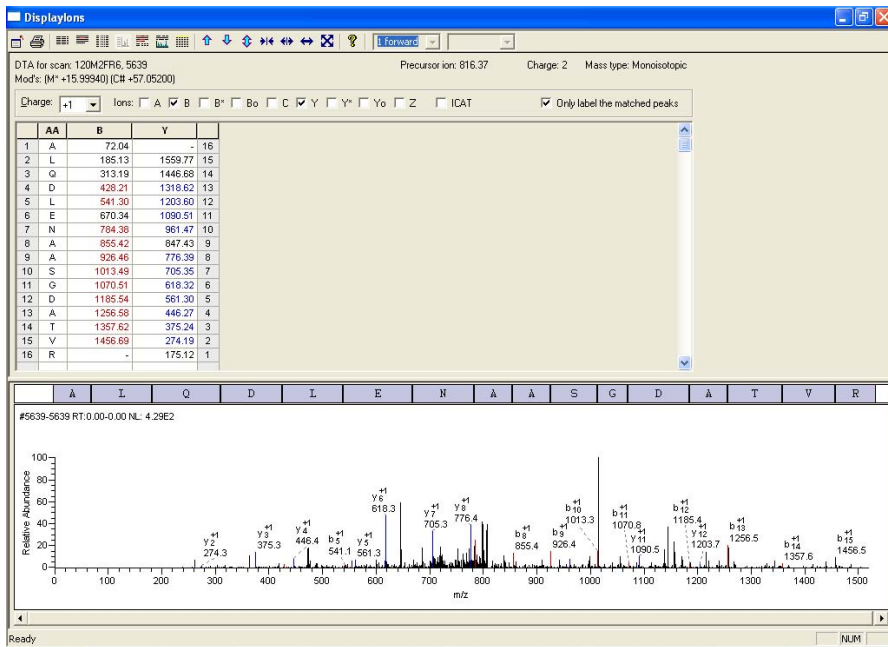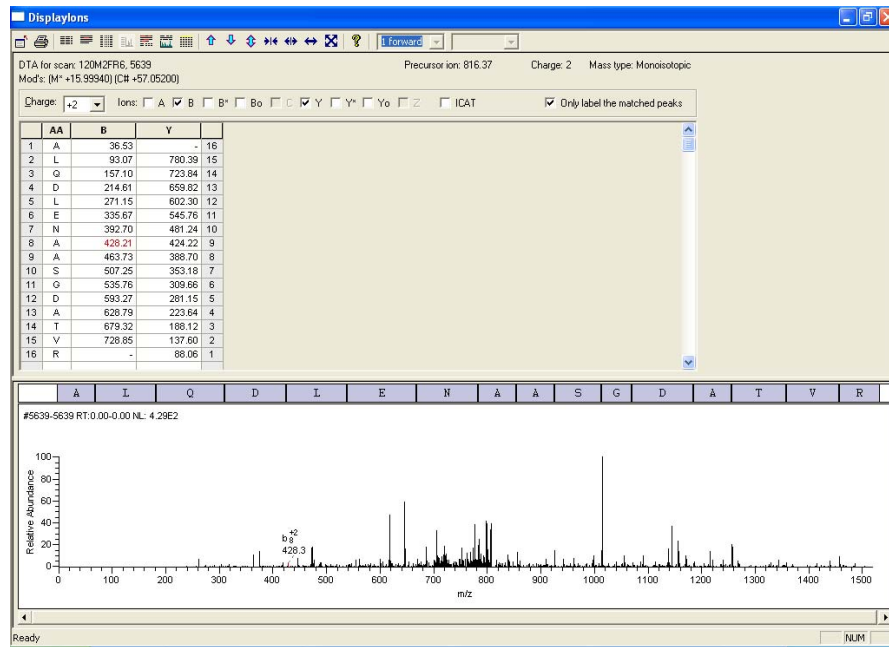

# KANKLDHVVTIIKG

IPI00120495.1, IPI00229961.1, IPI00229962.1, IPI00474360.1

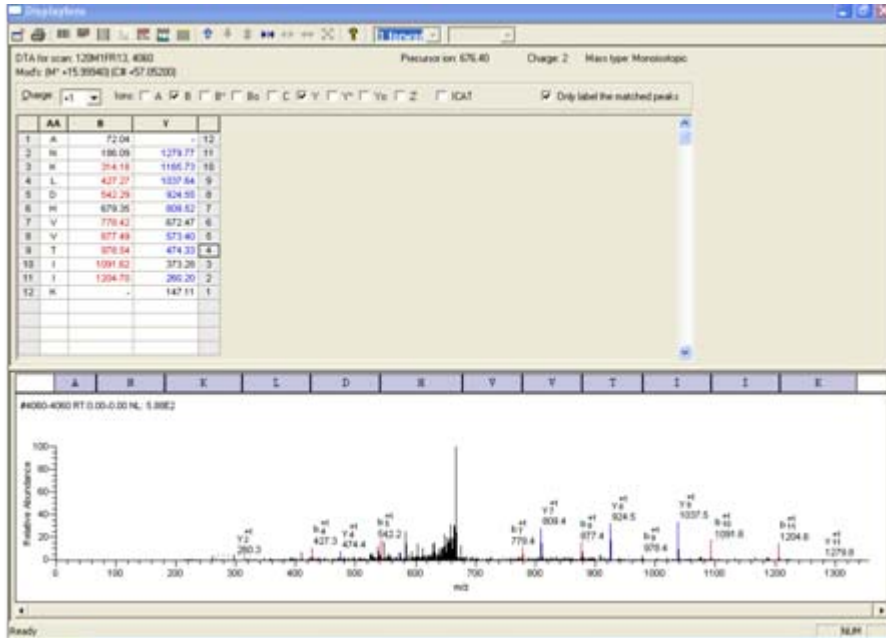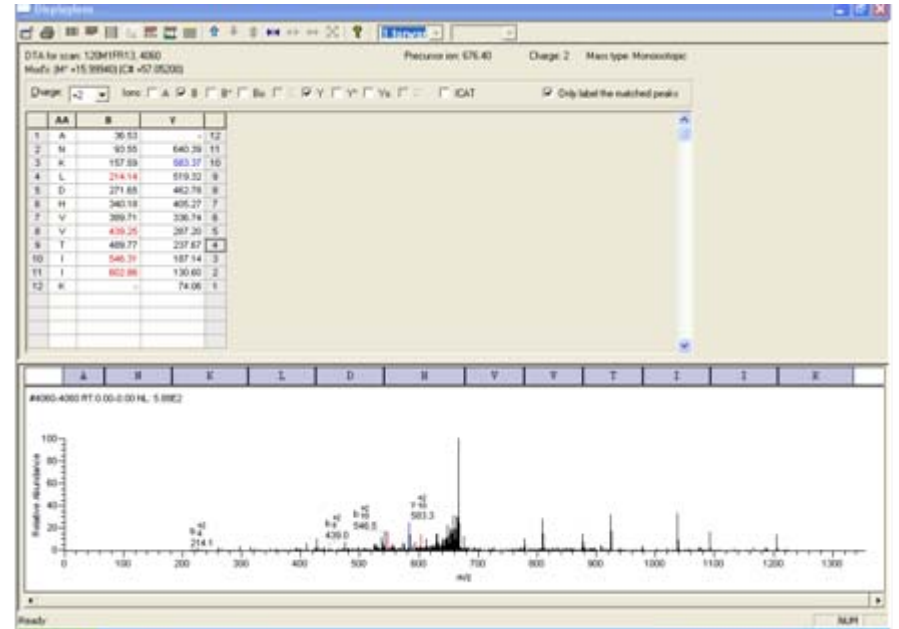



# KAPILIATDVASRG

IPI00396797.2, IPI00405364.2, IPI00420363.2, IPI00648528.1, IPI00653307.1

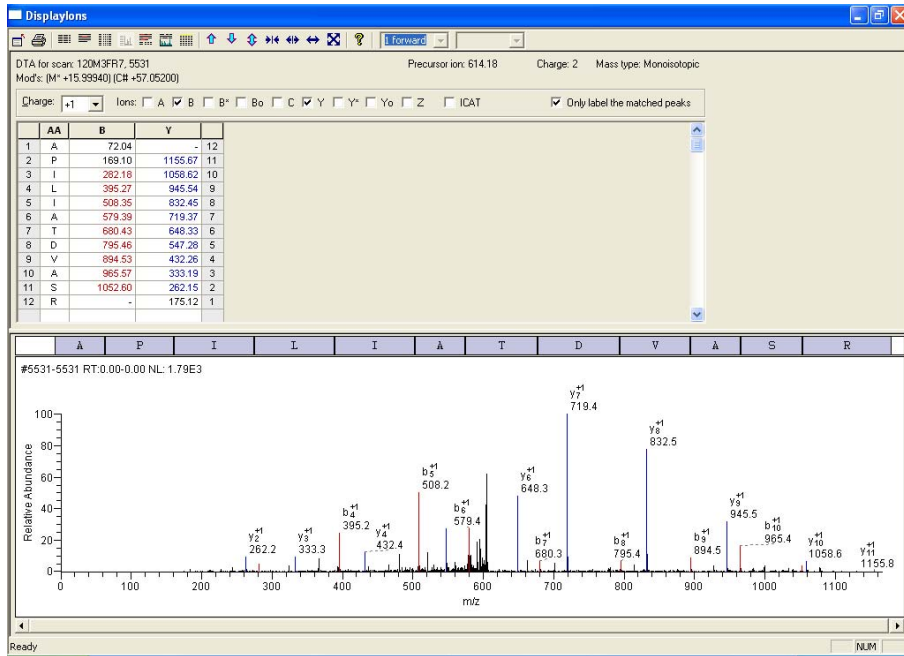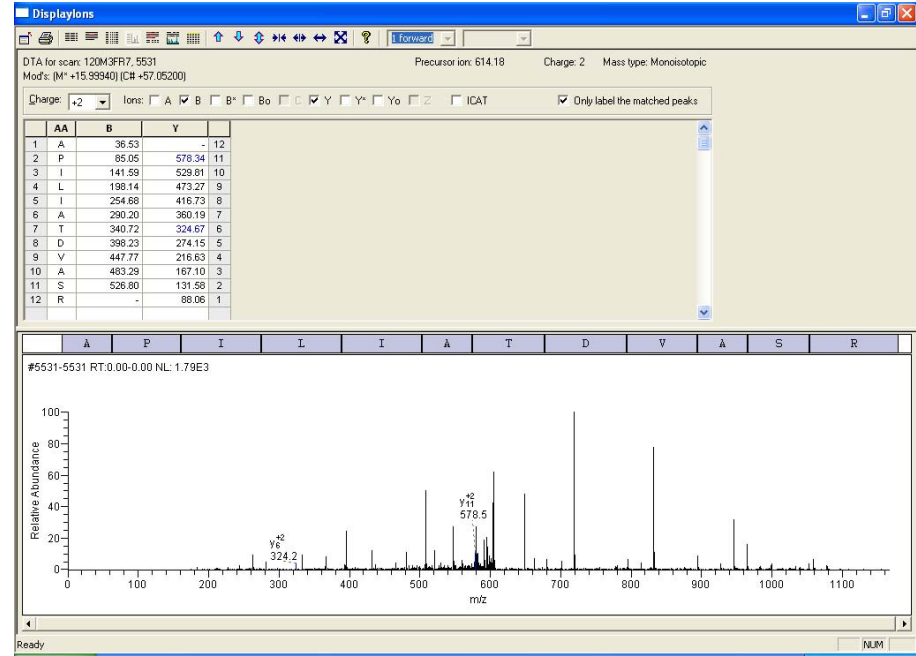

# KAPVPTGEVYFADSFDRG IPI00119618.1

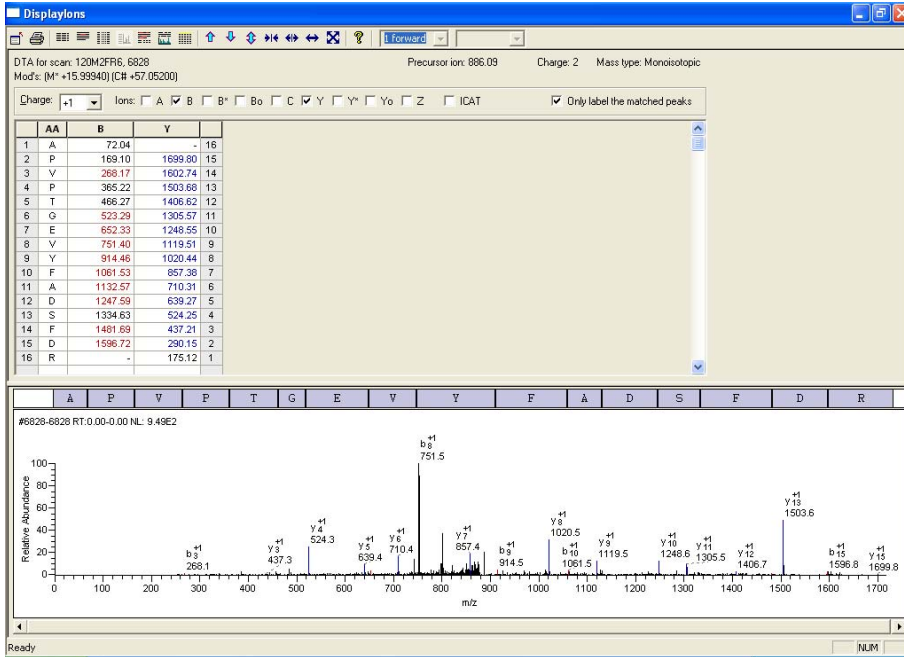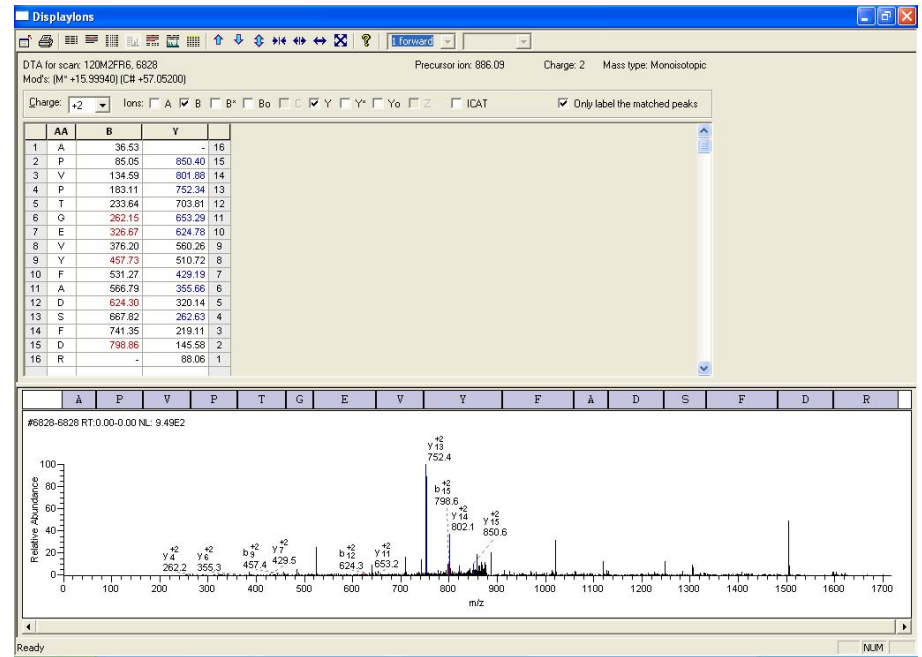

# KAQQVSQGLDVLAKV IPI00405227.2

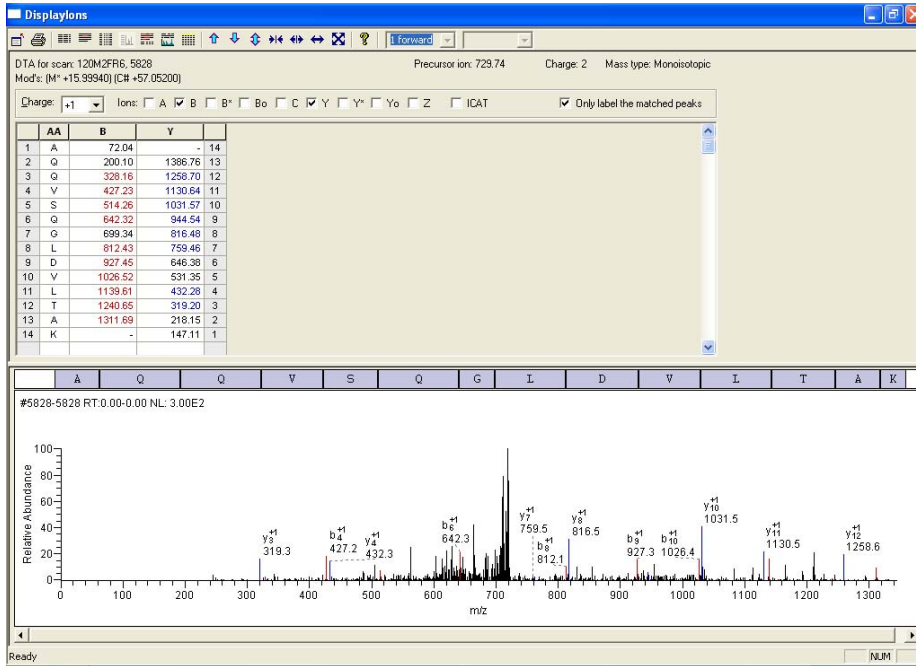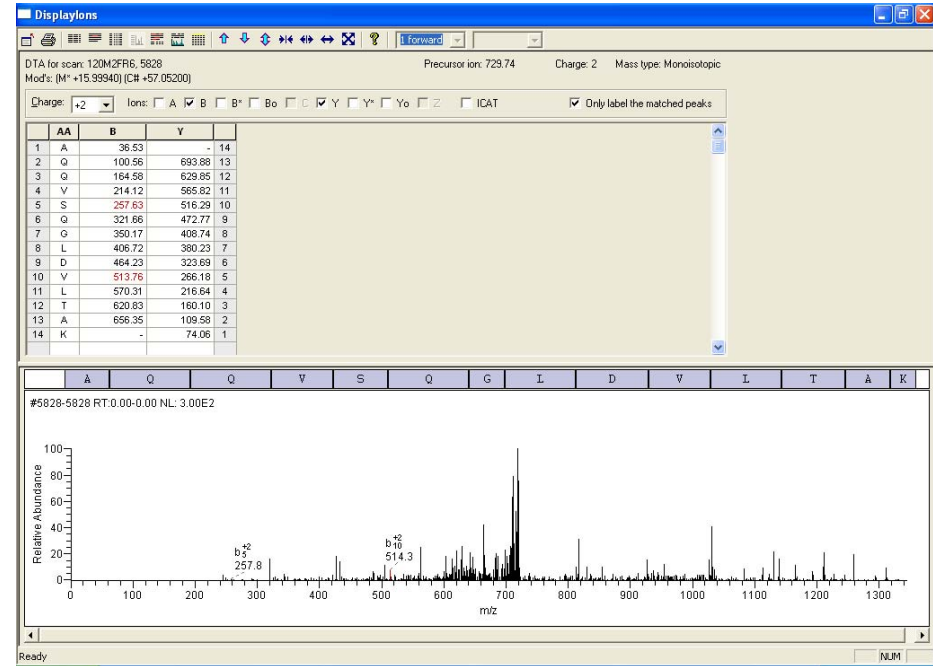

# KAQSELSGAADEAARA IPI00453777.2

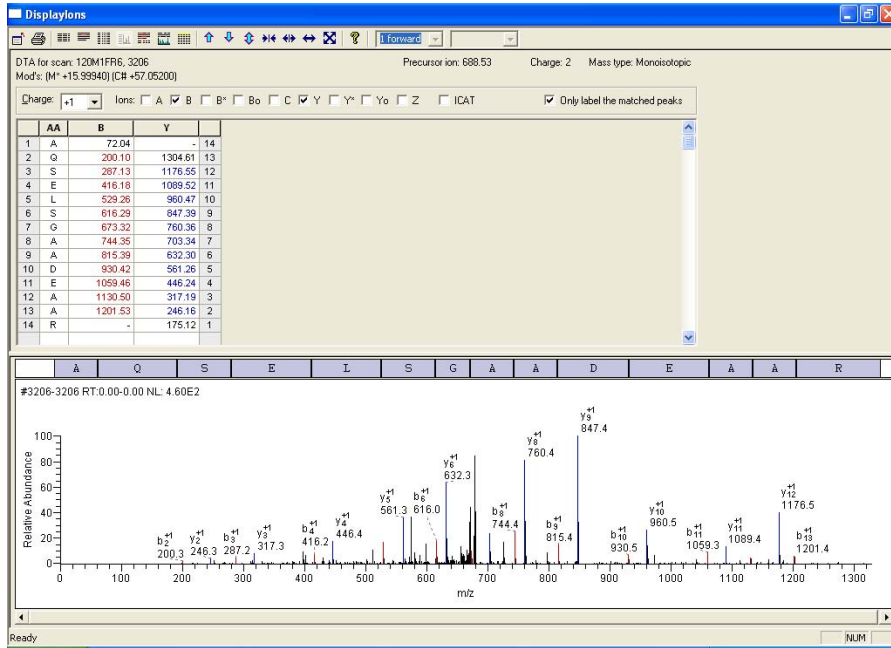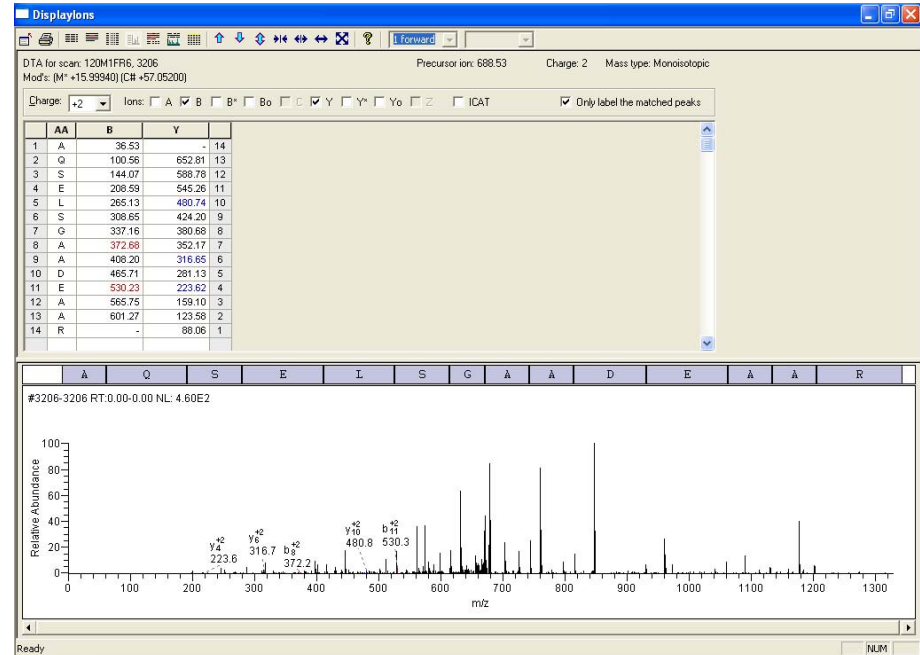

# KAQVAQPGGDTIFGKI IPI00108189.3

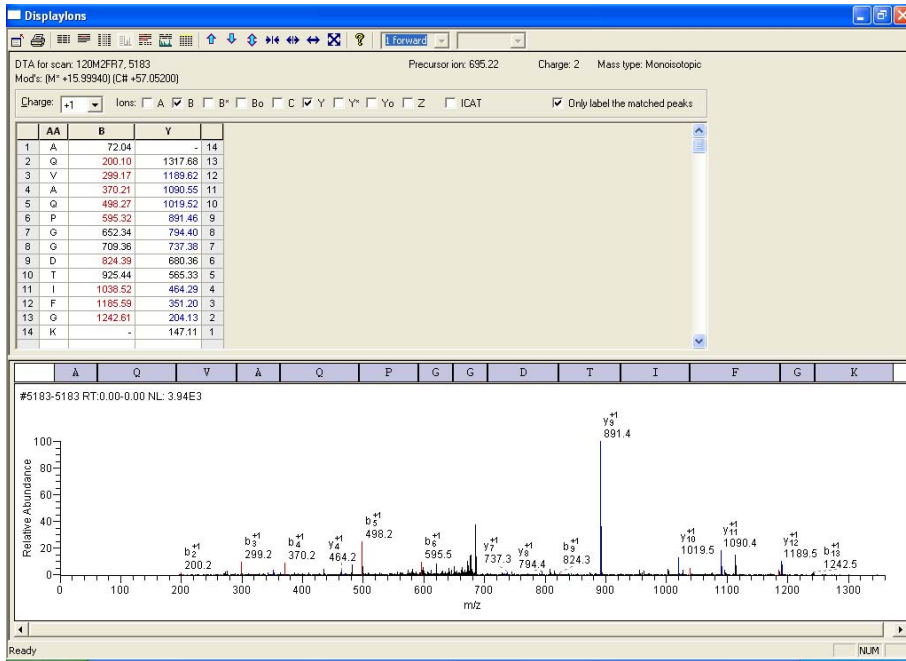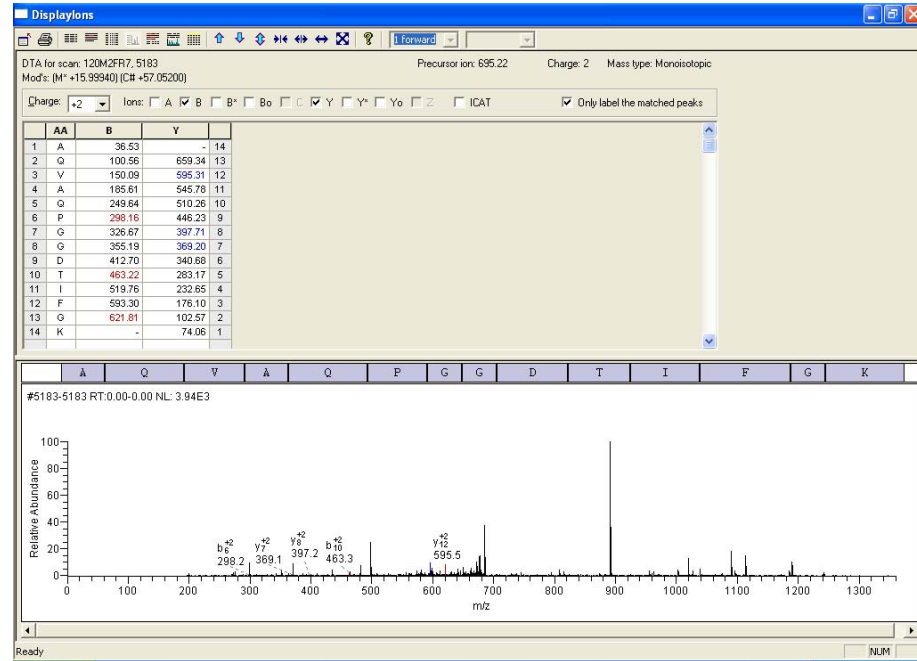

# KATQTLQTLGEAQSKG

## IPI00331361.2, IPI00652799.1

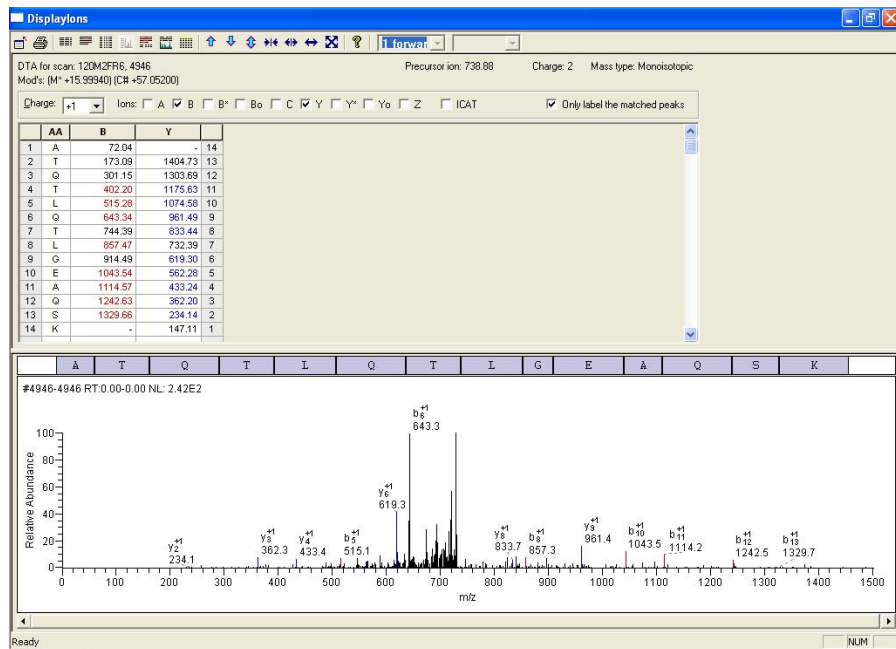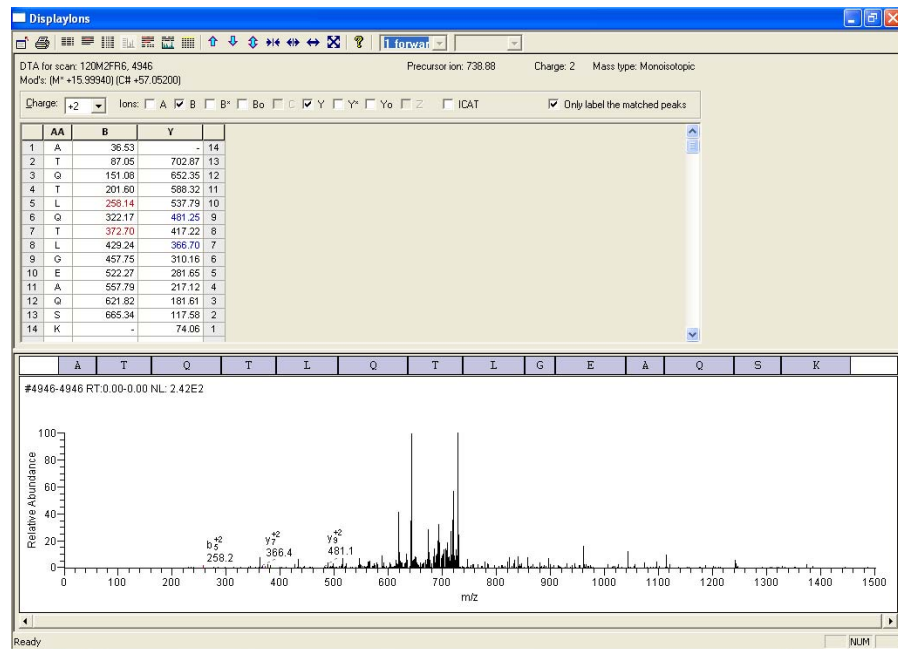

# KAVAQGNLSSADVQAAKN IPI00119138.1

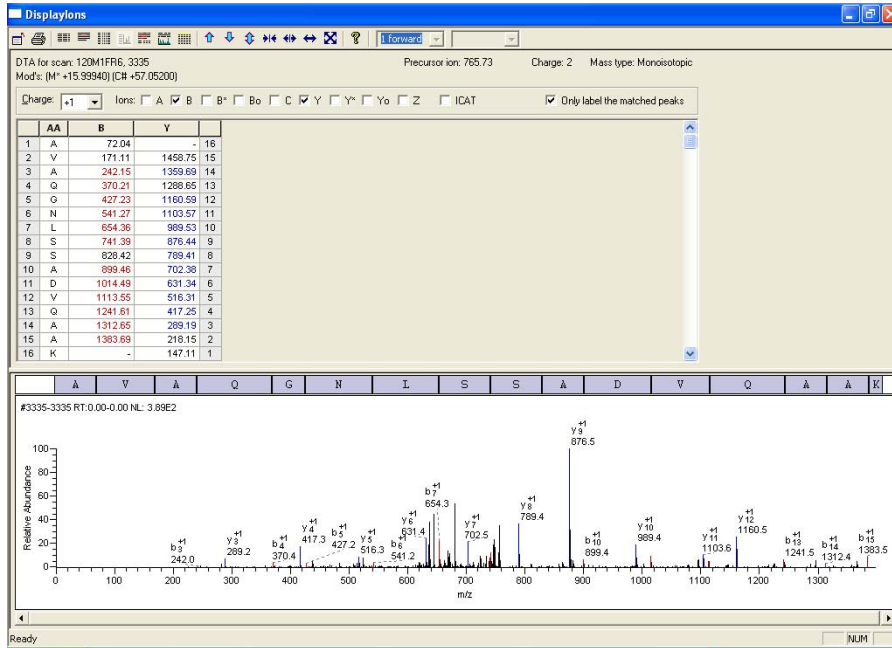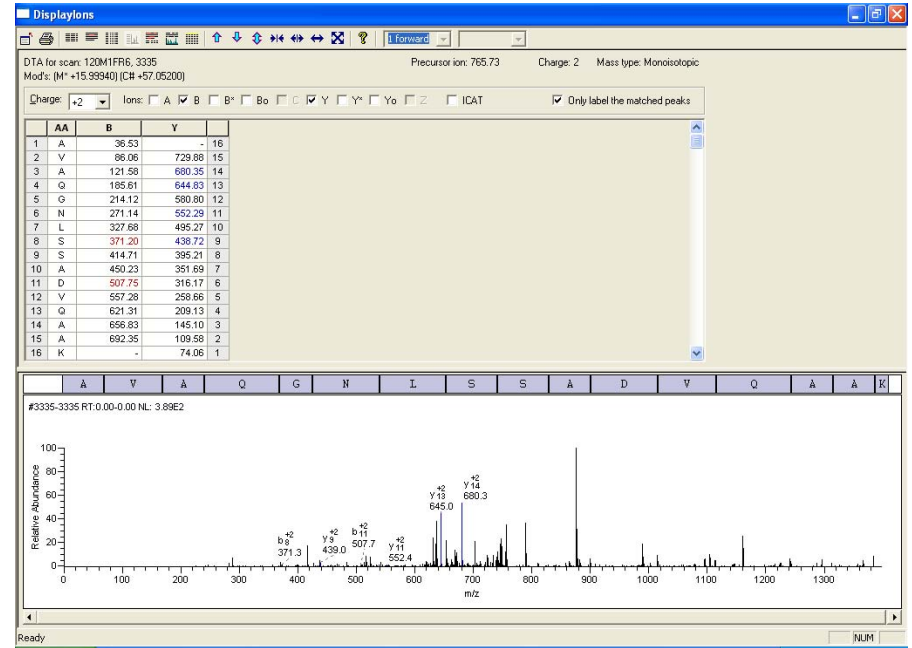

# KAVTEQGAELSNEERN

## IPI00408378.4, IPI00656269.1, IPI00754545.1

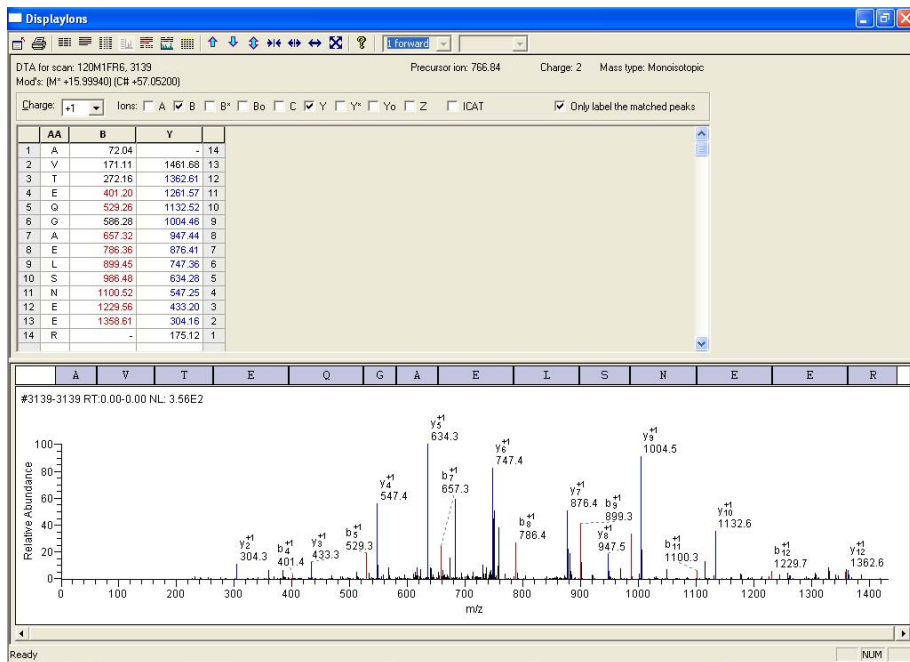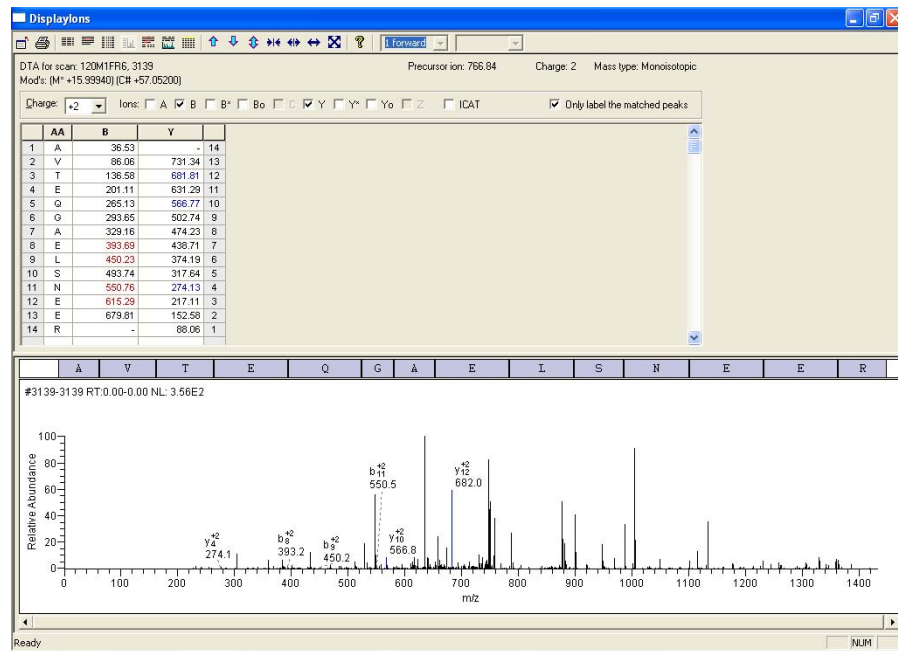



# KDAEDQEAQLKN IPI00132942.1

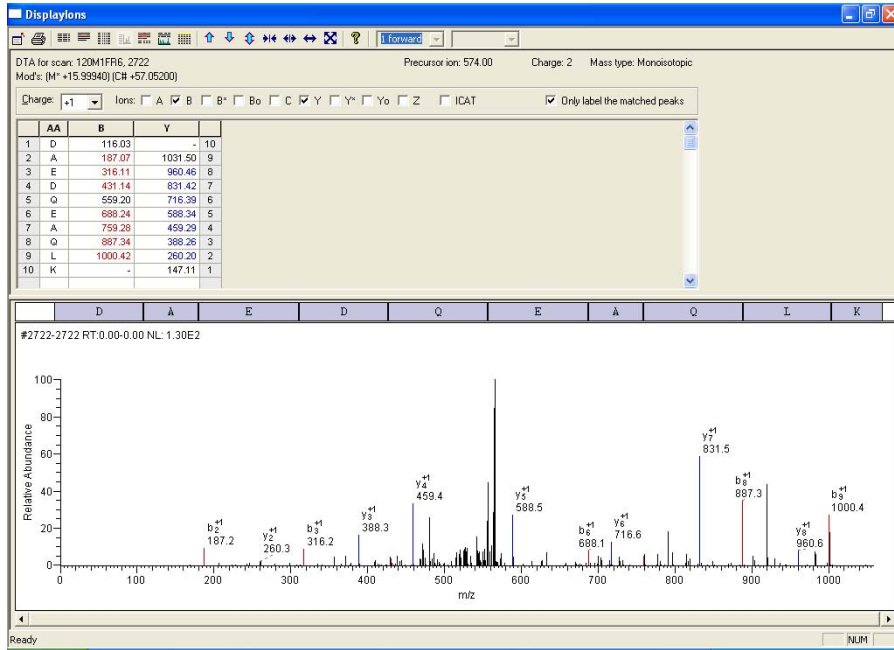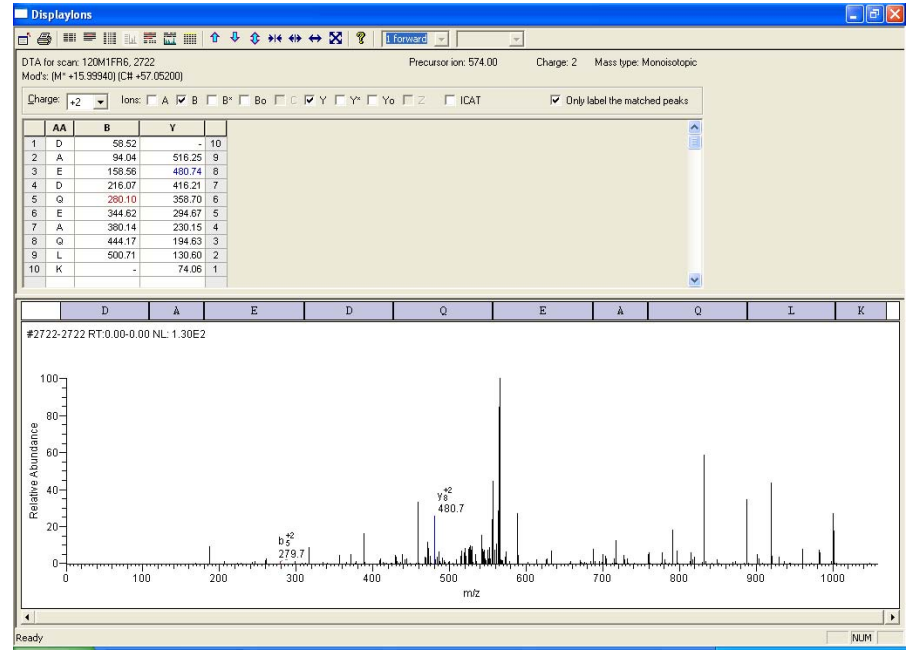

# KDEQGSAAEDSPTEAVRL IPI00112719.1

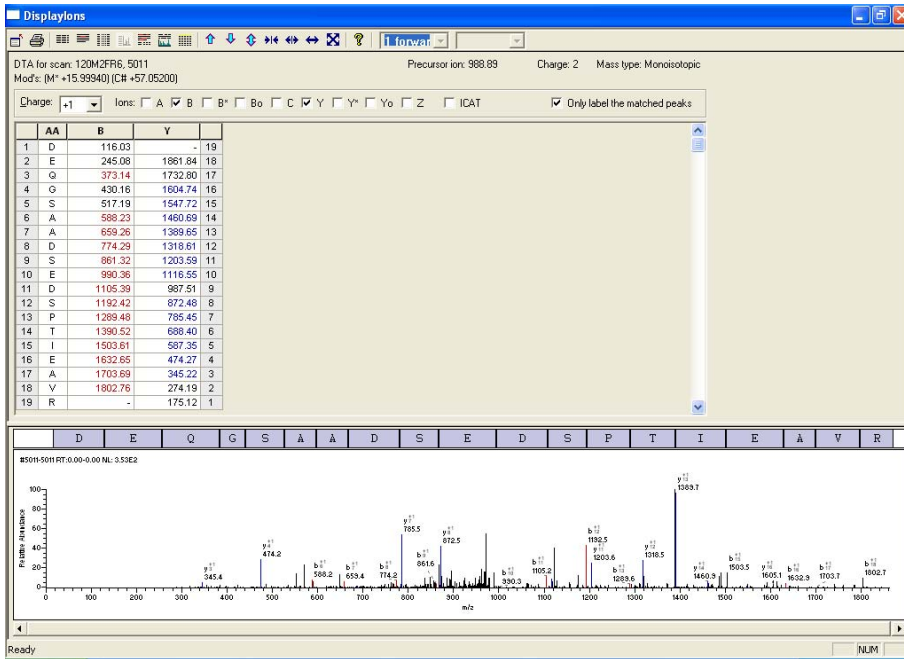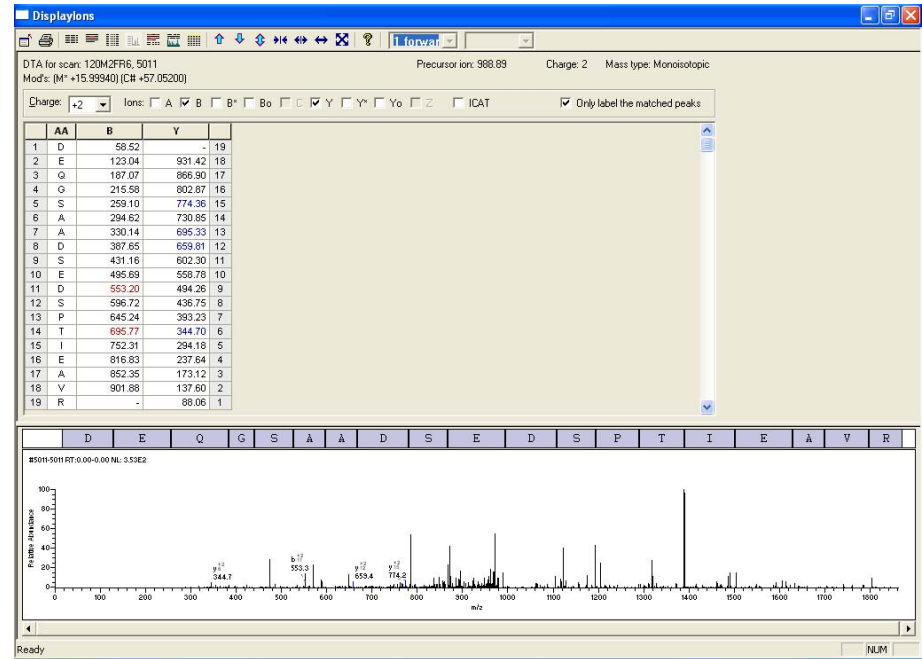

# KDFTPAQAQAFQKV

IPI00126208.1, IPI00316491.3, IPI00553333.1, IPI00621417.1, IPI00663327.2,  
IPI00755359.1

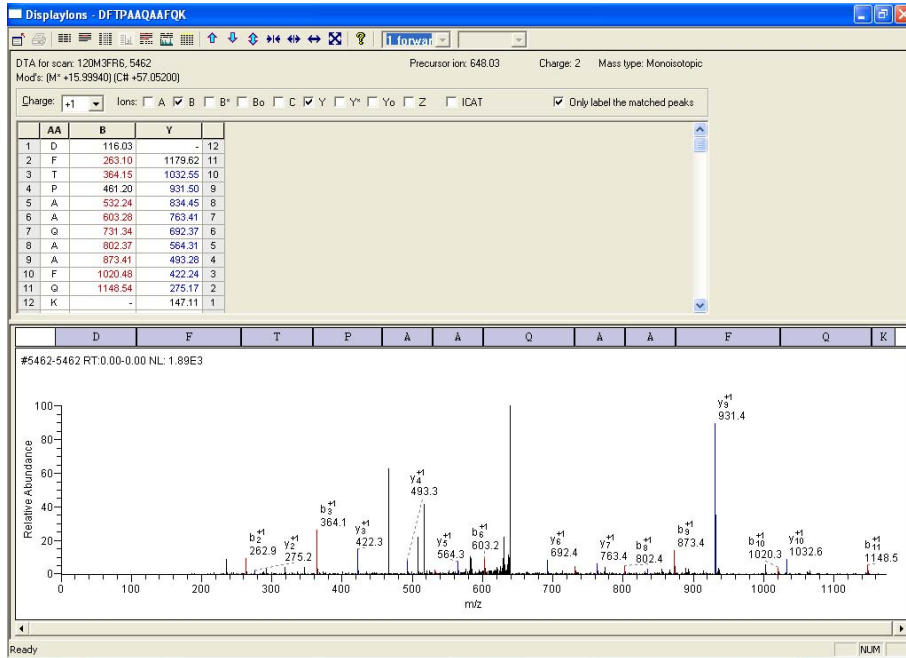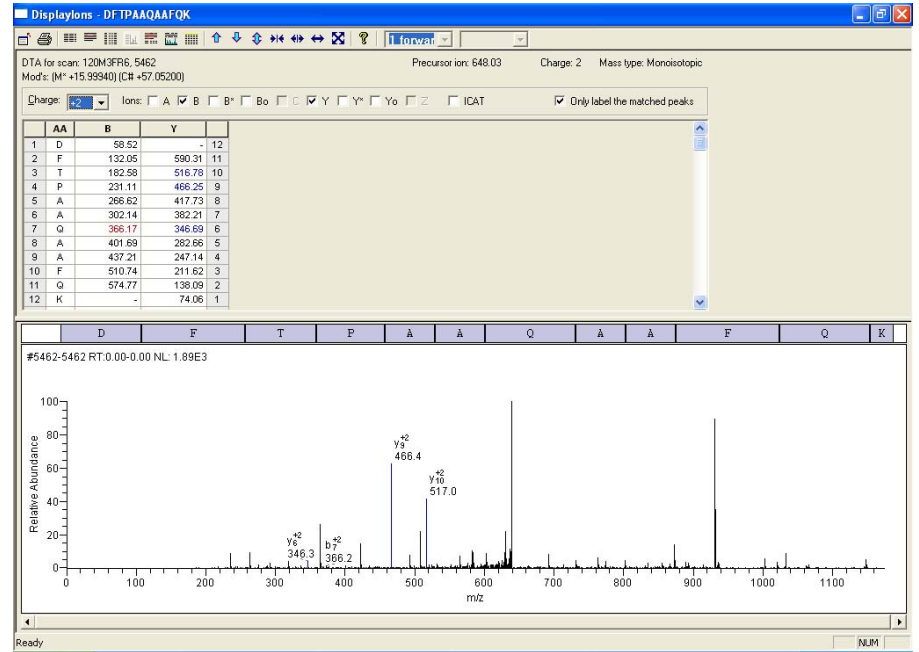

# KDIINEEEVQFLKT

## IPI00321308.4

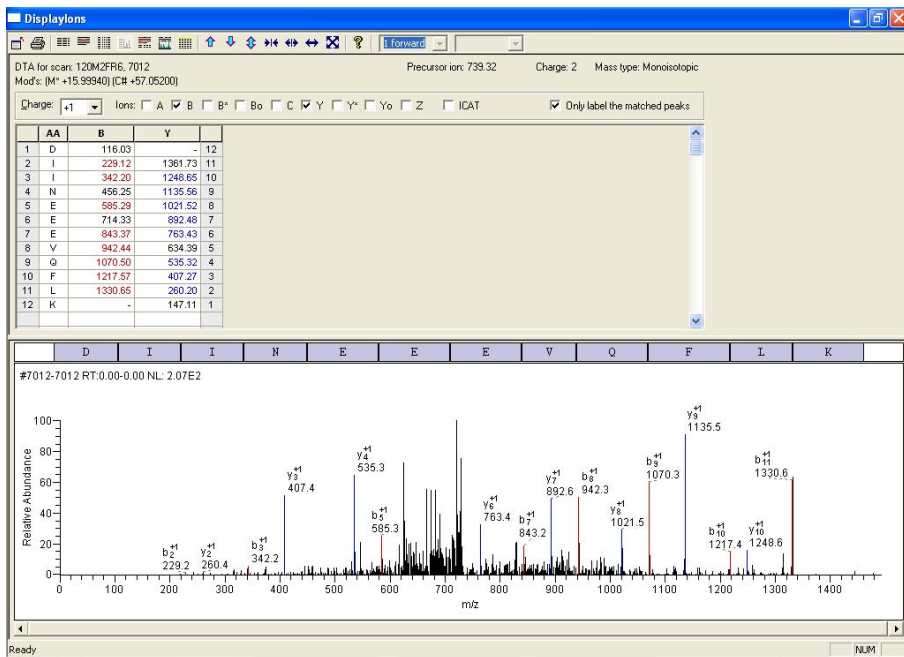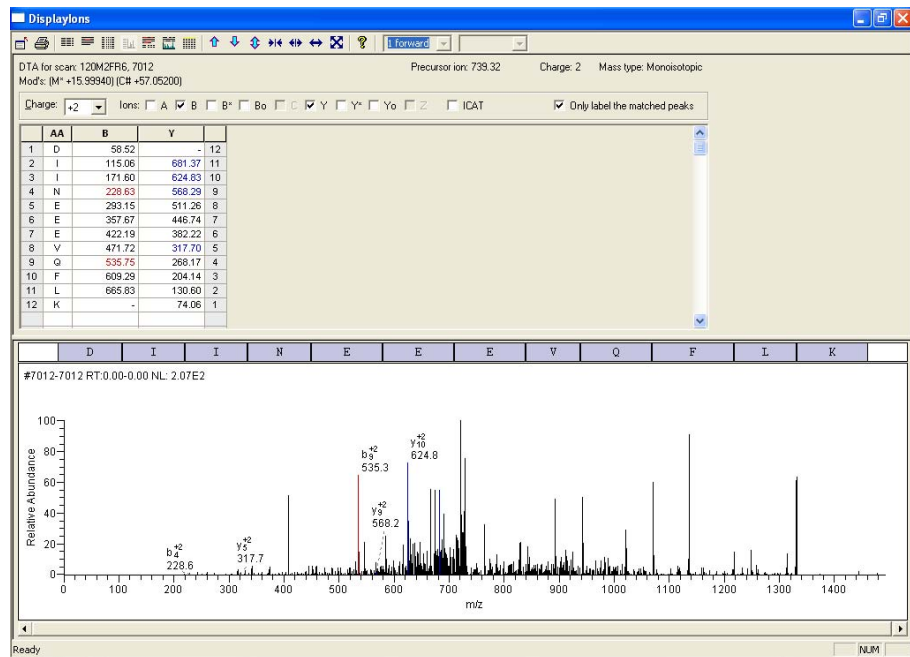

# KDIPVLVATDVAARG IPI00329839.6

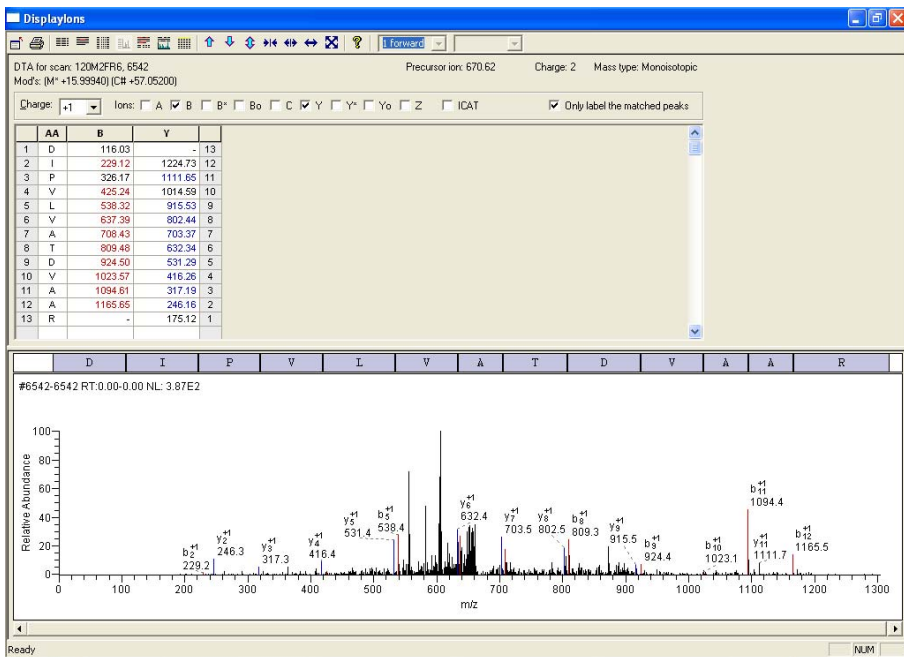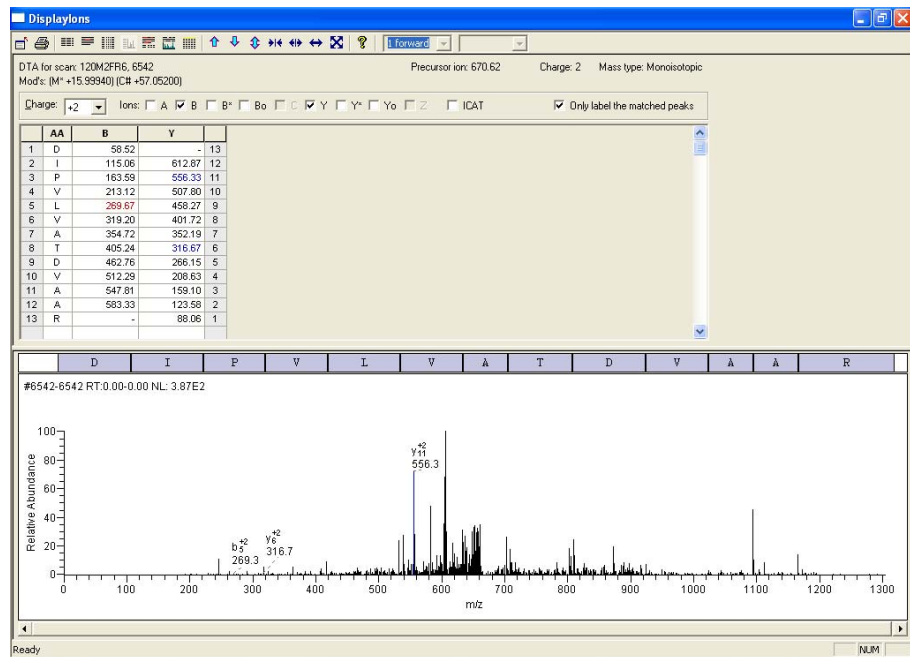

# KDLLEVADILEKA IPI00117083.1

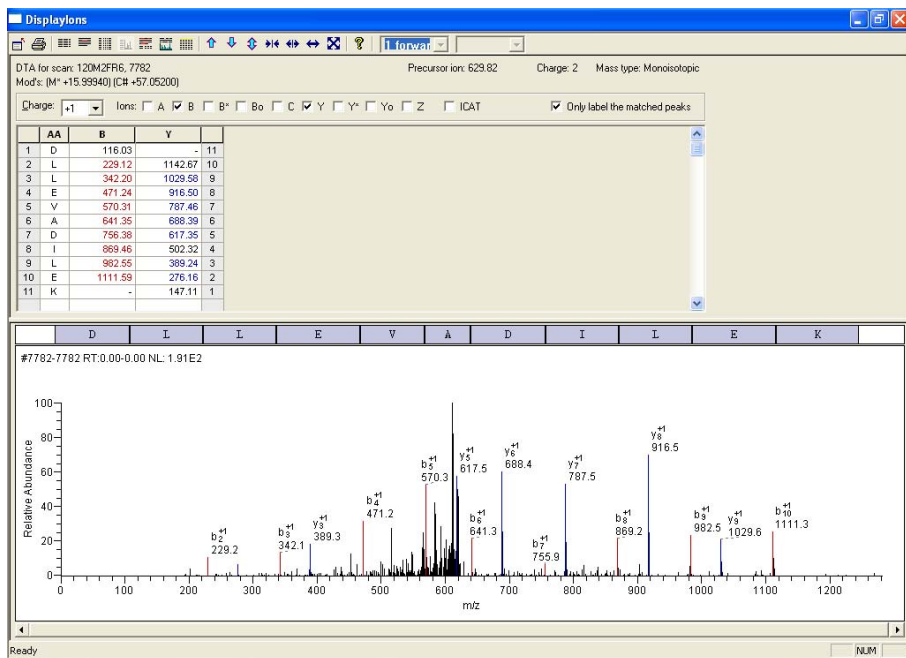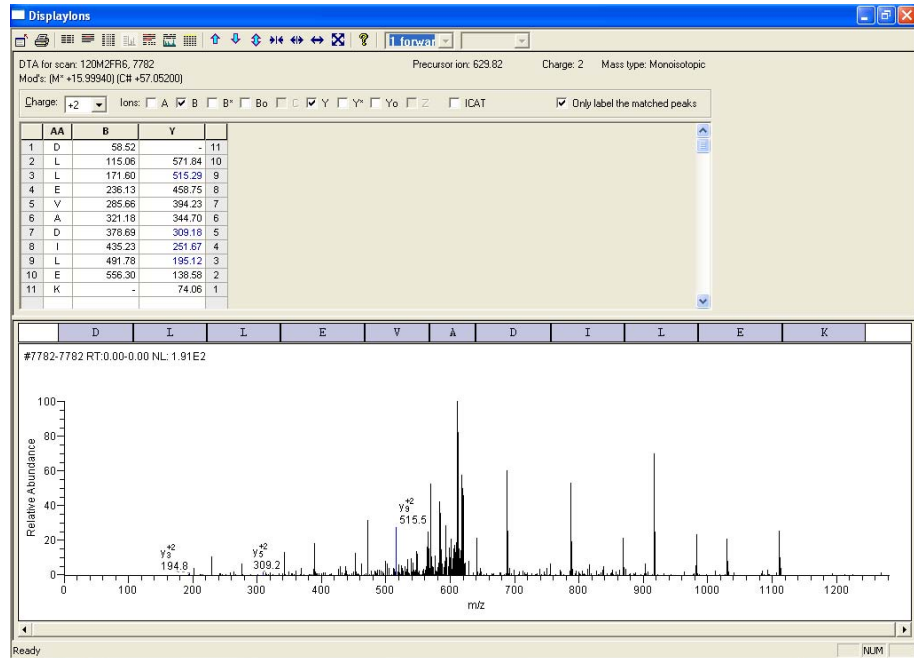

# KDLSTVEALQNLKN

## IPI00130016.1, IPI00277026.1

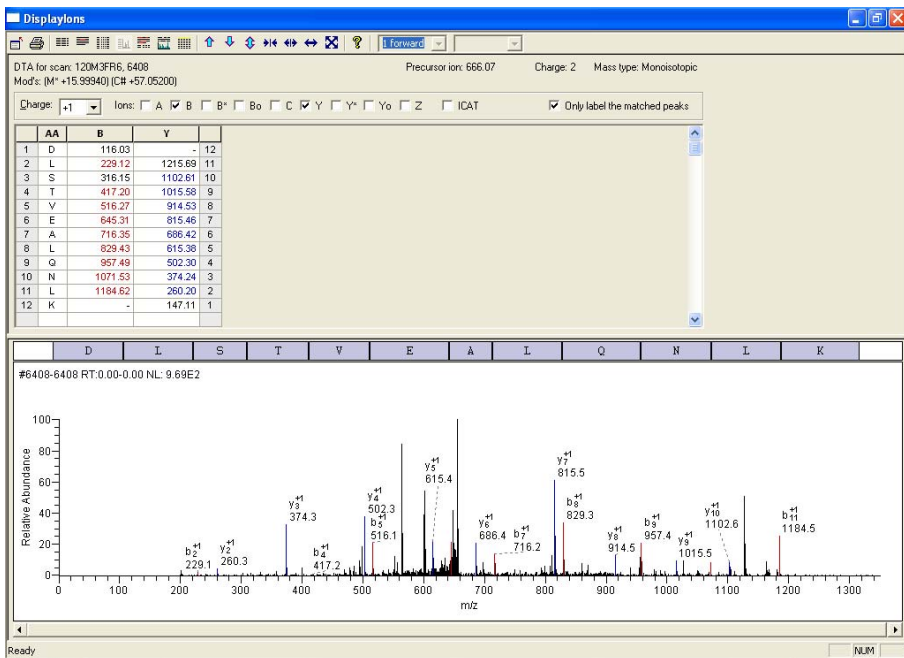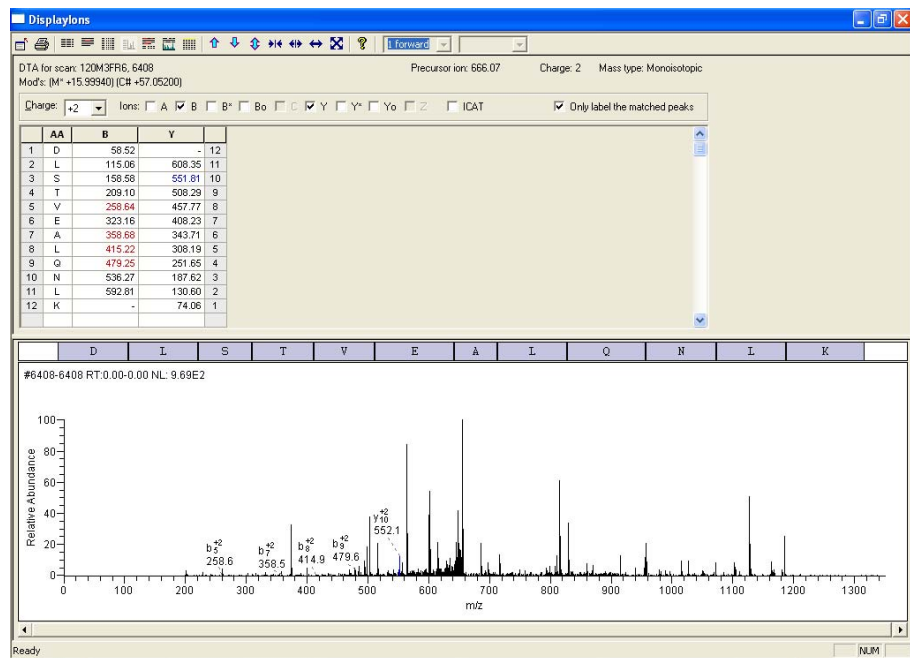

# KDNNQFASASLDRT IPI00115097.1

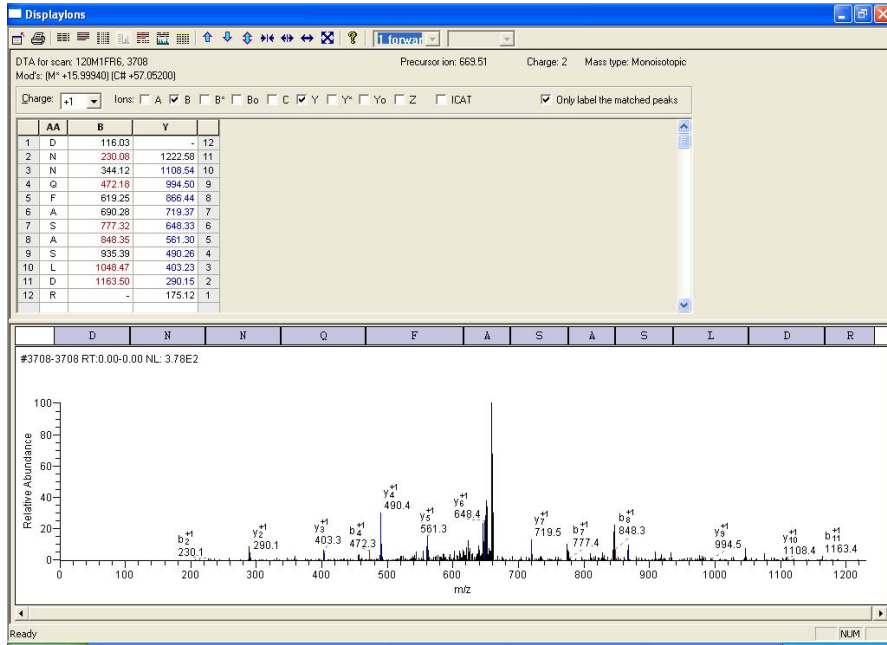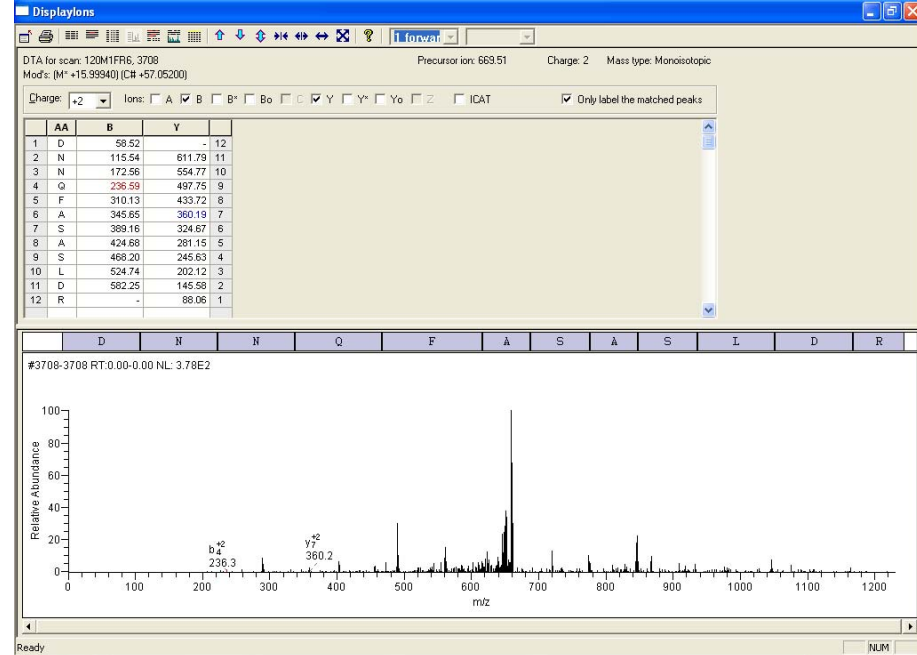



# KD TTASAVAVGLRQ

## IPI00223092.4

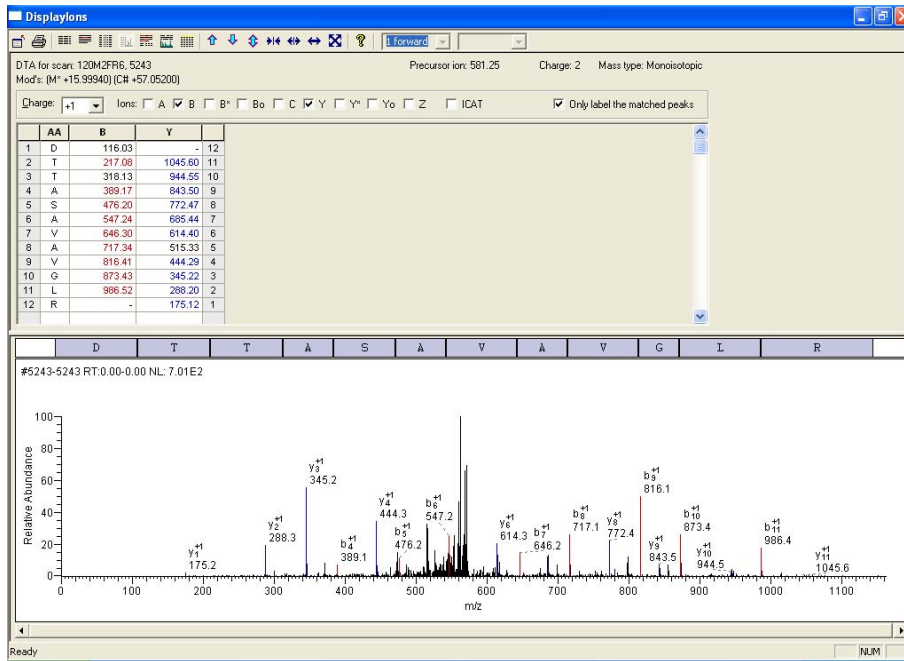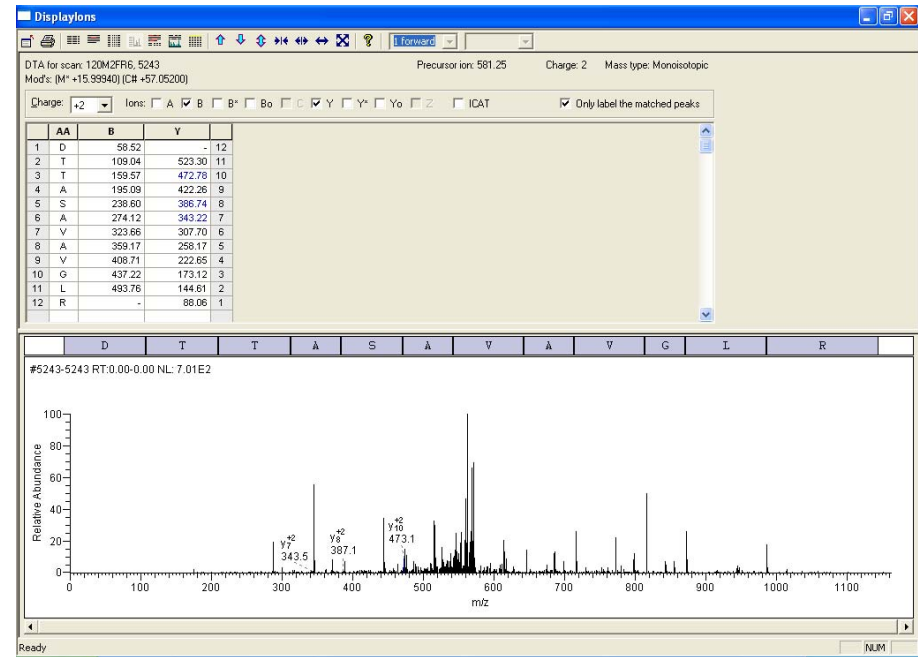

# KDVSTTLNADEAVARG IPI00224109.2

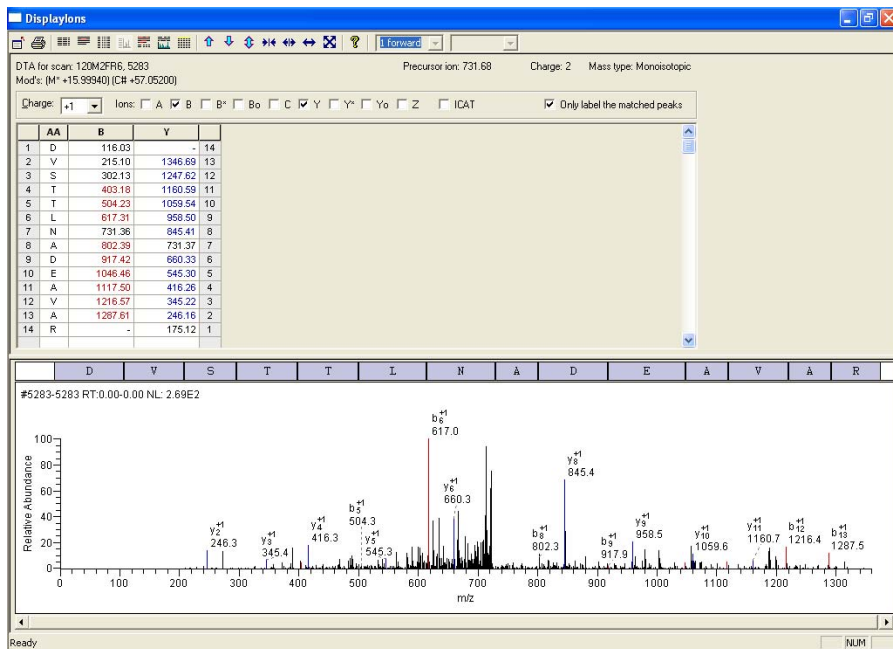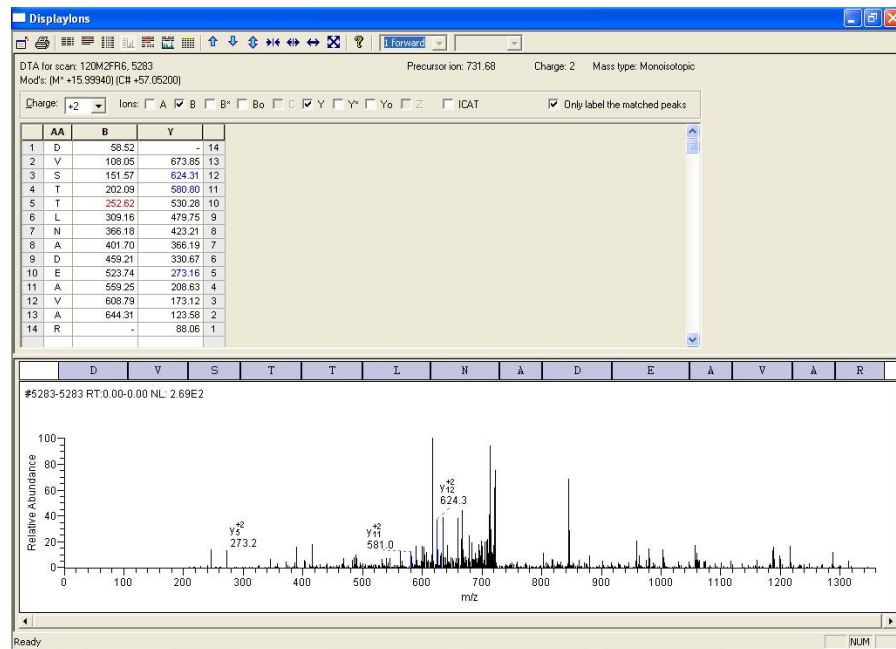

# KEAFQEALAAAGDKL

## IPI00226993.4

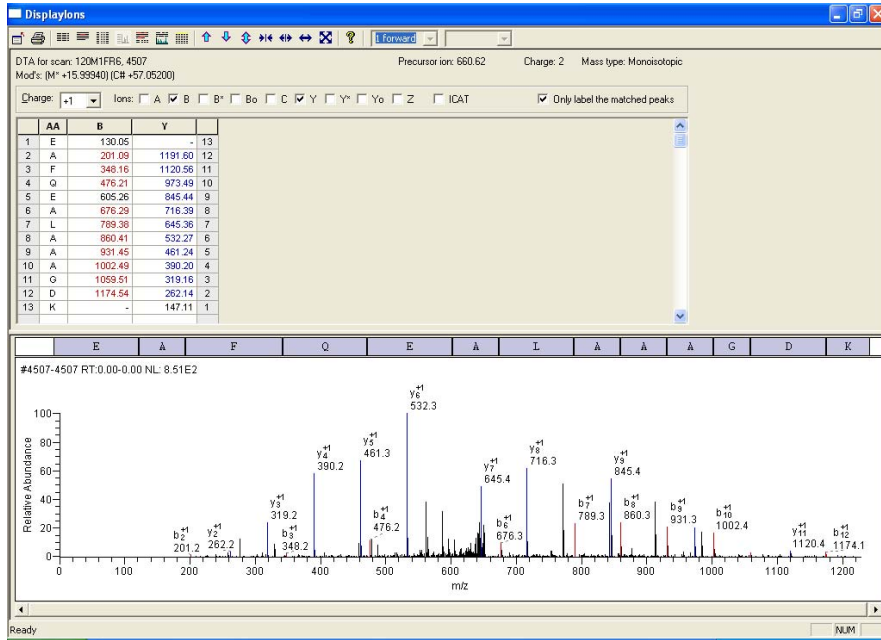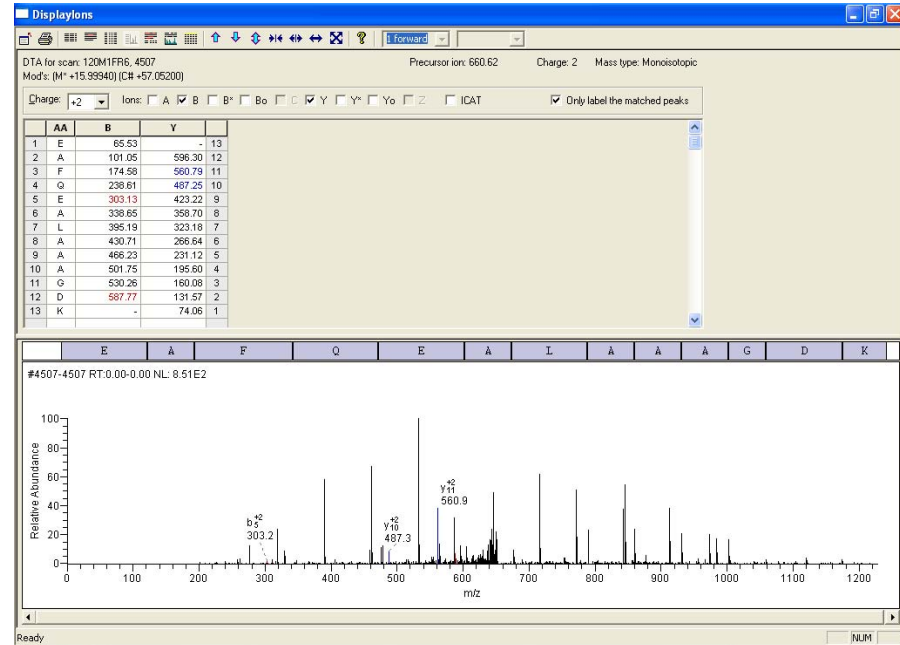

# KEFADSLGIPFLETSAKN

## IPI00114560.4, IPI00467910.4

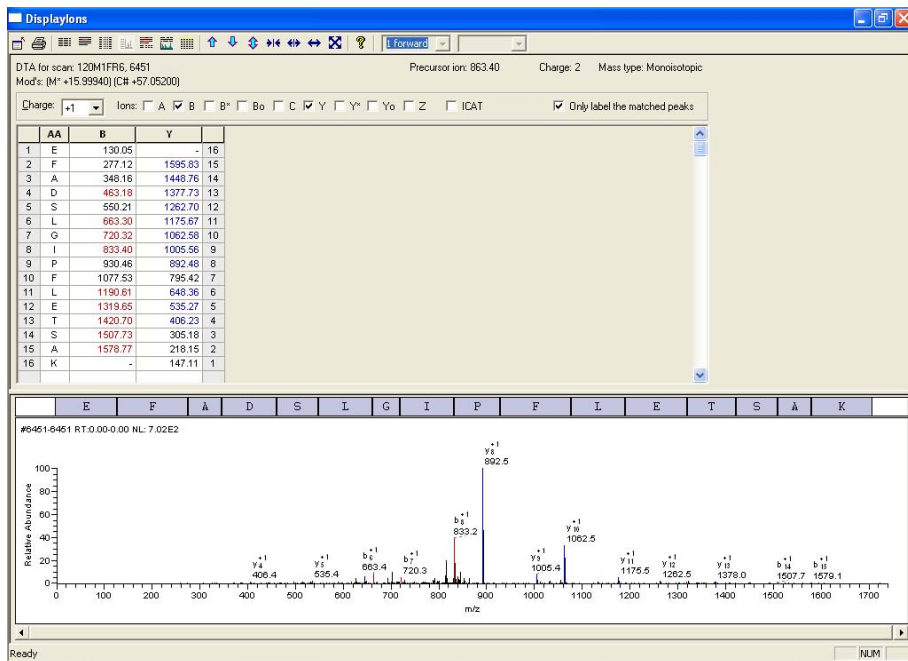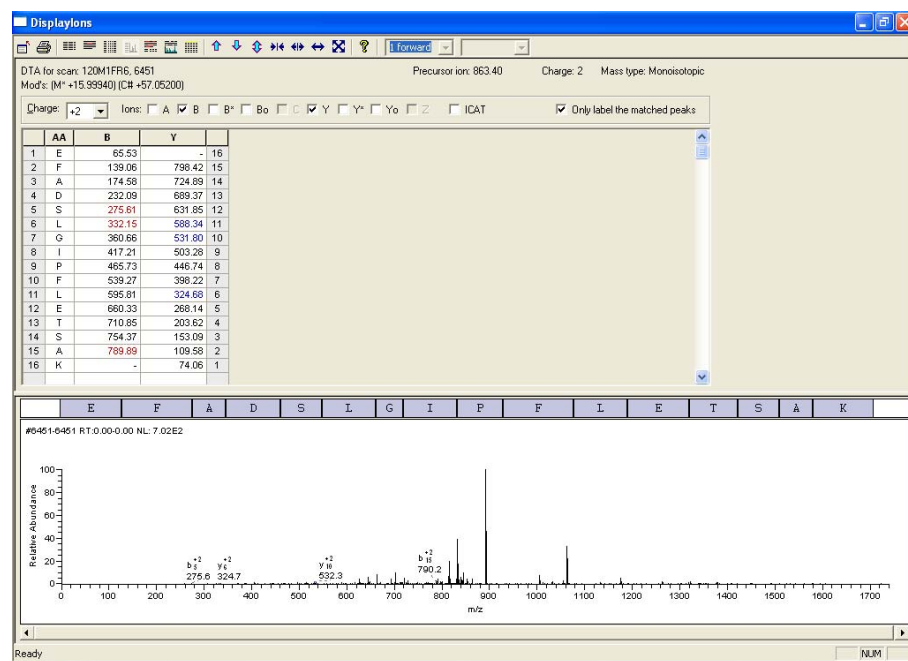

# KEGGLGPLNIPLLDVTKS

## IPI00117910.2, IPI00675014.1, IPI00677474.1

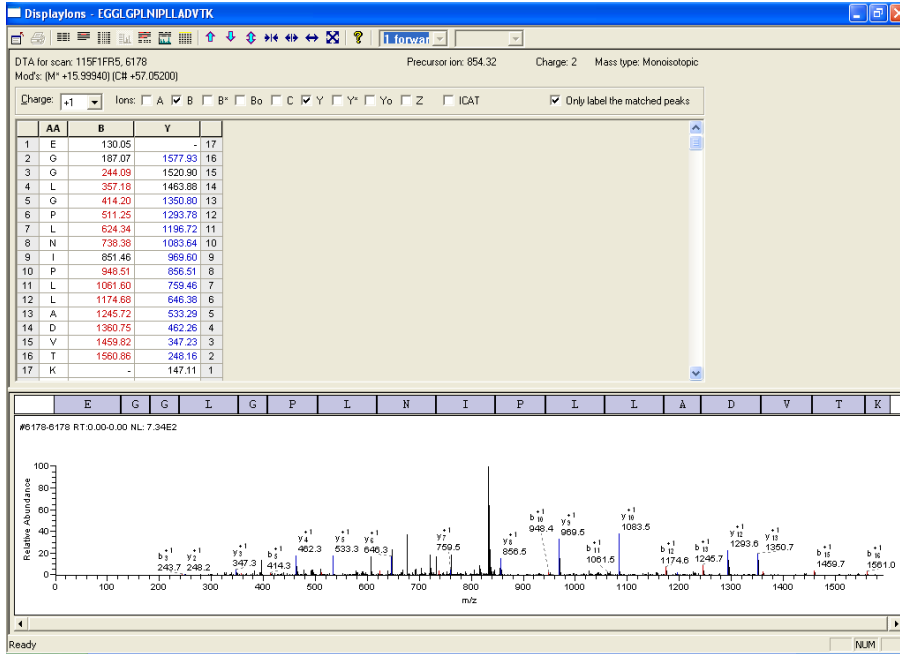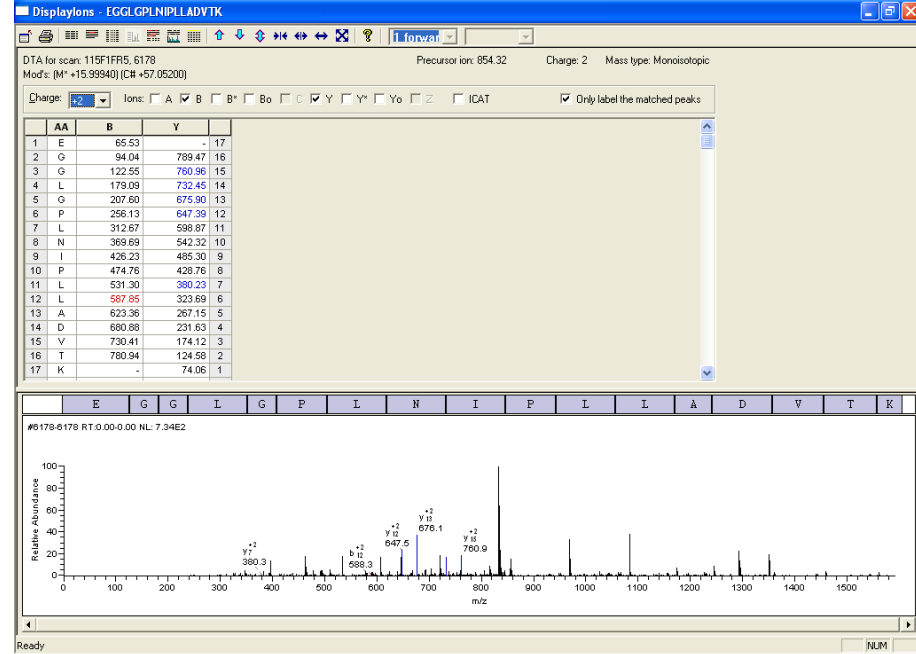

# KEGTGSTATSSGSAGGAVGKG

## IPI00128202.1, IPI00457995.2

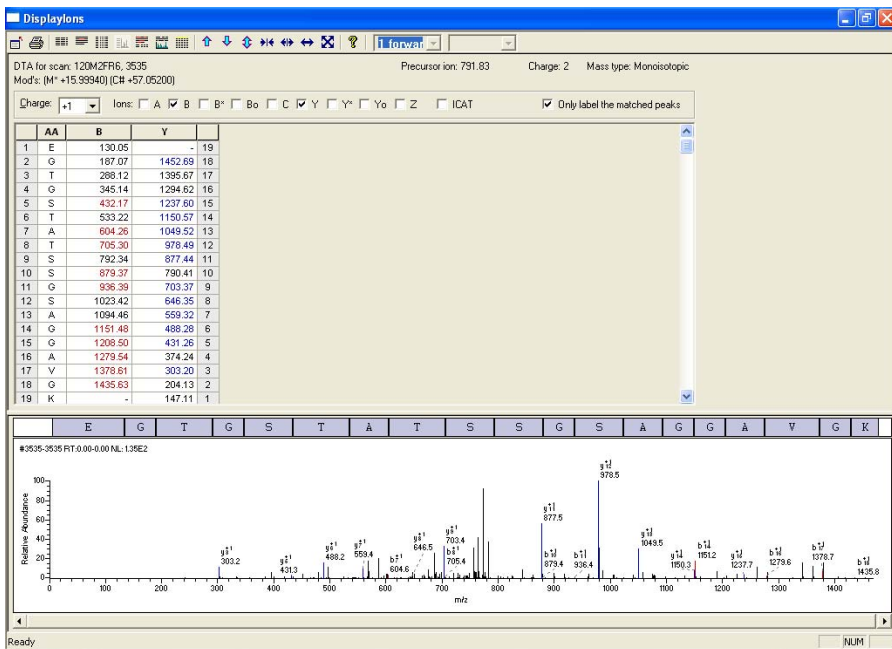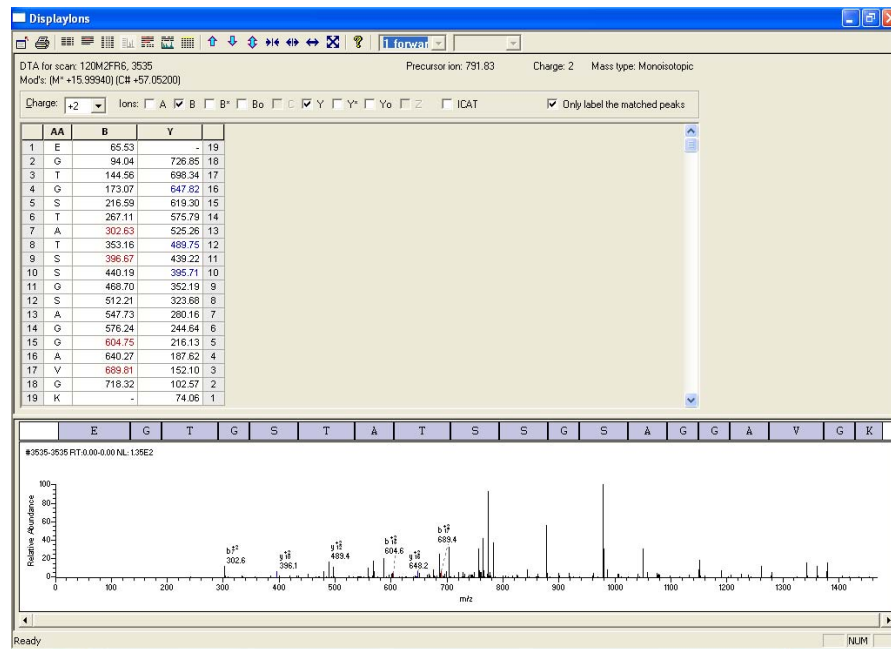

# KELEEEVSNFQKK

IPI00420385.3, IPI00454142.4, IPI00454143.2

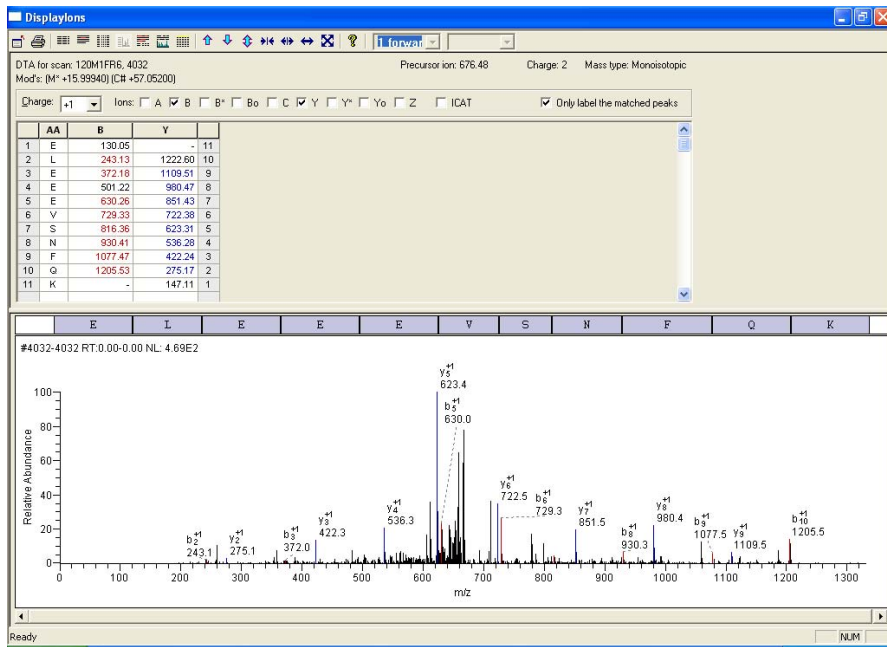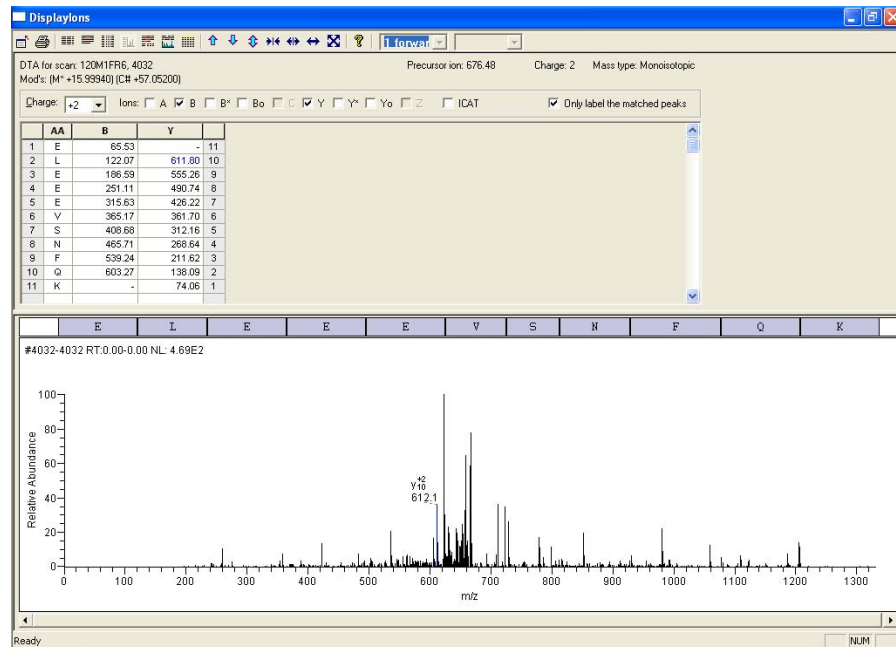

# KELLQPVTISRN IPI00138691.5

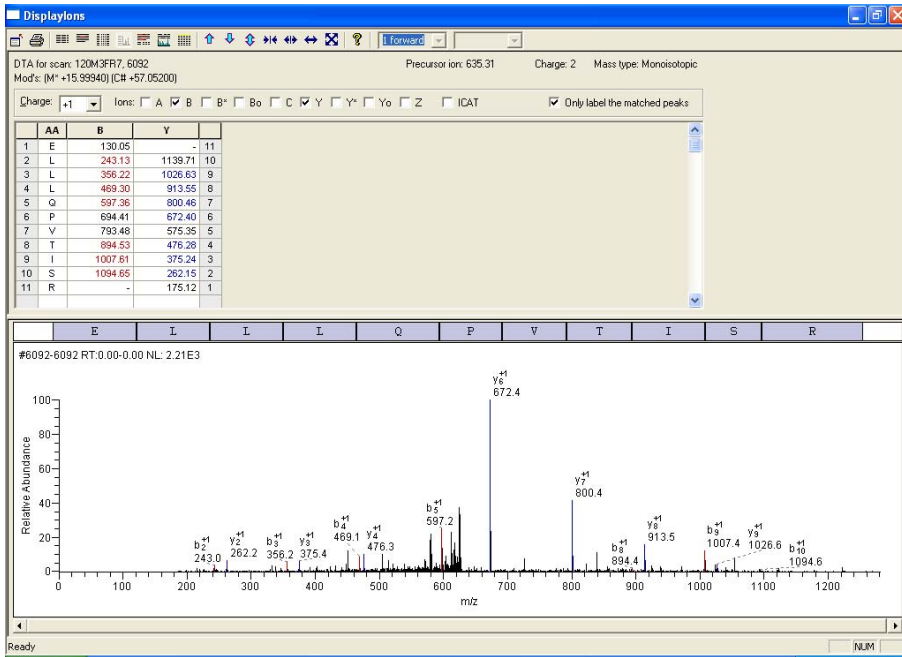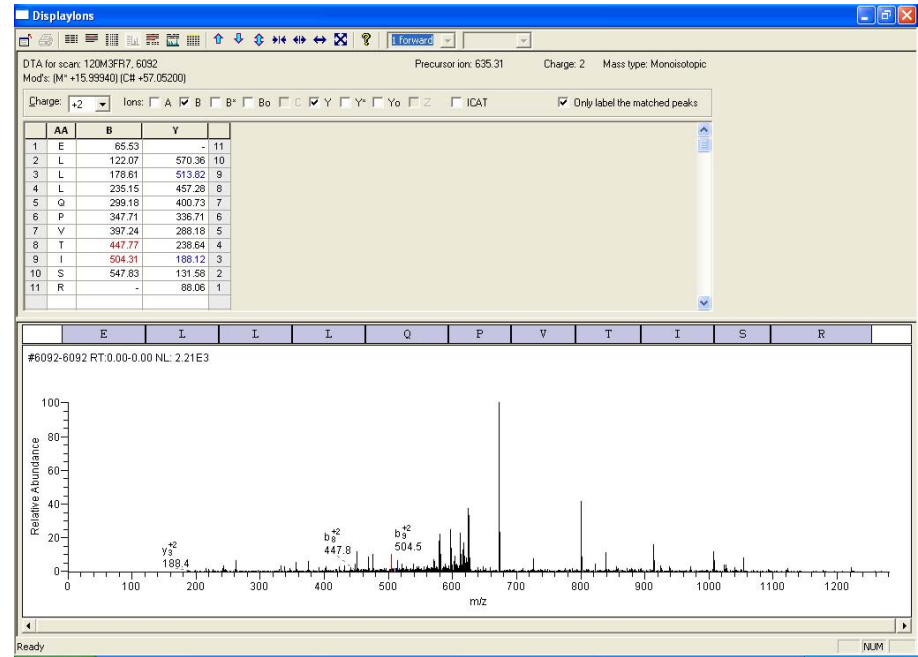



# KEVVEEAENGR

IPI00224784.3, IPI00462306.4, IPI00620272.3, IPI00625445.3, IPI00625829.1,  
IPI00670507.1

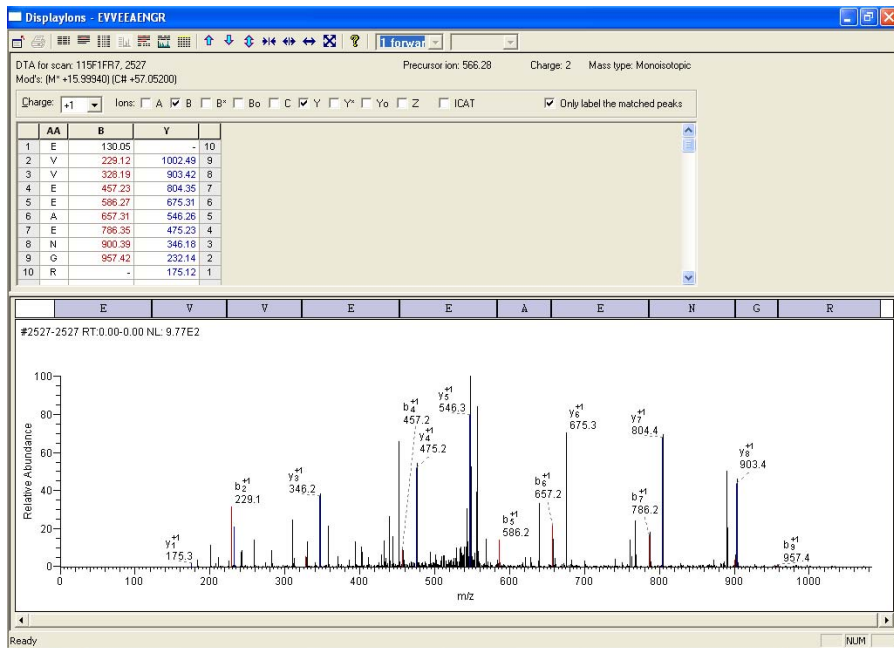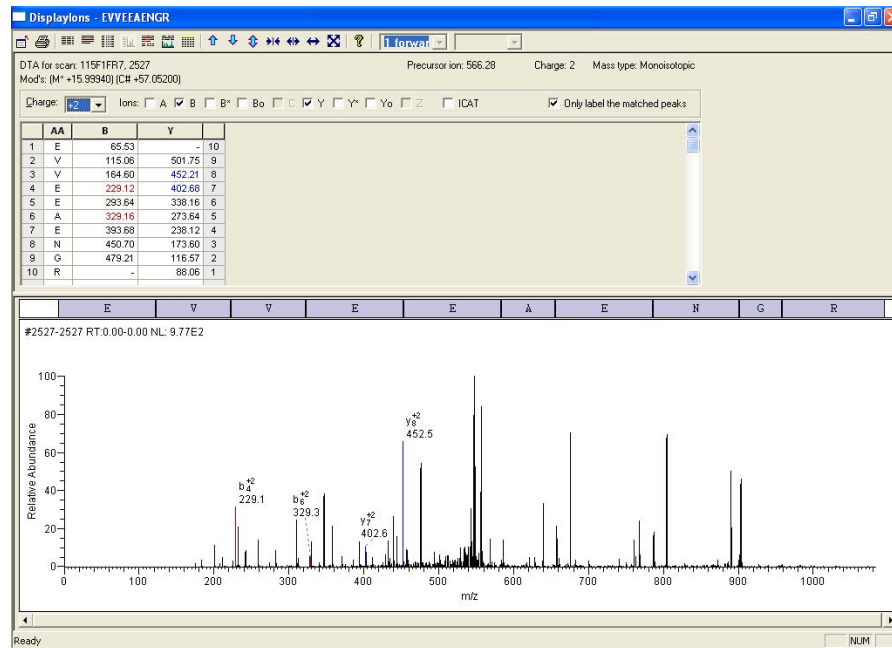

# KFEDGDLTYQSNAILRH

## IPI00283531.7, IPI00408829.4

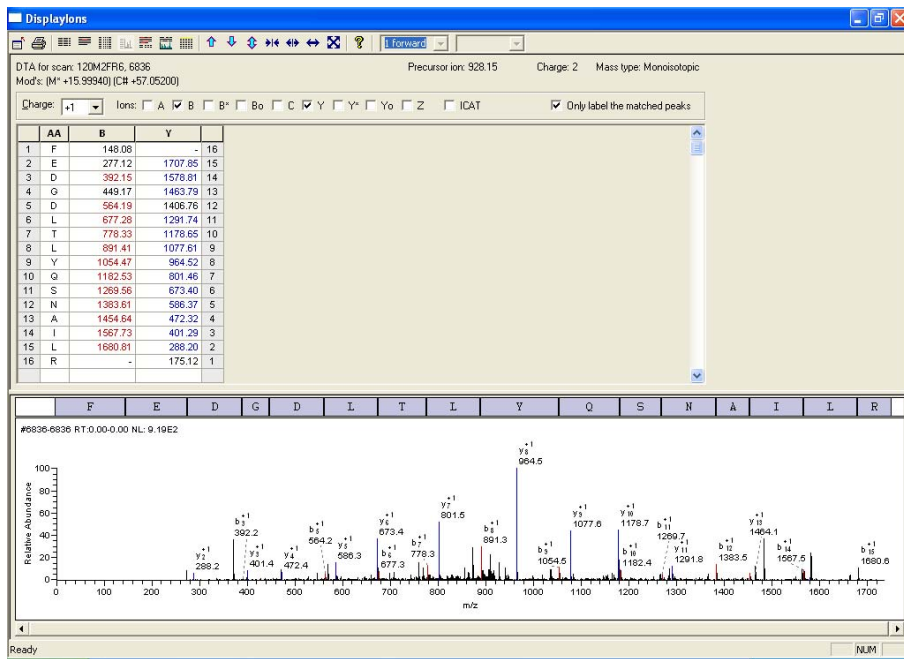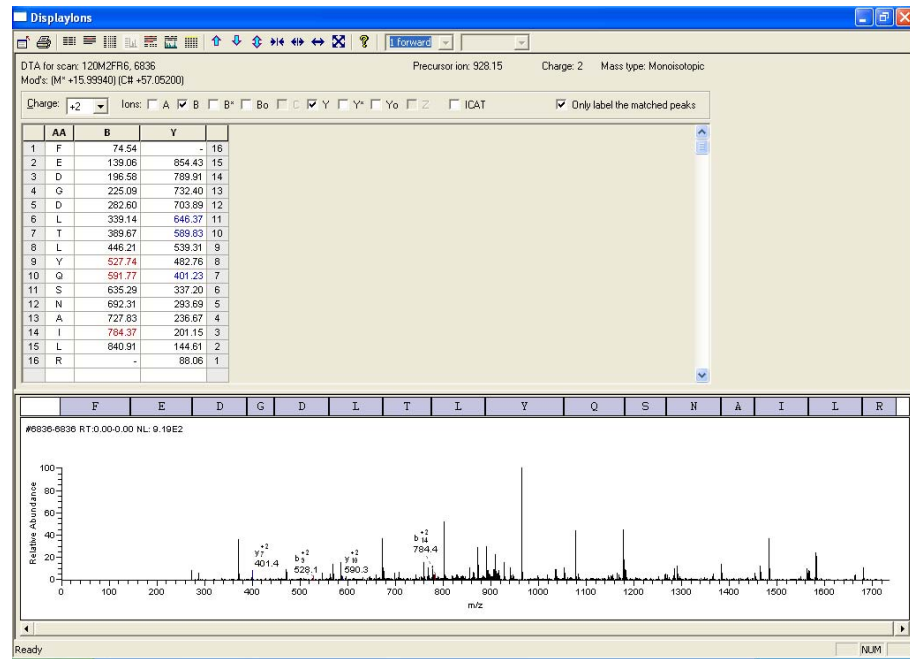

# KFITHAPPGEFNEVFNDVRL IPI00330063.5, IPI00653841.1

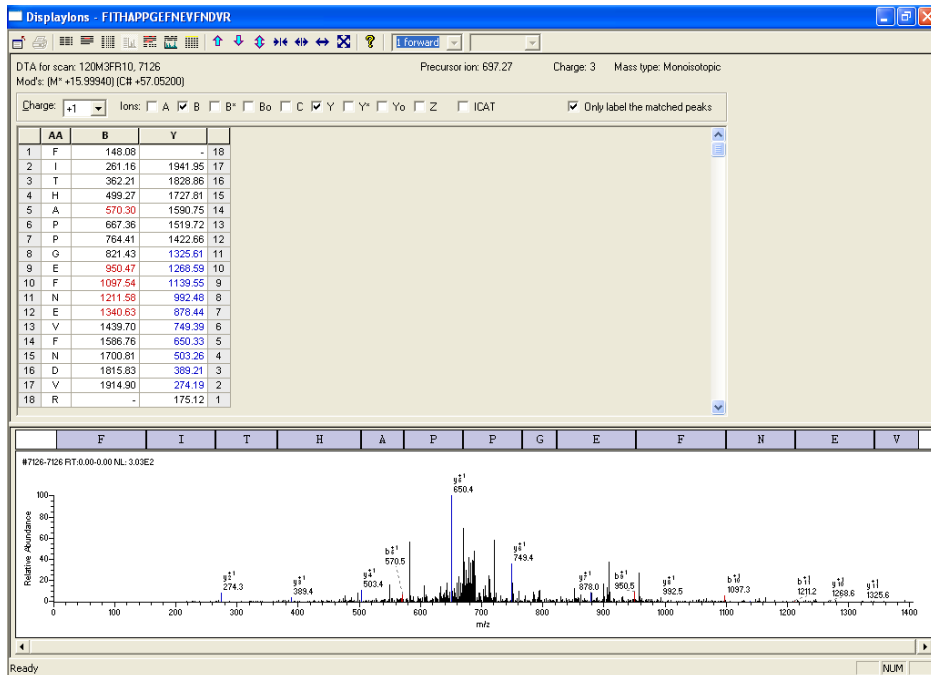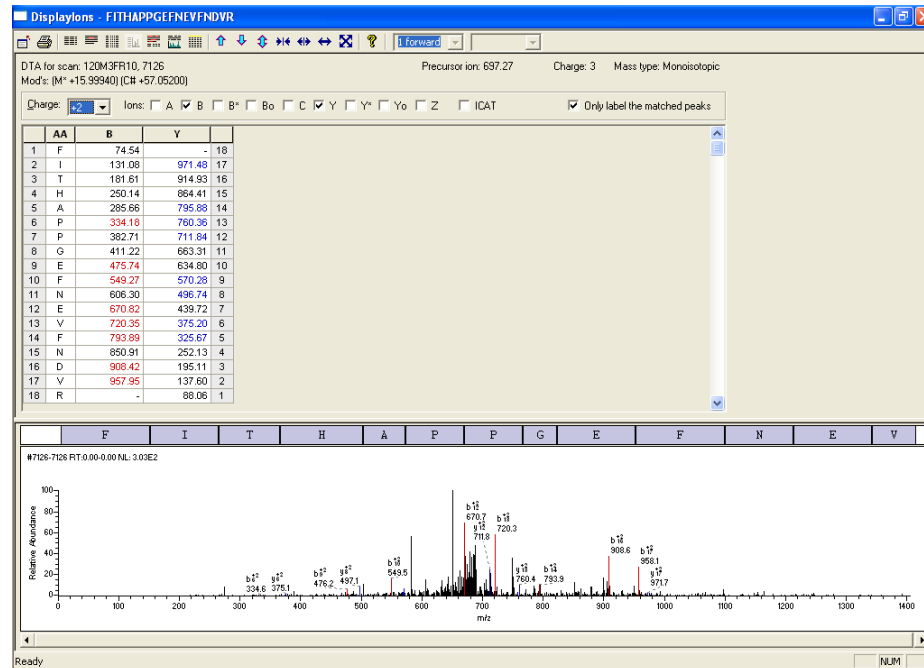

# KFITHAPPGEFNEVFNDVRL IPI00330063.5, IPI00653841.1

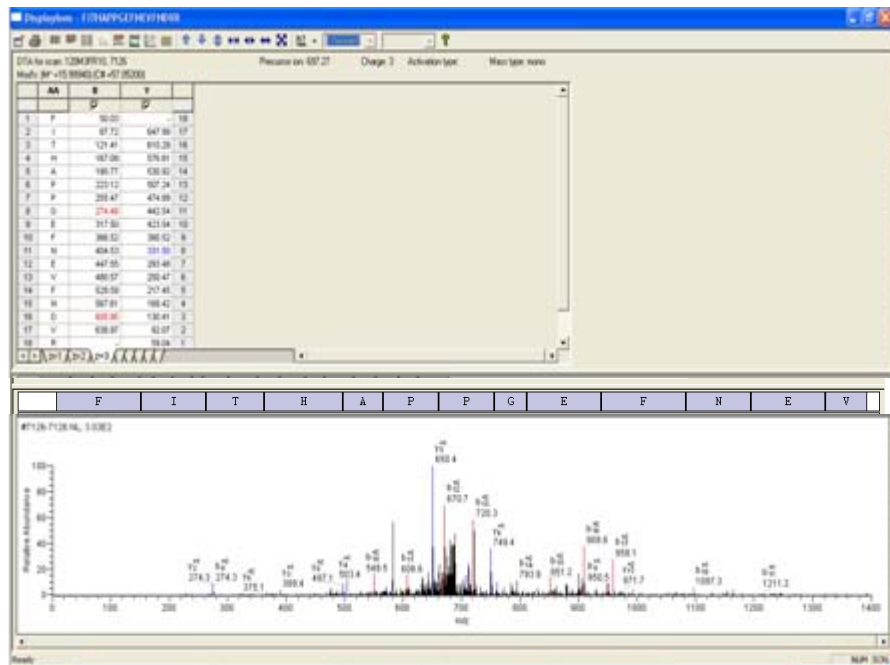

# KFSLVDLAGNERG

IPI00123365.1, IPI00350032.2, IPI00648327.1, IPI00667340.2

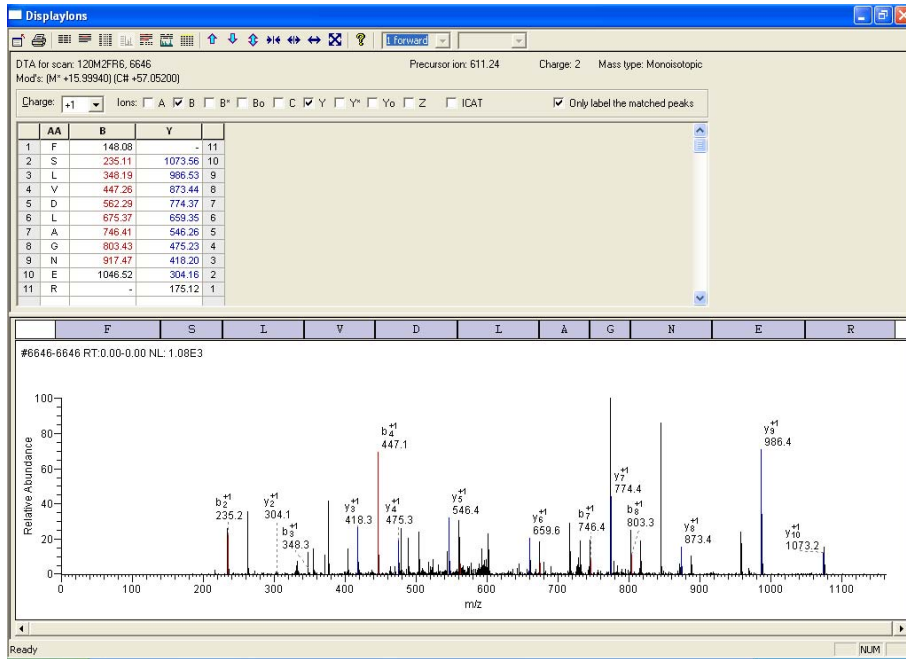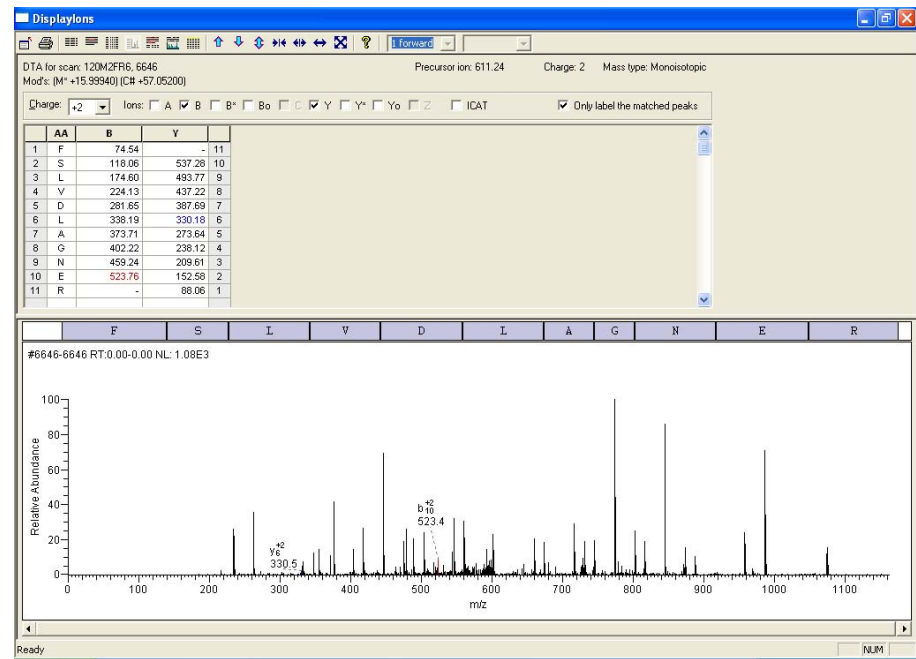

# KGAEADQIIIEYLKQ IPI00132194.3

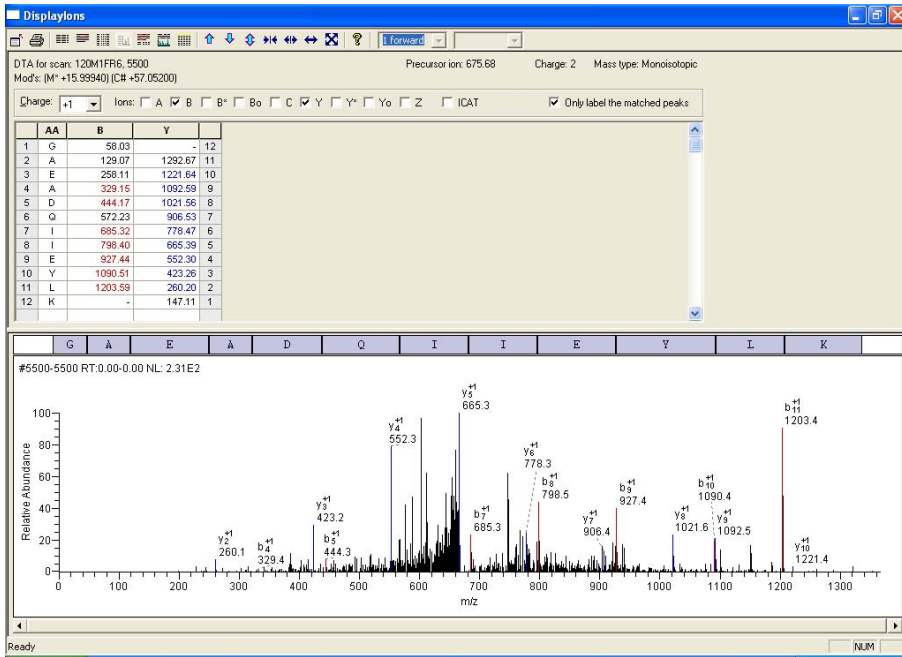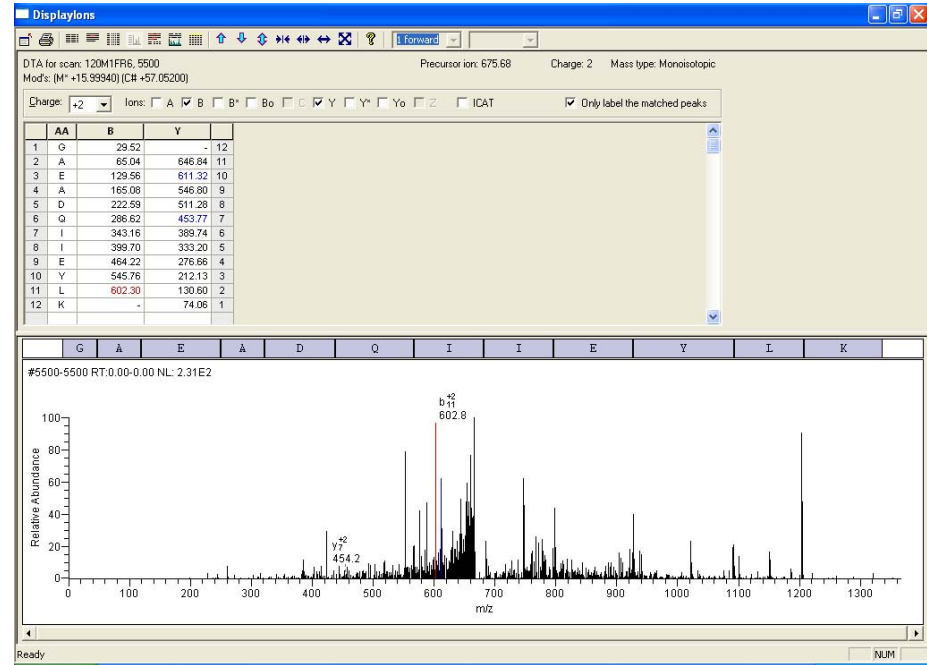

# KGAVDGGLSIPHSTKR

IPI00308706.3, IPI00469084.5, IPI00750357.1, IPI00762217.1

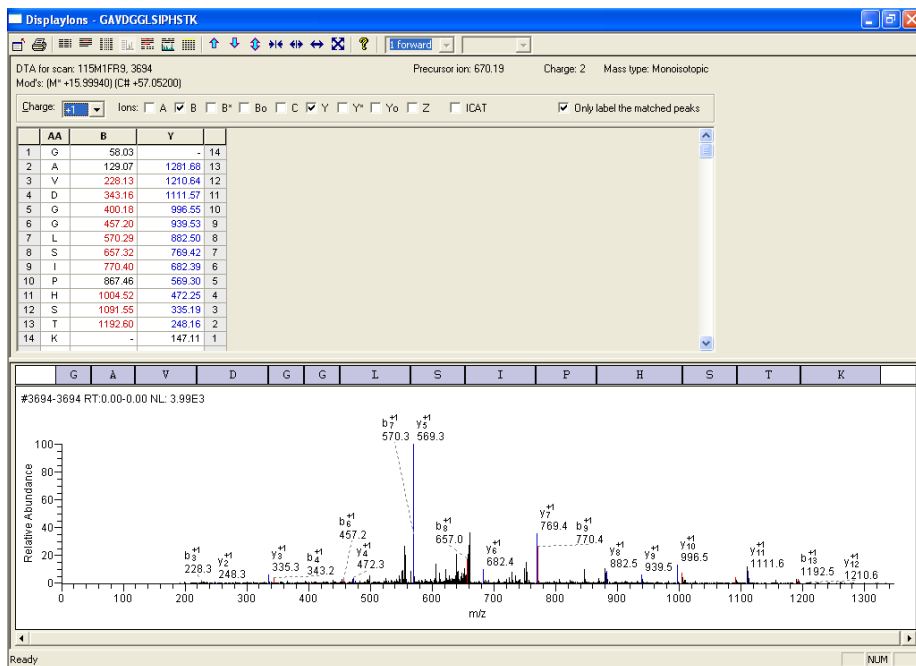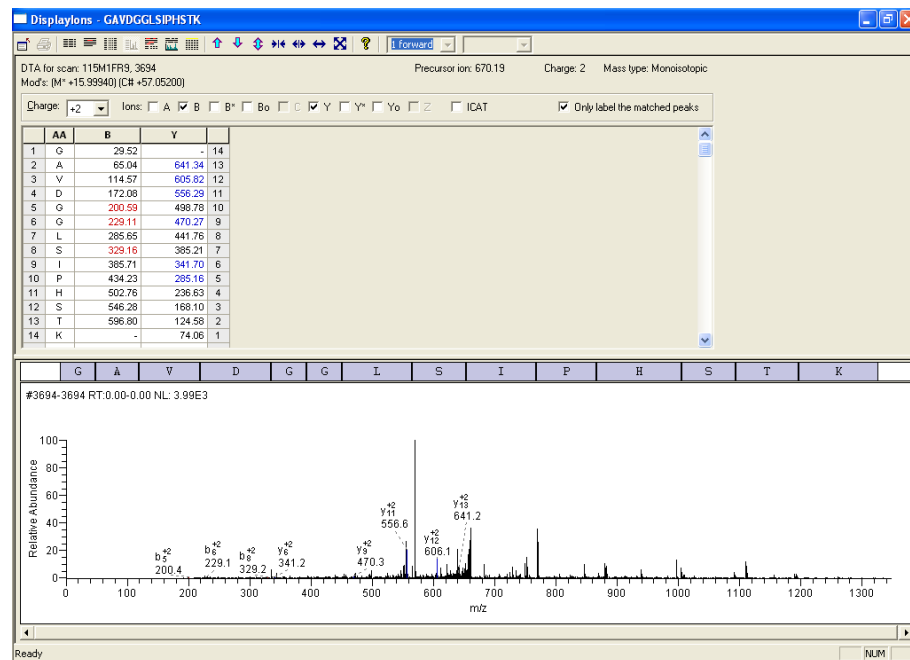

# KG DATVSYEDPPTAKA

IPI00322492.3, IPI00515199.1, IPI00667481.2, IPI00742310.3, IPI00757622.1

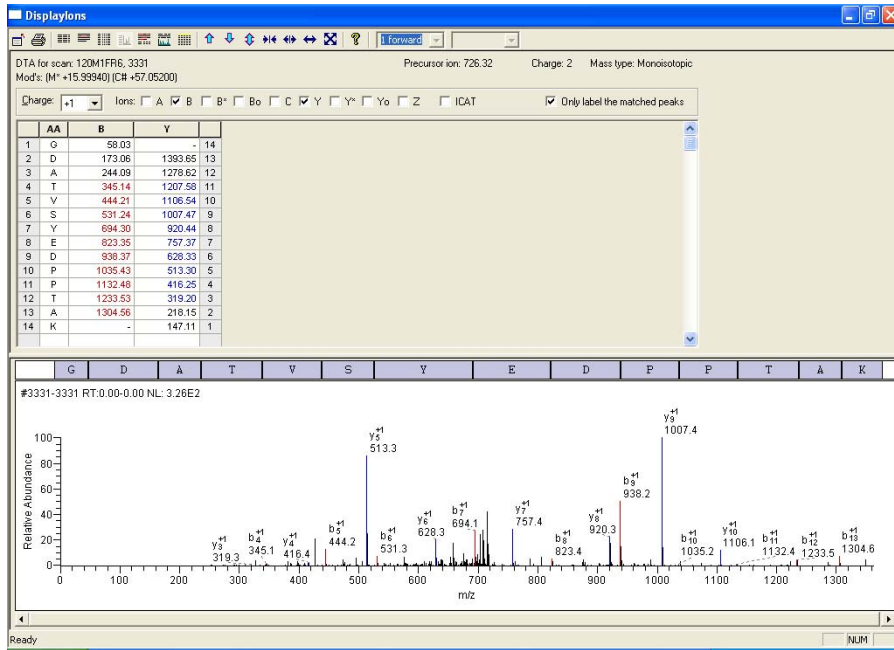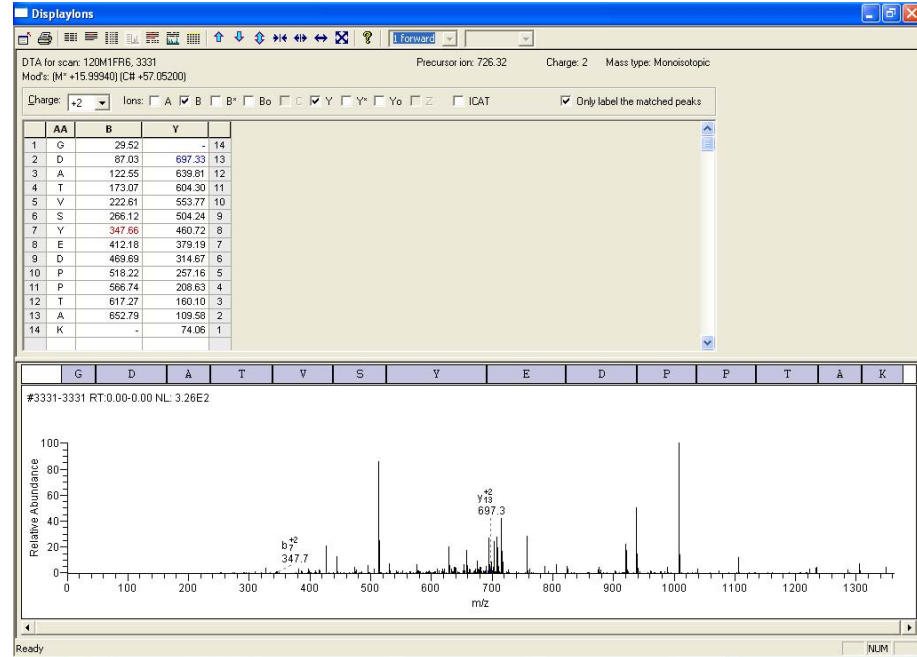



# KGDVTTQVALQPALKF IPI00109109.1

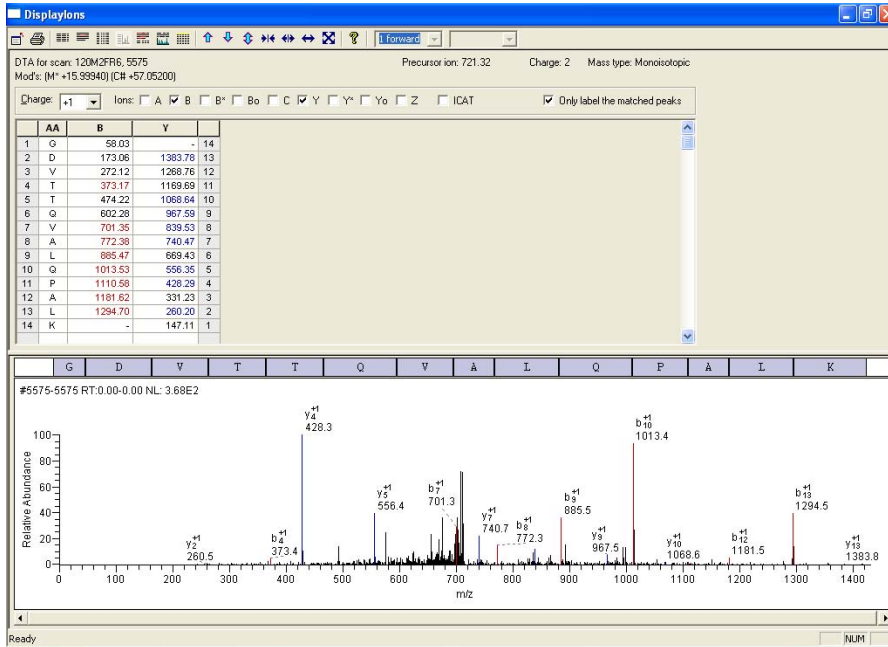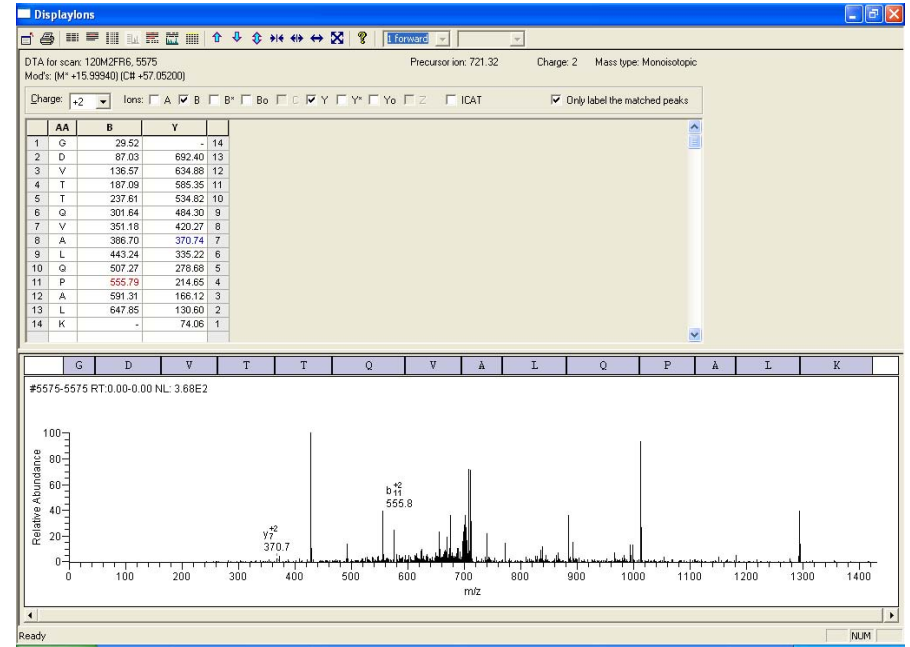

# KGLAITFVSDENDAKI IPI00409462.2

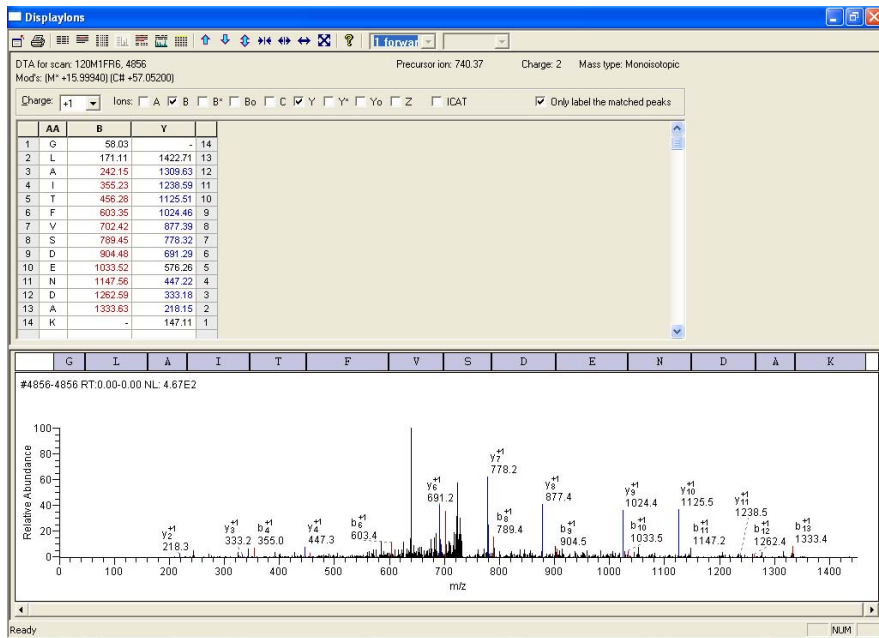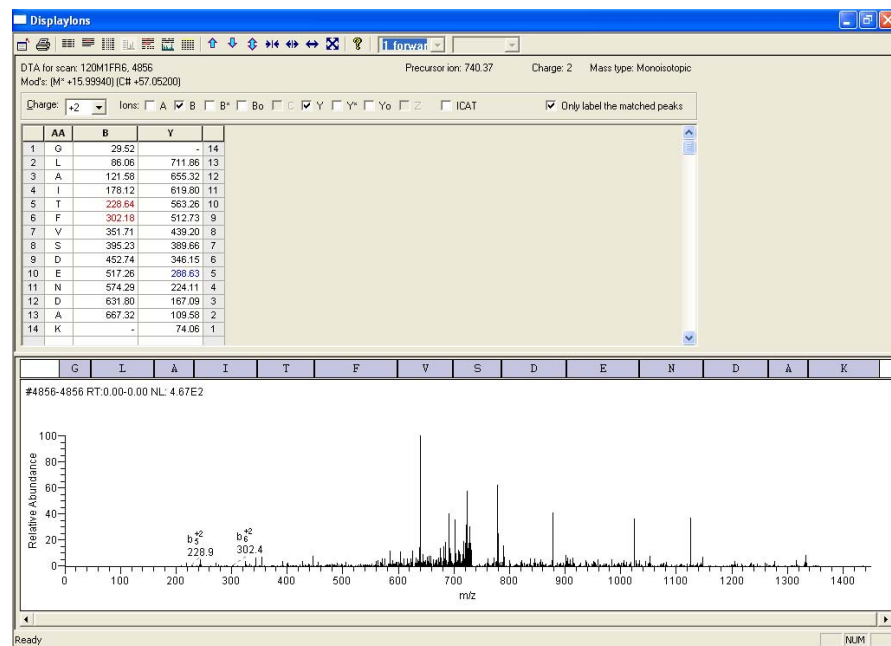

# KGLAVTFVSDENDAKI IPI00123878.4, IPI00553461.1

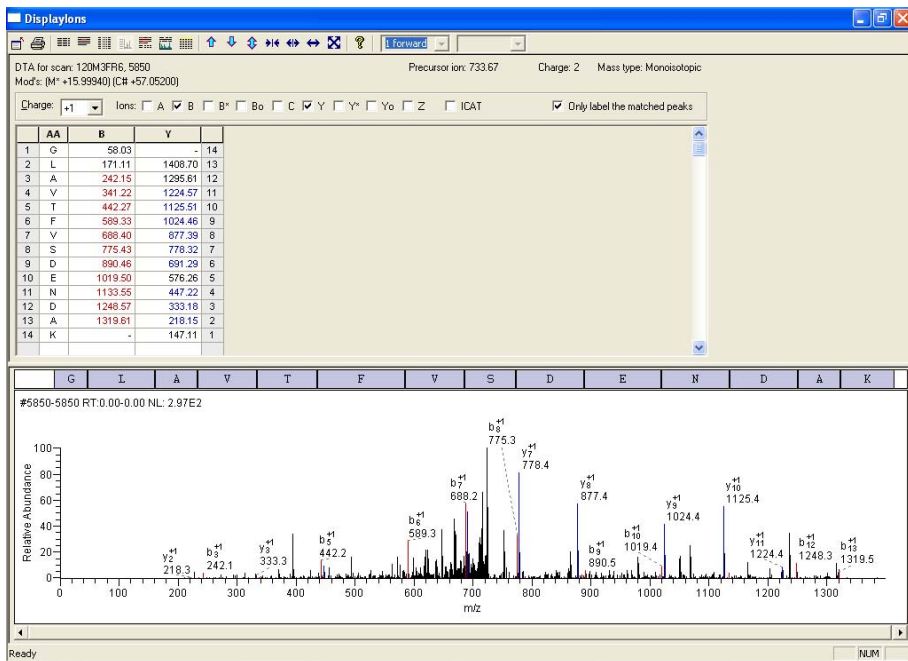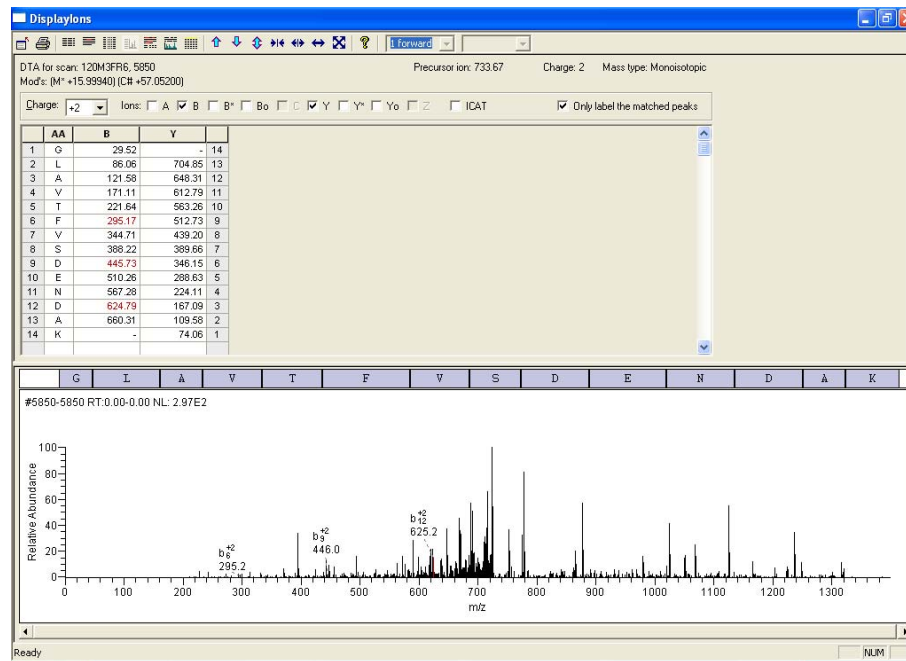

# KGLETIASDVVSLASKA IPI00153660.4

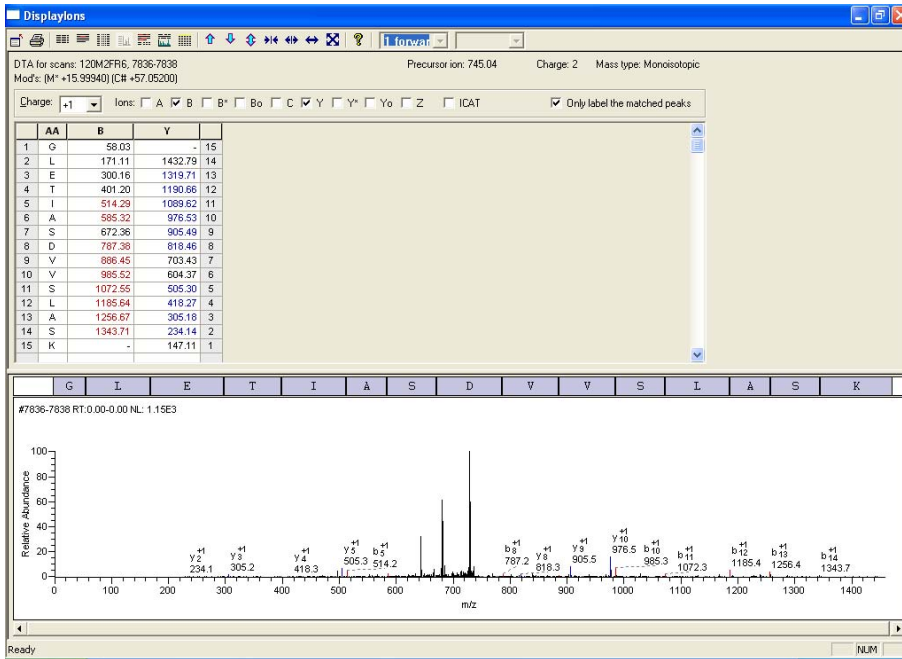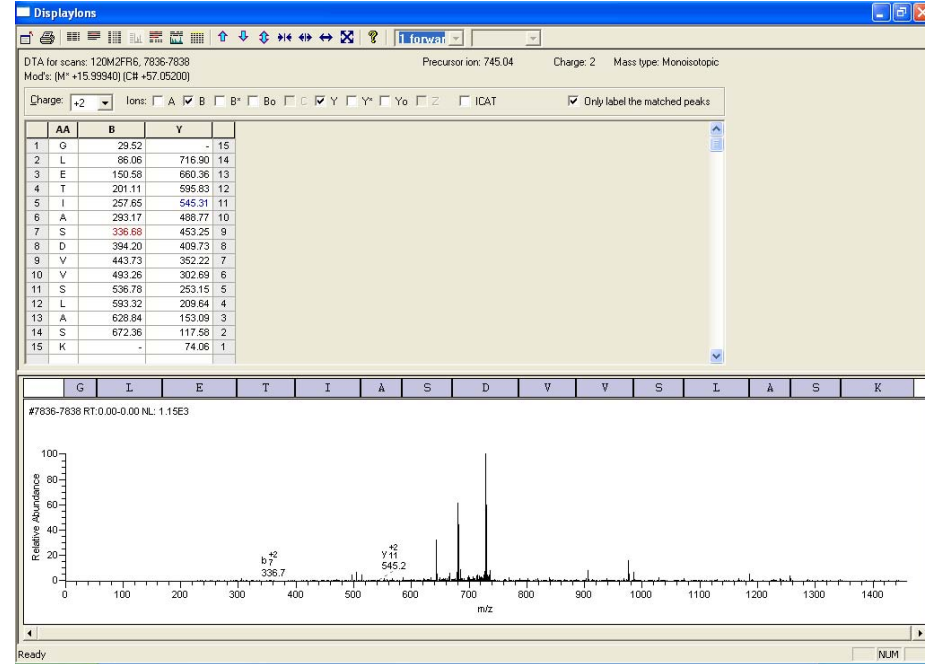

# KGPLQSVQVFGGRK

## IPI00469918.4, IPI00755046.1

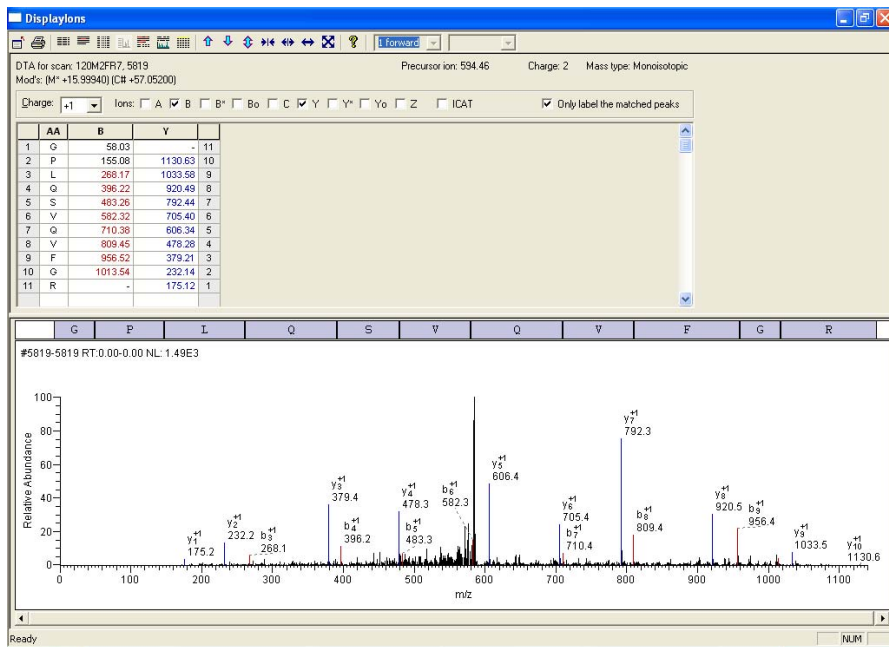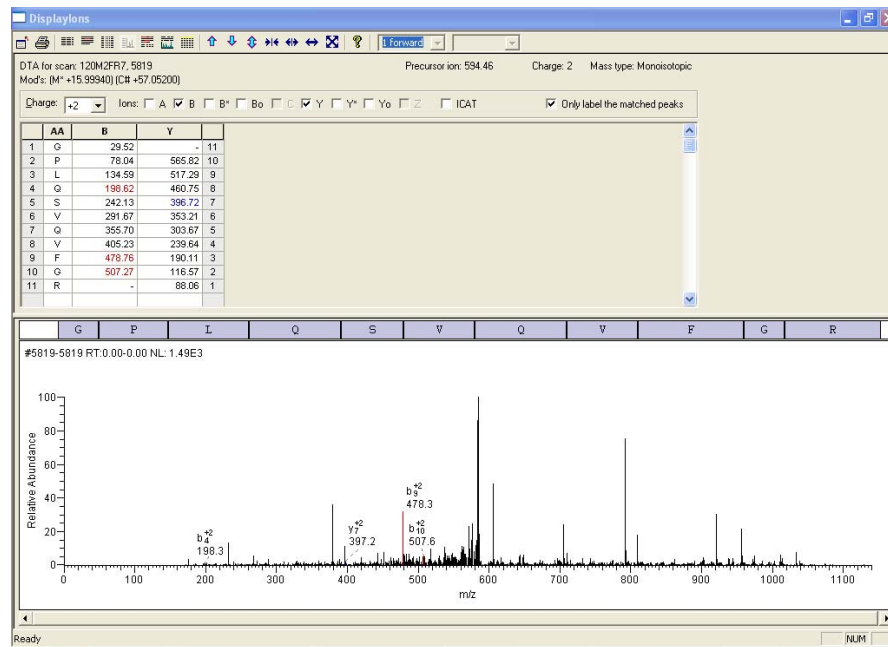

# KSGEEEEIDIMELLKN

IPI00604969.3, IPI00750701.1, IPI00750829.1, IPI00756257.1

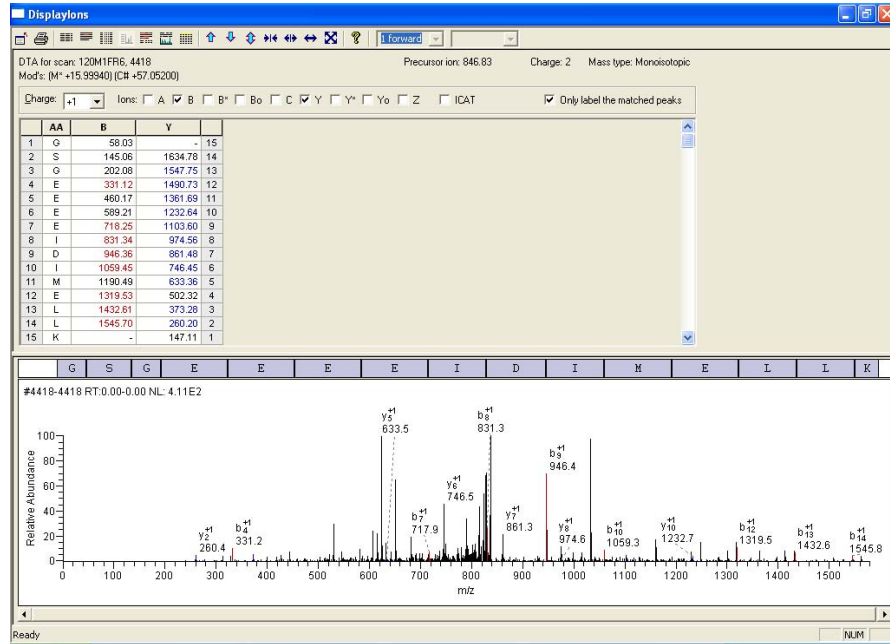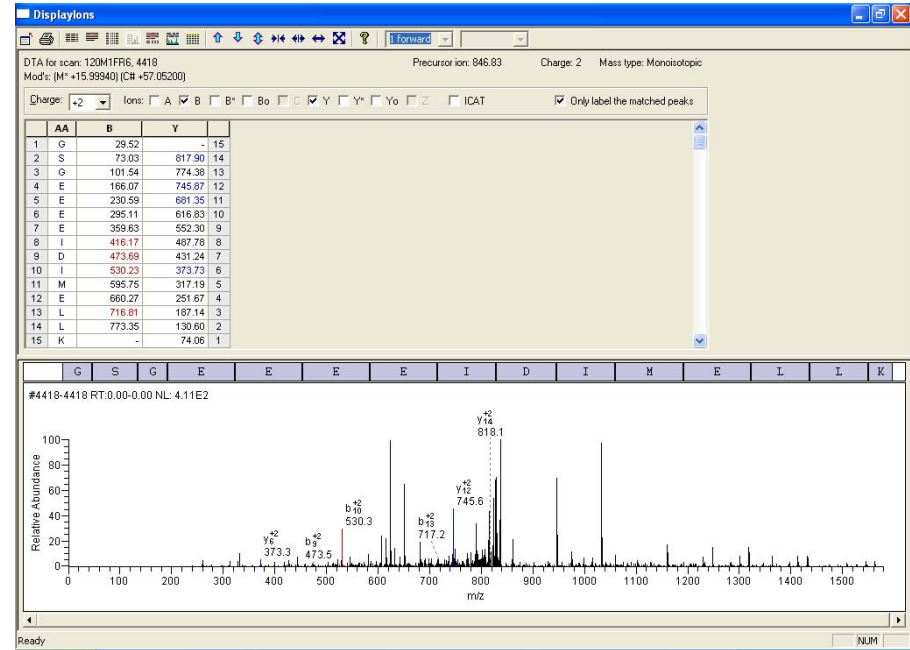

# KGTLISSEEGETEANNPKK IPI00130173.1

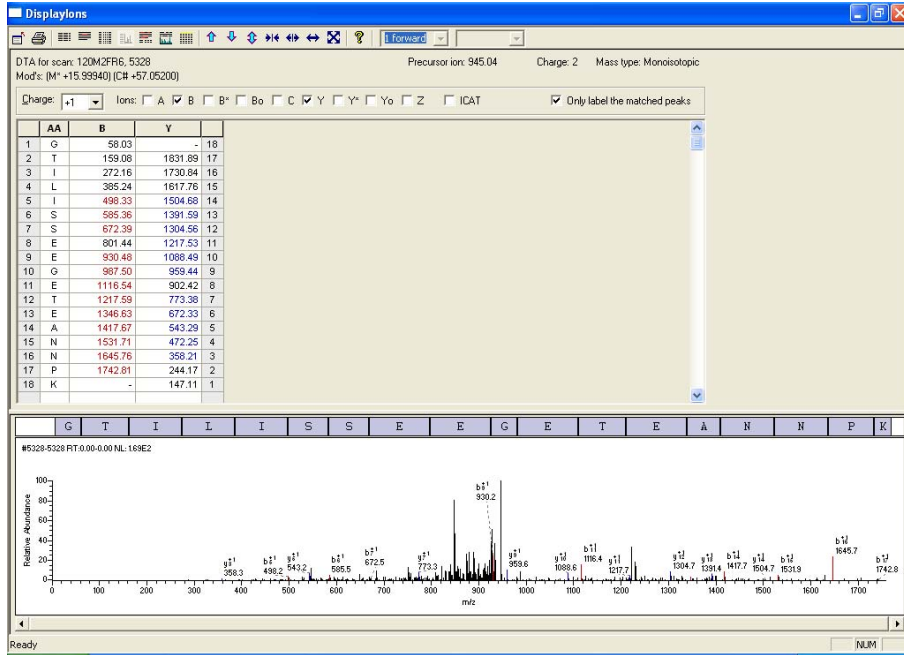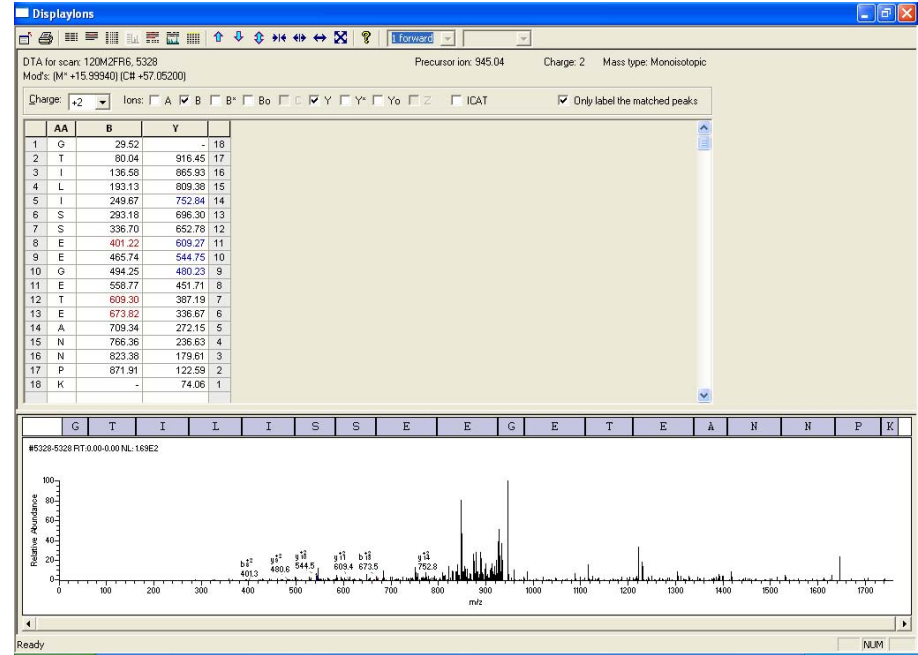

# KGVDVIAQAQSGTGKT

IPI00118676.3, IPI00400432.2, IPI00409918.1, IPI00462110.1, IPI00761992.1

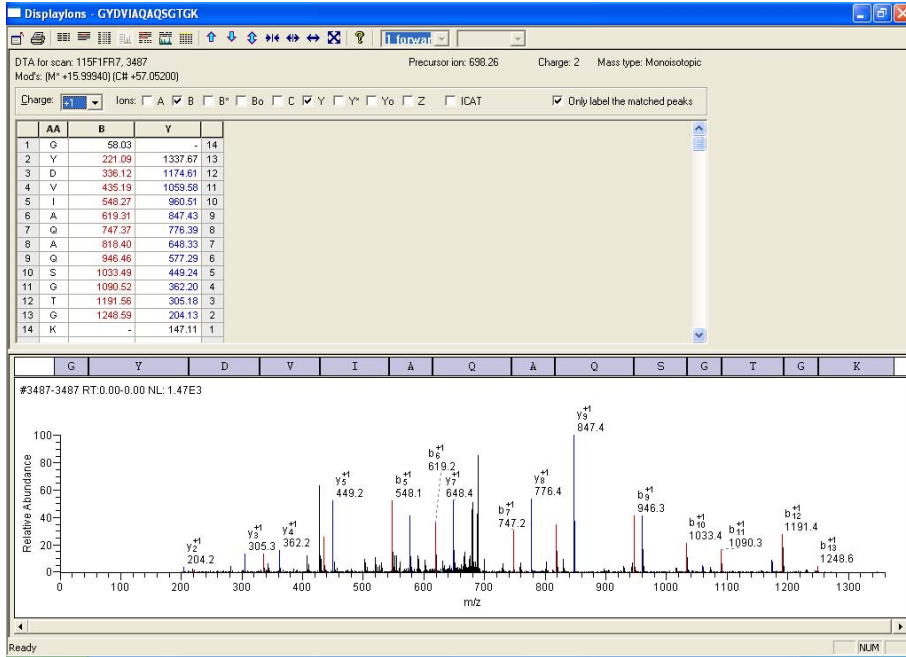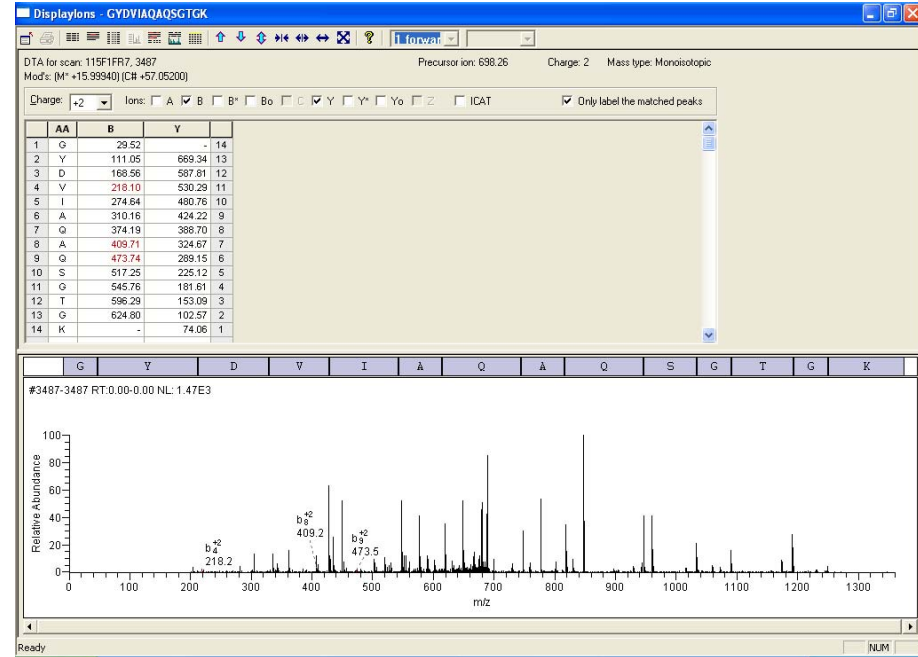



# KHNNQQALSHSIEEGLKI IPI00133880.2

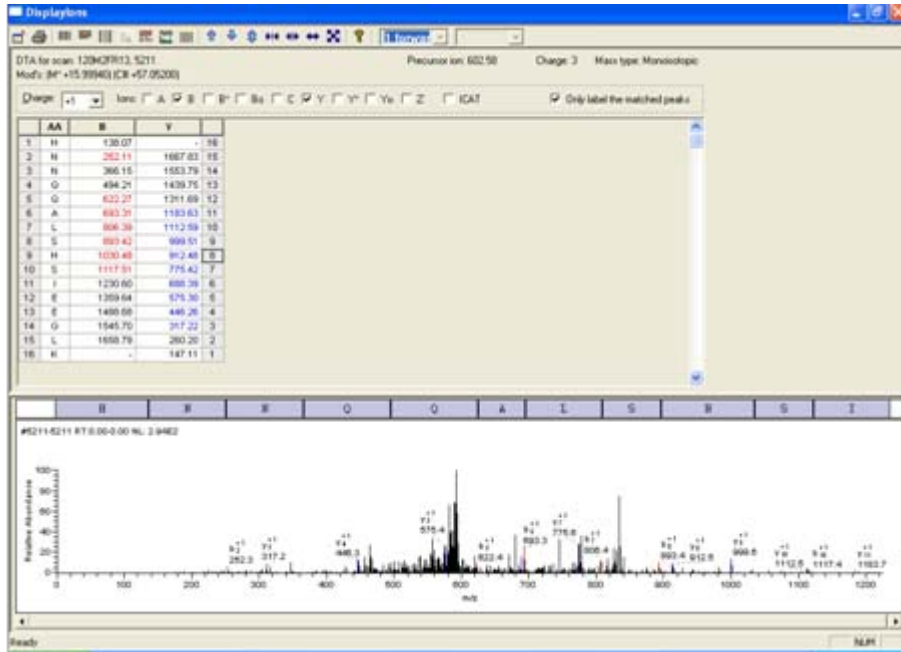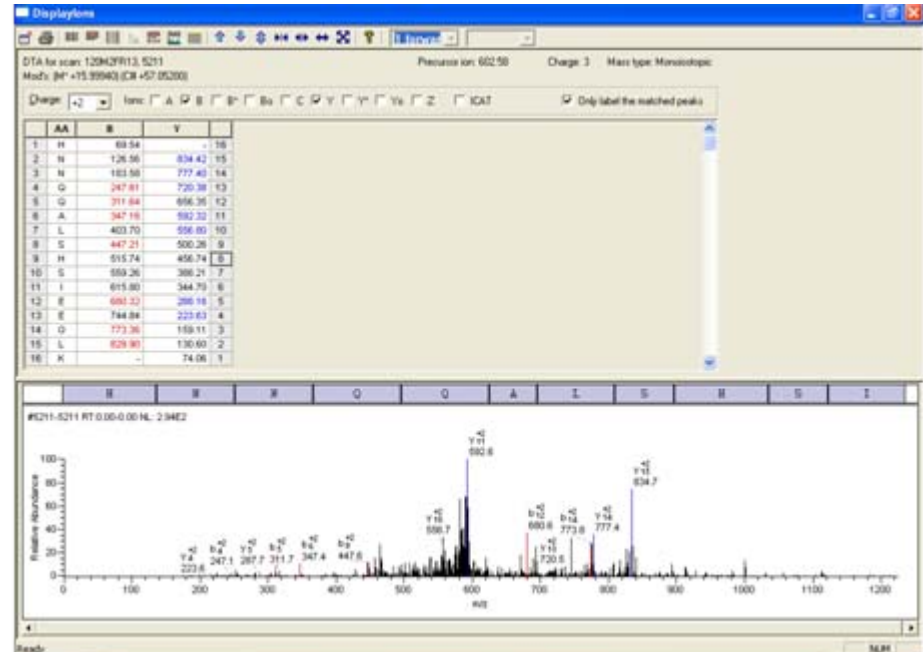

KHNNQQALSHSIEEGLKI  
IPI00133880.2

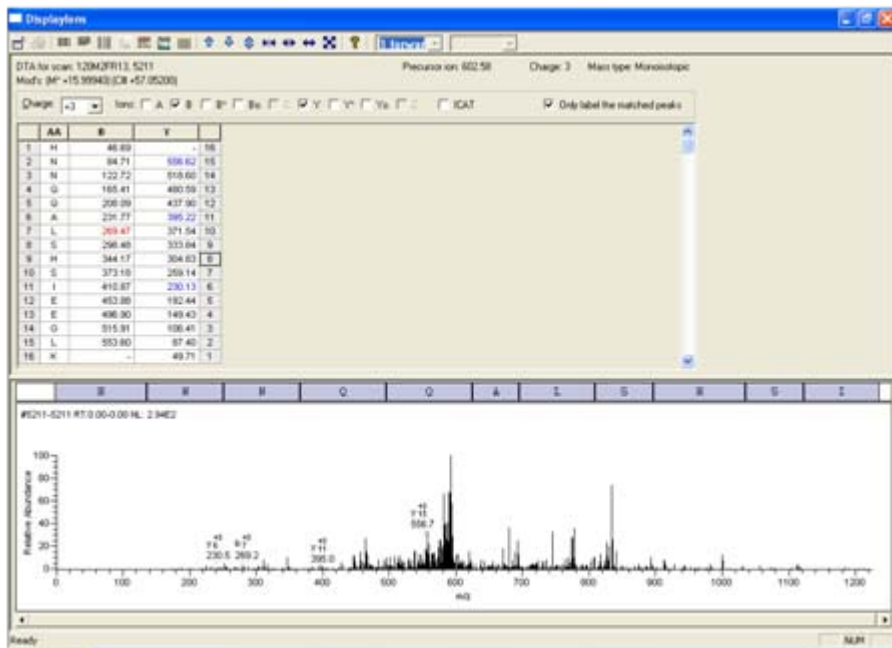

# KIAQLEEQLDNETKE IPI00123181.2

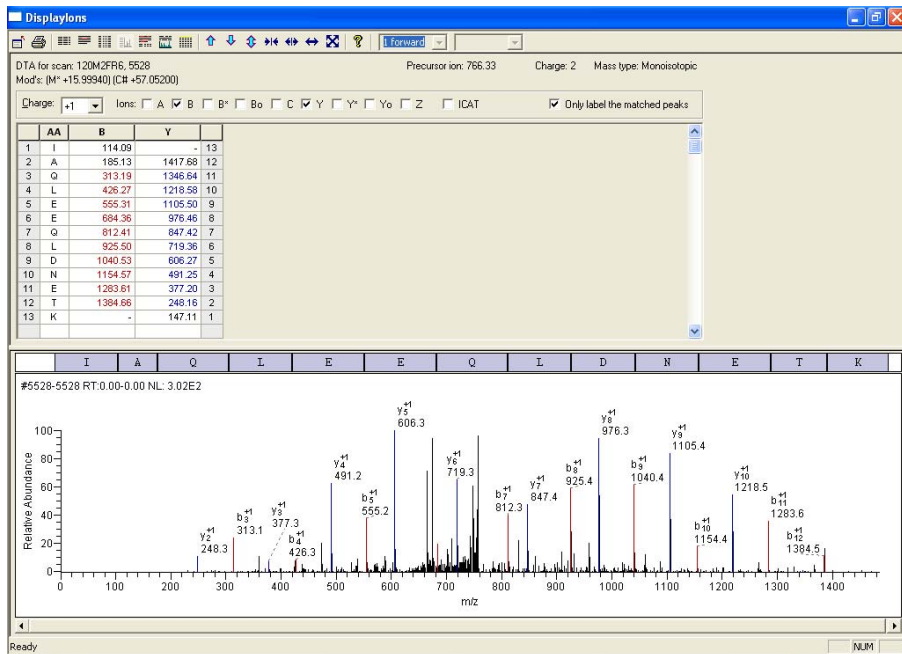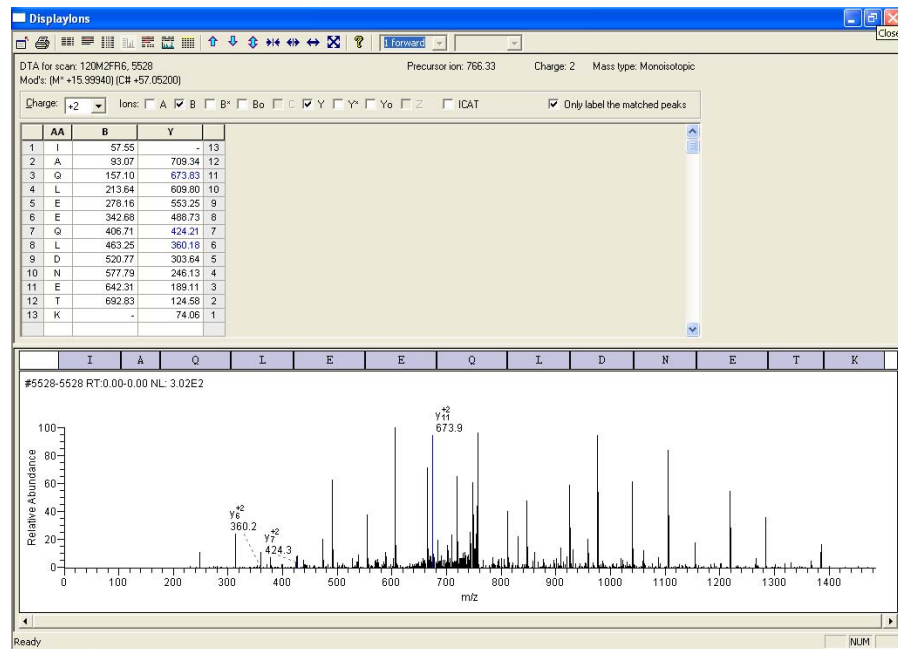

# KIFVGGLNPEATEEKI

IPI00117288.3, IPI00277066.4, IPI00648228.3

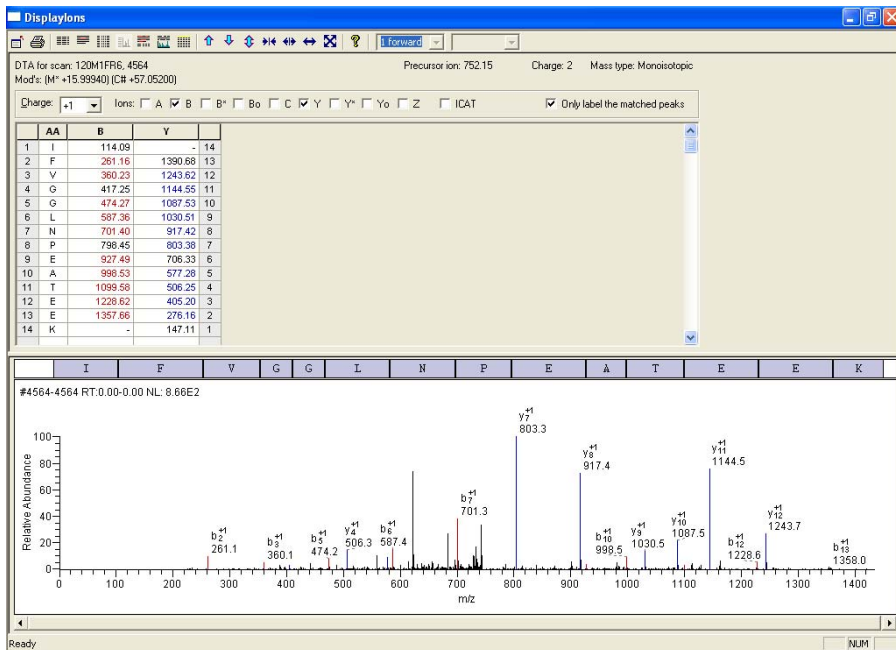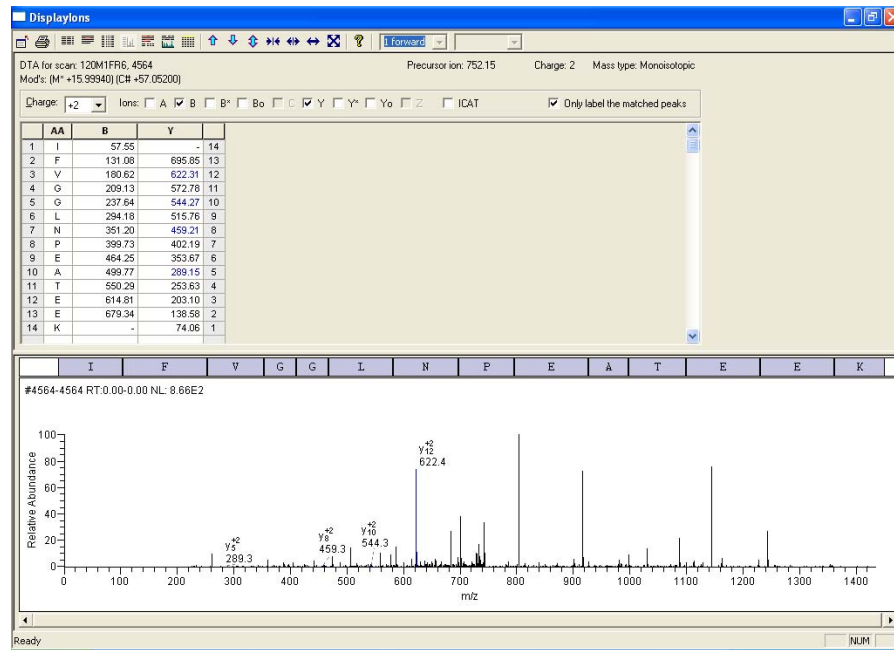

# KIFVGGLSPDTPEEKI

IPI00230086.2, IPI00330958.2, IPI00336873.1, IPI00336874.1

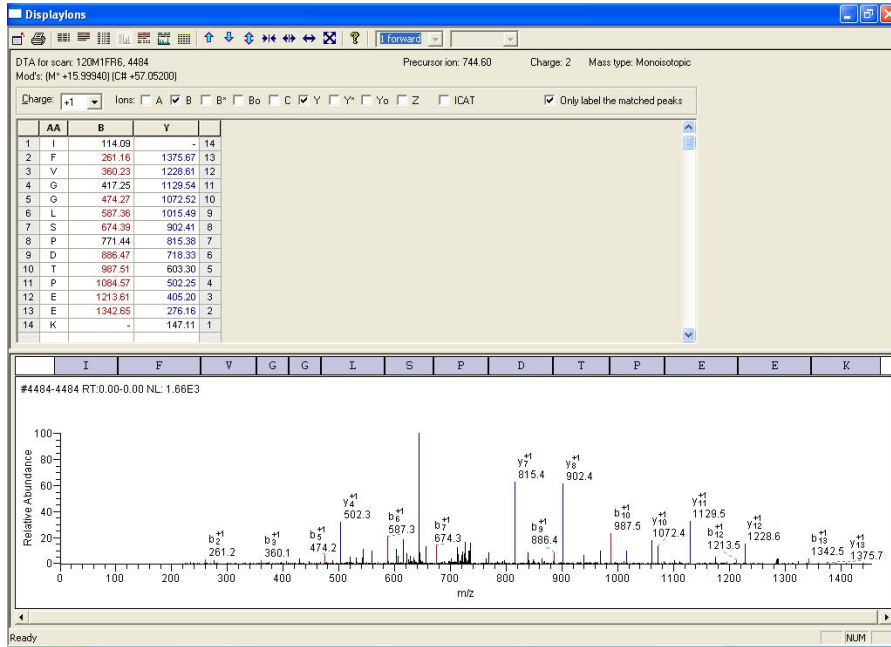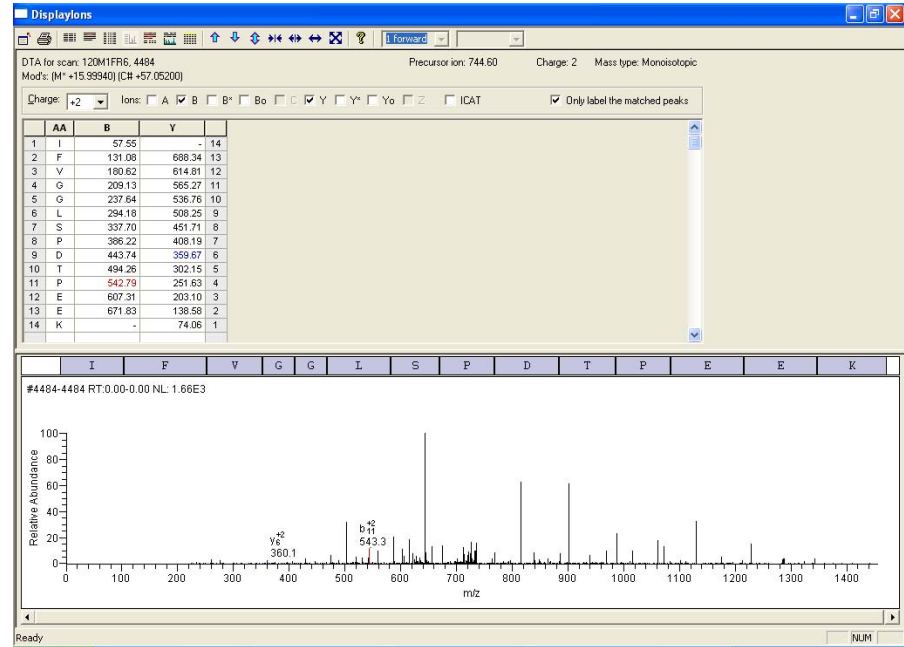

# KIGIIGGTGLDDPEILEGRT IPI00132096.3

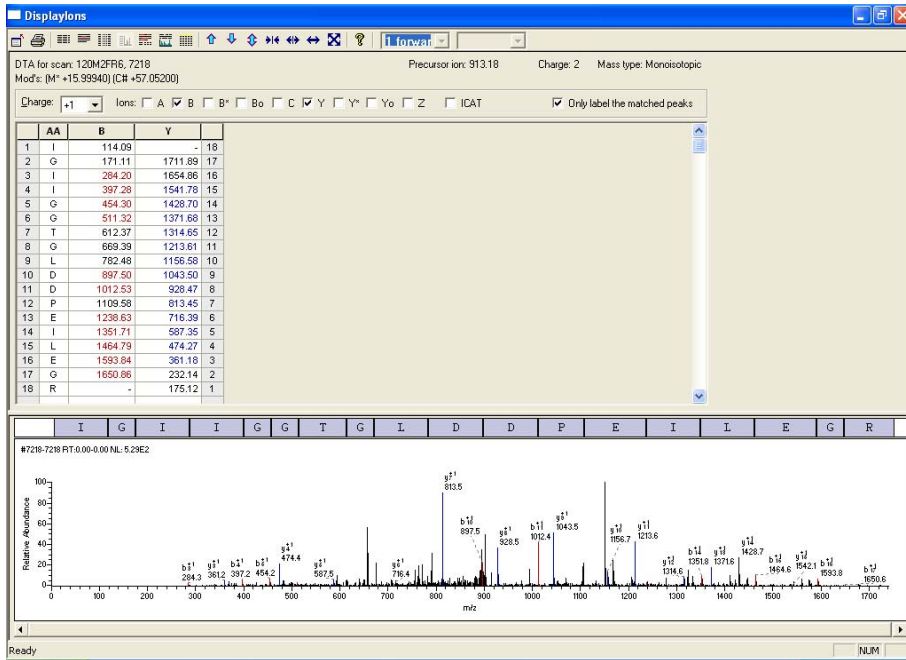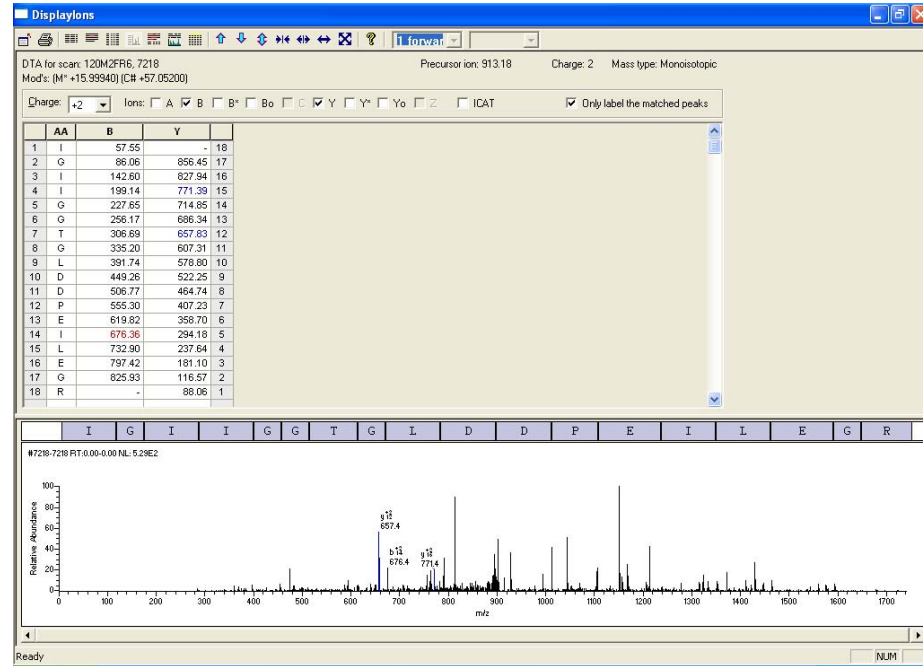

# KIIQLLDDYPKC

IPI00314950.2, IPI00457715.5, IPI00605765.3, IPI00626366.3, IPI00626504.2,  
IPI00626841.3, IPI00752782.1

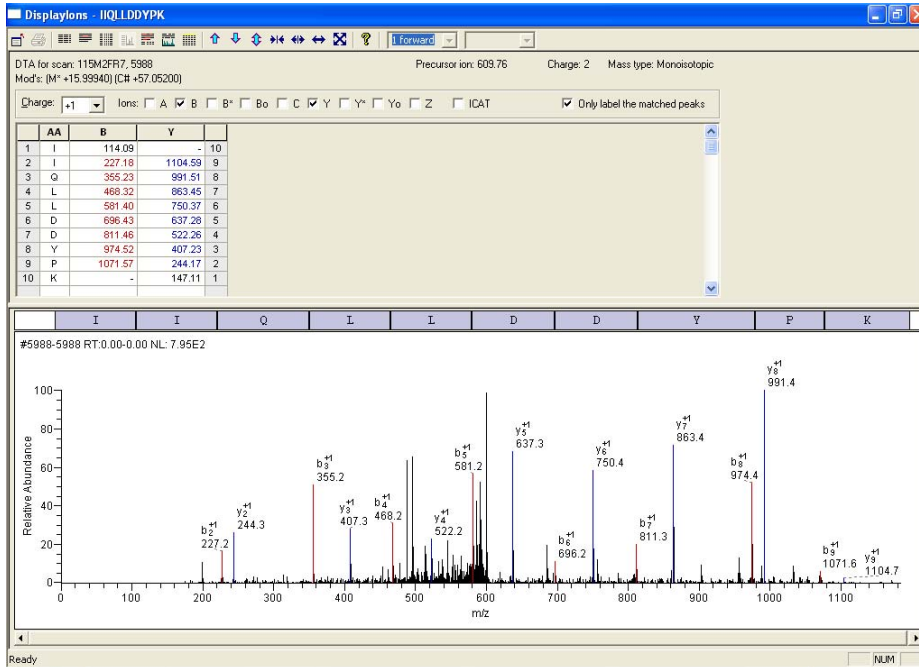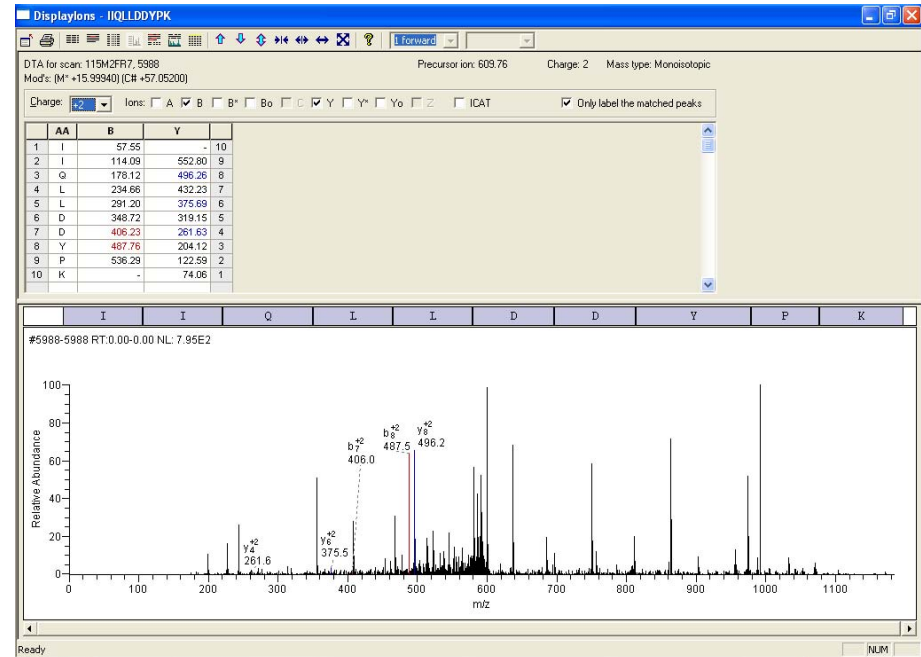

# KIKGEHPGLSIGDVAKK

IPI00355265.3, IPI00420261.4, IPI00458851.1, IPI00462121.1, IPI00553608.1,  
 IPI00554889.1, IPI00621065.4, IPI00623111.3, IPI00623466.2, IPI00661255.1,  
 IPI00665601.1, IPI00673217.4, IPI00756759.1, IPI00756864.2, IPI00761360.1,  
 IPI00761560.1

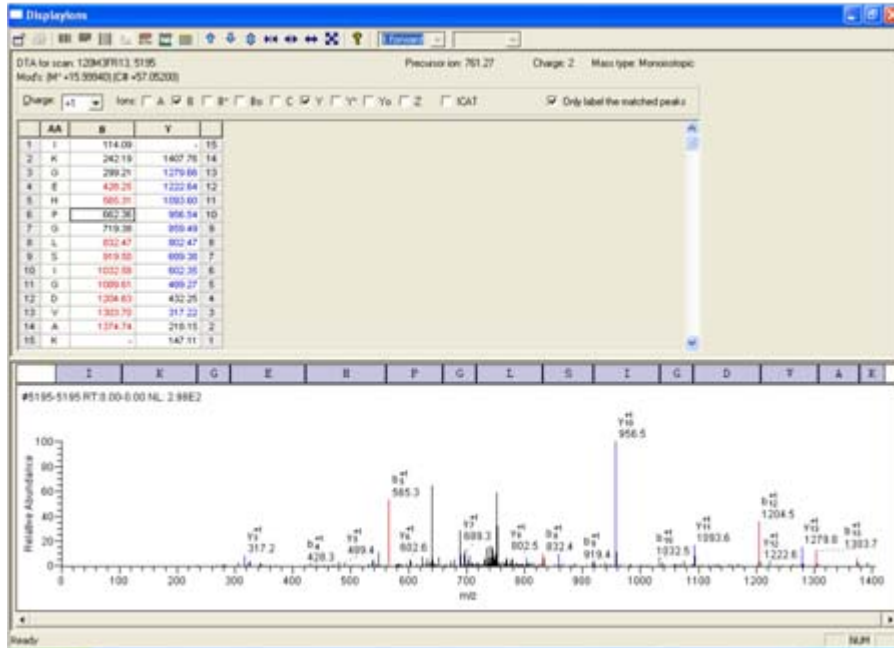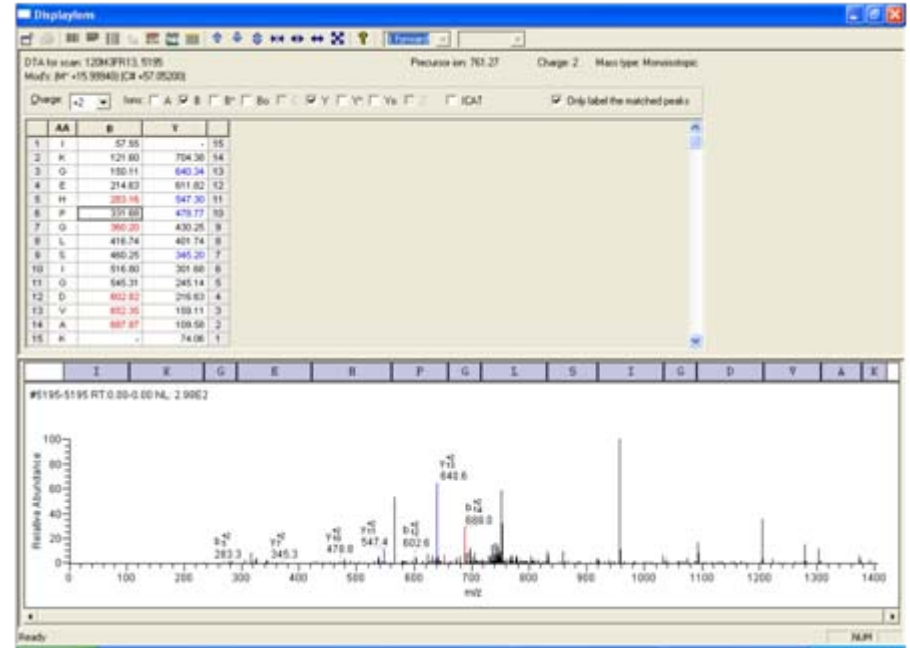



# KIKIEHPGLSIGDTAKK

IPI00462291.4, IPI00620283.4, IPI00750182.1, IPI00750359.1, IPI00751649.1,  
IPI00753253.1

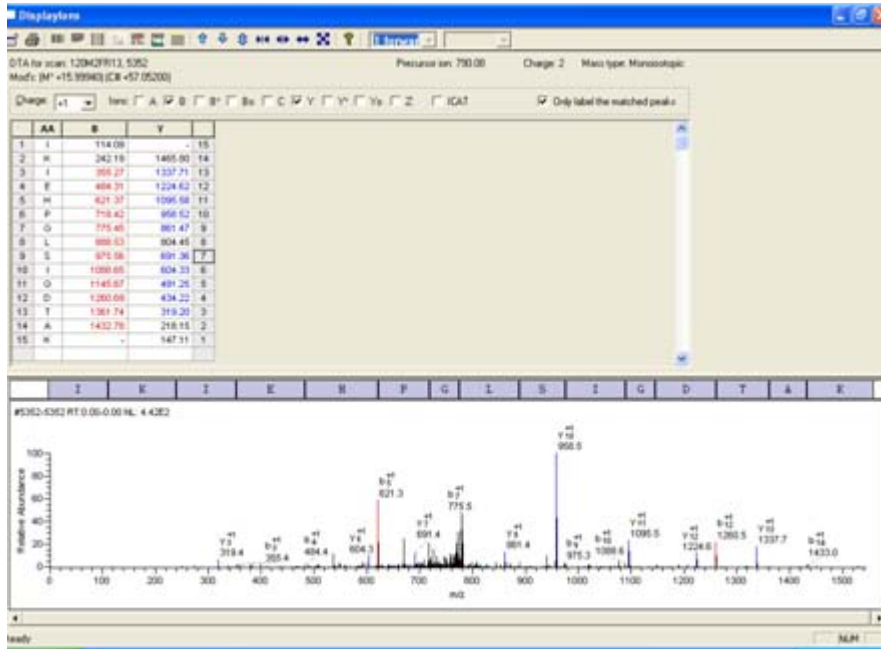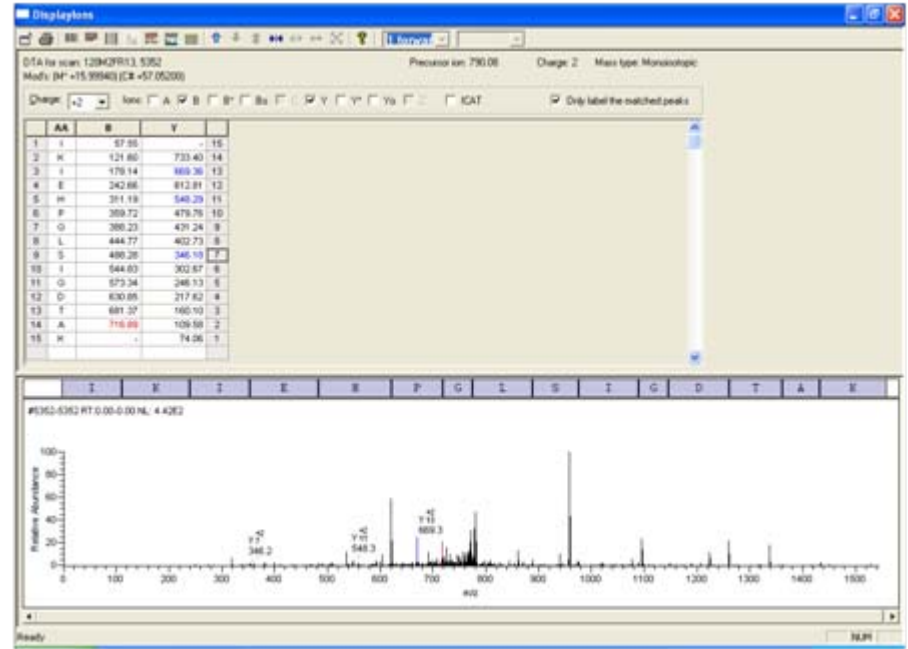

# KILPTLEAVAALGNKV IPI00318550.5

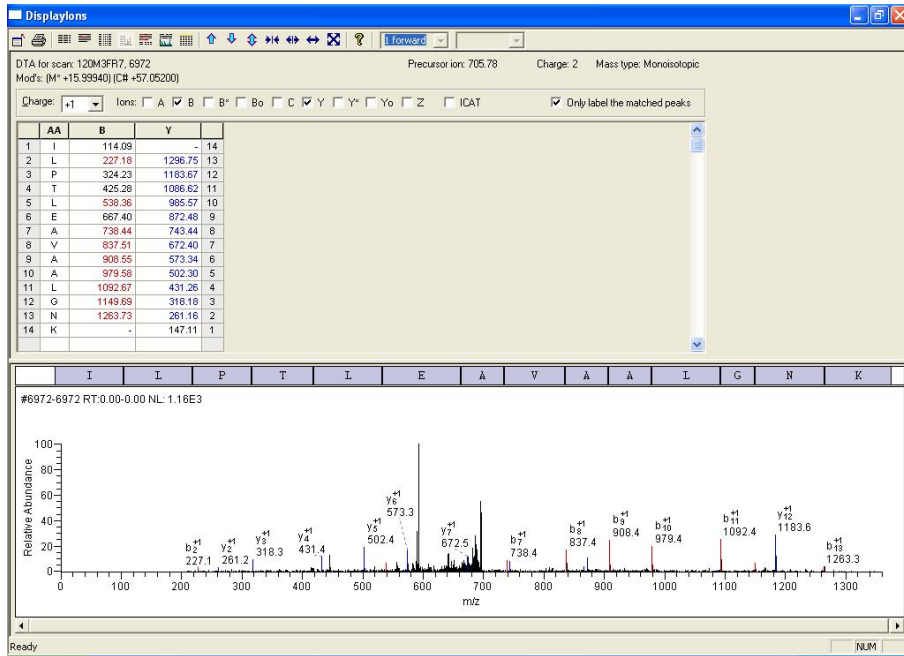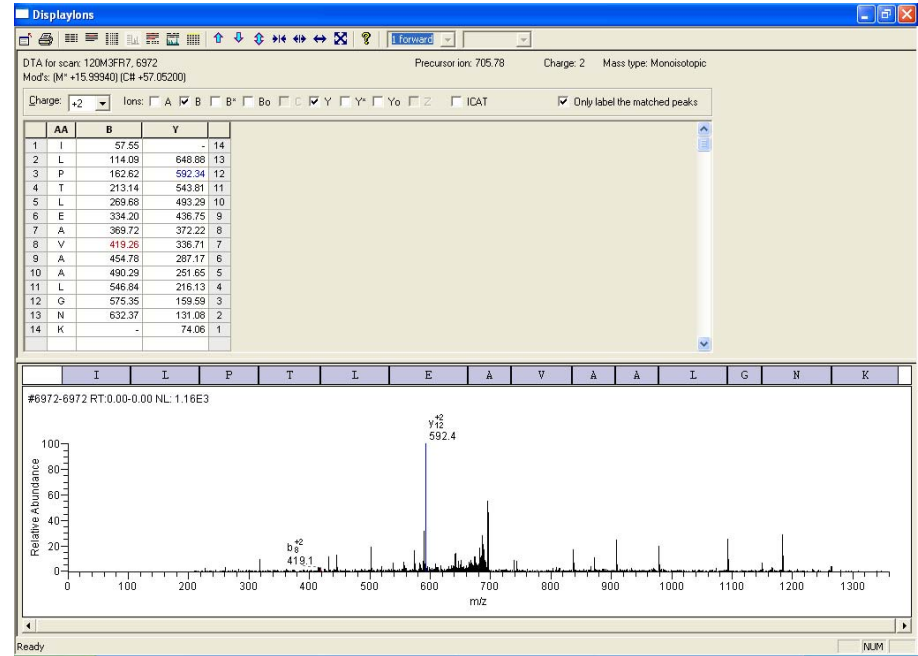

# KINEVQTDVSVDTKH

## IPI00314844.2, IPI00762705.1

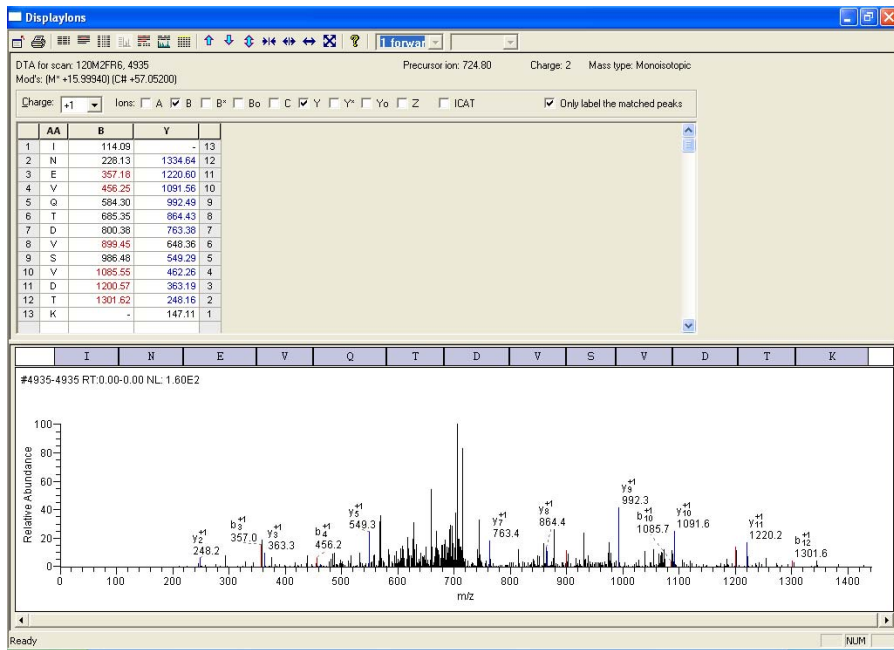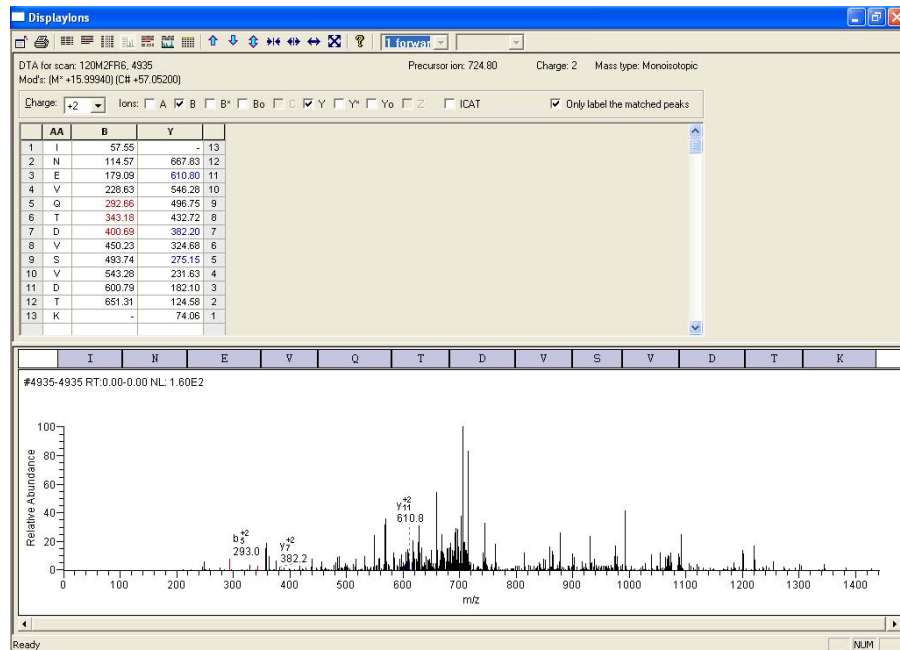

# KIPEGSAVPATDAAPKR

## IPI00457611.2, IPI00515330.1, IPI00648786.1

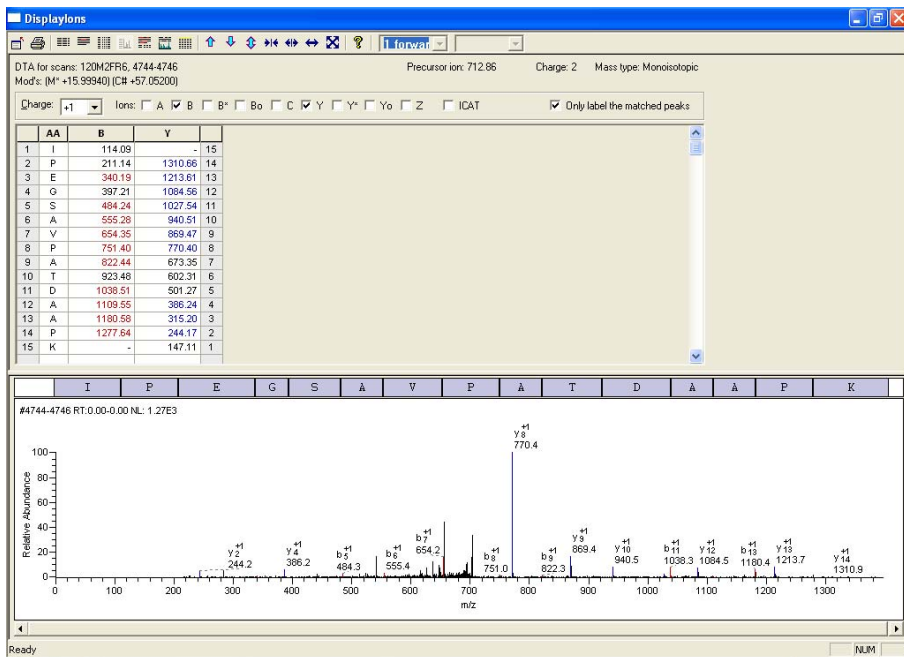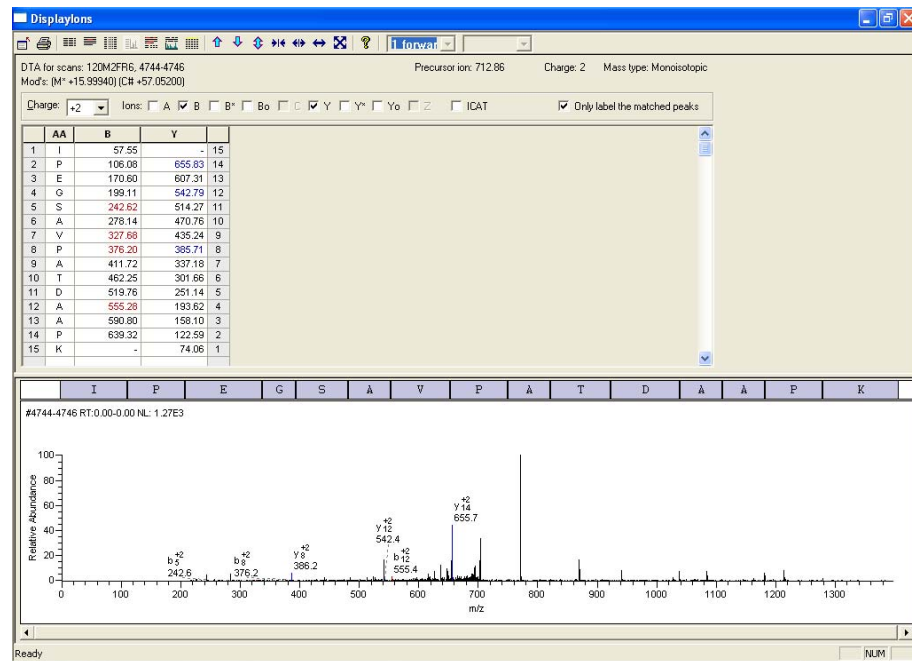

# KITDDQQESLNKW

IPI00134300.1, IPI00473603.1, IPI00756384.1, IPI00758127.1

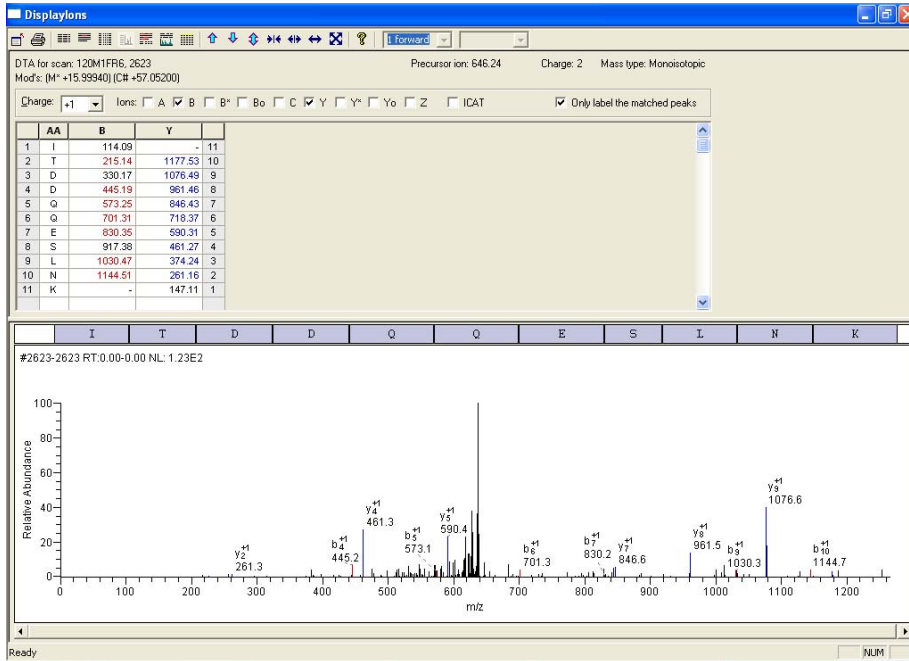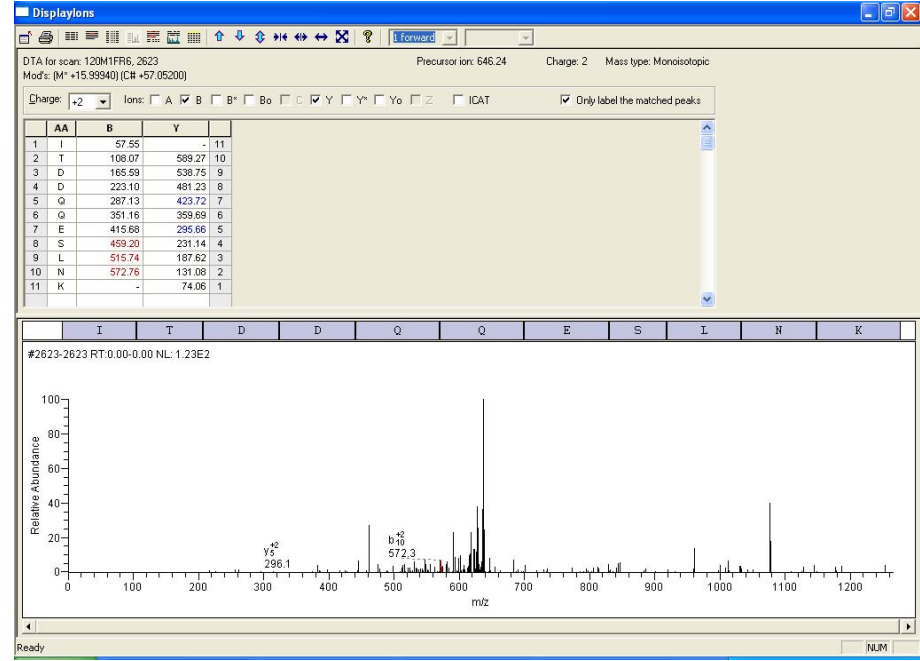

# KITEGDLSQLTASIRA

IPI00381394.4, IPI00473402.3, IPI00664670.3, IPI00753750.2, IPI00753917.1,  
IPI00761846.1

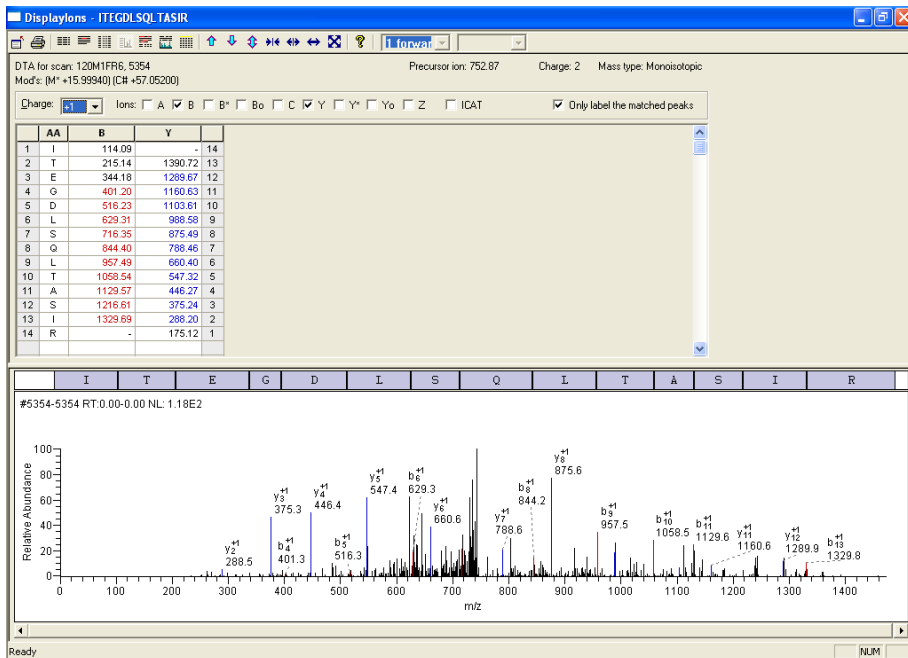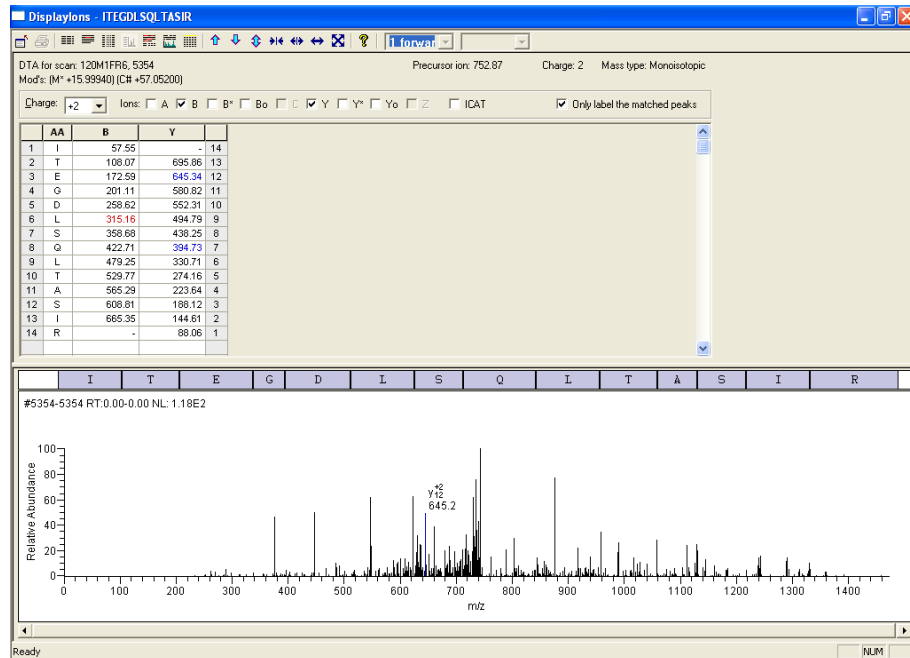

# KIVSNASCTTNCLAPLAKV

IPI00123176.1, IPI00273646.8, IPI00319731.1, IPI00399459.1, IPI00462605.4,  
 IPI00466634.4, IPI00606543.3, IPI00620765.1, IPI00622980.3, IPI00624252.3,  
 IPI00625893.3, IPI00663957.1, IPI00668276.2, IPI00675188.1, IPI00749581.1,  
 IPI00751677.2, IPI00752289.2, IPI00752685.2, IPI00753028.1, IPI00753102.1,  
 IPI00754317.1, IPI00756025.1, IPI00758168.1

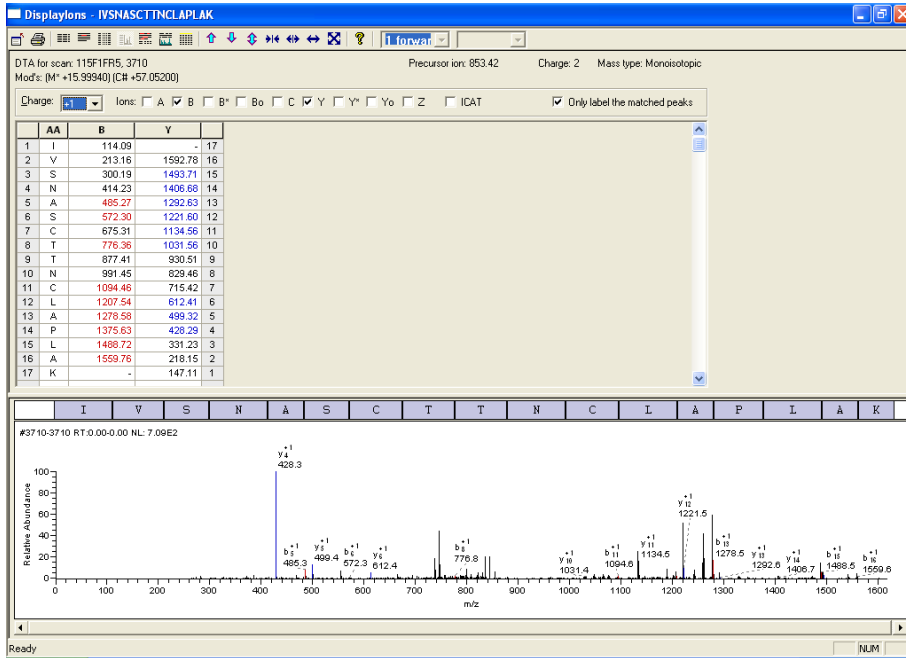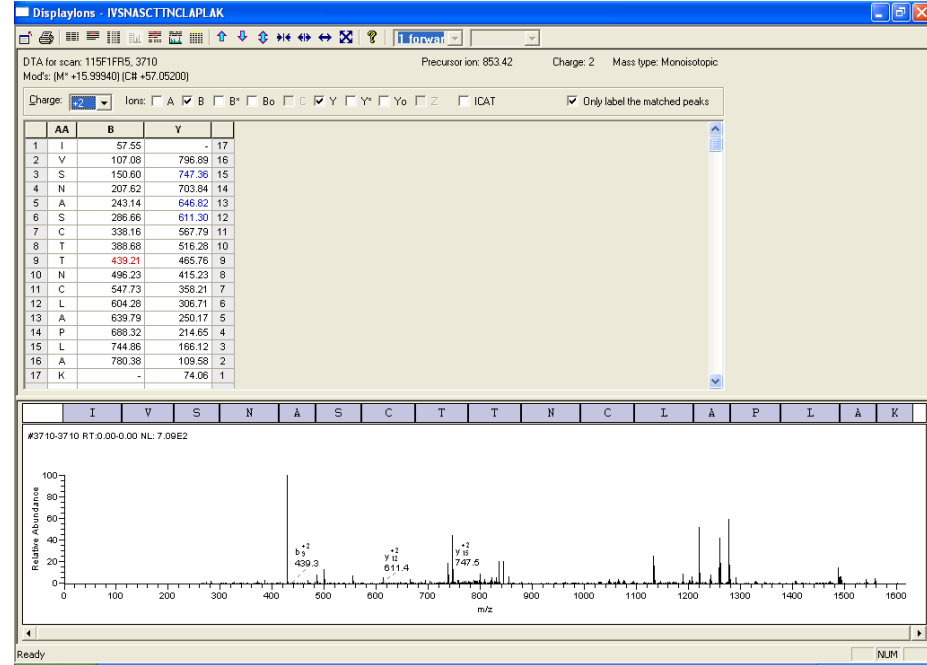

# KKDDEENYLDLFSHKN IPI00458765.2

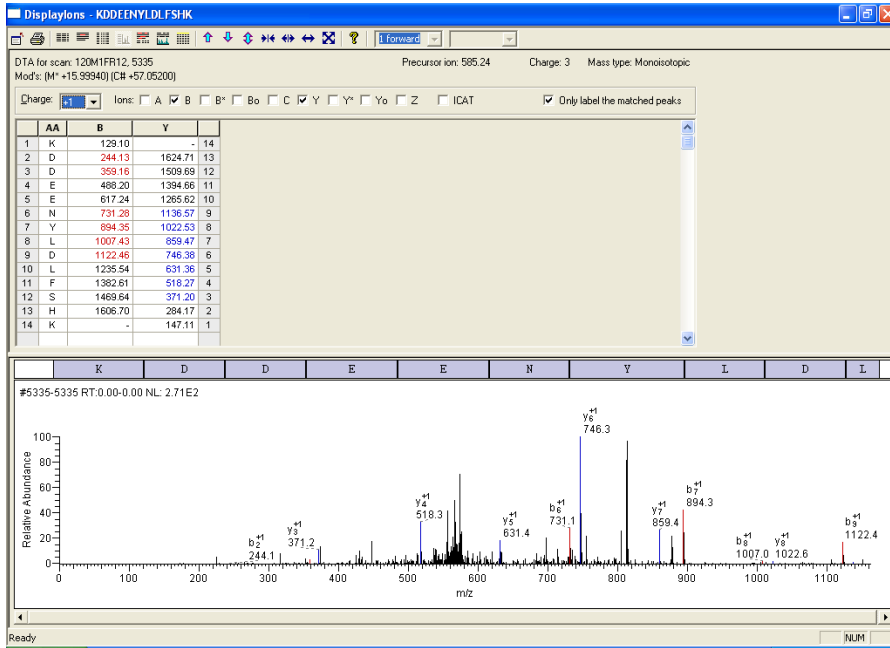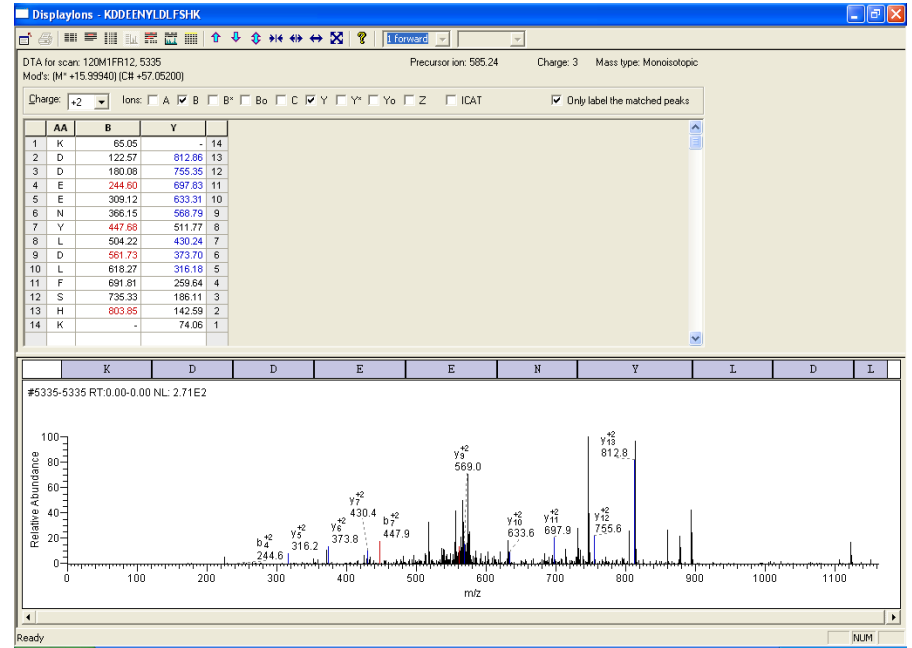



# KKDDEENYLDLFSHK

## IPI00458765.2

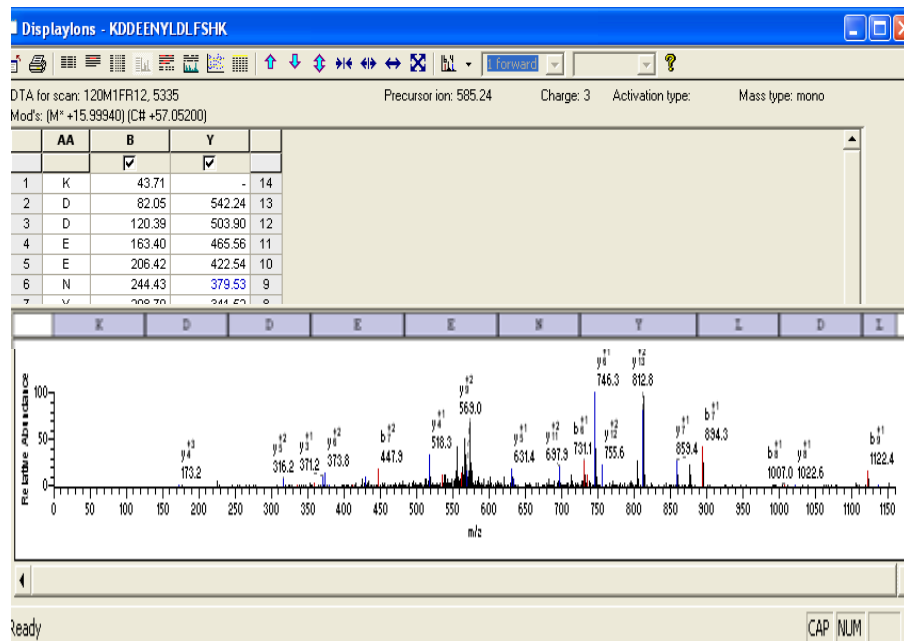

# KKHPDASVNFSEFSKK

IPI00229570.1, IPI00355265.3, IPI00377392.3, IPI00420261.4, IPI00458851.1,  
 IPI00462121.1, IPI00553608.1, IPI00620379.2, IPI00621065.4, IPI00621909.3,  
 IPI00622269.3, IPI00623111.3, IPI00623466.2, IPI00624622.3, IPI00625256.3,  
 IPI00661255.1, IPI00664560.1, IPI00665601.1, IPI00752229.1, IPI00753905.1,  
 IPI00755438.1, IPI00757619.1, IPI00761360.1, IPI00761560.1

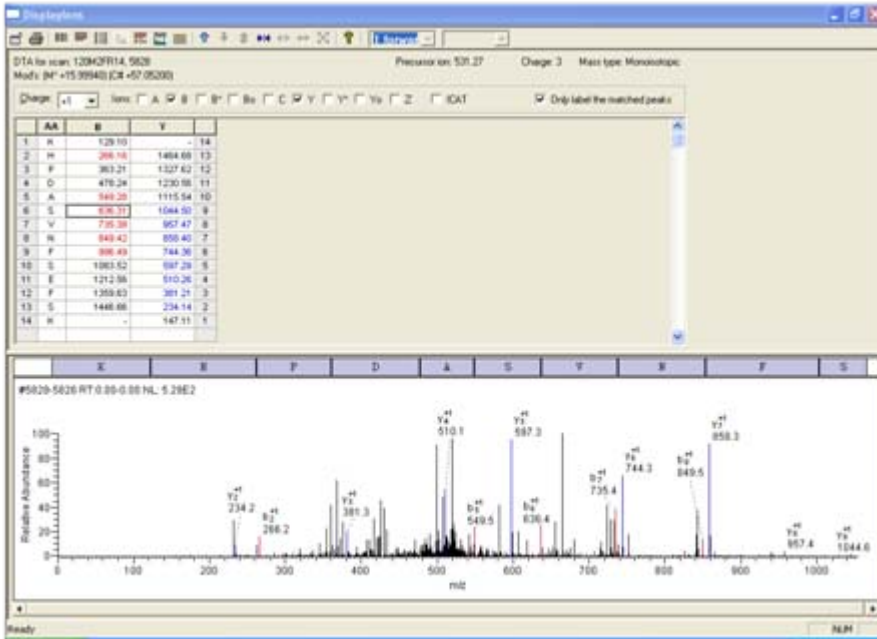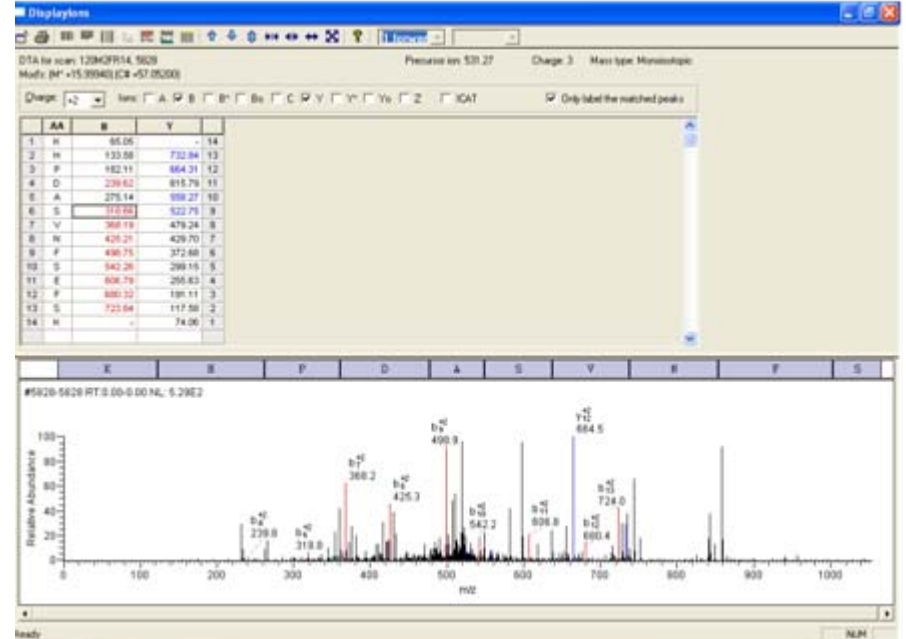

# KKHPDASVNFSEFSKK

IPI00229570.1, IPI00355265.3, IPI00377392.3, IPI00420261.4, IPI00458851.1,  
IPI00462121.1, IPI00553608.1, IPI00620379.2, IPI00621065.4, IPI00621909.3,  
IPI00622269.3, IPI00623111.3, IPI00623466.2, IPI00624622.3, IPI00625256.3,  
IPI00661255.1, IPI00664560.1, IPI00665601.1, IPI00752229.1, IPI00753905.1,  
IPI00755438.1, IPI00757619.1, IPI00761360.1, IPI00761560.1

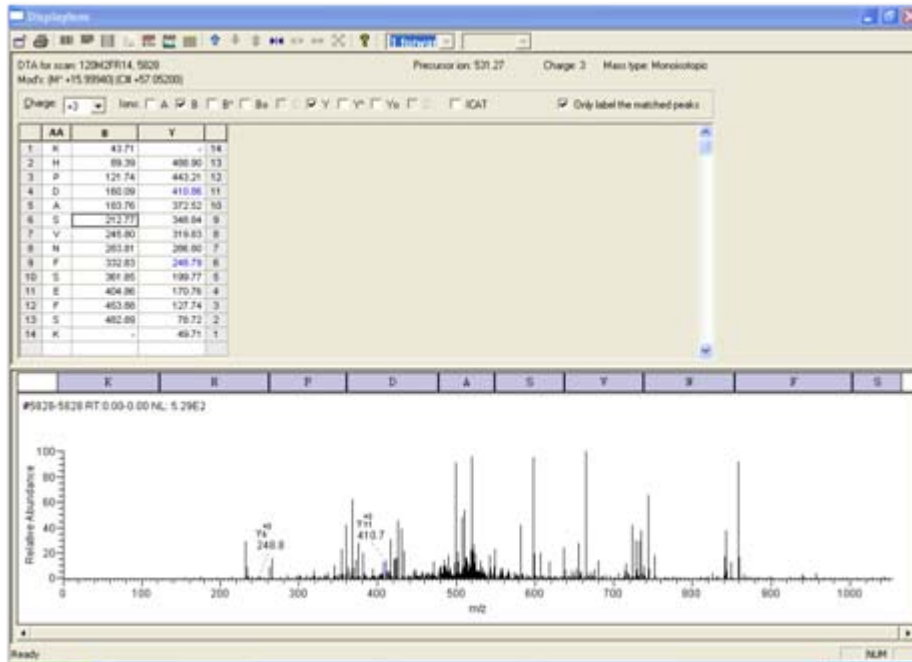

# KKLEAAATALATKS IPI00111412.2

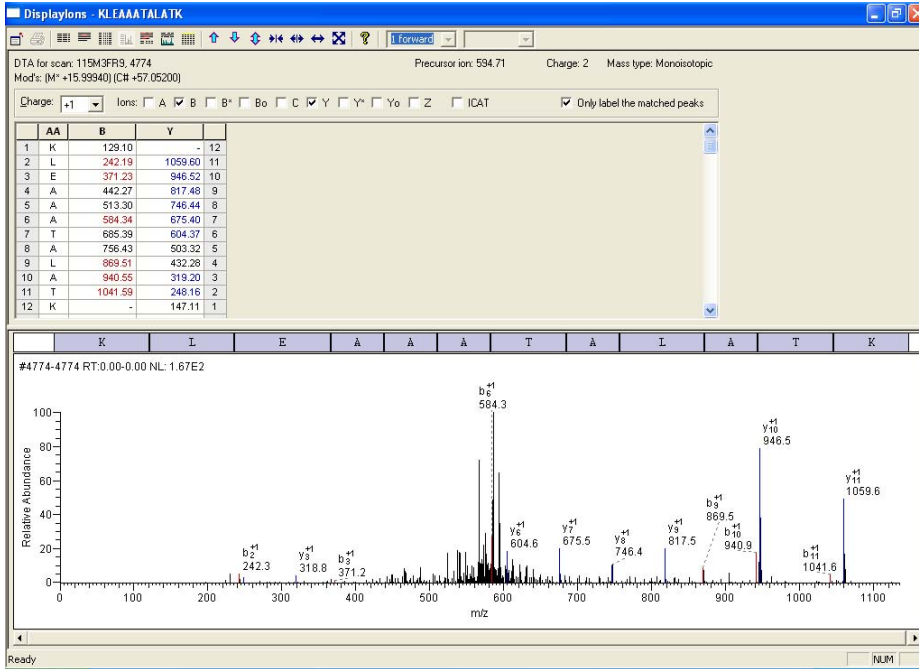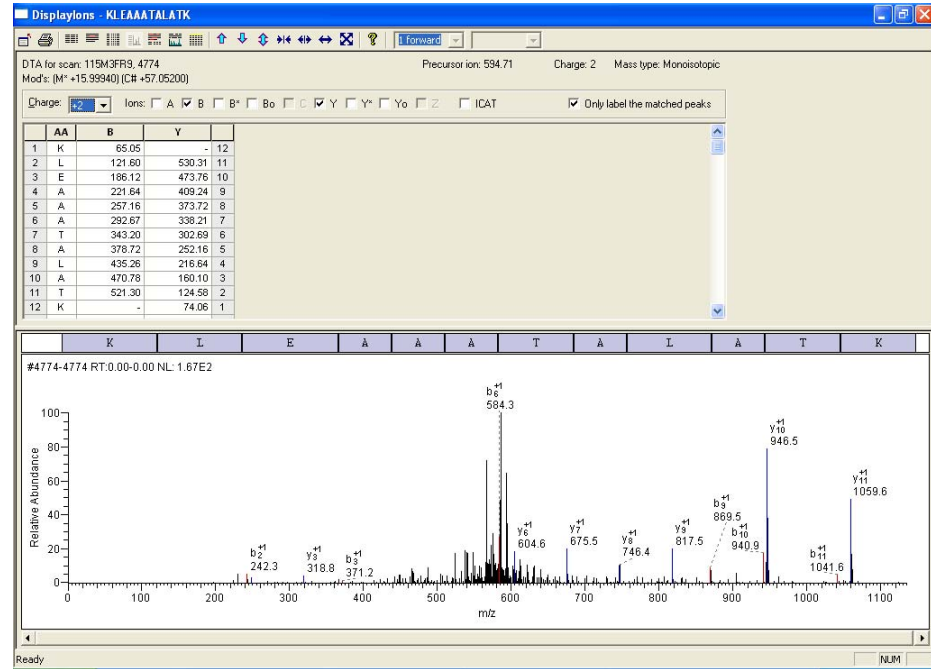

# KKVEEAEPEEFVVEKV

IPI00129468.2, IPI00381658.1, IPI00605662.2, IPI00625302.1, IPI00660374.1,  
IPI00660820.1, IPI00676689.1, IPI00677454.1, IPI00678989.1, IPI00761699.1

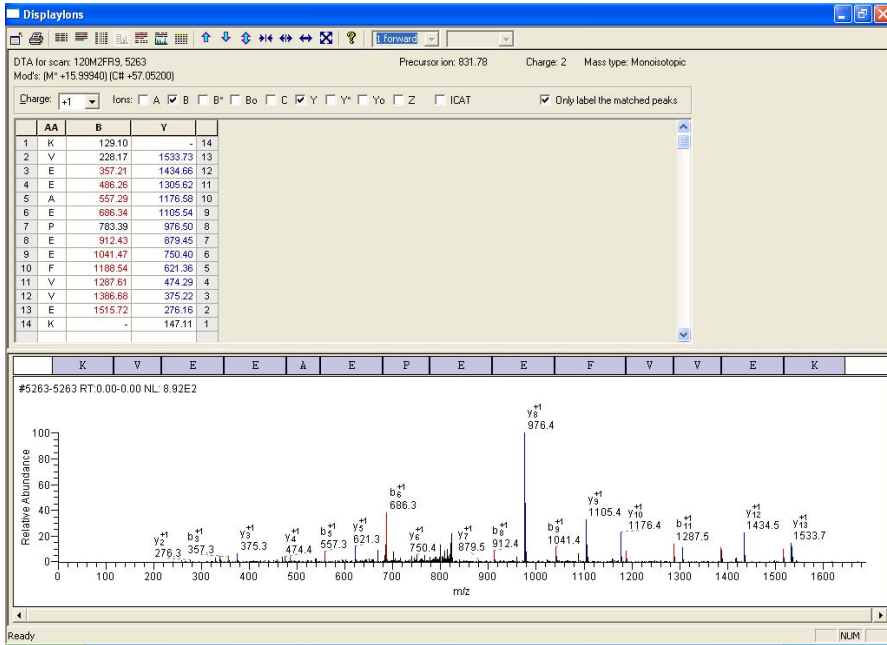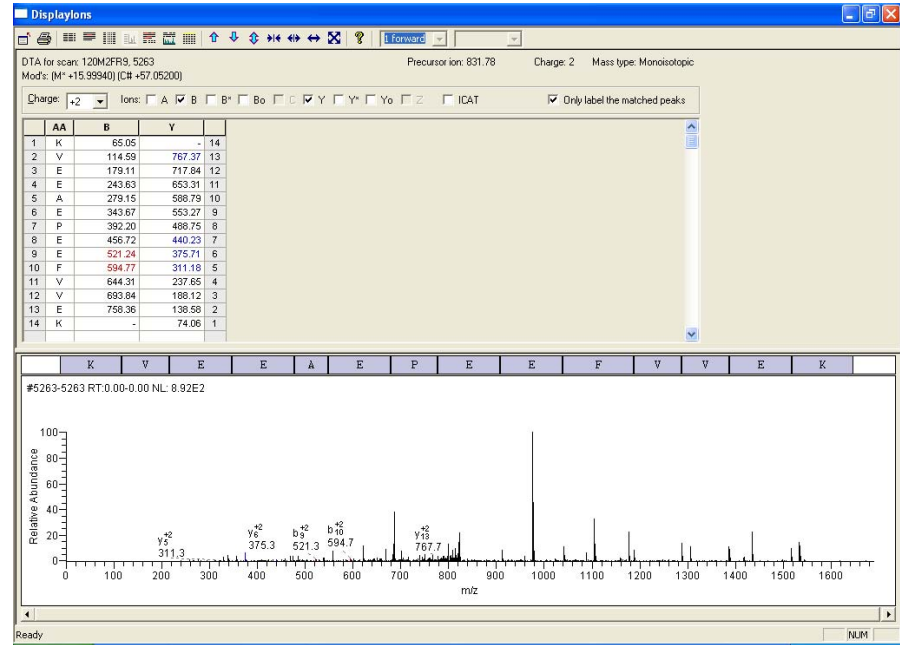

# KLAALNPESNTSGLDIFAKF IPI00130344.2

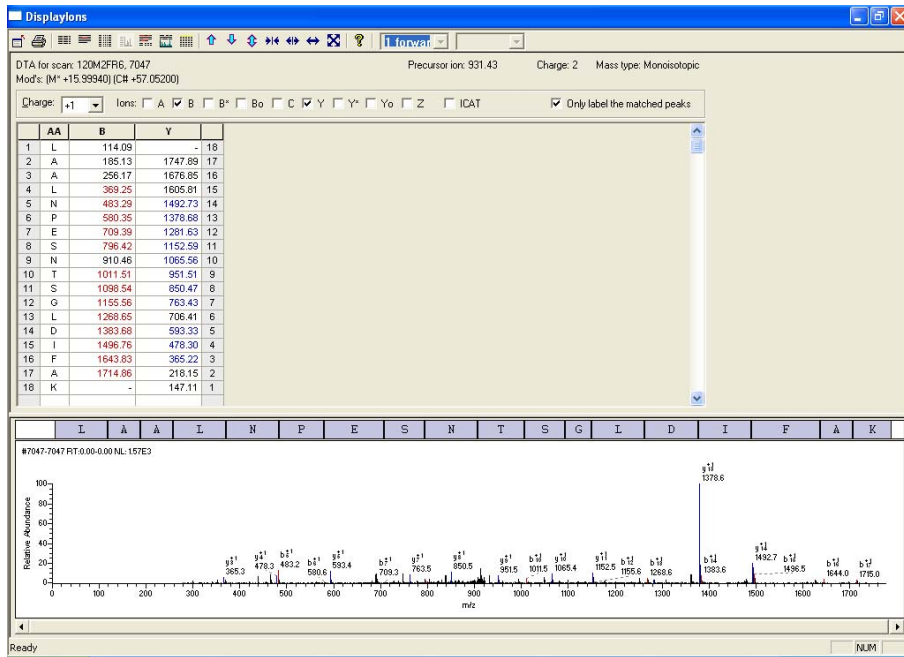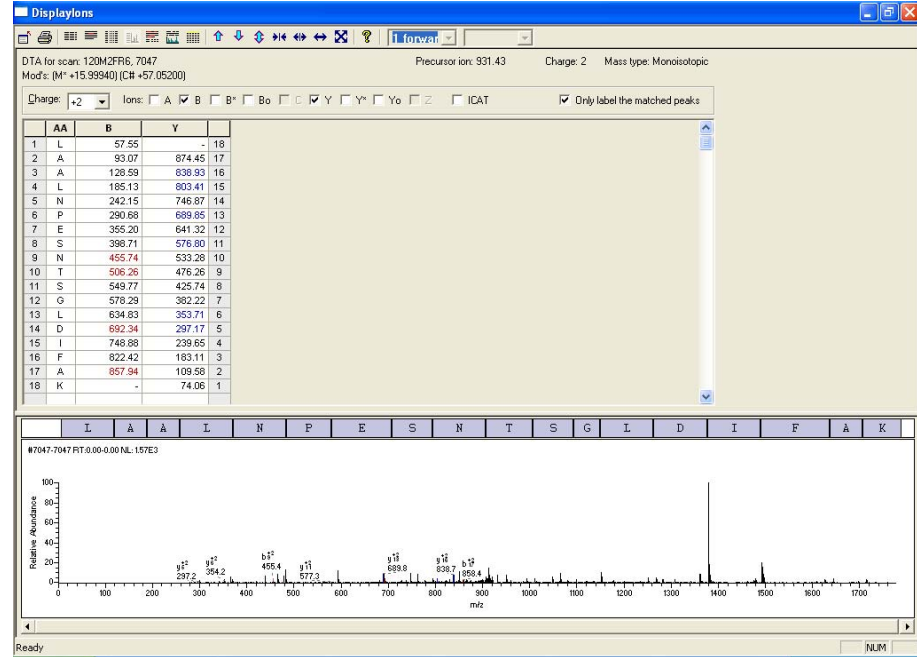

# KLDELGVPLYAVVKE IPI00187272.2

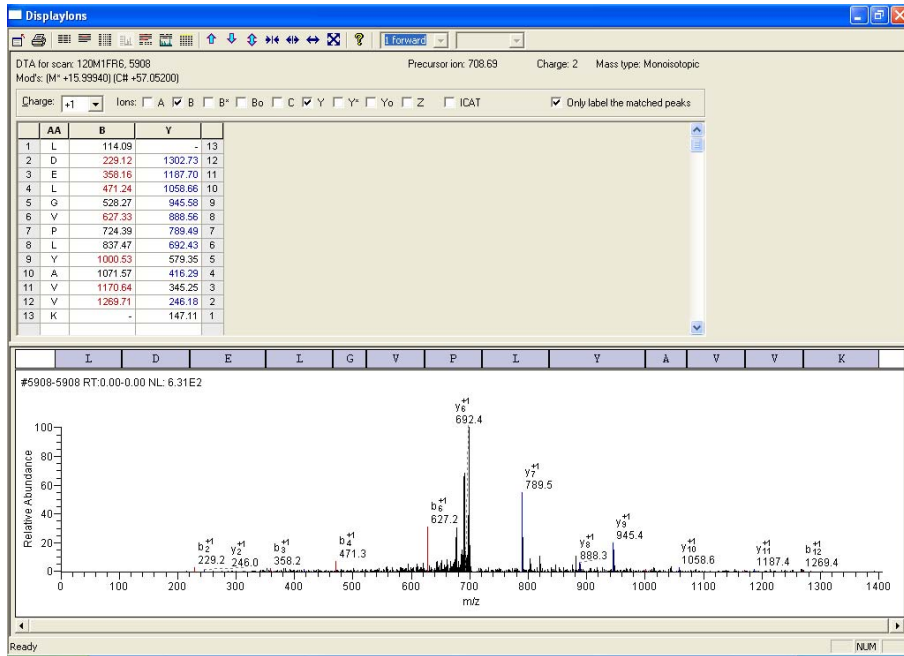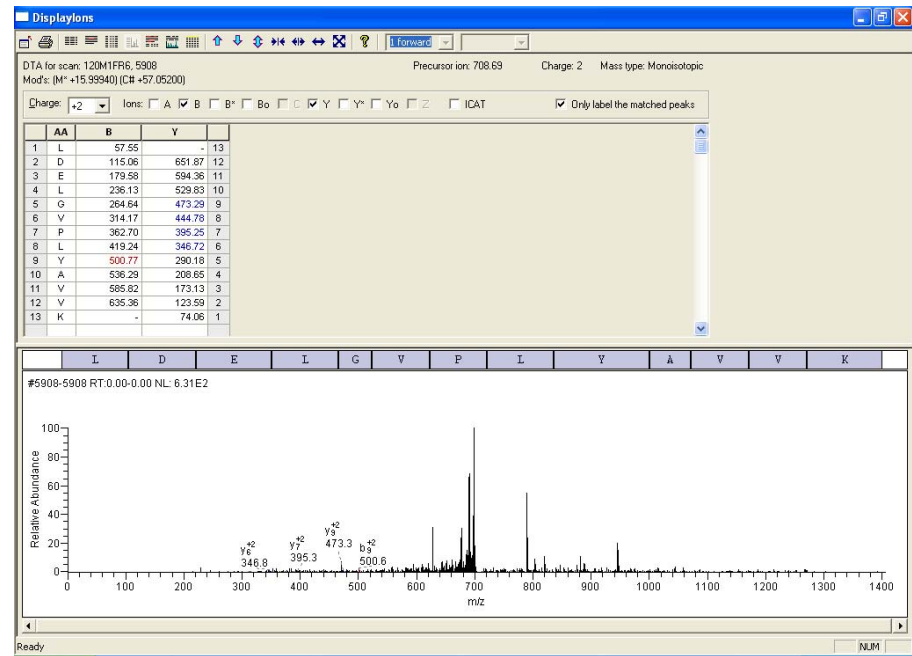

# KLFIGGLNVQTSEGLRG IPI00109813.1

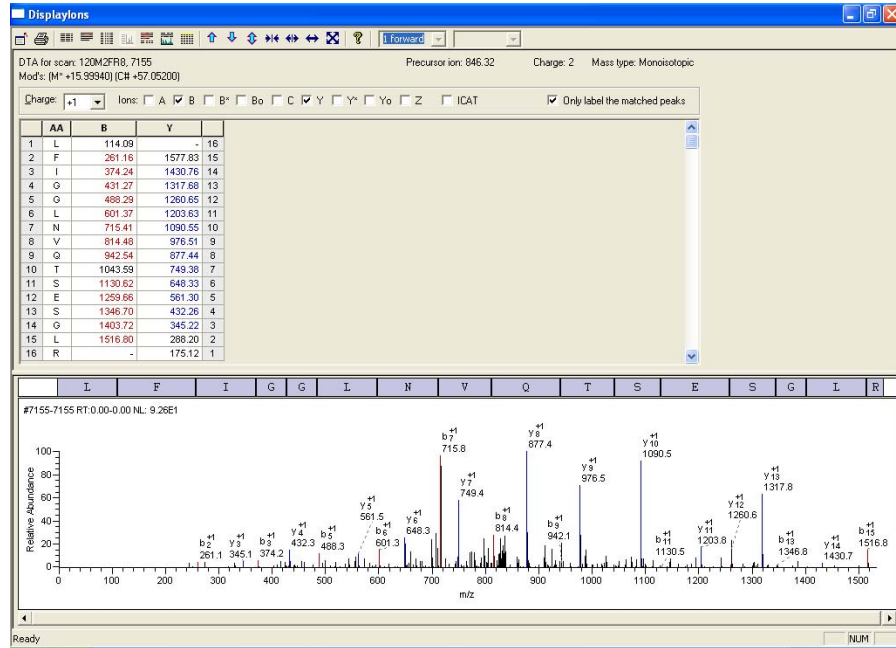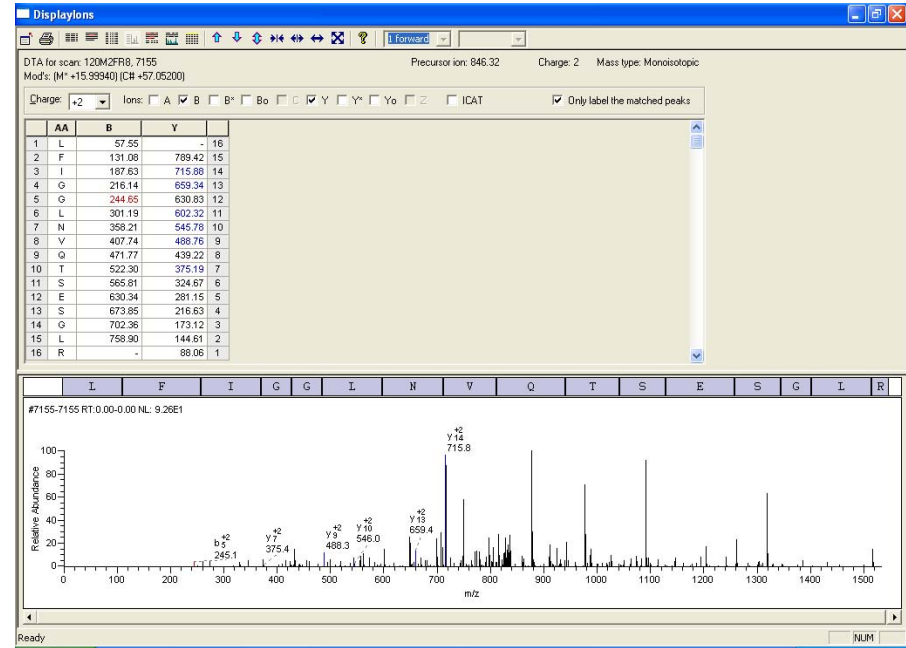



# KLGEYGFQNAILVRY

## IPI00131695.3

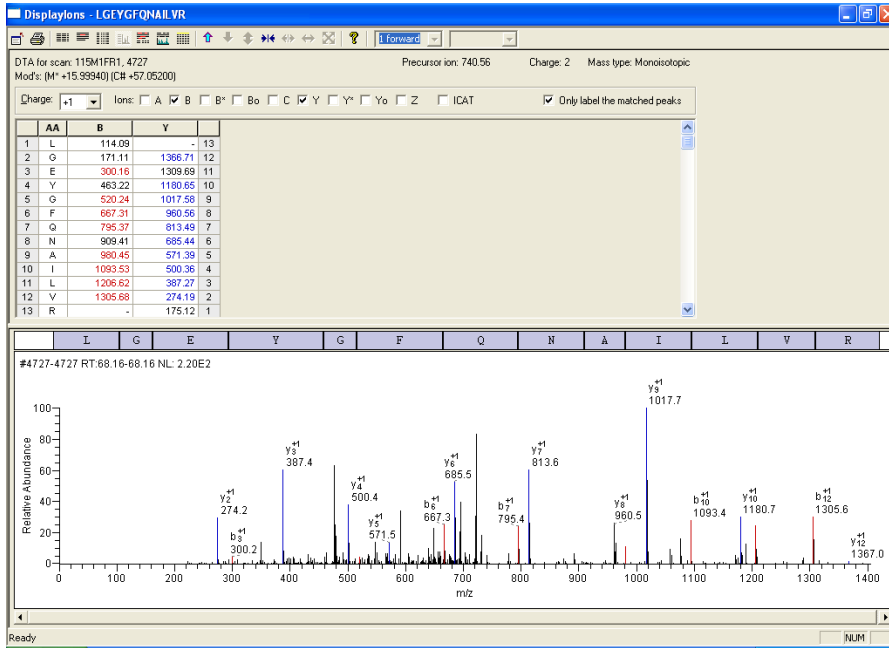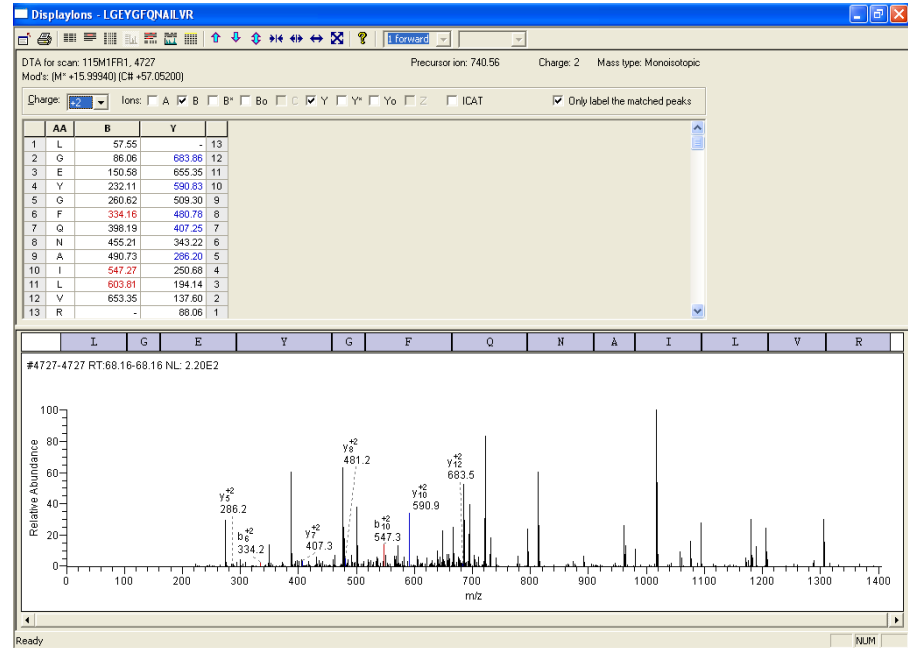

# KLGGSAVISLEGKPL IPI00409405.2

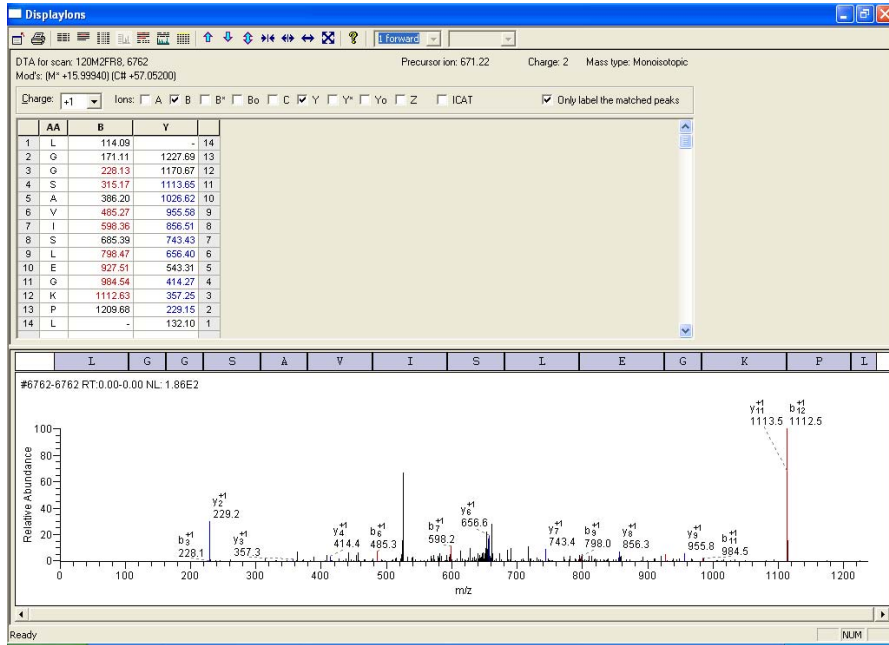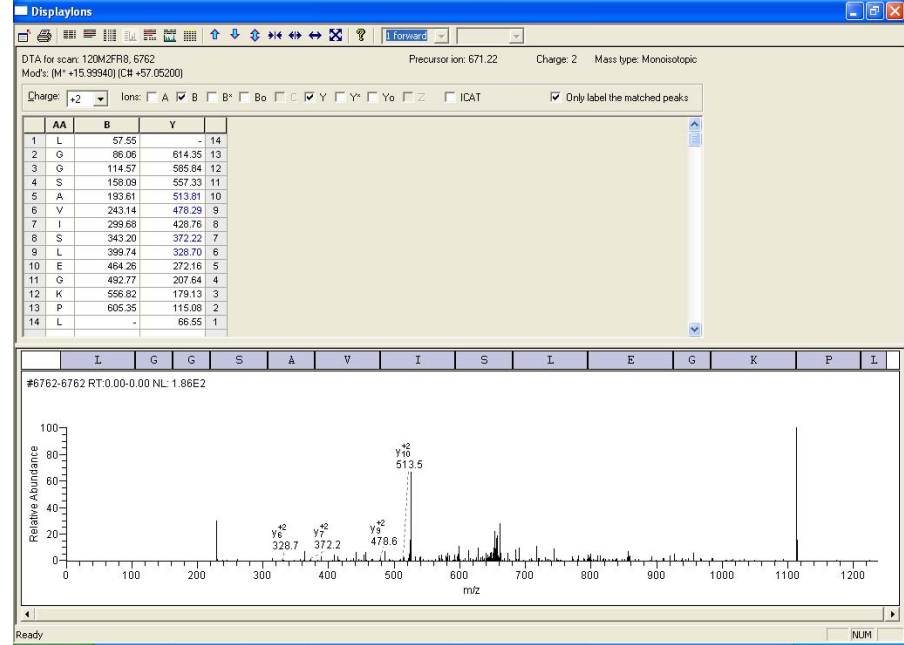

# KLGNTISSLFGGGTSSDAKE IPI00123342.3

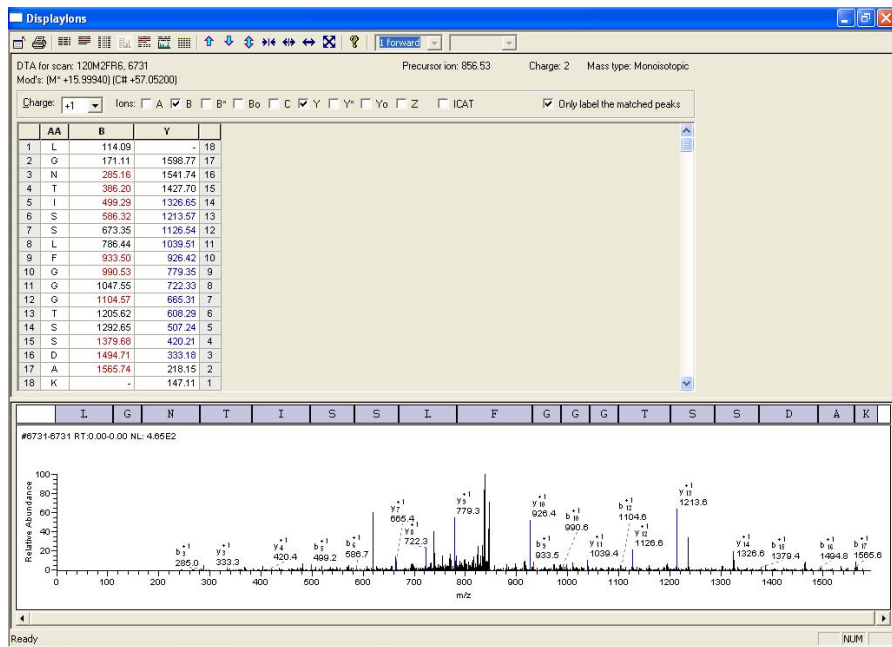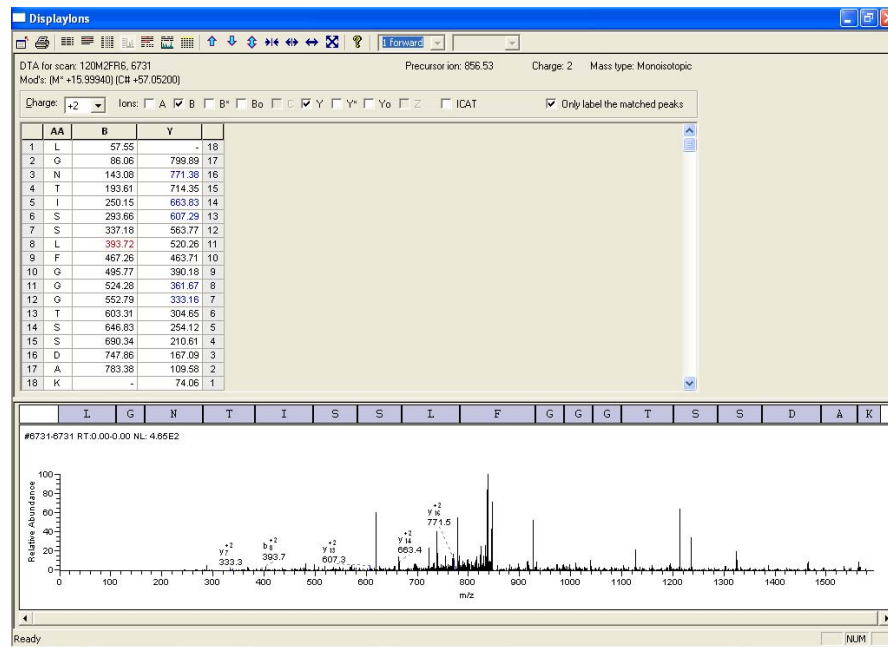

# KLLATEQEDAAVAKS

## IPI00121149.1, IPI00126351.5, IPI00755120.1

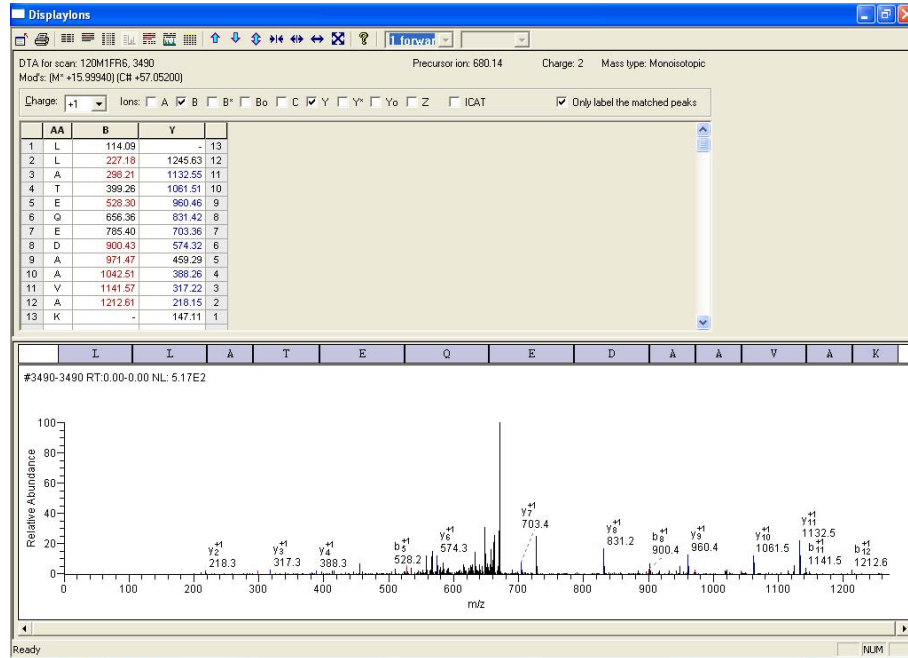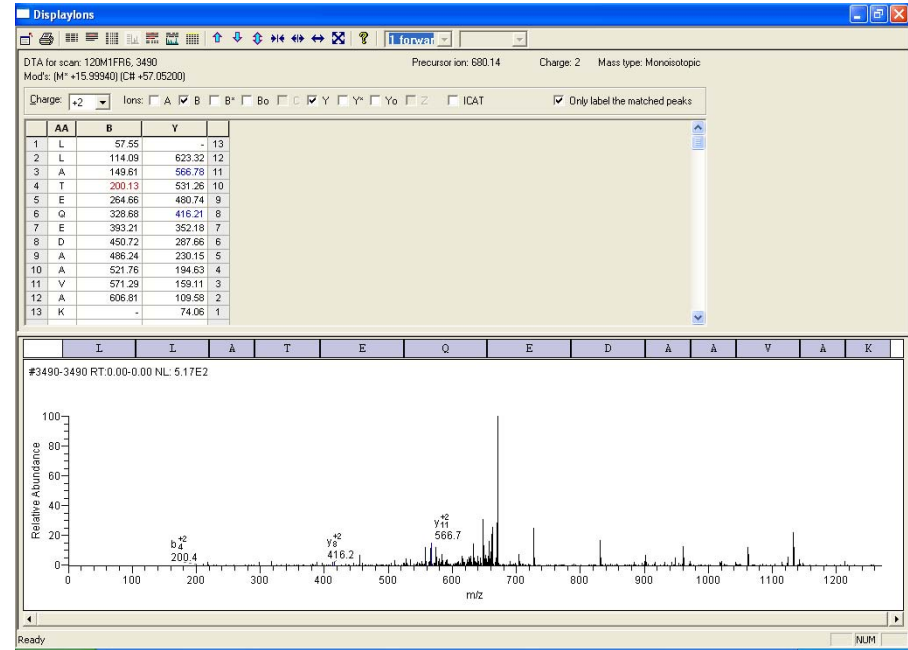

# KLLDAVDTYIPVPTRD

## IPI00274407.1, IPI00460132.1, IPI00625588.1

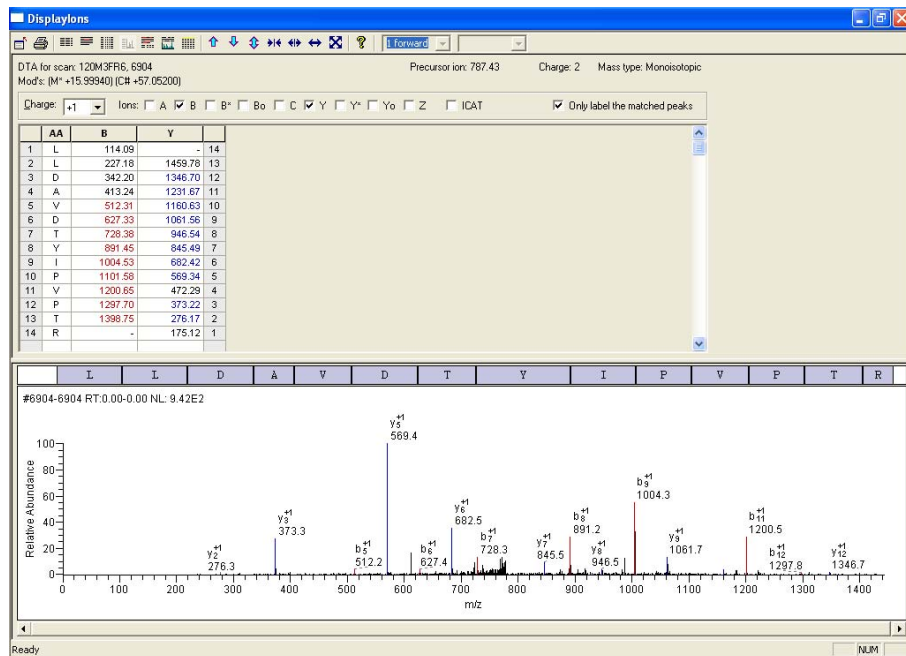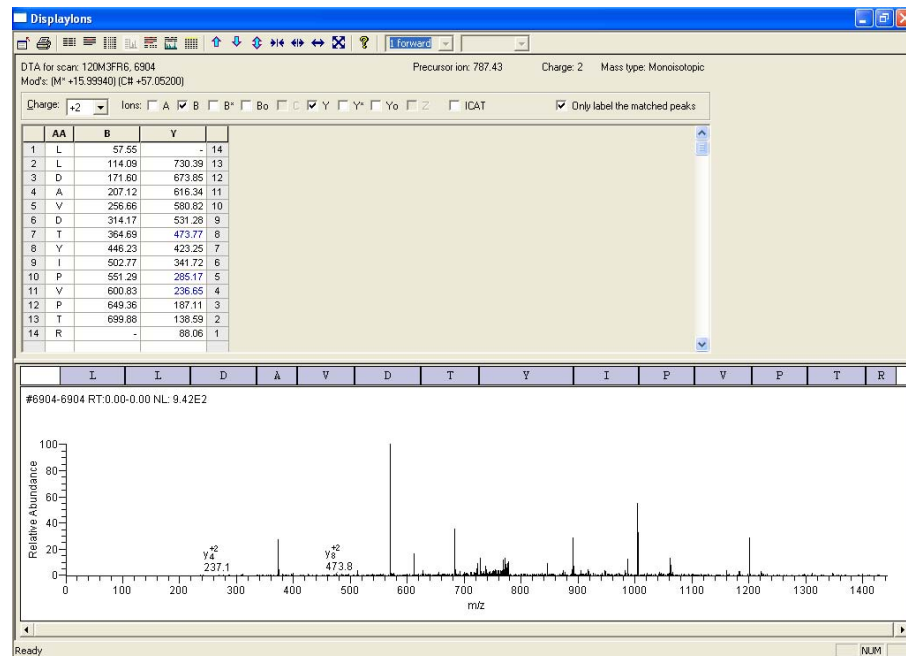

# KLLGPDAAINLADPDGALAKR IPI00116112.2

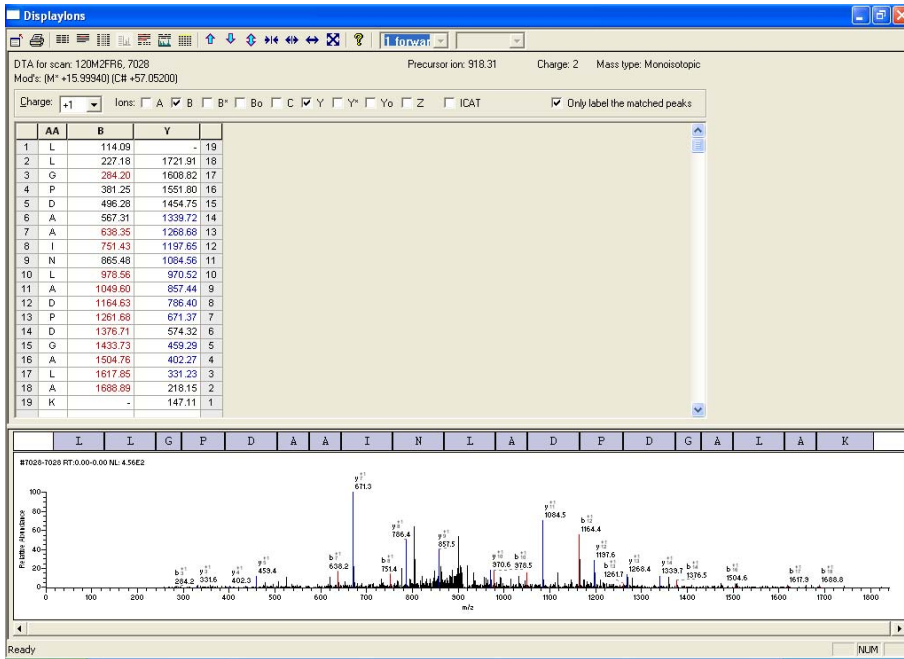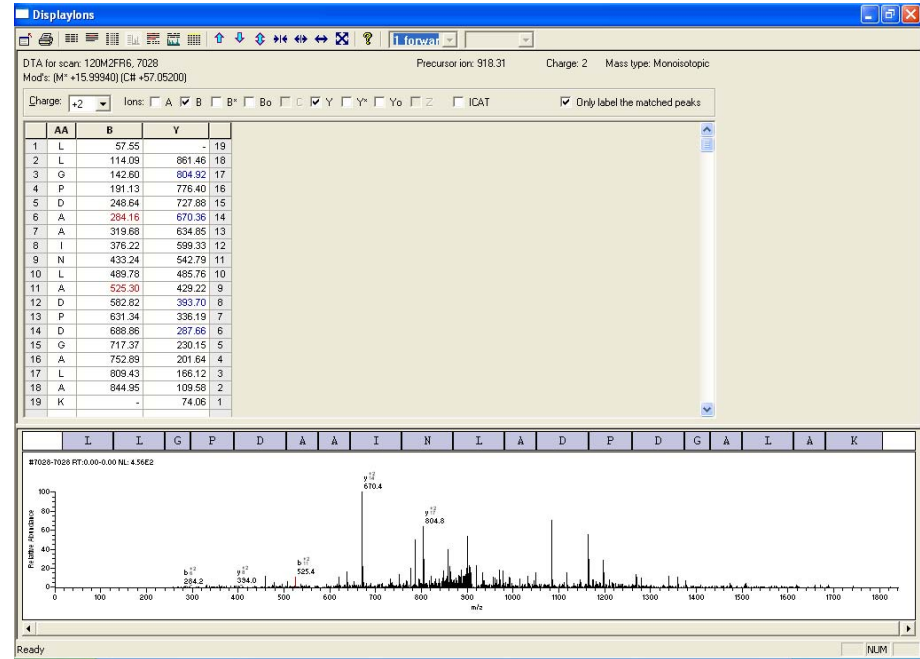

# KLLLQVQHASKQ

IPI00115564.4, IPI00127841.2, IPI00458351.2, IPI00462250.2, IPI00658303.1,  
IPI00676622.1, IPI00751119.1

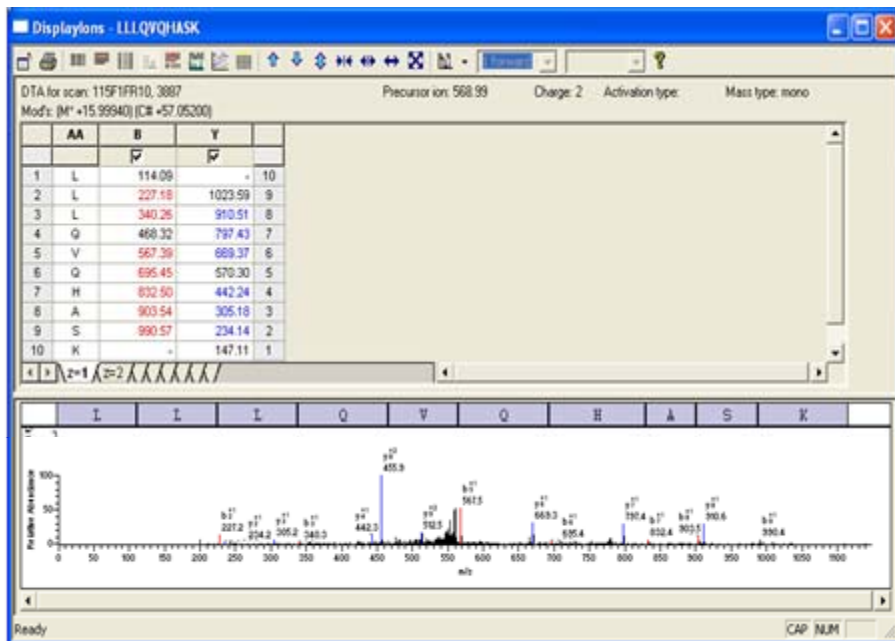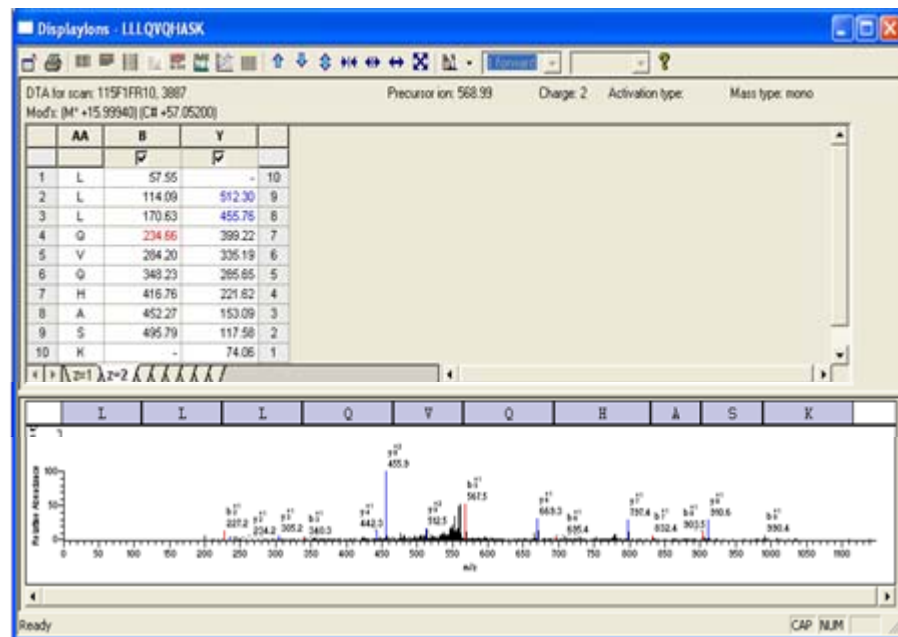

# KLLPEYPGVLSEVQEEKG IPI00230042.4

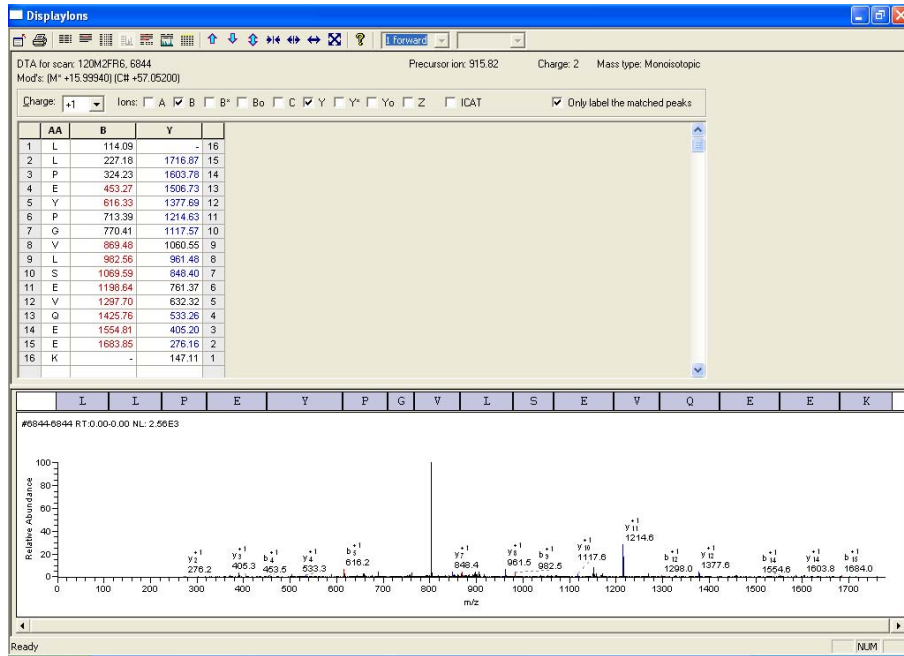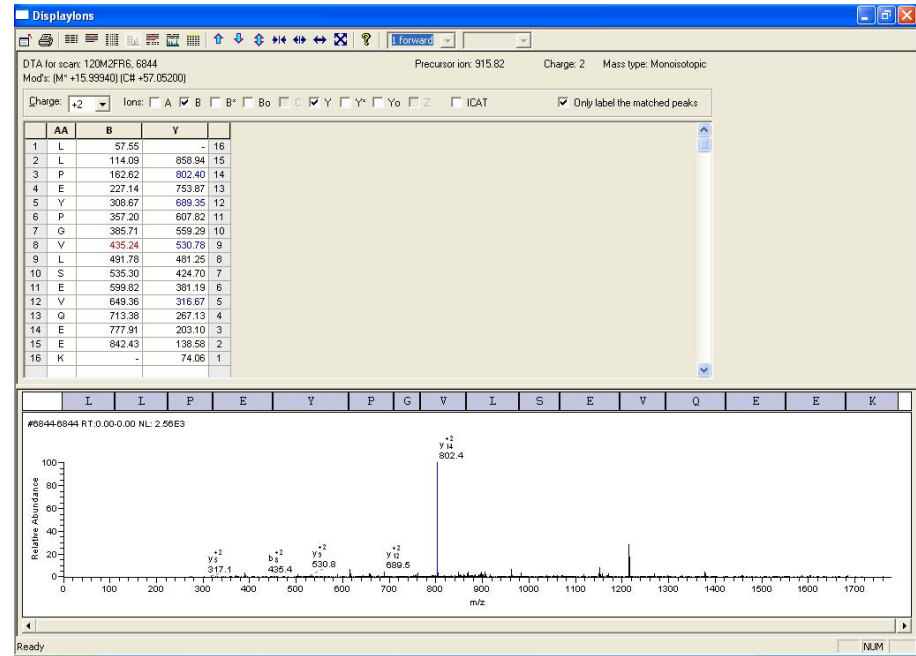



# KLVNAPVSDIIEIKS

## IPI00116753.3, IPI00607901.2

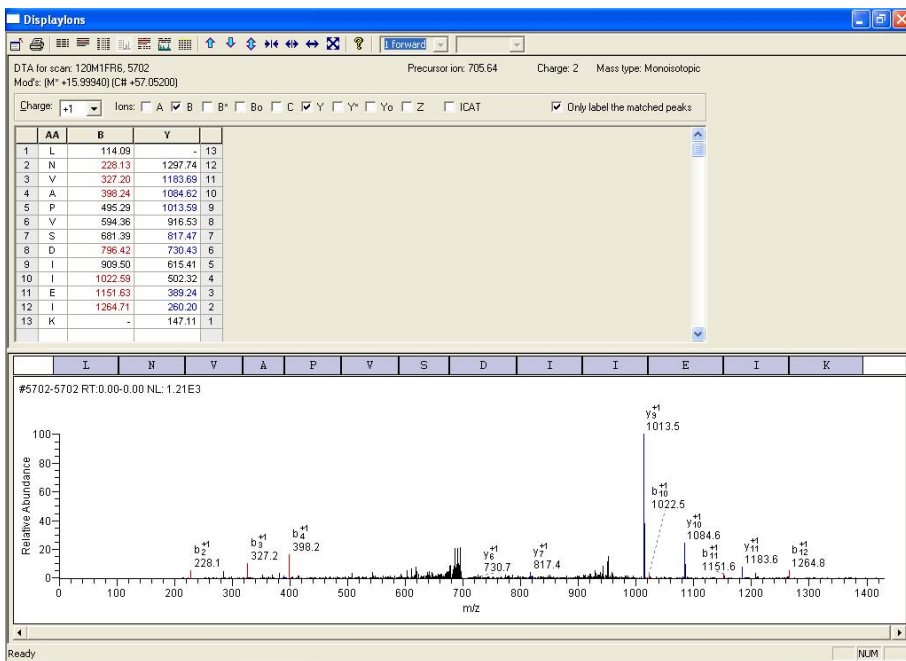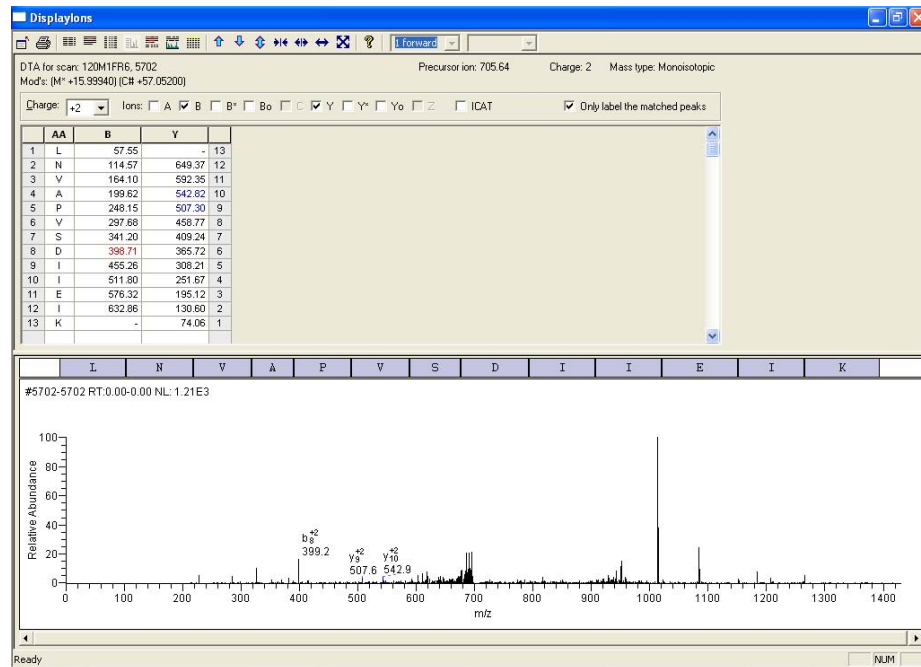

# KLPIGDVATQYFADR IPI00331174.5

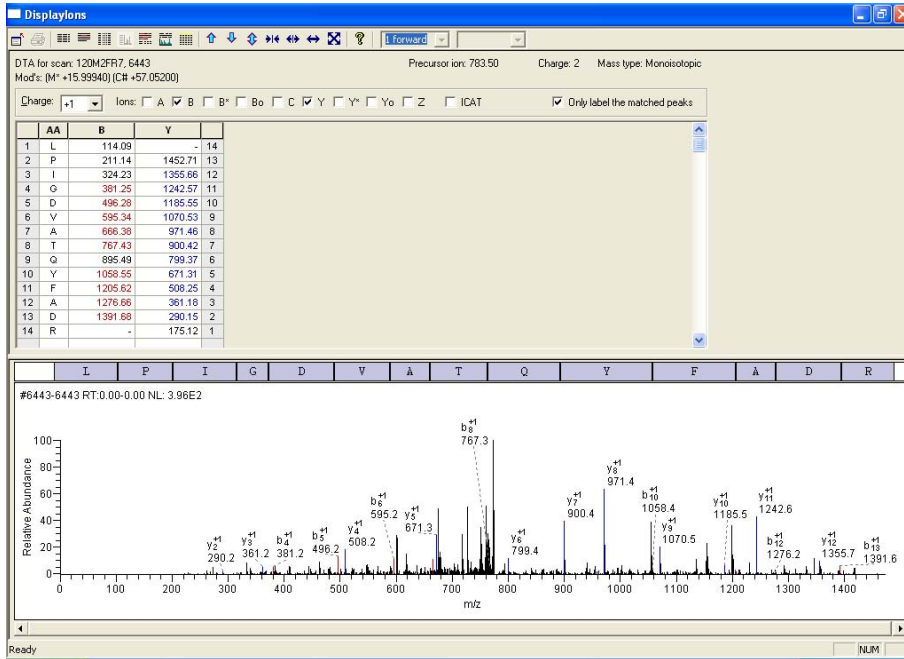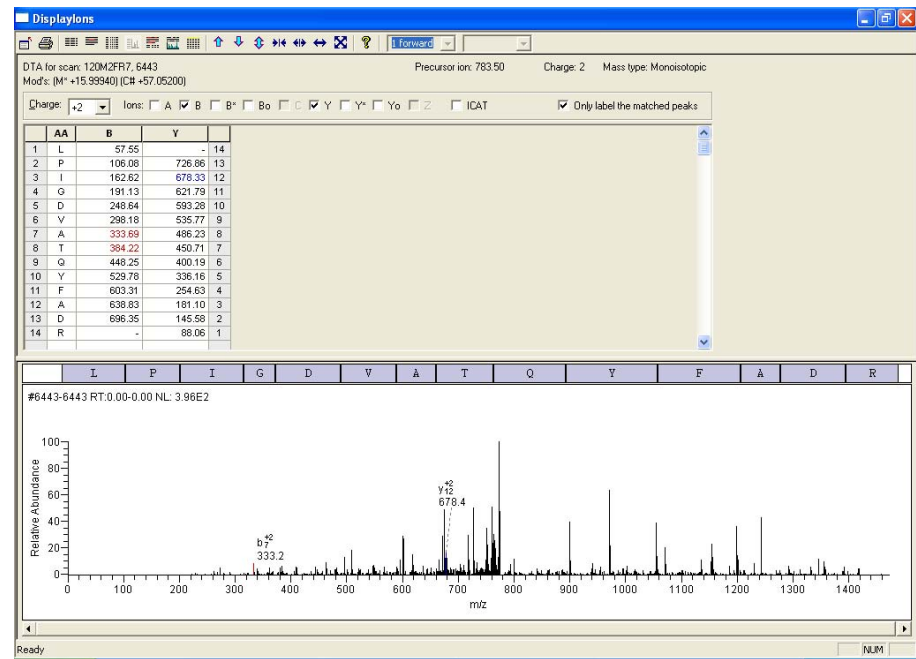

# KLTLDTIFVPNTGKK

## IPI00122548.3, IPI00762642.1

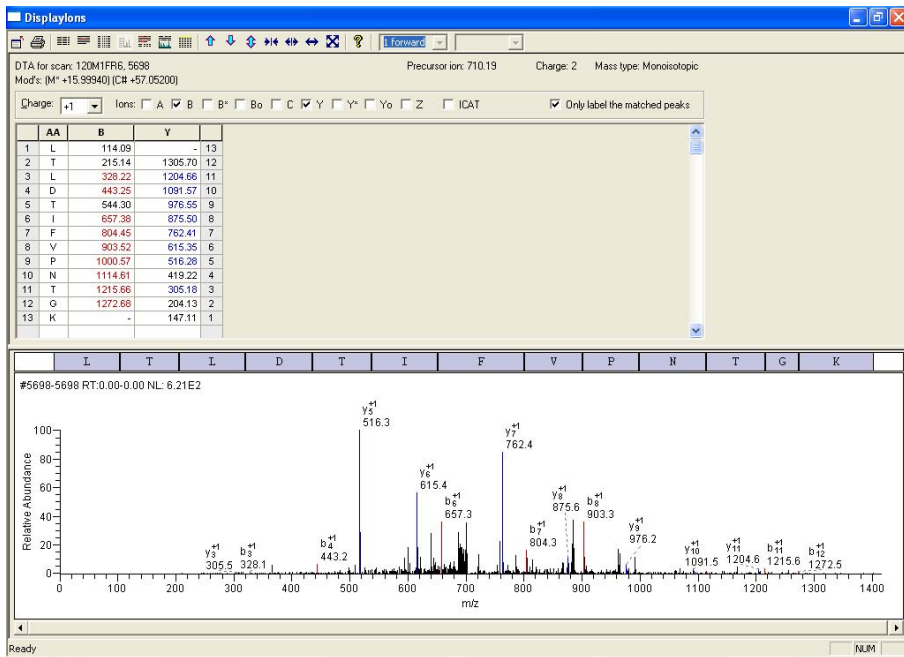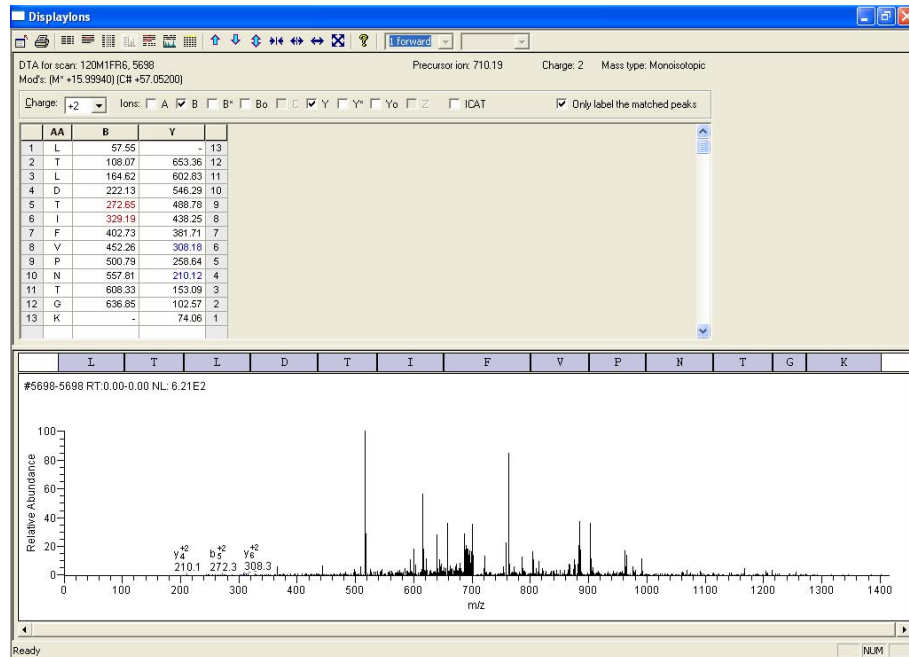

# KLTQDQDVDVKY IPI00310091.7

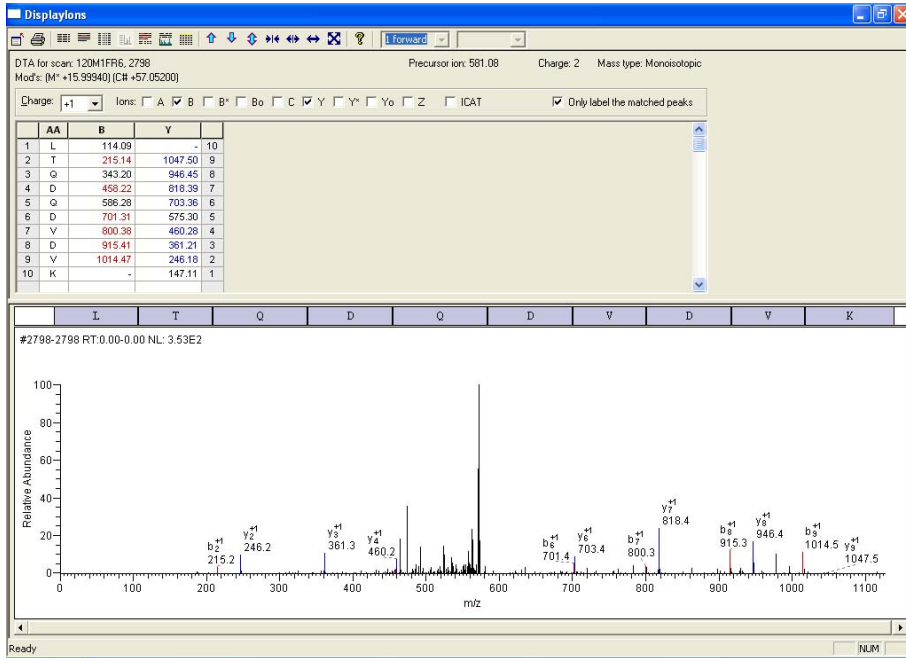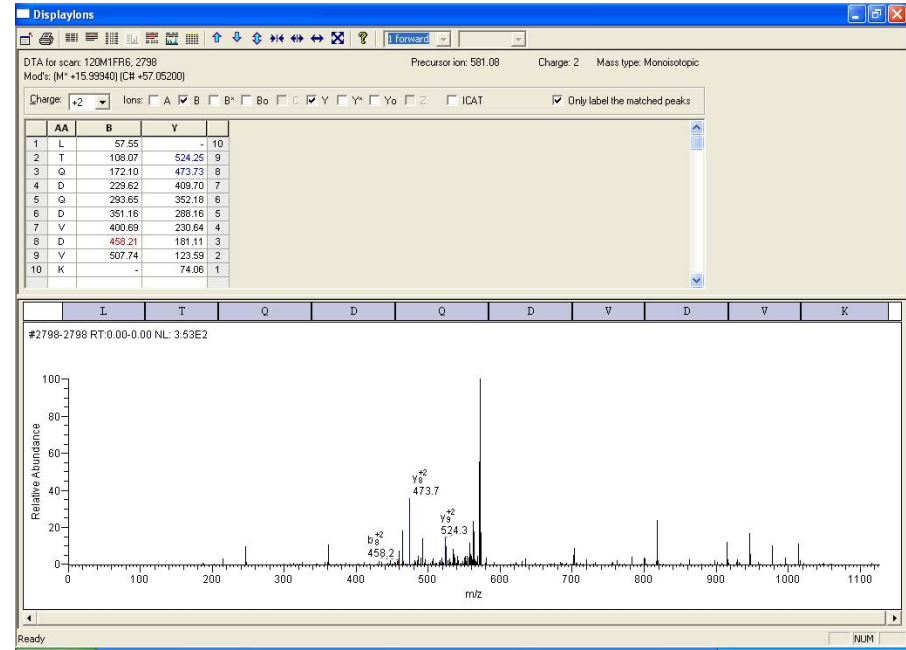

# KLTSAVSSLPELEKK

## IPI00224219.1, IPI00457668.1

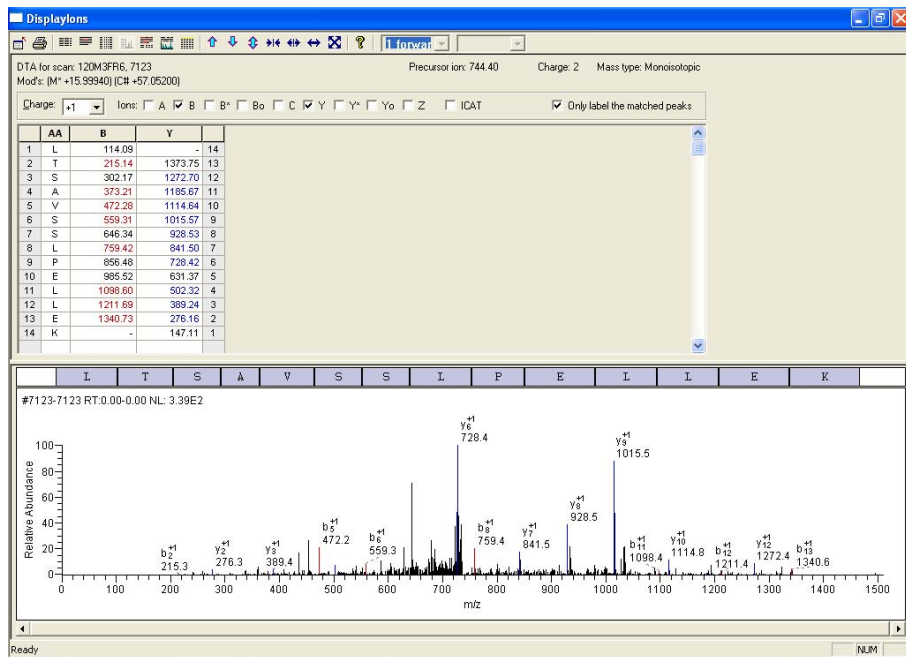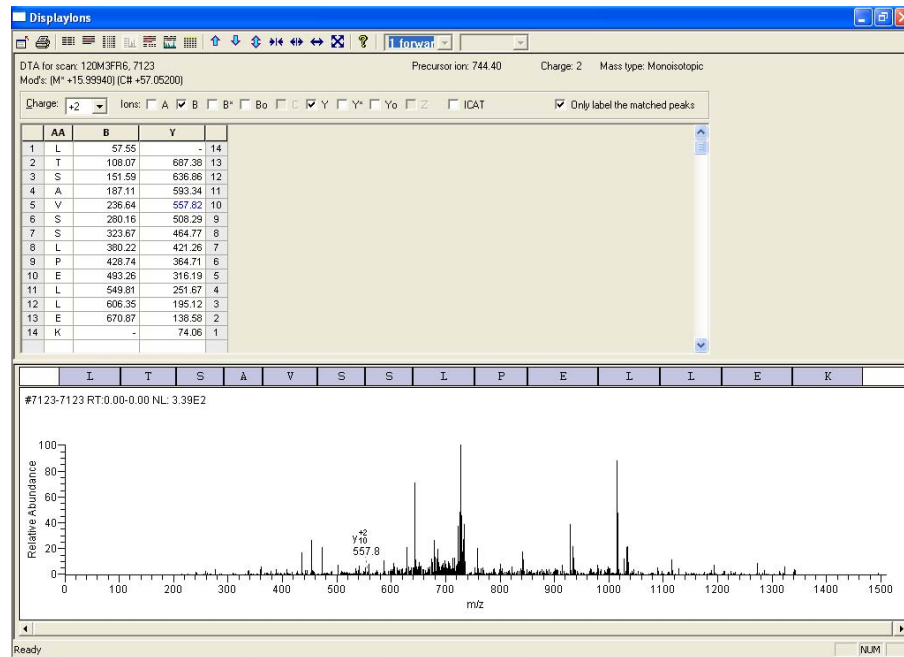

# KLVINGKPIITFQERD

IPI00123176.1, IPI00135284.1, IPI00271869.1, IPI00273646.8, IPI00319731.1,  
 IPI00355793.6, IPI00399459.1, IPI00462075.4, IPI00462605.4, IPI00470025.4,  
 IPI00606543.3, IPI00621121.1, IPI00621491.1, IPI00622433.4, IPI00622550.2,  
 IPI00622795.2, IPI00624632.1, IPI00625313.4, IPI00663957.1, IPI00668276.2,  
 IPI00753028.1, IPI00754317.1, IPI00758168.1, IPI00761479.1, IPI00762304.1

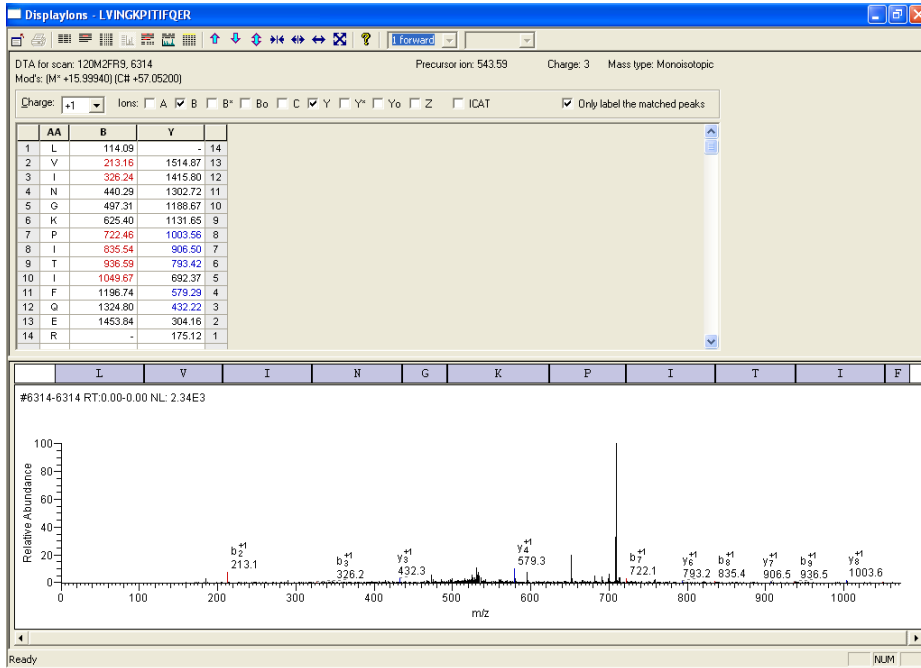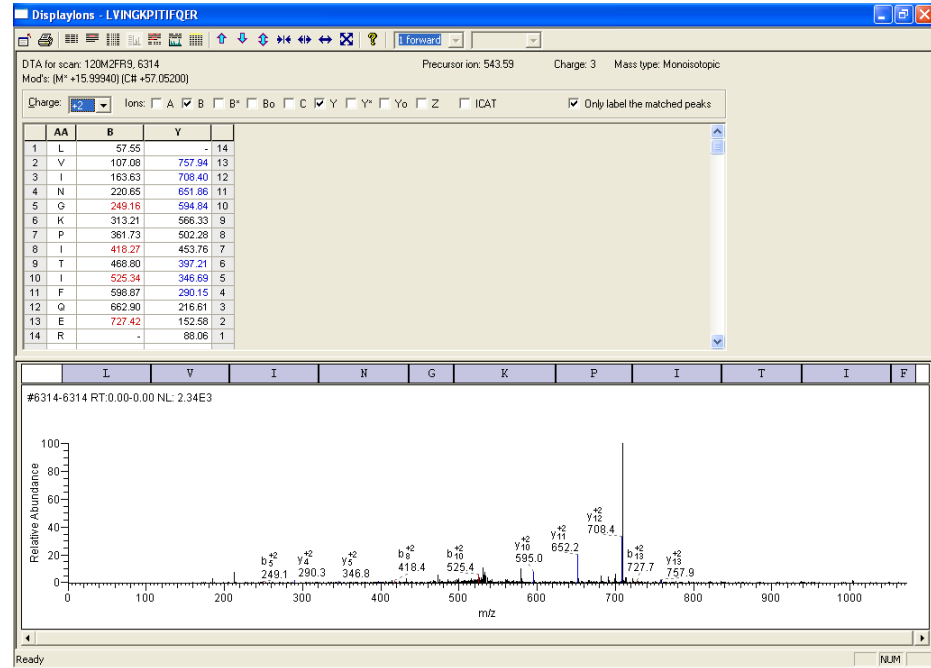

# KLVINGKPITIFQERD

IPI00123176.1, IPI00135284.1, IPI00271869.1, IPI00273646.8, IPI00319731.1,  
 IPI00355793.6, IPI00399459.1, IPI00462075.4, IPI00462605.4, IPI00470025.4,  
 IPI00606543.3, IPI00621121.1, IPI00621491.1, IPI00622433.4, IPI00622550.2,  
 IPI00622795.2, IPI00624632.1, IPI00625313.4, IPI00663957.1, IPI00668276.2,  
 IPI00753028.1, IPI00754317.1, IPI00758168.1, IPI00761479.1, IPI00762304.1

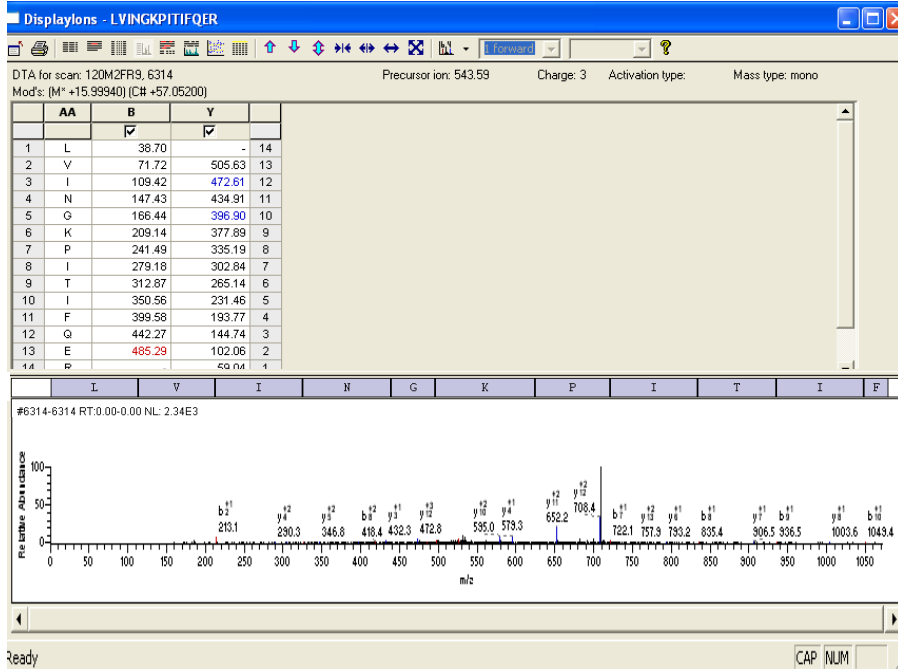

# KLYTLVLTDPAPSRK

## IPI00137730.6

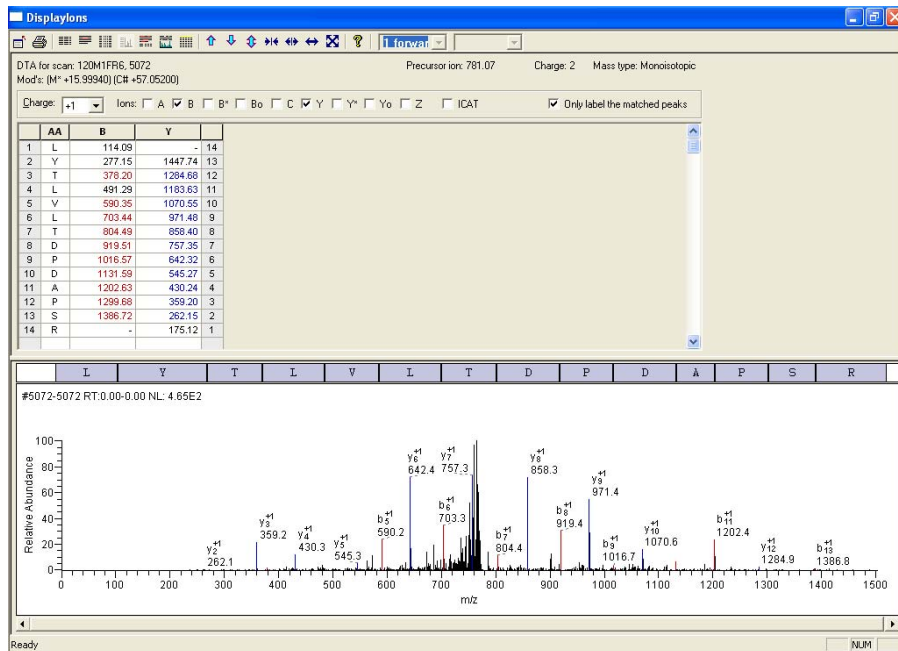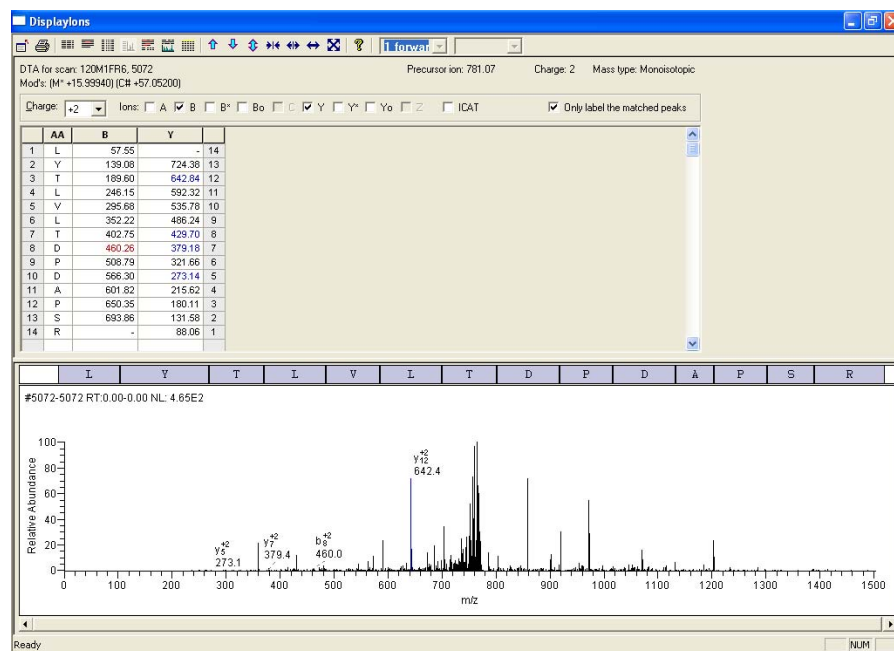



# KMEIDDLSSNAEAIKAKG IPI00265380.4

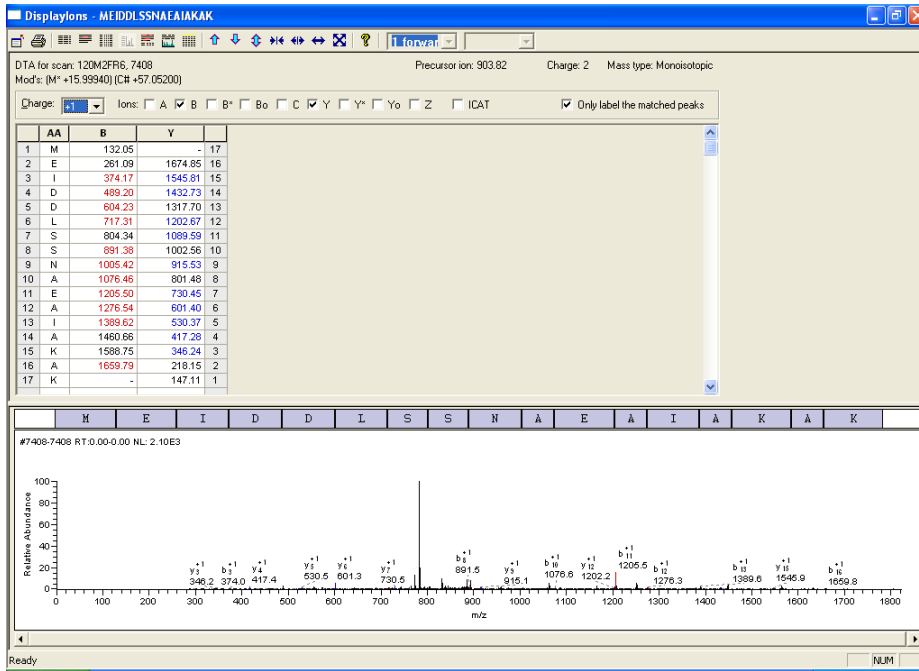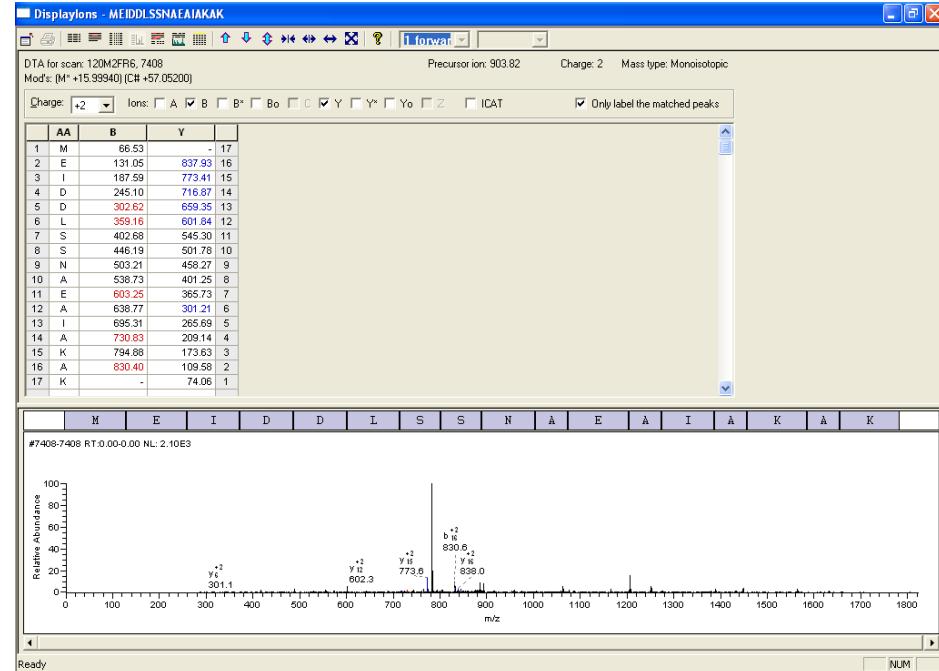

# KNEPQNAAGAPGRT

## IPI00224518.2, IPI00404579.1

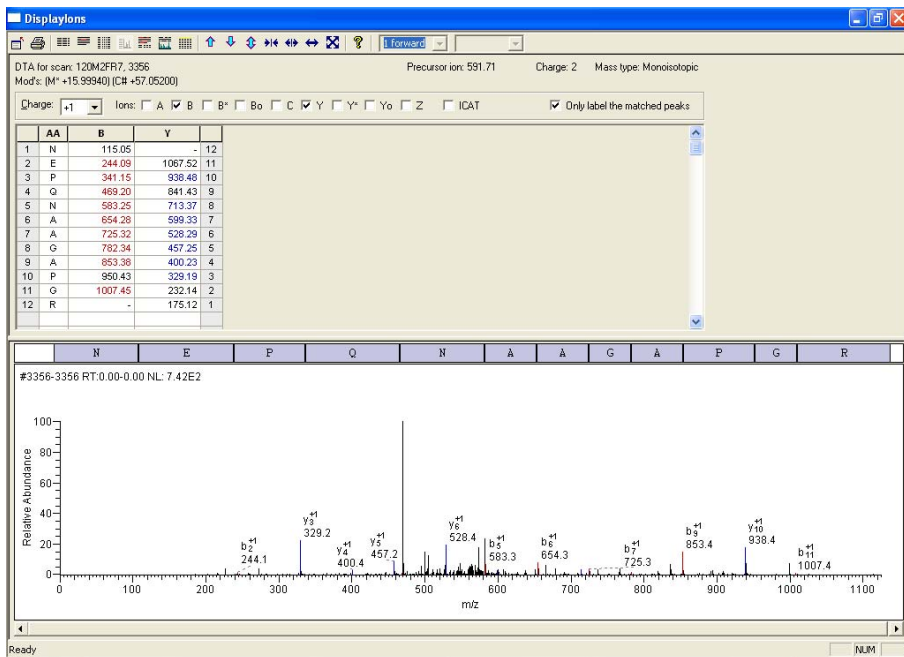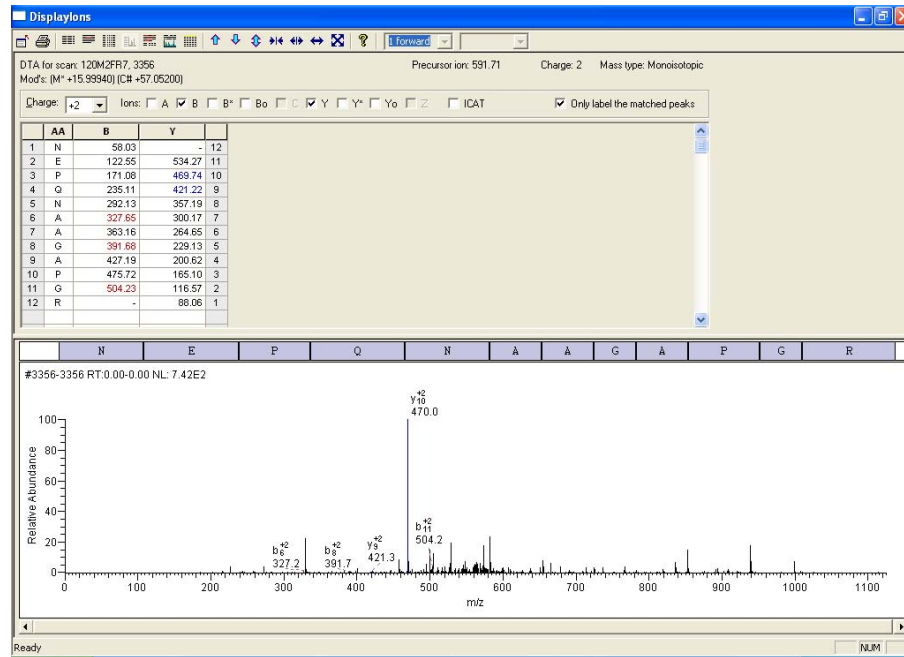

# KNNASTDYDLSDKS

IPI00321170.7, IPI00458105.1, IPI00605077.1, IPI00749579.1, IPI00751485.1,  
 IPI00752359.1, IPI00753623.1, IPI00753883.1, IPI00754157.1, IPI00754487.1,  
 IPI00755309.1, IPI00762363.1

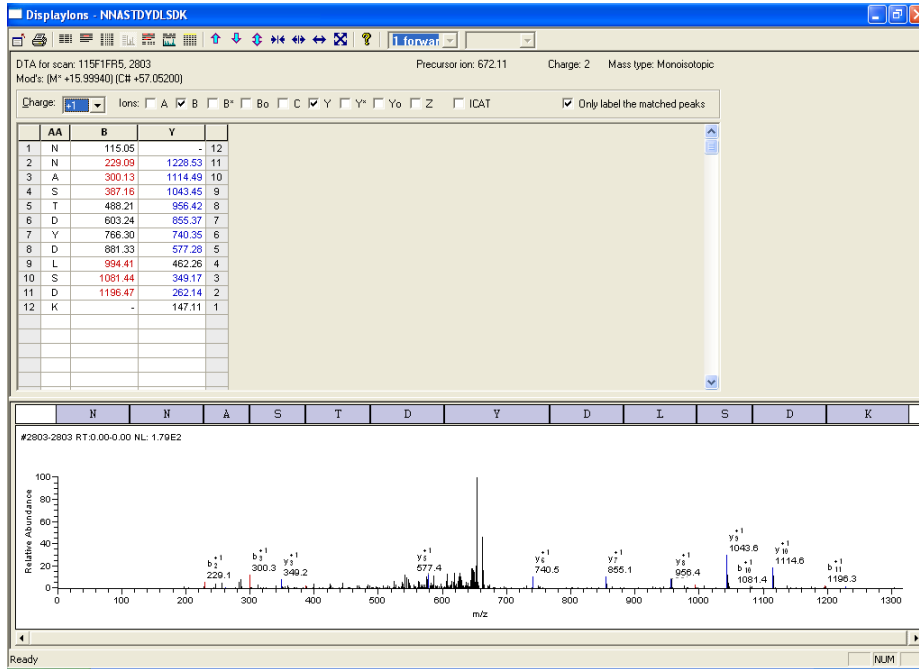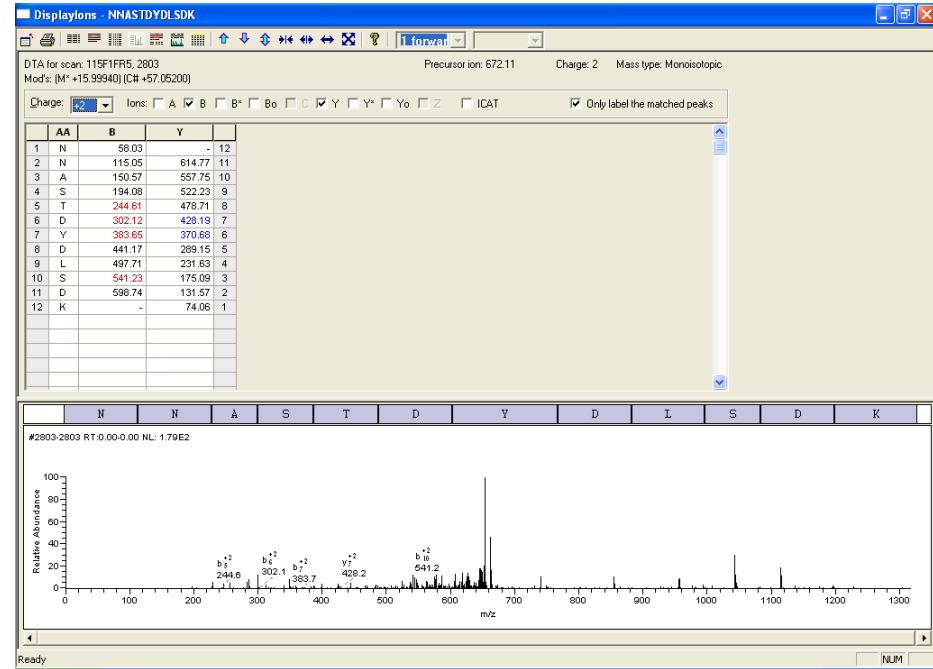

# KNSDEADLVPAKE IPI00129466.1

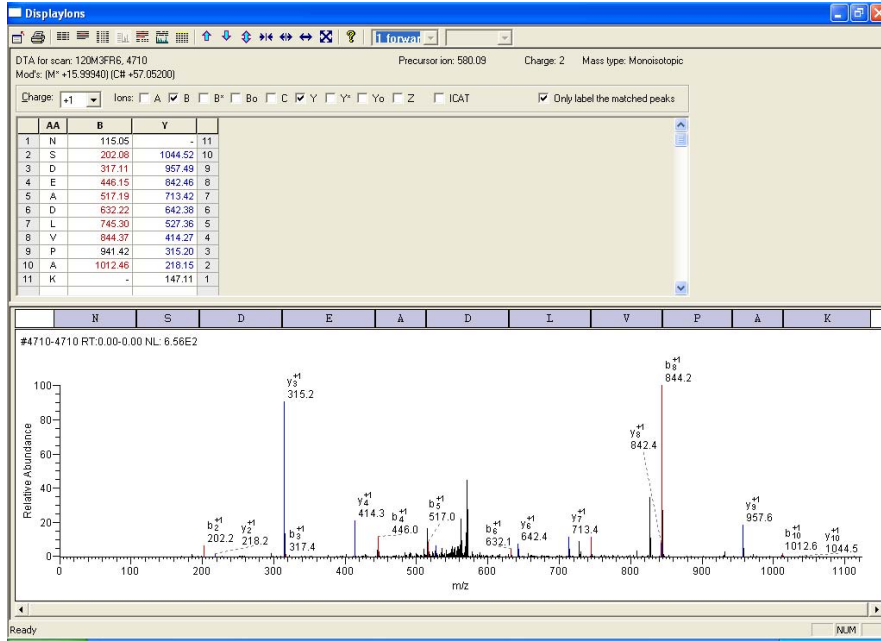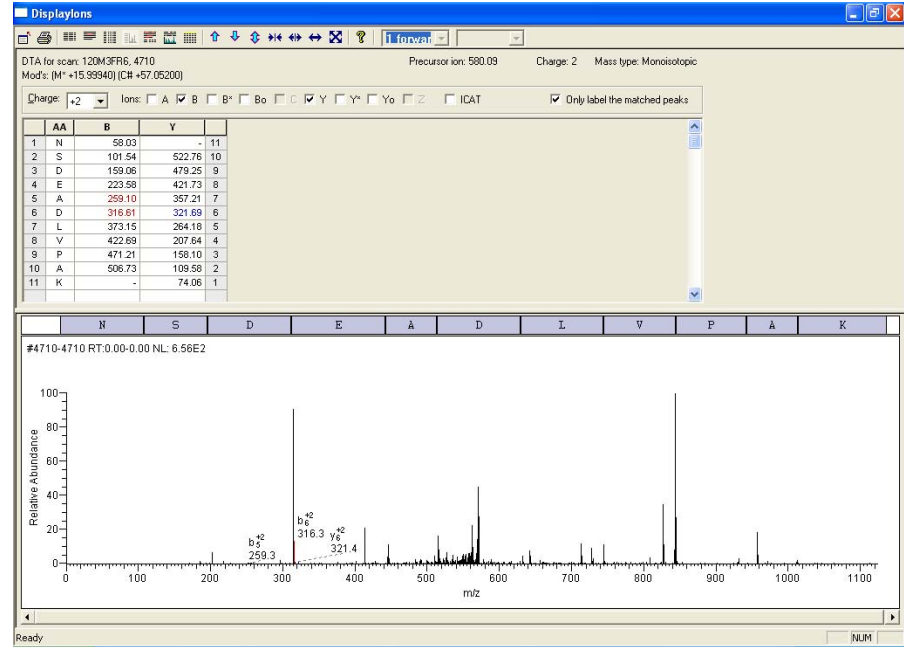

# KNSVVEASEAAYKE IPI00227392.4

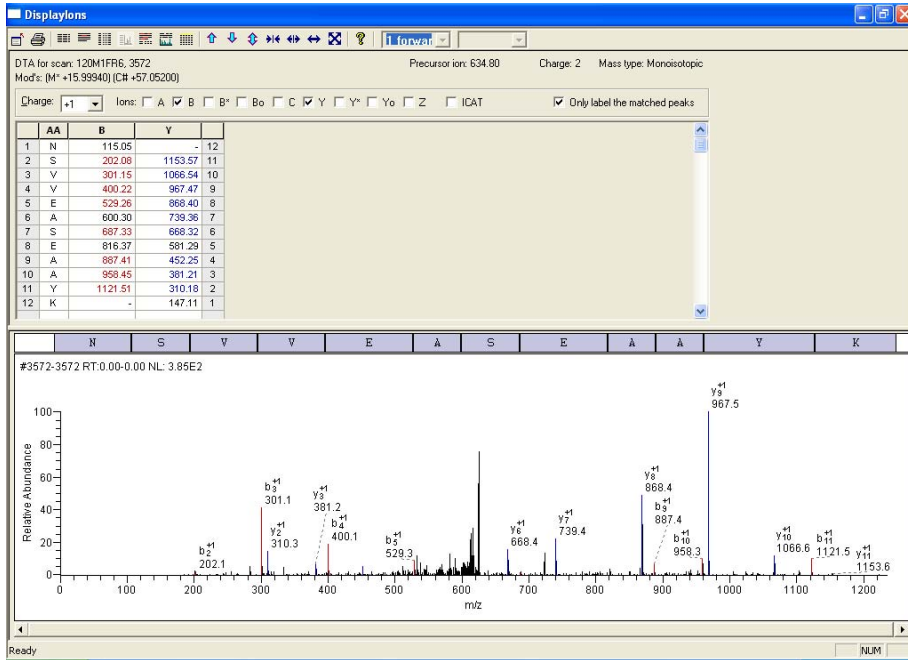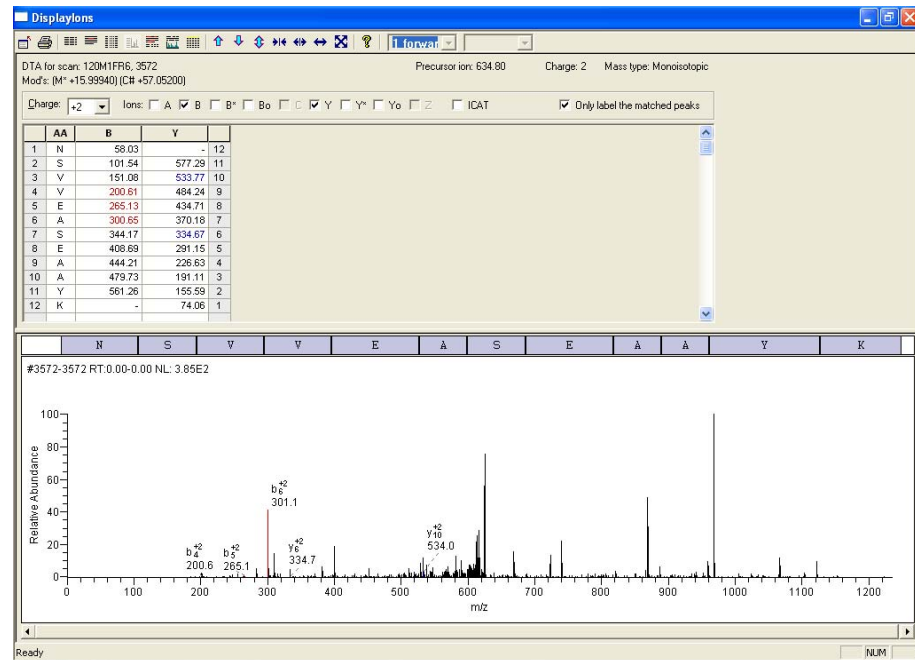

# KNVTELNEPLSNEERN IPI00230707.5

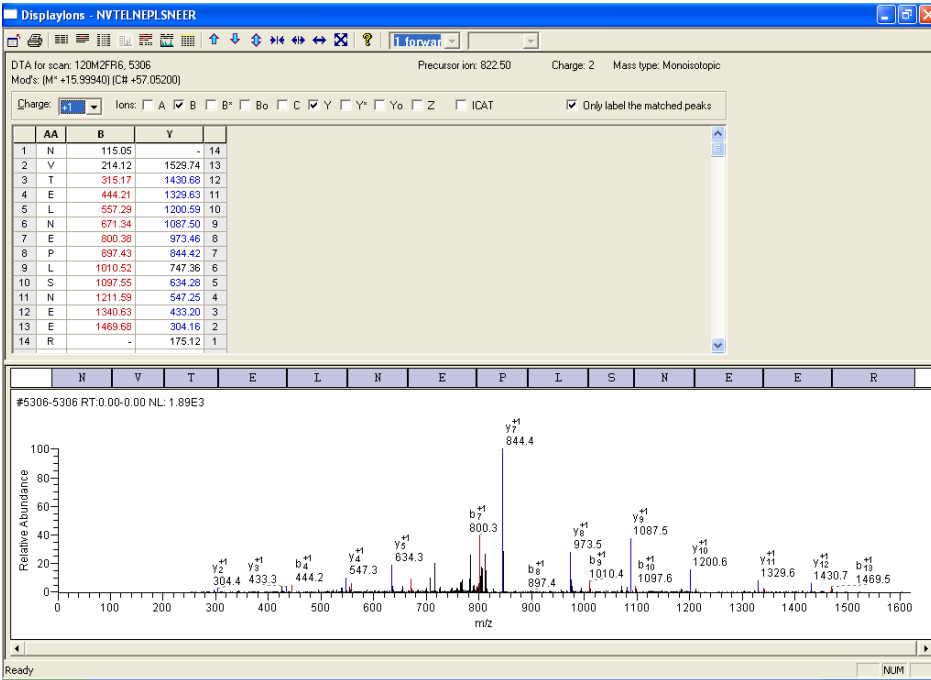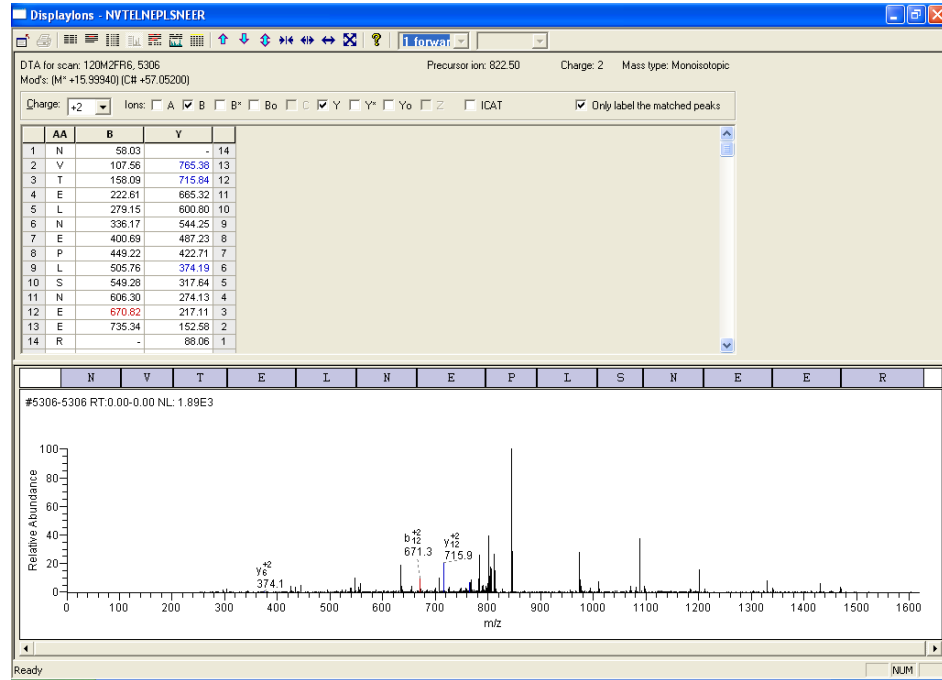

# KNYTDDAIETDDLTIKL IPI00131406.1

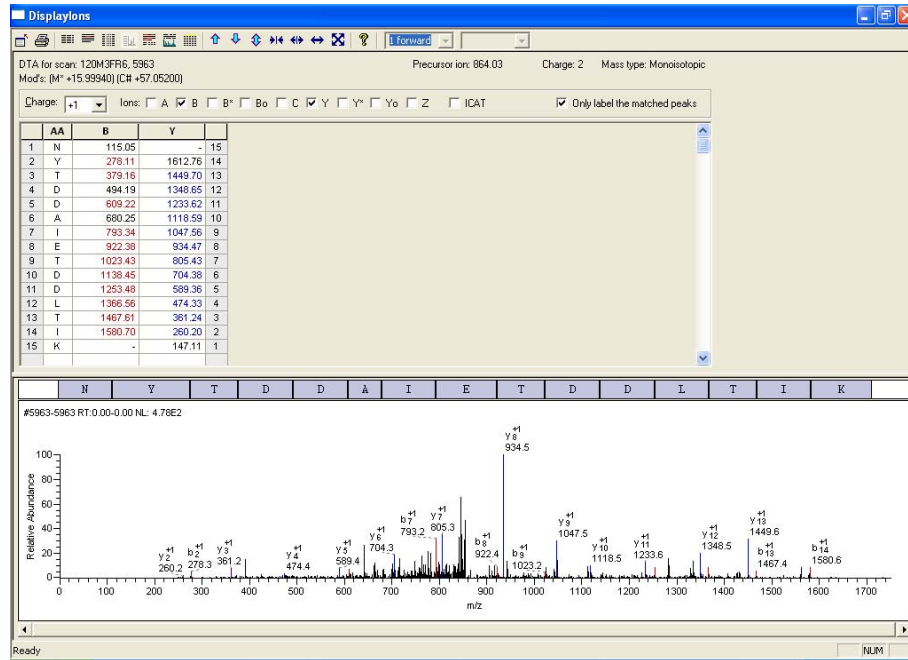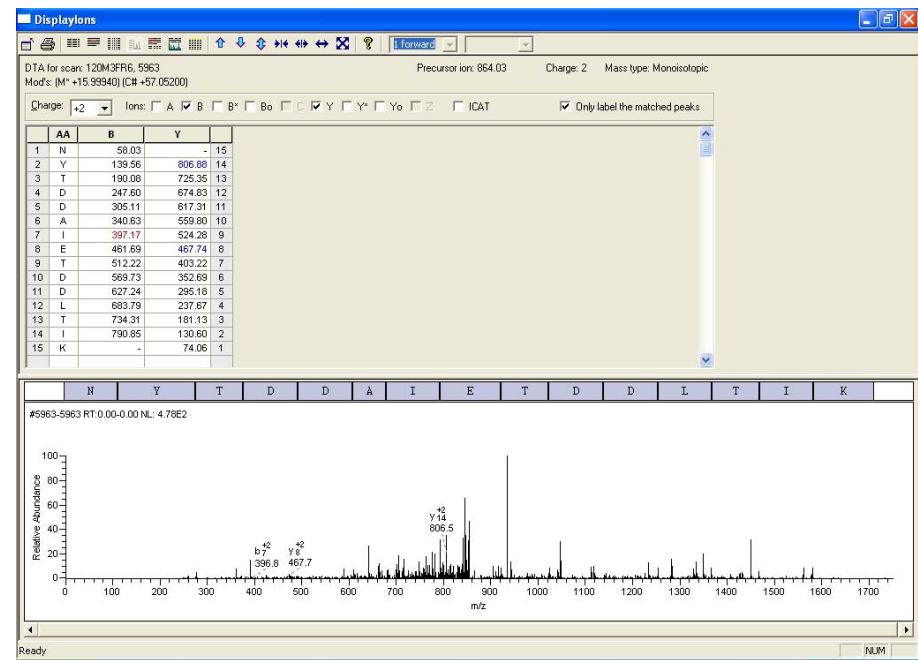

# KSEEEQSSASVKK

IPI00130343.1, IPI00223443.1, IPI00223444.1, IPI00759870.1, IPI00759886.1,  
IPI00762002.1

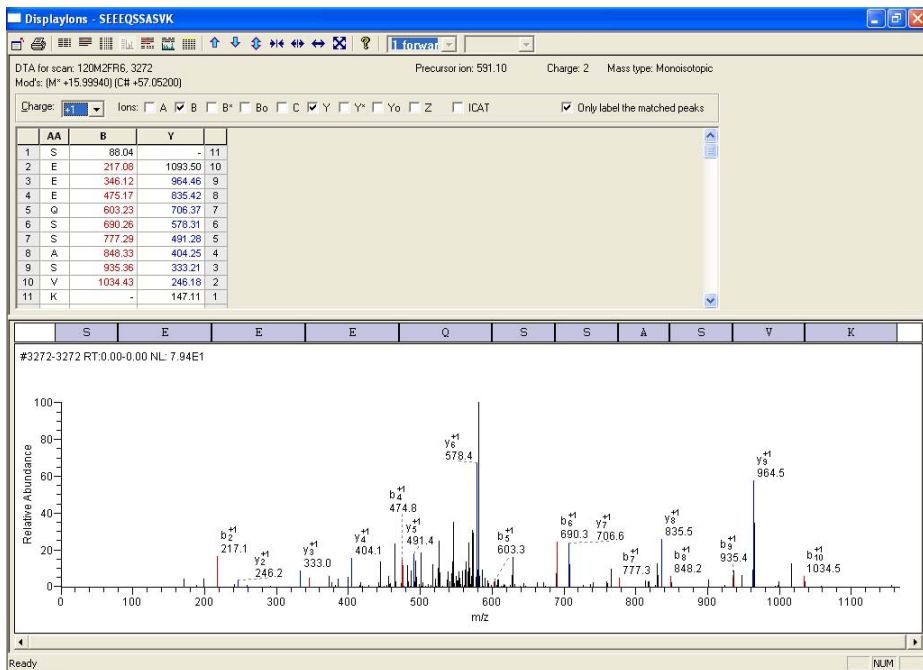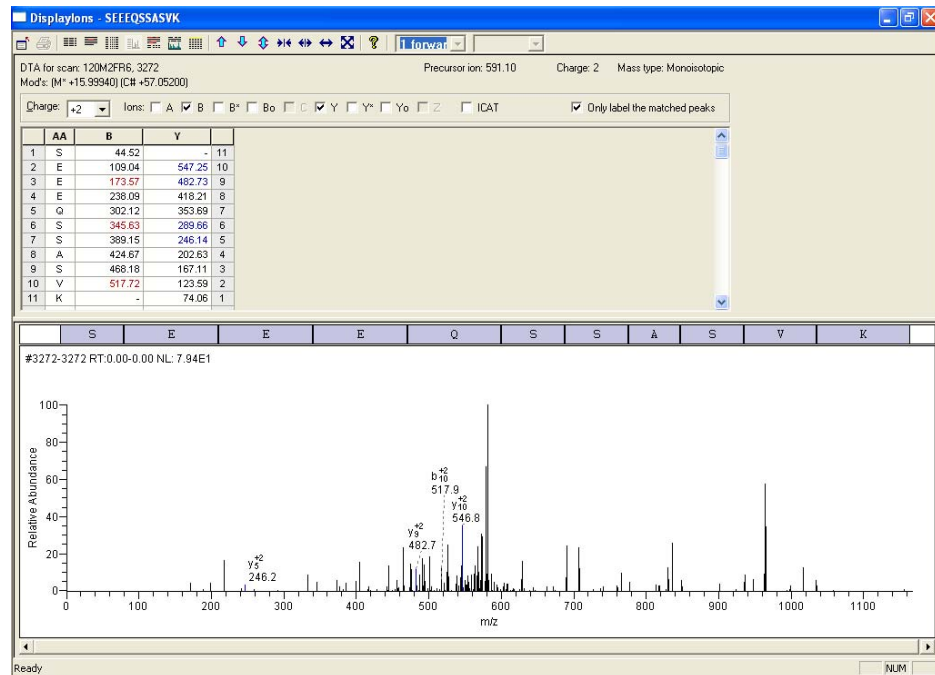



# KSESPKEPEQLRK

IPI00129808.7, IPI00469298.2, IPI00620806.3, IPI00664195.1

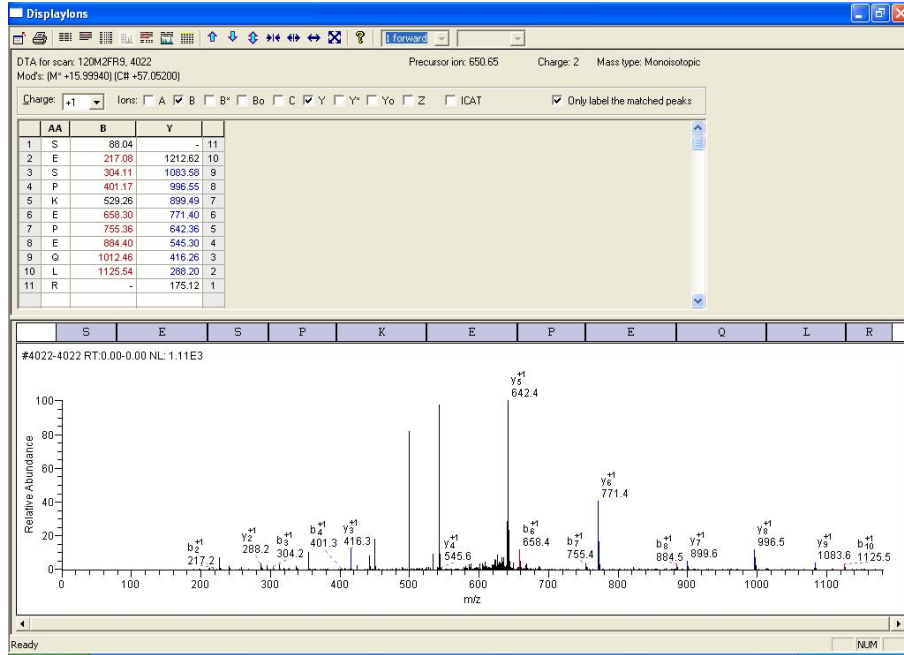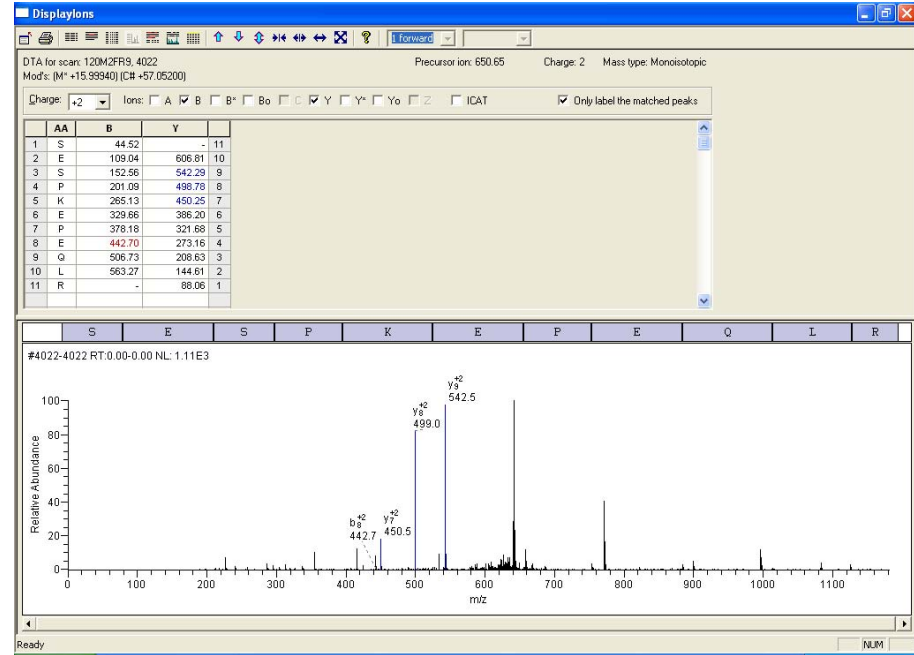

# KSGEIEPVSVKV

## IPI00120045.1, IPI00120047.1, IPI00263863.7

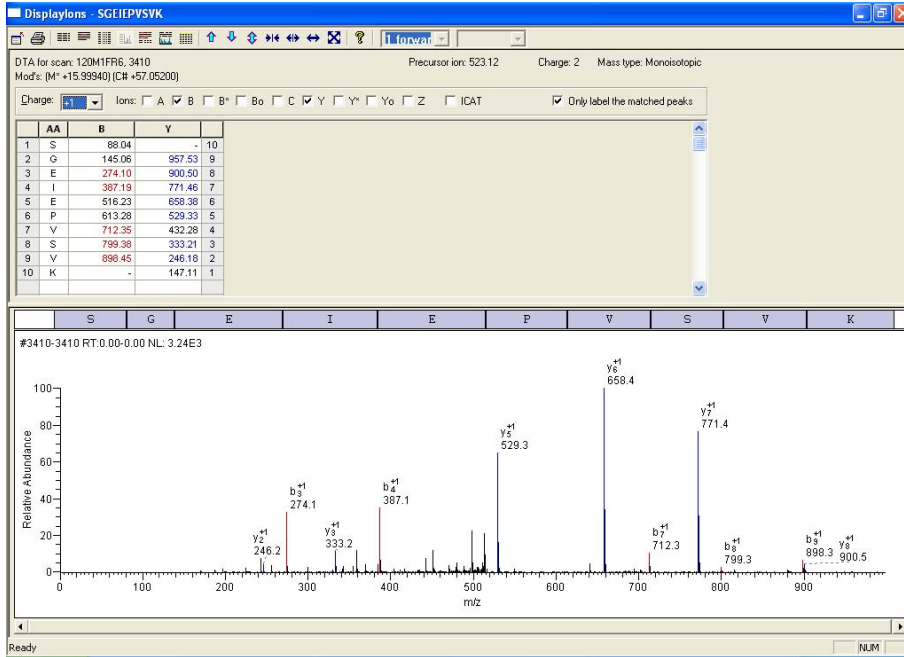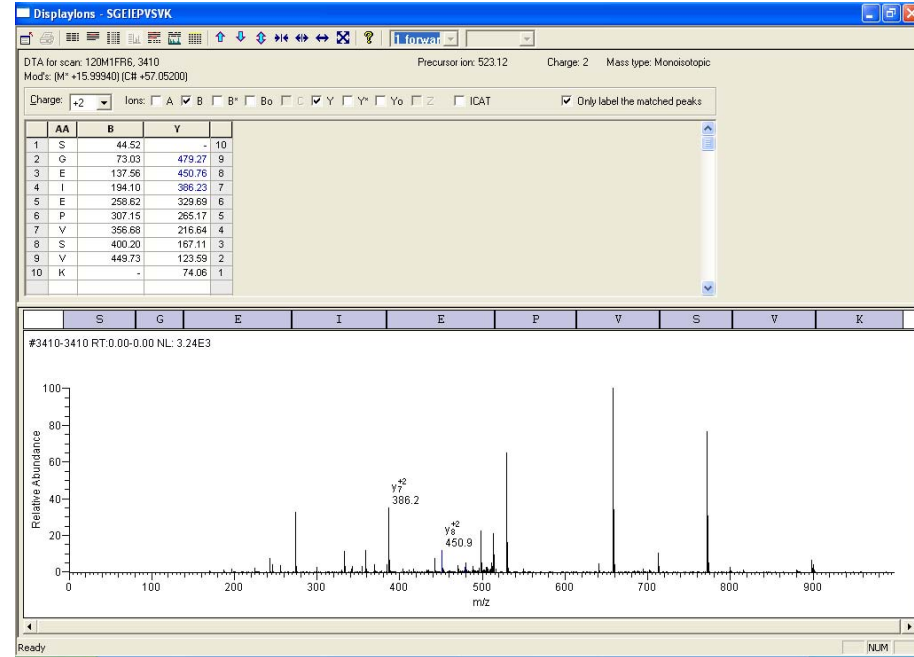

# KSSSNTVESTSLYNKV

## IPI00339916.7, IPI00673707.2

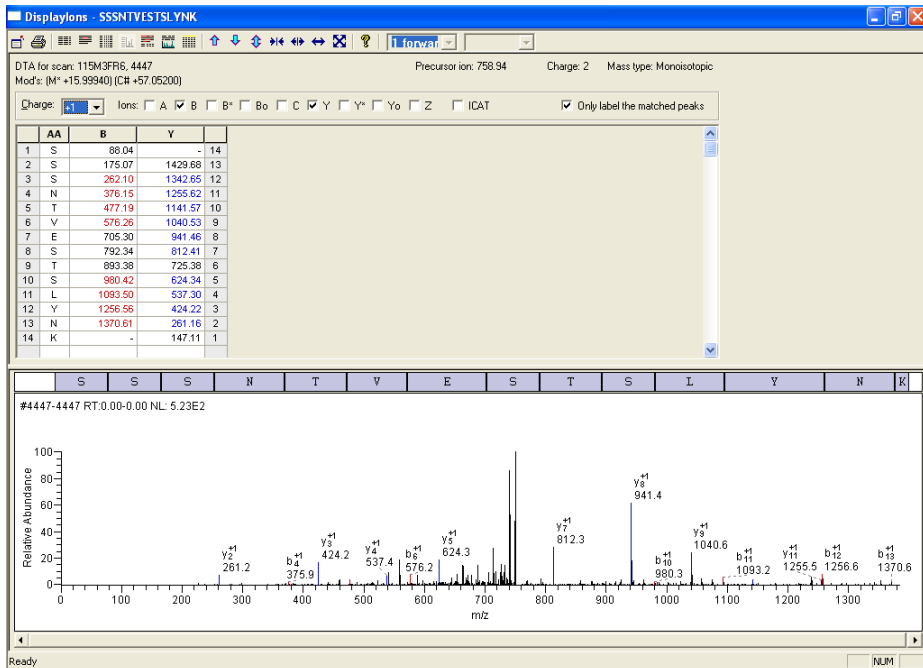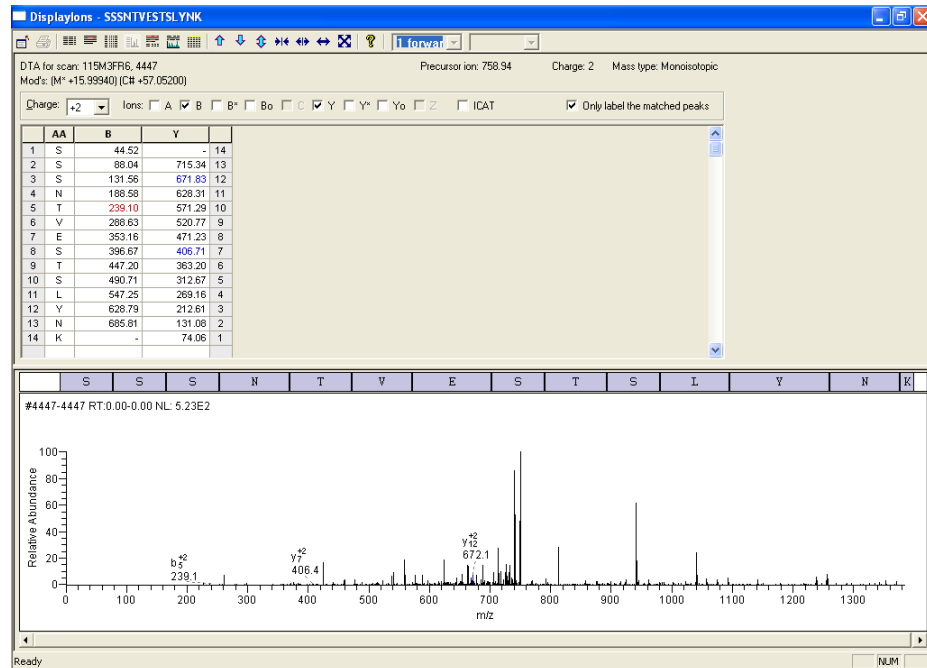

# KSTESLQANVQRL

IPI00134097.1, IPI00224505.6, IPI00625838.4, IPI00653474.1, IPI00667008.2,  
IPI00761637.1

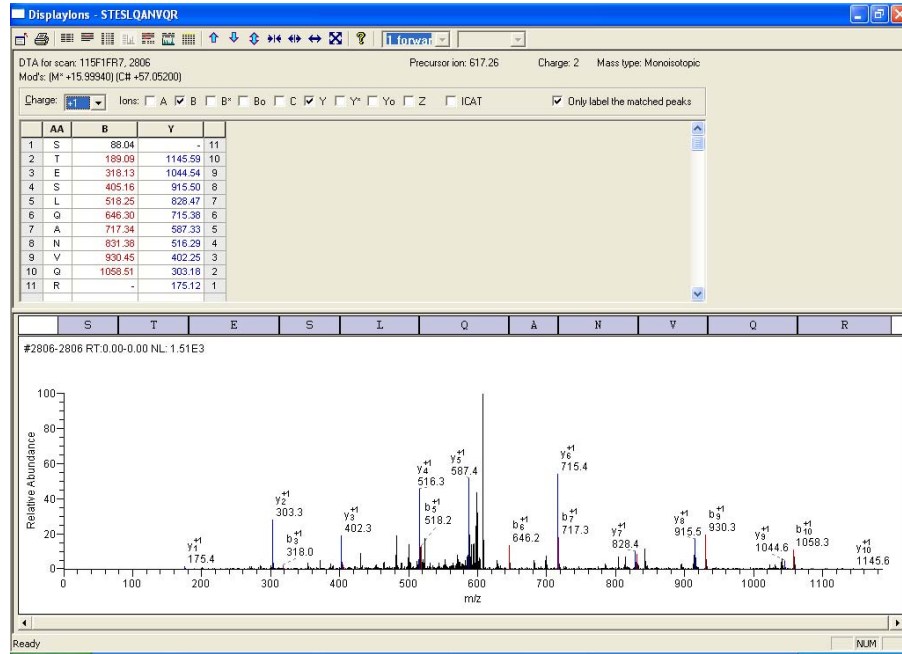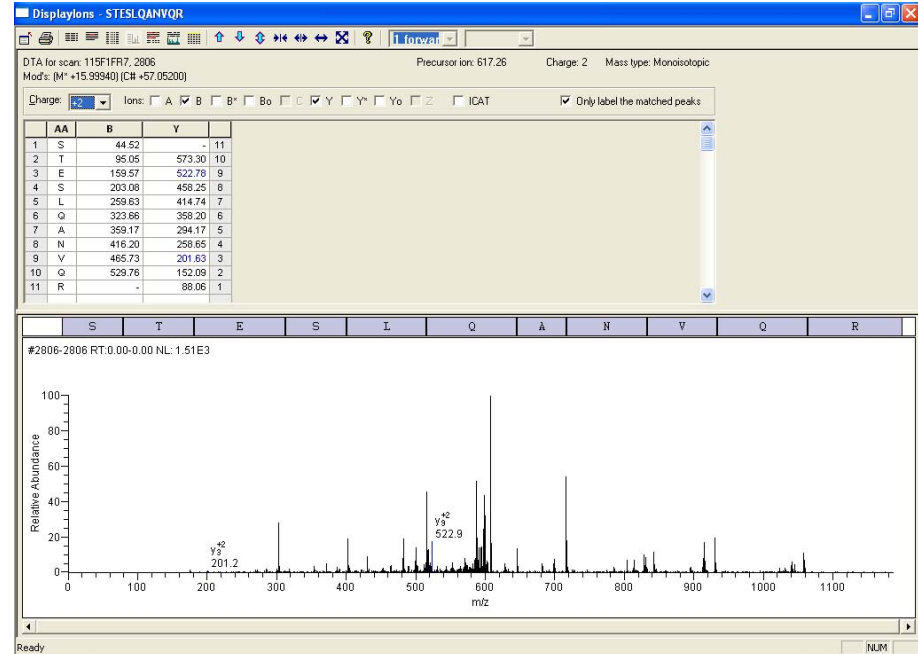

# KSTFVLDEFKRK

IPI00318841.3, IPI00355863.5, IPI00408350.1, IPI00467651.4, IPI00664589.1

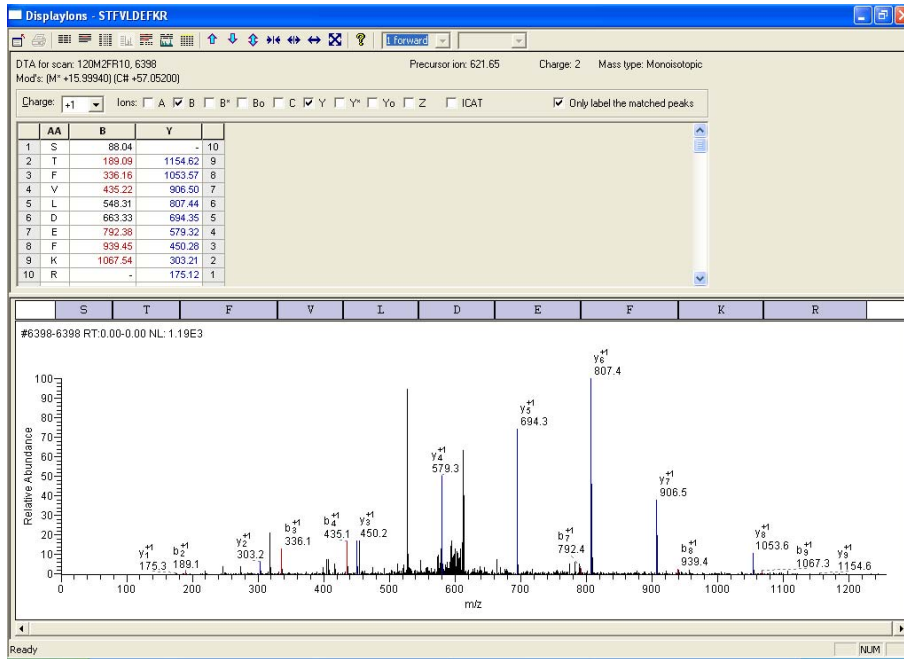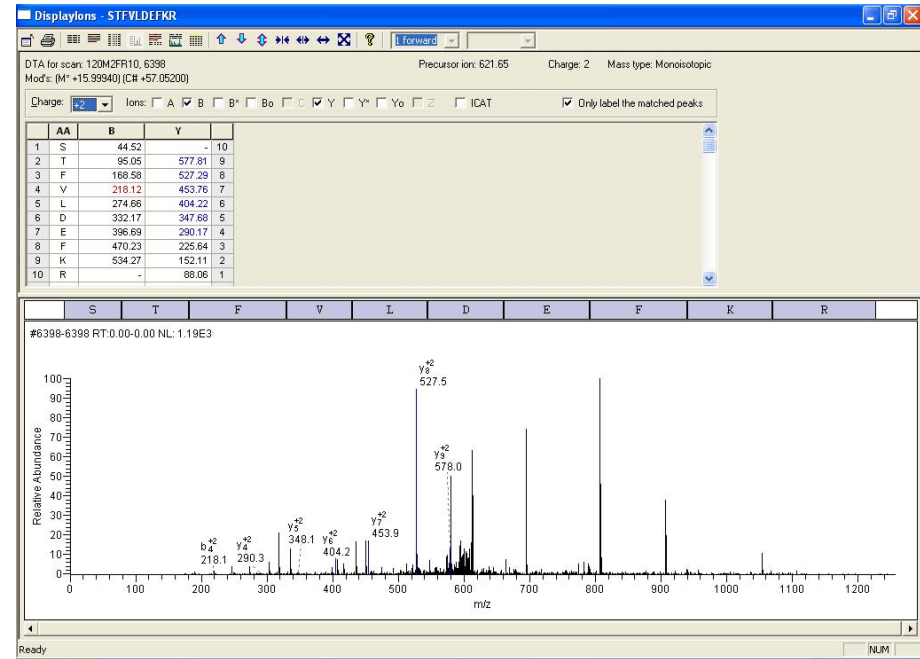

# KSVTEQGAELSNEERN

## IPI00116498.1, IPI00473203.1

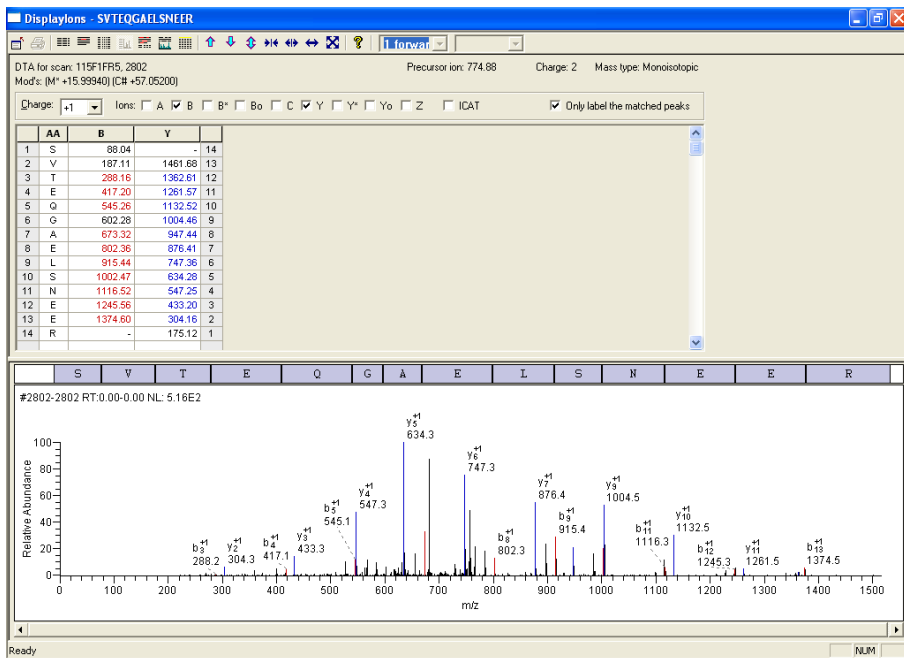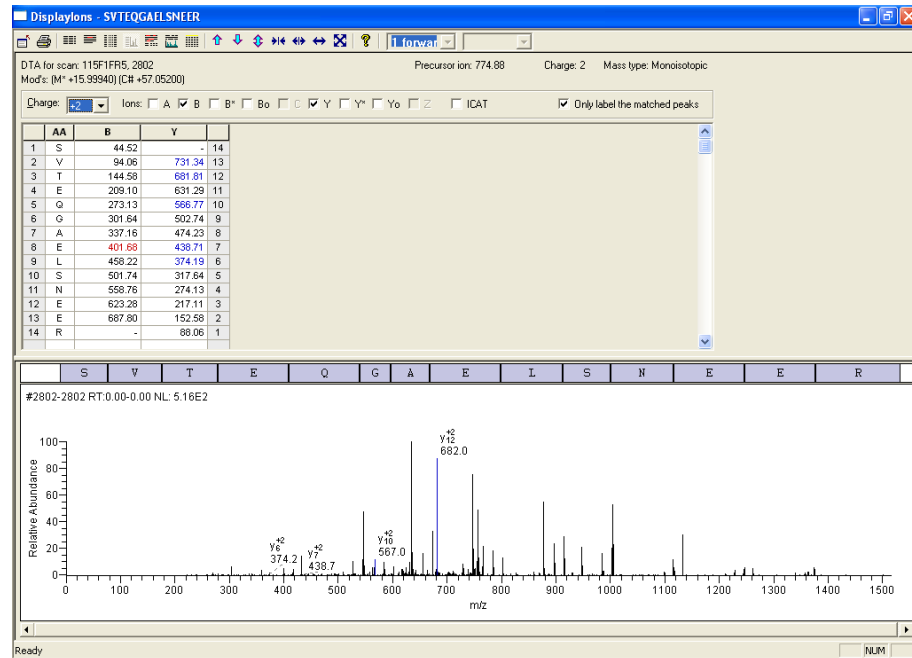

# KSYELPDGQVITIGNERF

IPI00110827.1, IPI00110850.1, IPI00110851.1, IPI00114593.1, IPI00117043.1,  
 IPI00136929.1, IPI00266875.5, IPI00404804.1, IPI00473320.2, IPI00480406.1,  
 IPI00605347.3, IPI00648420.1, IPI00652436.2, IPI00653007.1, IPI00654242.1,  
 IPI00655182.1, IPI00751076.1

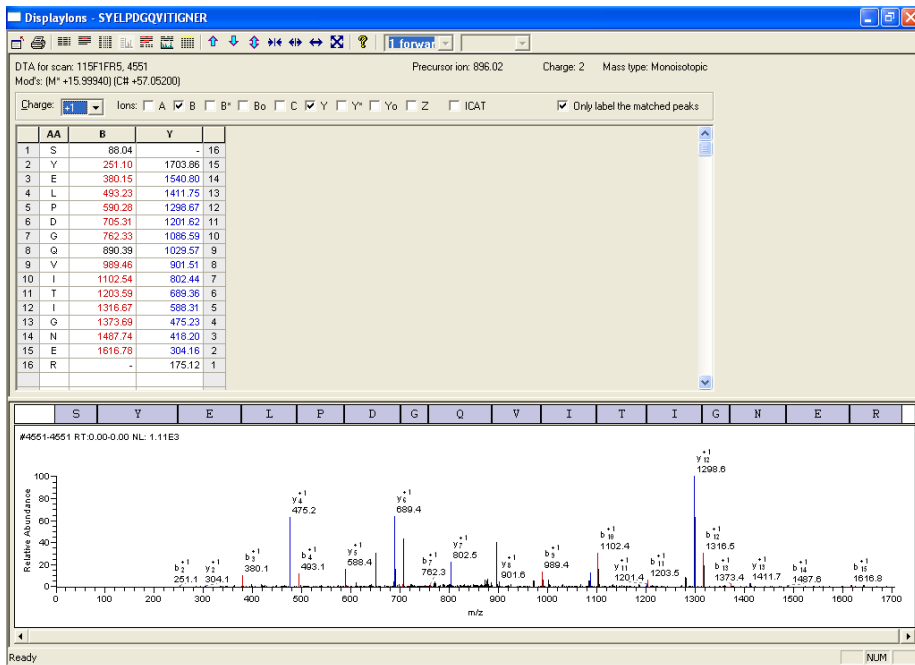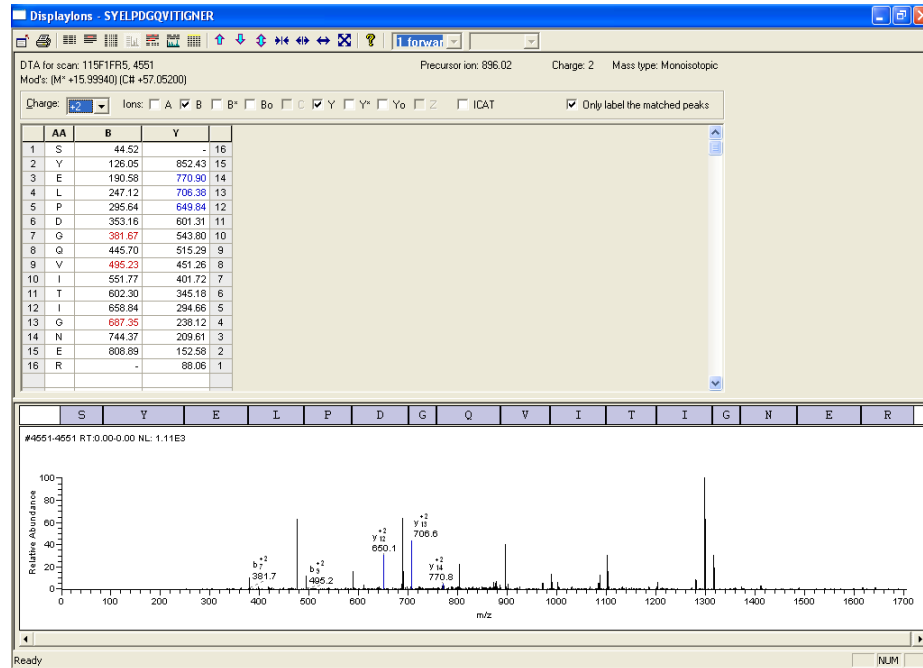

# KTAPYVVTGSDQTVKV

## IPI00309207.4, IPI00755990.1

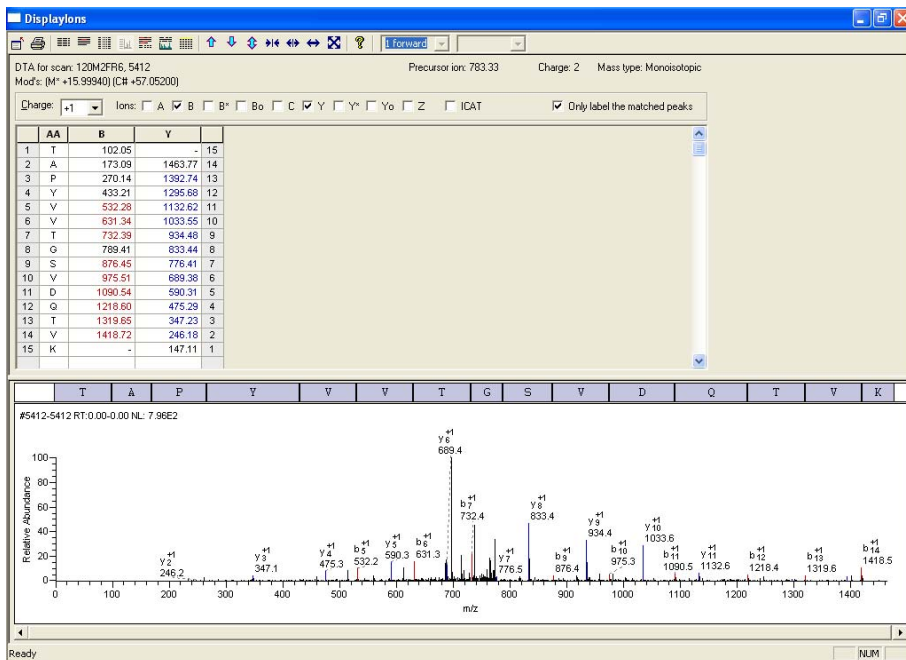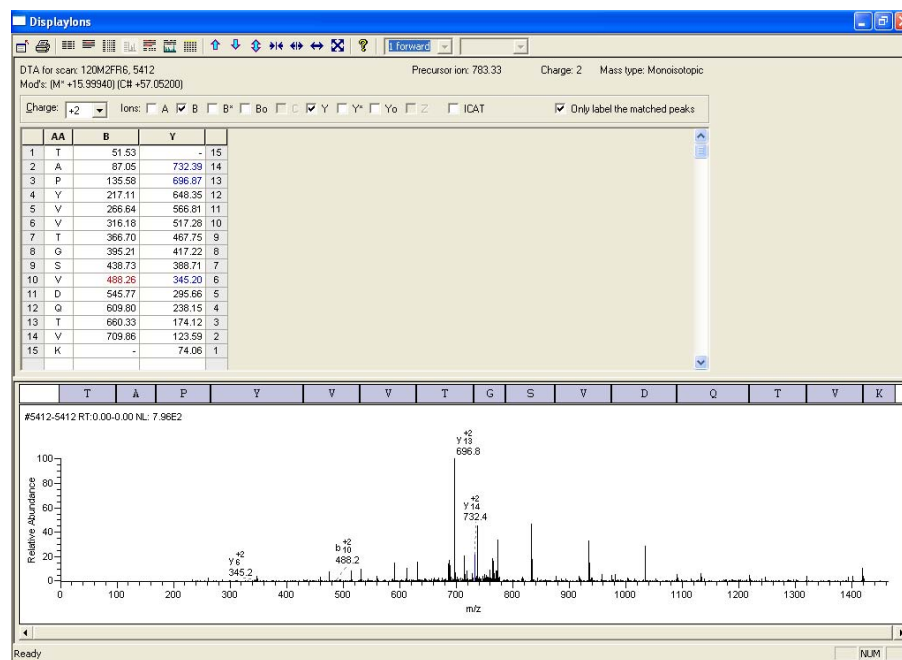



# KTASNVEEAFINTAKE IPI00137227.1

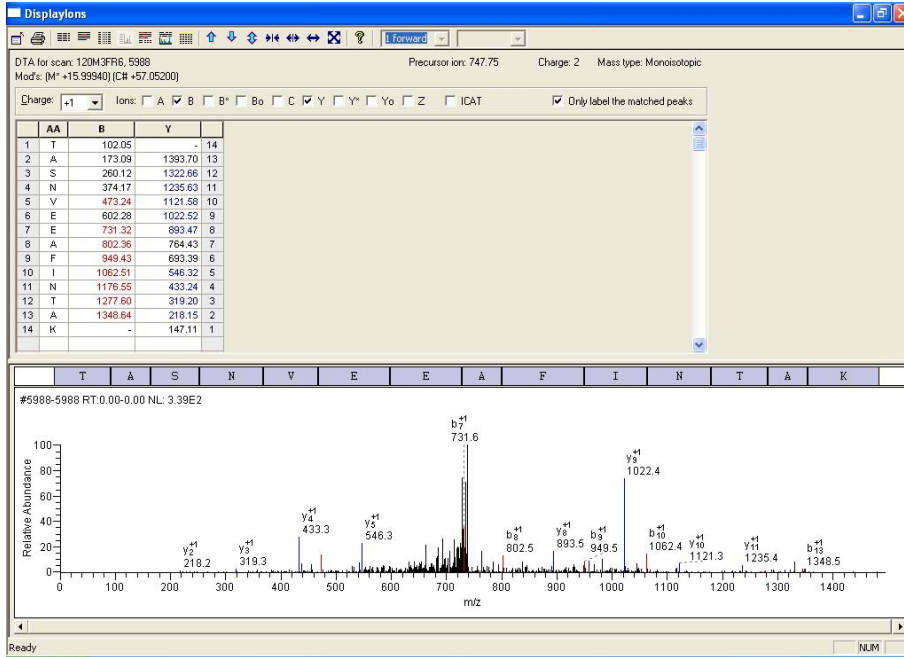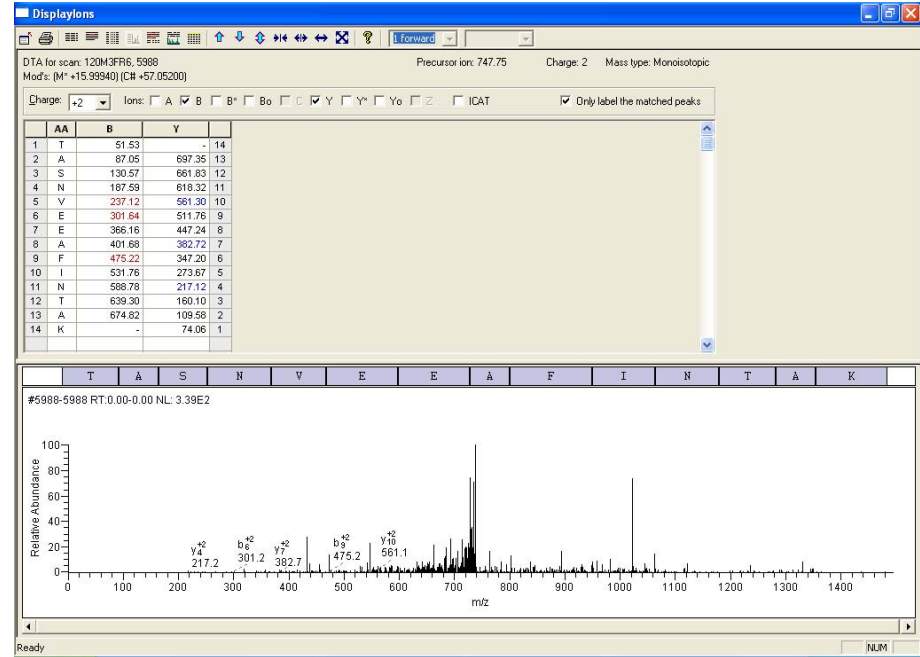

# KTGAEGAVLDEAKN

IPI00109420.2, IPI00124954.1, IPI00421137.3, IPI00555125.1, IPI00753326.1

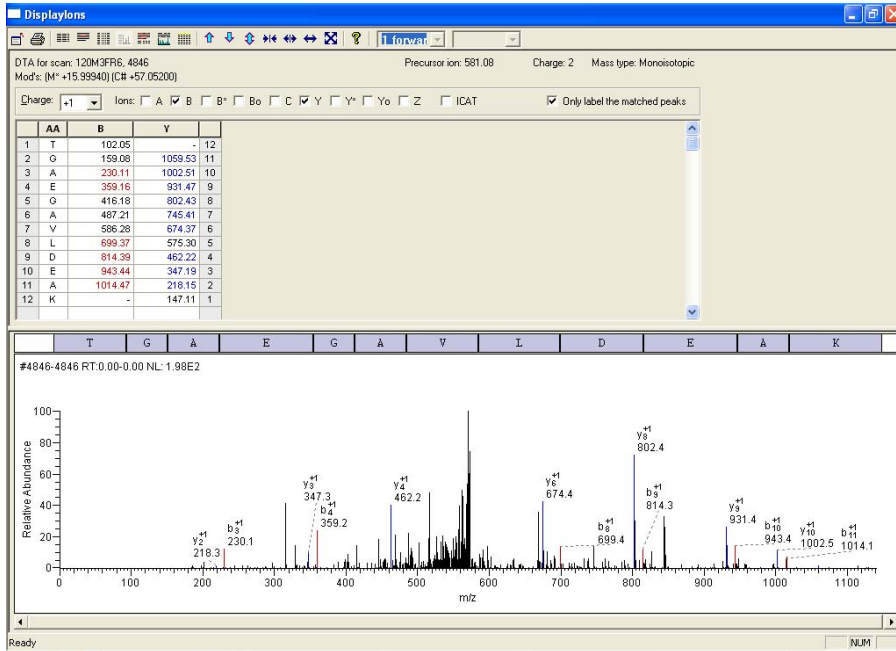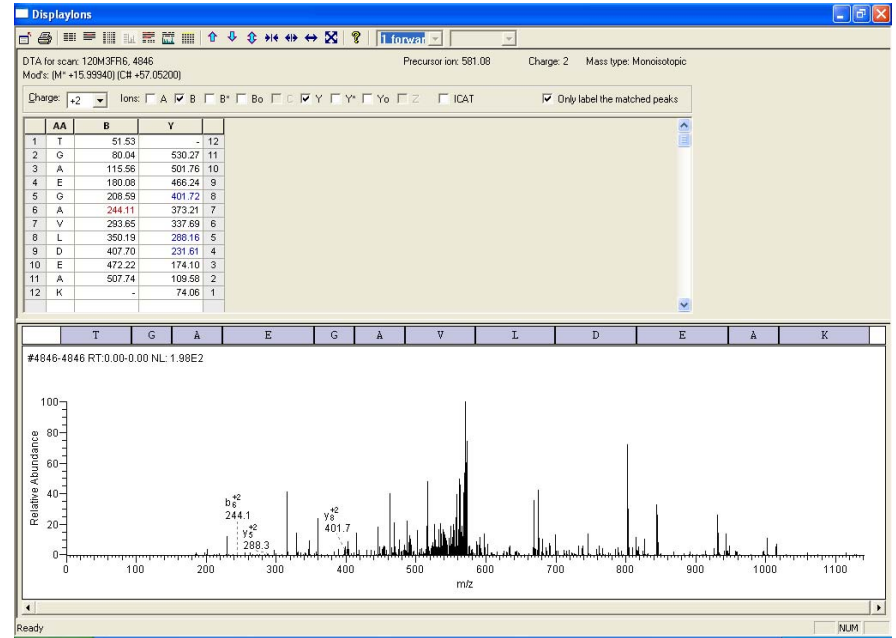

# KTGQEVVFVAEPDNKN

IPI00475154.1, IPI00754992.1, IPI00761660.1

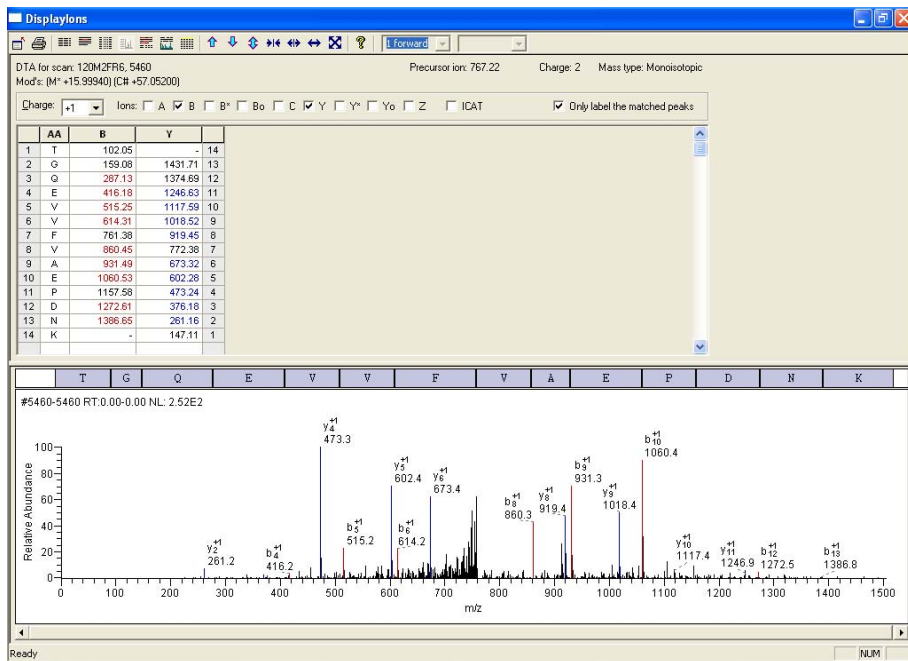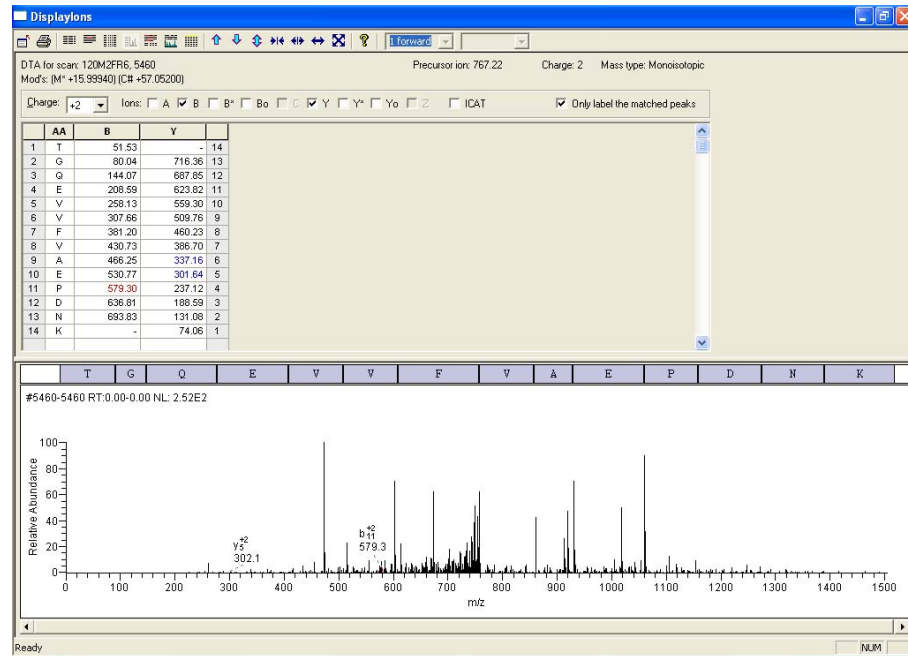

# KTIGVSNFNPLQIERI

## IPI00223757.3, IPI00663309.1

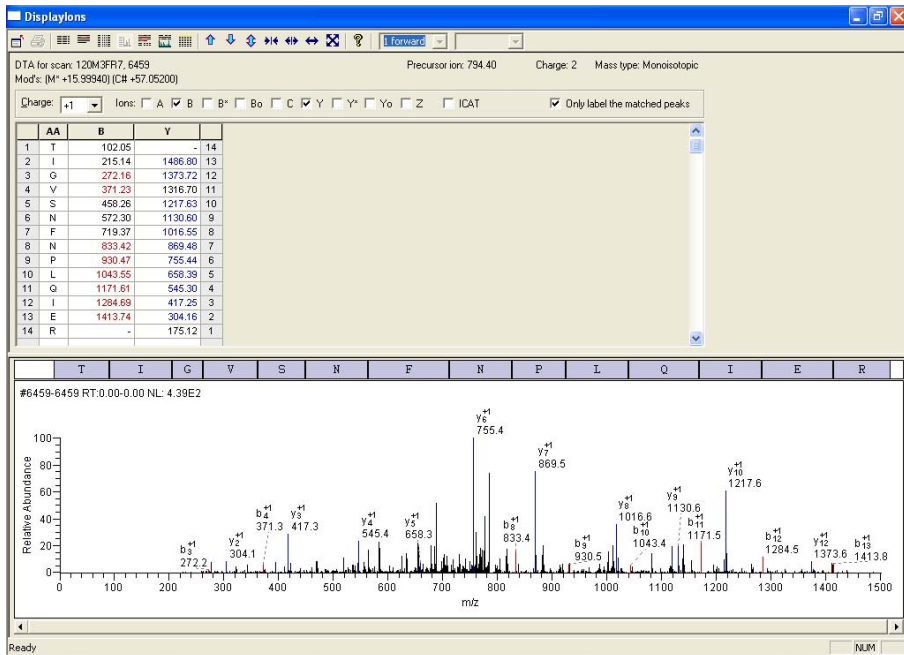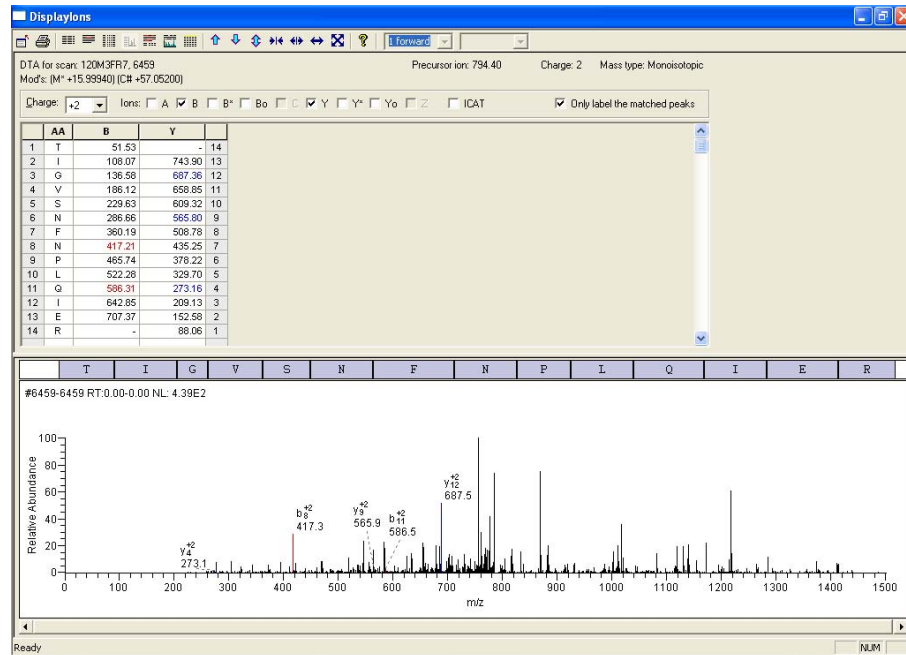

# KTIQVDNTDAEGRL IPI00331436.3

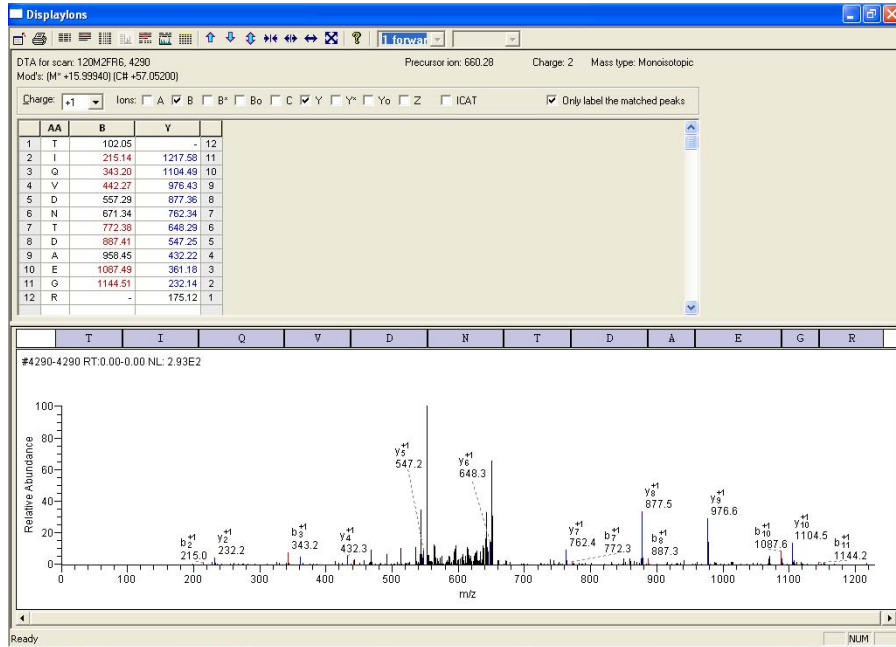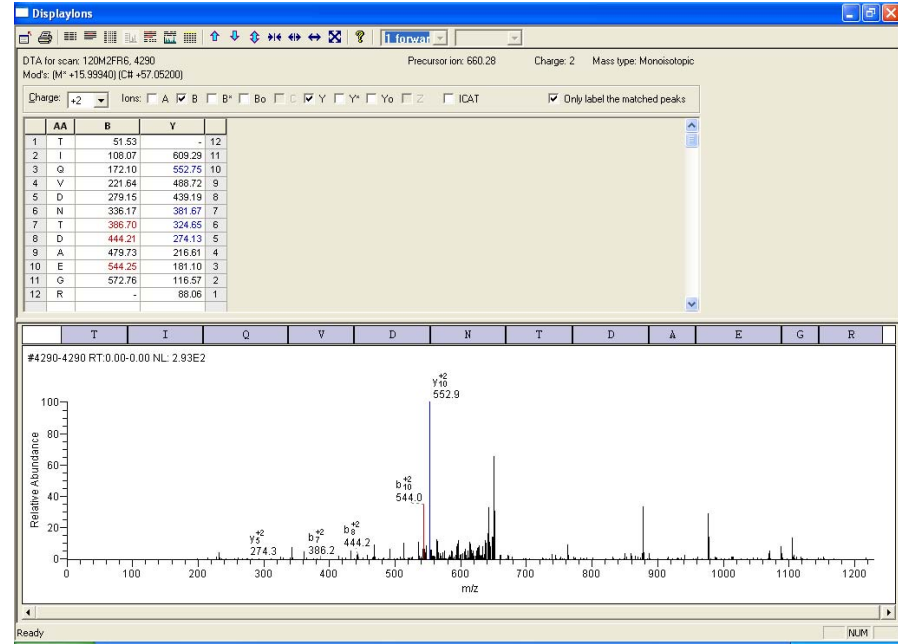

# KTLEEDDEELFKM IPI00321978.3

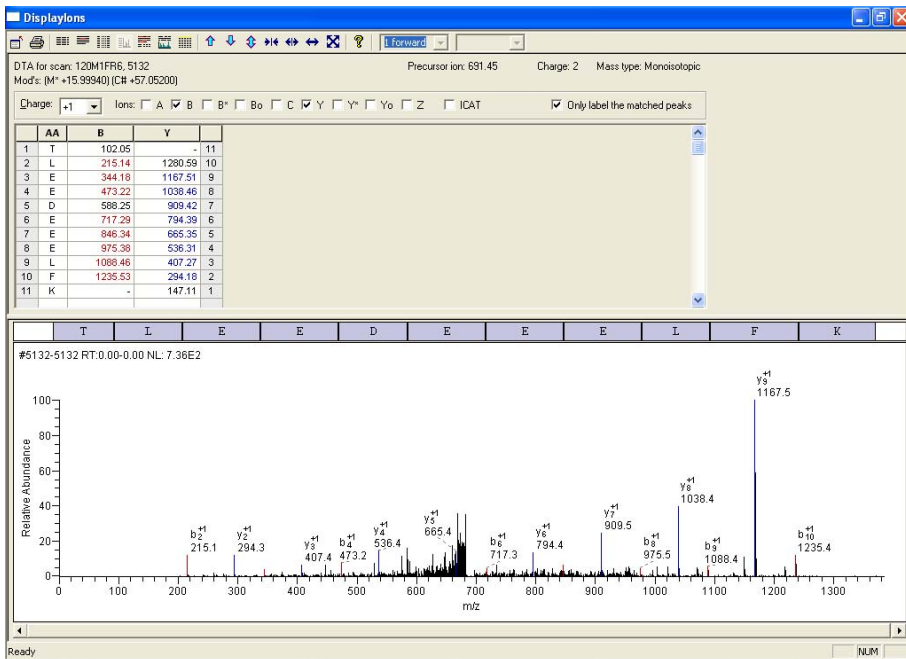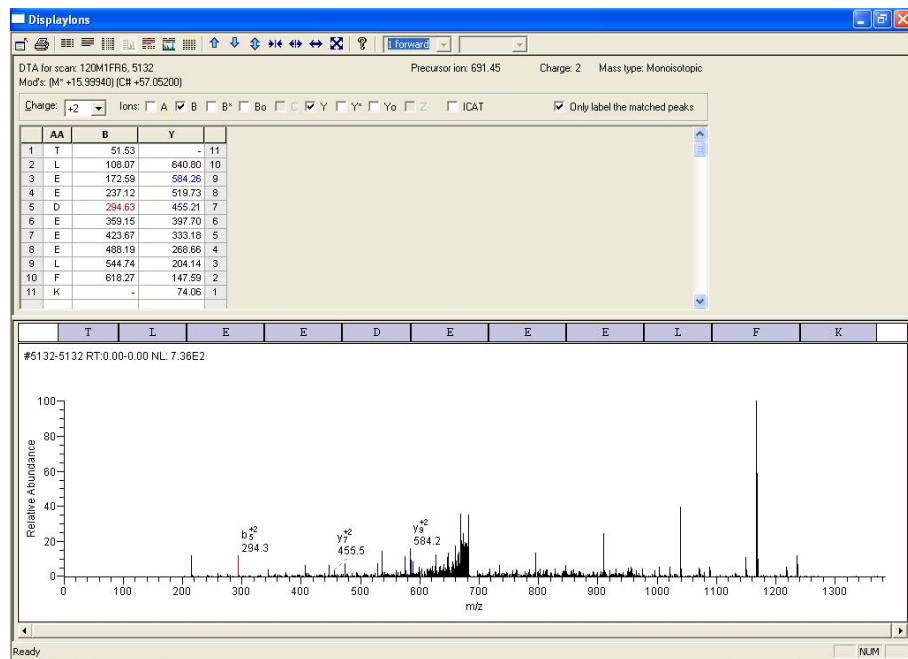

# KTLTTAAVSTAQPILSKL

## IPI00319270.2, IPI00666574.1

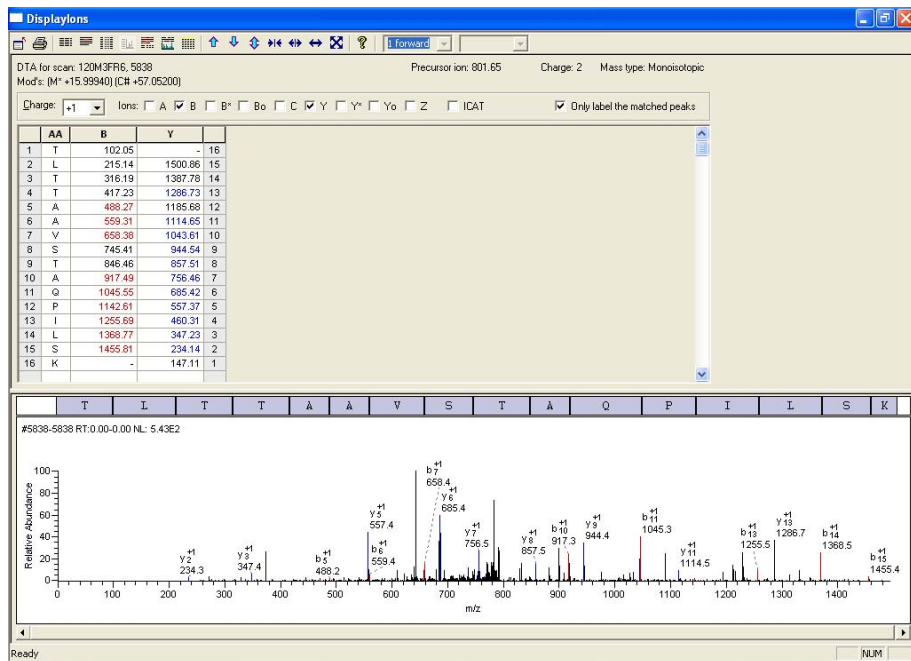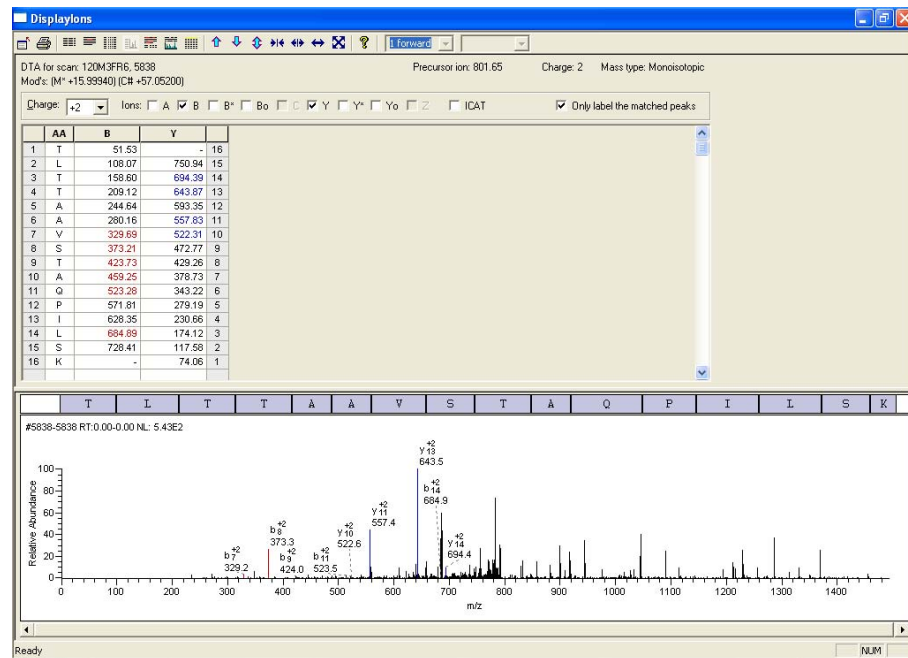

# KTNEAQAIETARA

## IPI00165854.3, IPI00379103.5

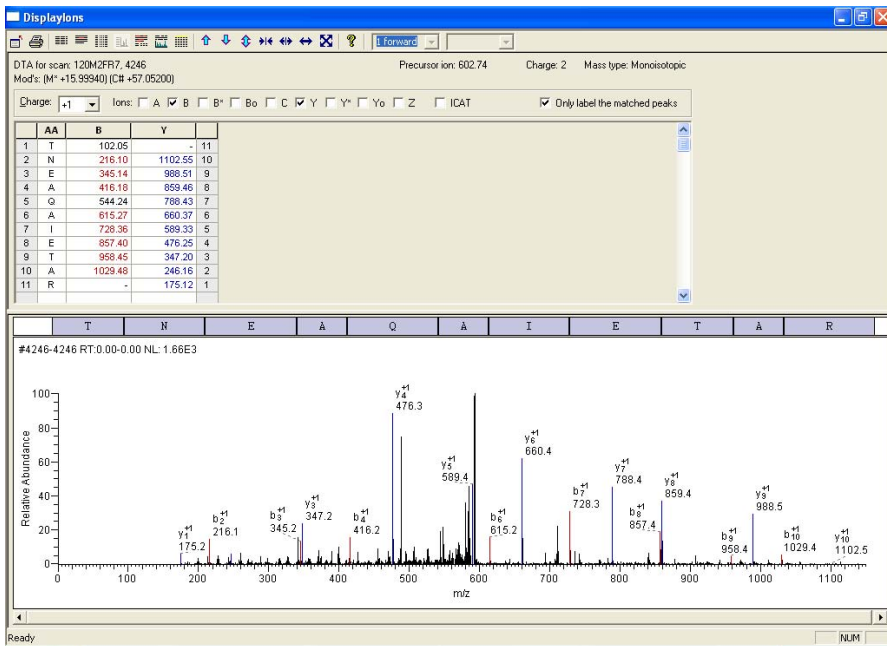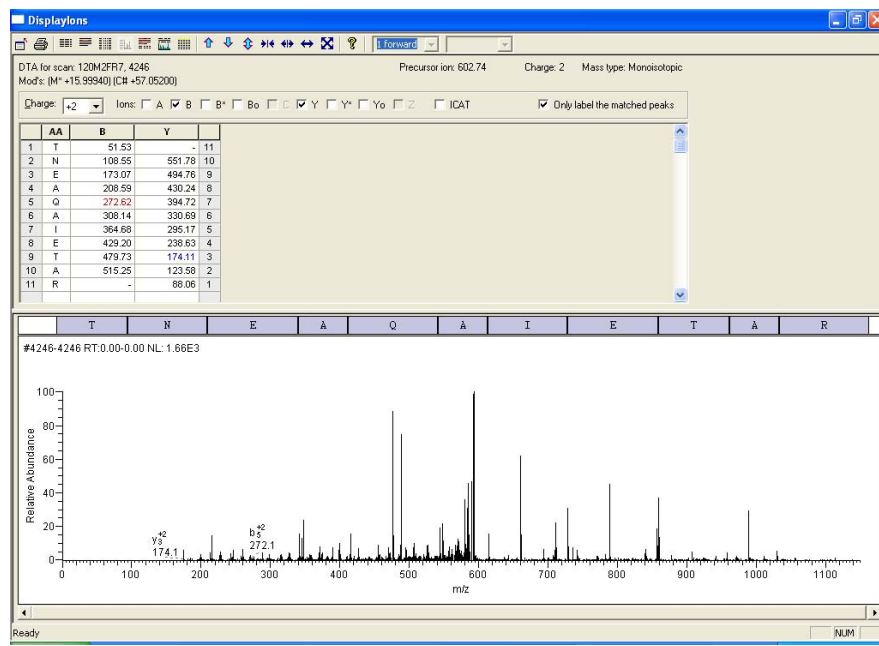



# KTPAGLQVLNDYLADKS IPI00320208.2

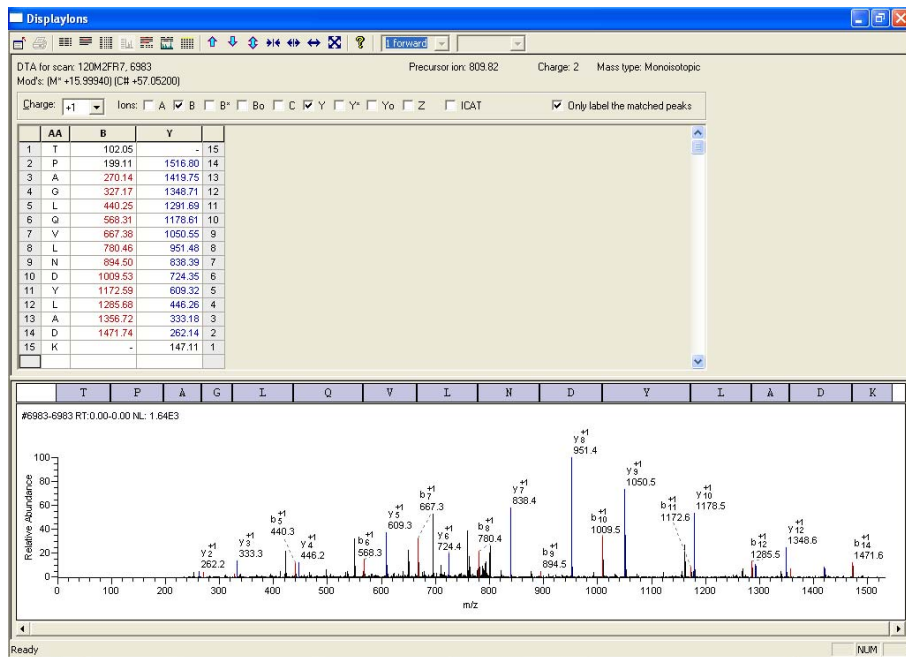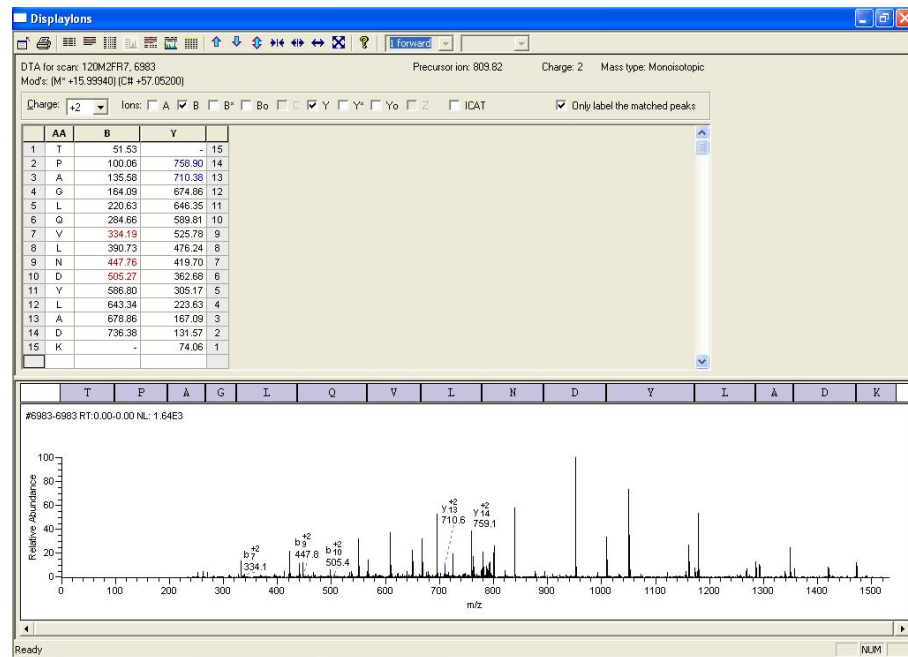

# KTPSSDVLVFDYTKH

## IPI00122696.4, IPI00122698.1

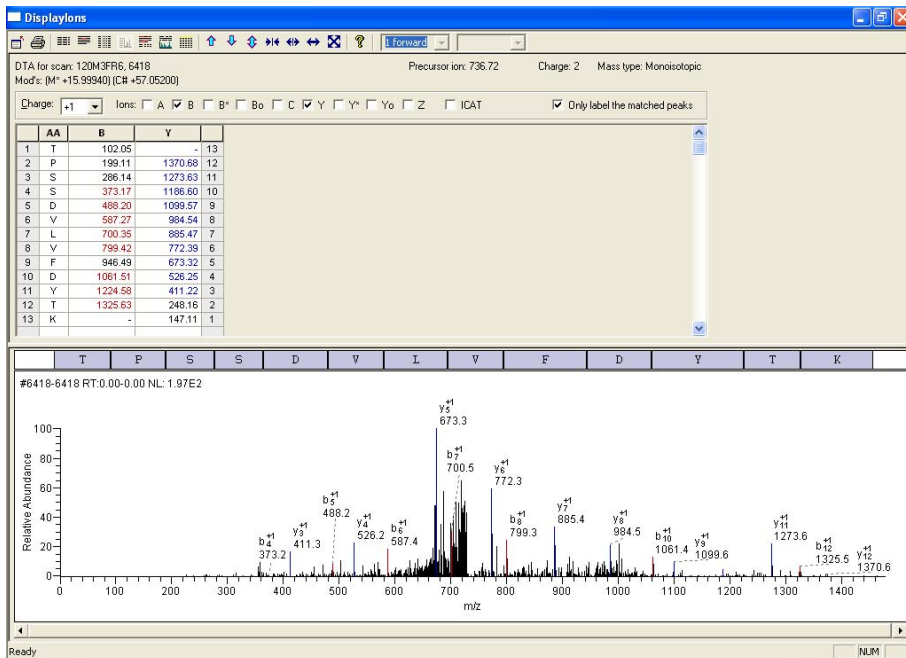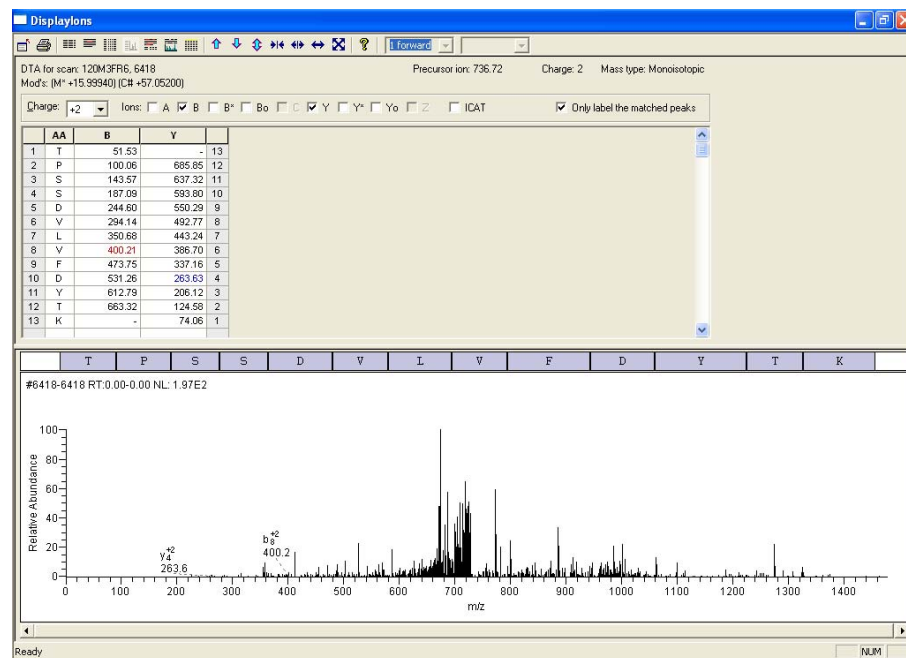

# KTSFFQALGITTKI

IPI00314950.2, IPI00605765.3, IPI00626366.3, IPI00676519.1

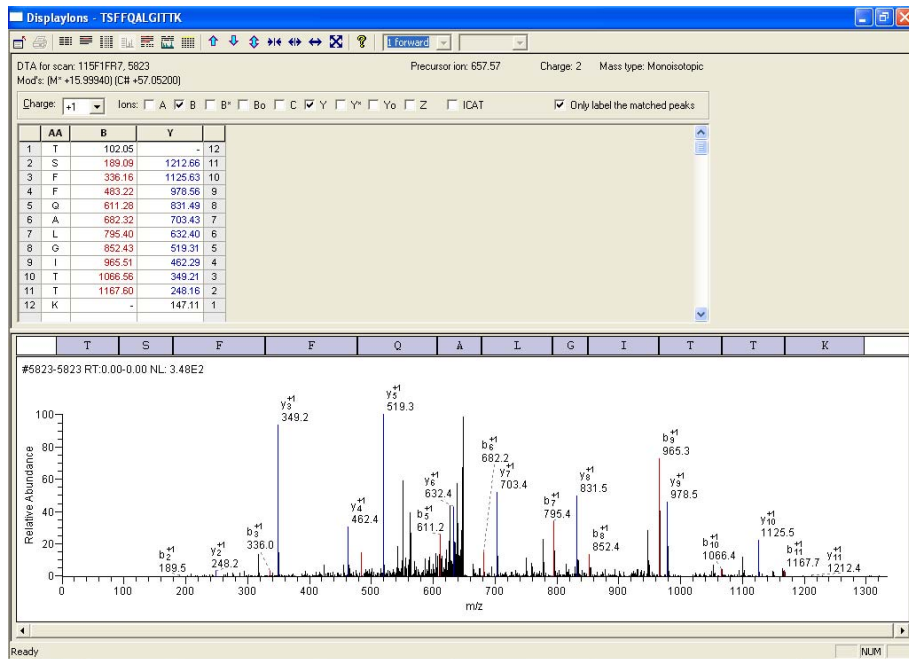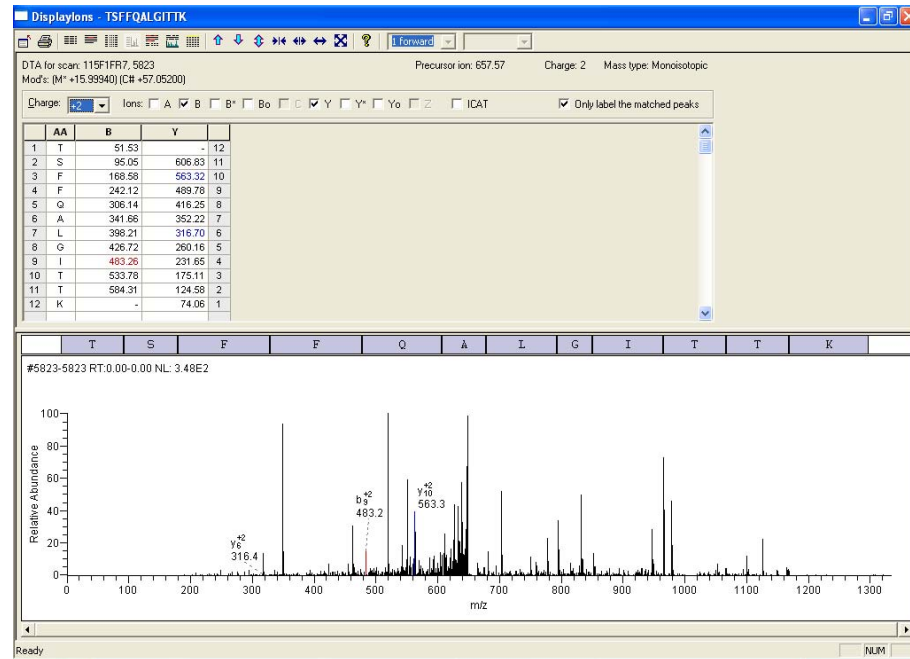

# KTVDNFVALATGEKG

## IPI00135686.2, IPI00460855.1

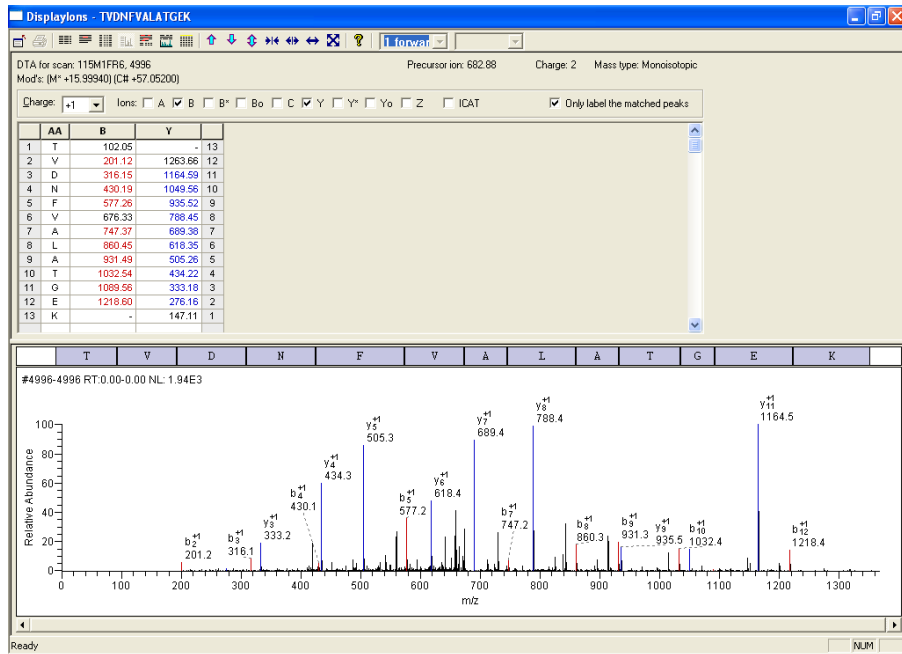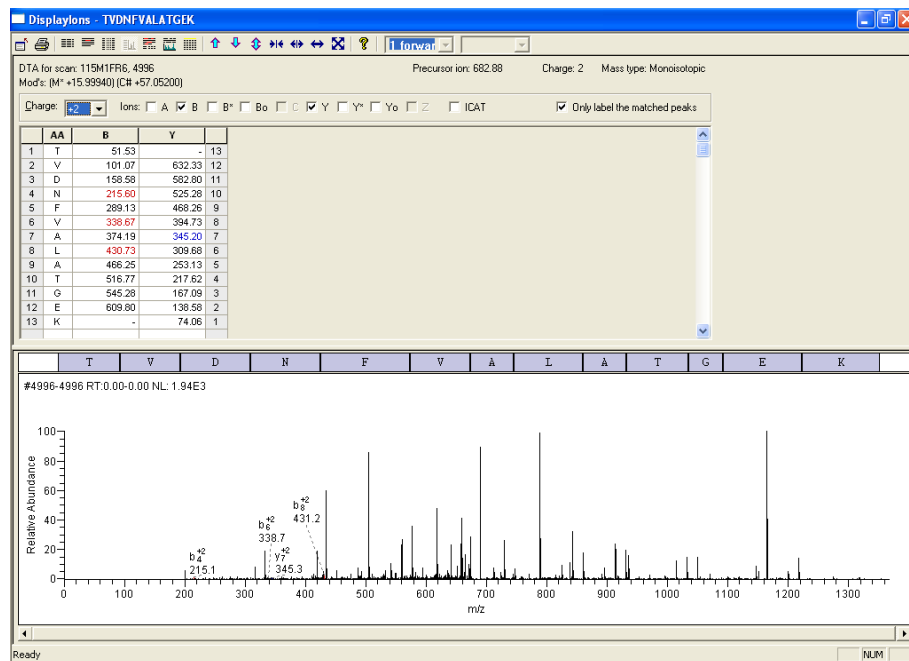

# KTVEAAHGTVTRH

## IPI00135231.2, IPI00762452.1

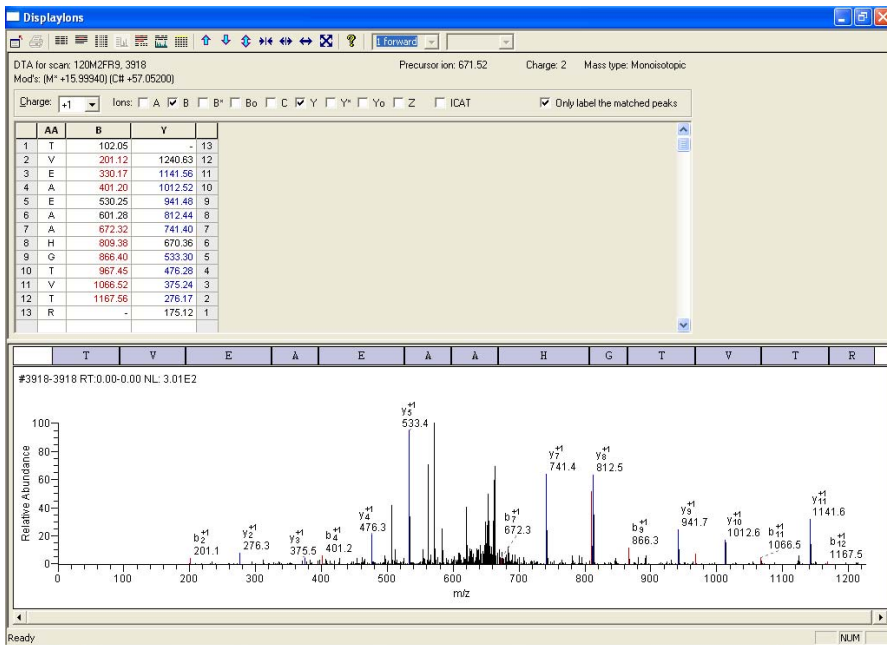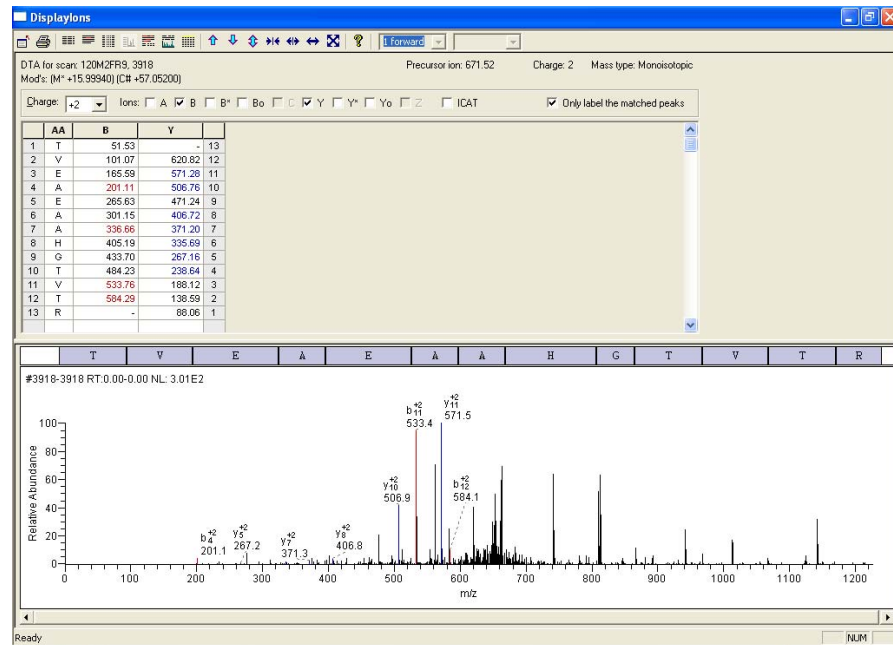

# KVAEIEHAEKEKM

## IPI00320217.8, IPI00653274.1

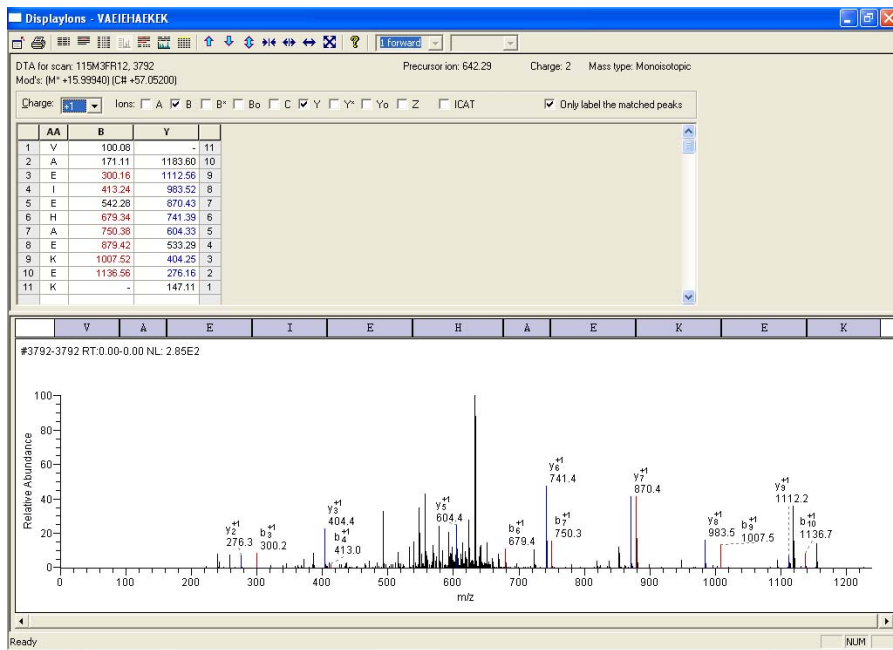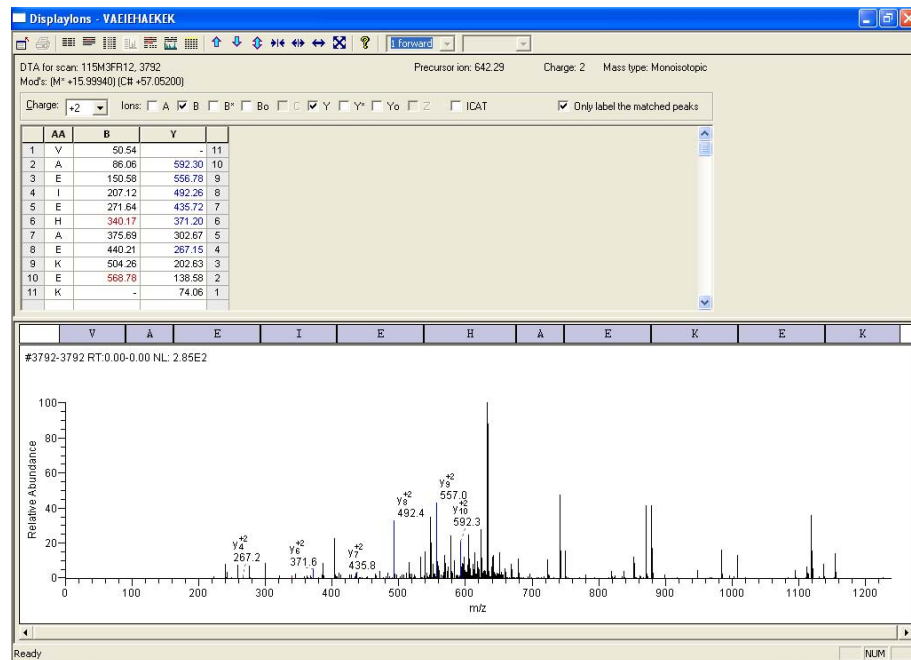

# KVAGQDGSVVQFKI

IPI00108762.3, IPI00122955.1, IPI00129580.1, IPI00165706.1, IPI00379383.3,  
IPI00620190.2, IPI00652964.1, IPI00751963.1, IPI00761765.1

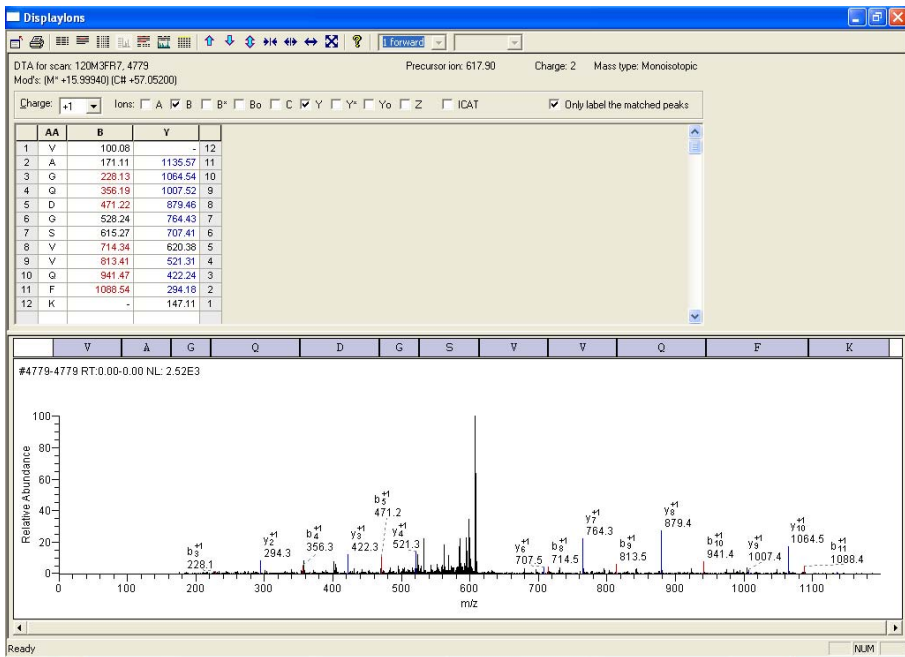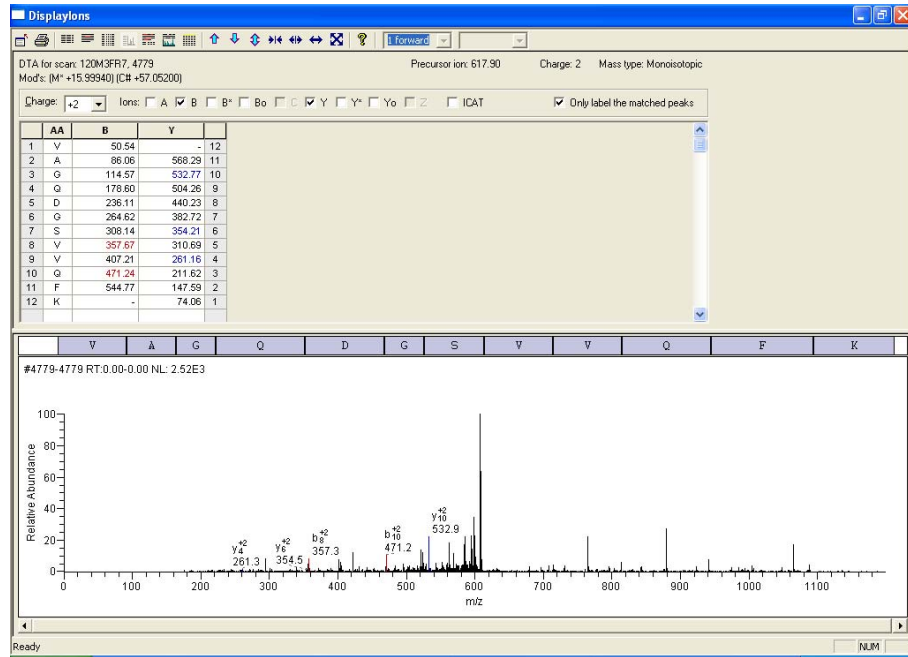

# KVANVSLALYKG

IPI00131357.7, IPI00343077.5, IPI00605025.2, IPI00750216.2, IPI00761494.1,  
IPI00762201.1

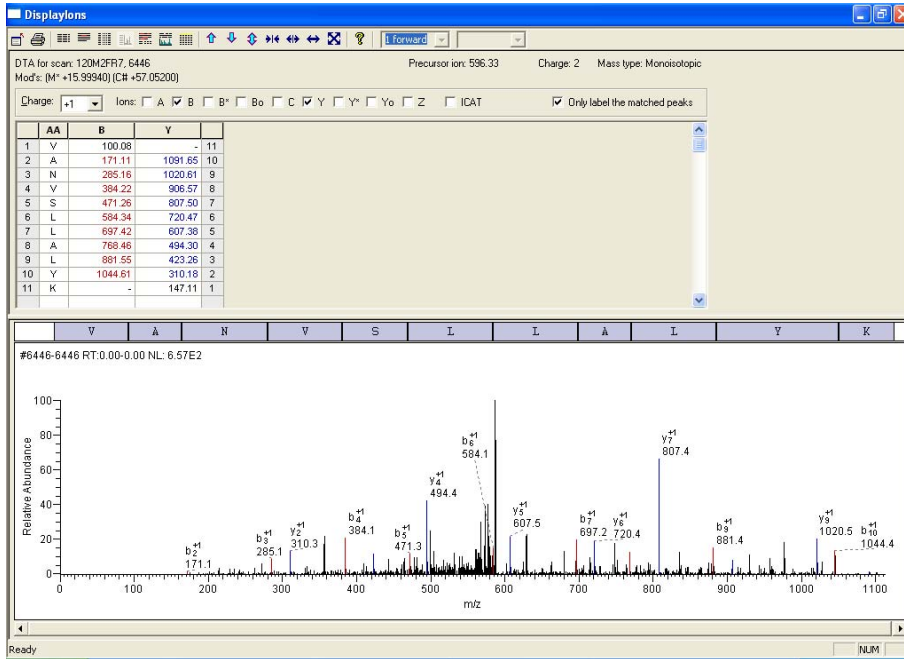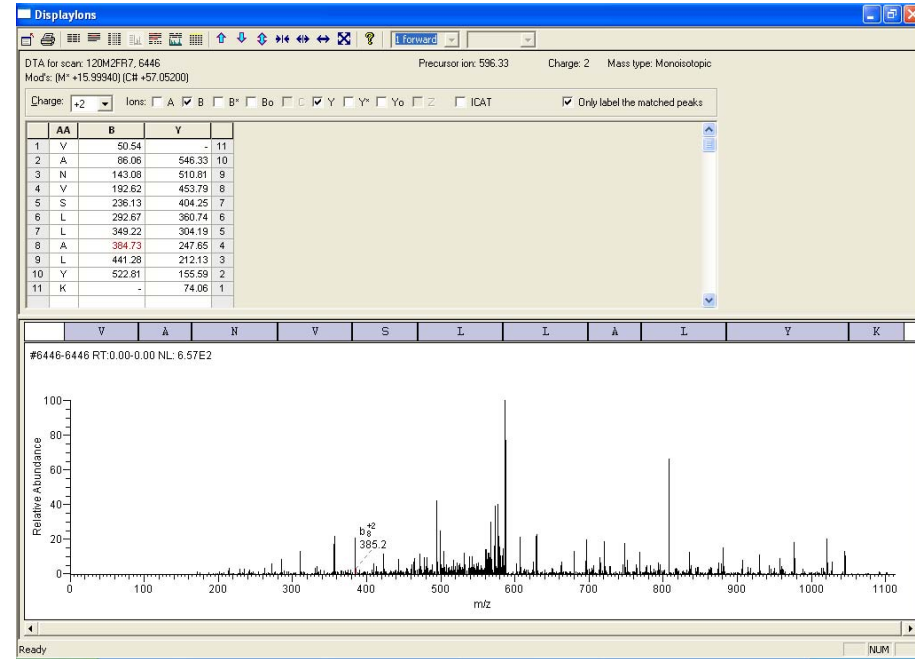



# KVAQGVSGAVQDKG

IPI00323971.2, IPI00624746.2, IPI00761563.1

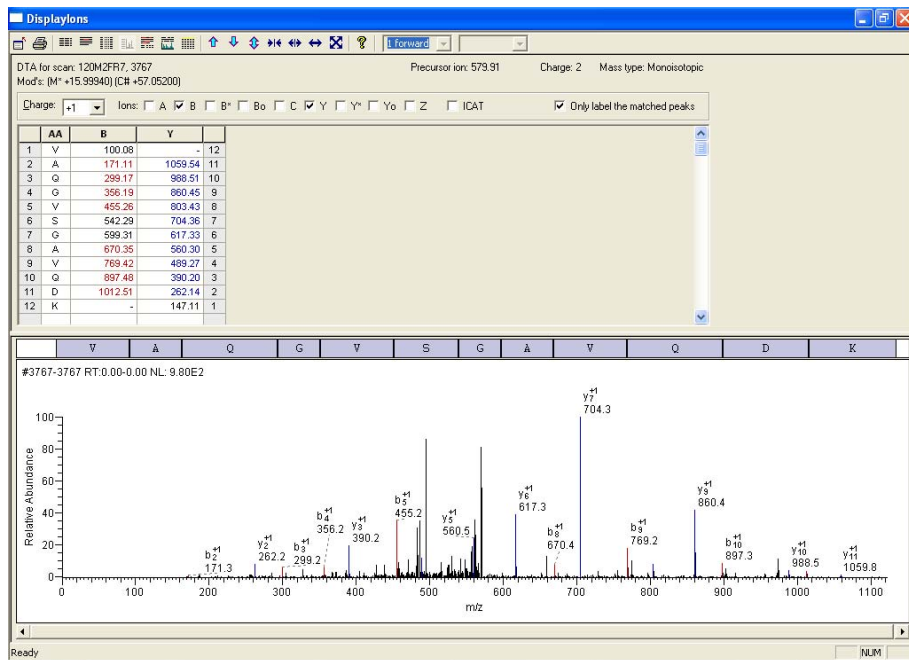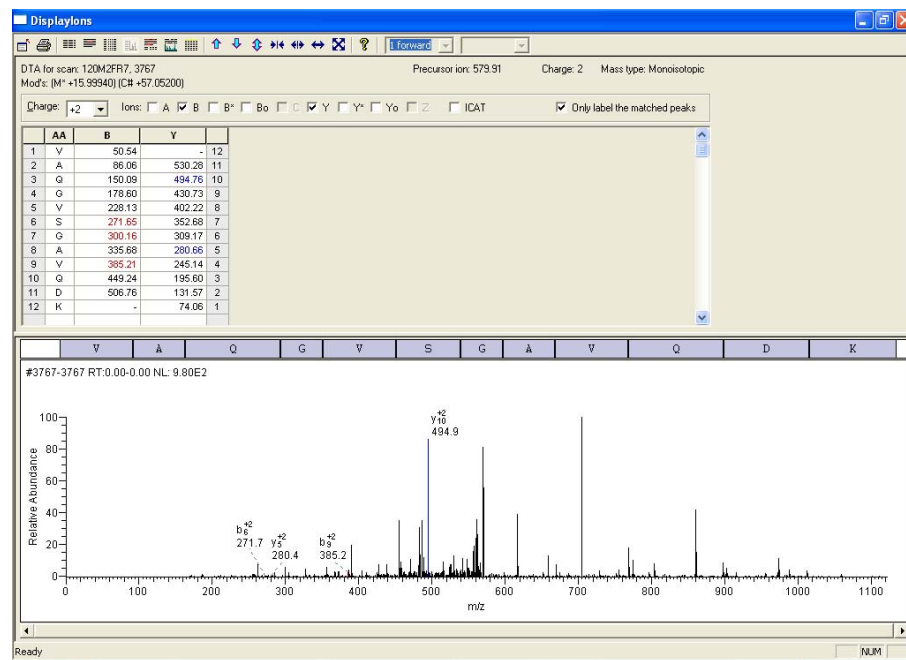

# KVDNDENEHQLSLRT

IPI00127415.1, IPI00130905.5, IPI00468717.6, IPI00515155.1, IPI00648014.1,  
IPI00649841.1

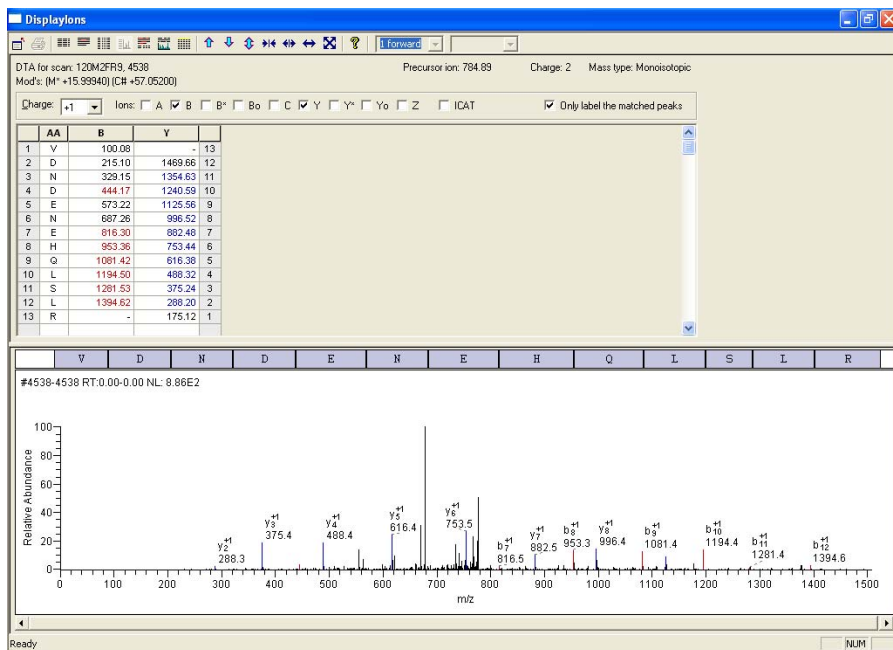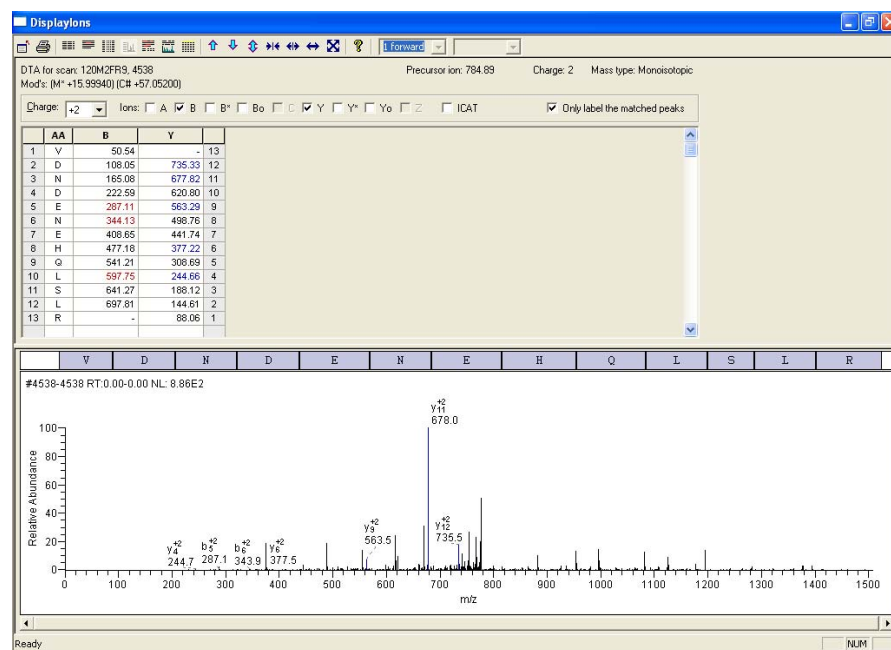

# KVDNSSLTGESEPQTRS

IPI00122048.2, IPI00230680.7, IPI00311682.5, IPI00420569.2, IPI00752412.1,  
IPI00762871.1

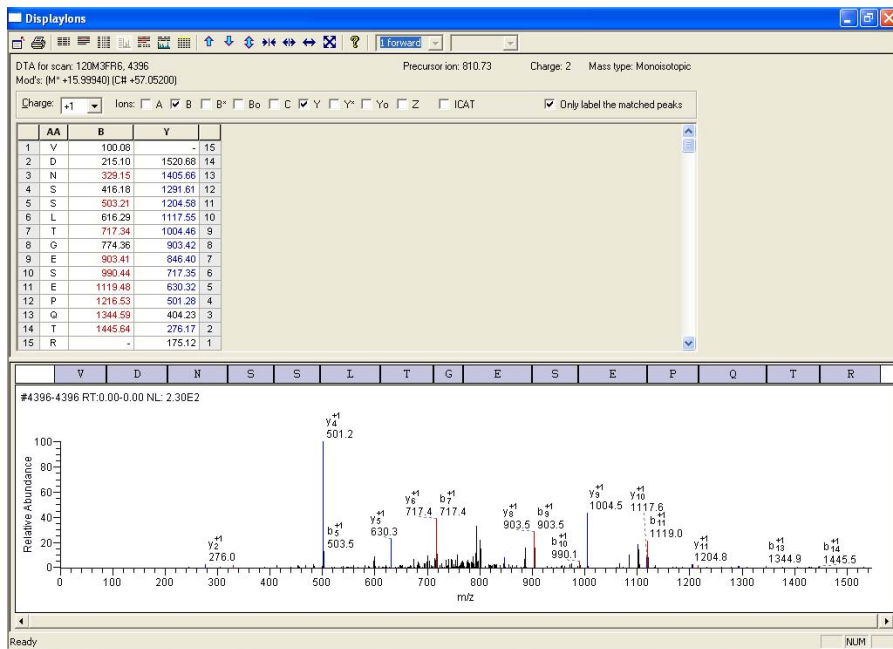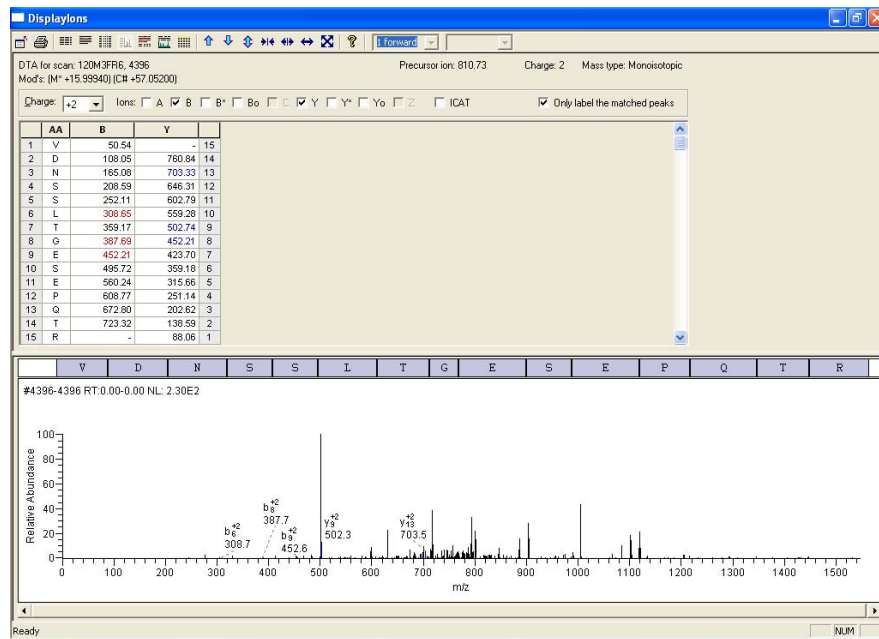

# KVEGSDITGIEEIVIPKK IPI00338458.2

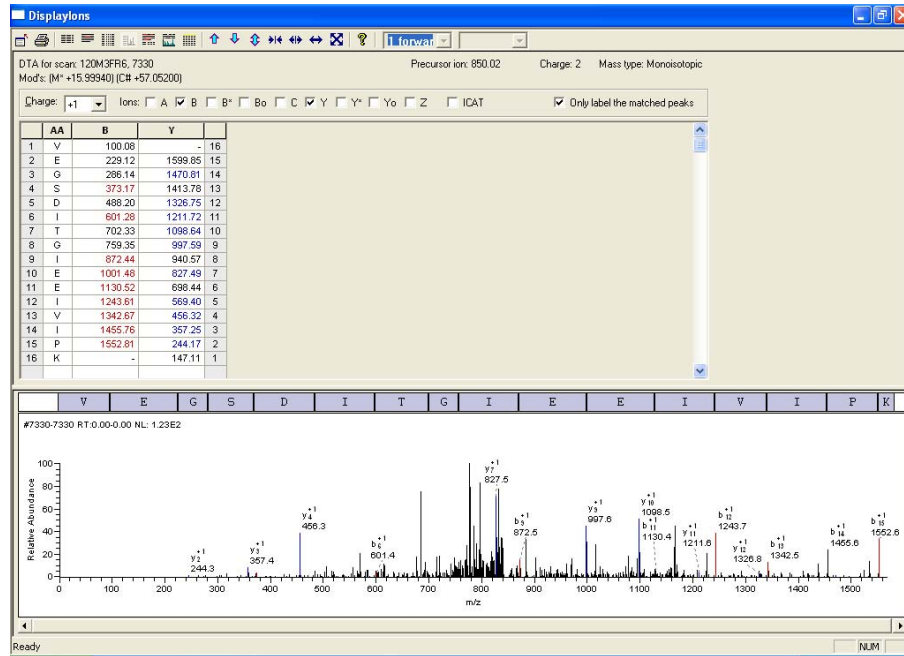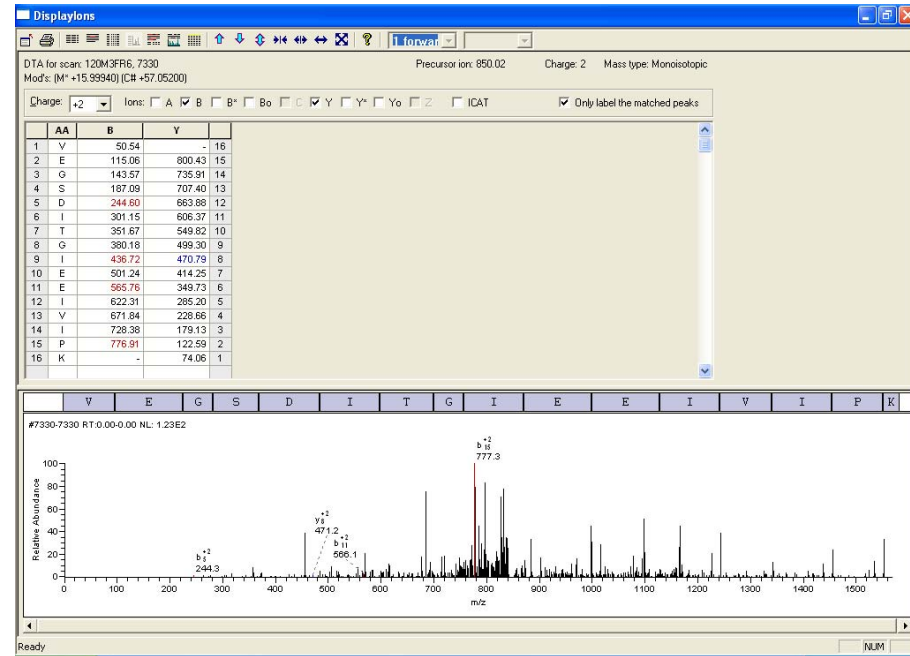

# KVEIANDQGNRT

IPI00123794.5, IPI00133208.3, IPI00323357.3, IPI00331546.2, IPI00346073.1,  
 IPI00387494.1, IPI00480560.1, IPI00554922.1, IPI00663940.1, IPI00719999.1,  
 IPI00750084.1, IPI00753407.1, IPI00761946.1

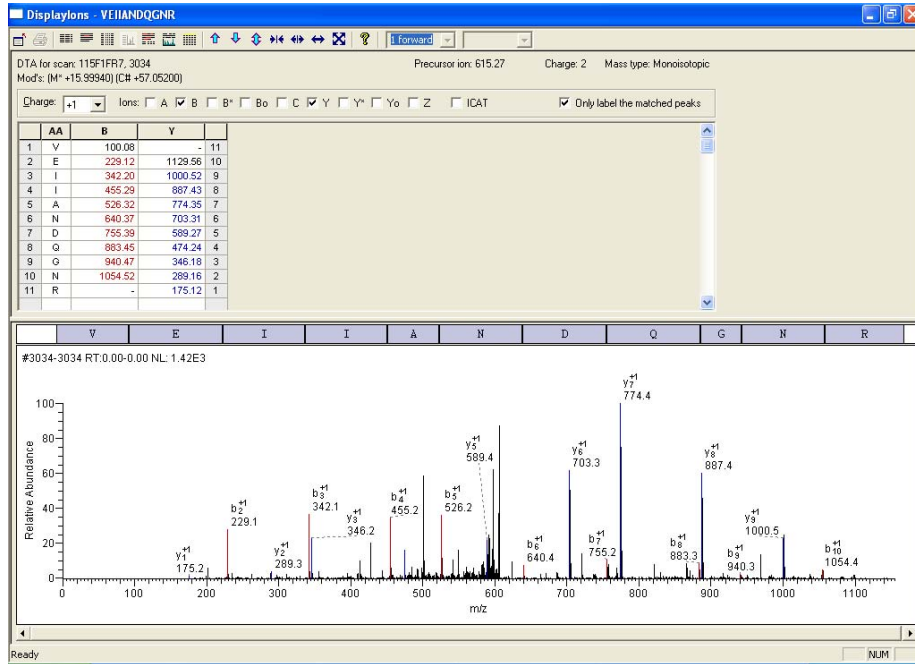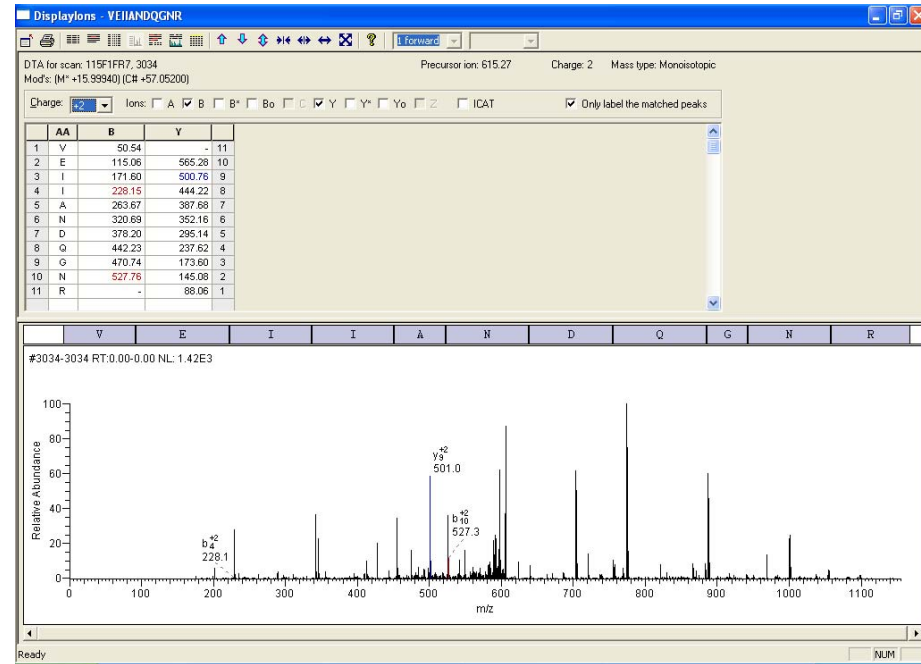

# KVELVPPTPAEIPTAIQSVKK

## IPI00133342.1, IPI00762803.1

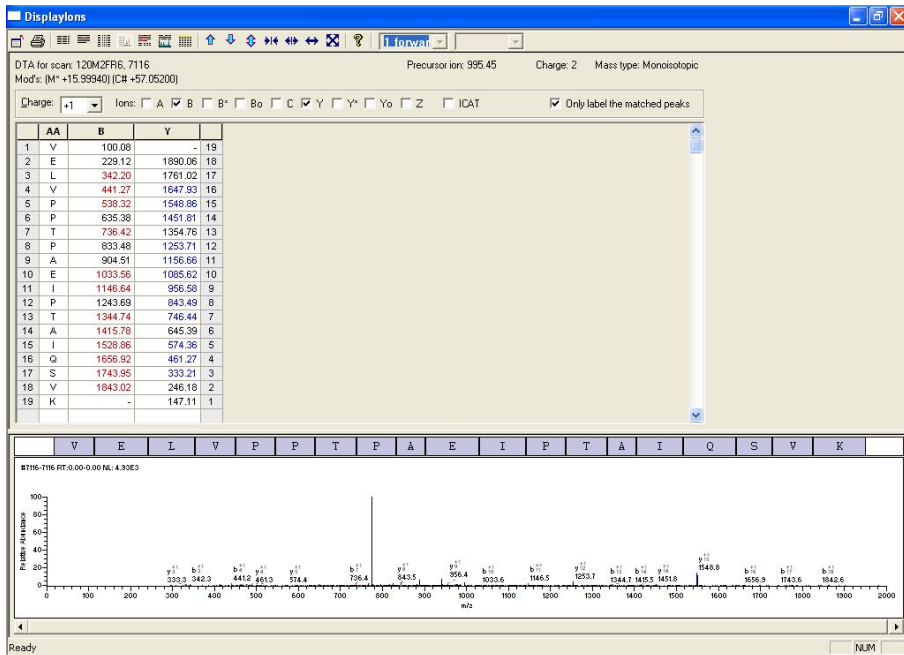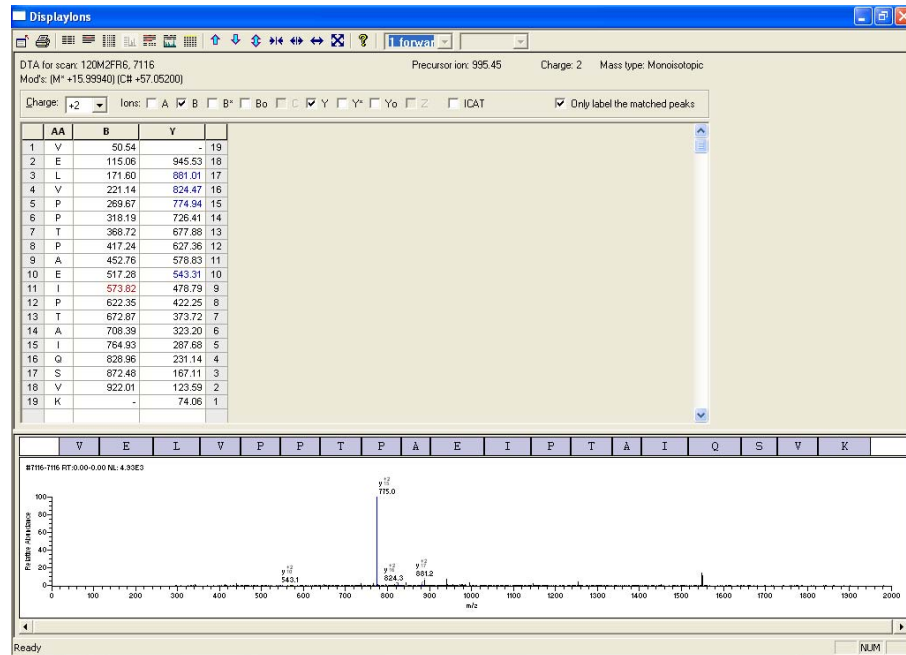

# KVFSDEVQQQAQLSTIRS IPI00463573.3

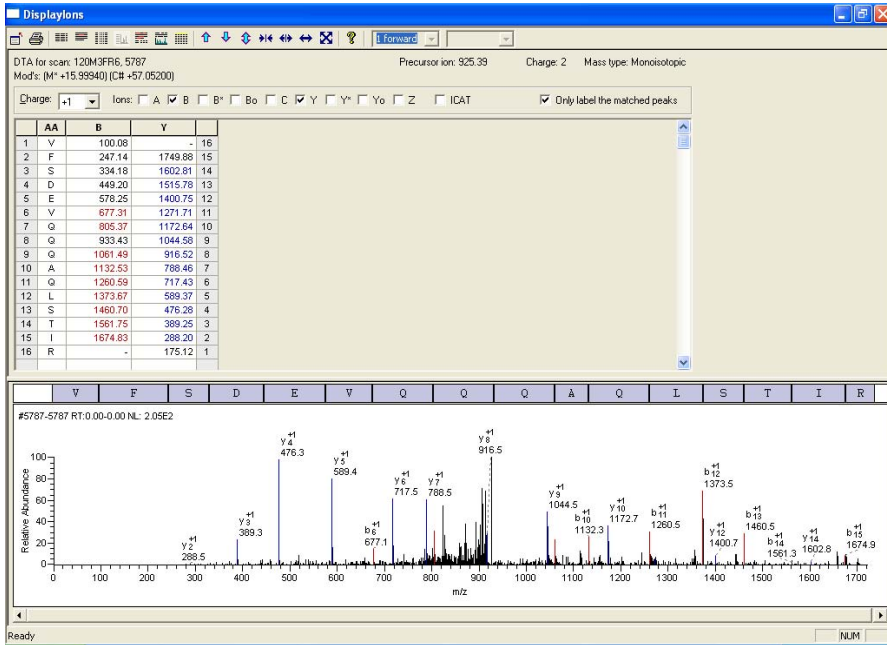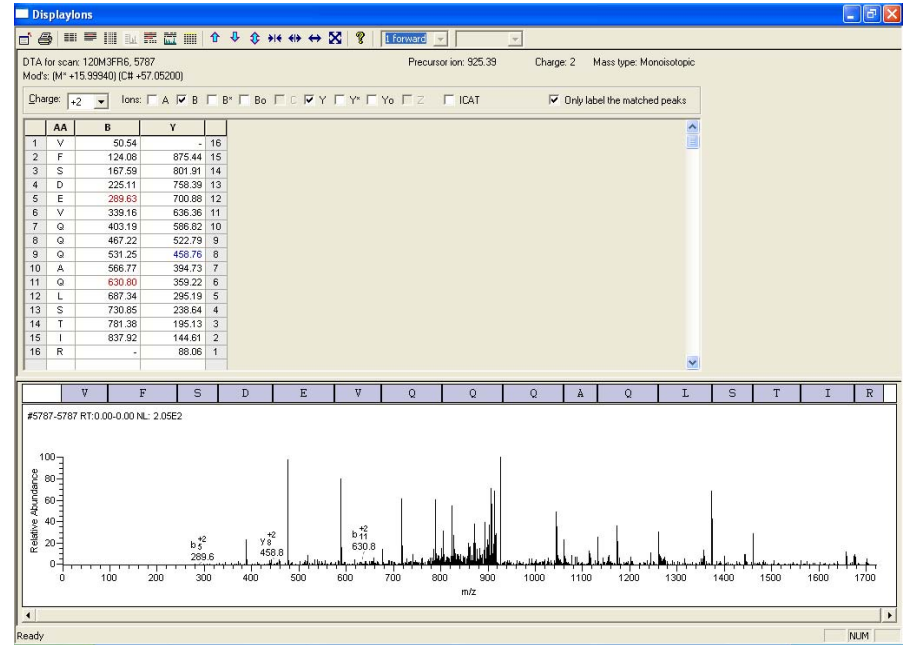

# KVGINYQPPTVVPGGDLAKV

IPI00110753.1, IPI00117348.4, IPI00117350.1, IPI00129028.1, IPI00311175.5,  
 IPI00403810.2, IPI00466390.1, IPI00473667.1, IPI00604879.1, IPI00621551.2,  
 IPI00652705.1, IPI00652850.1, IPI00653099.1, IPI00665335.1, IPI00755835.1

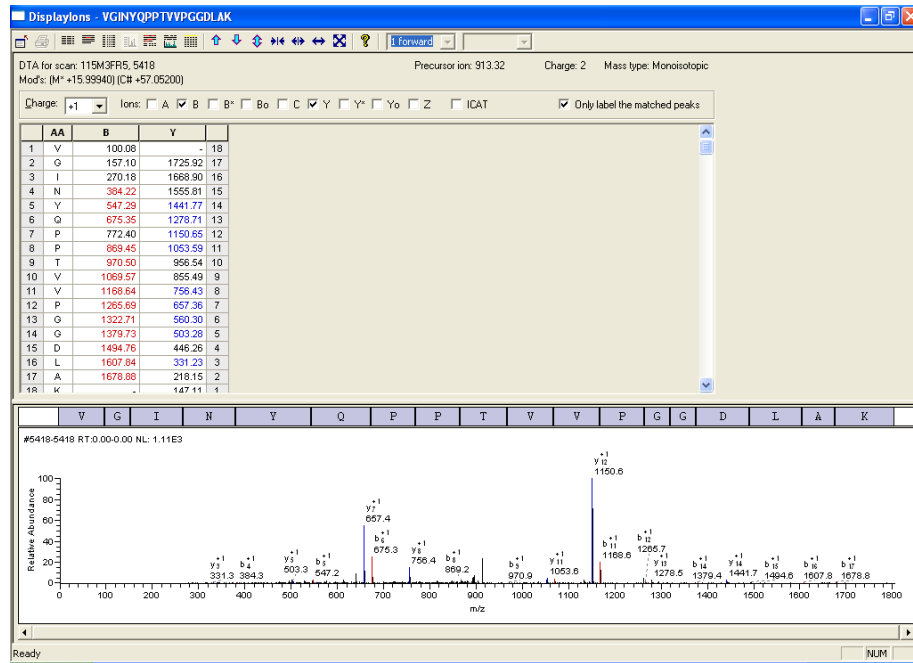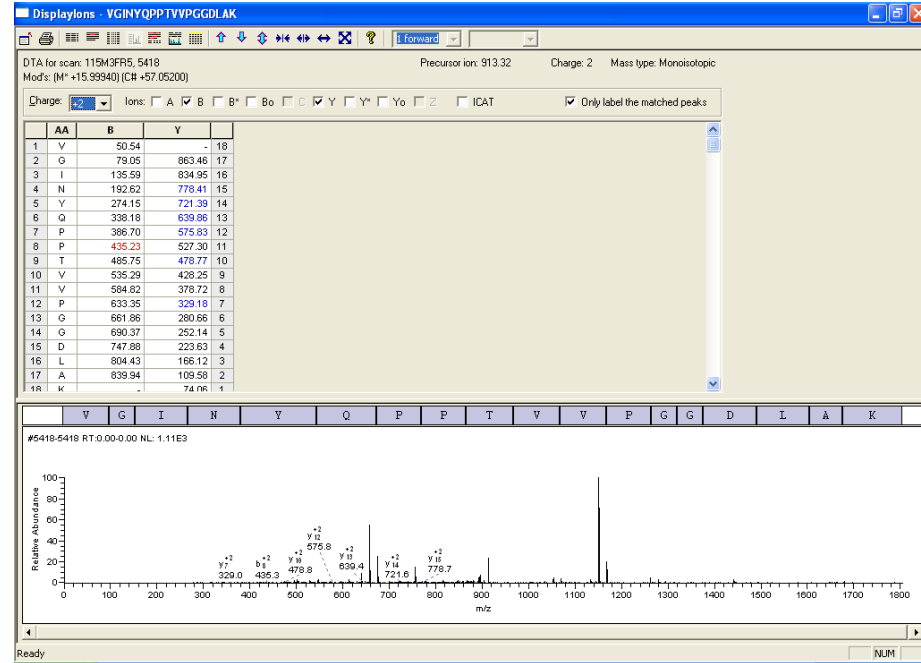



# KVLELIQSGVAEGAKL IPI00122212.2

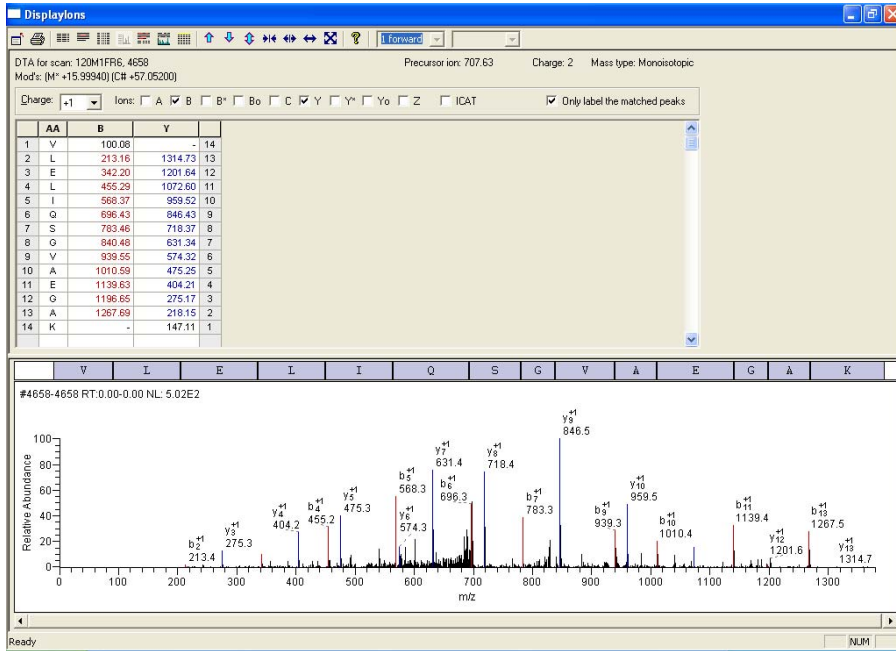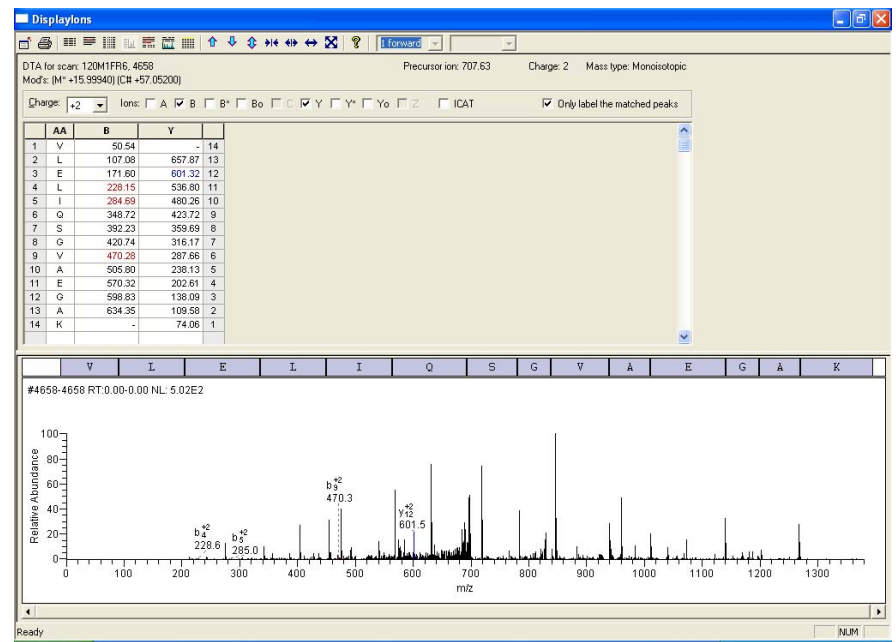

# KVLEQLTGQTPVFSKA

IPI00331461.3, IPI00340036.2, IPI00474856.1, IPI00624735.4, IPI00626239.2

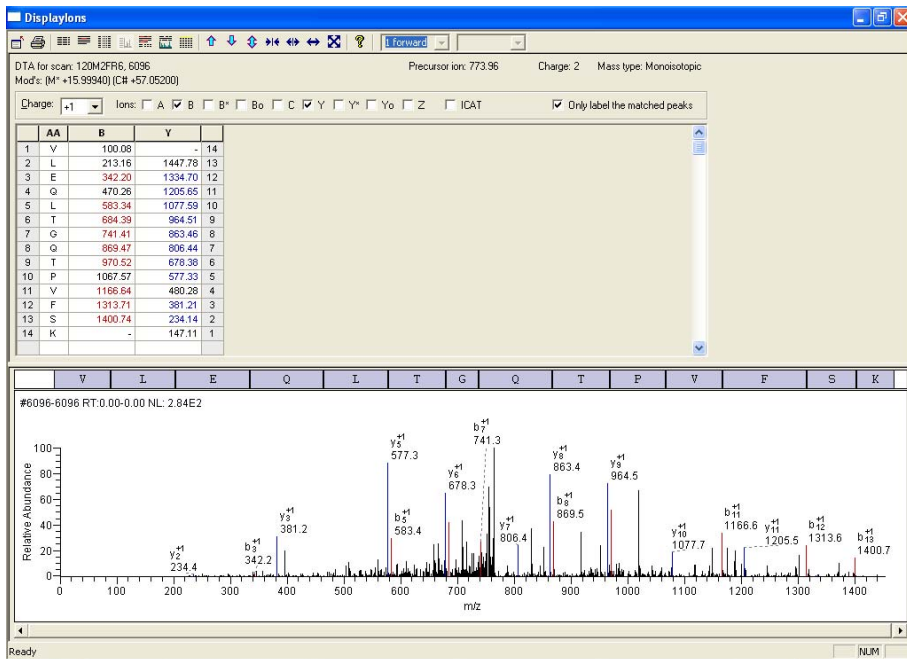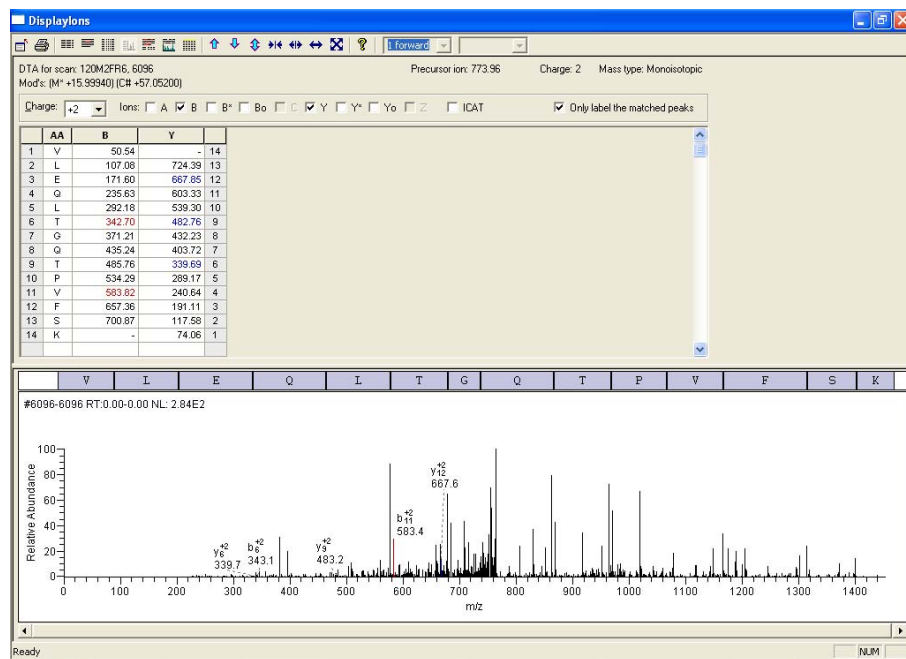

# KVLETAEDIQERR

## IPI00651953.3, IPI00671503.1, IPI00750020.1

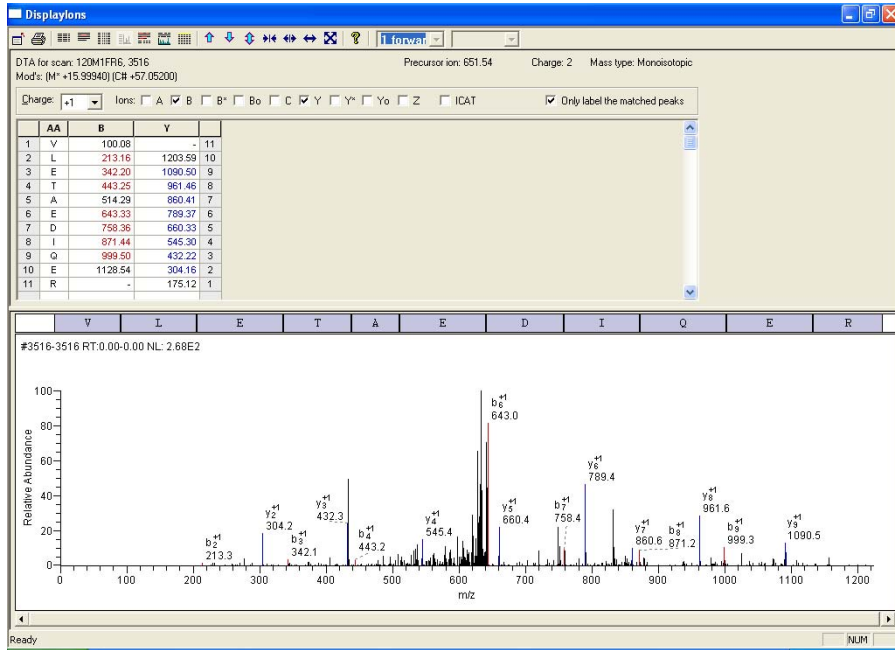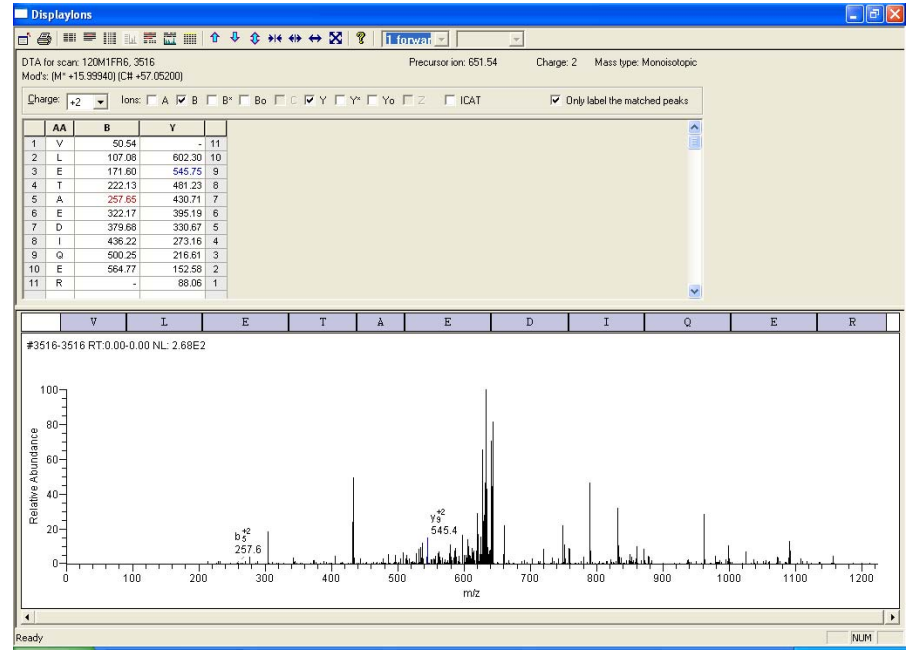

# KVLPLIGSQEQKSQGSHKT IPI00130390.5

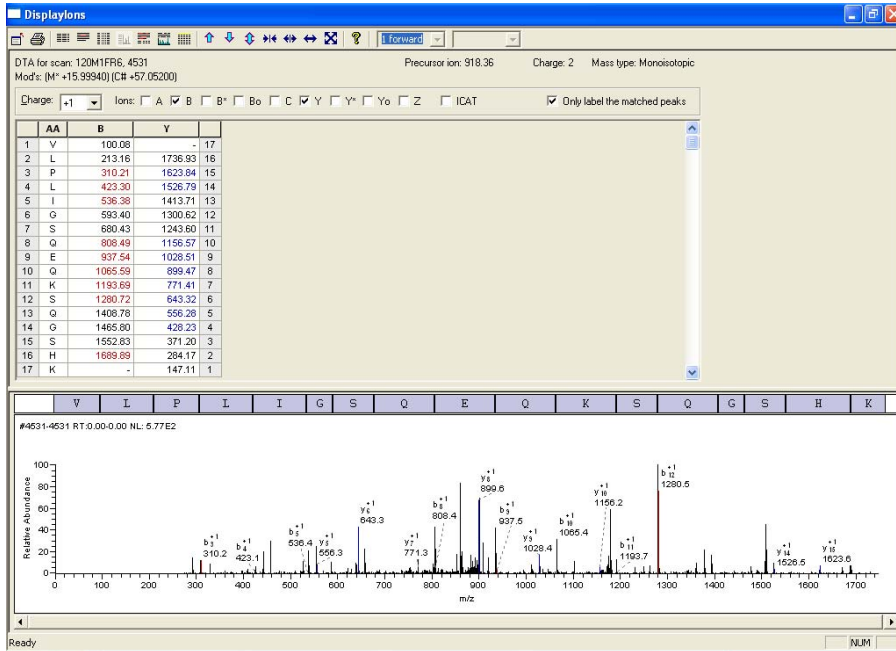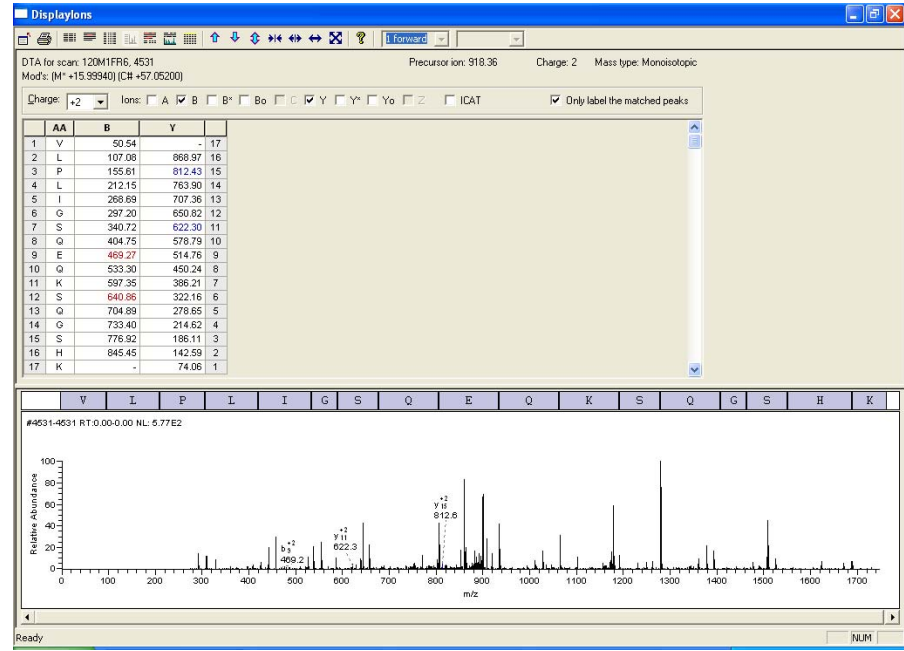

# KVNADEVGGEALGRL

## IPI00126208.1, IPI00762198.1

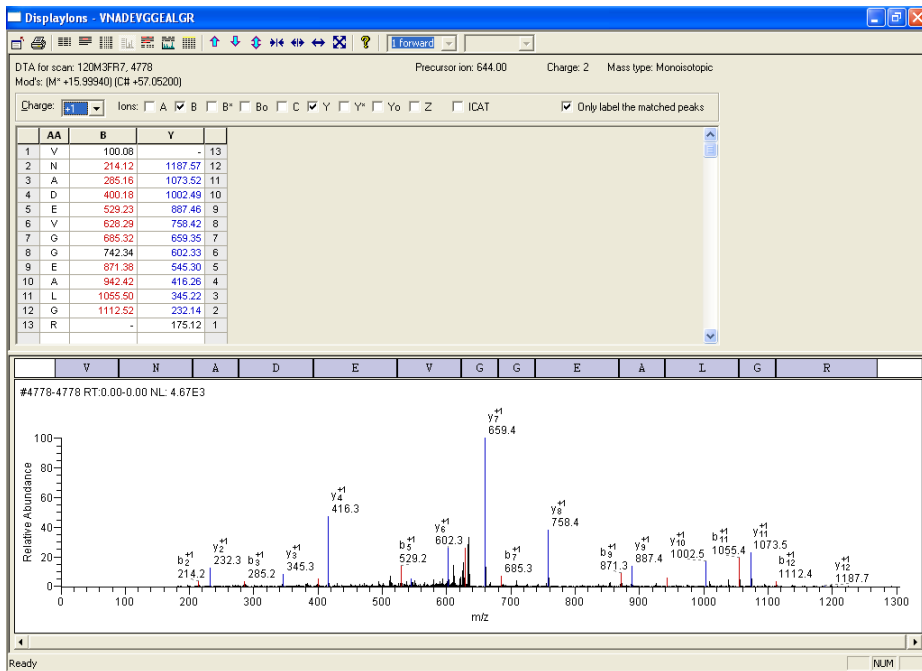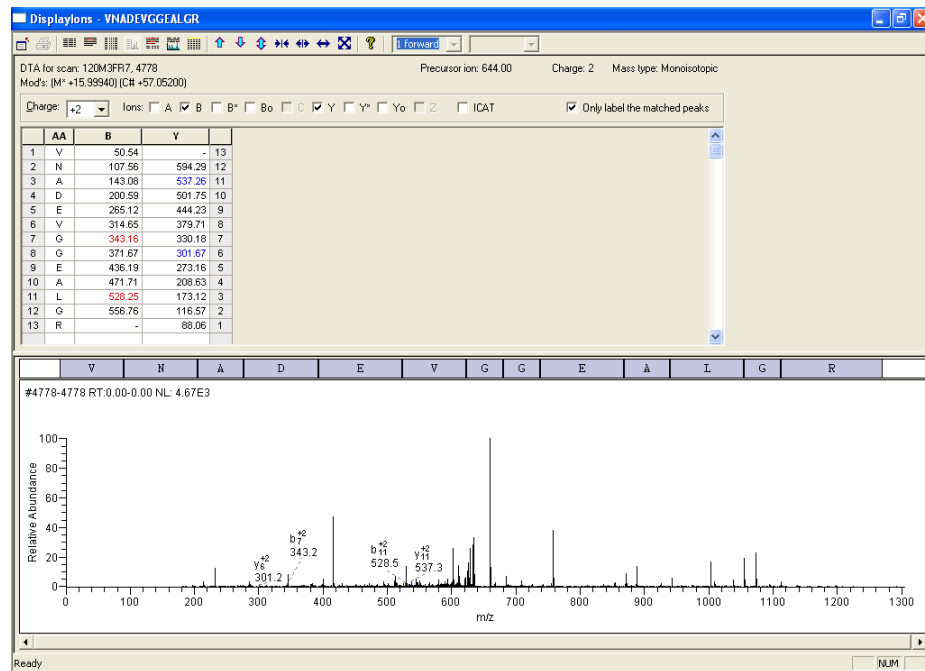

# KVNTAAFLTPLELKA IPI00268688.3

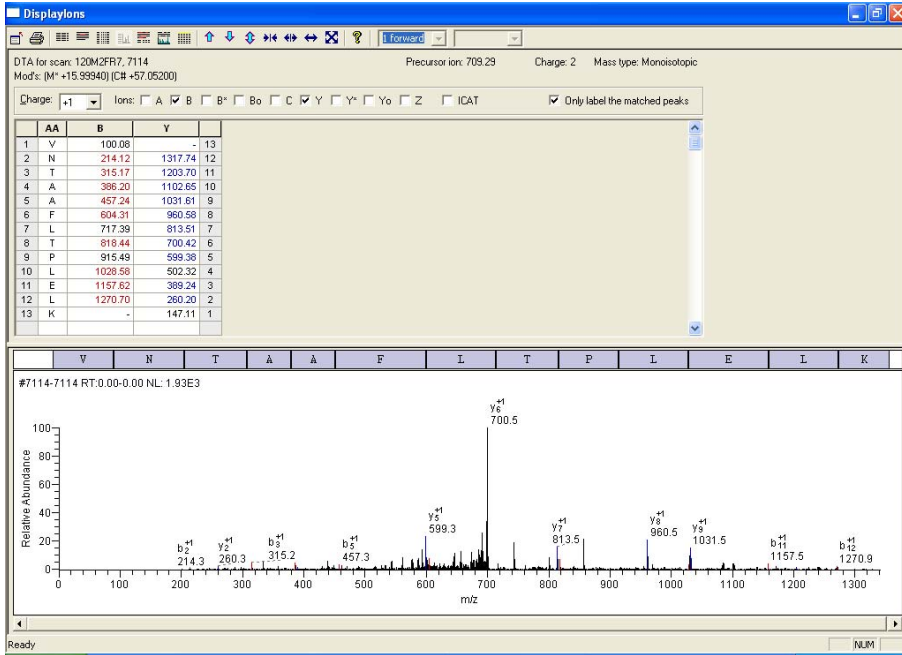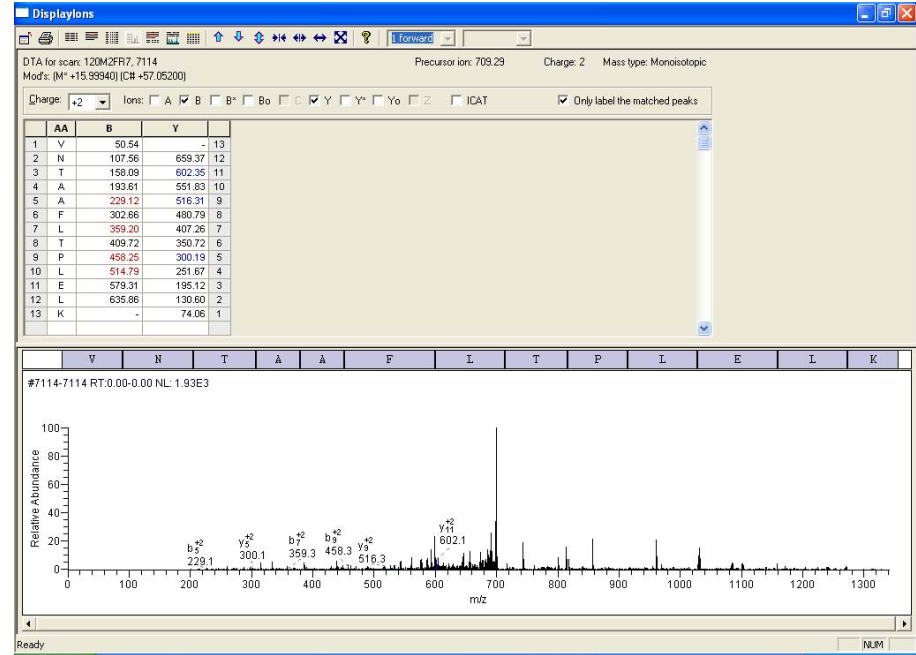

# KVPAINVNDSVTKS

## IPI00230440.5, IPI00605533.1, IPI00758028.1

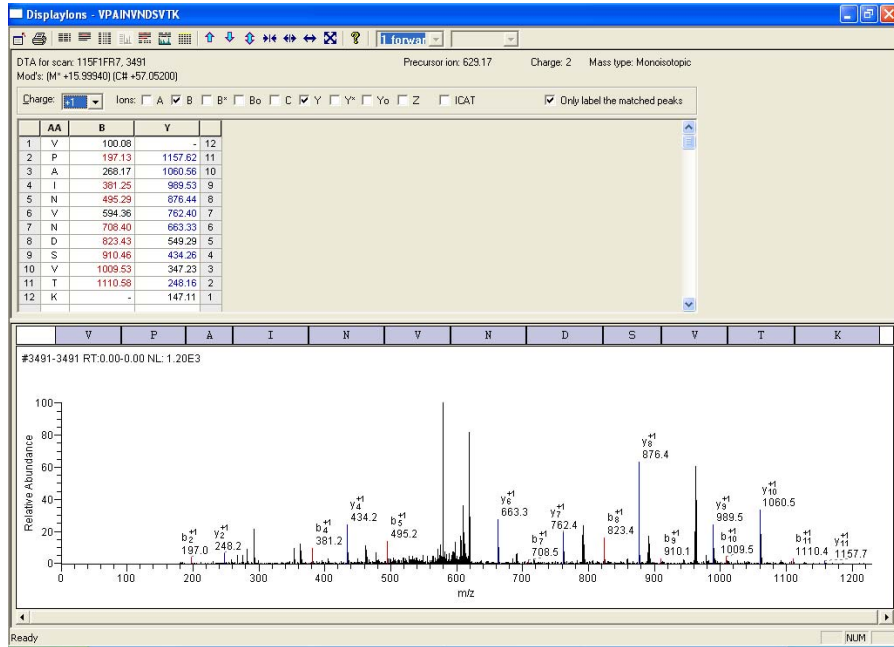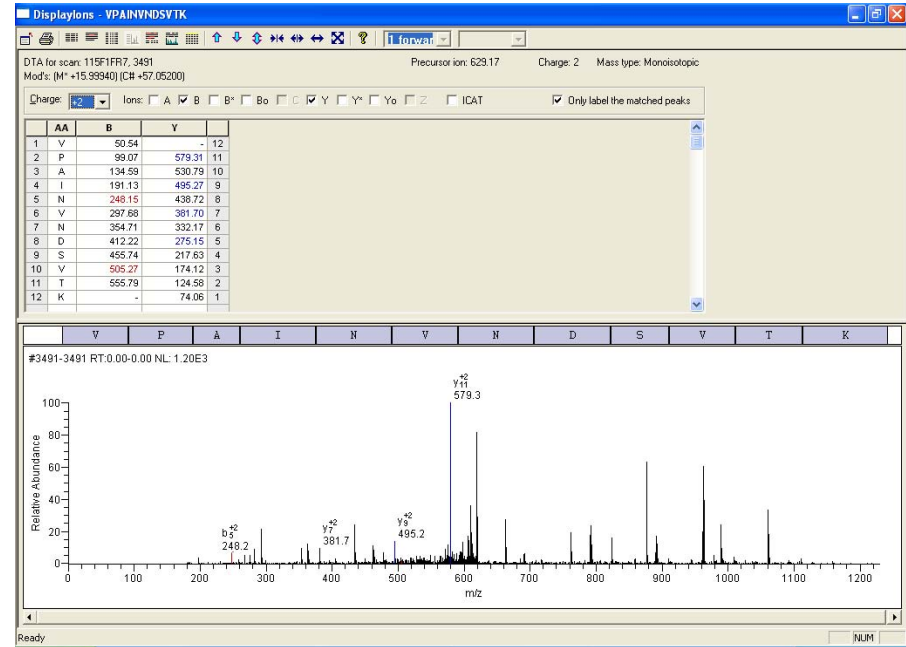

# KVLLTGETSTDLKL IPI00420329.1

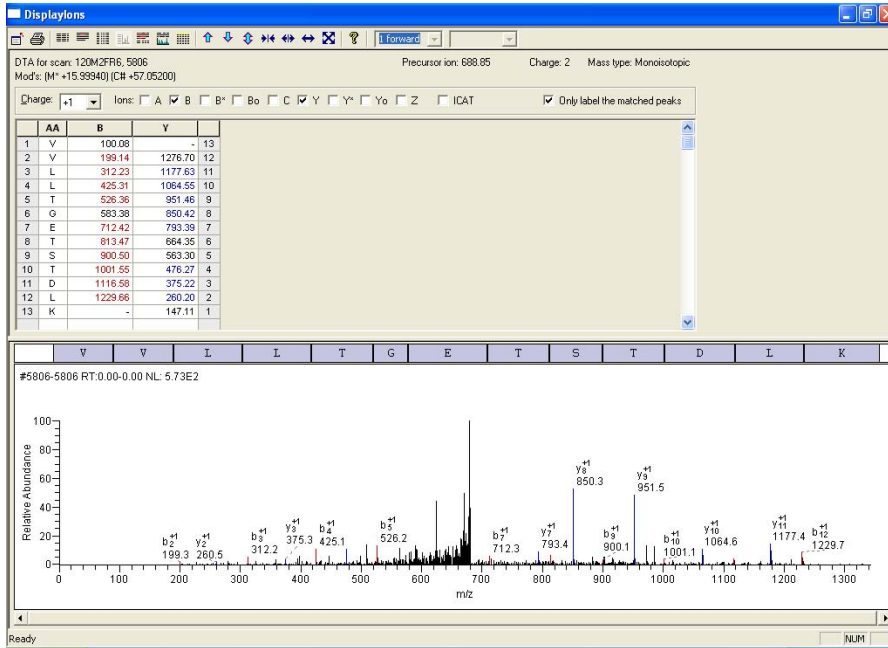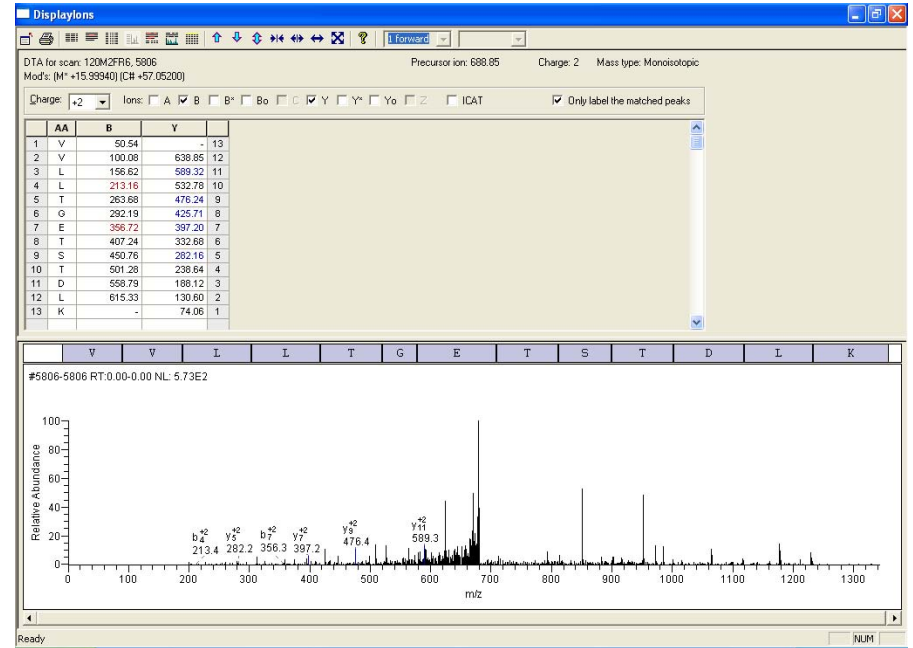



# KVVTDTDETELARQ IPI00474446.3

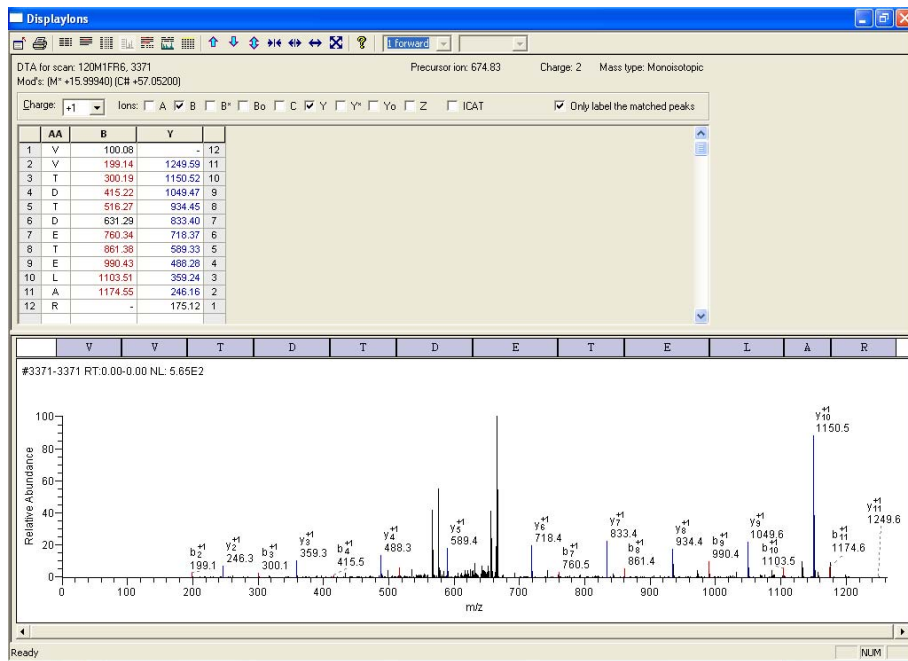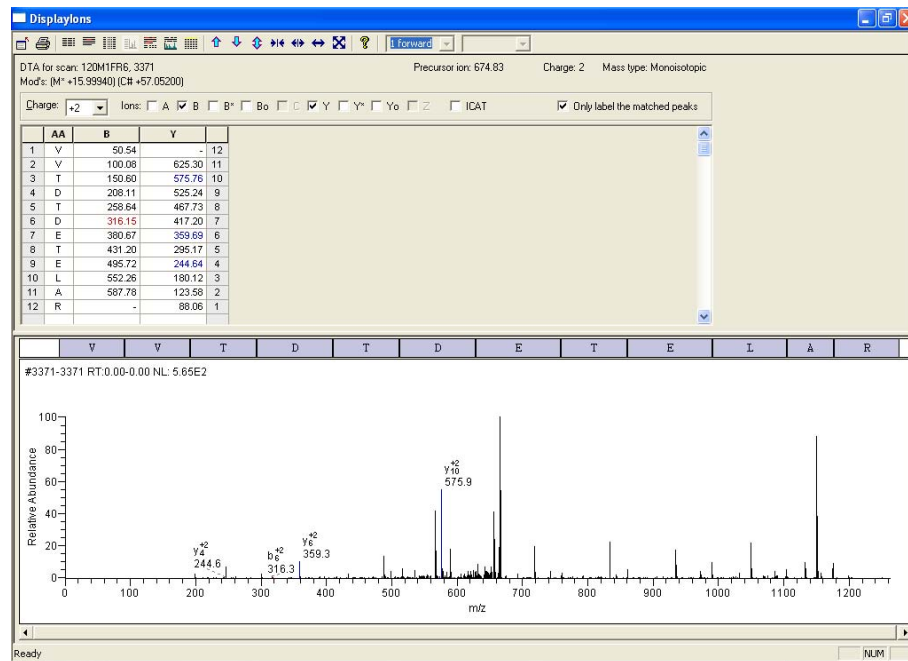

# KYNLSLLEICELSQEKM

## IPI00654165.2

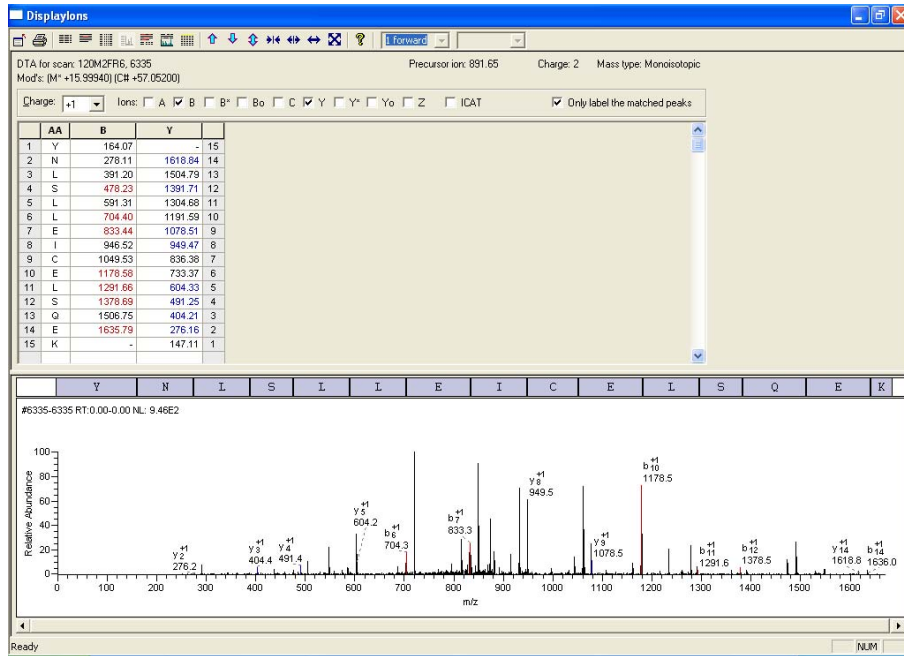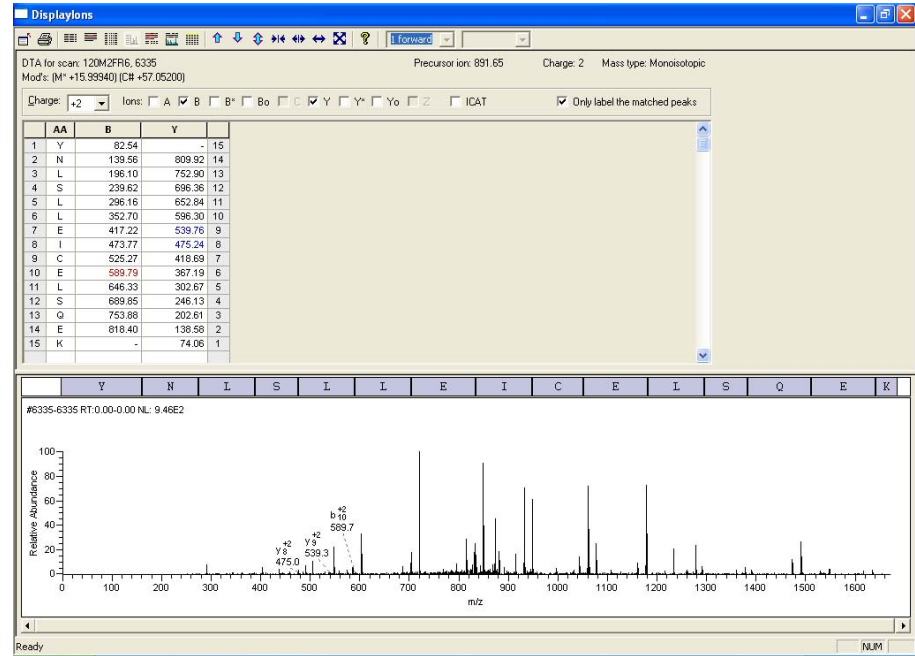

# KYQAVTATLEEKR

## IPI00223217.5, IPI00654400.1, IPI00662196.2

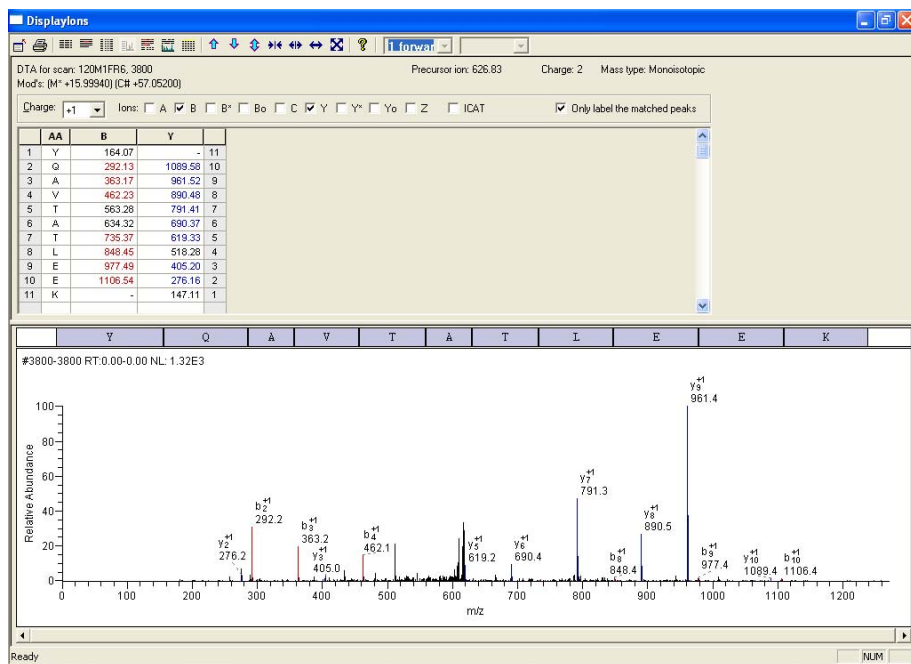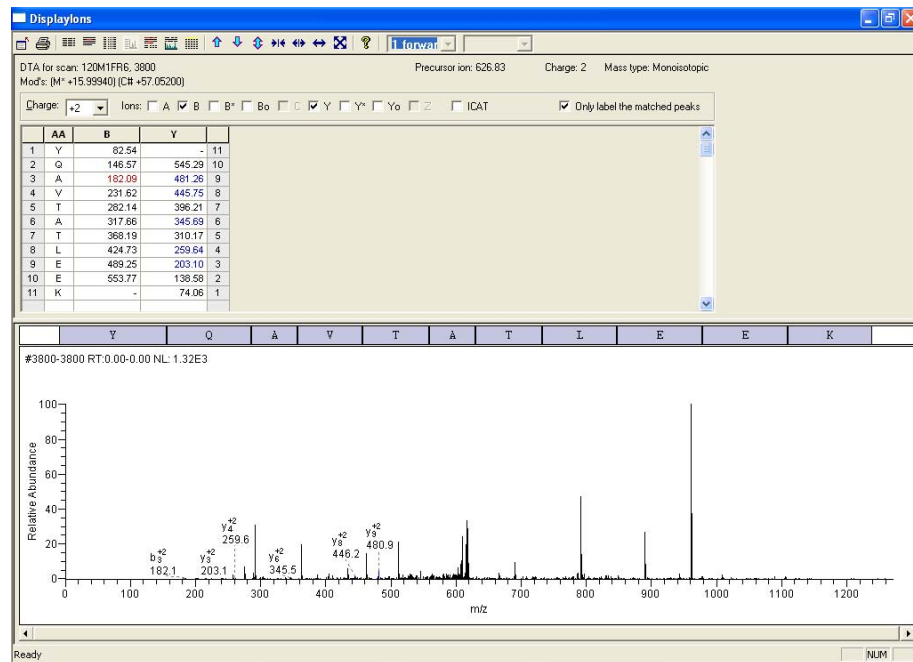

# KYSQVLANGLDNKL

IPI00268802.1, IPI00275455.2, IPI00317590.3, IPI00474174.1, IPI00620156.1

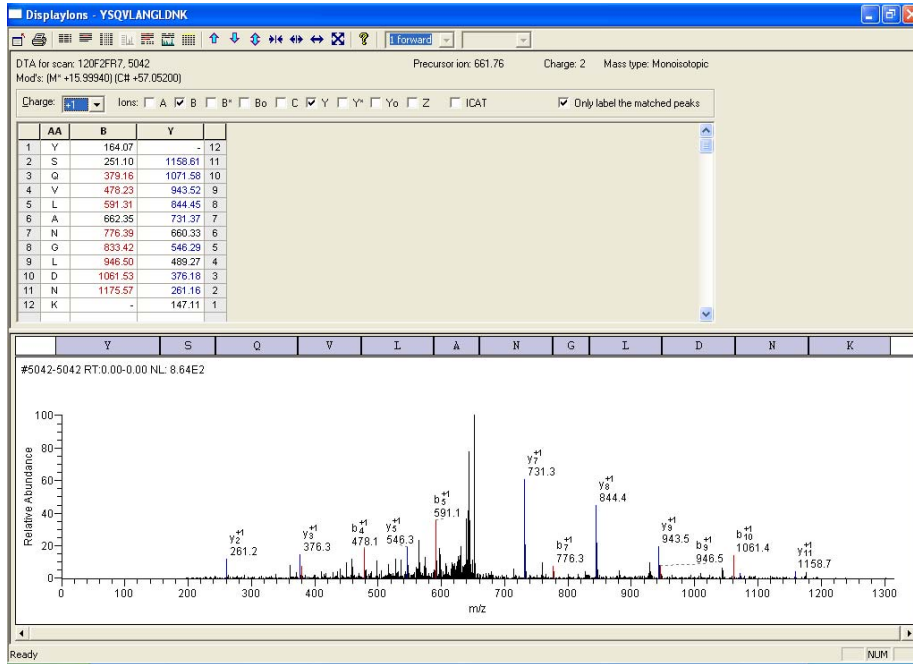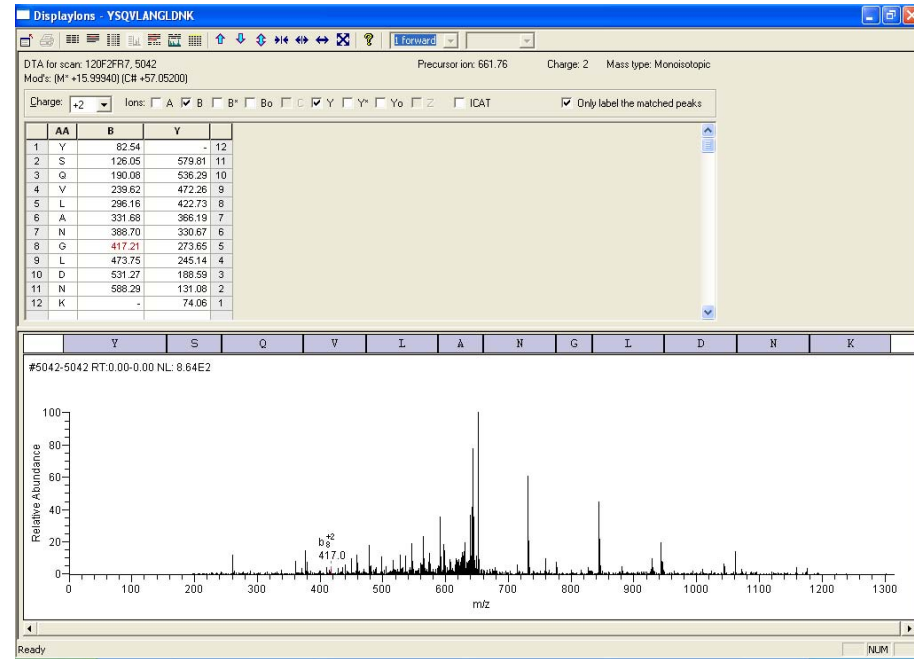

# KYVWNGELLDIKN IPI00128101.1

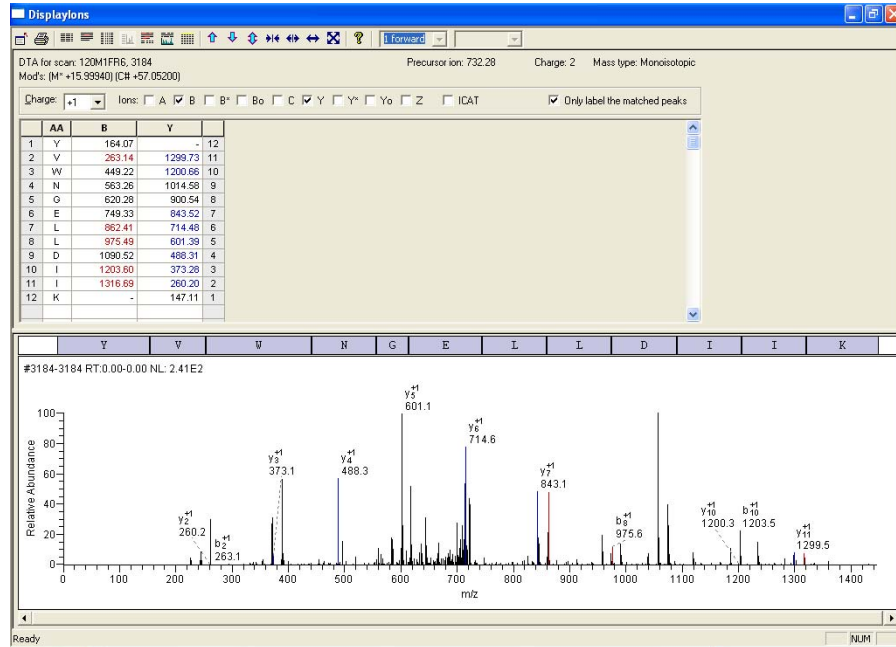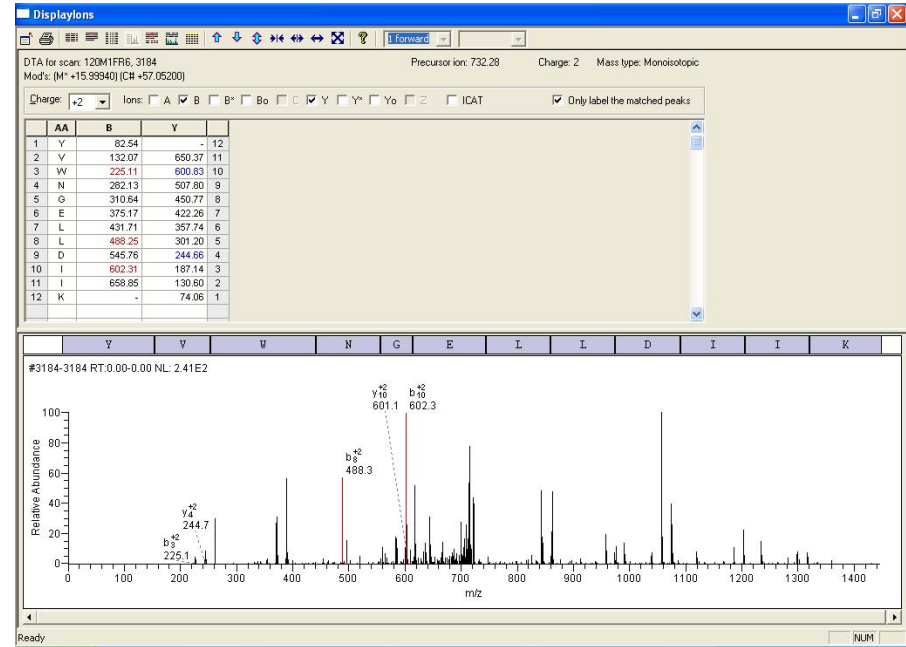

# PGGLLLGDEAPNF EANTTIGRI

## IPI00555059.1, IPI00756385.1, IPI00758024.1

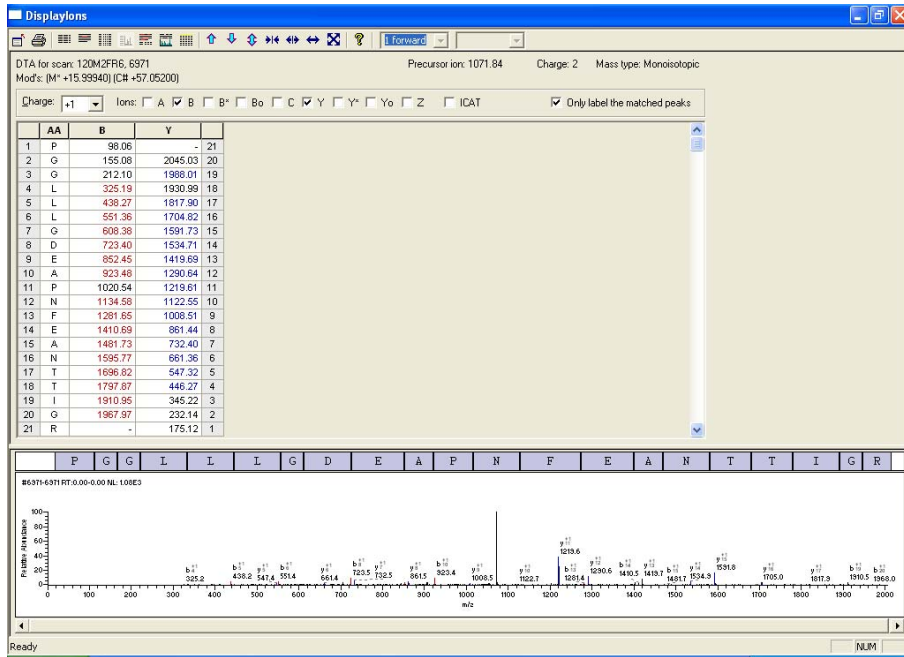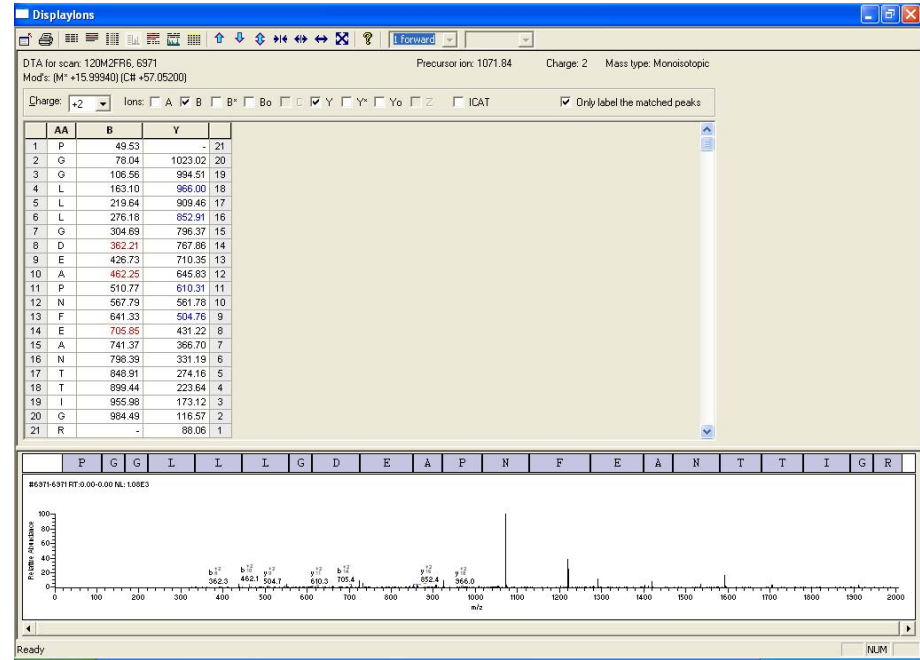

# RAAVPSGASTGIYEALERD

IPI00122684.1, IPI00228548.5, IPI00331704.6, IPI00462072.2, IPI00473227.1,  
 IPI00648260.1, IPI00649143.1, IPI00649376.1, IPI00649551.1, IPI00649925.1,  
 IPI00753302.1, IPI00756027.1

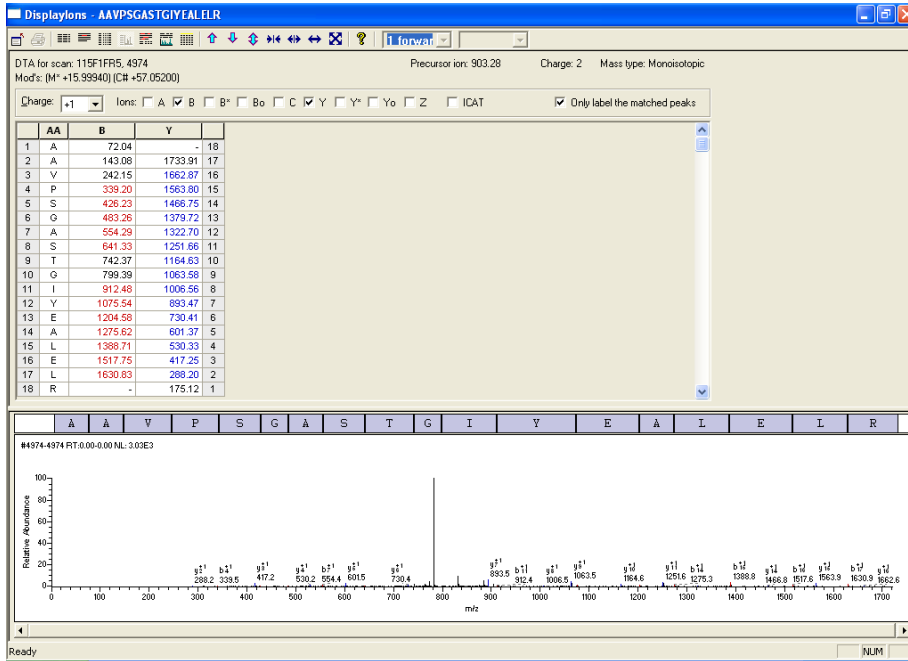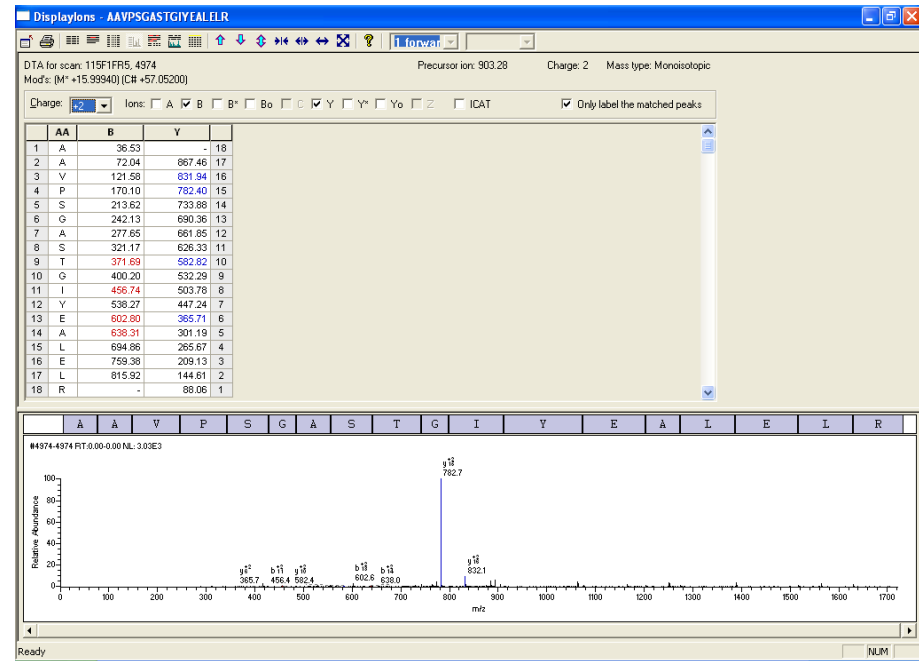

# RADALQAGASQFETSAKL

IPI00132276.1, IPI00229703.5, IPI00649355.1

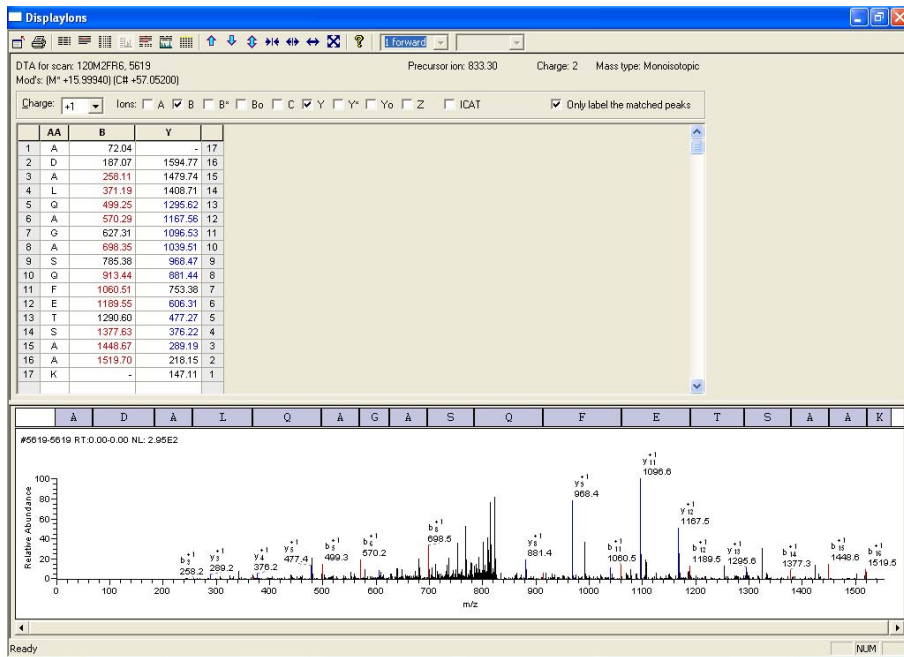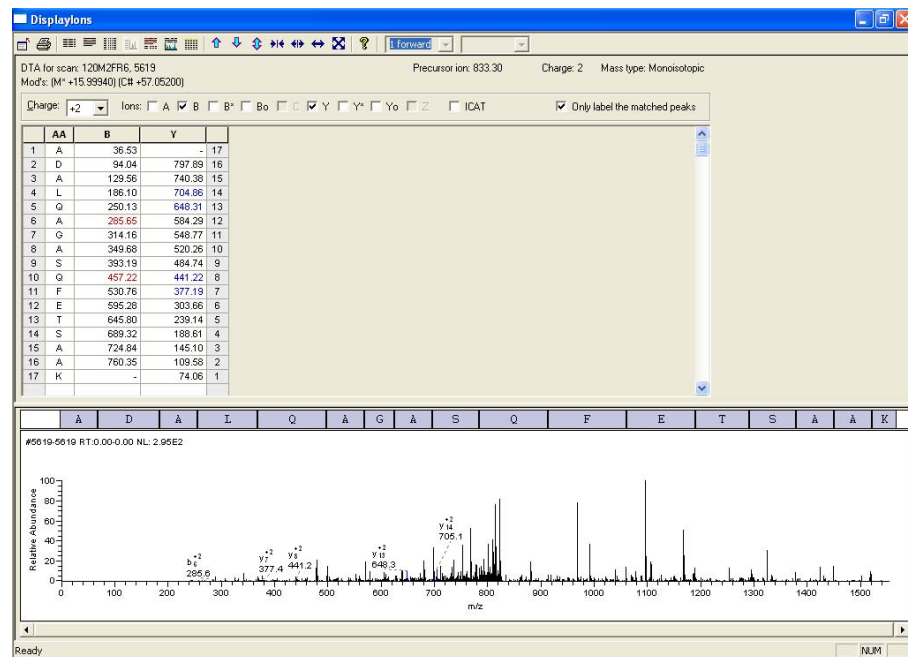



# RAEVESAQAGDRC IPI00123881.1

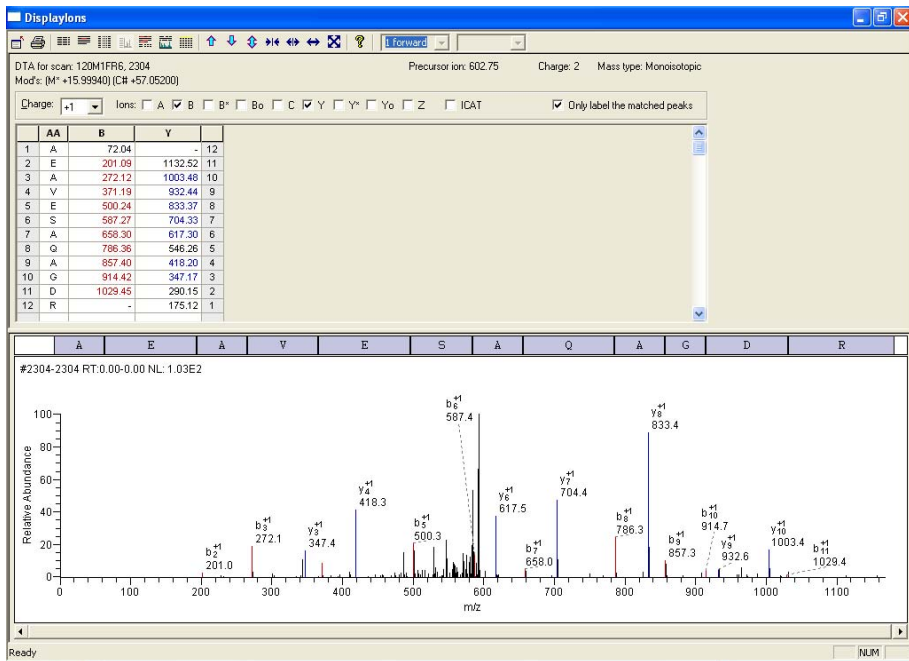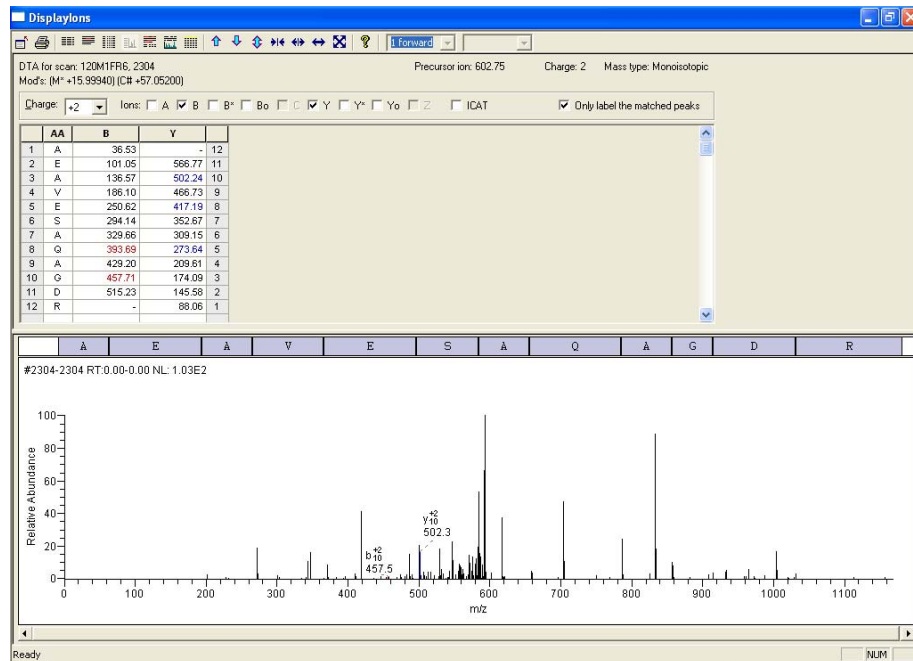

# RAGELTEDEVERV

IPI00268802.1, IPI00317590.3, IPI00381655.4, IPI00474174.1, IPI00620156.1,  
IPI00660316.1, IPI00669224.2, IPI00752364.1

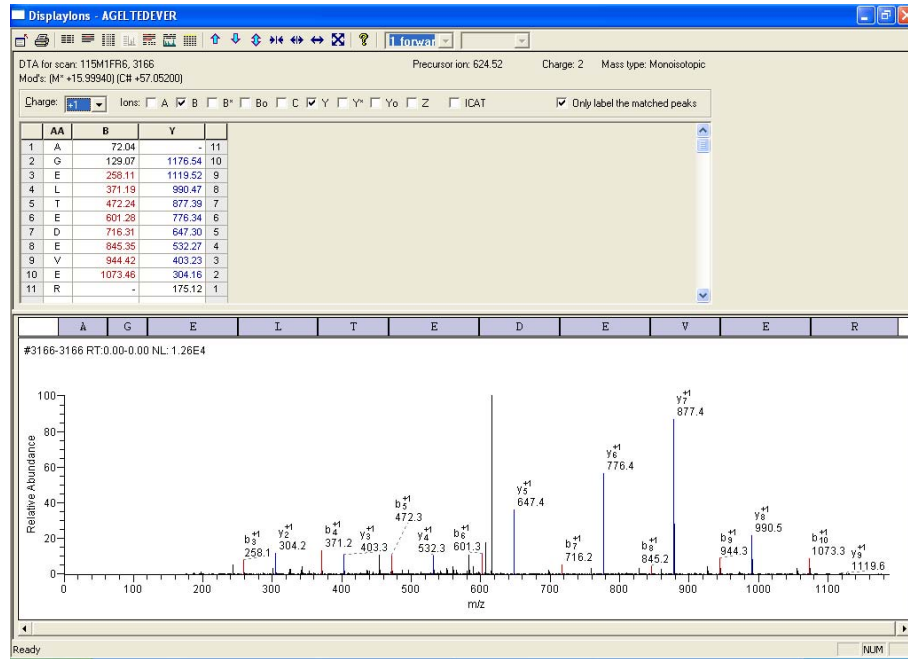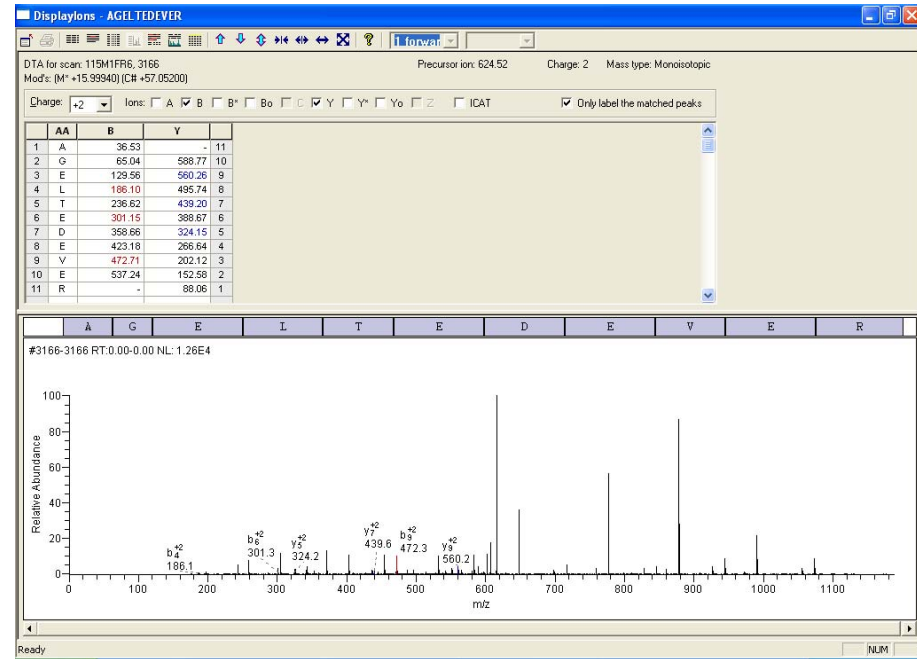

# RAGVNTVTTLVENKK

IPI00122931.4, IPI00265107.4, IPI00330363.7, IPI00354363.3, IPI00356199.5,  
 IPI00461356.1, IPI00462006.3, IPI00462453.4, IPI00622160.3, IPI00751517.1,  
 IPI00755770.1, IPI00756848.1, IPI00757168.1, IPI00757549.1, IPI00761338.1

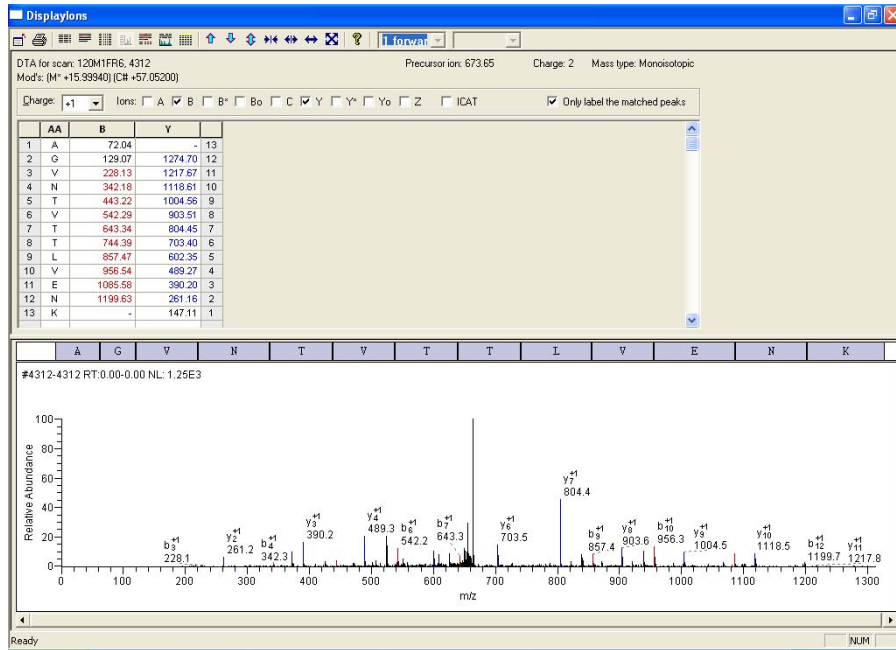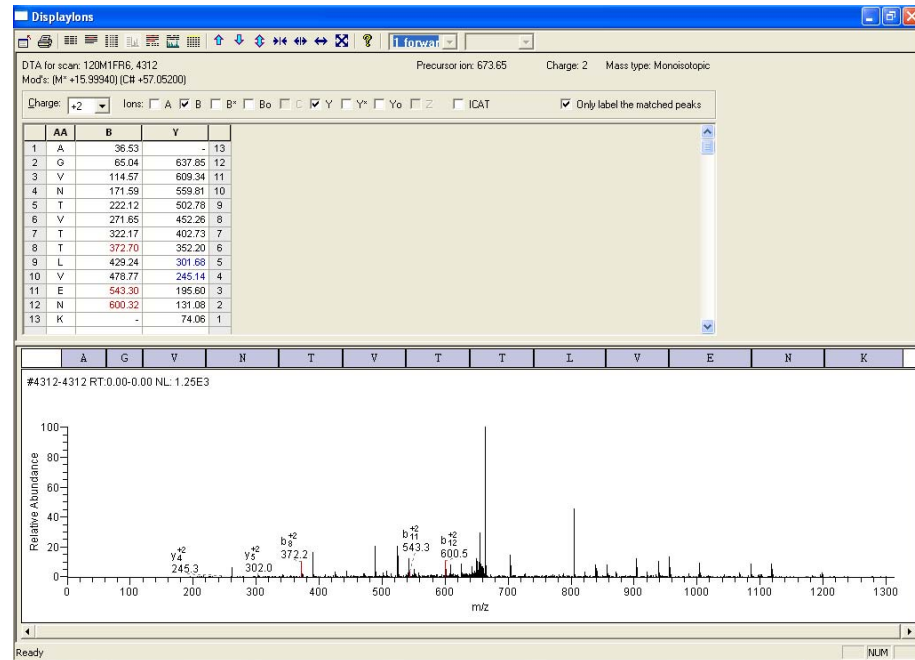

# RAIGNIVTGTDEQTQKV

IPI00124973.1, IPI00605492.2, IPI00750464.1

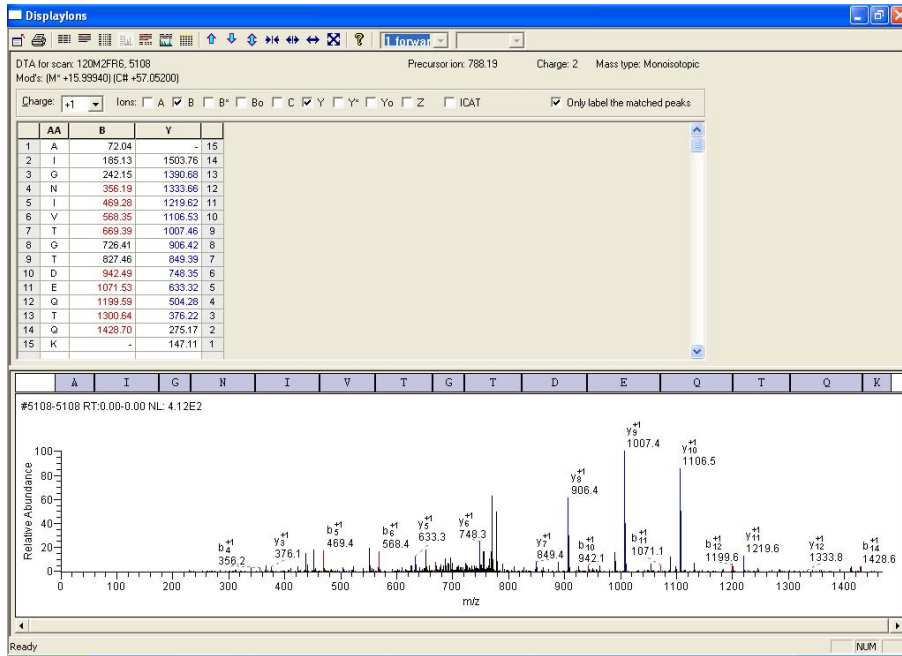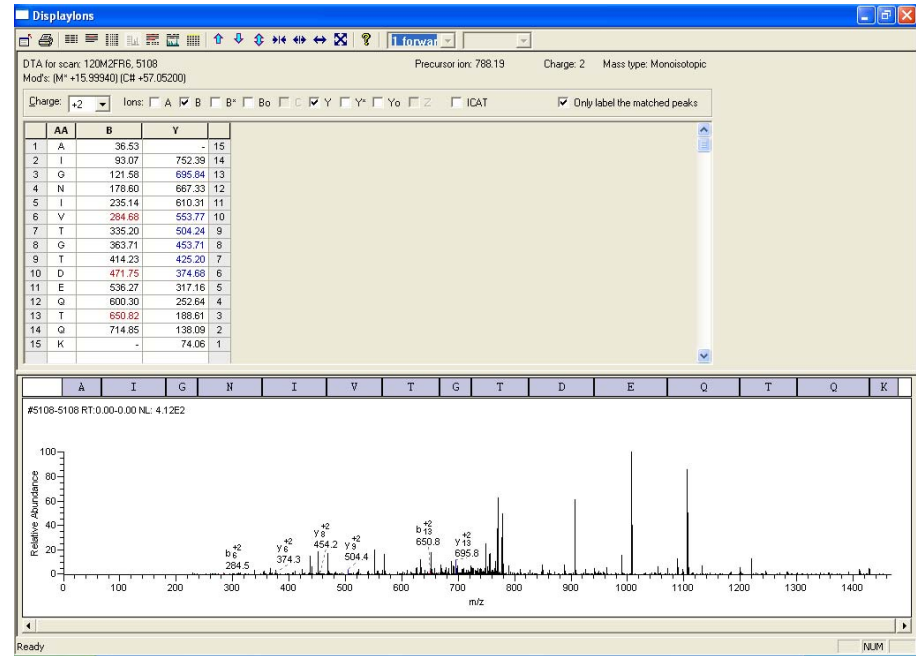

# RAIVAIENPADVSVISSRN

IPI00111272.1, IPI00123604.2, IPI00126010.5, IPI00469351.3, IPI00553810.1,  
IPI00606764.1, IPI00622968.1, IPI00677305.1, IPI00753827.1

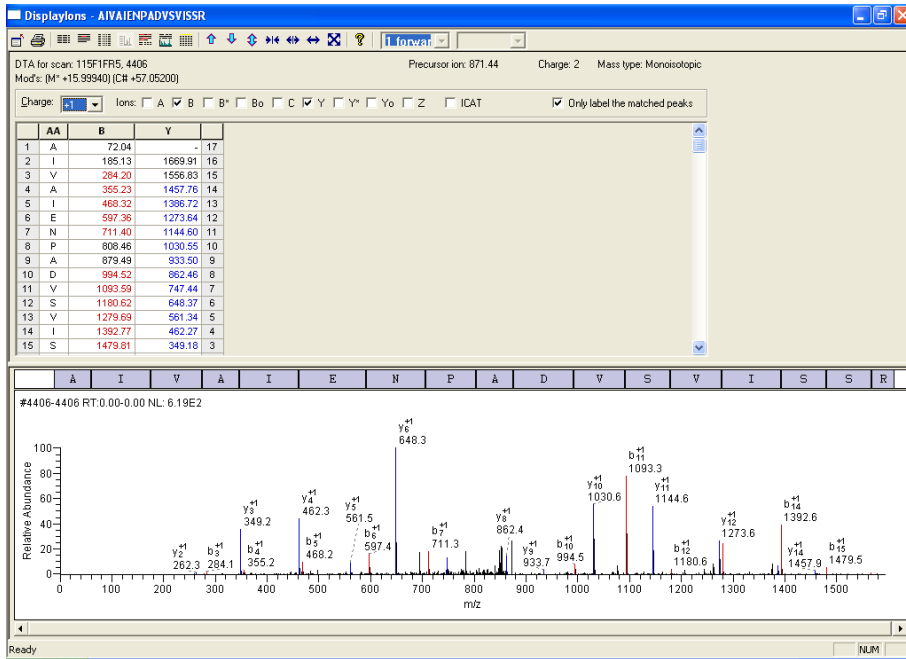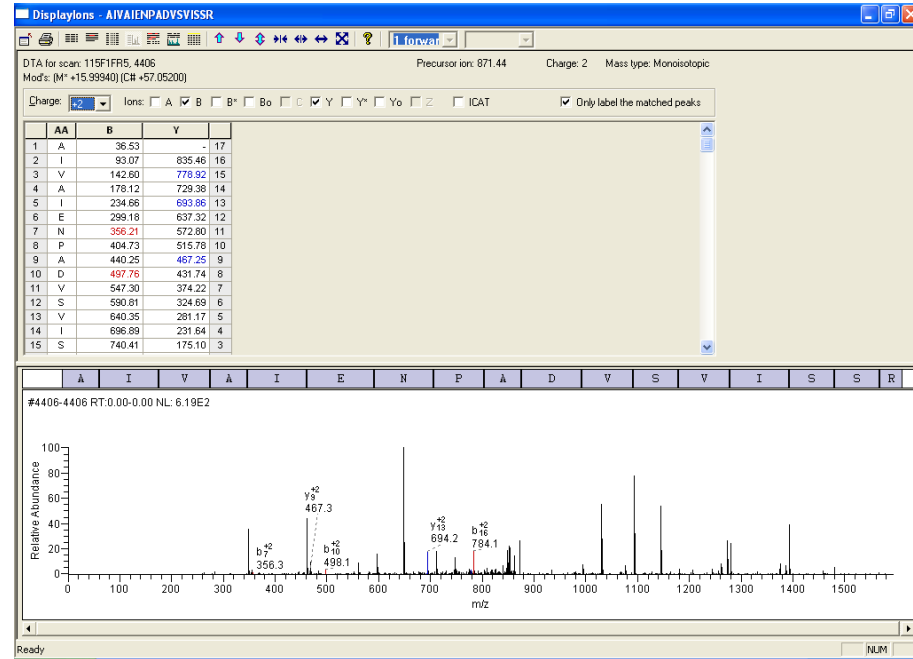

# RAKEAAEQDVEKK

IPI00134097.1, IPI00224505.6, IPI00675368.1

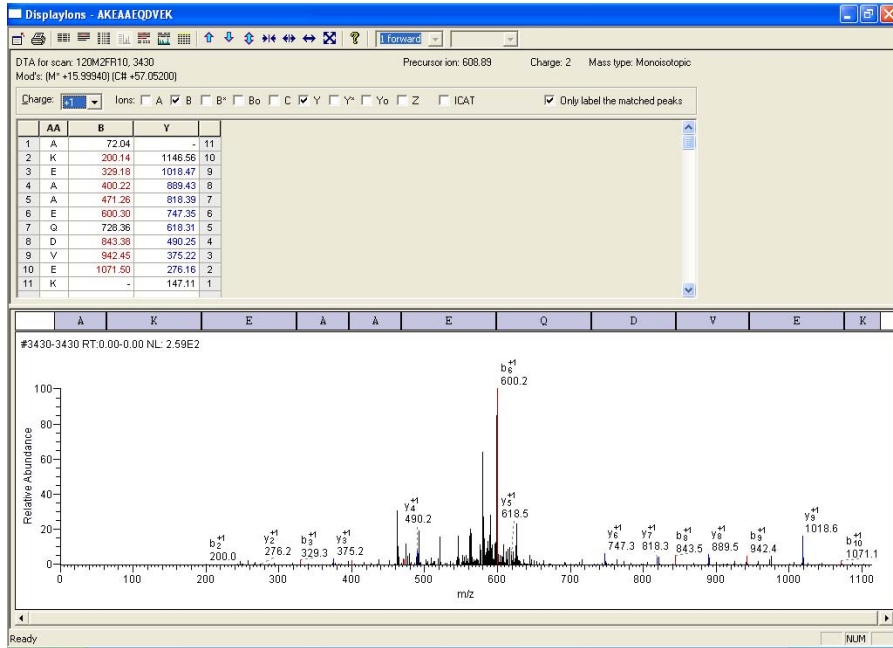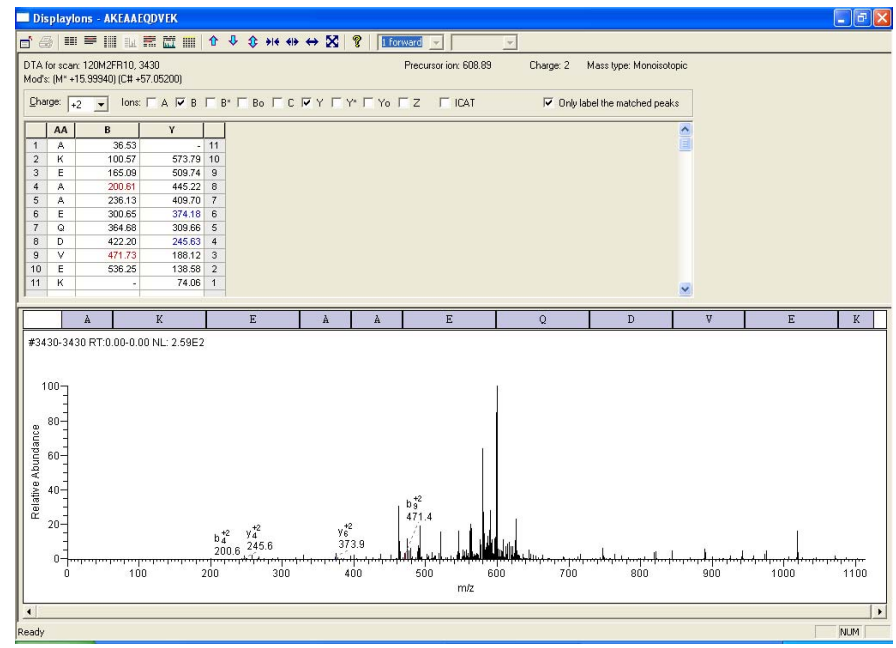

# RALEESNYELEGKI

## IPI00110670.3, IPI00750213.1, IPI00755181.1, IPI00757388.1

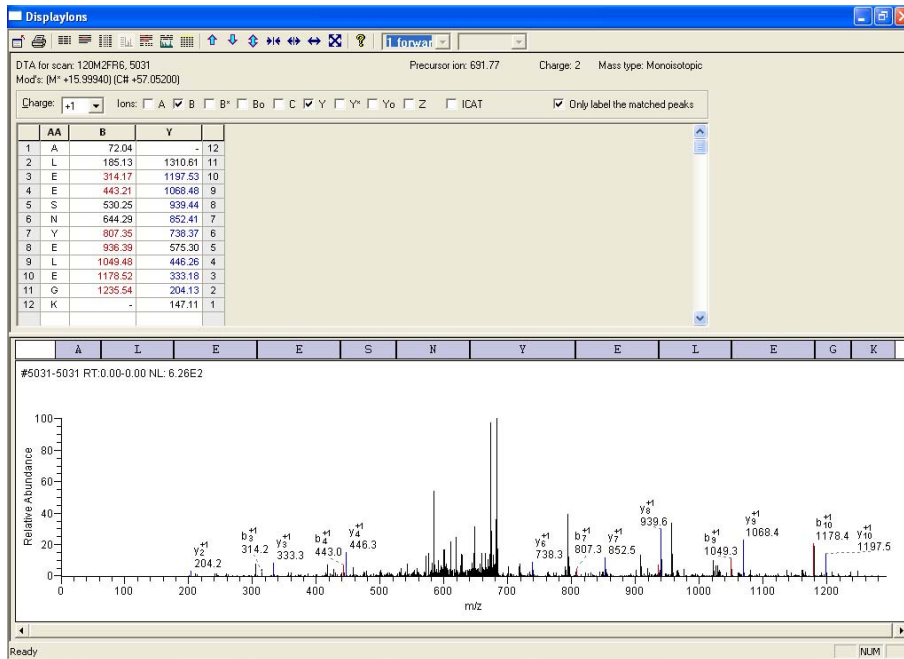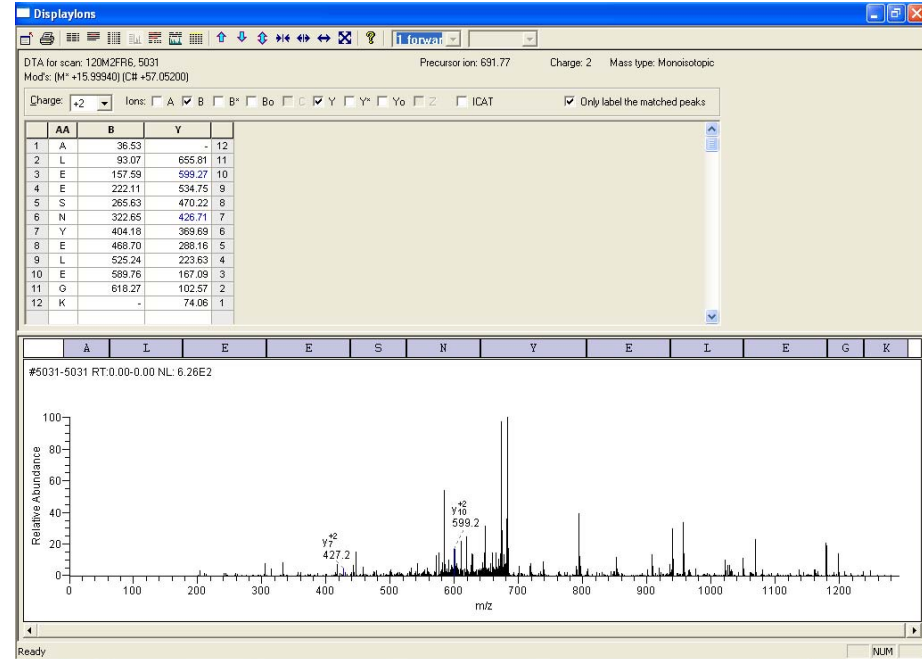

# RATAGYIASQTVKK

## IPI00317902.3

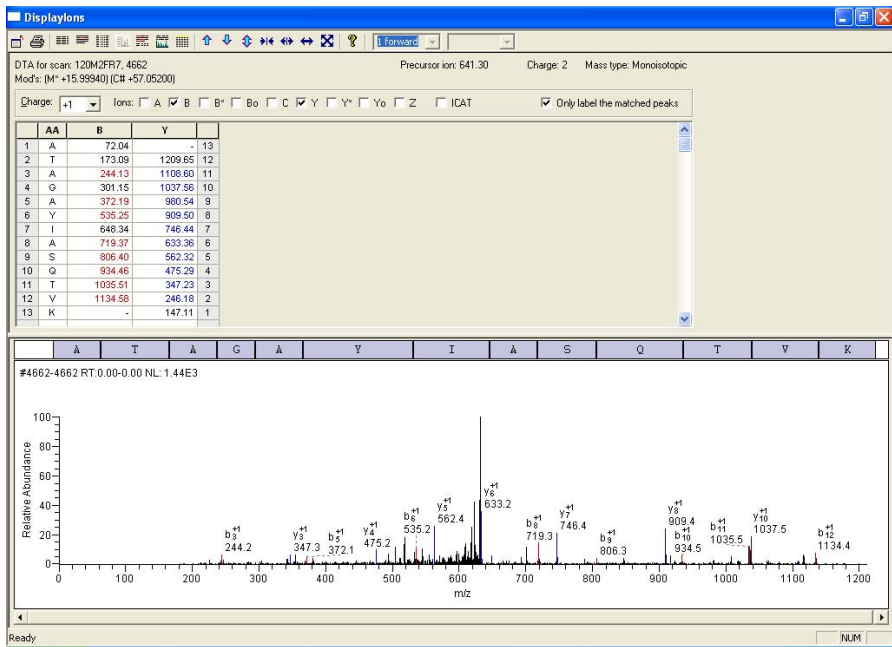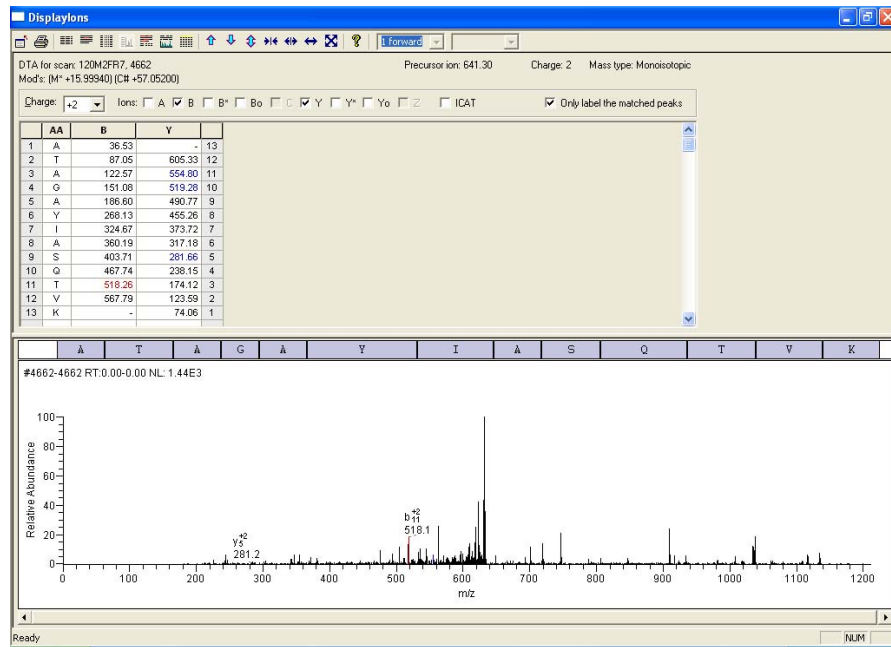



# RATTLNAVSSLASTGLSLTKV

IPI00264501.8, IPI00321378.3, IPI00404434.1, IPI00404435.1, IPI00404436.1,  
IPI00404438.1

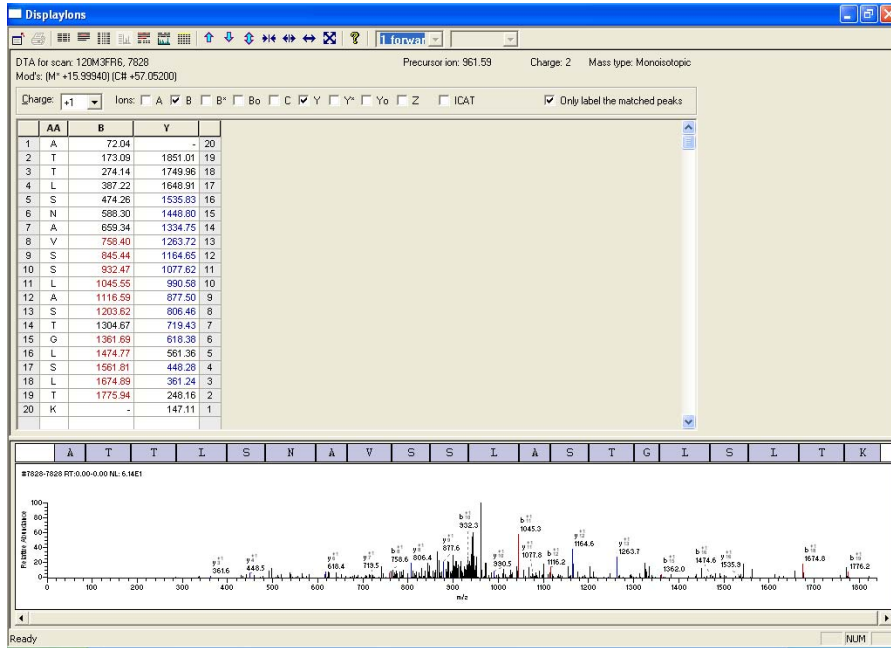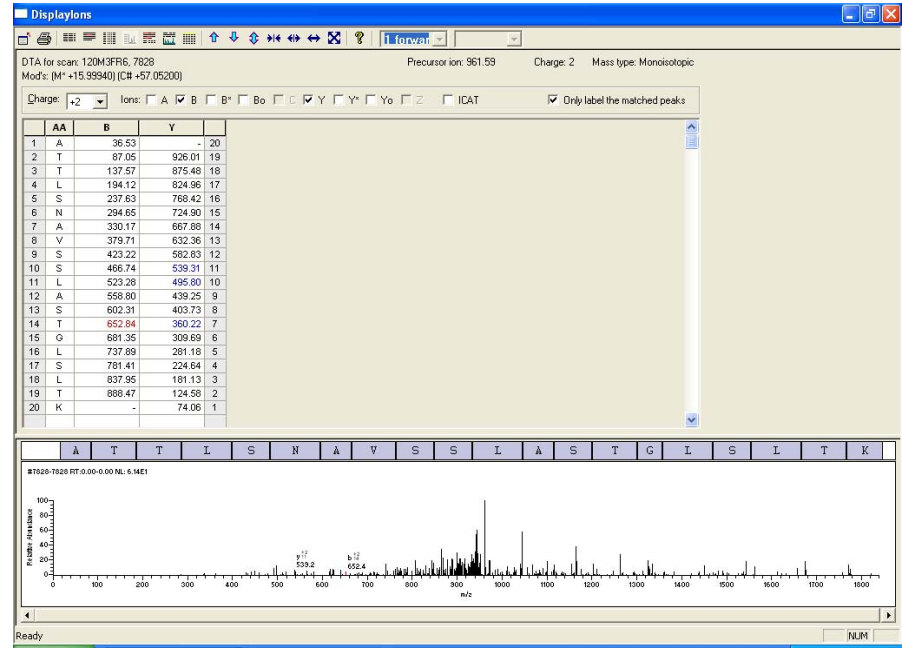

# RAVAVVVDPIQSVKG IPI00113262.1

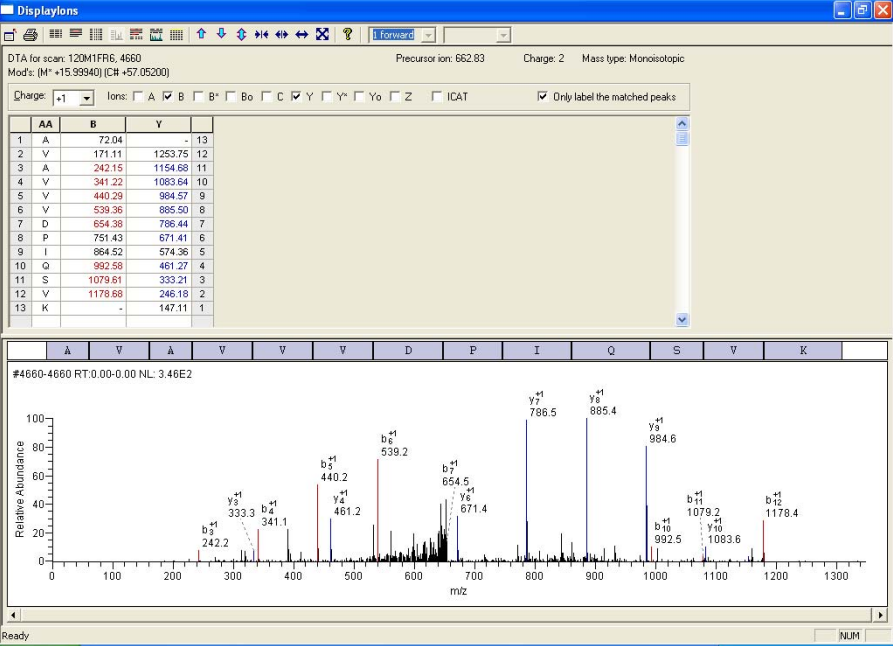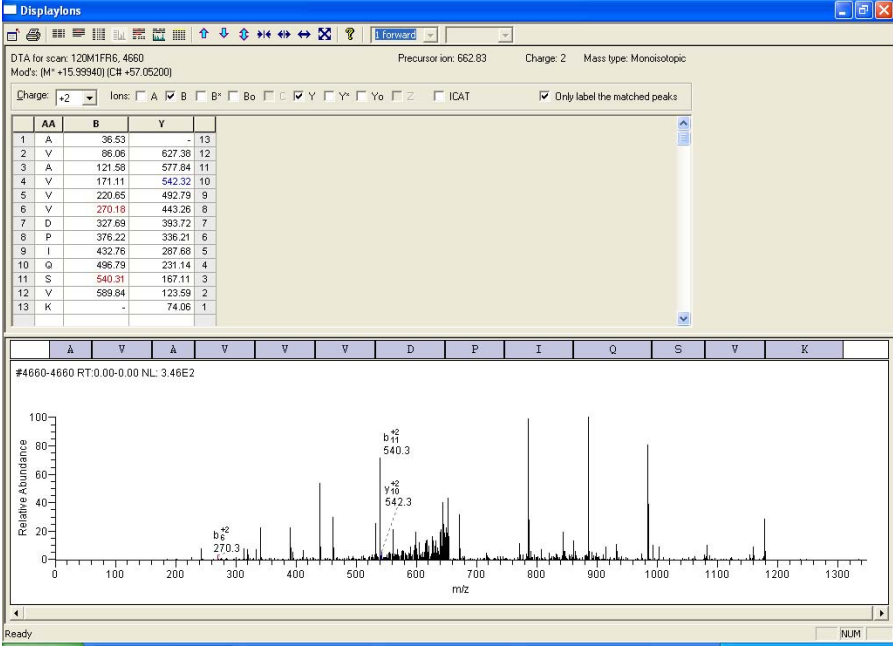

# RAVFPSIVGRPRH

IPI00110827.1, IPI00110850.1, IPI00110851.1, IPI00114593.1, IPI00117043.1,  
 IPI00266875.5, IPI00404804.1, IPI00473320.2, IPI00480406.1, IPI00648161.1,  
 IPI00648420.1, IPI00652436.2, IPI00653007.1, IPI00654242.1, IPI00751076.1,  
 IPI00754167.1

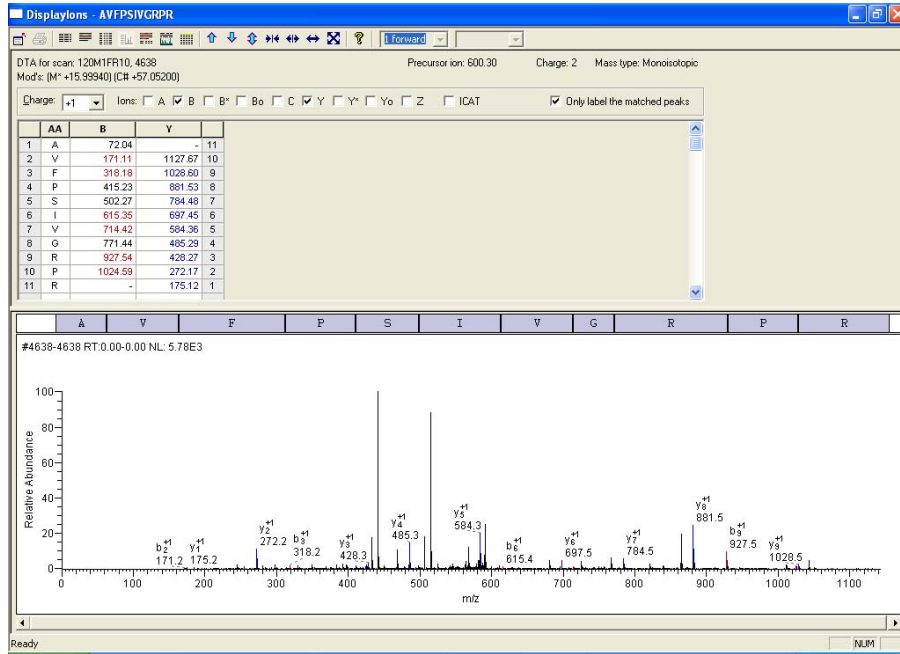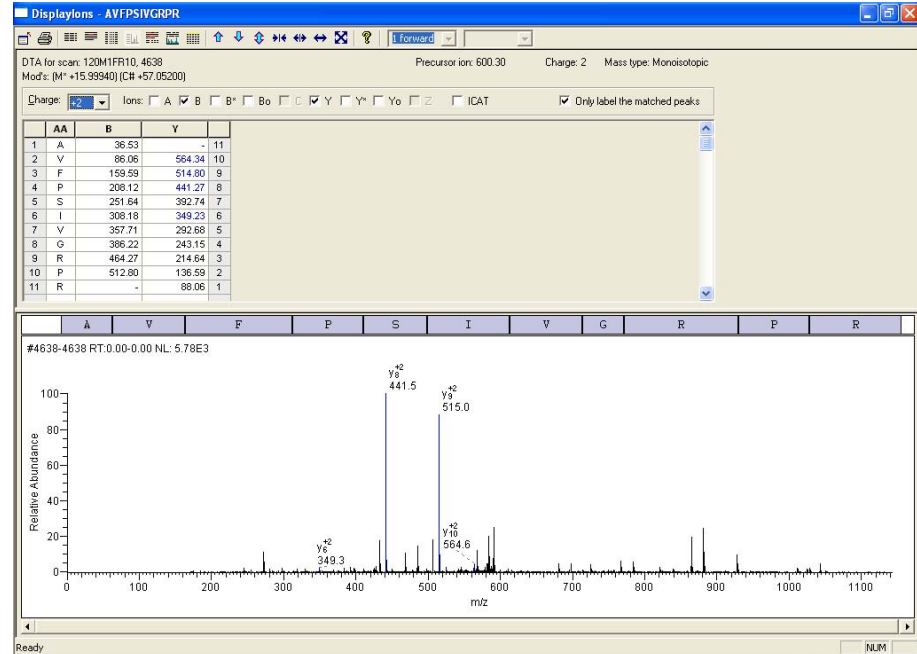

# RCLCIQEHSEFIPLKLIK IPI00126132.1

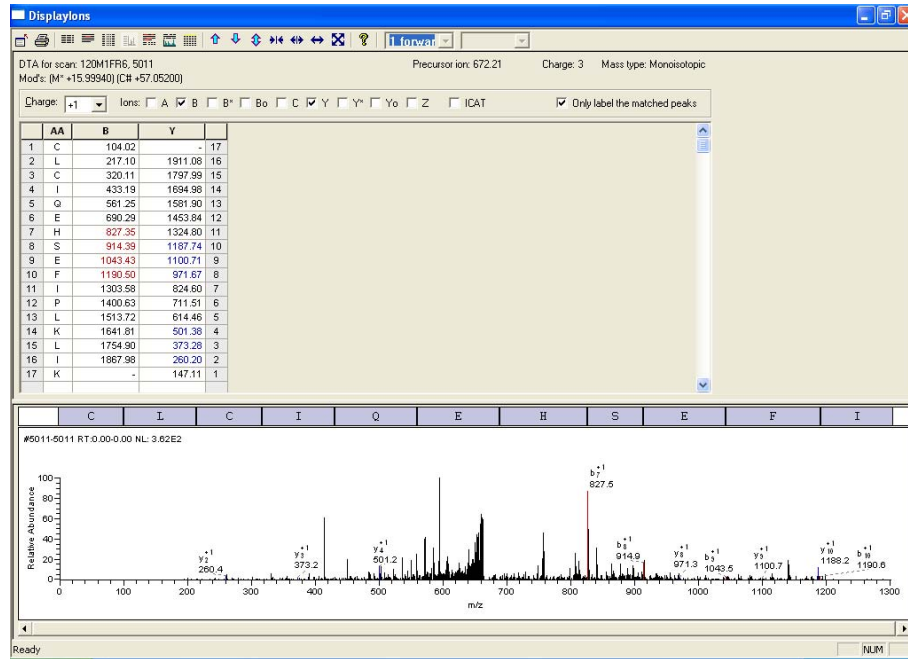

# RCLCIQEHSEFIPLKLIK IPI00126132.1

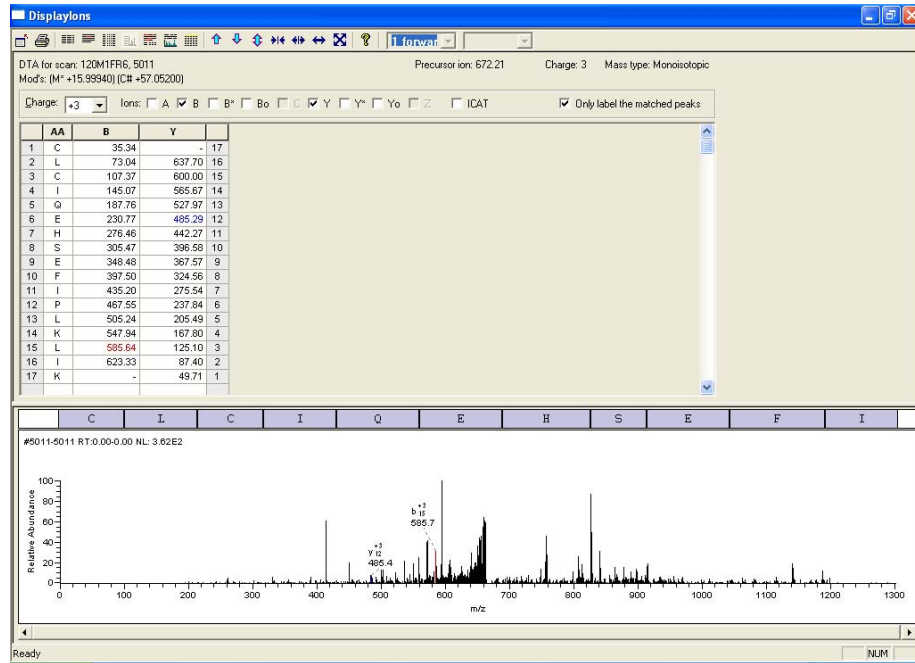

# RCWEVIDAQAEMALRS IPI00110006.3

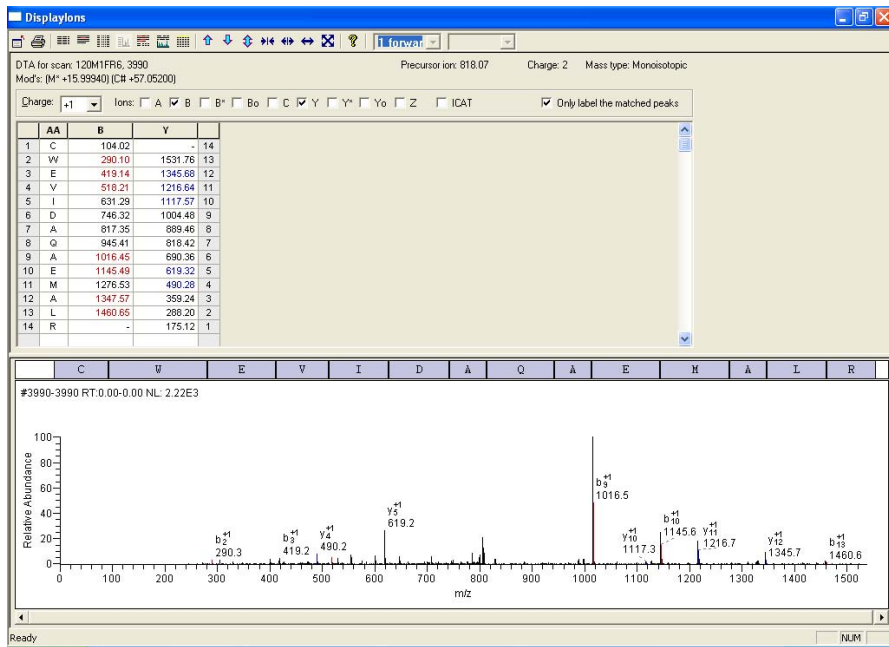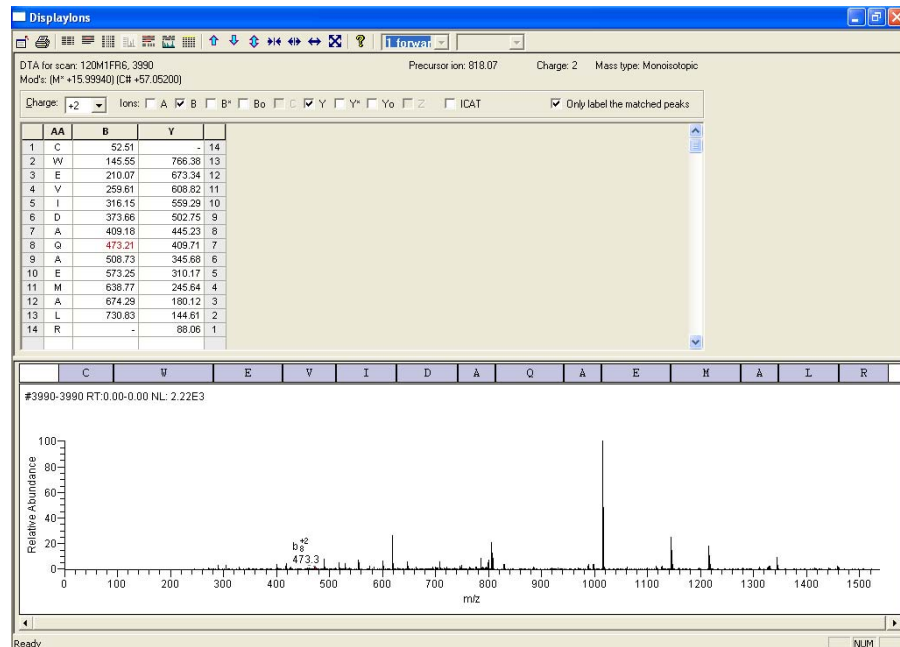

# RDADDAVYELNSKE IPI00310880.4

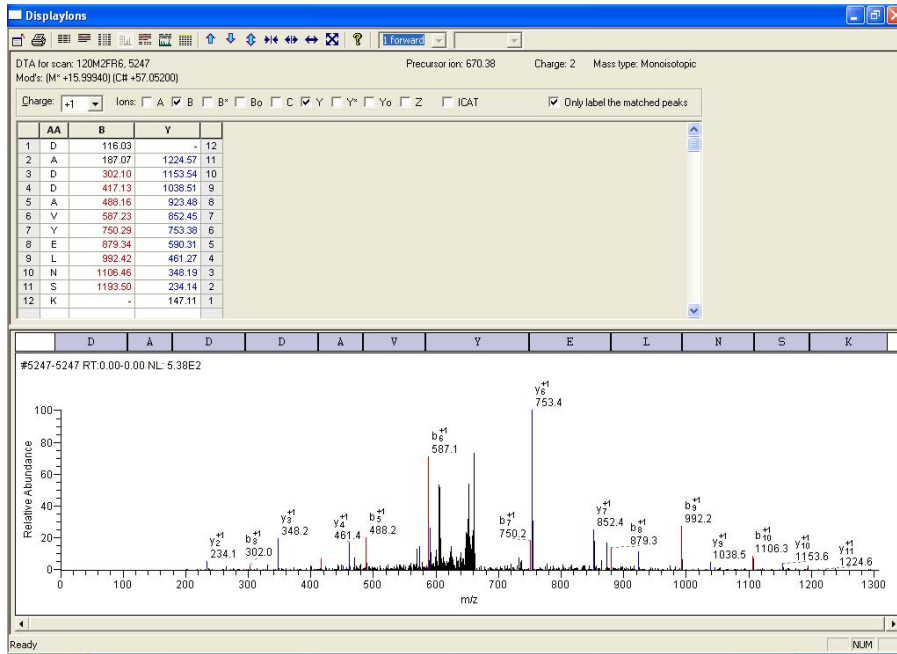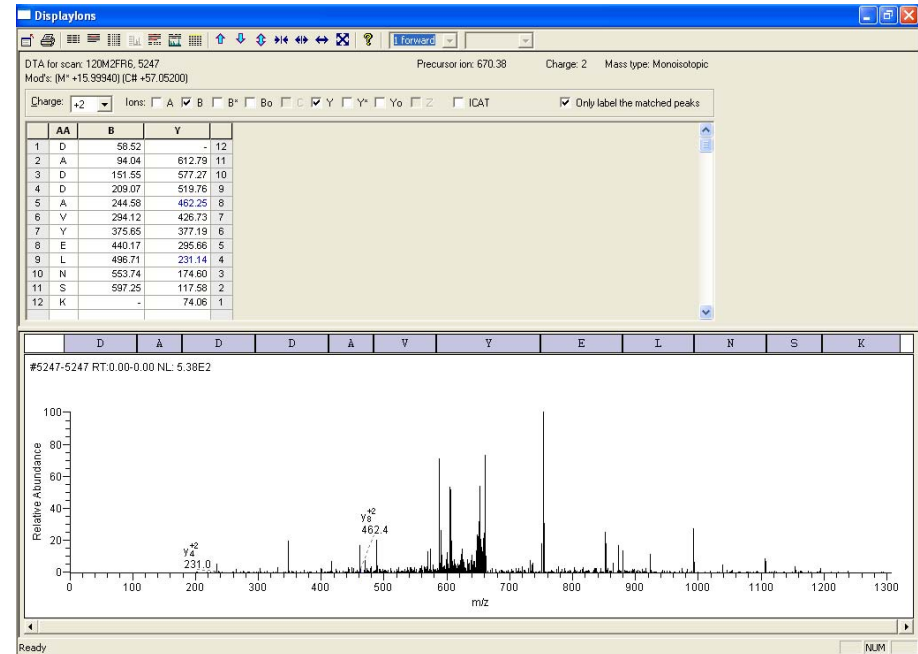

# RDIGEGNLSTAAAAALAAAVKA

IPI00381019.1, IPI00459742.2, IPI00651846.1

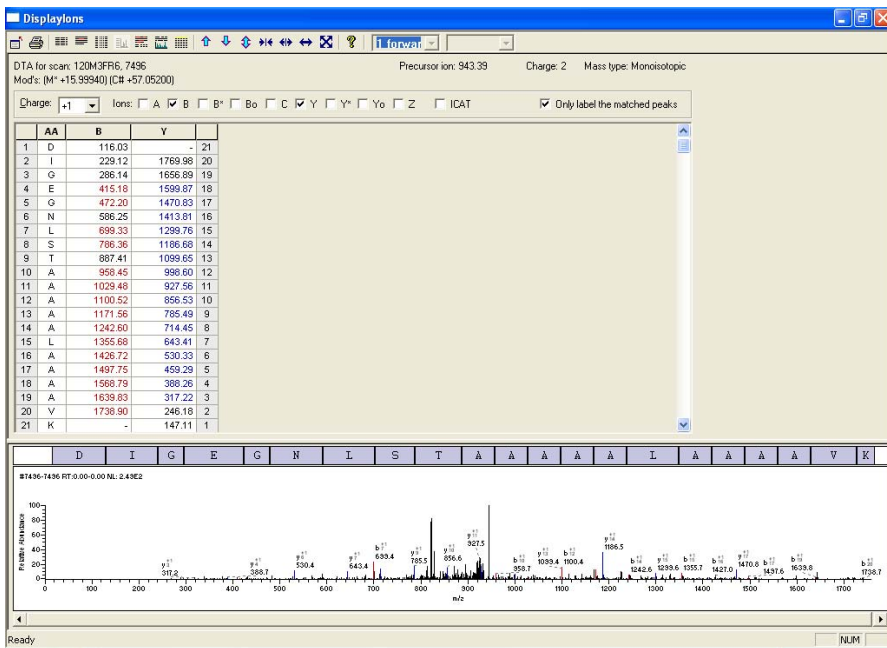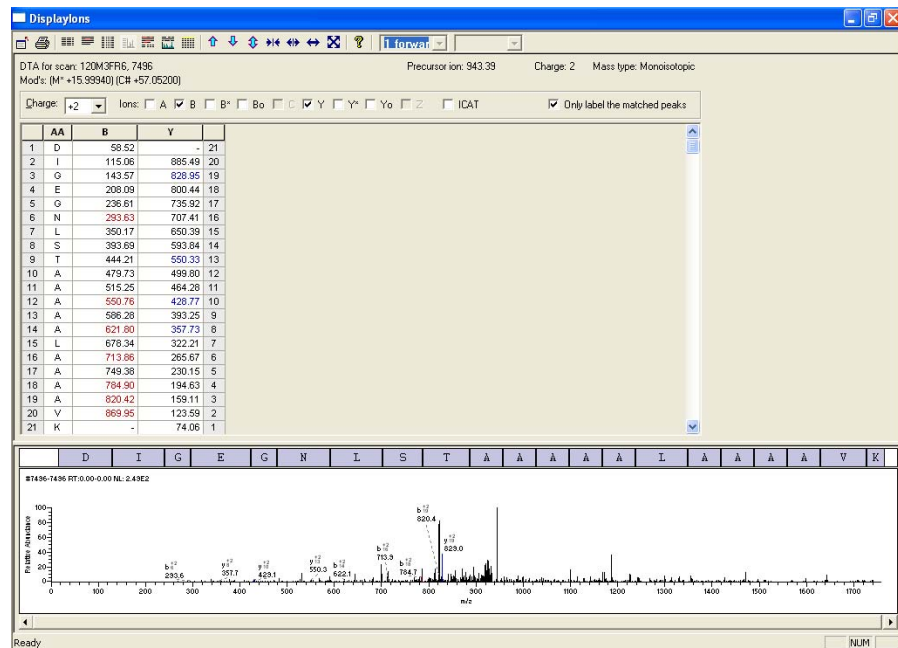



# RDKLNNLVLFDKA

IPI00115992.1, IPI00137735.1, IPI00461419.2, IPI00605858.2, IPI00625320.2,  
IPI00677917.1

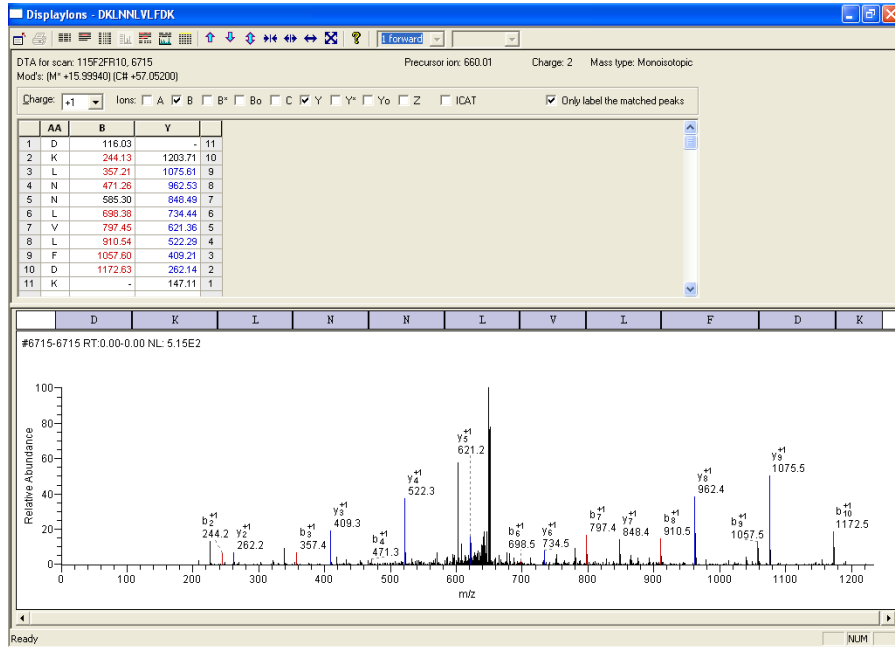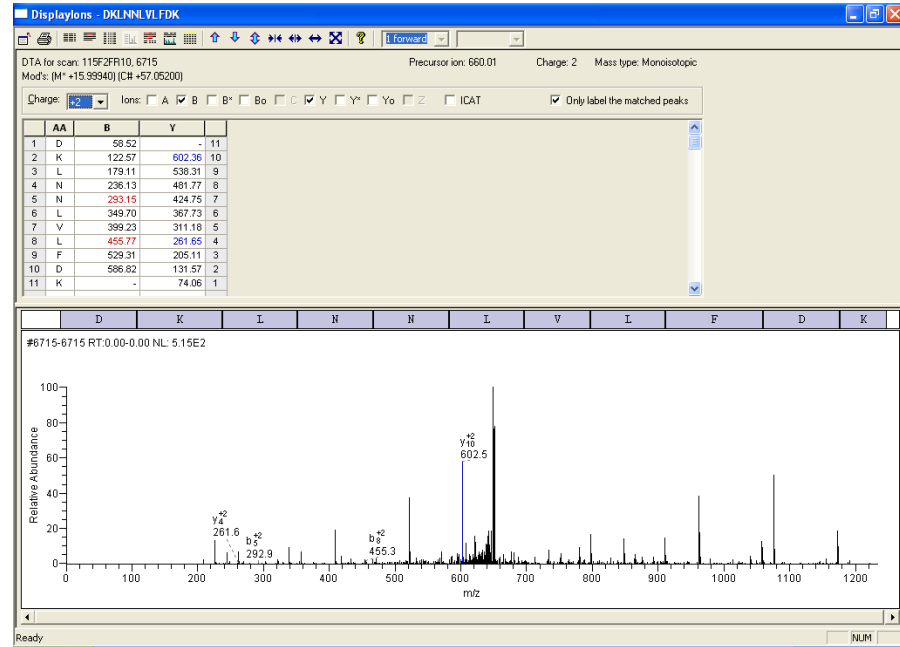

# RDLSSVQTLTKQ

IPI00137368.6, IPI00606339.1, IPI00756038.1

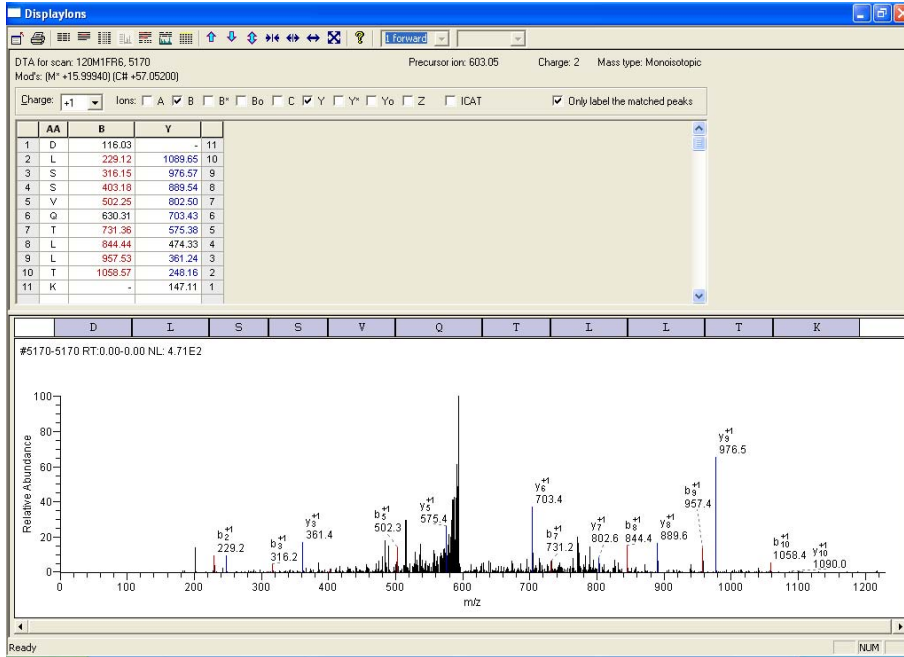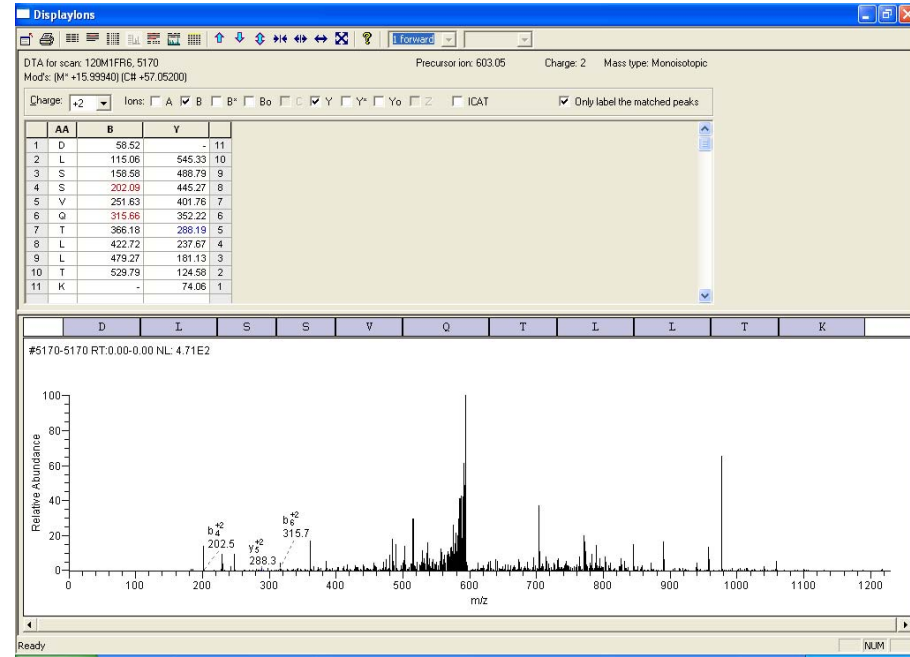

# RDQTPDENEEVIVRI

## IPI00338748.3, IPI00761863.1

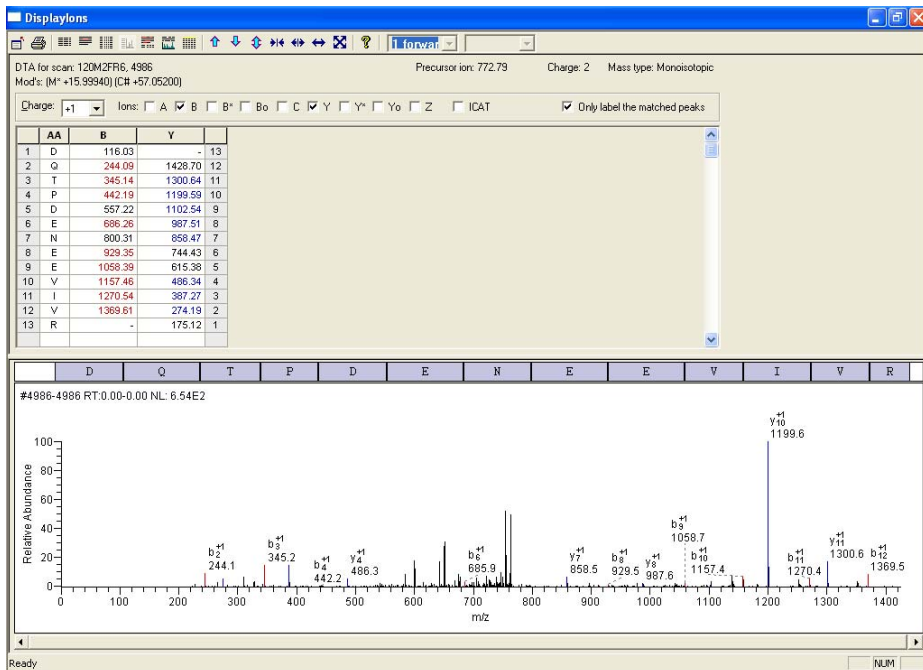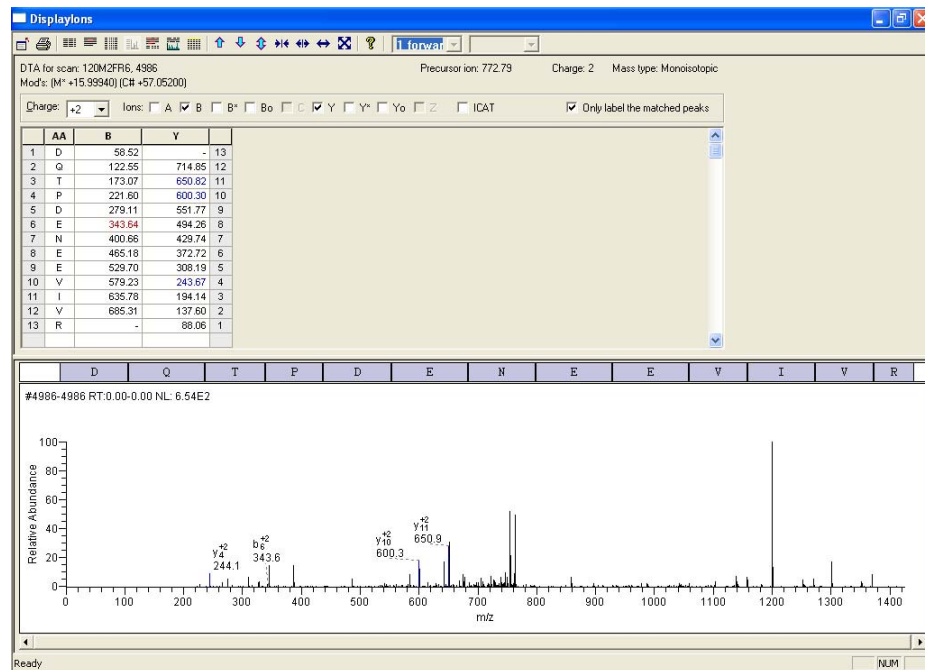

# RDVIAQSQSGTGKT

IPI00126716.2, IPI00127479.4, IPI00407909.1, IPI00458502.2, IPI00648352.1,  
IPI00750063.1, IPI00758278.1

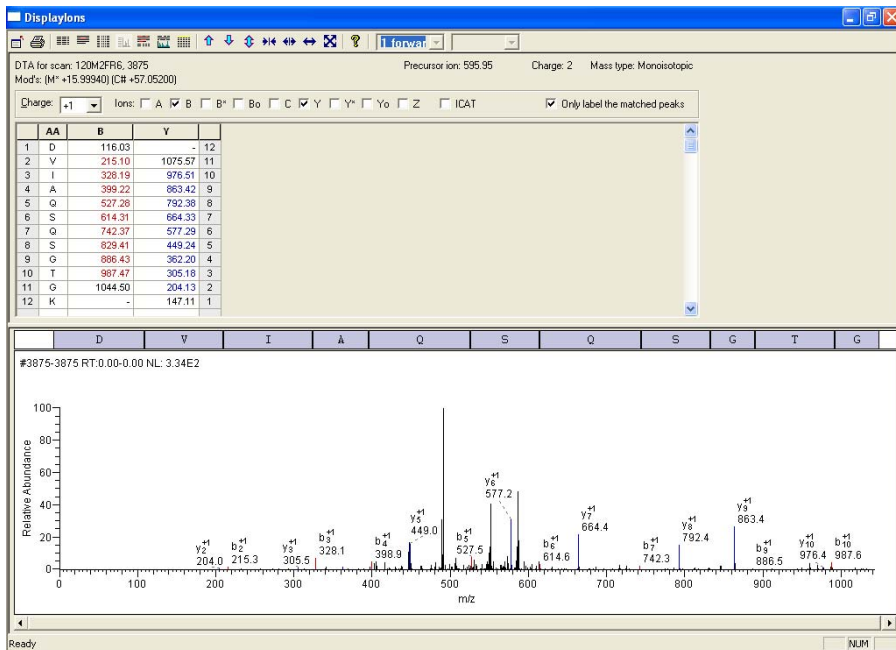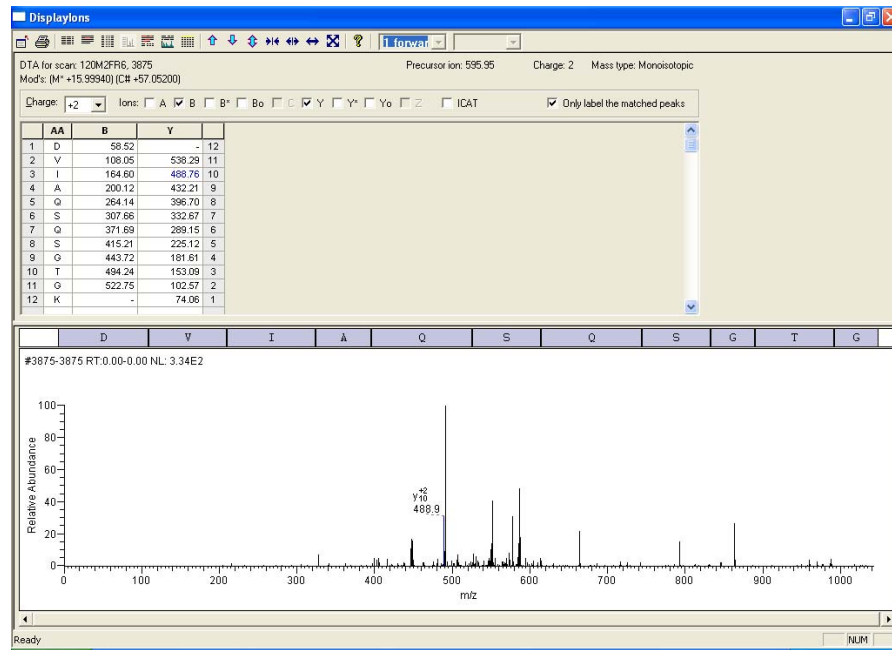

# REDSQRPGAHLTVKK

IPI00224251.5, IPI00461698.5, IPI00480230.2, IPI00553777.2, IPI00621201.3,  
IPI00753579.1, IPI00753723.1, IPI00762816.1

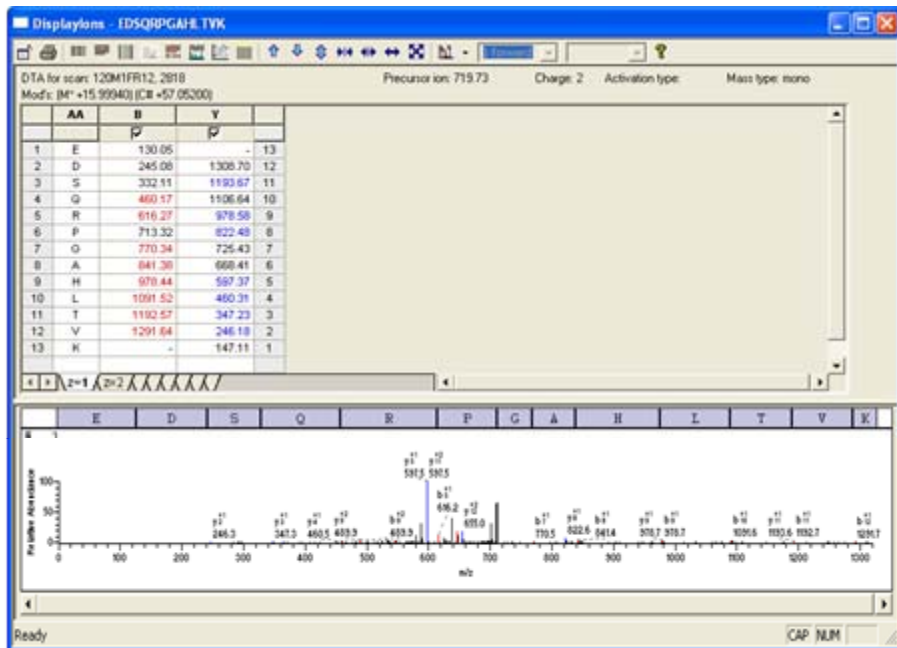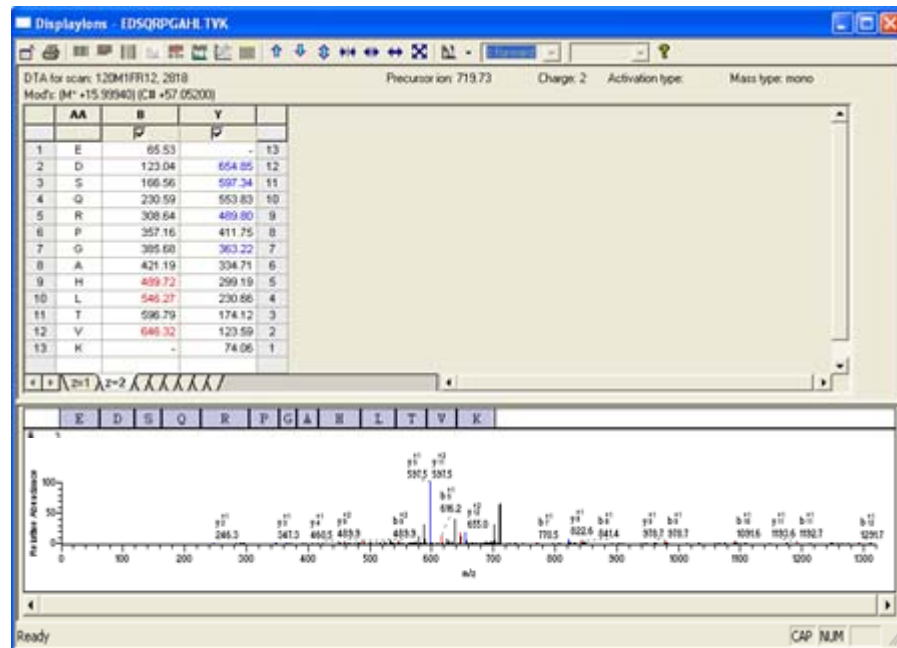

# REDSVKPGAHLTVKK

IPI00269661.1, IPI00269662.1, IPI00458033.5, IPI00459722.2, IPI00461800.1,  
 IPI00466185.3, IPI00470076.5, IPI00623731.1, IPI00659723.1, IPI00660502.1,  
 IPI00662419.1, IPI00663550.1, IPI00664047.1, IPI00664791.1, IPI00667787.1,  
 IPI00668954.1, IPI00670004.1, IPI00670189.1, IPI00670681.1, IPI00670732.1,  
 IPI00672470.2, IPI00673782.1, IPI00674033.2, IPI00674712.1, IPI00675624.1,  
 IPI00675934.4, IPI00677689.2, IPI00677959.1, IPI00678360.2, IPI00749630.1,  
 IPI00749895.1, IPI00750059.1, IPI00750283.1, IPI00750401.1, IPI00750428.1,  
 IPI00751134.1, IPI00752179.1, IPI00753691.1, IPI00754589.1, IPI00754734.1,  
 IPI00755861.1, IPI00756768.1, IPI00757273.1, IPI00757339.1, IPI00757344.1,  
 IPI00757731.1

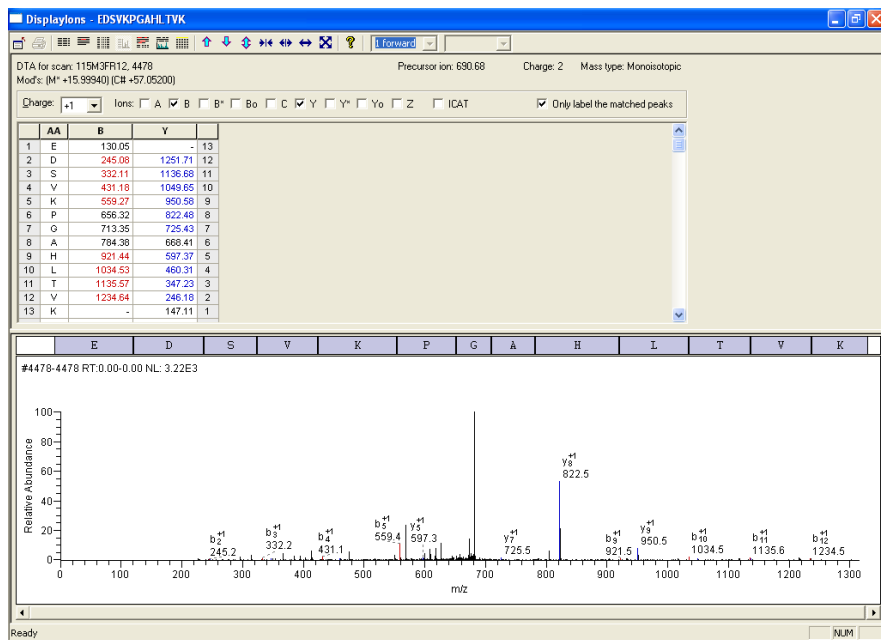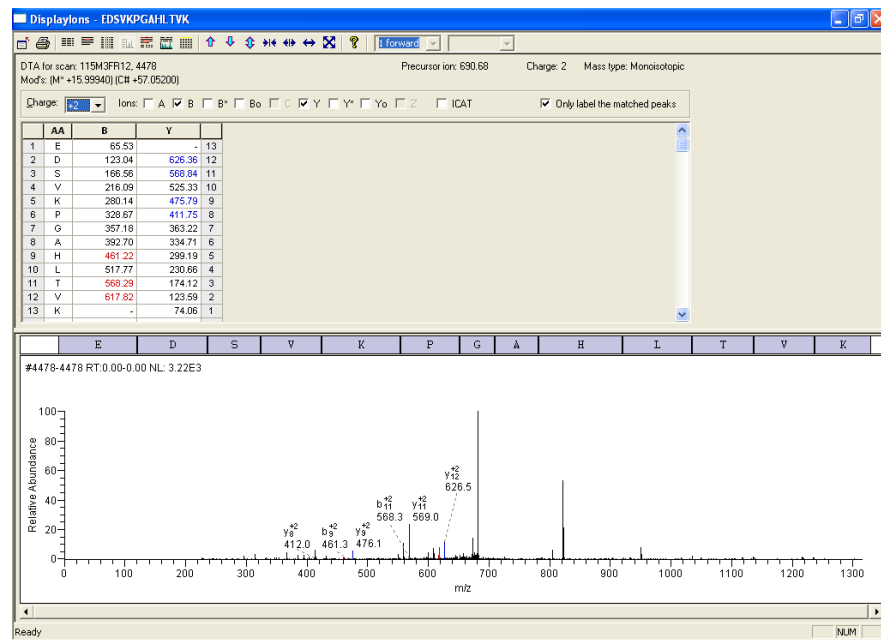

# REFVAVTGTEEDRA

IPI00387232.1, IPI00399449.1, IPI00399450.1, IPI00756894.1

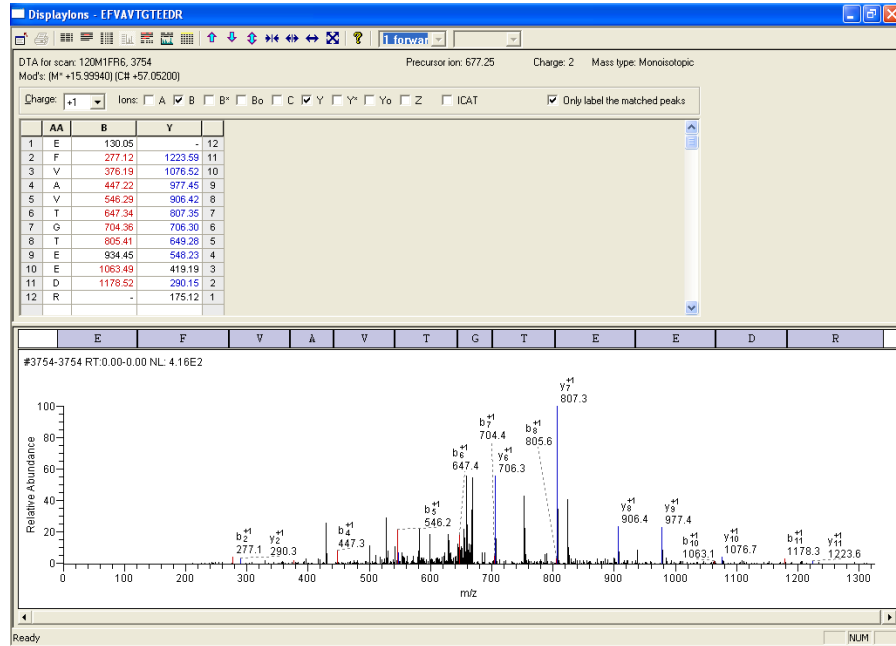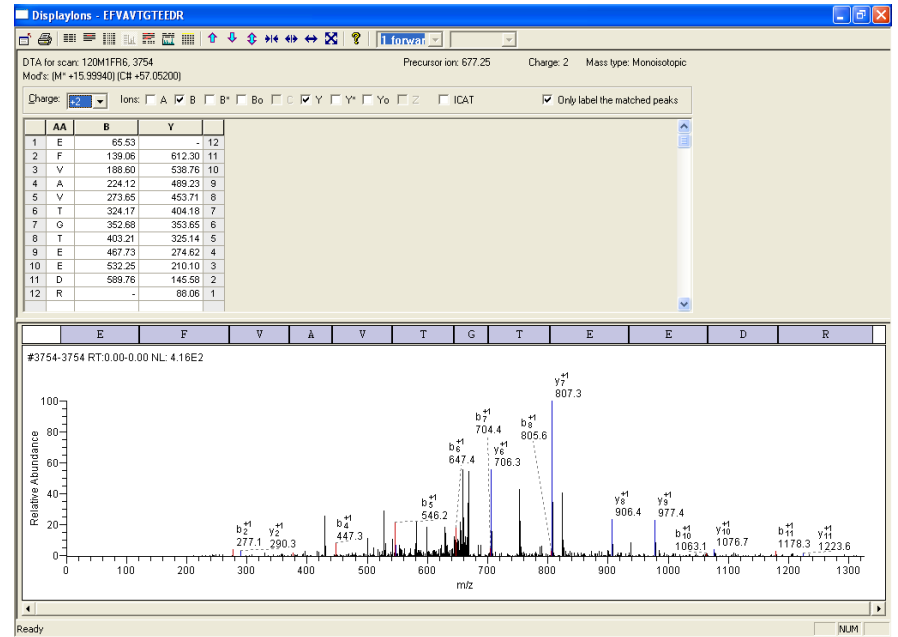

# REGDVLTLLESERE

## IPI00137736.1, IPI00719947.2

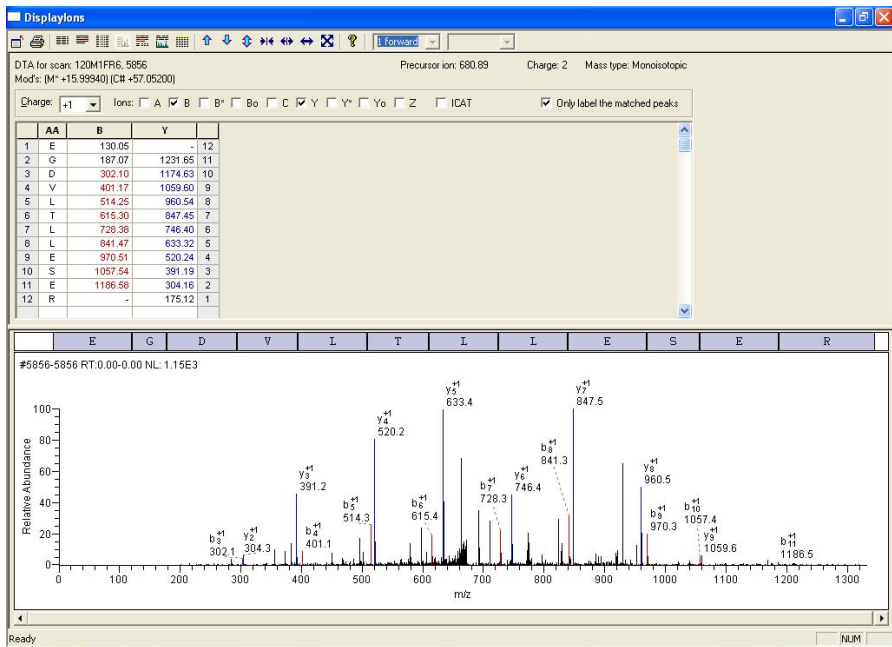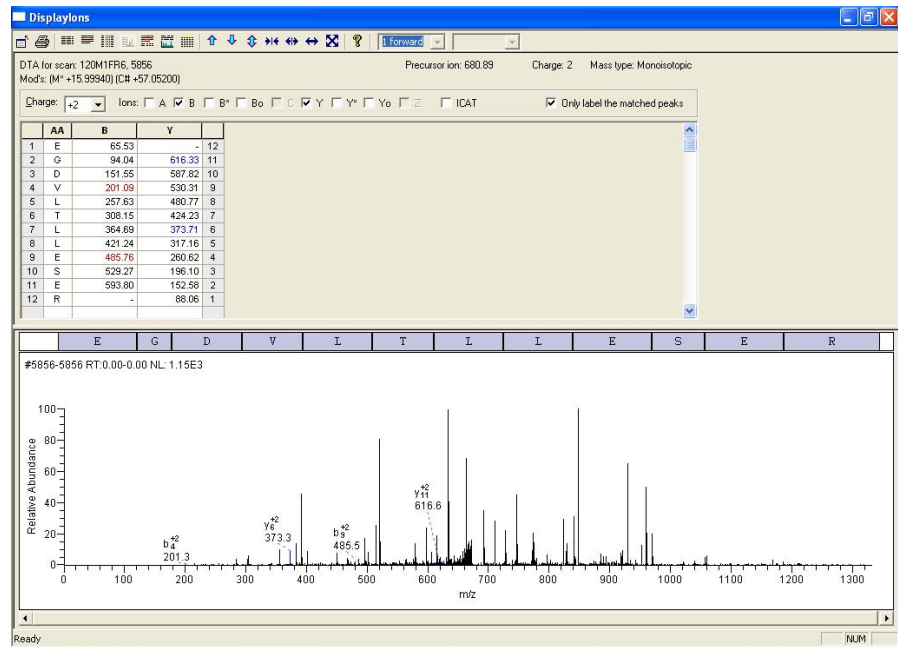



# RELDLPEELVSRH IPI00351252.4

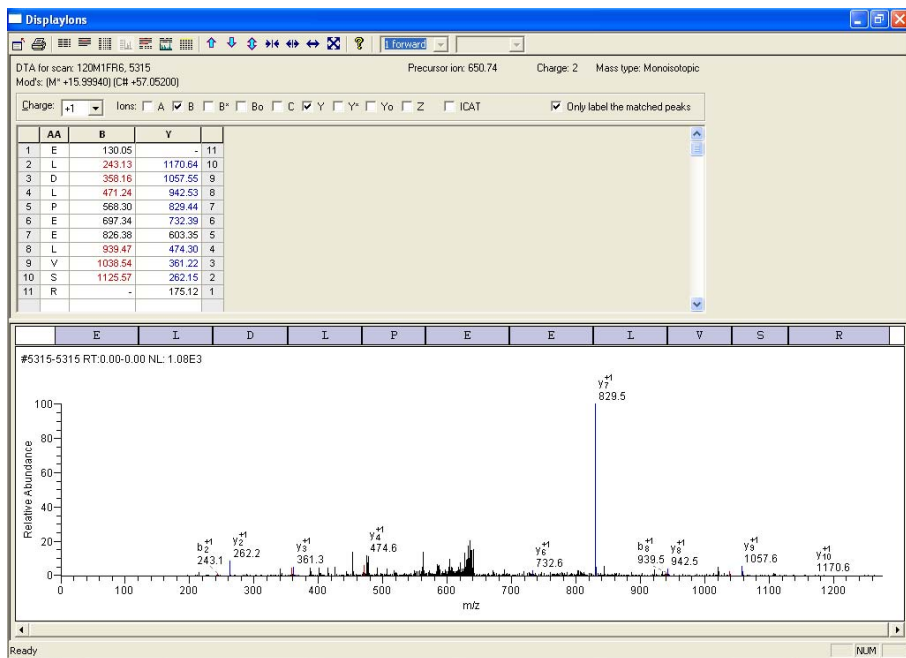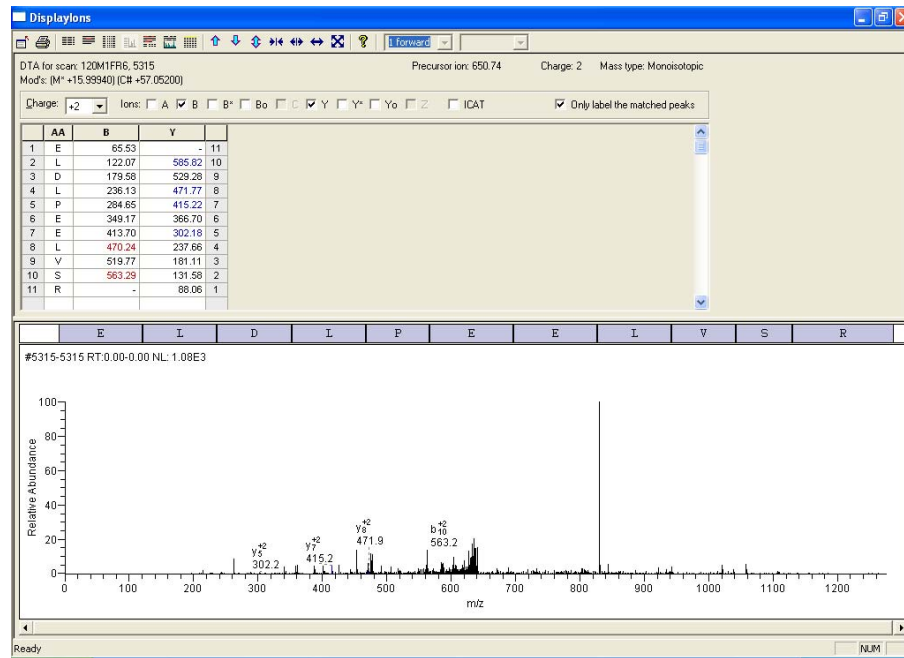

# RESVFTVEGGHRA

IPI00321718.4, IPI00651865.1

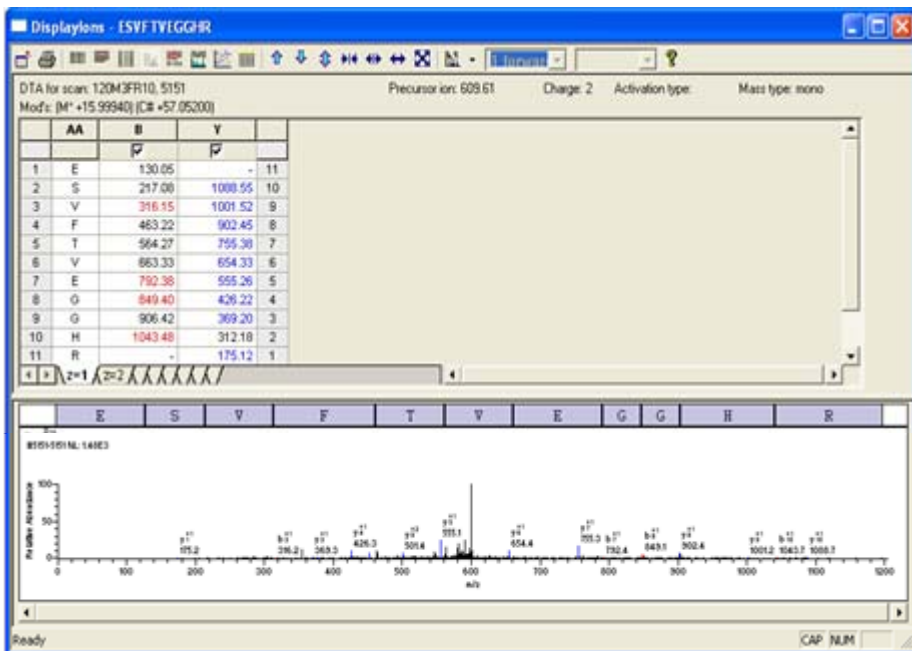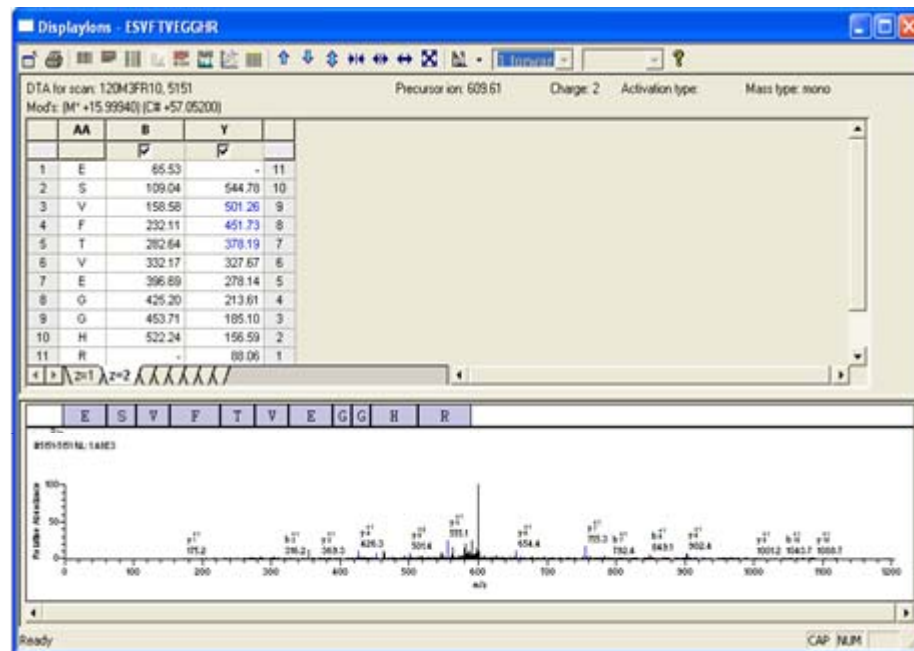

# RETVEEGEEIISLEKK IPI00130959.4

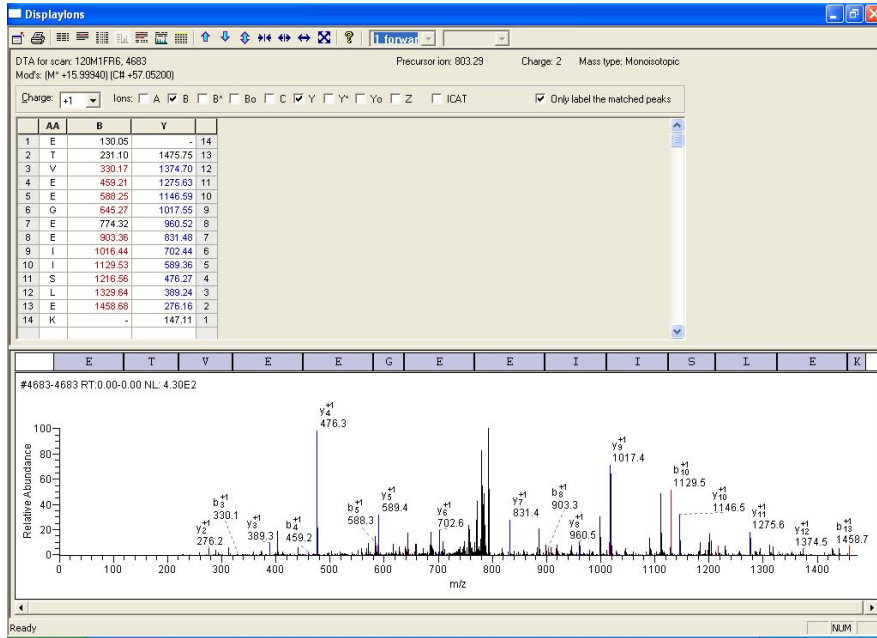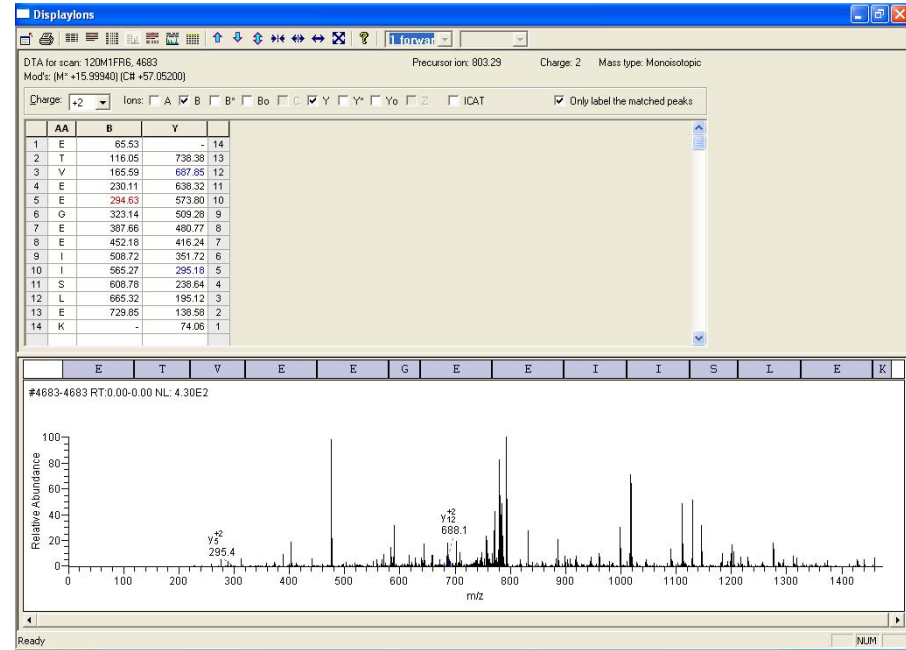

# REVSDGIVAPGYEEEALKI

## IPI00330303.6, IPI00758055.1

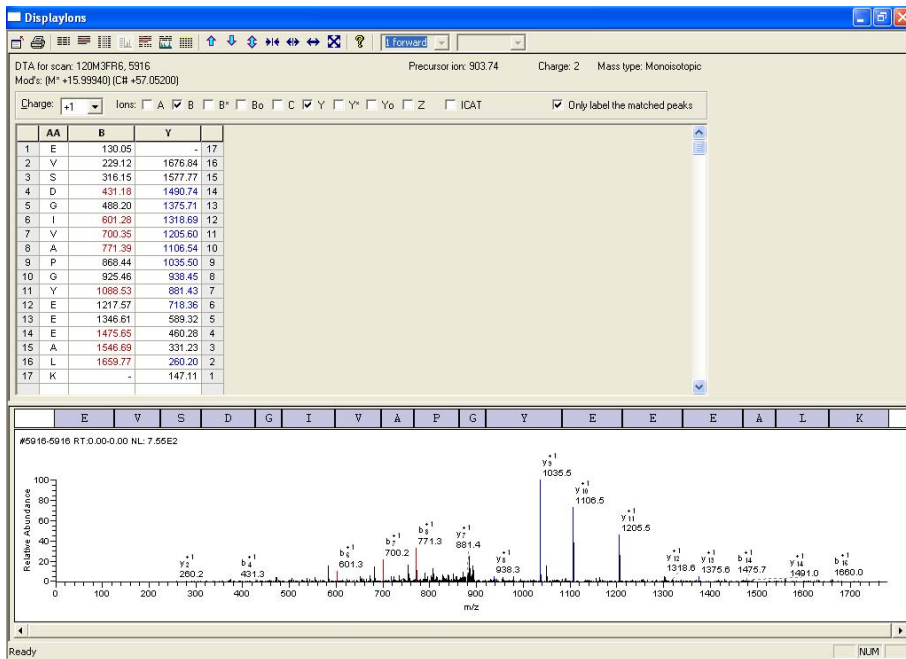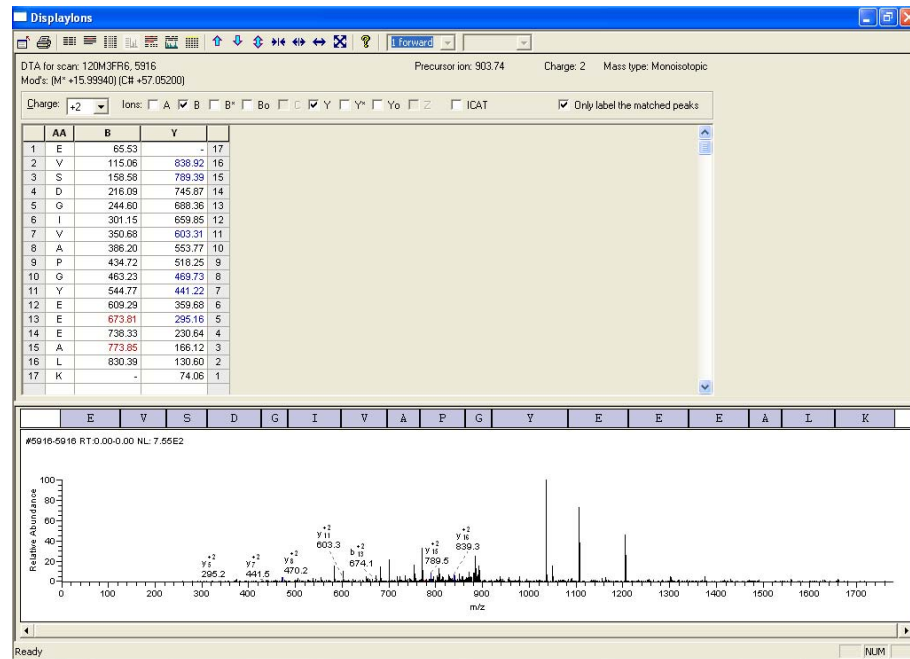

# RFGIVTSSAGTGTTEDTEAKK

## IPI00133801.2, IPI00658779.1

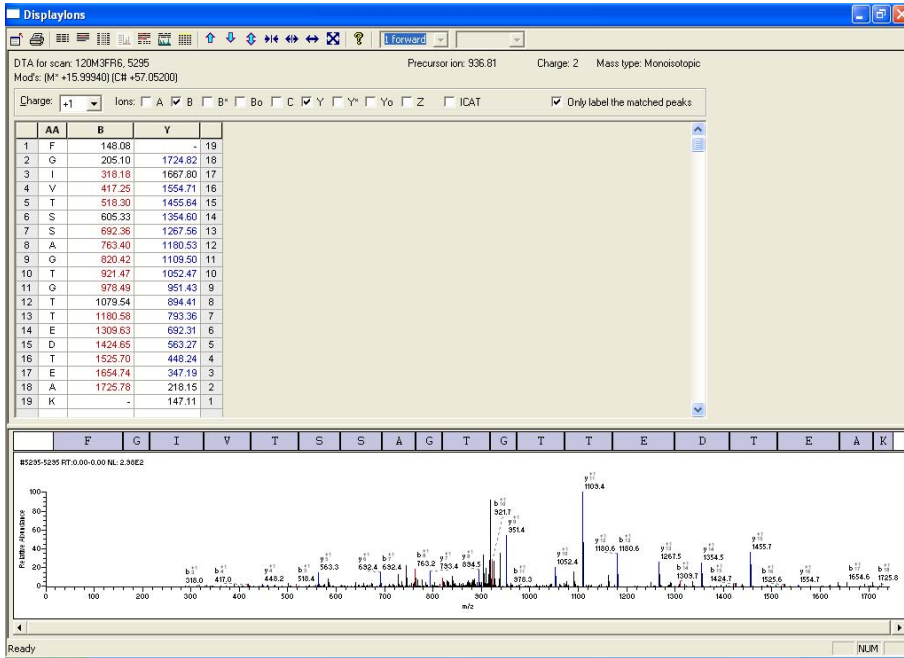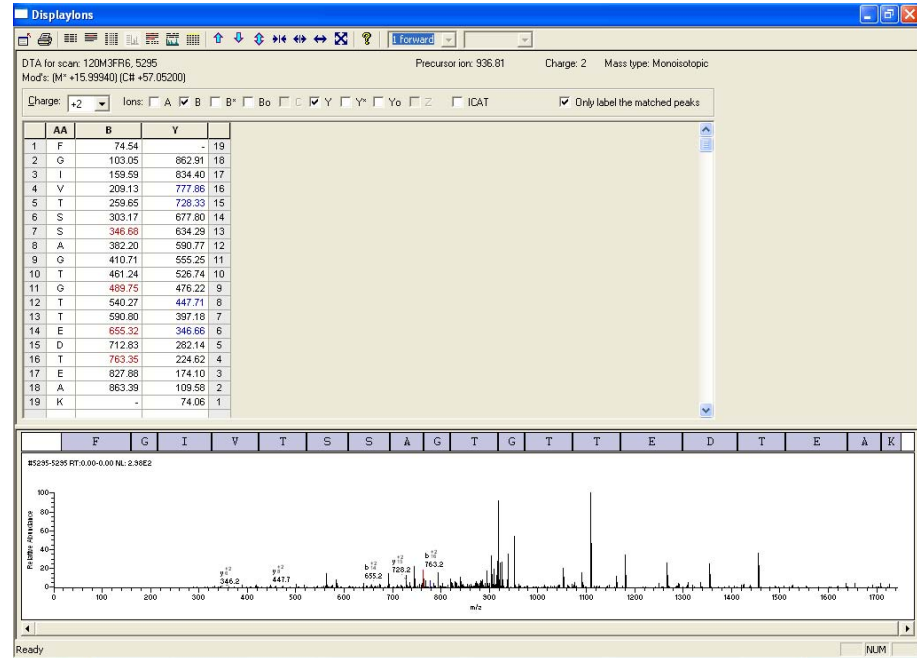

# RFGQGGAGPVGGQGPRG

IPI00129430.1, IPI00752791.1, IPI00754754.1, IPI00755611.1

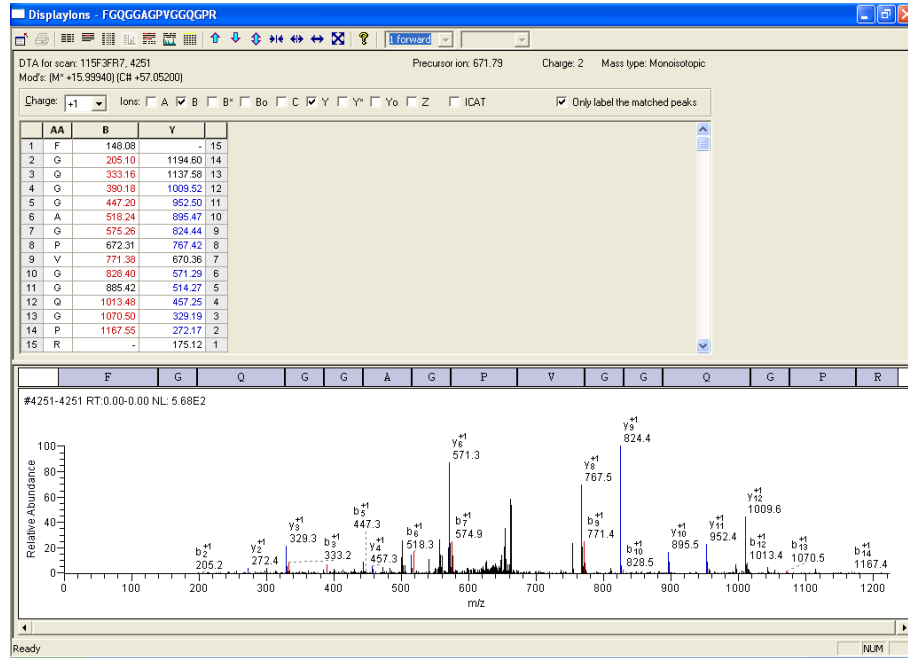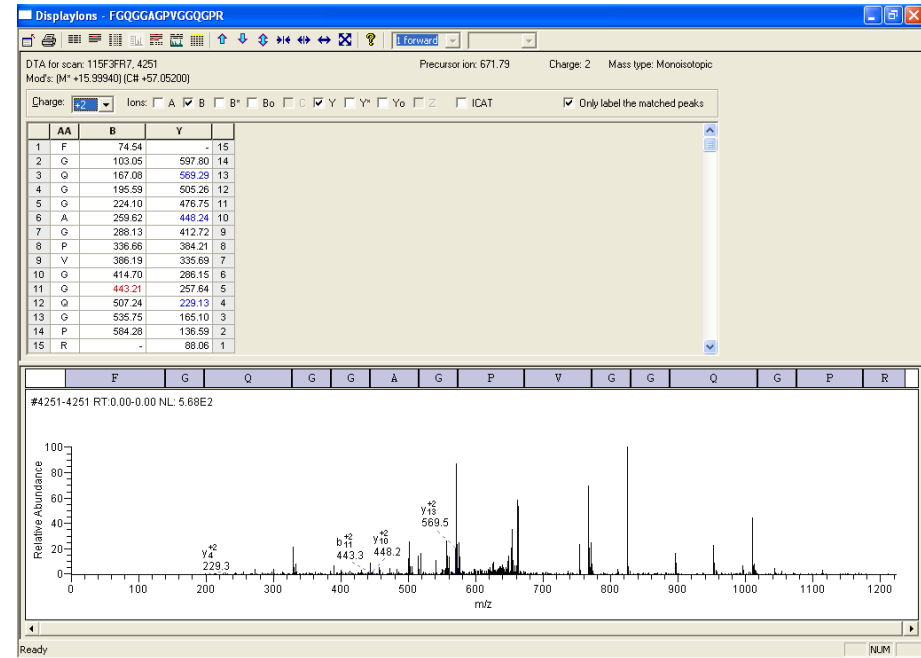

# RFHVEEEGKGKD

IPI00230002.6, IPI00555060.1, IPI00555069.1, IPI00753128.1

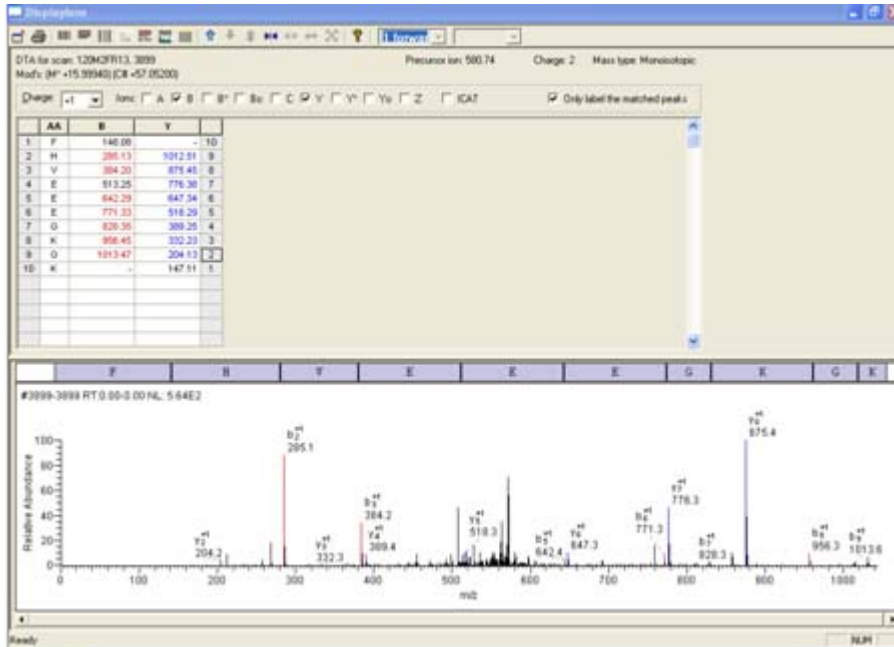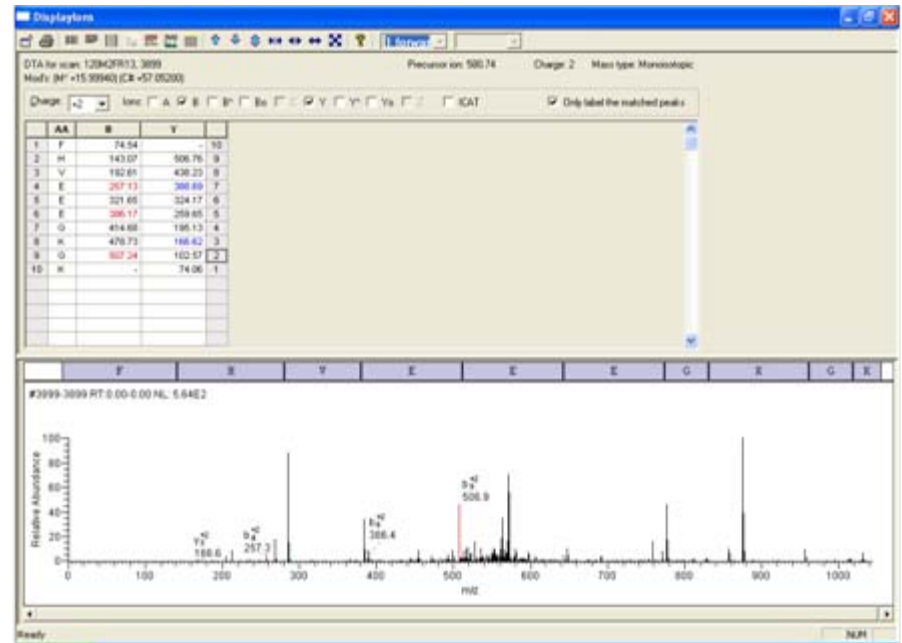

# RFLEQQNKVLQTKW IPI00625729.1

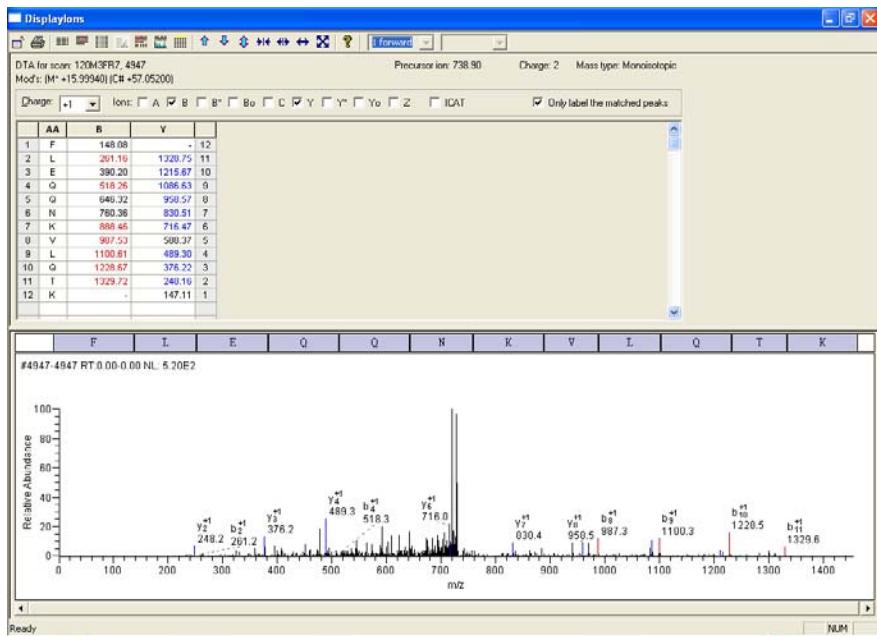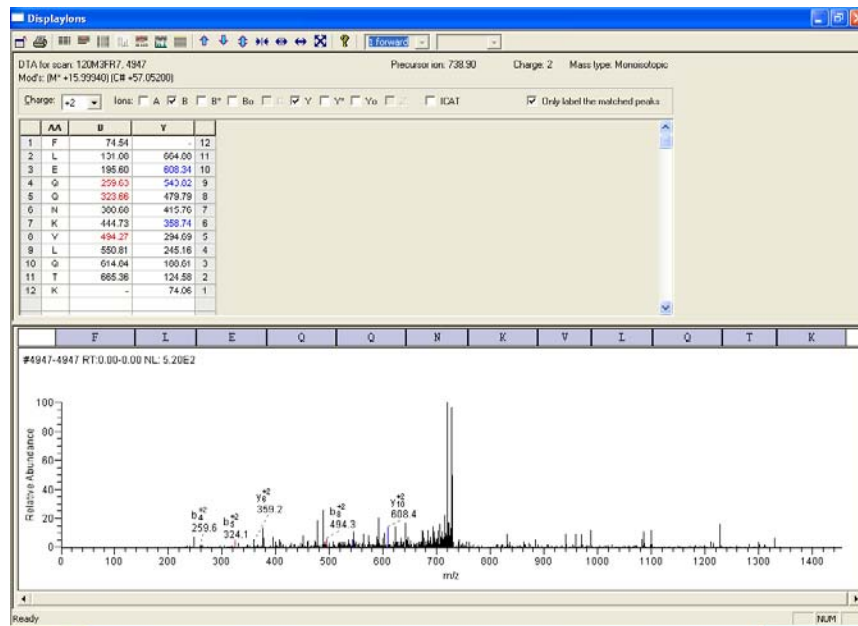



# RFPGQLNADLRK

IPI00109073.4, IPI00112251.1, IPI00122928.1, IPI00330805.1, IPI00338039.1,  
IPI00348094.4, IPI00662501.1, IPI00750573.1

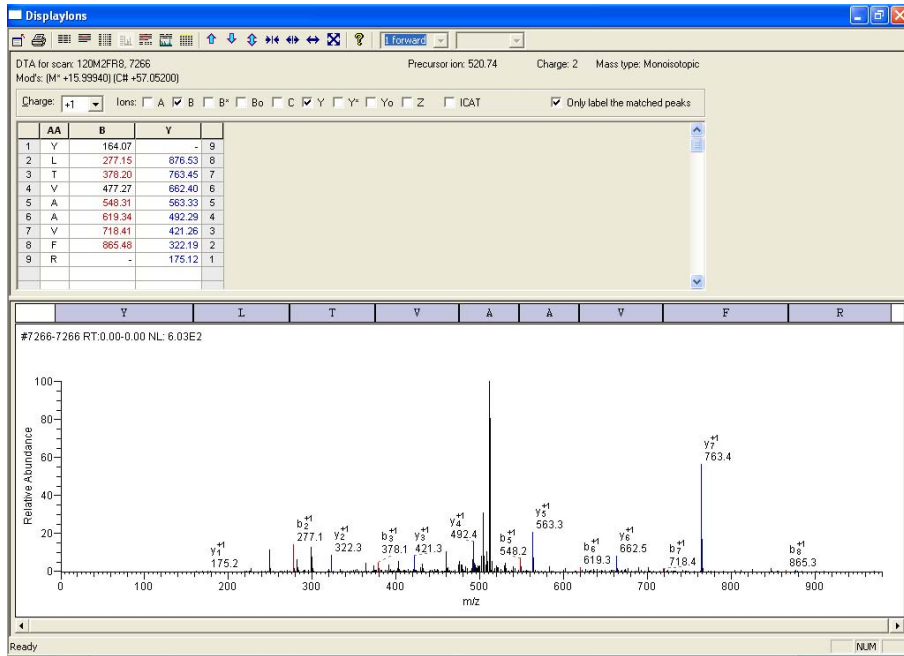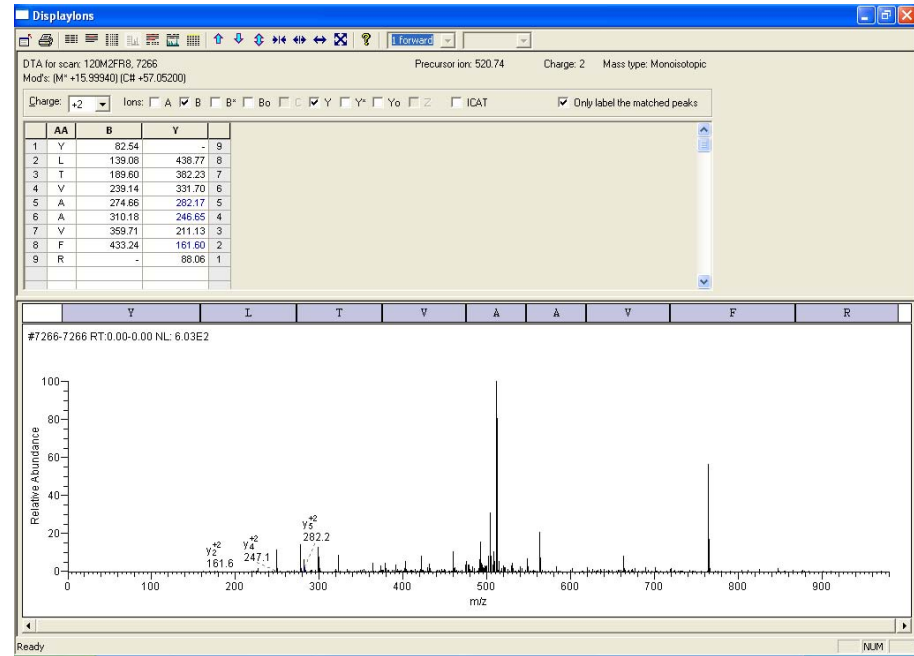

# RFTPQTFTNQIQAAFRE

IPI00111272.1, IPI00123604.2, IPI00126010.5, IPI00458034.4, IPI00553810.1,  
 IPI00622968.1, IPI00659629.1, IPI00672634.1, IPI00676858.1, IPI00677305.1,  
 IPI00753827.1

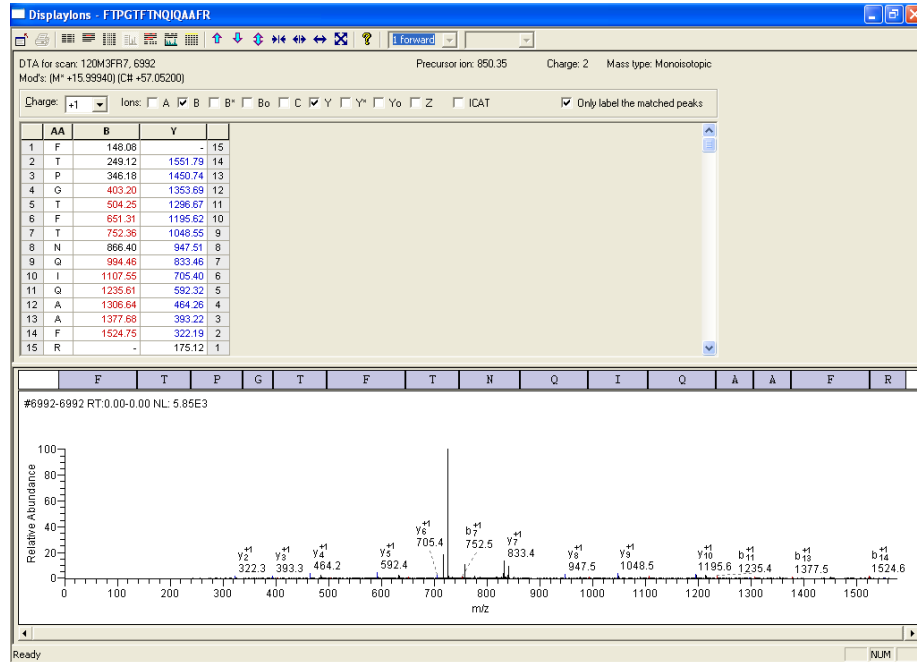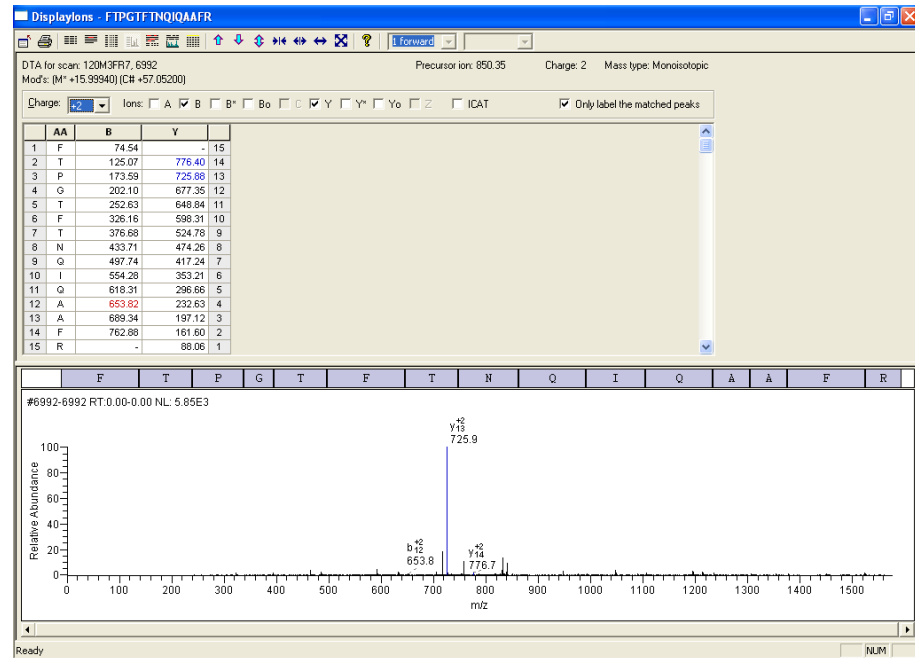

# RGAAQNIIPASTGAAKA

IPI00123176.1, IPI00135284.1, IPI00229201.3, IPI00271869.1, IPI00273646.8,  
 IPI00319731.1, IPI00462008.4, IPI00462075.4, IPI00620663.2, IPI00622795.2,  
 IPI00622980.3, IPI00625893.3, IPI00663957.1, IPI00752289.2, IPI00752685.2,  
 IPI00756025.1, IPI00761174.1, IPI00762304.1

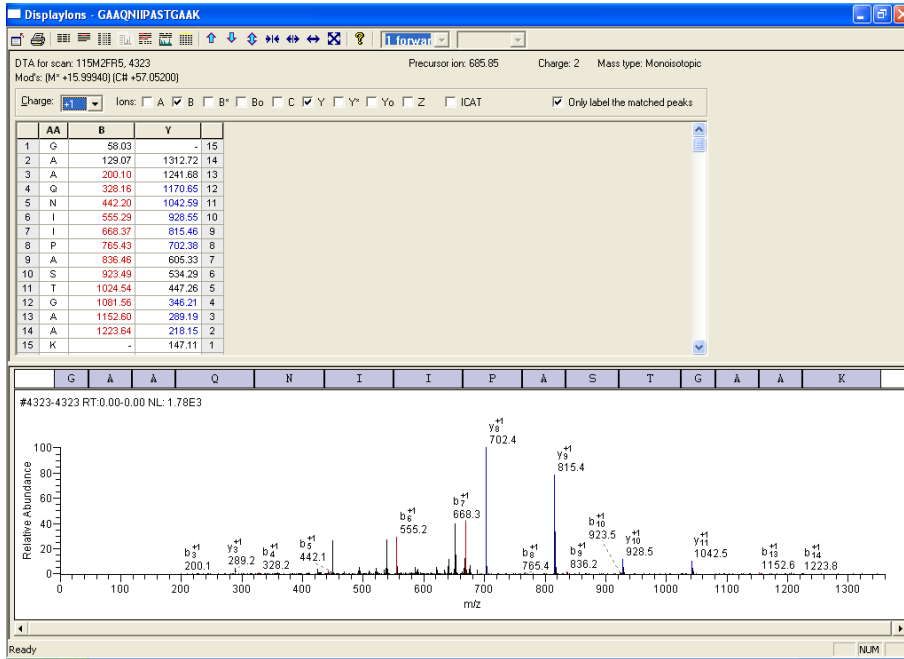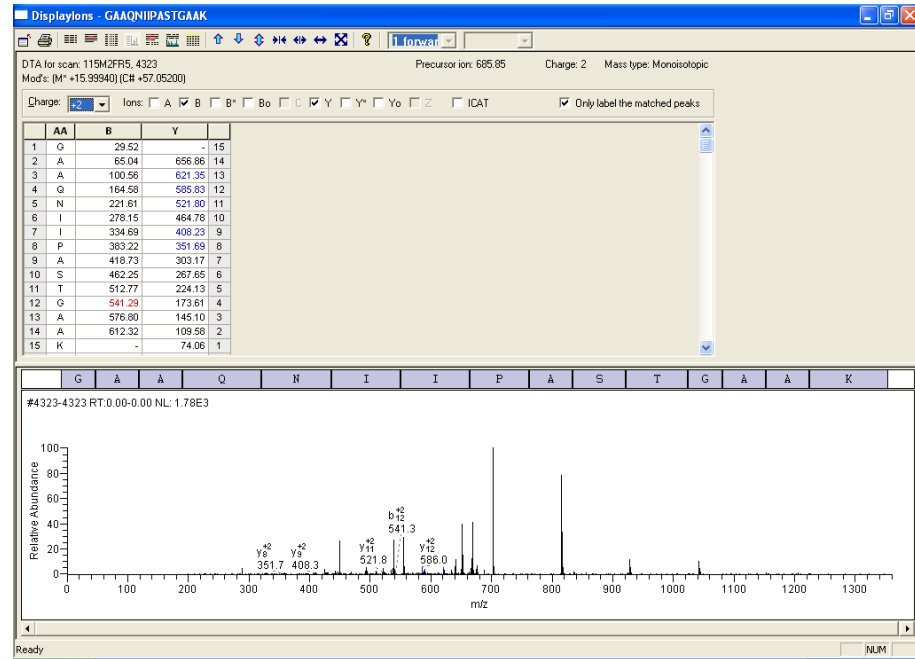

# RGDEELDSLIIKA

IPI00320149.2, IPI00331734.4, IPI00555055.3, IPI00651852.1, IPI00654026.1,  
IPI00750135.1

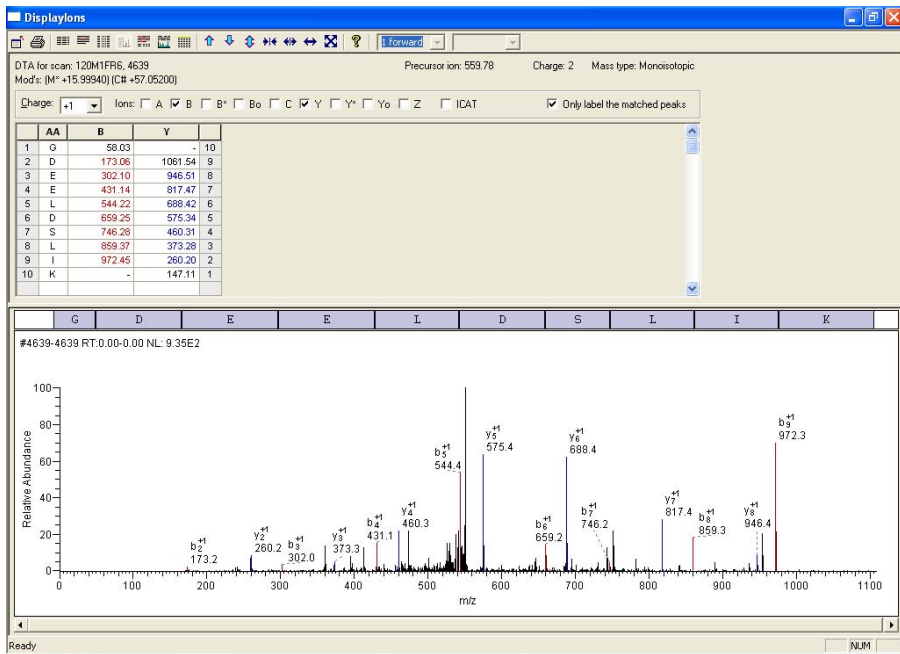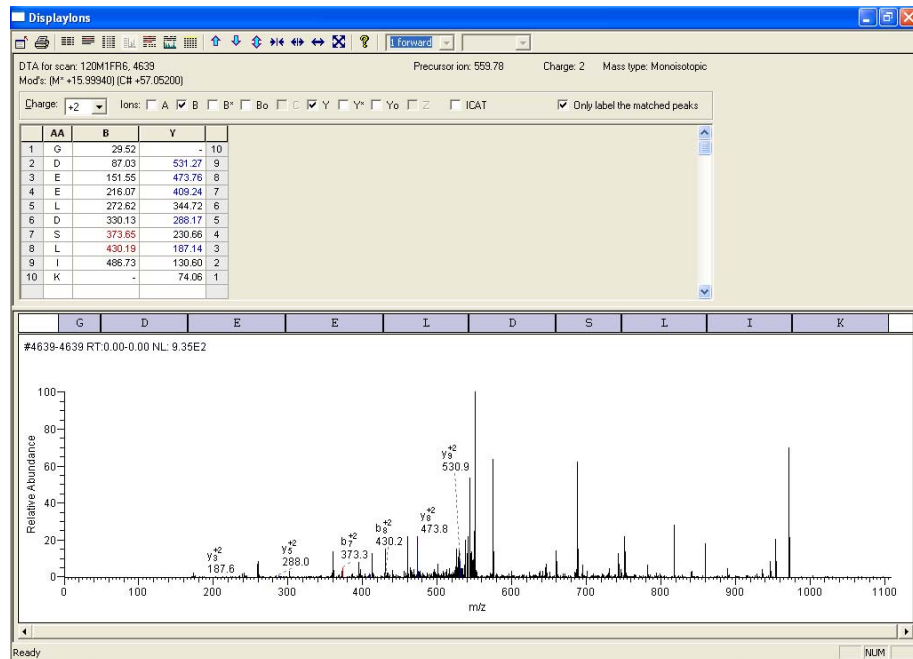

# RGDLGIEIPAEEKV IPI00133605.1

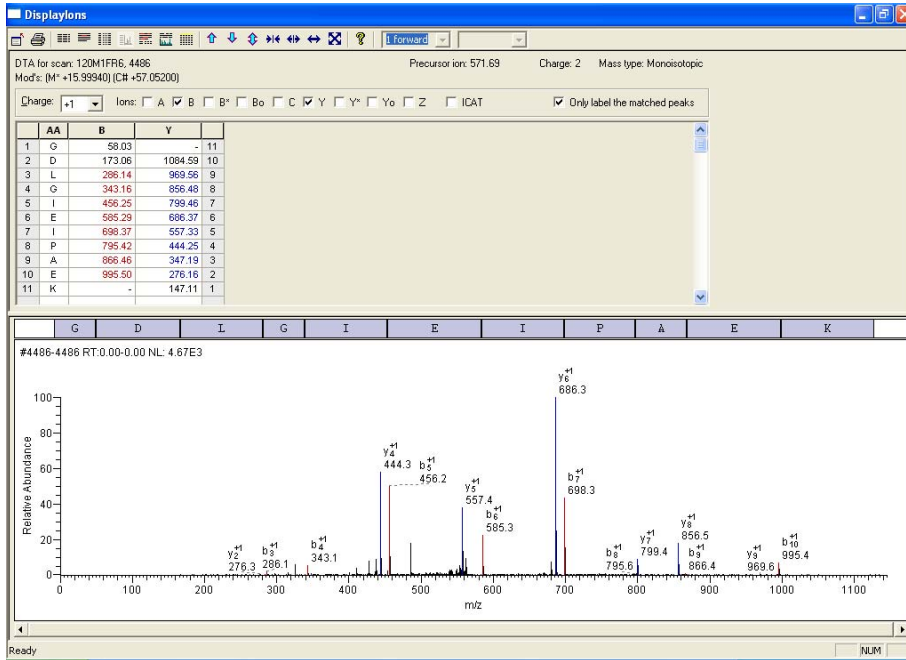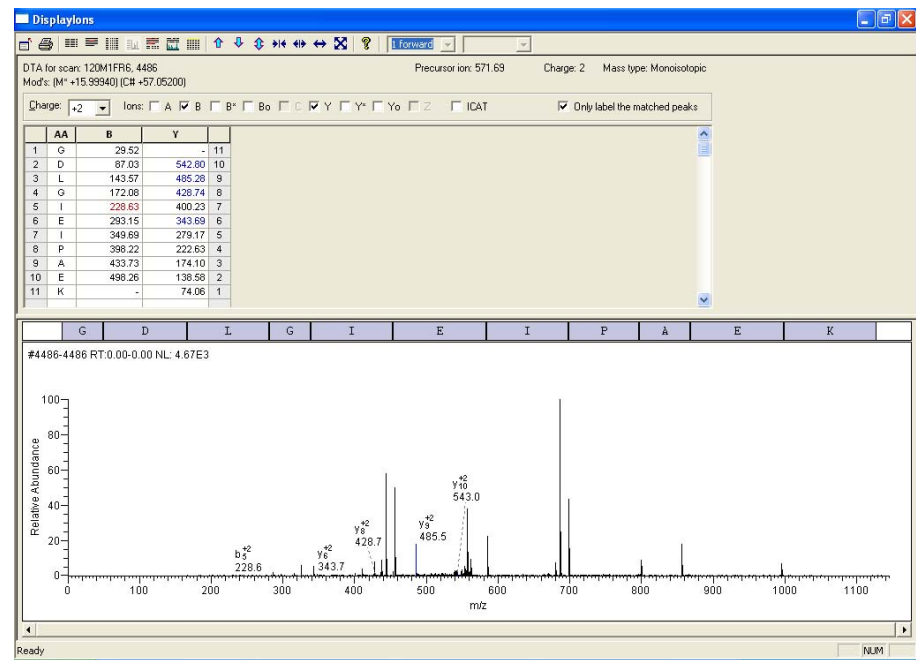

# RGLMGNIIELYEVAGIKG

## IPI00128776.1, IPI00753245.1

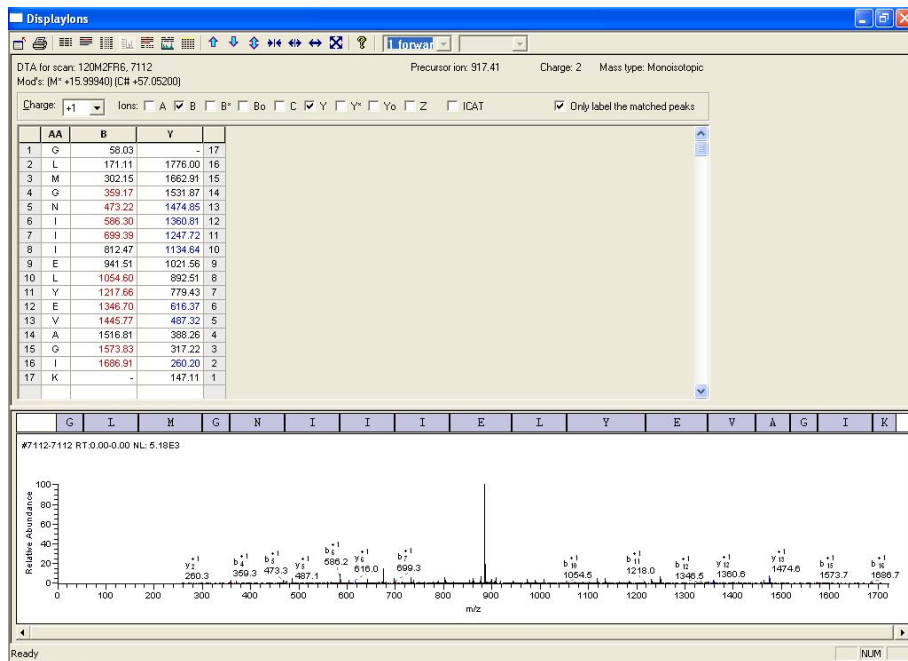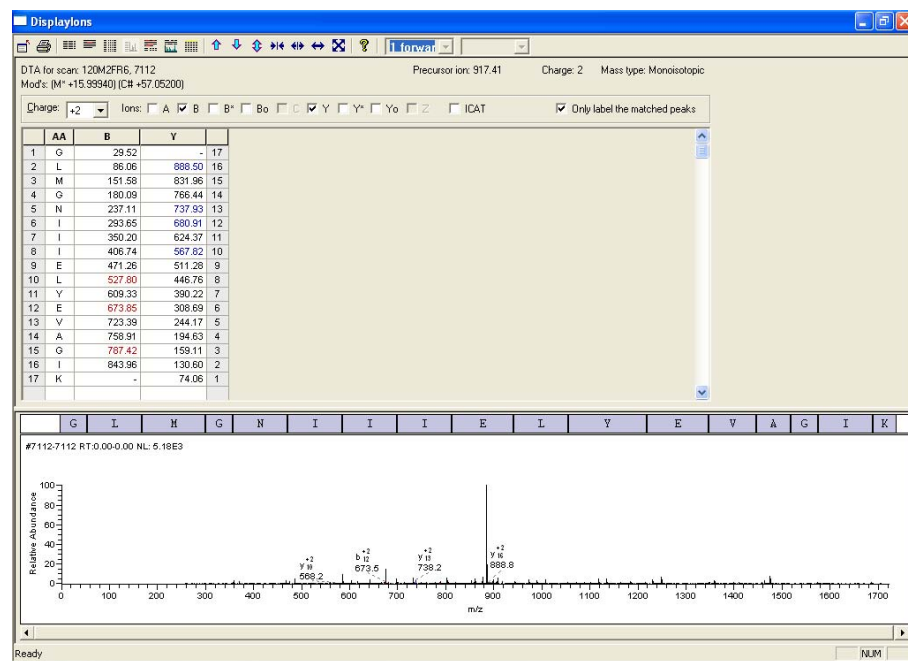

# RGYISPYFINTSKG

## IPI00308885.5, IPI00350780.6, IPI00461249.1

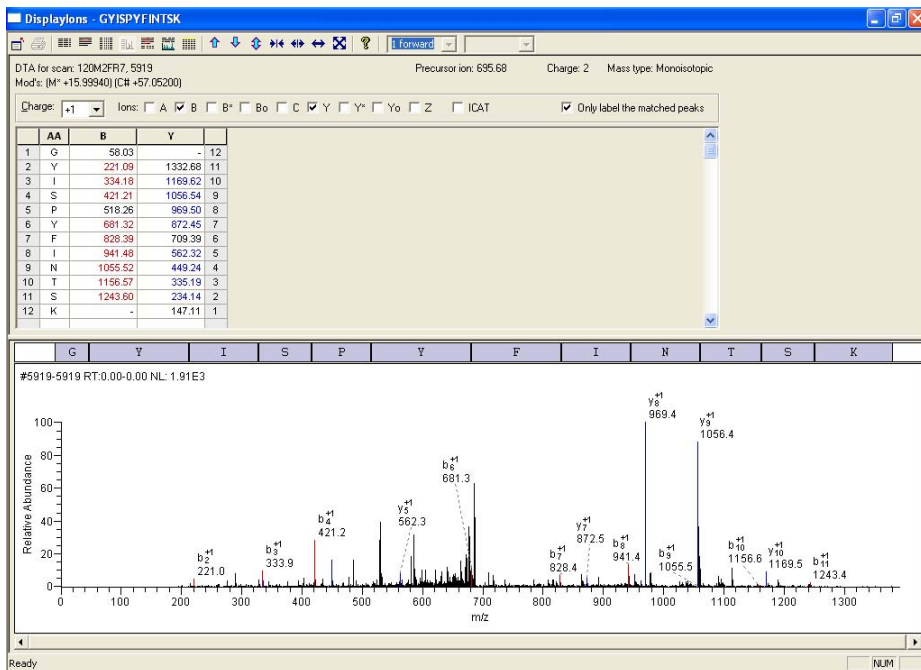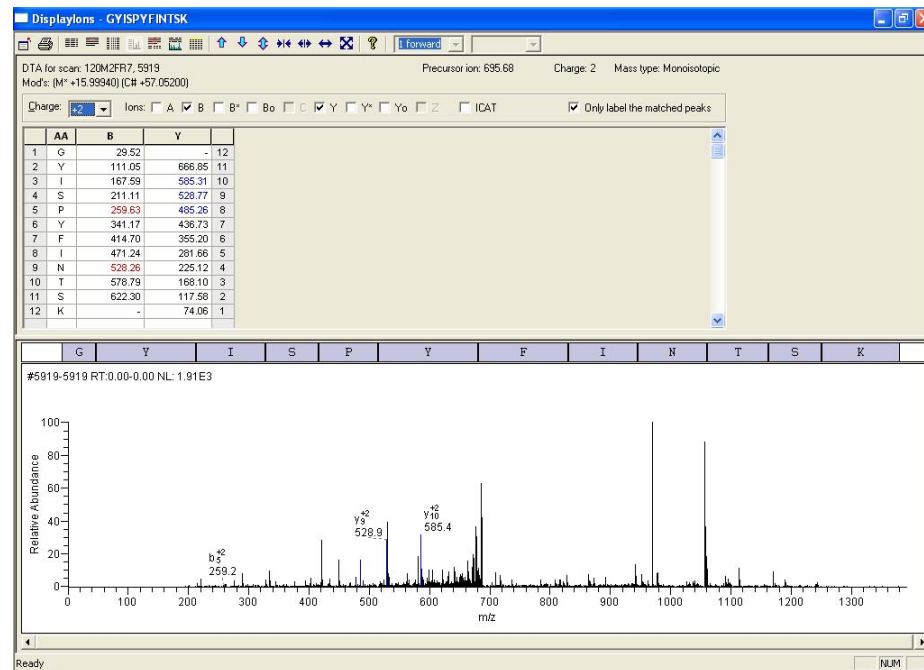

# RGYSFTTTAERE

IPI00110850.1, IPI00110851.1, IPI00136929.1, IPI00473320.2, IPI00605347.3,  
IPI00648420.1, IPI00652436.2, IPI00655102.1, IPI00751076.1

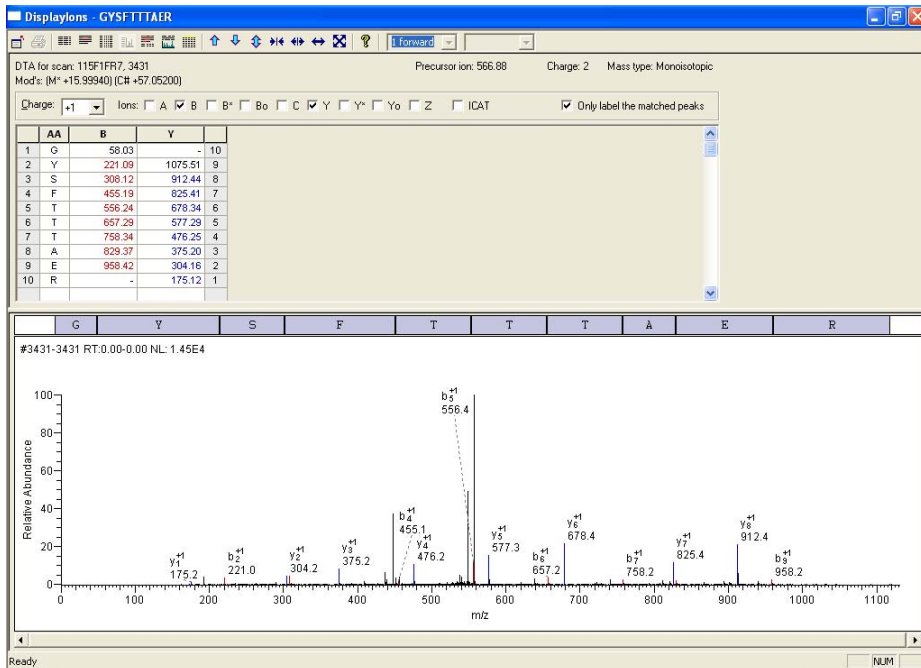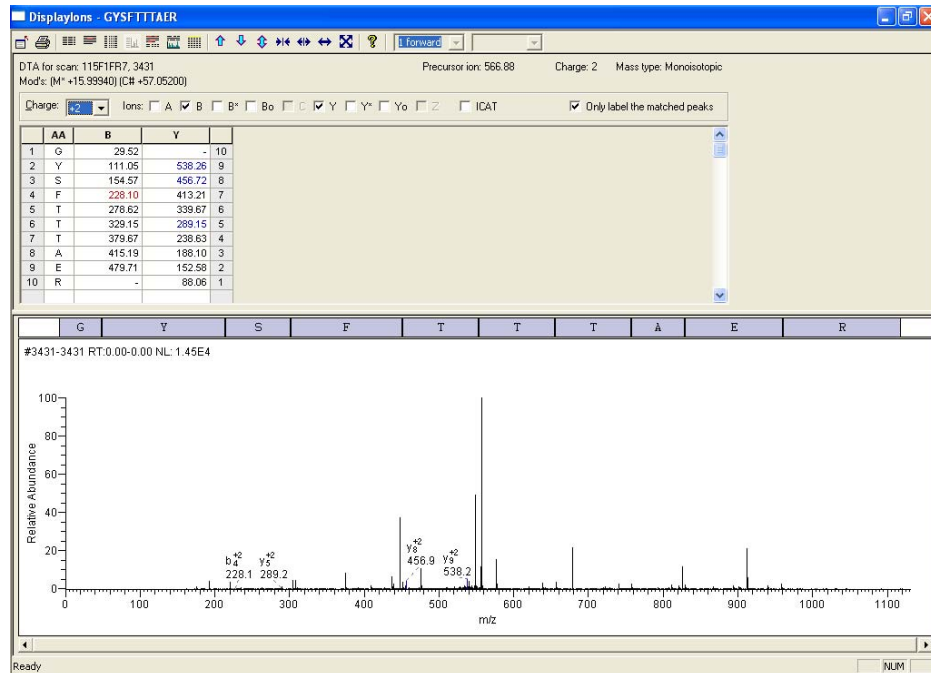



# RHDGYGSHGPLLPLPSRY IPI00121760.3

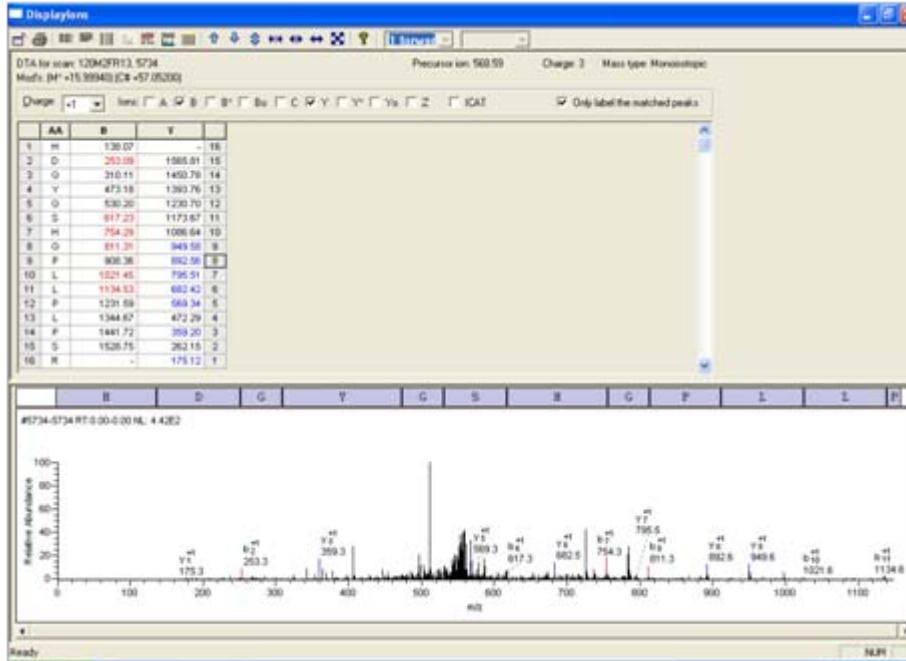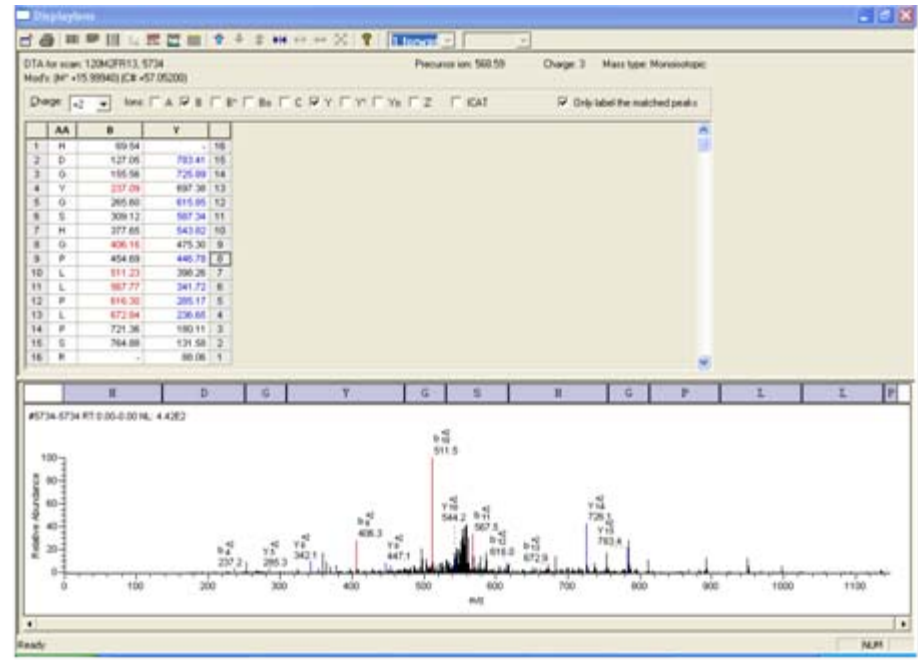

RHDGYGSHGPLLPLPSRY  
IPI00121760.3

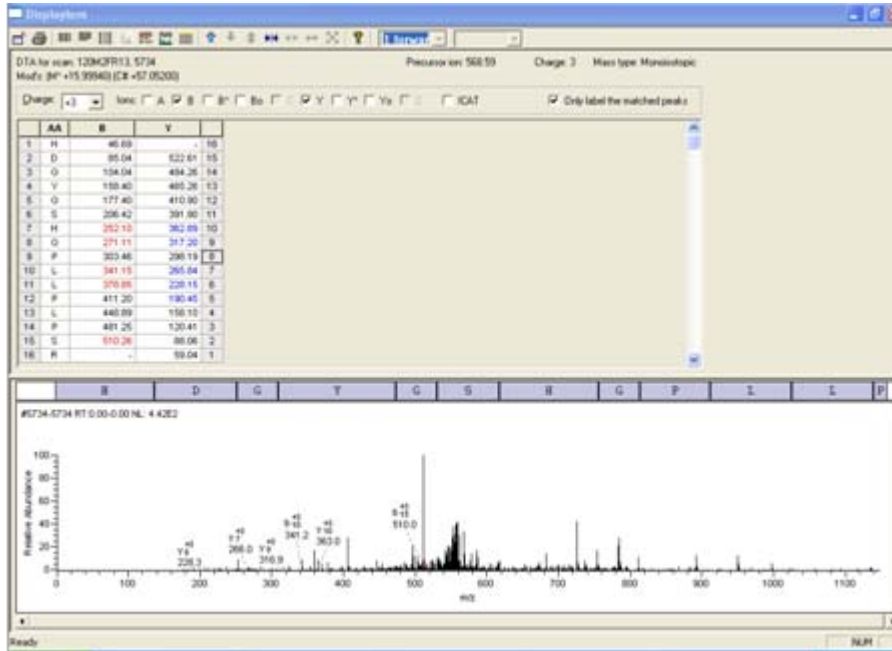

# RHGFEAASIKEERG

IPI00338604.4, IPI00515398.1, IPI00626176.3, IPI00753480.1, IPI00757312.1

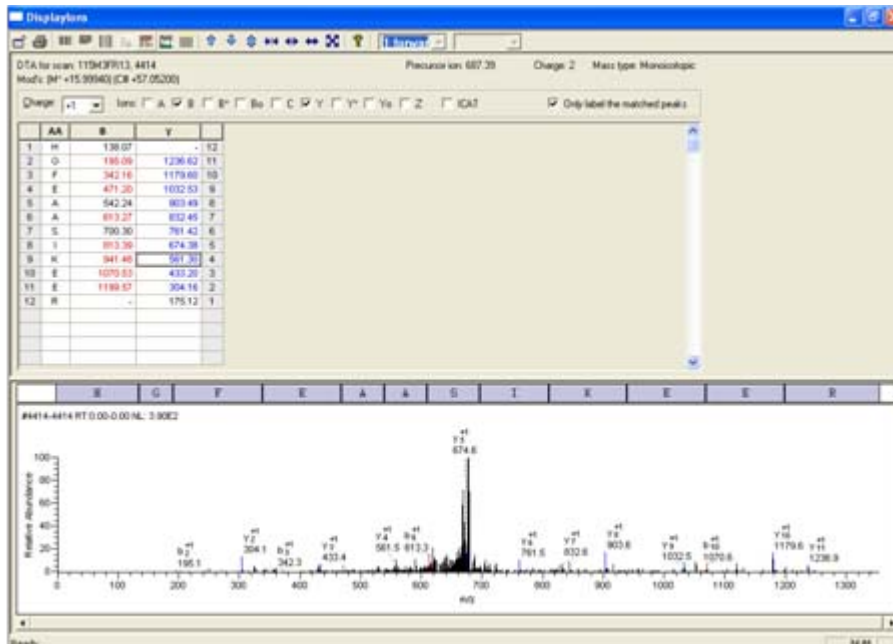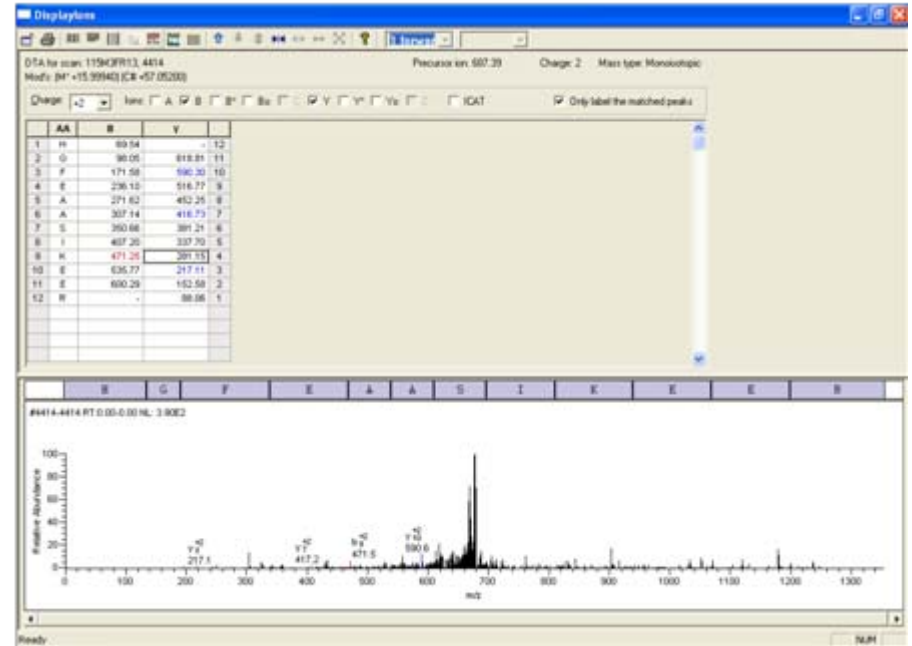

# RHVFVGGDDFKS IPI00119886.1

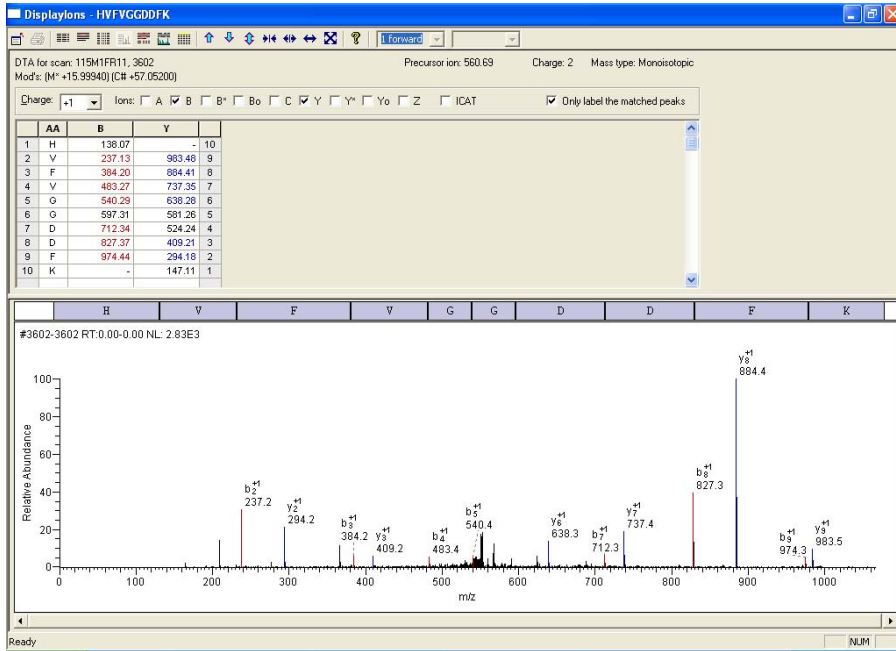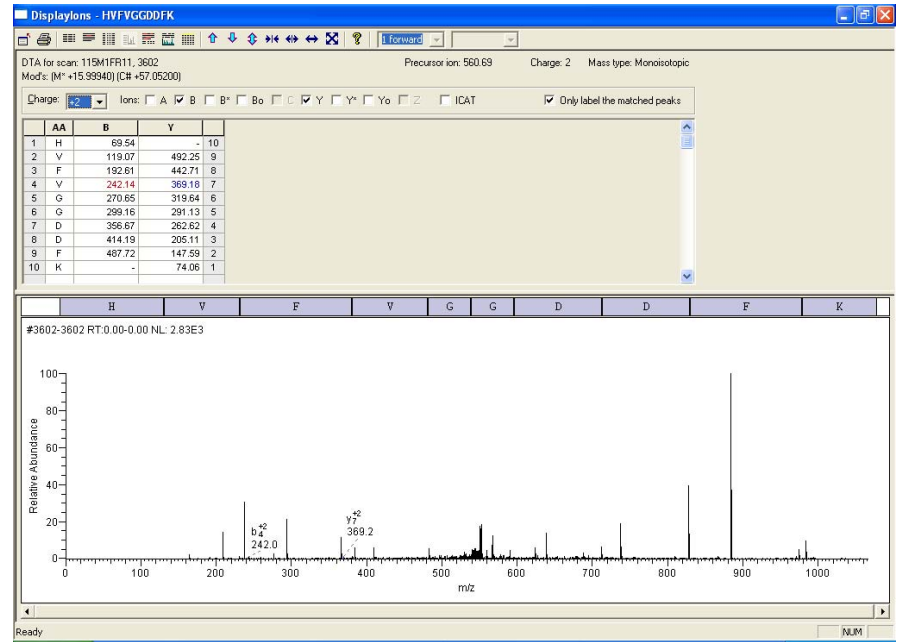

# RIANLQTDLSDGLRL

IPI00131138.9, IPI00387373.4, IPI00658666.1, IPI00664643.1, IPI00664721.2,  
IPI00675701.1

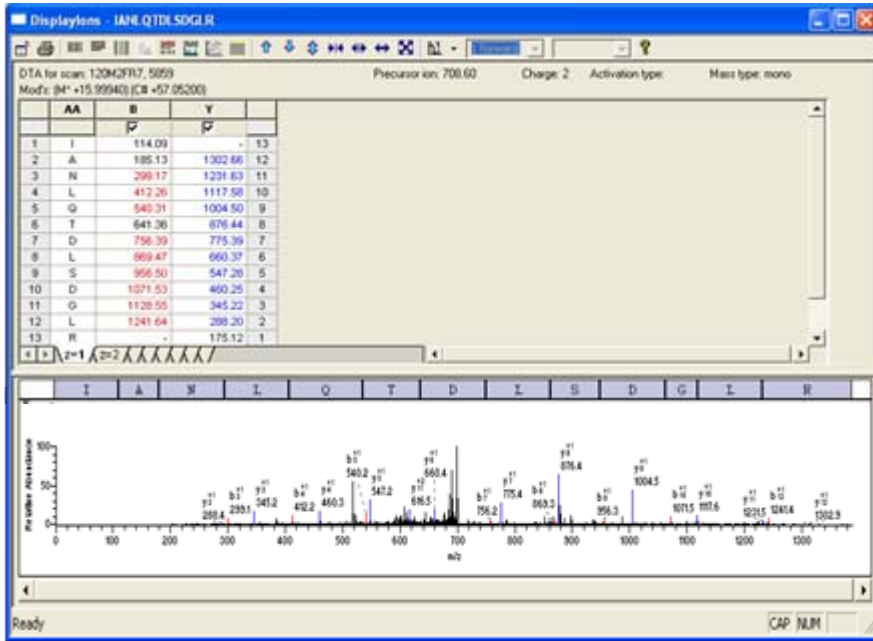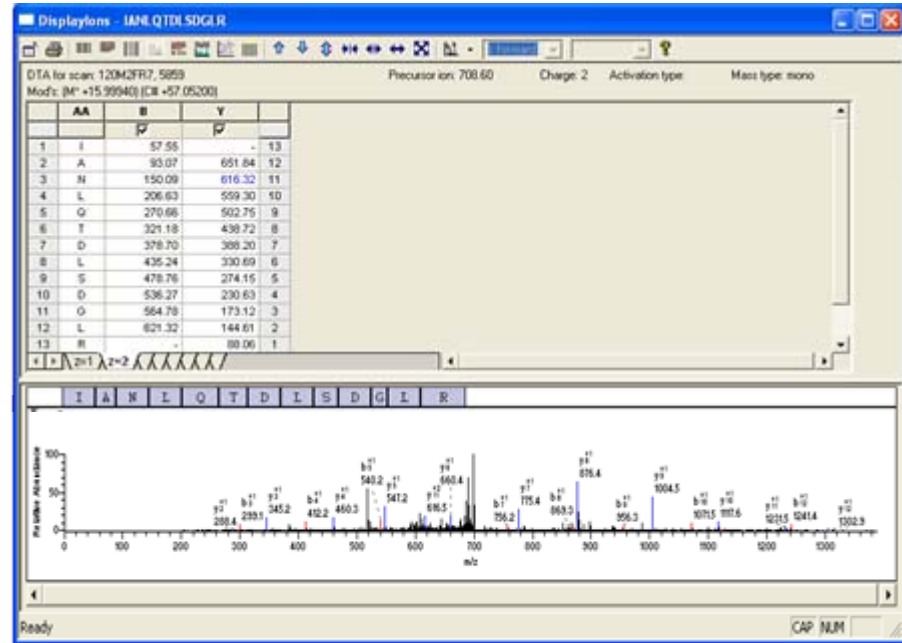

# RIAQSDYIPTQQDVLRT

## IPI00228617.5, IPI00652902.1, IPI00755585.1

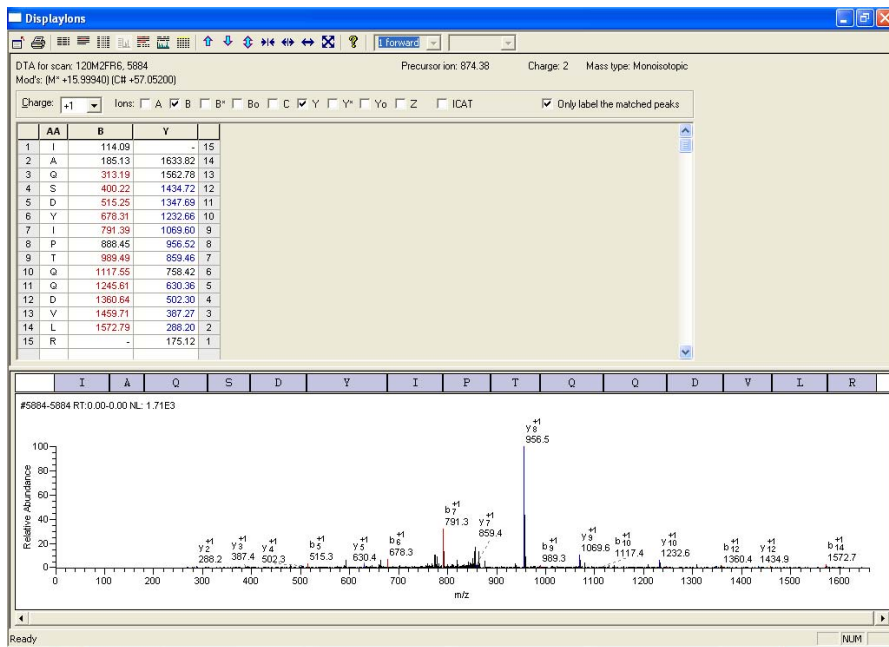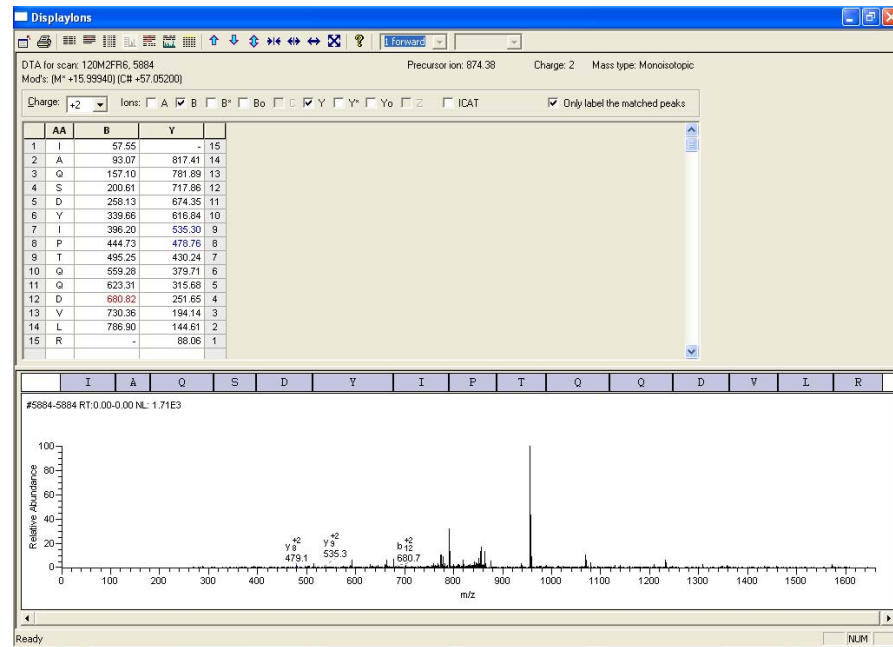

# RIEDVTPIPSDSTRR

## IPI00112407.3, IPI00322562.4, IPI00663582.1

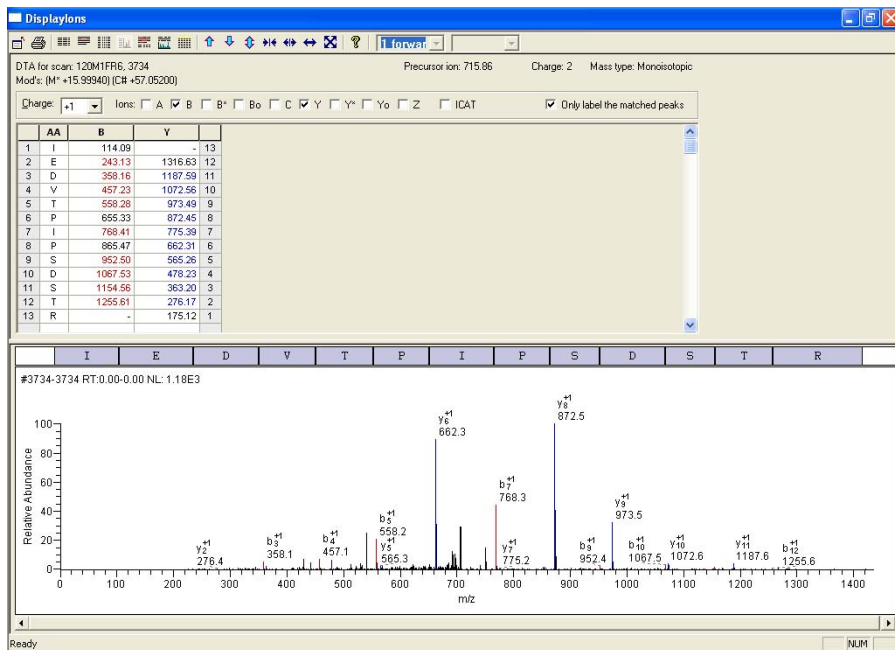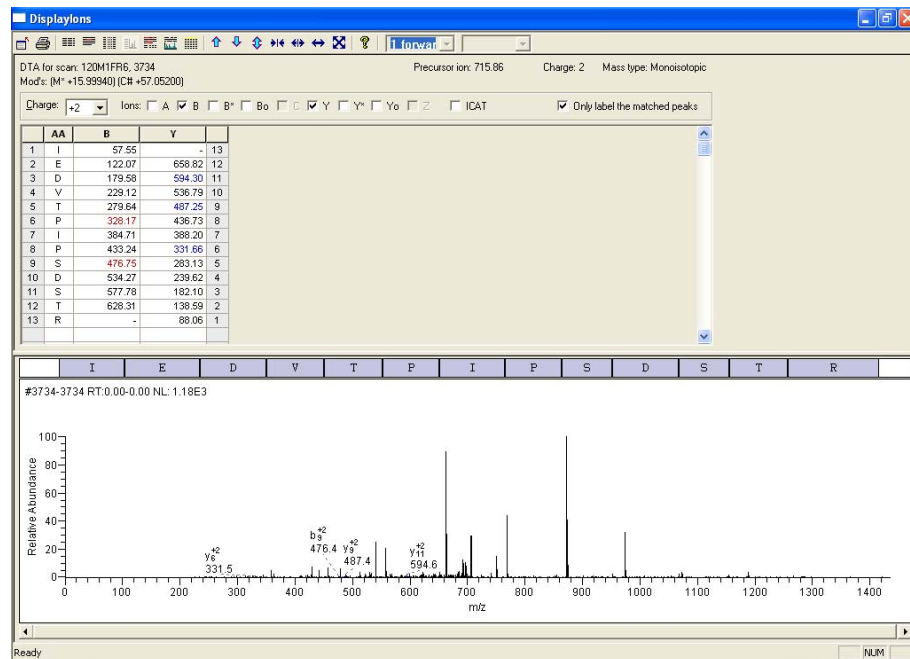

# RIIDVVYNASNELVRT

IPI00274175.1, IPI00466820.3, IPI00475203.1, IPI00621229.1, IPI00627028.3,  
IPI00671398.1, IPI00756488.1, IPI00756959.1

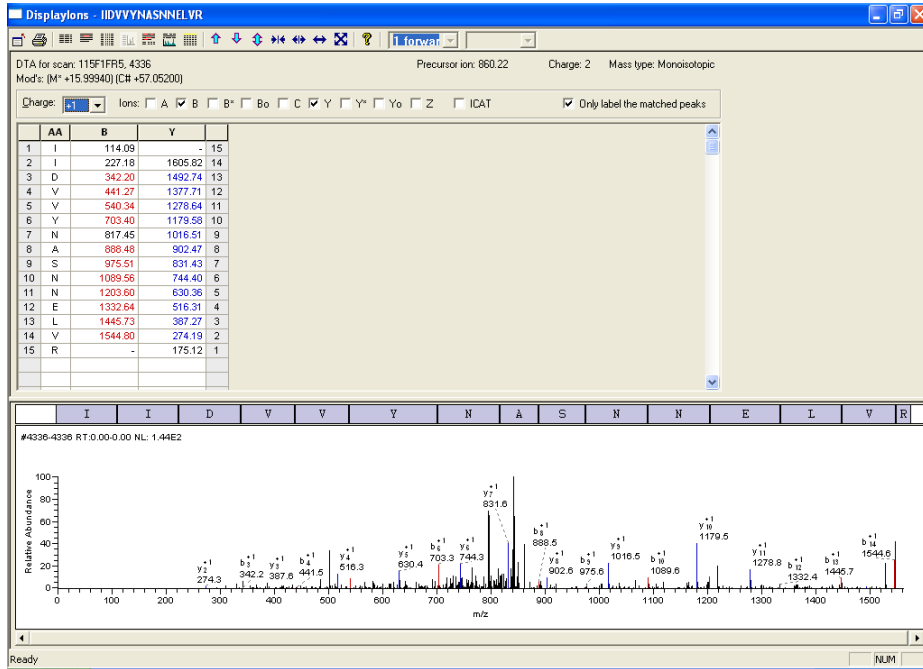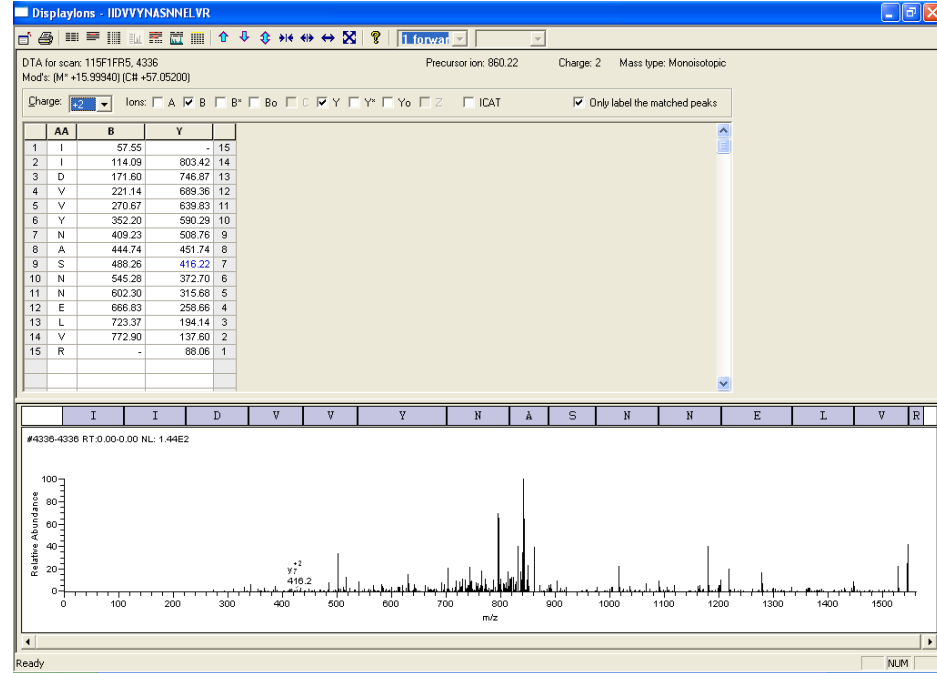



# RIITLAGPTNAIFKA

IPI00127707.1, IPI00221796.1, IPI00221799.1, IPI00608111.1

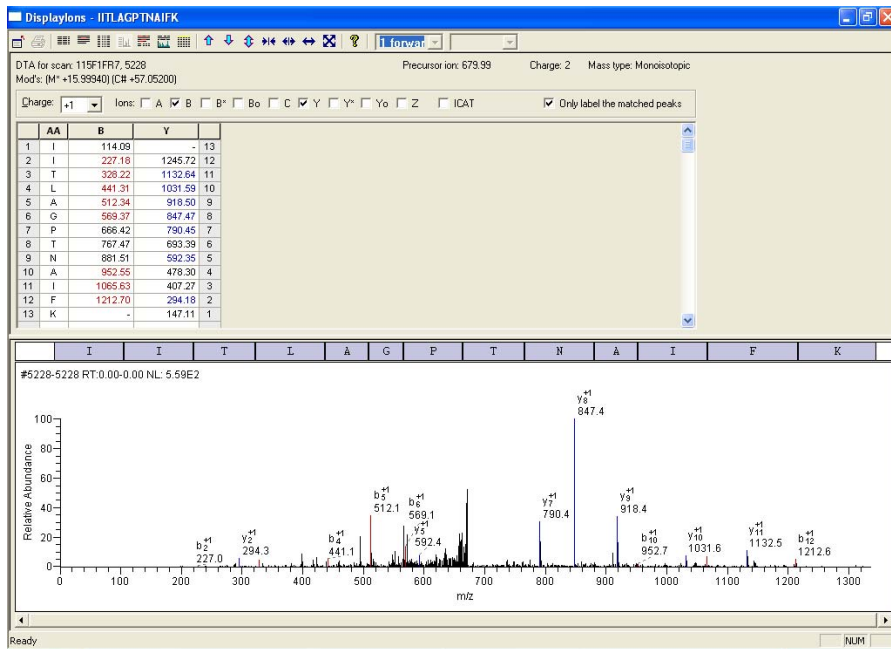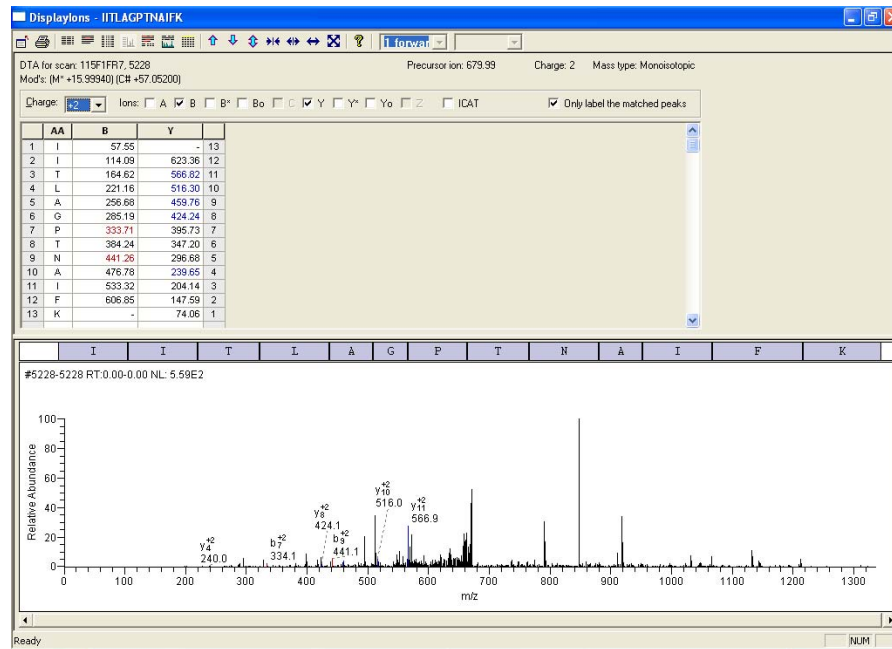

# RIITLTGPTNAIFKA

## IPI00128904.1

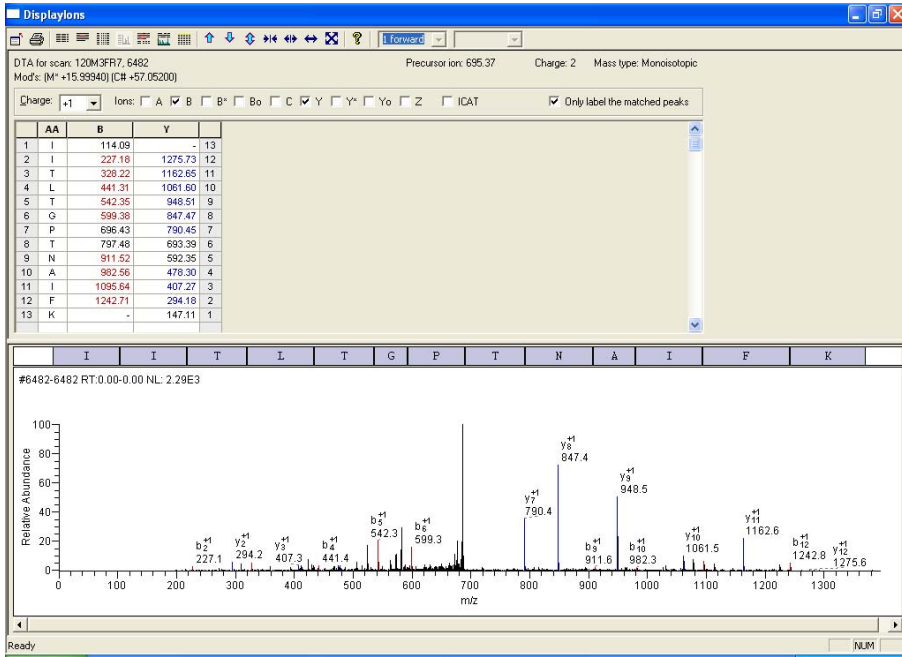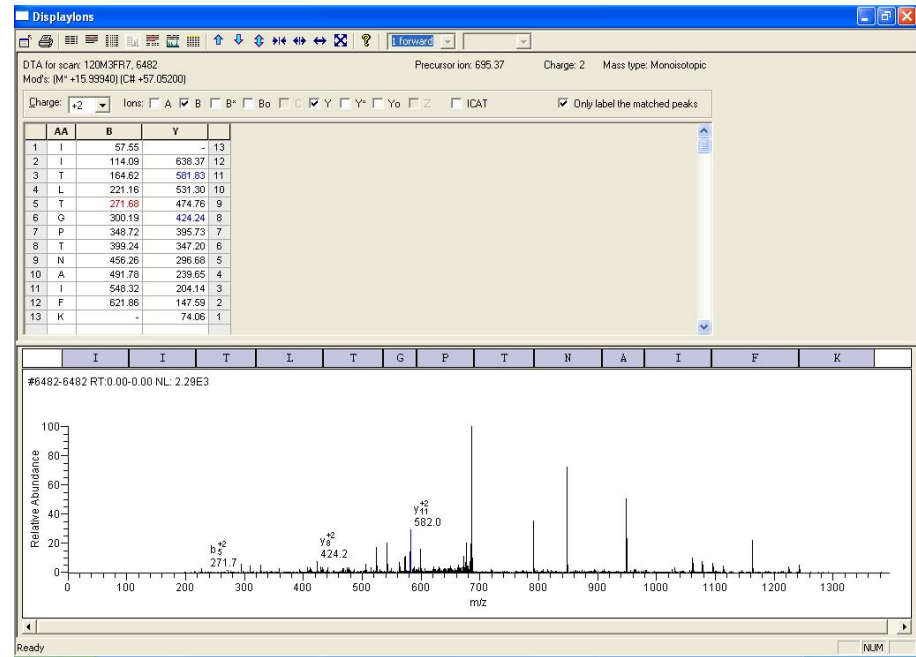

# RILAQATSDLVNAIKA

IPI00465786.3, IPI00648677.1, IPI00648794.1

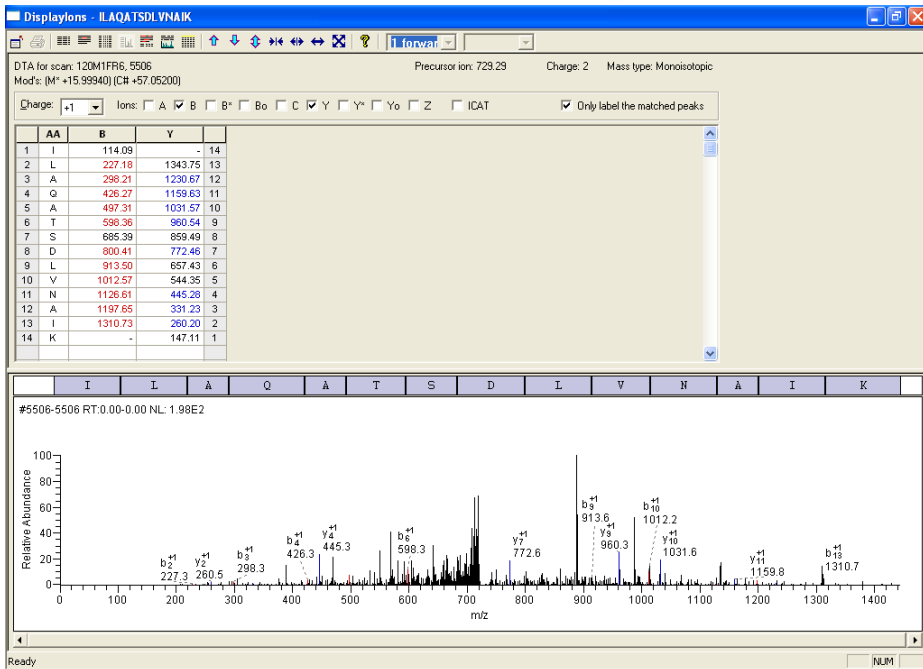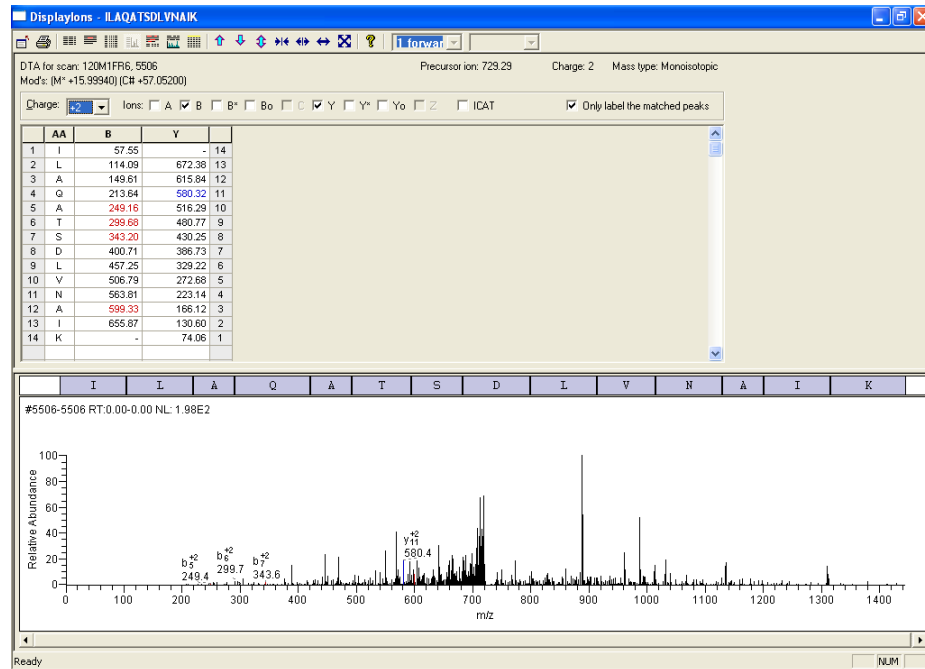

# RINPDGSQSVVEVPYARS

## IPI00135512.1

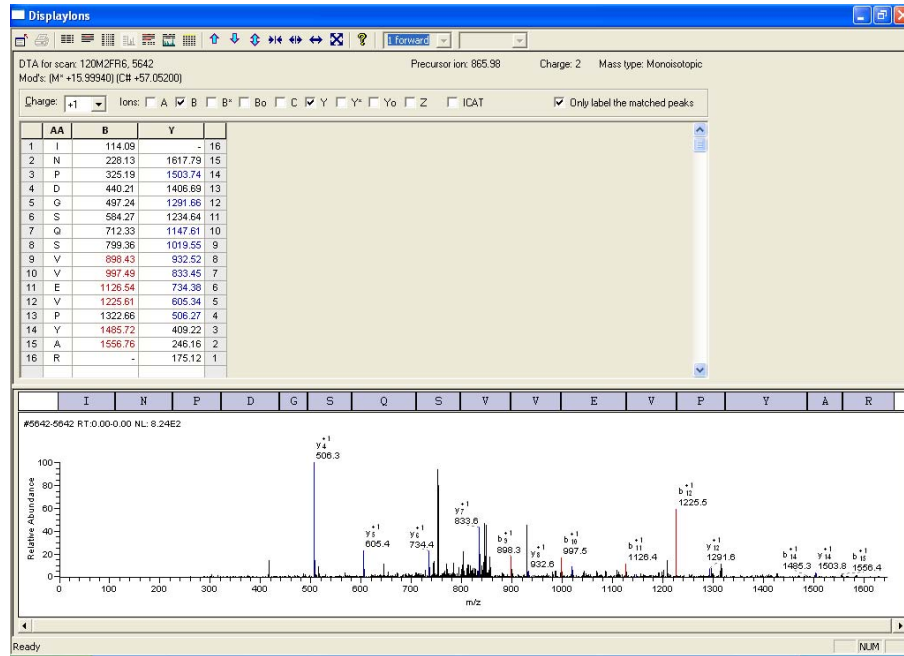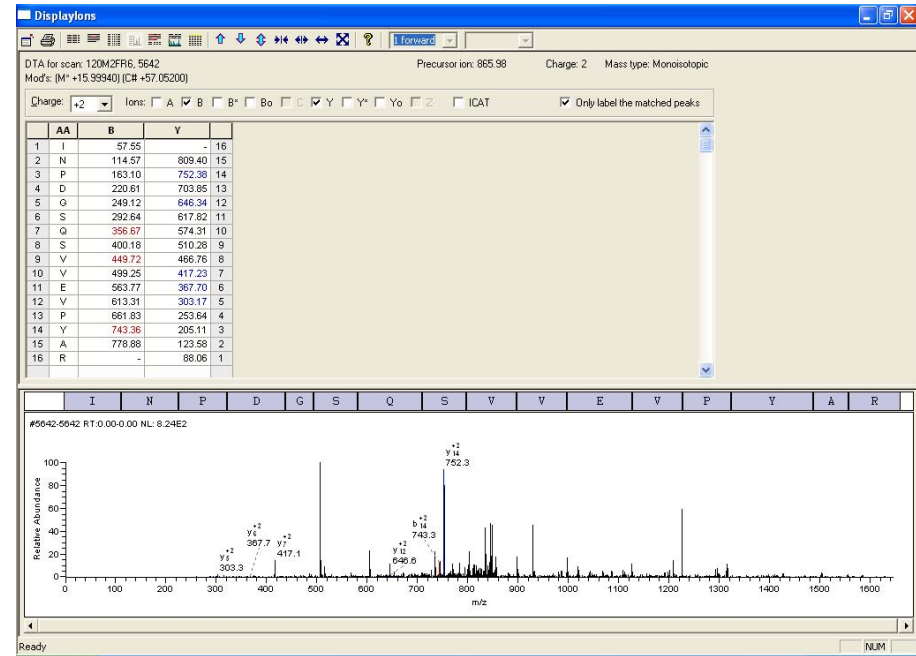

# RIQLVEEELDRA

IPI00169707.1, IPI00230044.4, IPI00278611.5, IPI00459570.1, IPI00474756.1

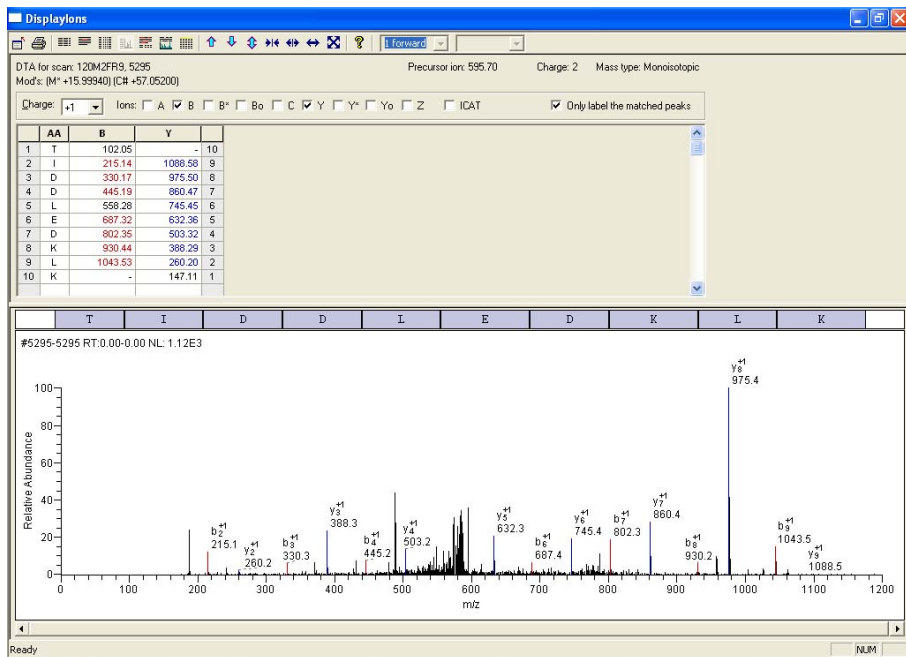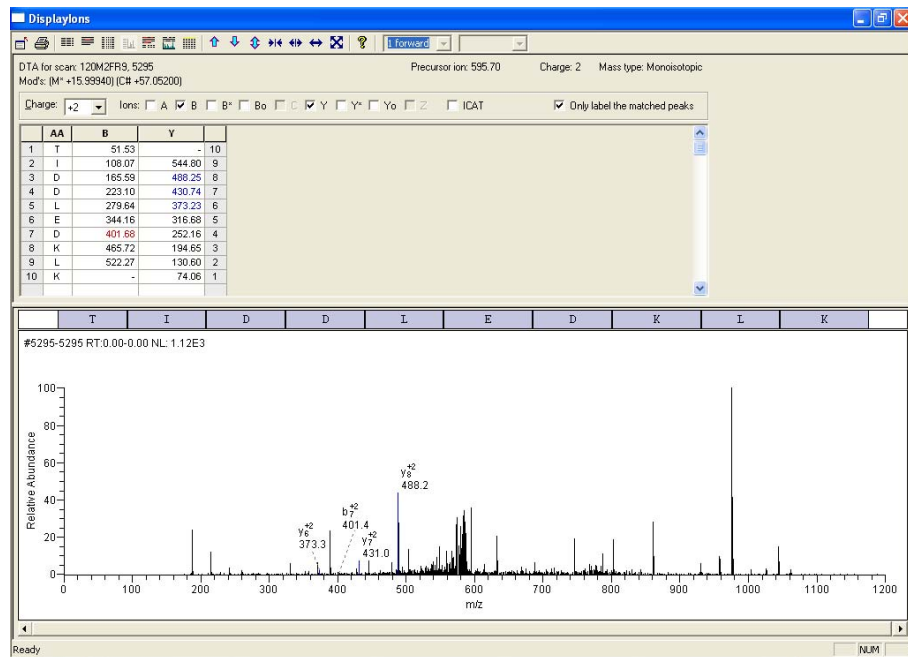

# RIQQEIAVQNPLVSERL

## IPI00154004.1, IPI00755837.1

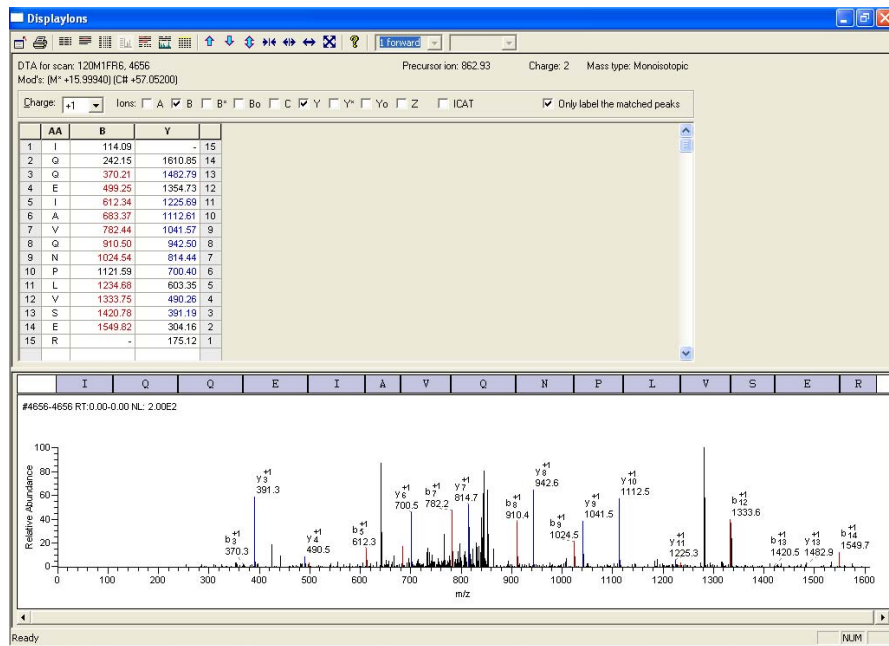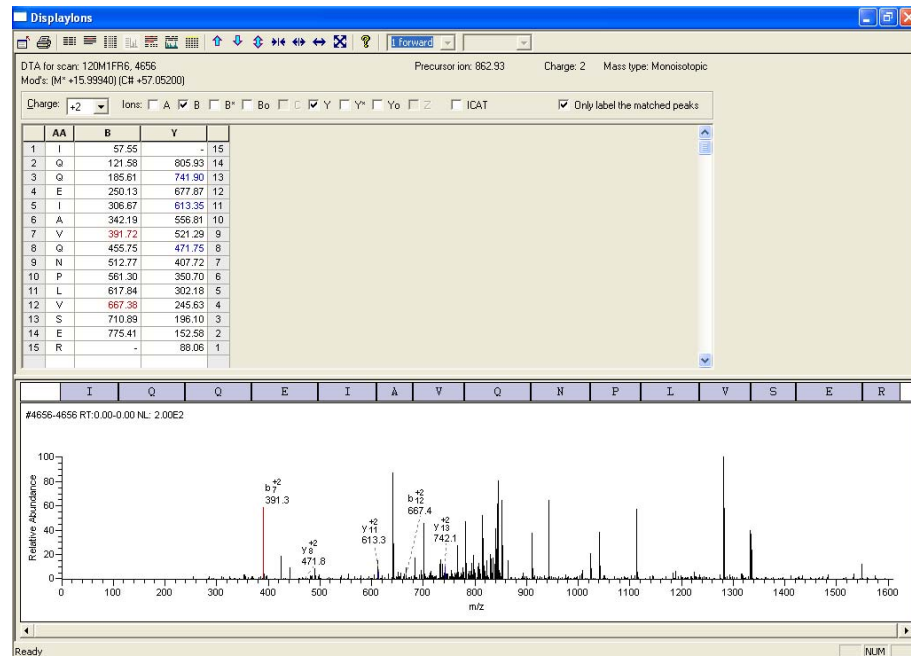

# RIQTQPGYANTLRE IPI00124771.1

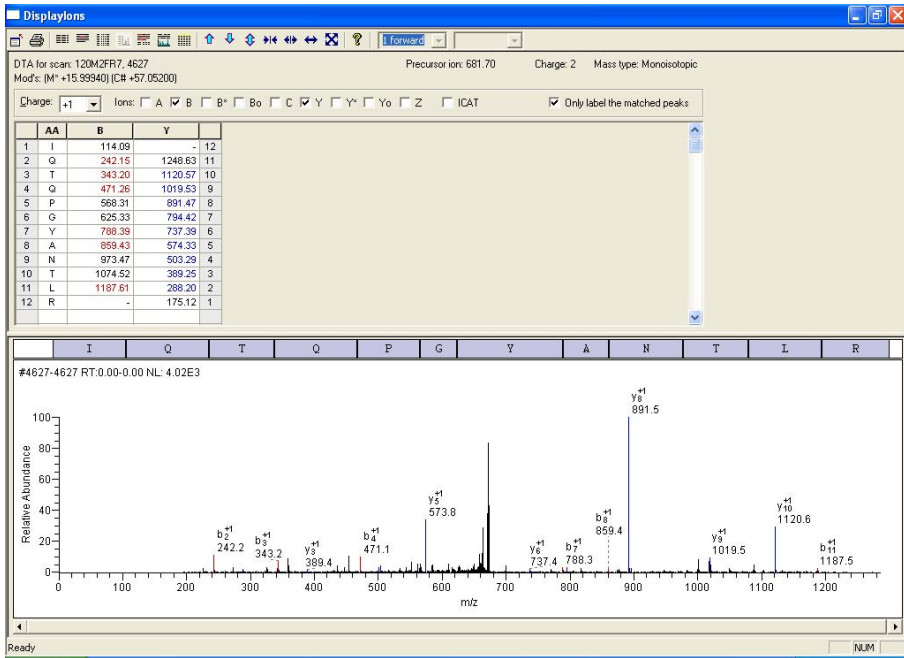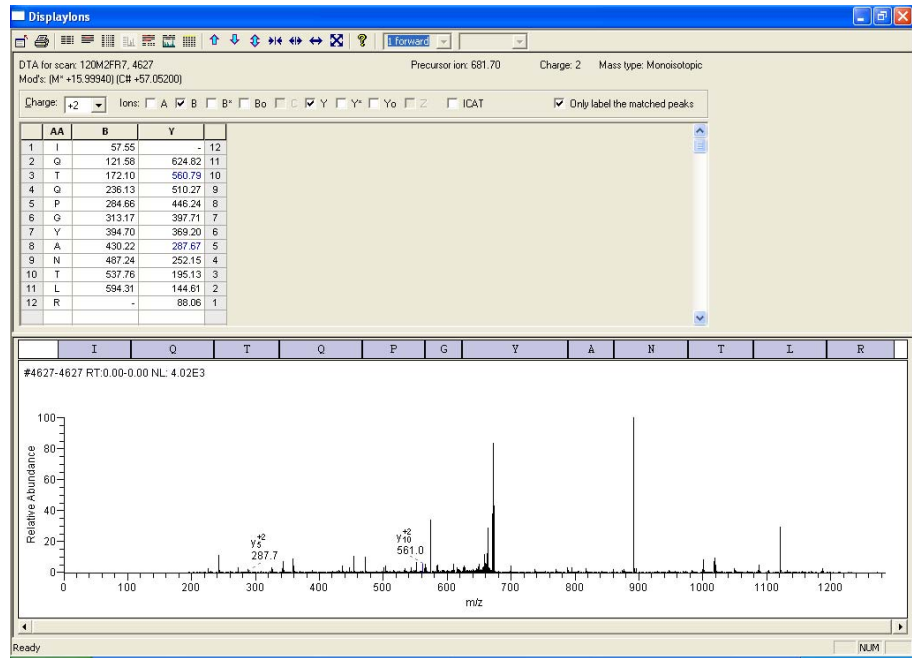

# RISQTNYPITQQDVLRT IPI00338854.2

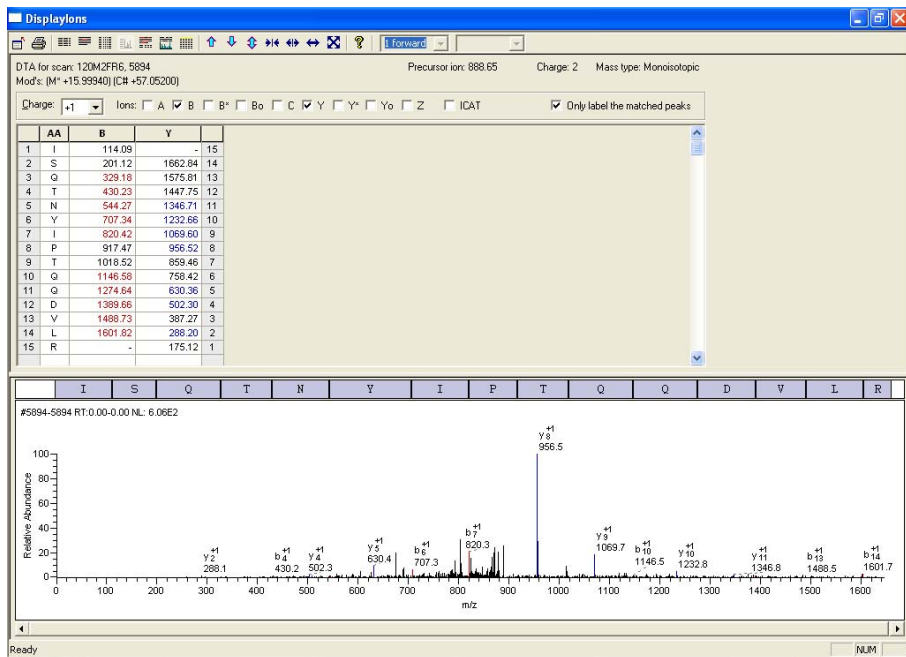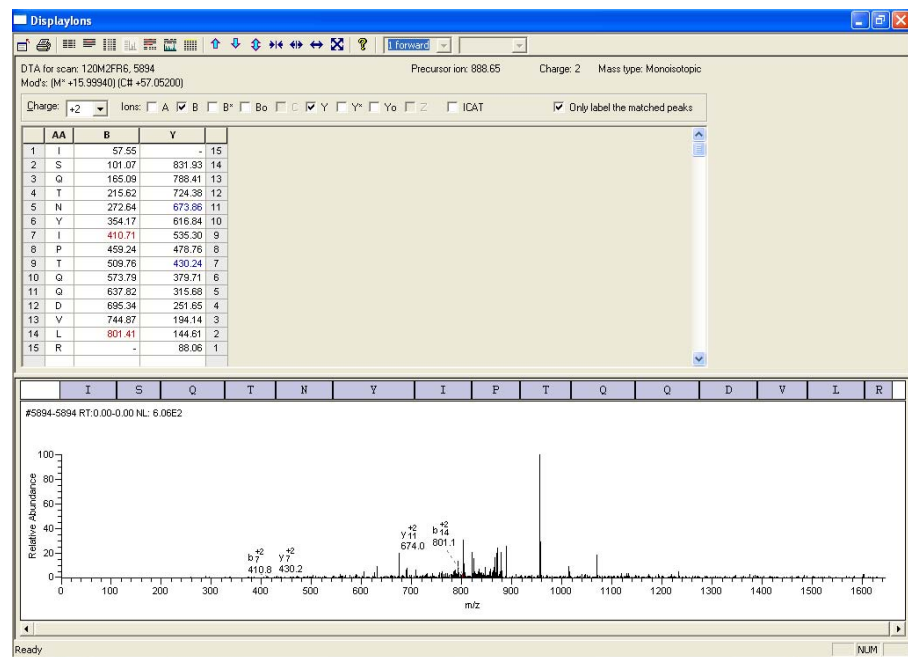





# RITATDAEDQGVKV IPI00135190.3

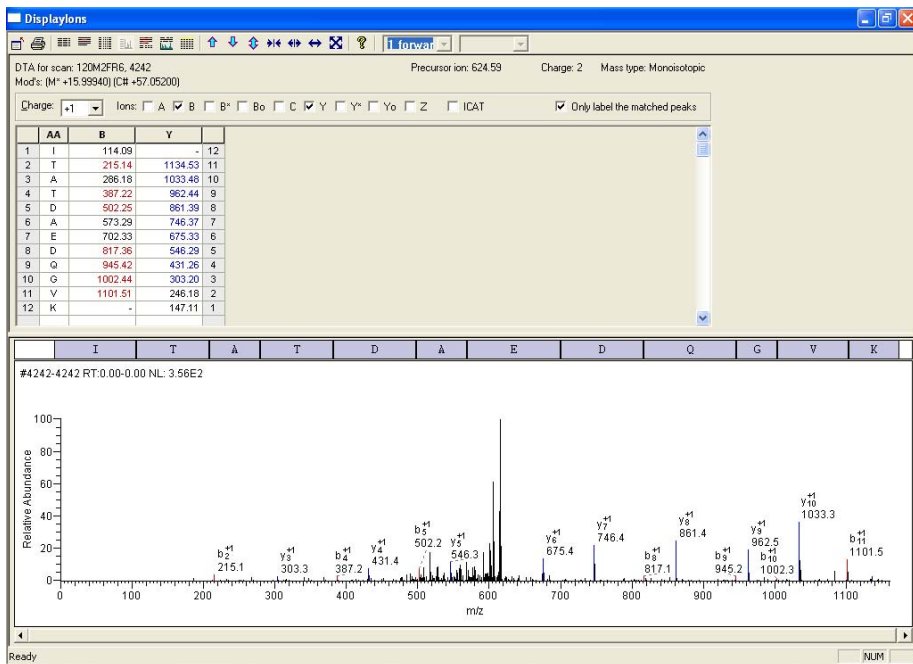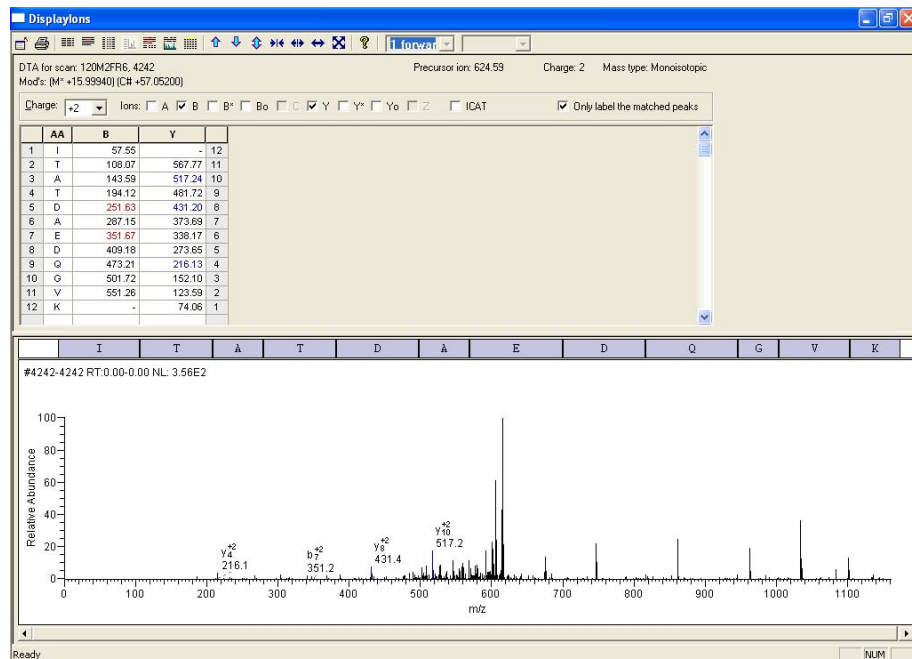

# RIVAATLSDPELFKE

## IPI00230204.6, IPI00757512.1

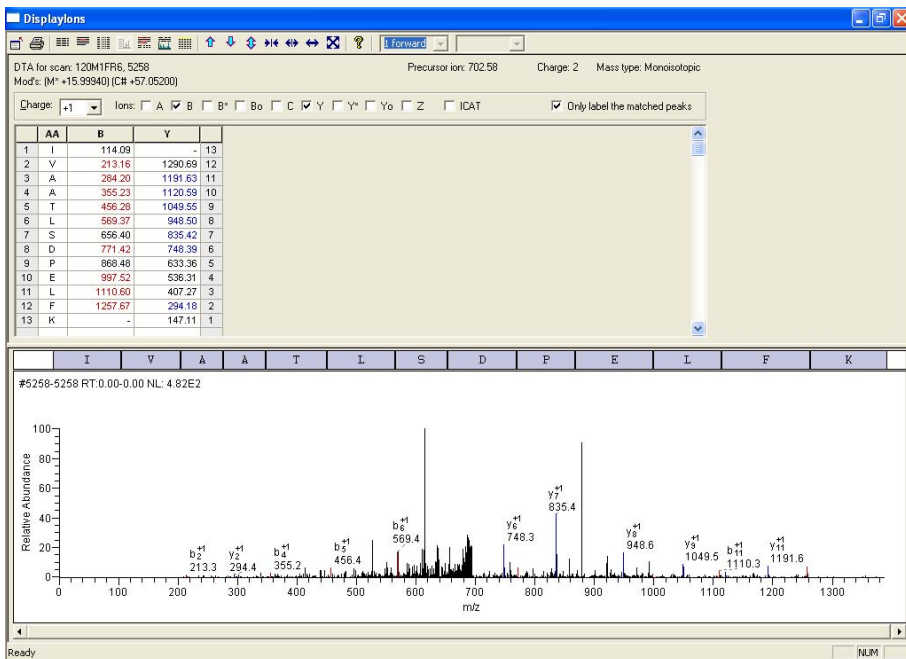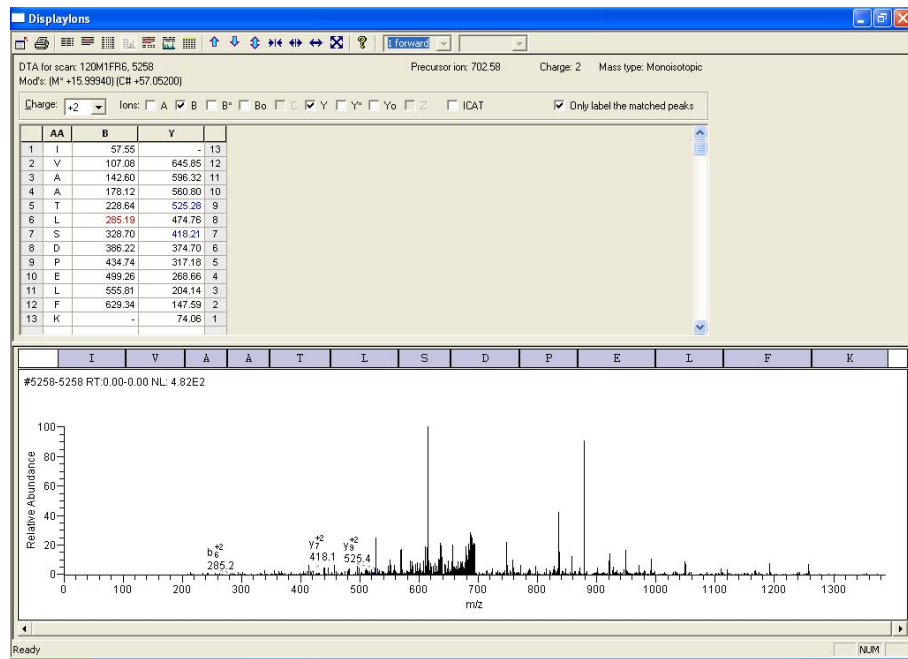

# RKASGPPVSELITKA

## IPI00223713.4, IPI00331597.5

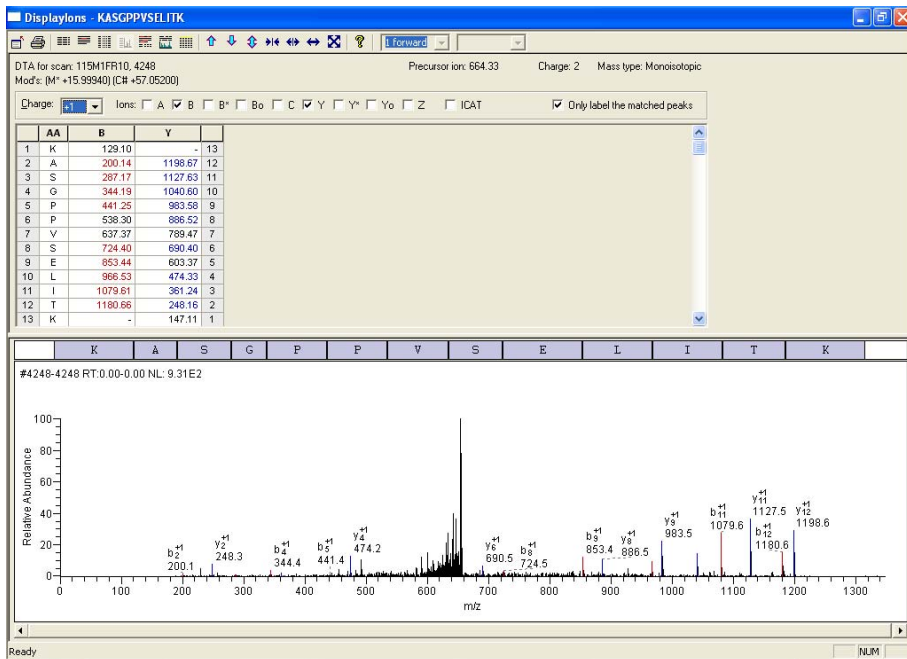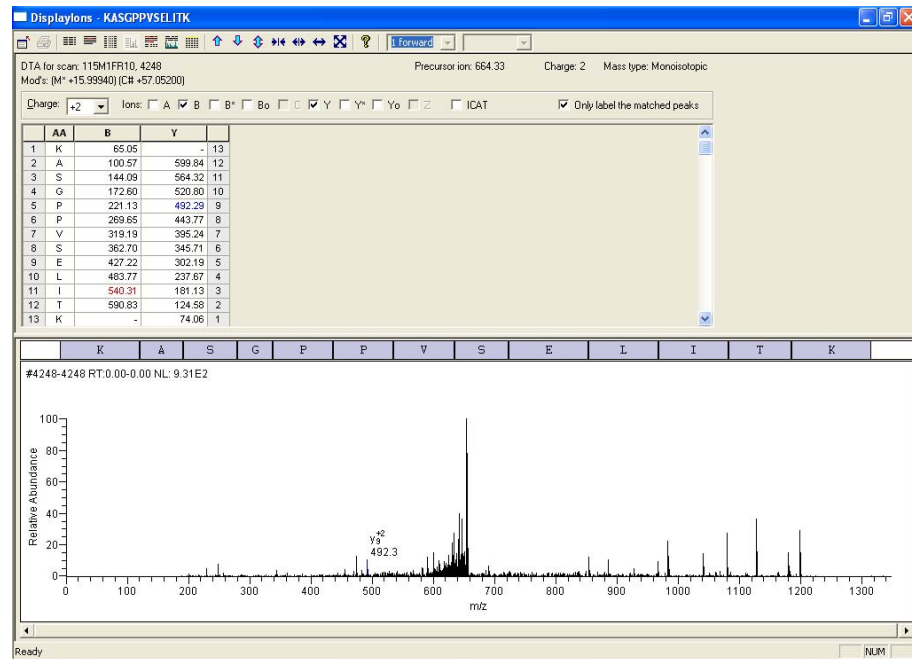

# RKDHPFGFVAVPTKN

## IPI00119227.1, IPI00407540.1, IPI00475301.1

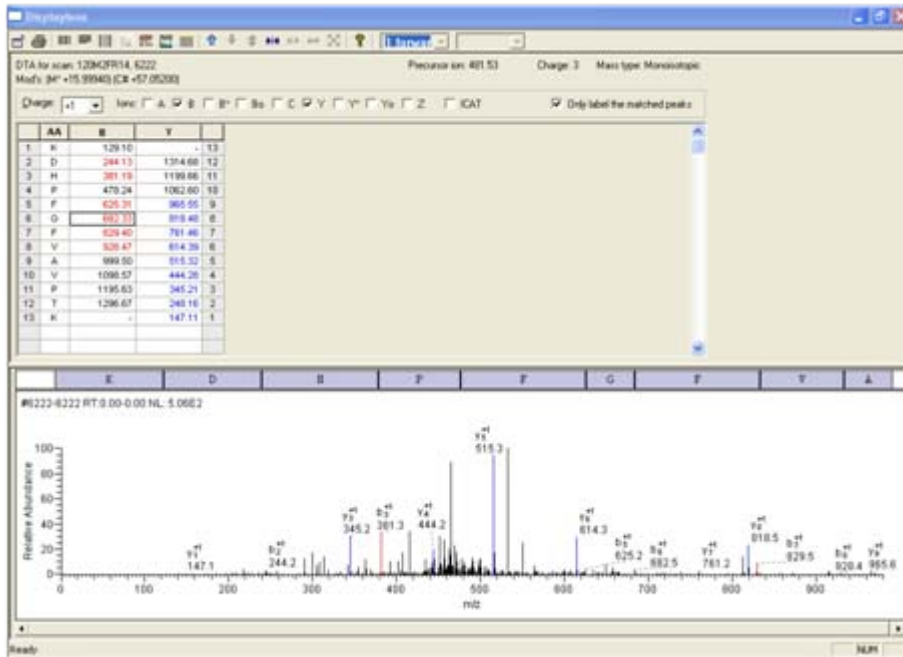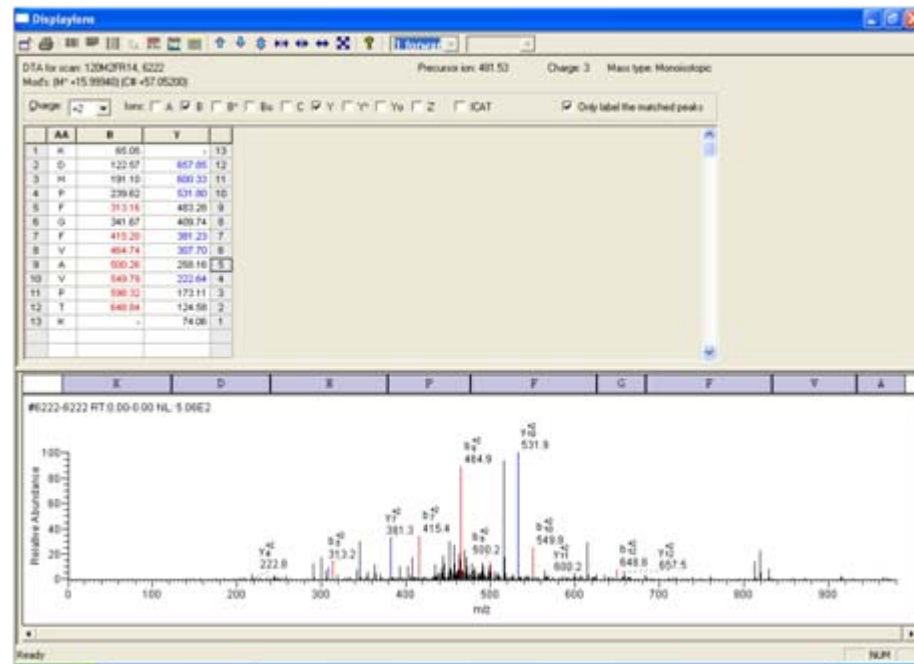

RKDHPFGFVAVPTKN  
IPI00119227.1, IPI00407540.1, IPI00475301.1

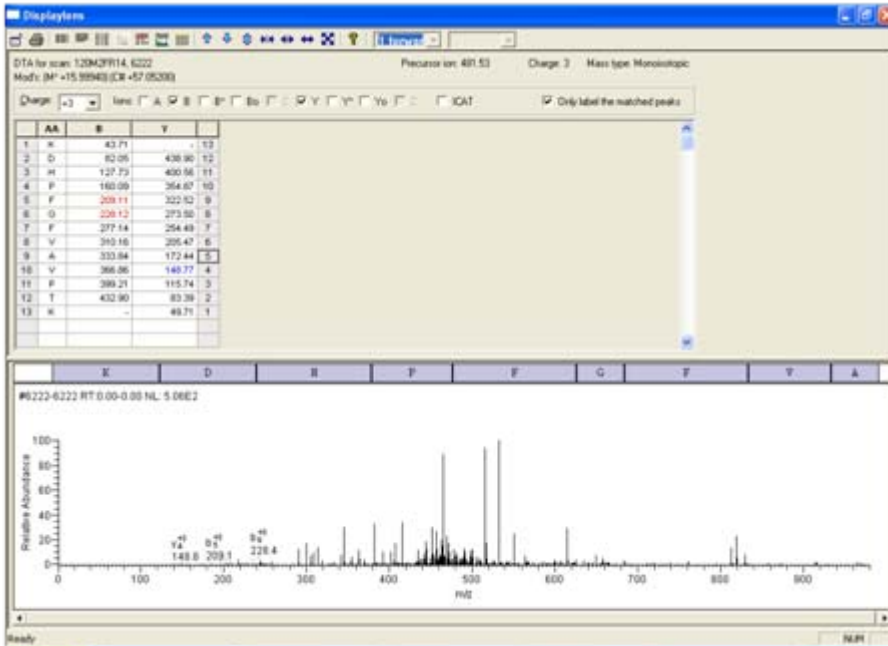

# RKPLLESGLTGTKG

## IPI00123313.1, IPI00132251.2, IPI00337053.2

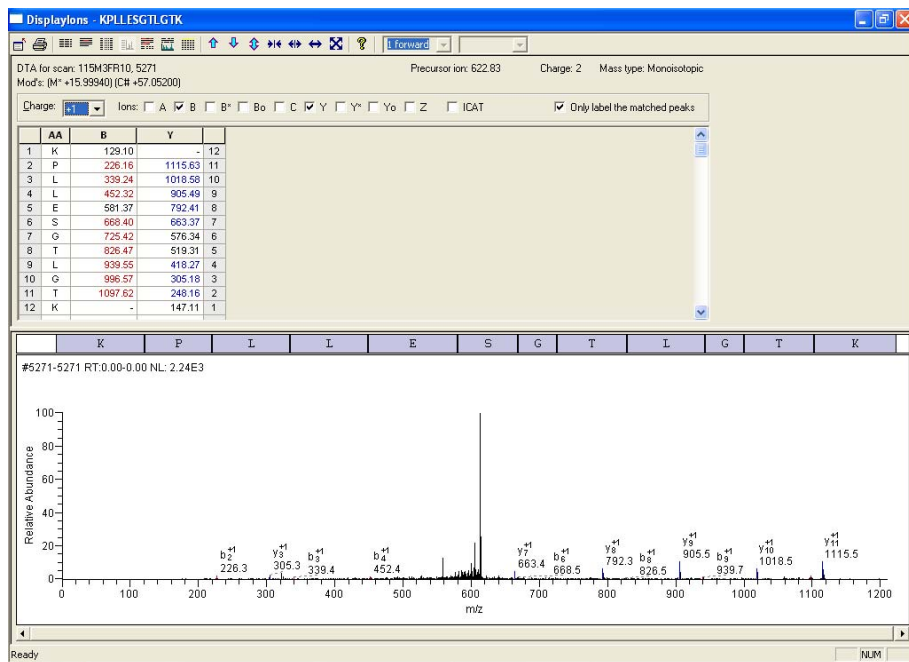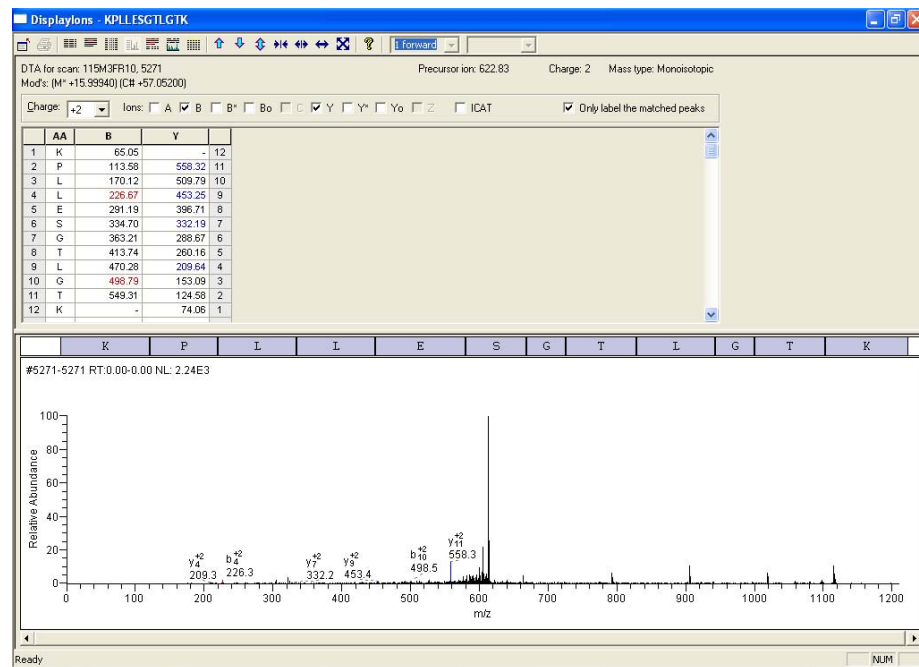

# RLAAIQESGVERQ

## IPI00119239.2

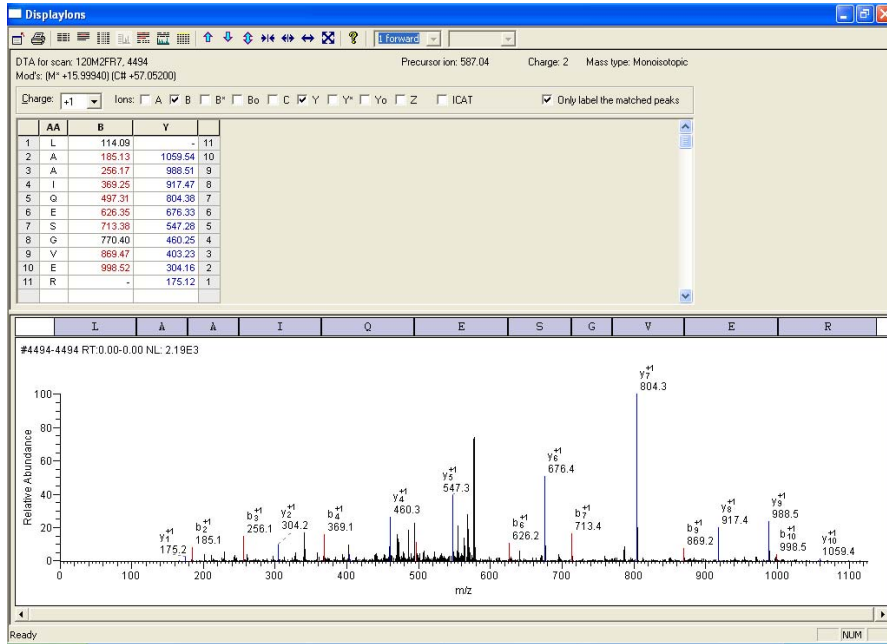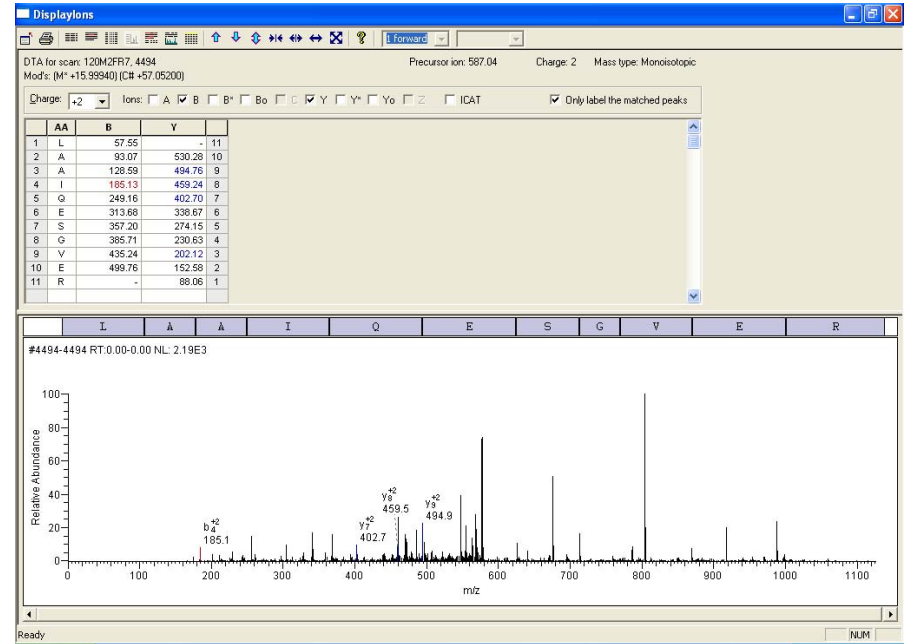



# RLAGNEQVTRD

## IPI00110856.2, IPI00227815.1, IPI00621537.1

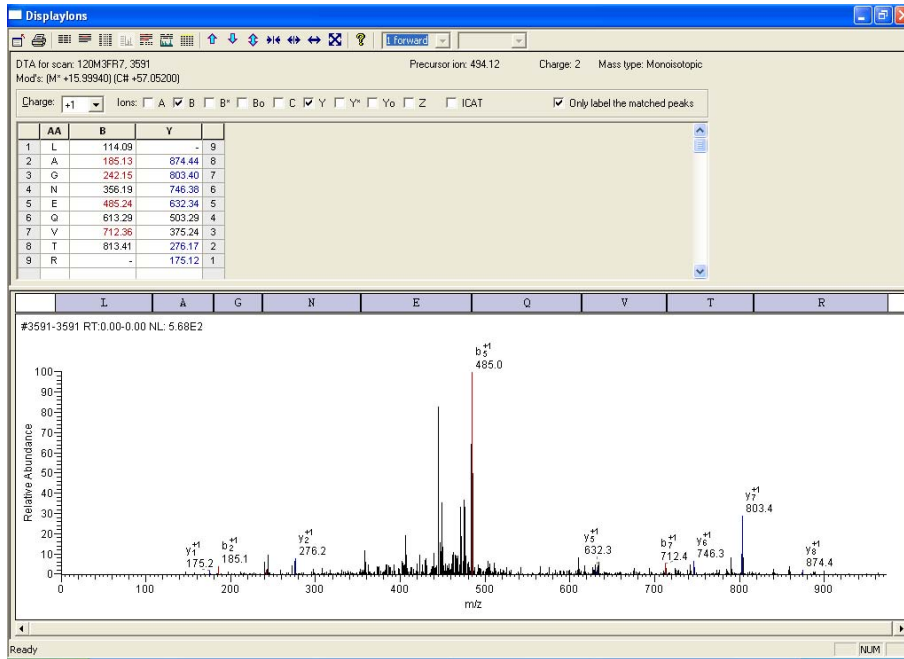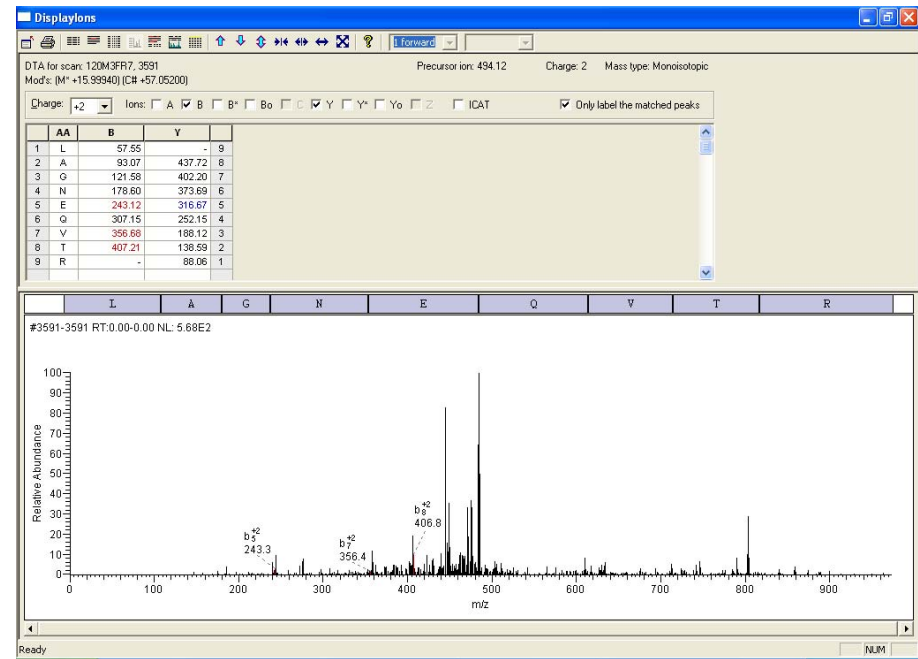

# RLAPDYDALDVANKI

IPI00458748.2, IPI00461456.1, IPI00475232.1, IPI00662510.1, IPI00752639.1,  
IPI00752985.1, IPI00754976.1

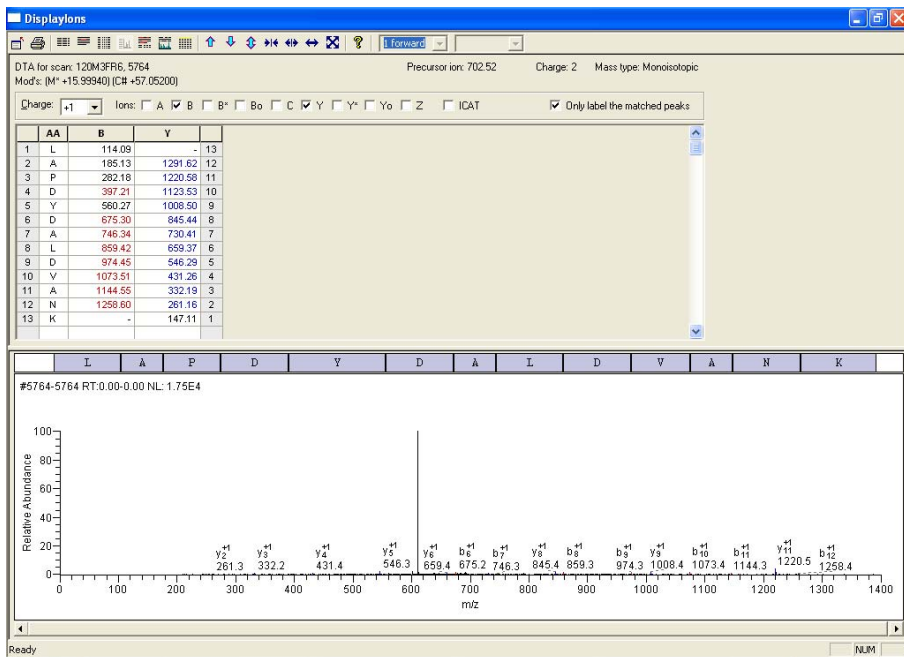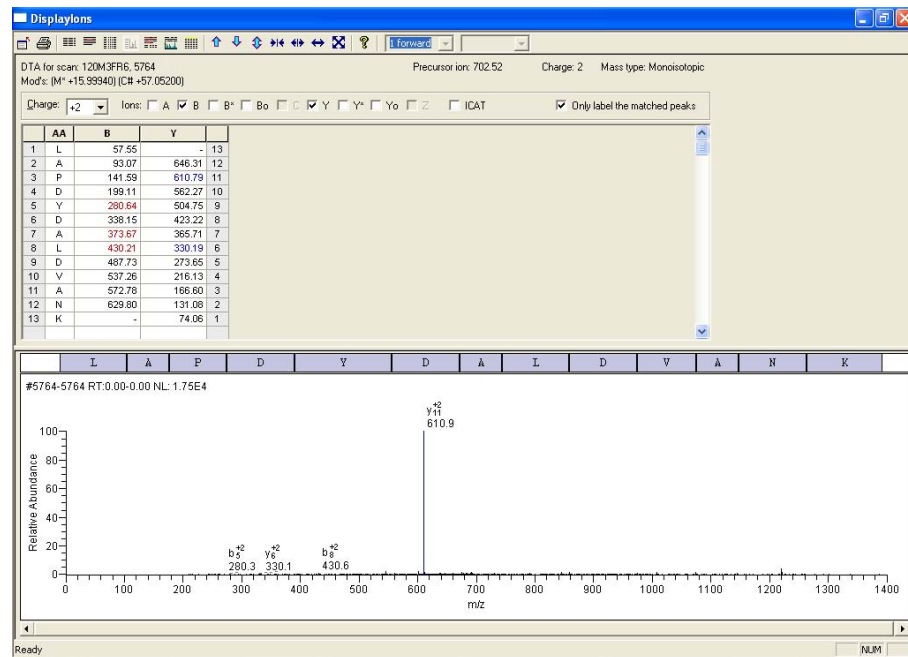

# RLASQANIAQVLAELKE

## IPI00119689.1, IPI00378063.1

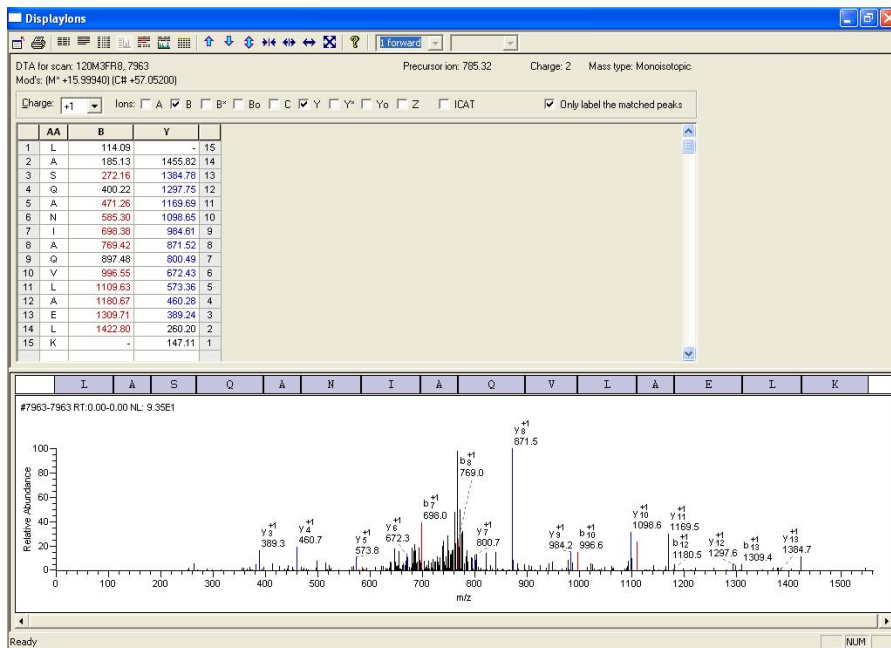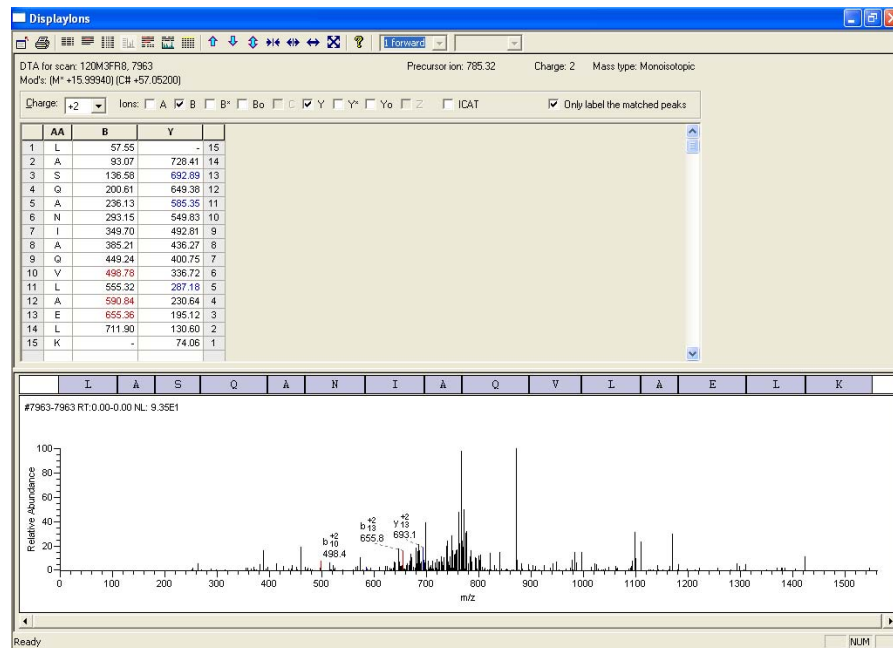

# RLDTDDLDEIEKI

## IPI00123651.1, IPI00153728.1, IPI00227749.1

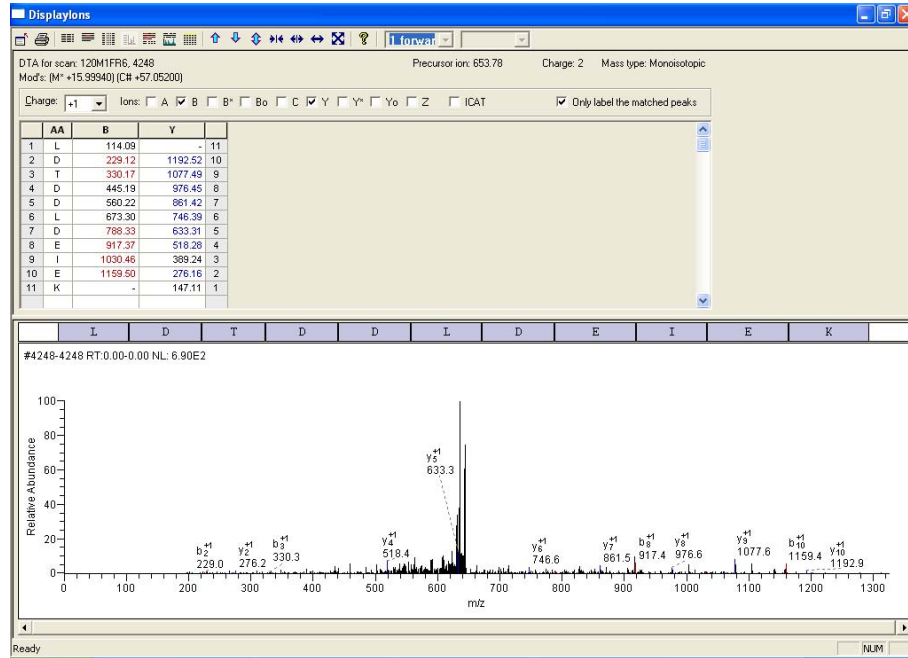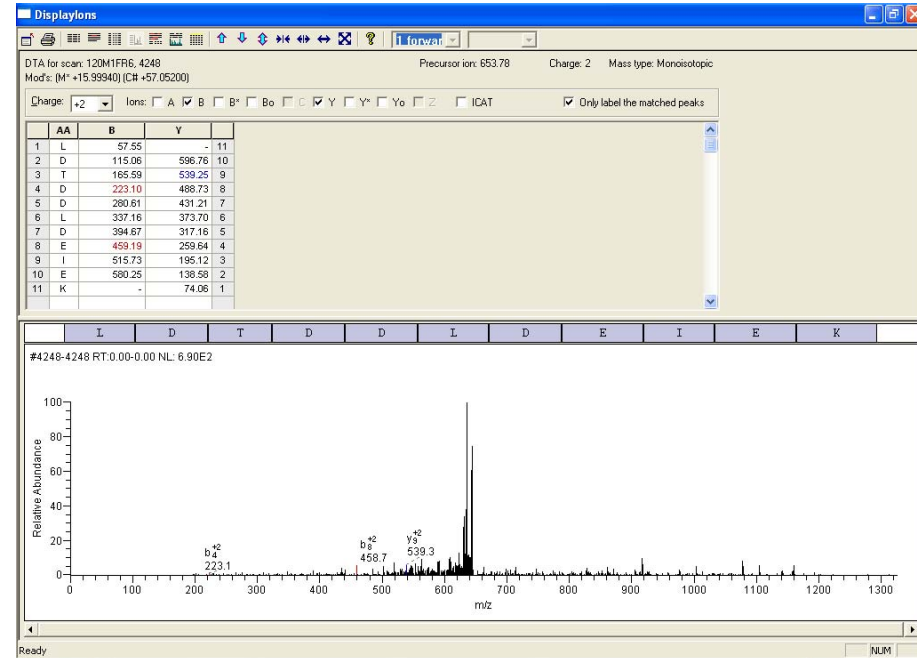

# RLDTSEVVFNTKQ IPI00310226.1

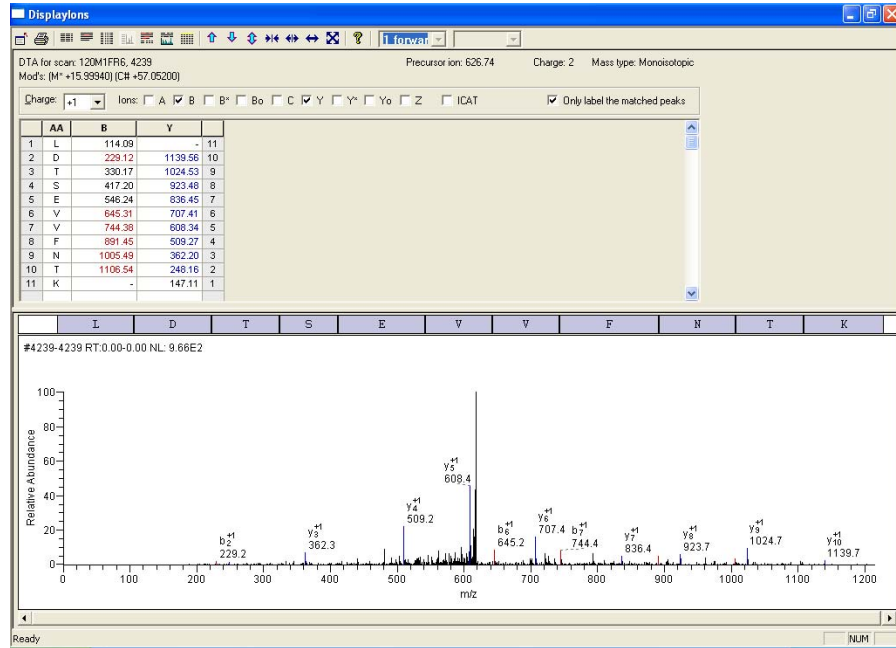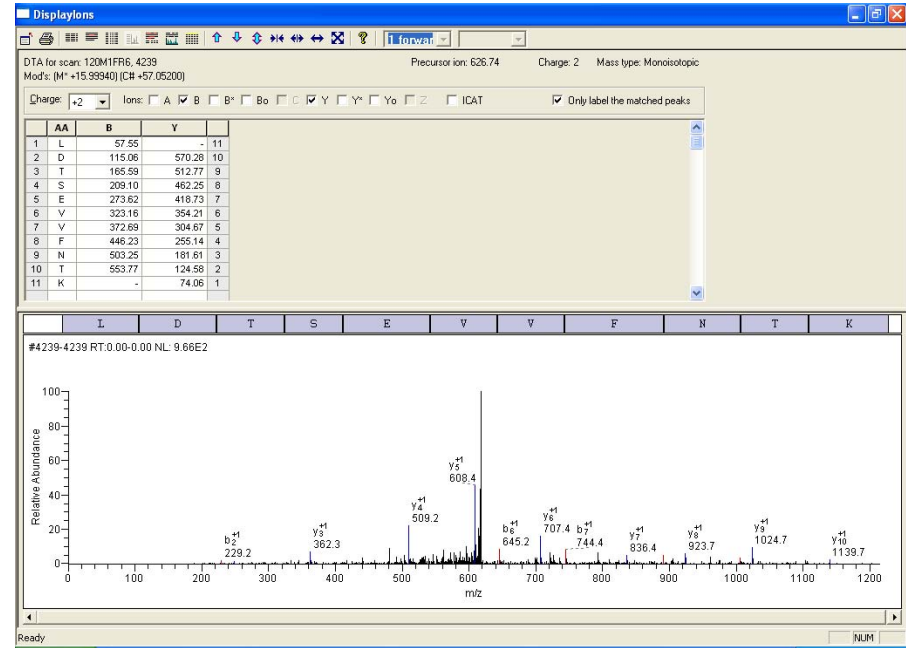

# RLEGGSGGDSEVQRT

## IPI00135640.1, IPI00462789.1

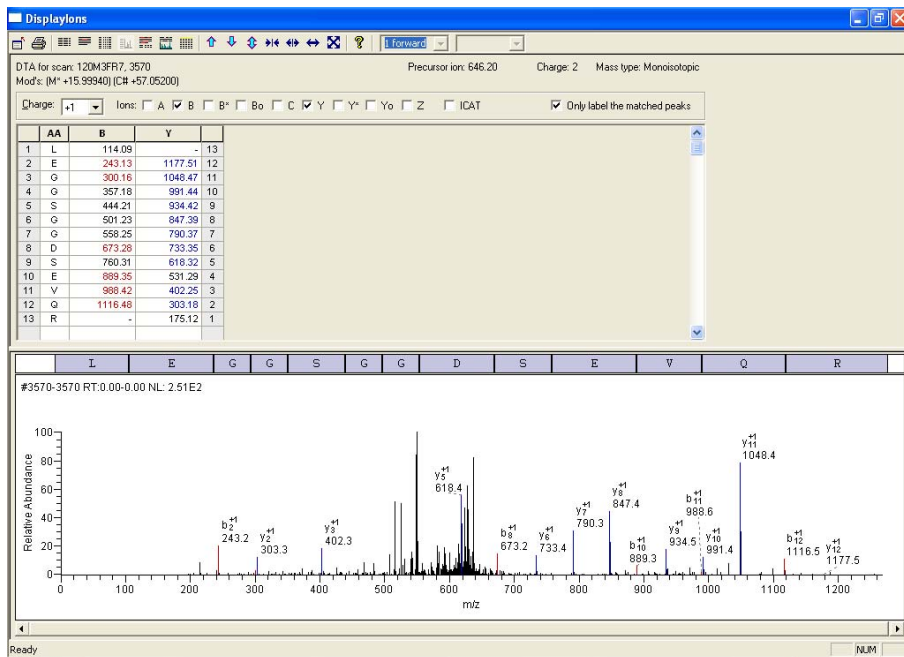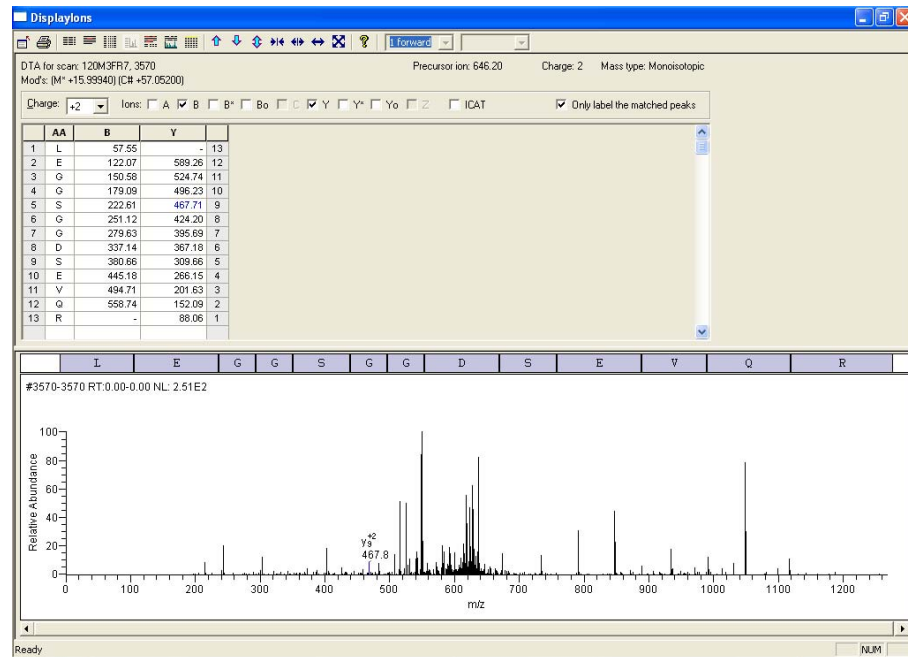

# RLEQYTNAIEGTKA

IPI00122450.1, IPI00311344.3, IPI00752748.1

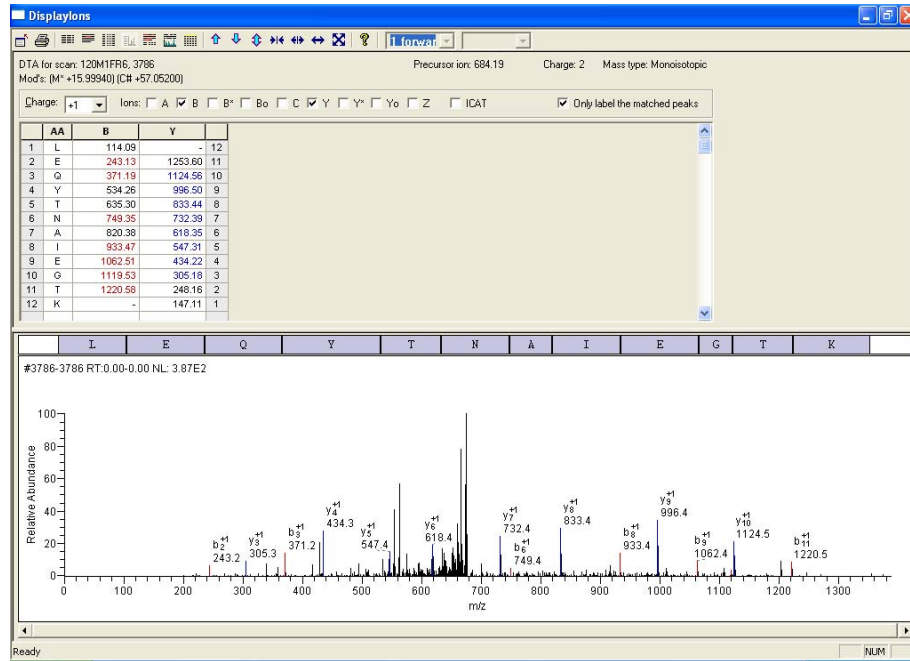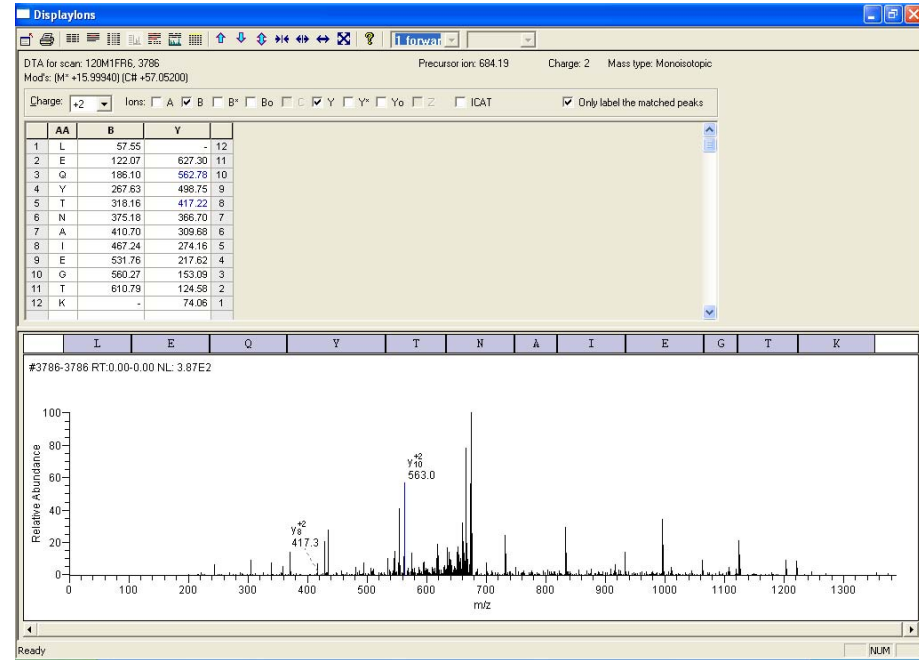

# RLESEEEGVPTAIRE IPI00114491.1

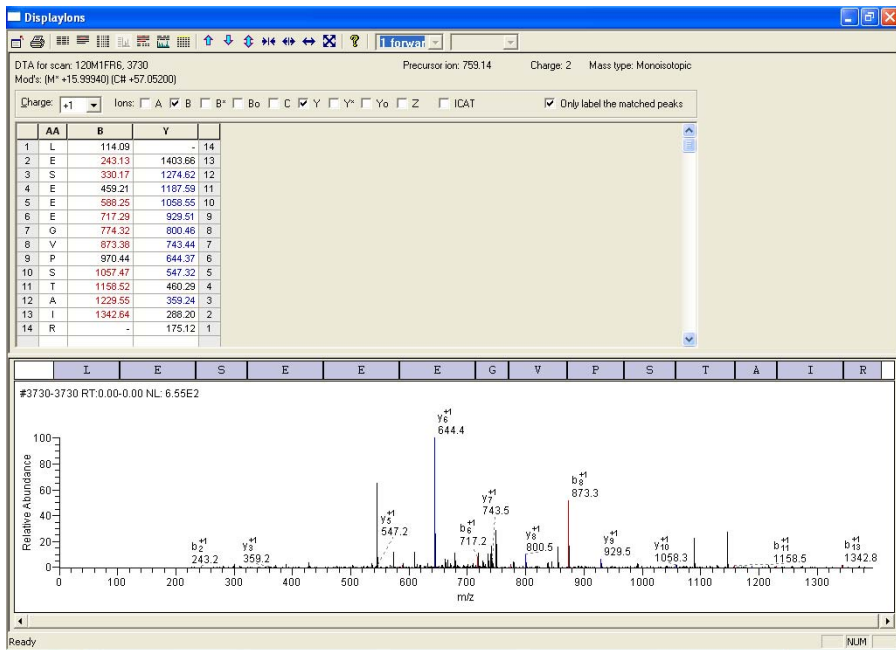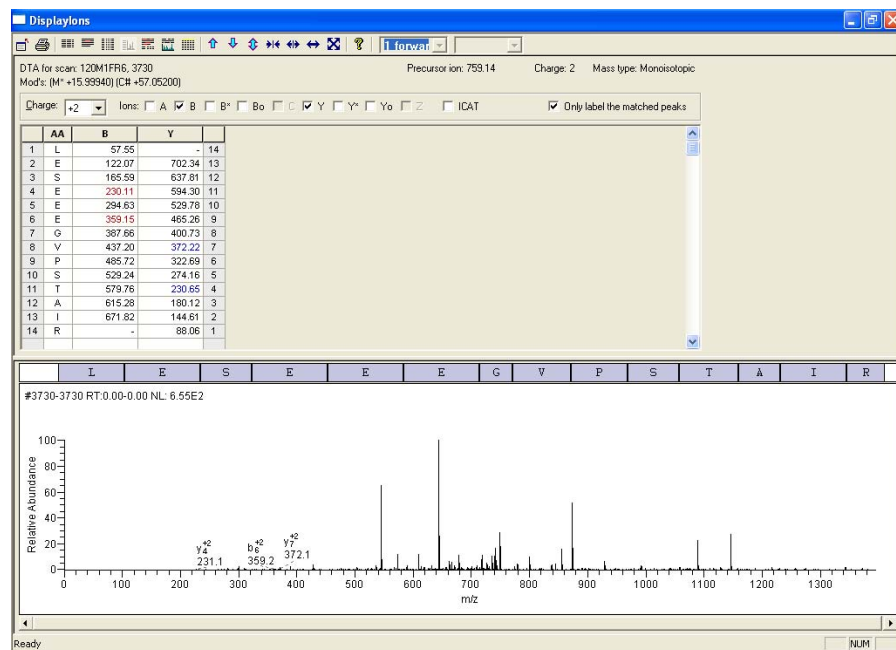



# RLGHAEQKDEMVPRL

IPI00222509.1, IPI00754921.1, IPI00755404.1

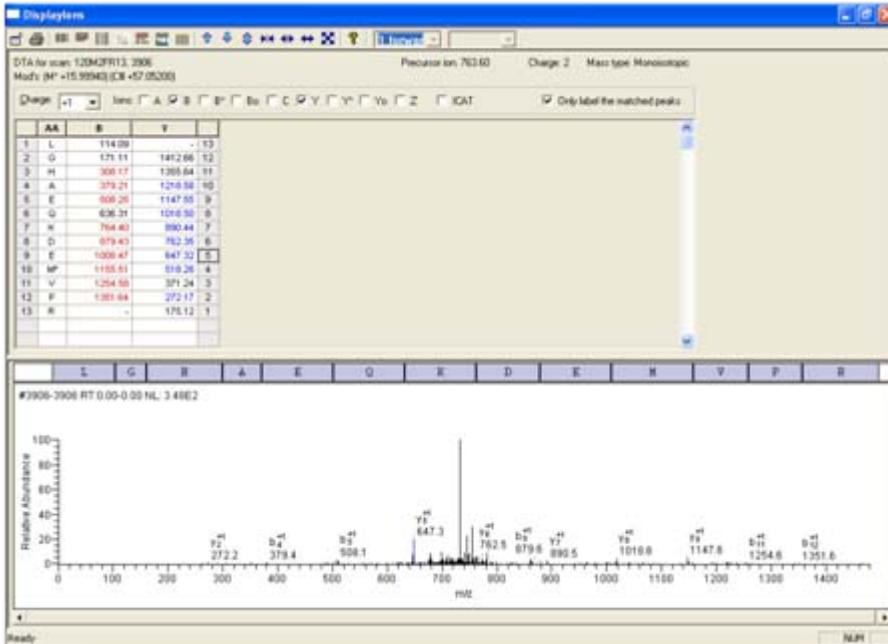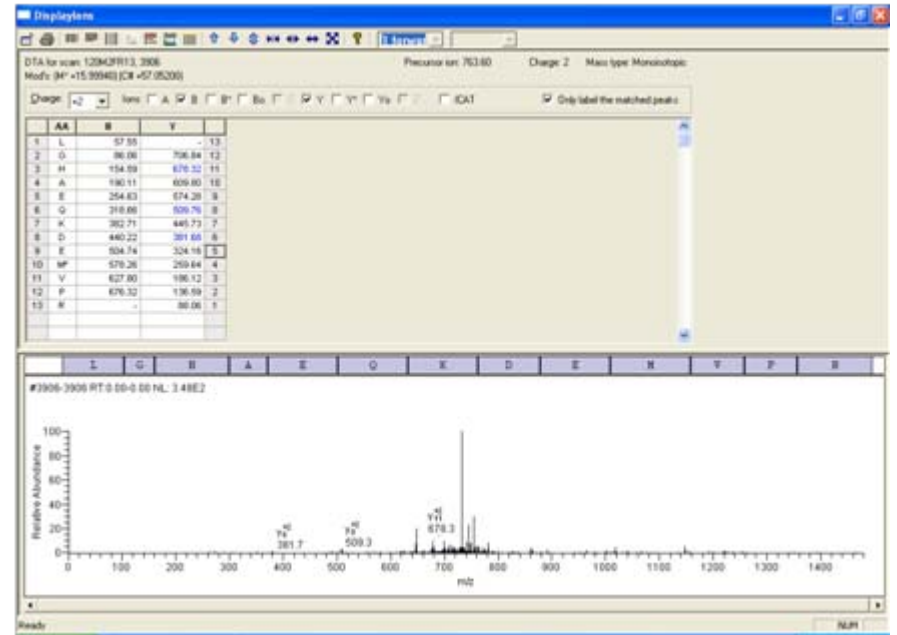

# RLGNDFHTNKRV

IPI00381546.5, IPI00465880.3, IPI00622165.2, IPI00755495.1, IPI00756135.1

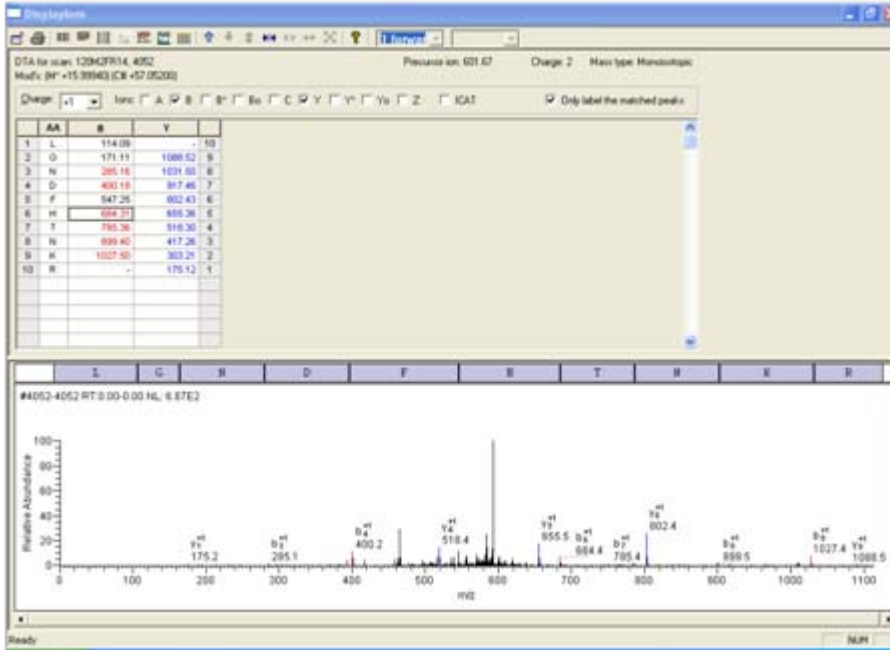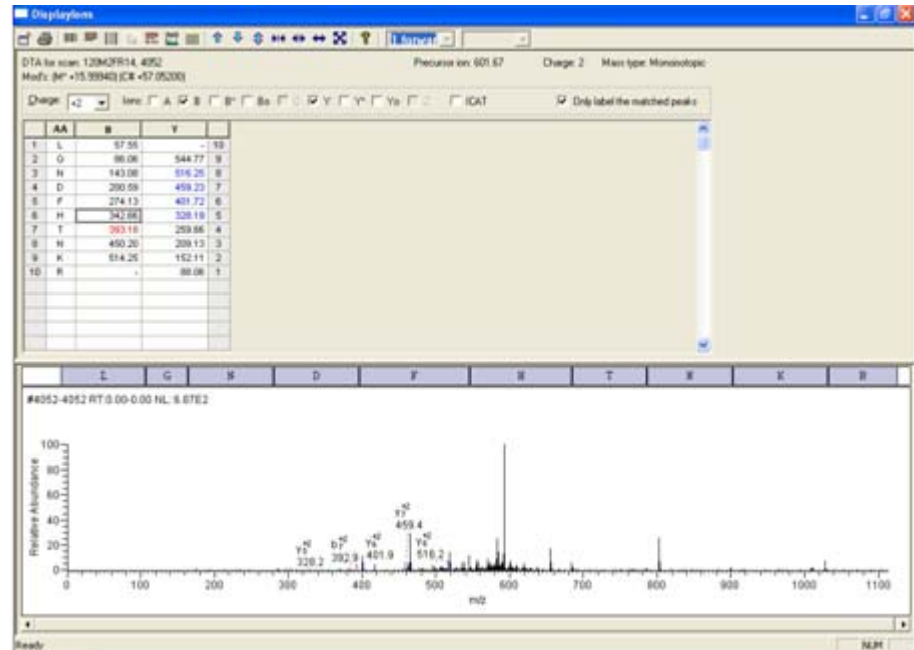

# RLLDEEEATDNDLRA

## IPI00323483.3, IPI00453818.2

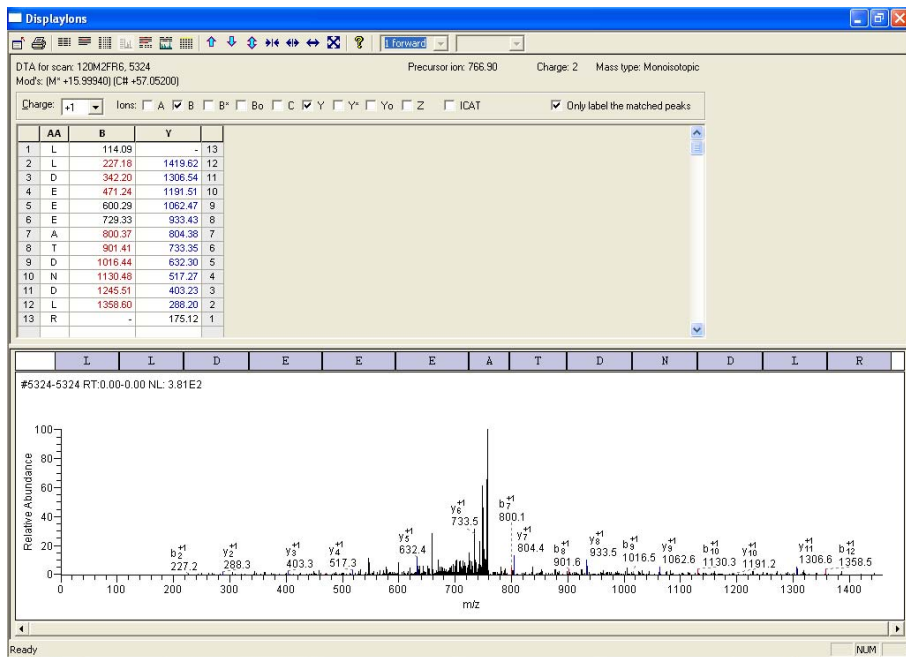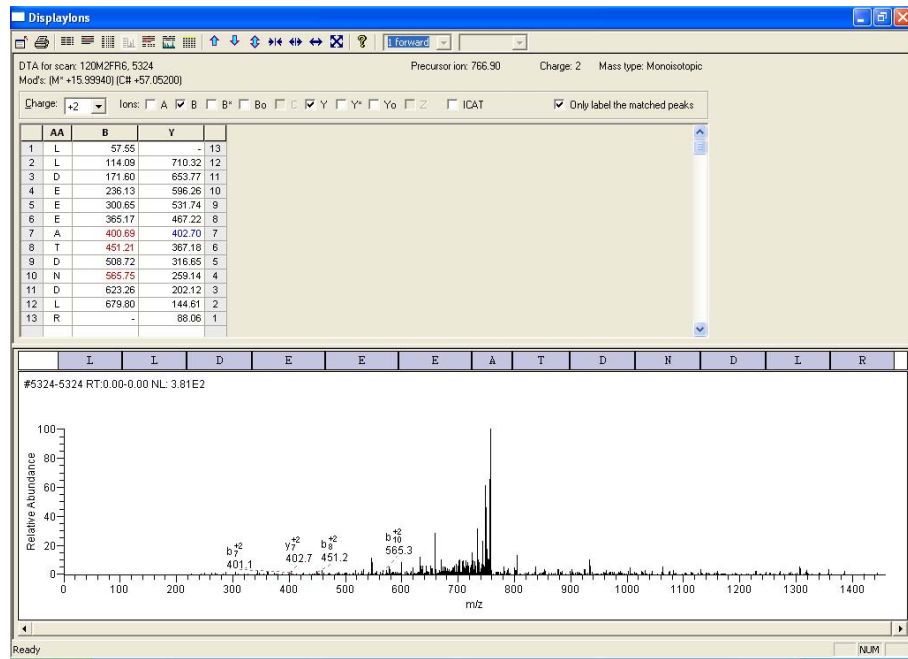

# RNAAQVLVGIPLETGQKQ IPI00131871.1

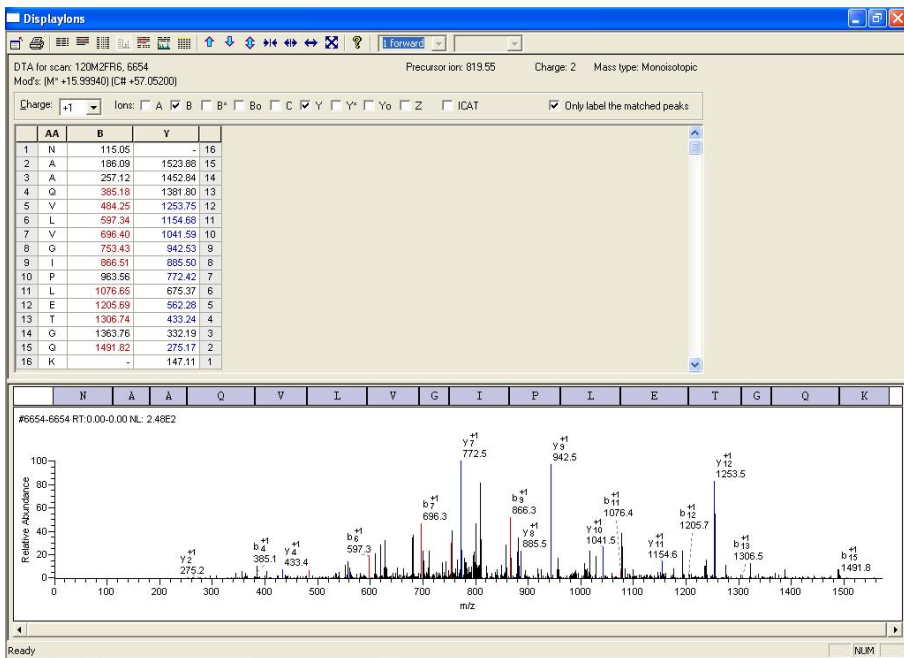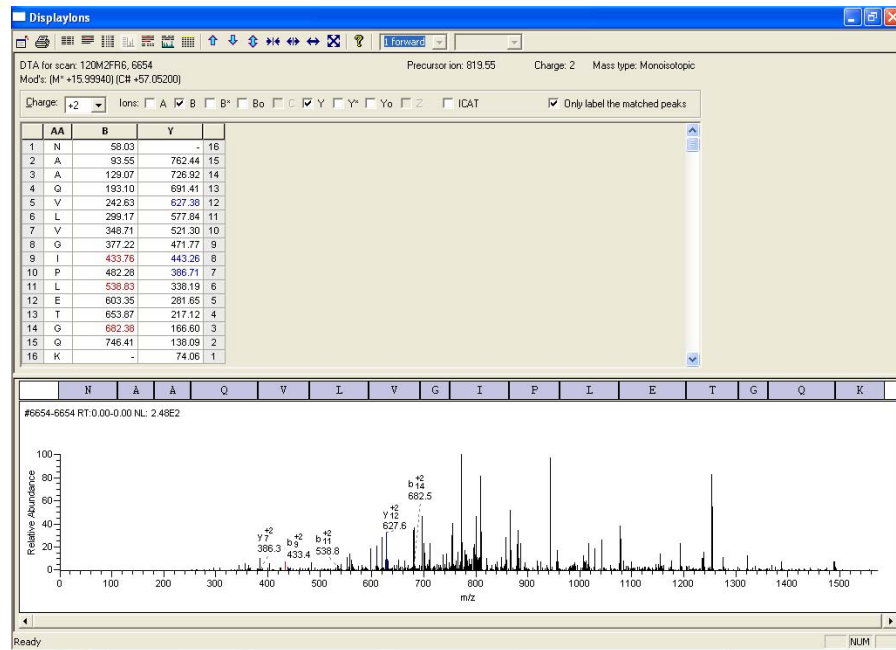

# RNFLASQVPFPSRL IPI00320847.9

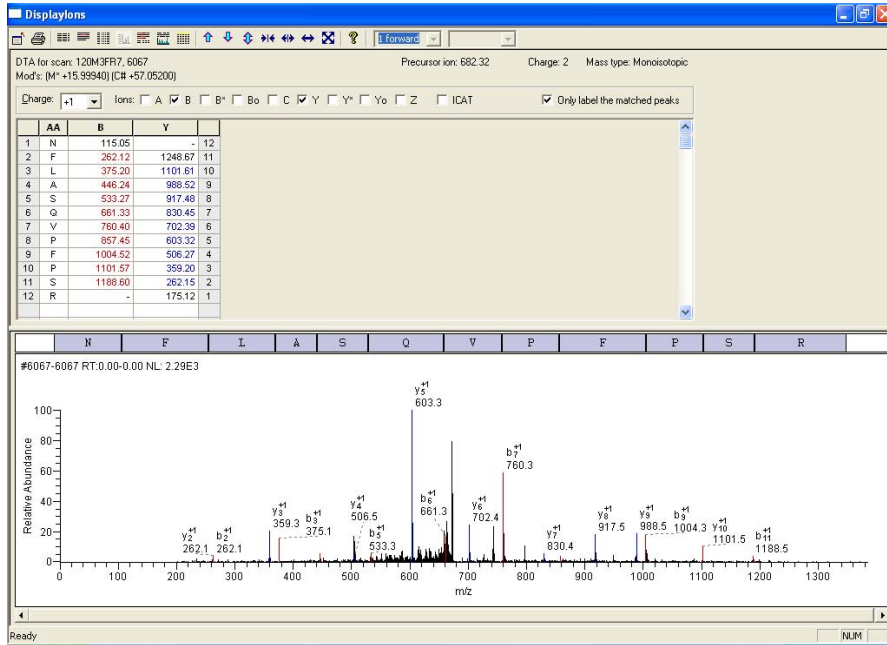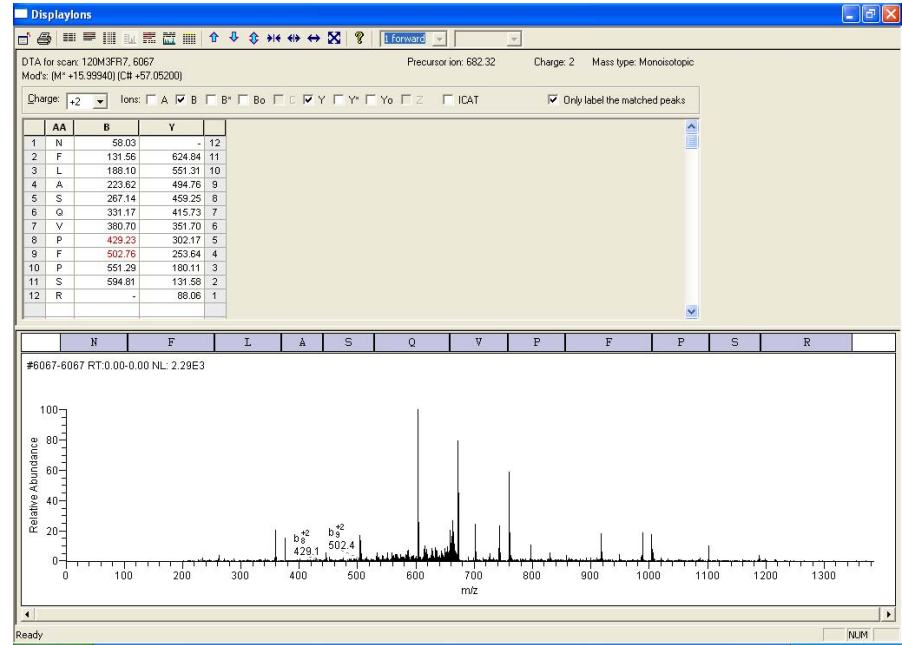

# RNIIHGSDSVESAEKE

## IPI00127417.1, IPI00379441.4

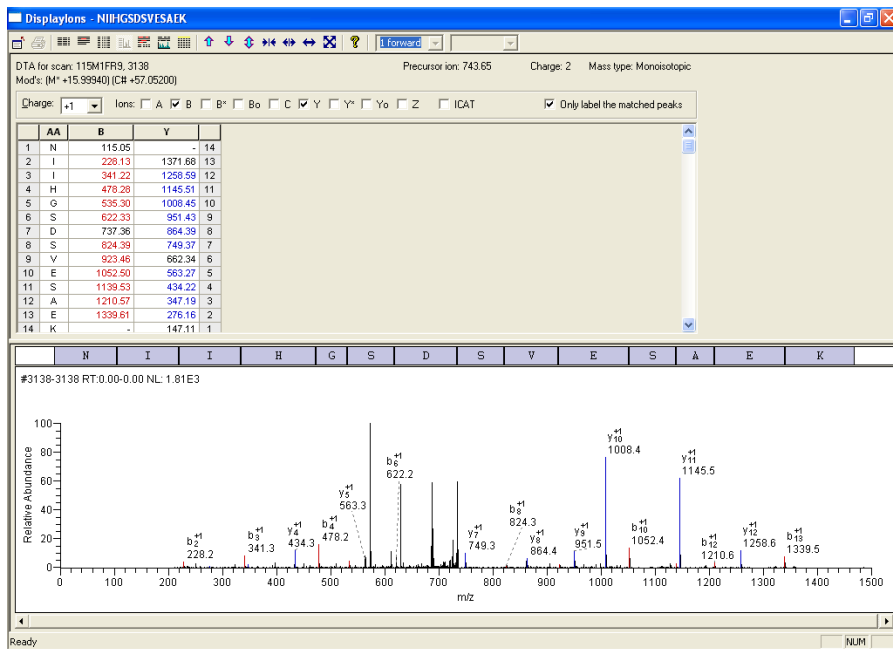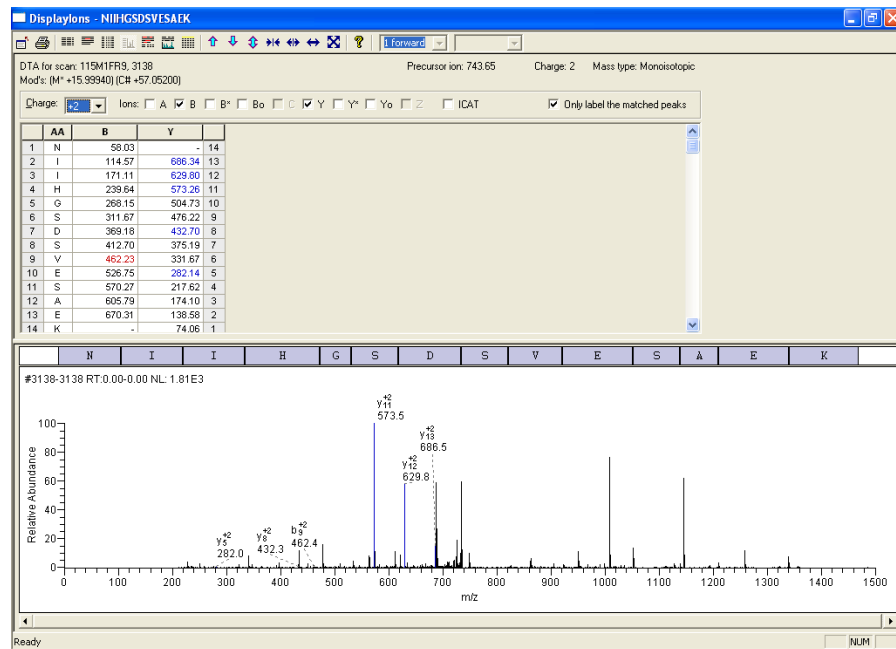

# RNLATTVTEEILEKS

## IPI00128441.3, IPI00135308.3

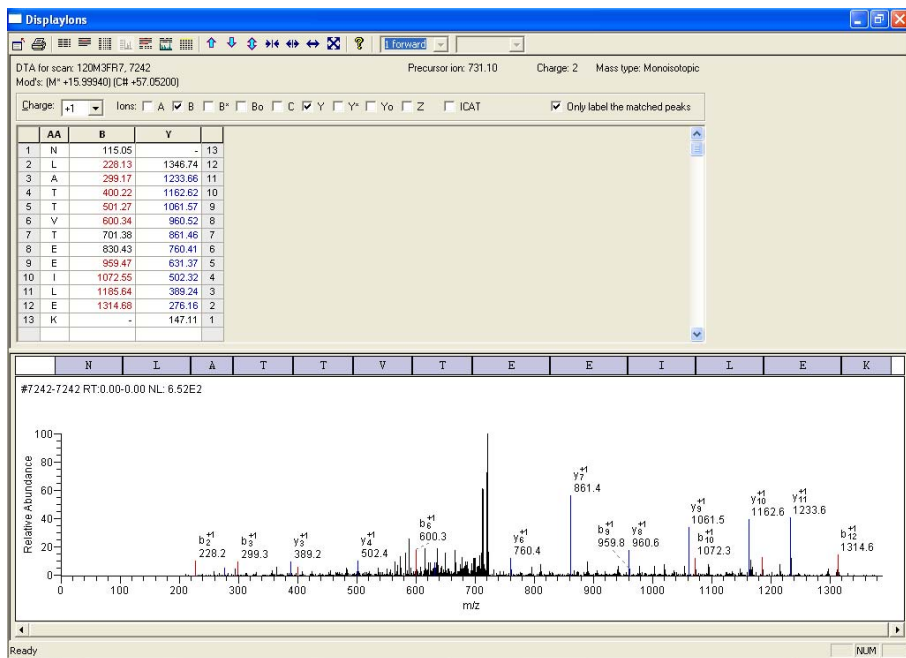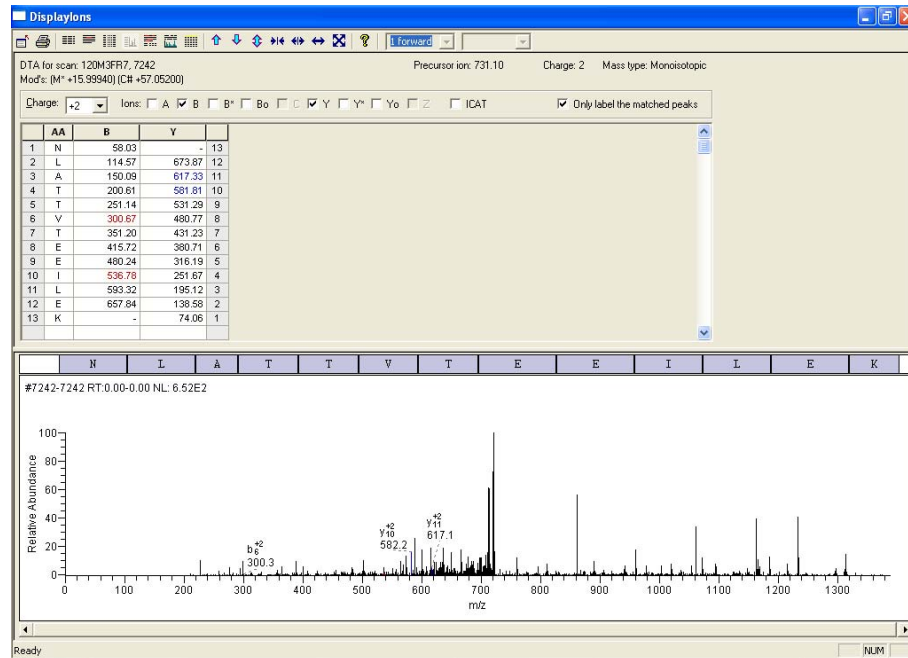

# RNNLAGAEELFARK

## IPI00169916.9, IPI00648173.1

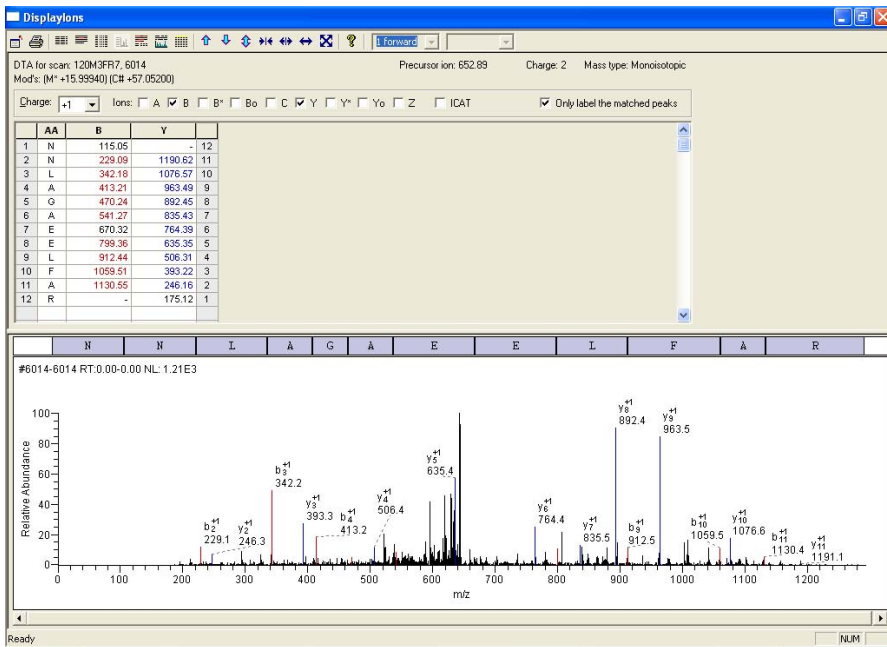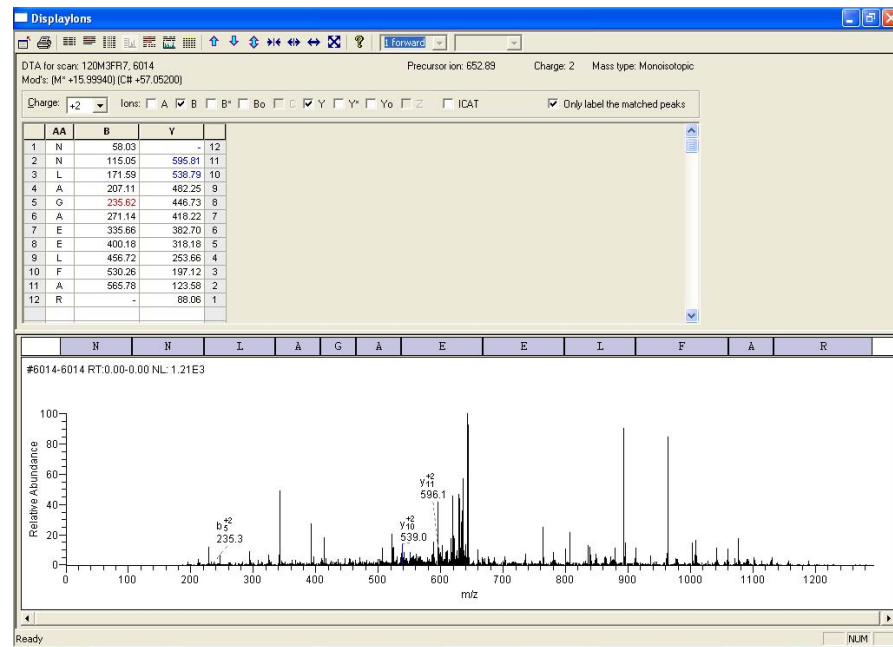



# RNPQNSSQSADGLRC

## IPI00318548.2

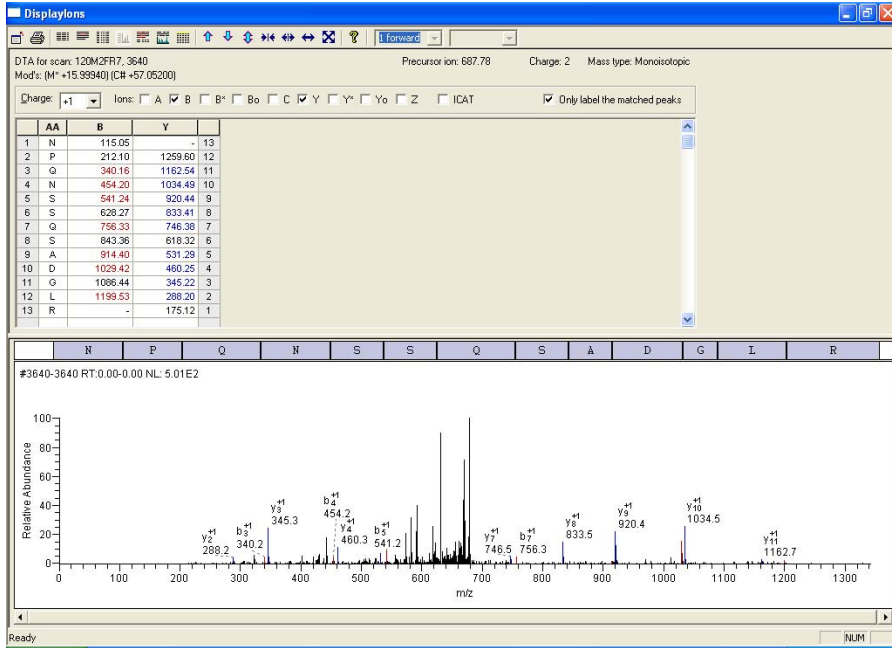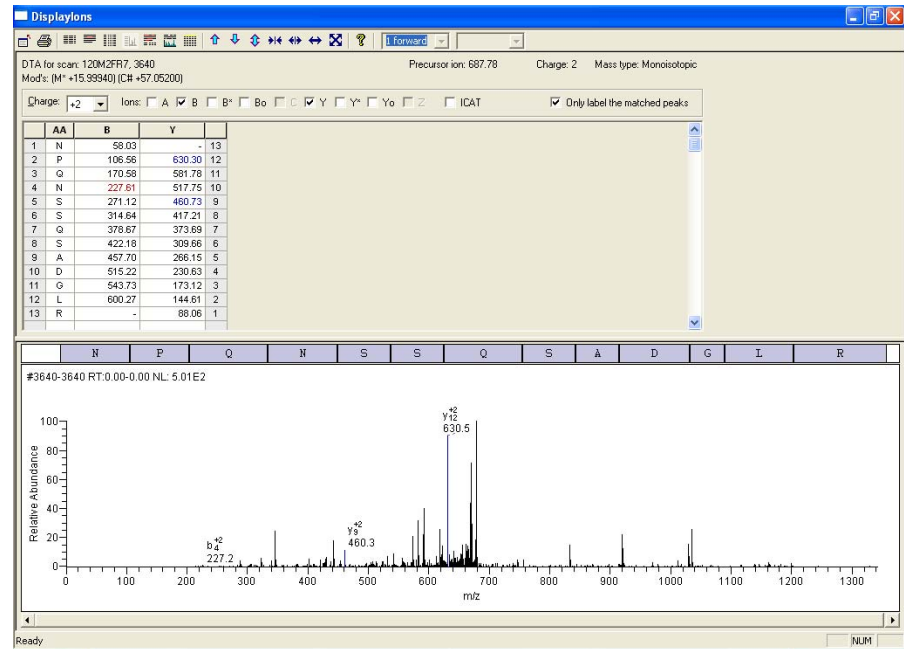

# RQEMQEVQSSRS

IPI00405058.5, IPI00468274.5, IPI00622847.1

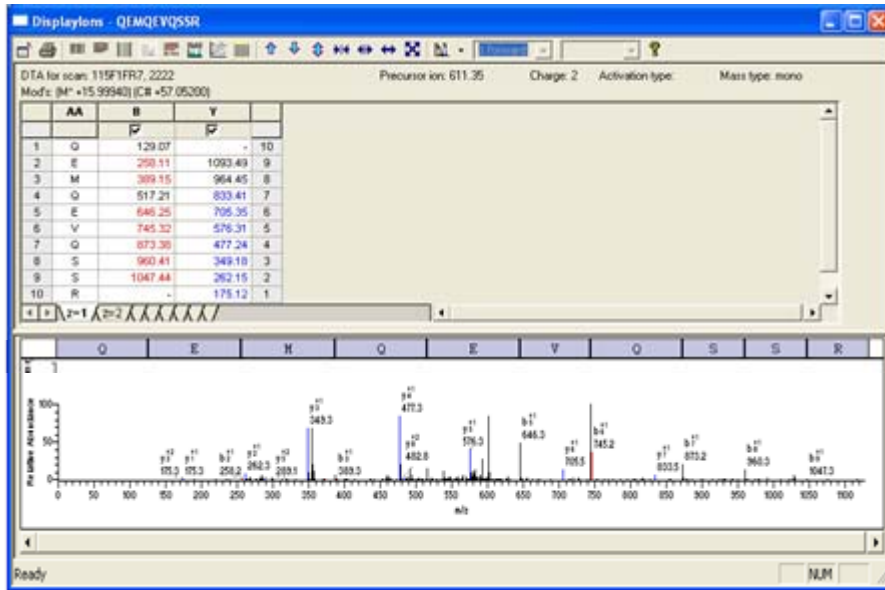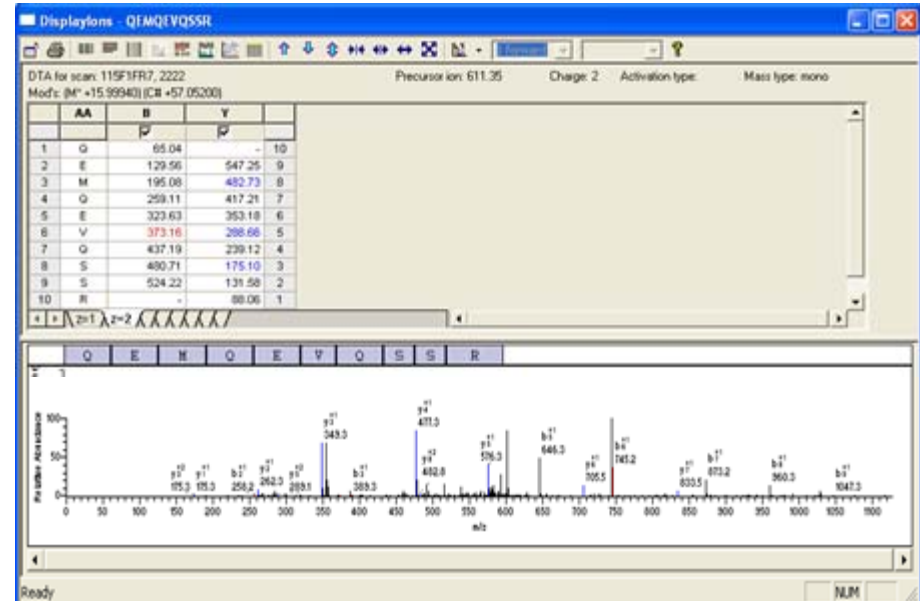

# RQPSLHMSAAAASRD

IPI00125745.1, IPI00128230.1, IPI00221805.1, IPI00330304.3, IPI00624969.3,  
IPI00654008.1

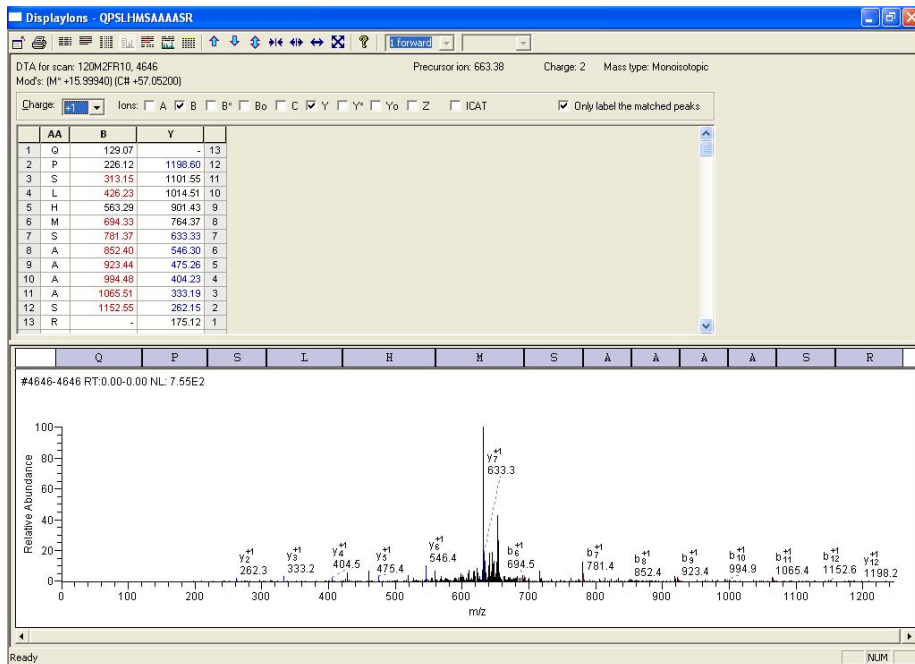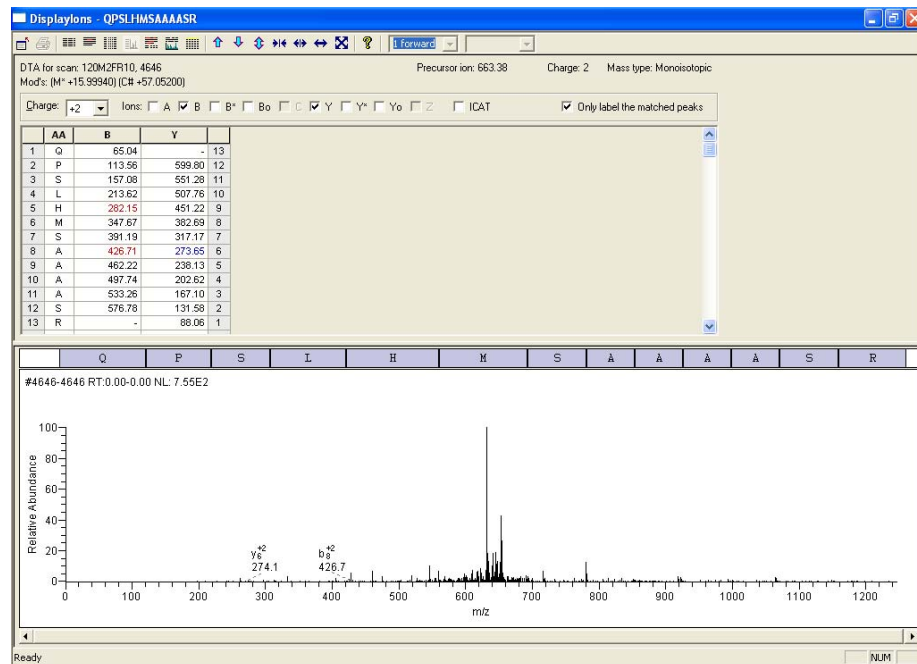

# RRAPAAQPPAAAAPSAVGSPAAPRQ IPI00284925.3, IPI00407413.1

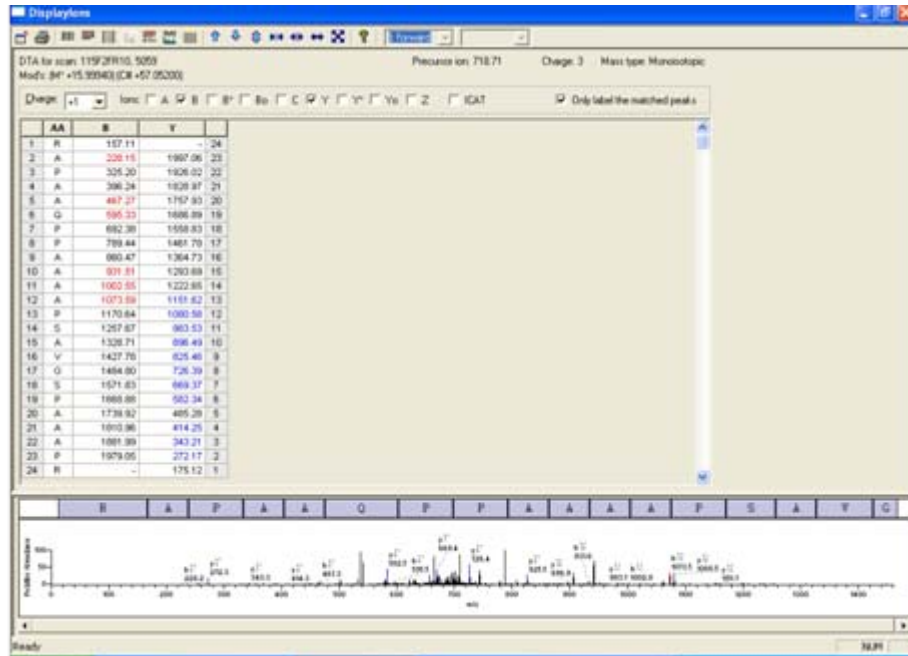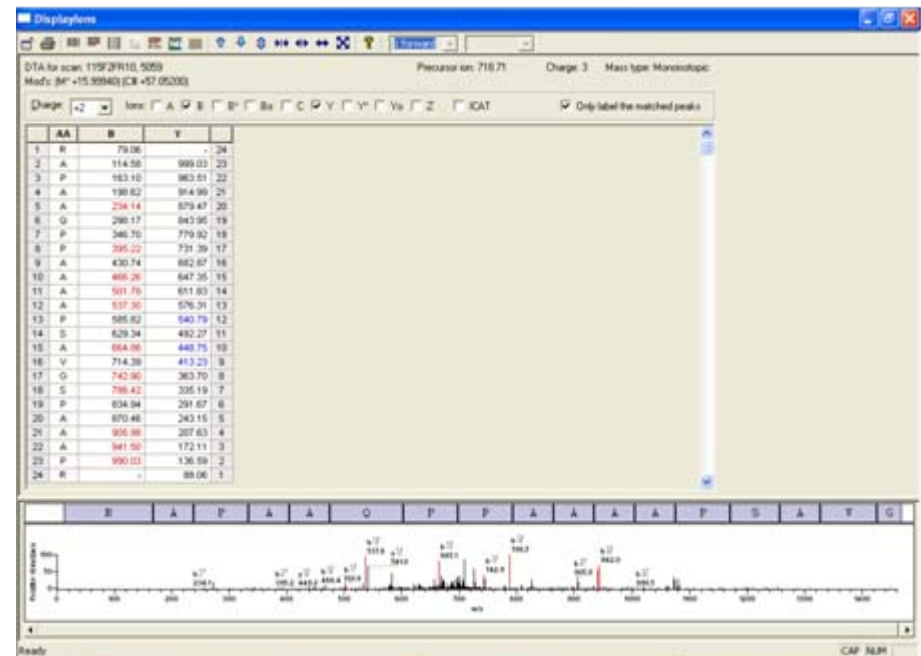

RRAPAAQPPAAAAPSAVGSPAAPRQ  
 IPI00284925.3, IPI00407413.1

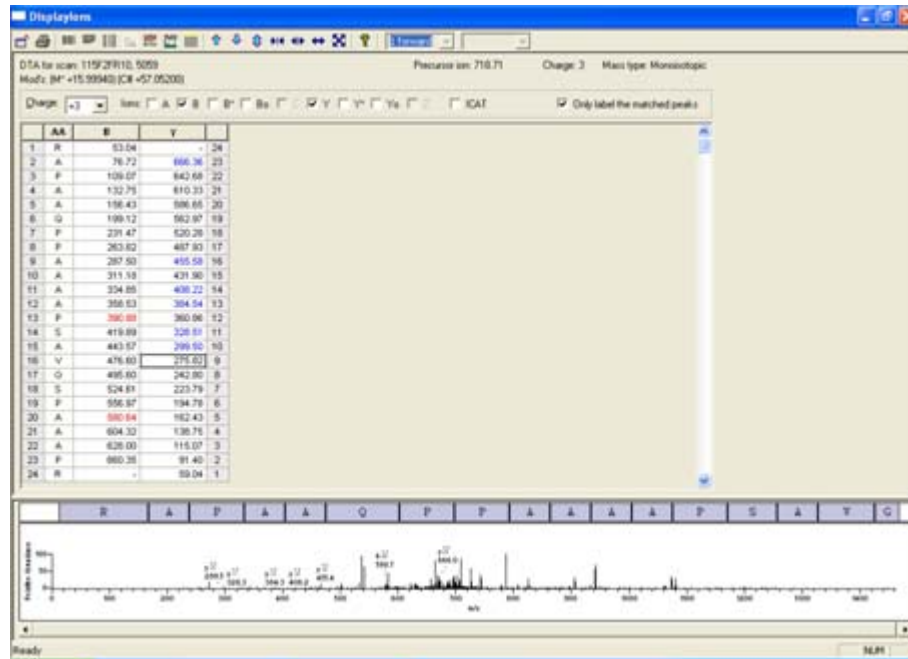

# RSAAESISESVPVGPVK

## IPI00113214.1

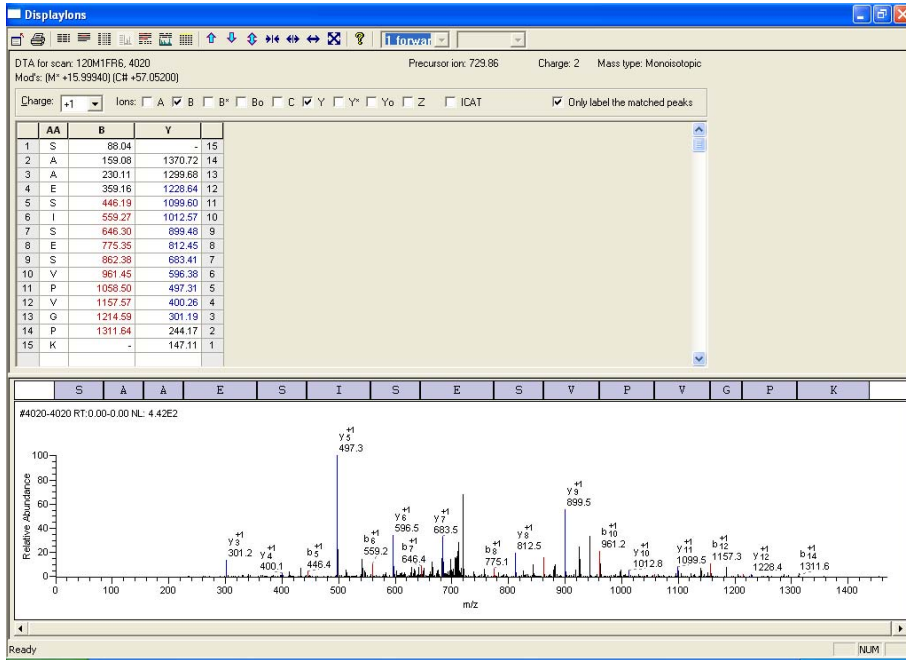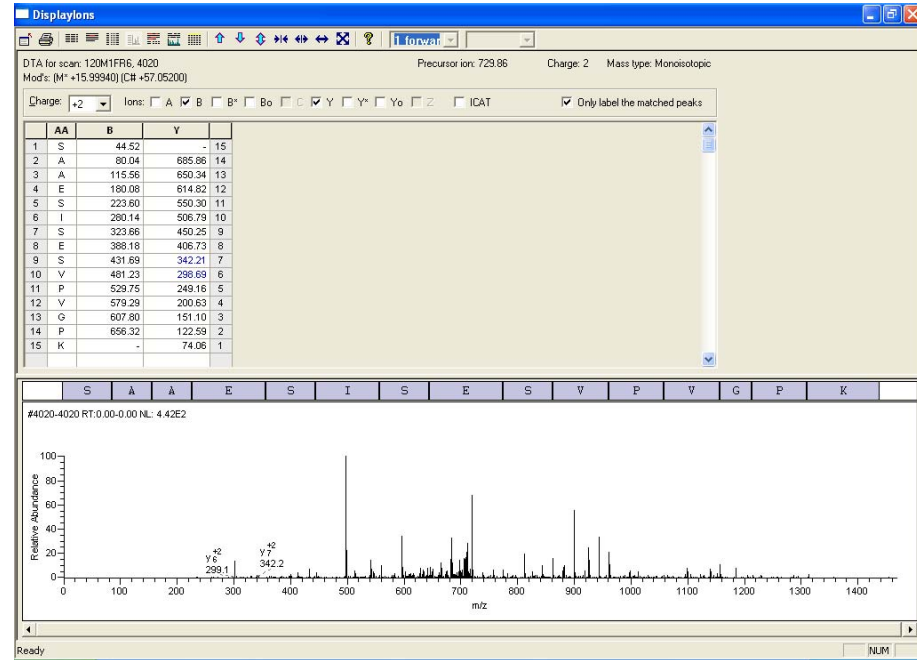

# RSIYGEEFEDENFILKH IPI00625013.2

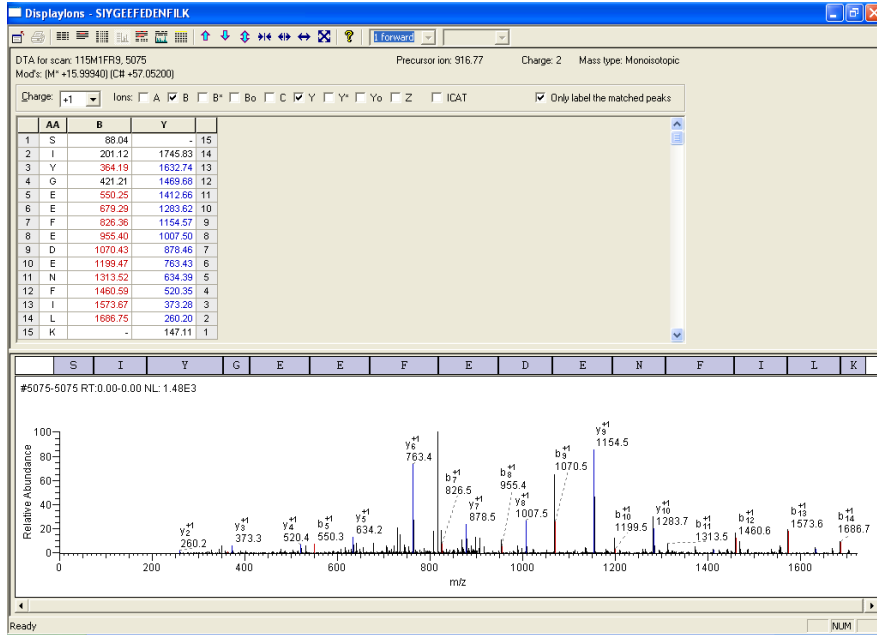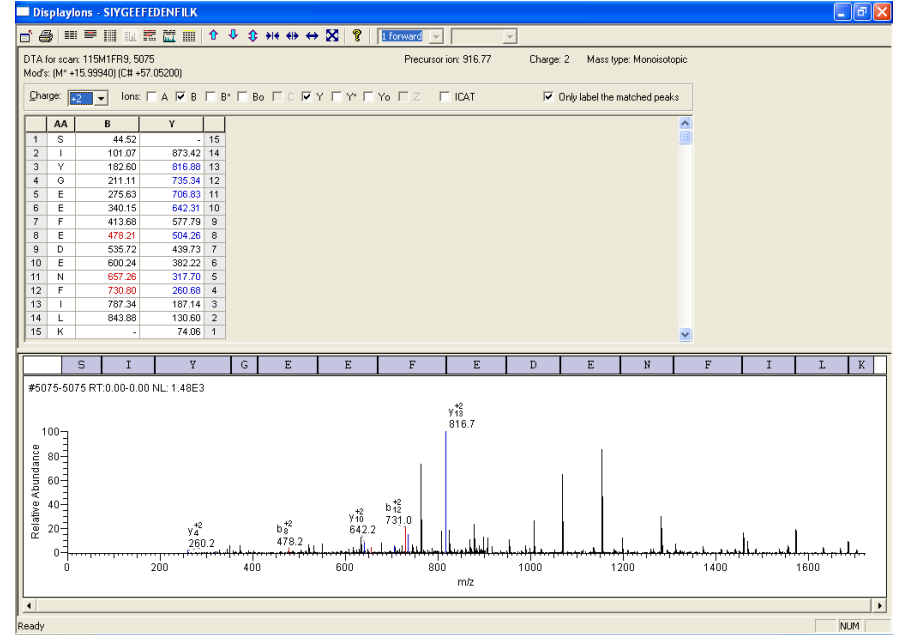

# RSLDLSIIAEVKA

IPI00131366.4, IPI00131368.2, IPI00139301.3, IPI00221797.1, IPI00330480.1,  
IPI00470126.3, IPI00762364.1

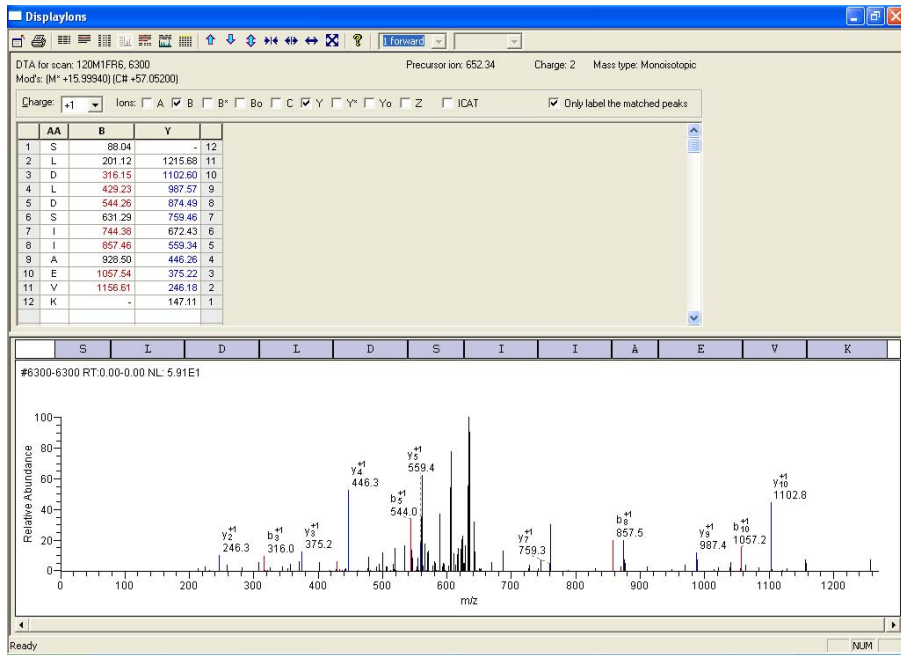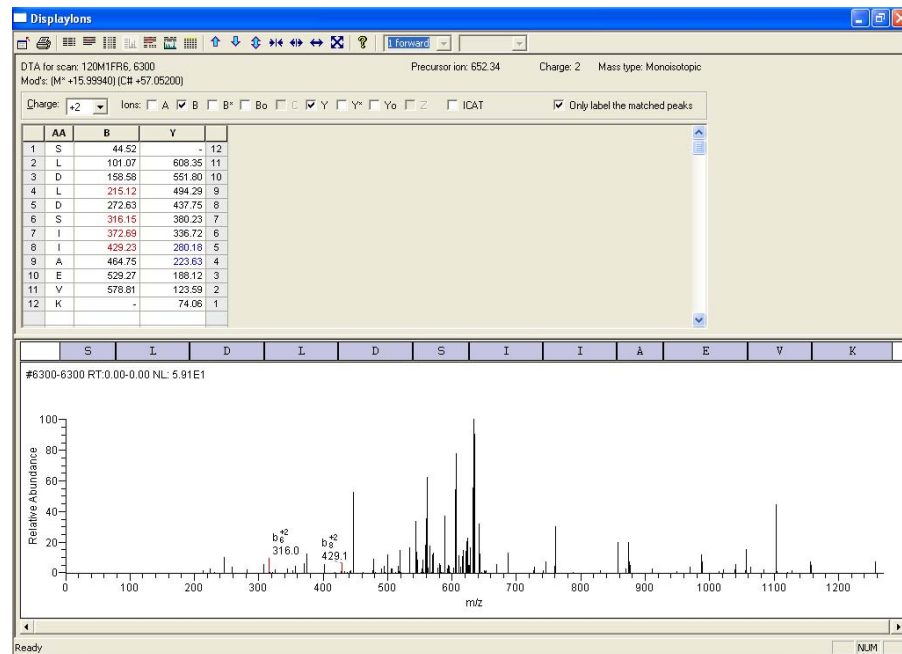



# RSLFSSIGEVS AKL

## IPI00108271.1, IPI00466032.2

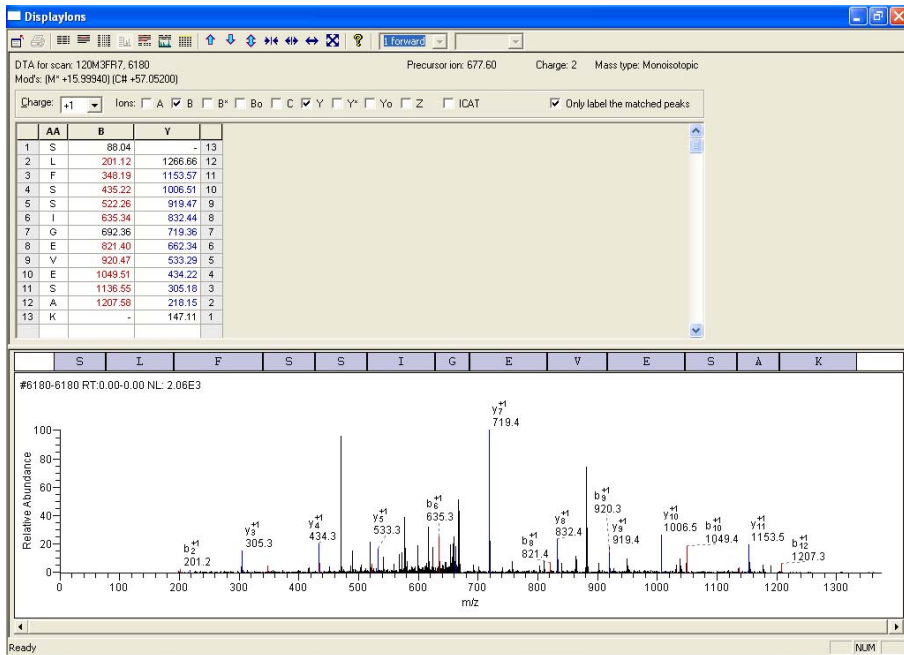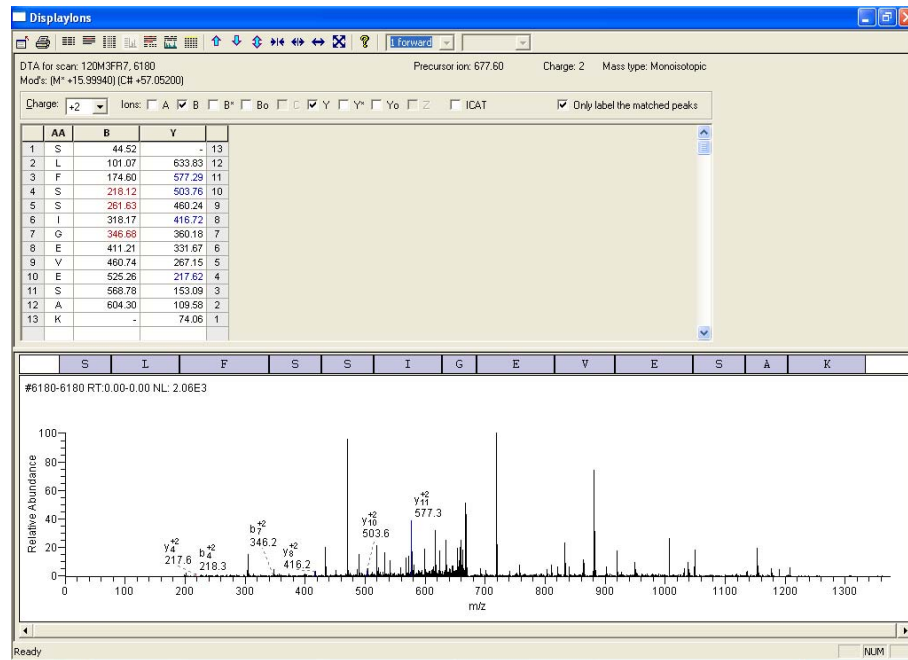

# RSSGSPYGGGYGSGGGSGGGYGSRR

IPI00269661.1, IPI00269662.1, IPI00459722.2, IPI00461800.1, IPI00466185.3,  
 IPI00470076.5, IPI00659723.1, IPI00660502.1, IPI00663550.1, IPI00664047.1,  
 IPI00664791.1, IPI00667787.1, IPI00668954.1, IPI00670004.1, IPI00670189.1,  
 IPI00670681.1, IPI00670732.1, IPI00674712.1, IPI00675624.1, IPI00675934.4,  
 IPI00677689.2, IPI00677959.1, IPI00678360.2, IPI00749630.1, IPI00749895.1,  
 IPI00750059.1, IPI00750428.1, IPI00751134.1, IPI00751584.1, IPI00752179.1,  
 IPI00753691.1, IPI00754589.1, IPI00754734.1, IPI00755861.1, IPI00756768.1,  
 IPI00757273.1, IPI00757339.1, IPI00757344.1, IPI00757731.1

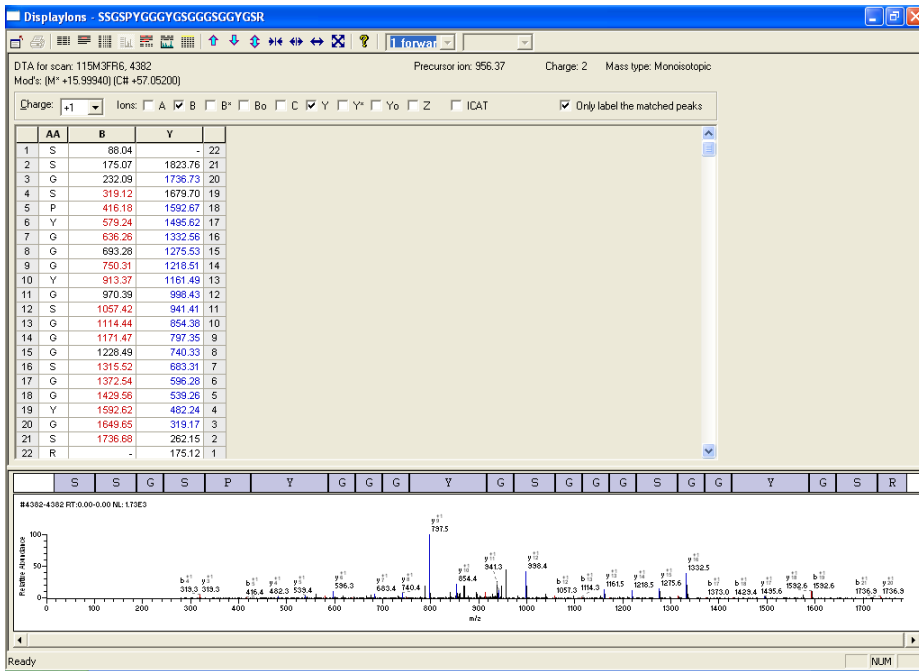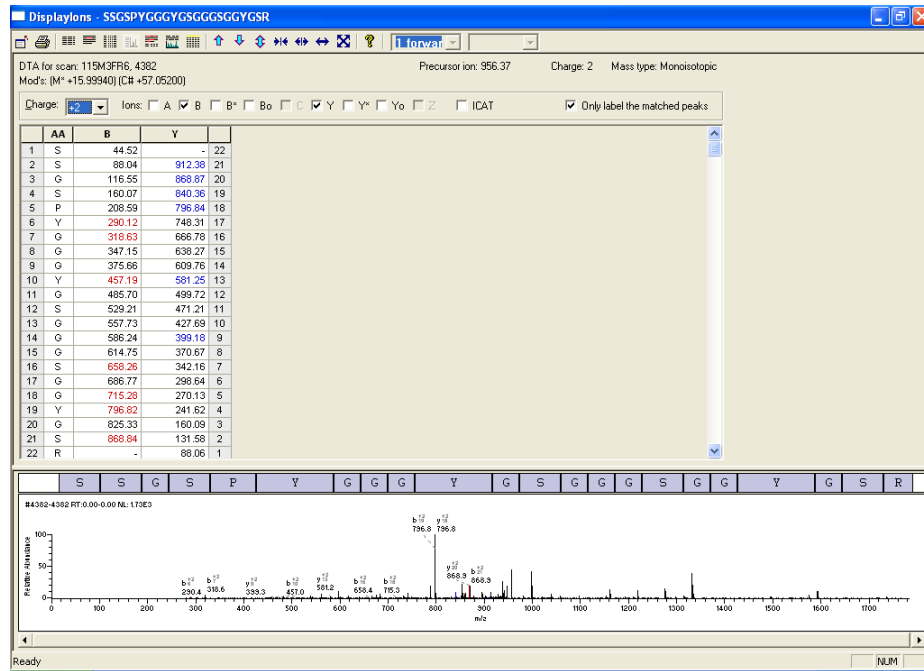

# RSTGEAFVQFASQEIAEKA

IPI00108143.1, IPI00133916.2, IPI00224729.1, IPI00378188.5

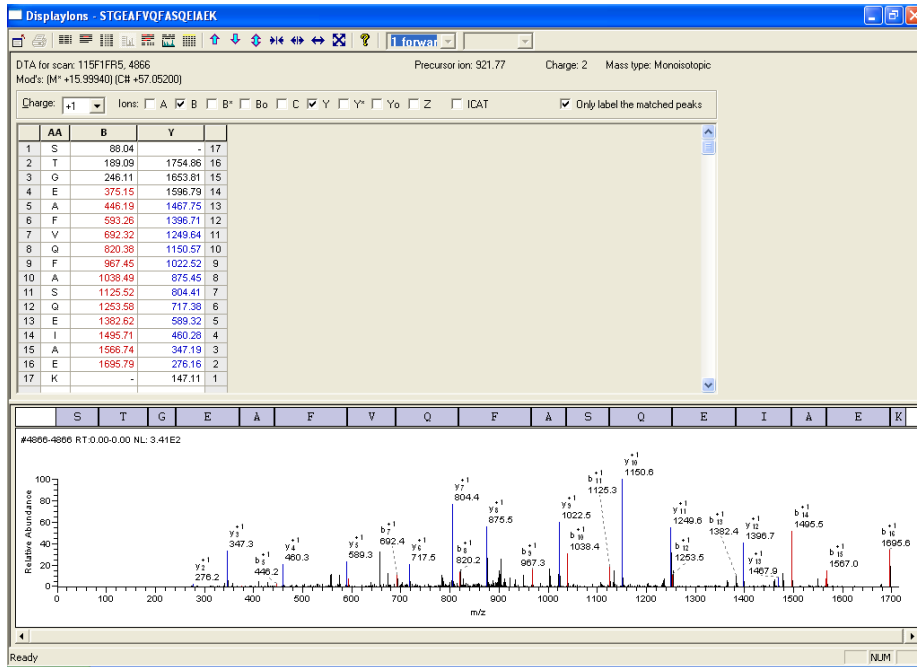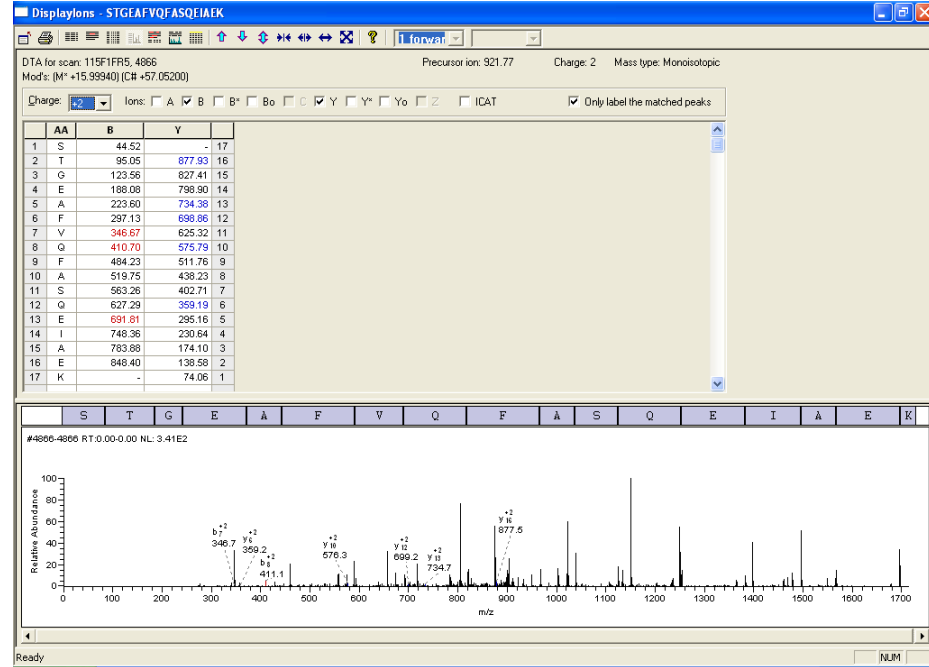

# RSVGDGETVEFDVVEGEKG

IPI00120886.2, IPI00121311.1, IPI00131034.1, IPI00274739.1, IPI00330591.1,  
IPI00474439.1, IPI00553286.2, IPI00647981.2, IPI00753114.1

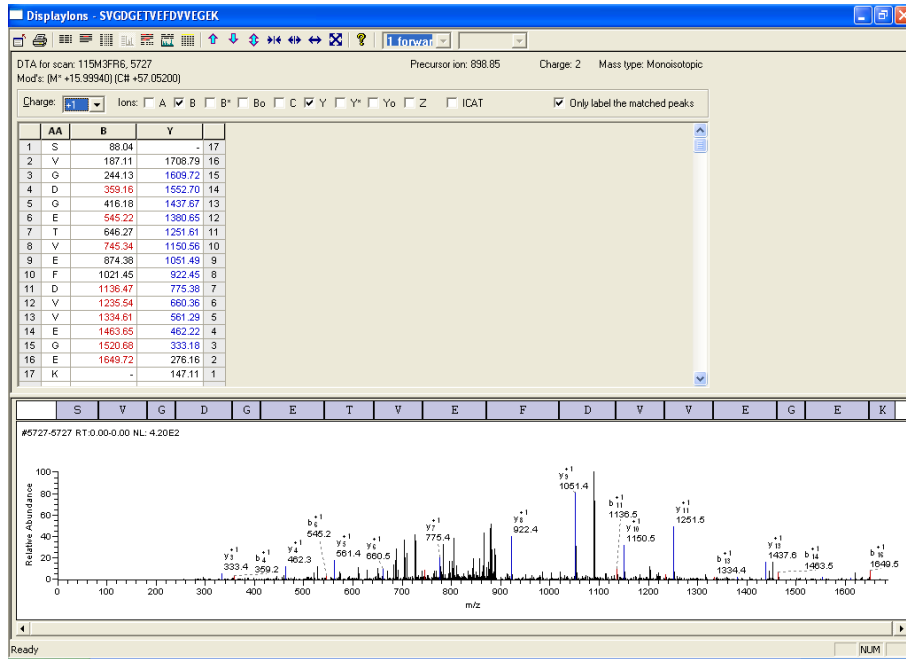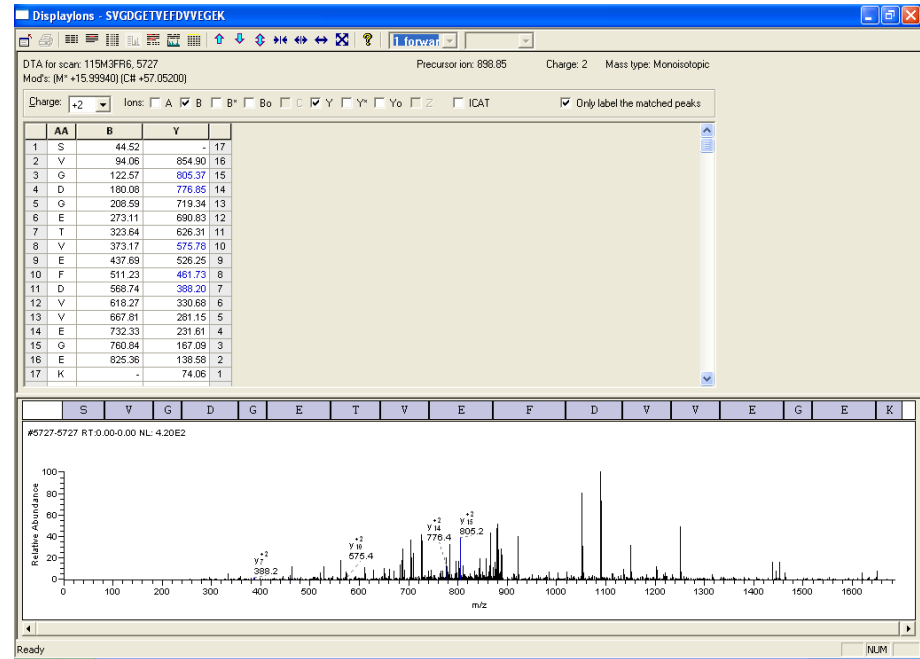

# RSVTQQPGSEVIAPQKT IPI00130353.4

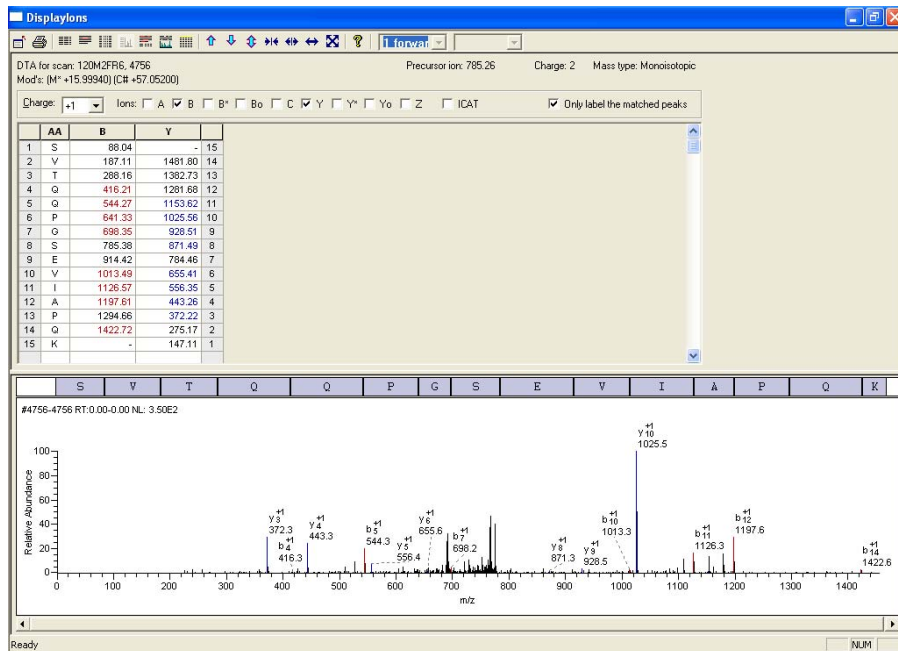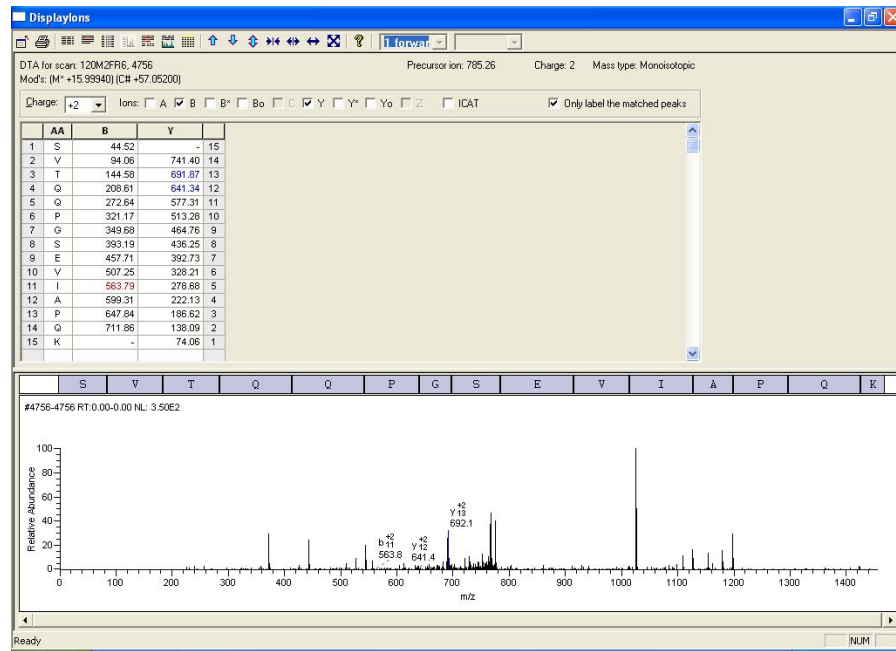

# RTALVSADGEEVAVKA

## IPI00113886.1, IPI00126191.5

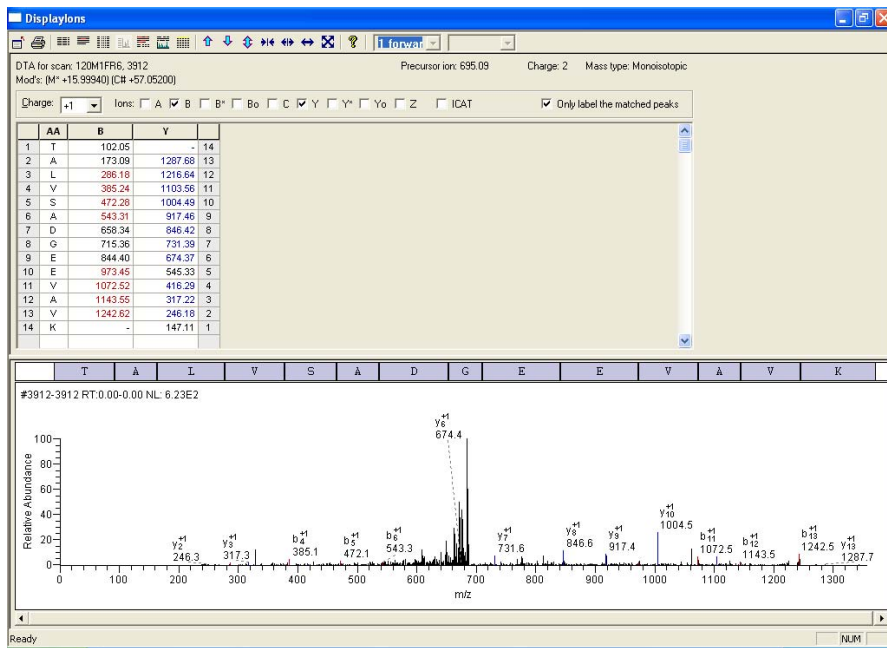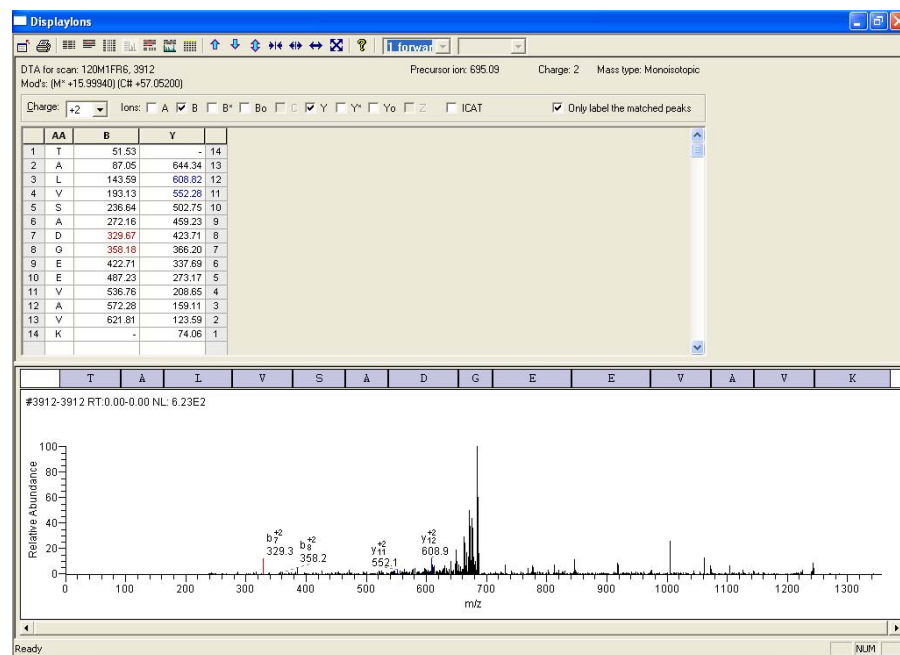

# RTDDPLLQLLQKA IPI00459280.2

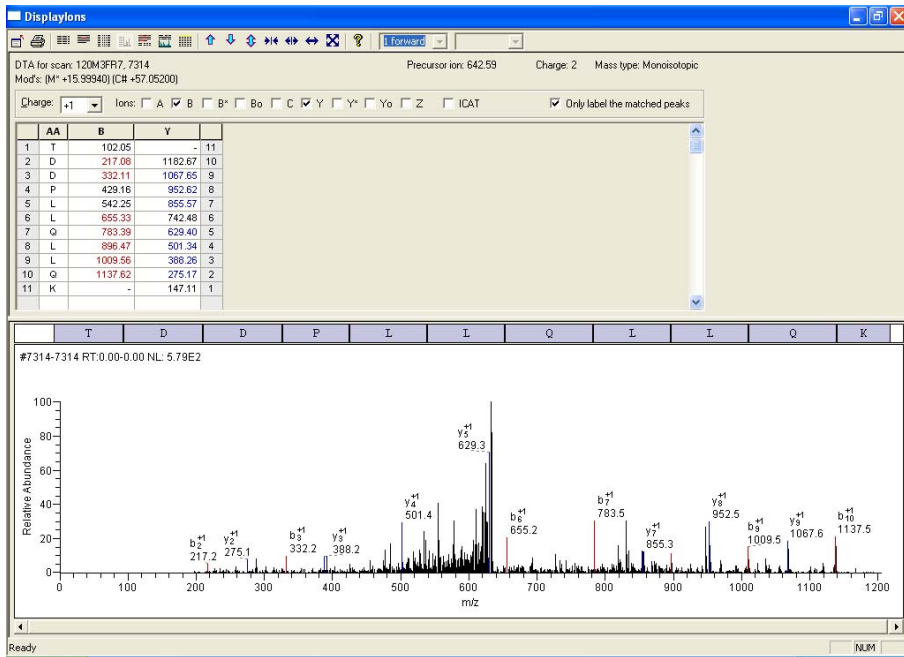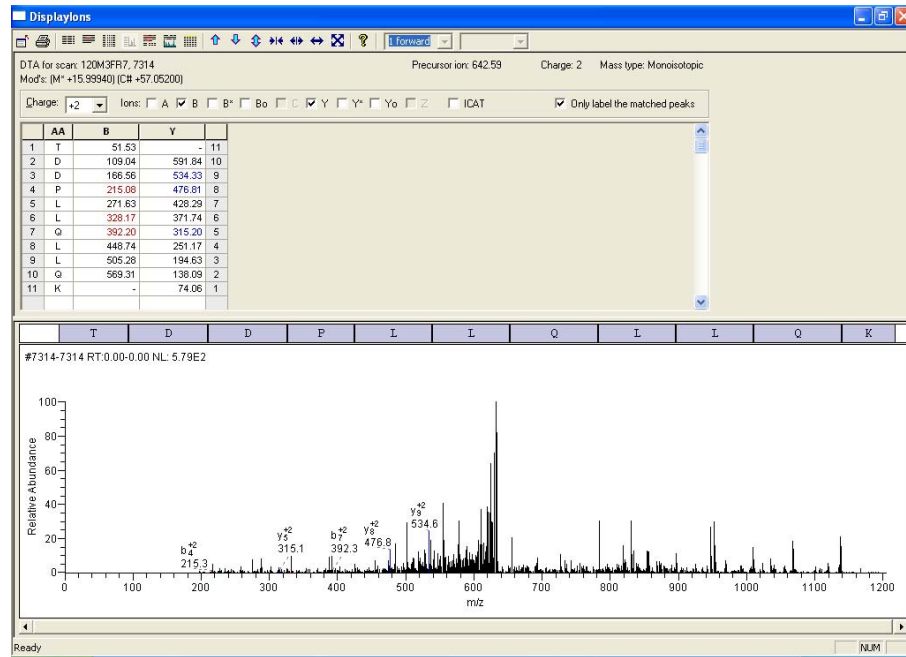

# RTDEQALLSSILAKT IPI00315187.5

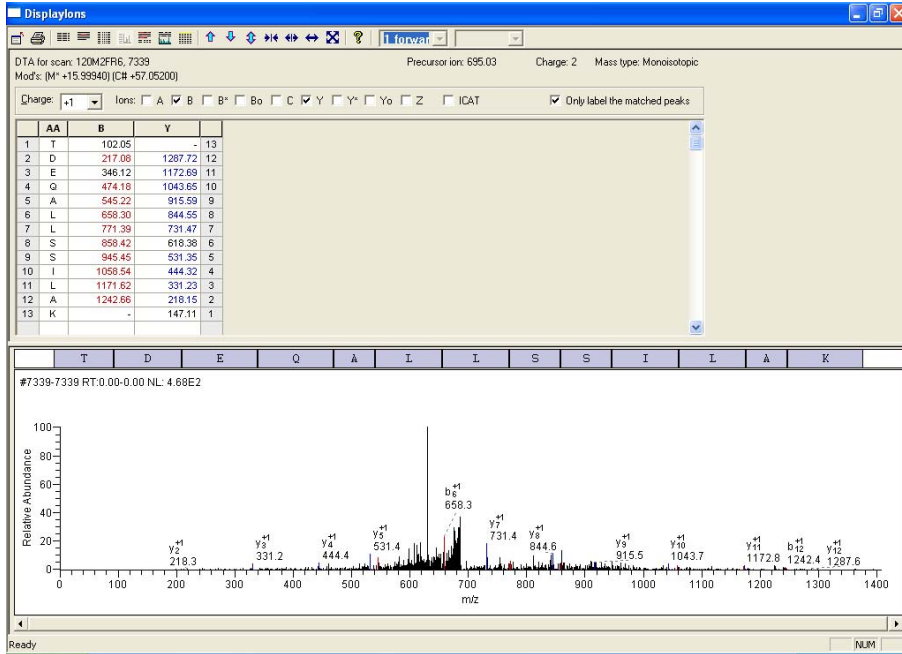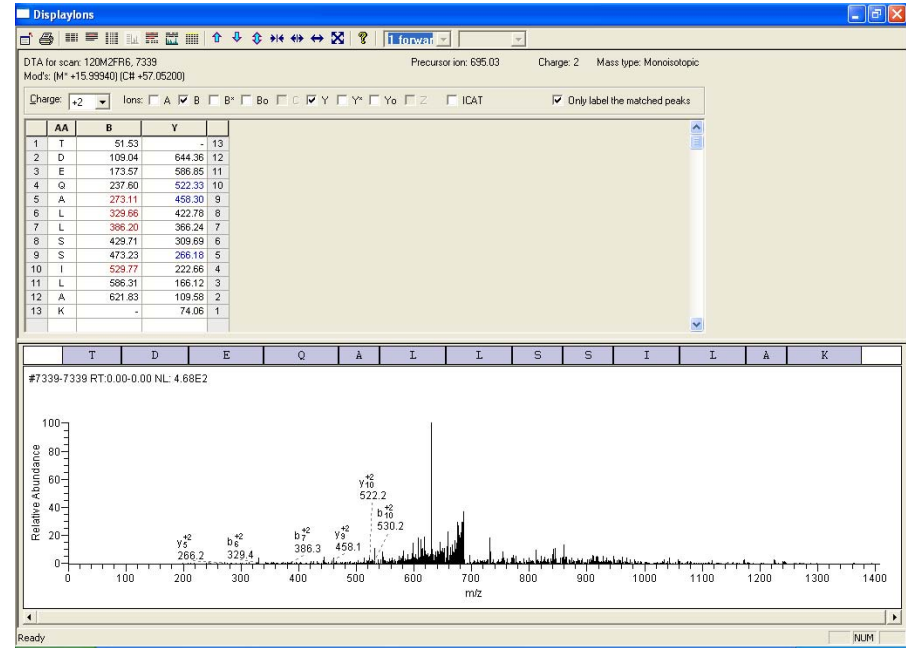



# RTDGLVSLTTSKD IPI00265025.5

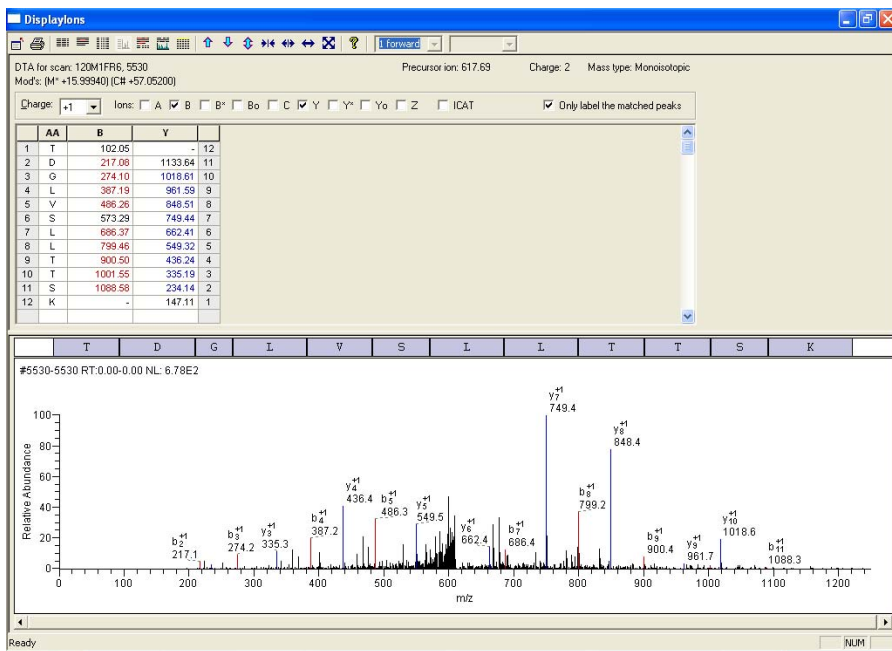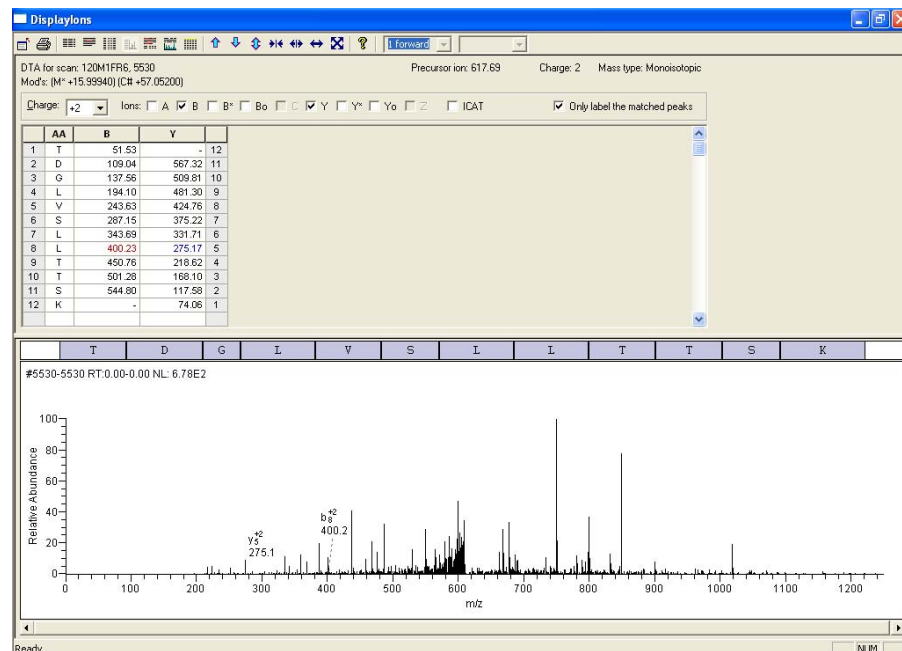

# RTEPTAQQNLALQLAEKL

## IPI00321647.2, IPI00752459.1

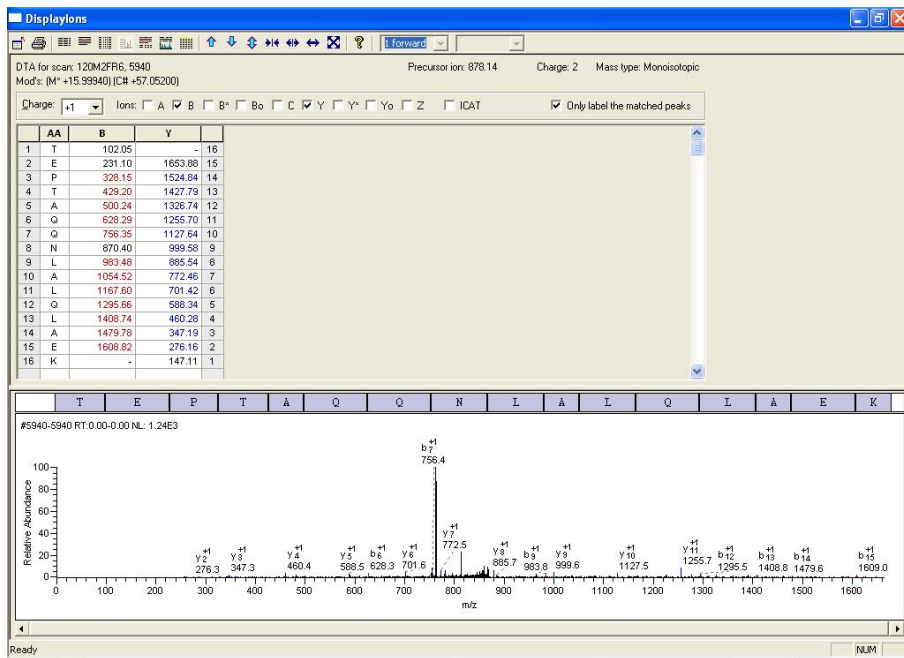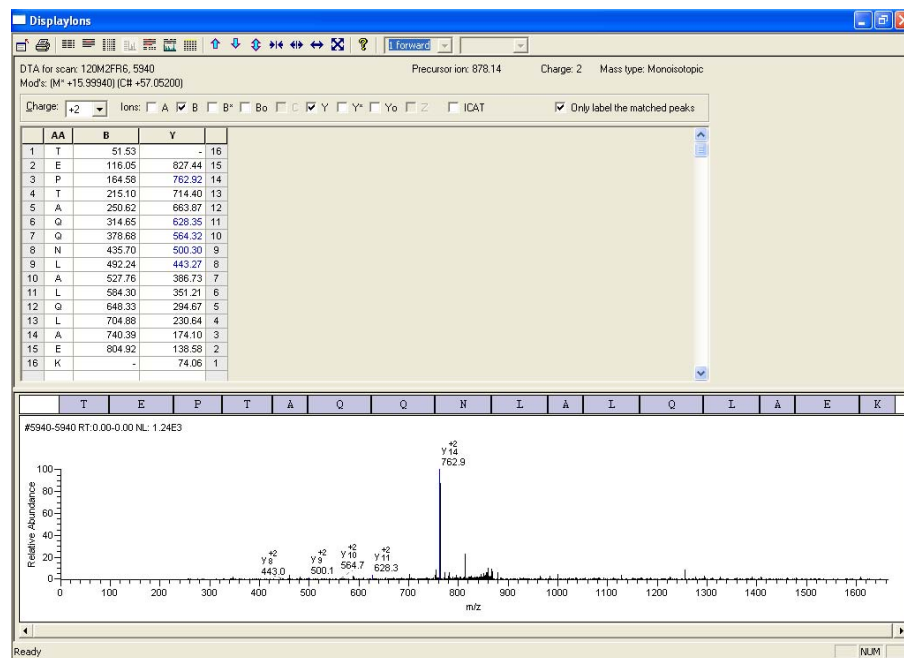

# RTFIAIKPDGVQRG

IPI00127417.1, IPI00131459.1, IPI00408489.1, IPI00551485.1, IPI00649586.1

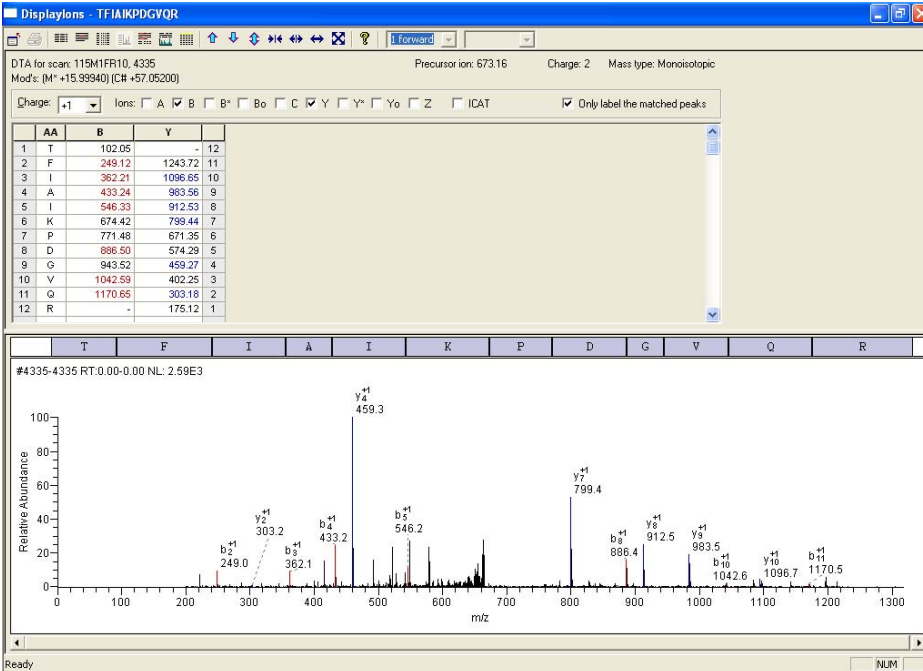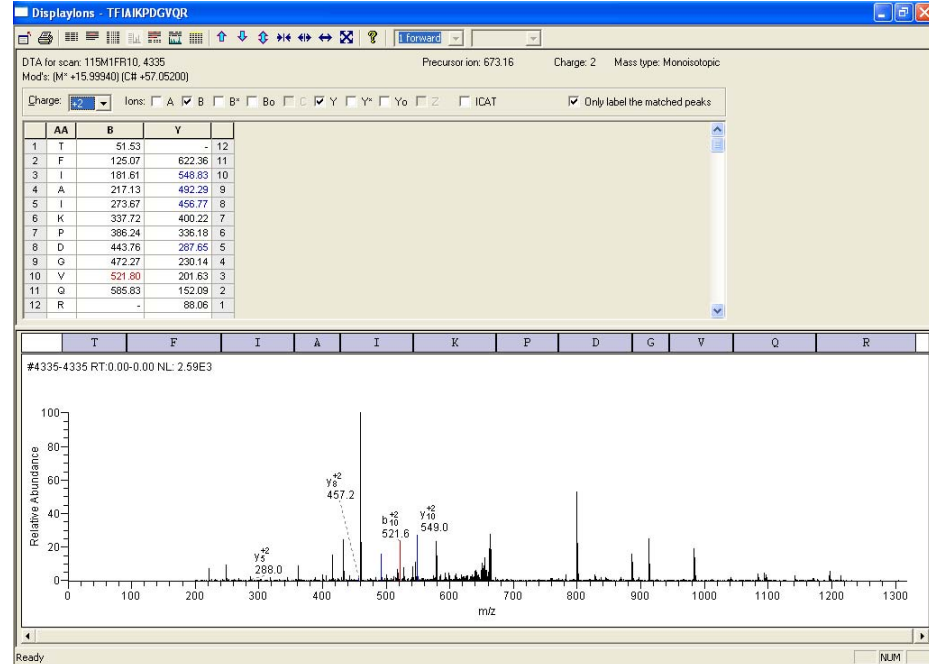

# RTGSESSQTGASATSGRN IPI00221581.1, IPI00756192.1

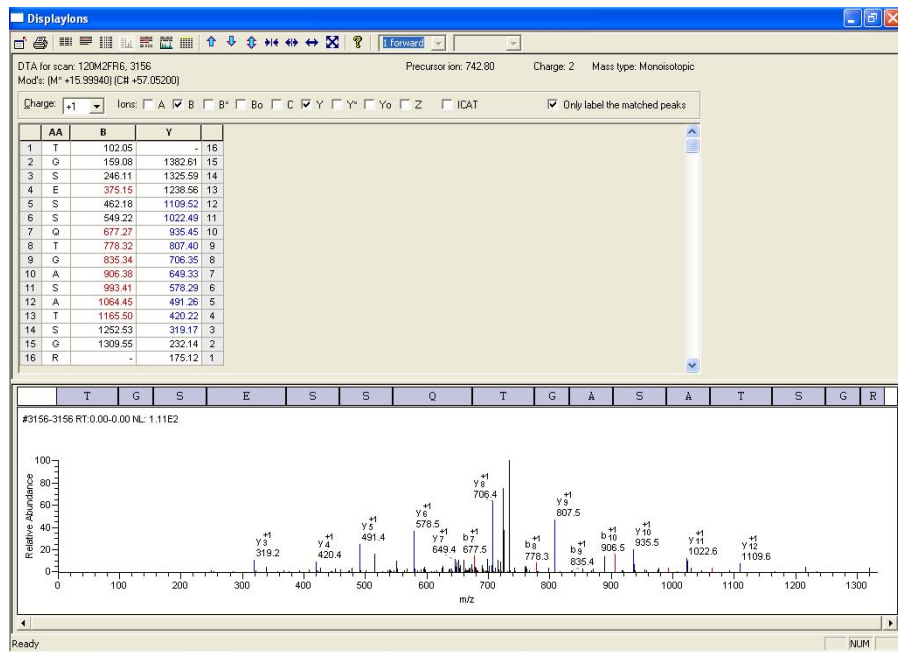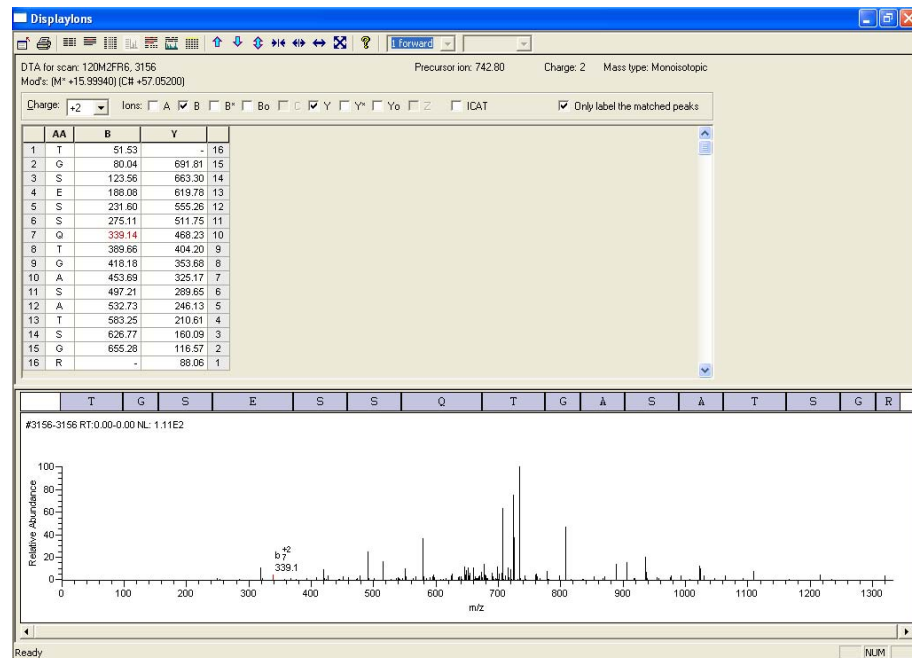

# RTNEKVELQELNDRF

## IPI00130102.3, IPI00227299.5

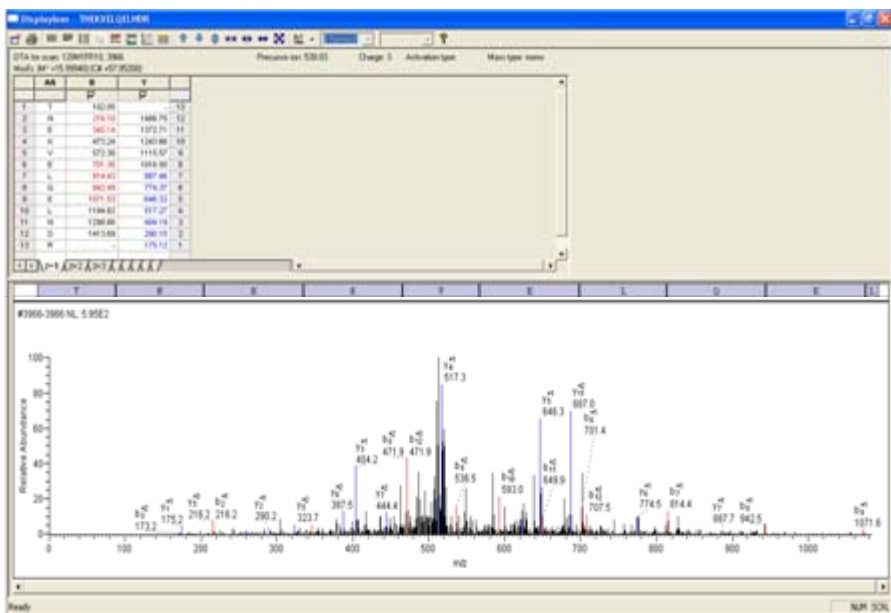

# RTNEKVELQELNDRF

## IPI00130102.3, IPI00227299.5

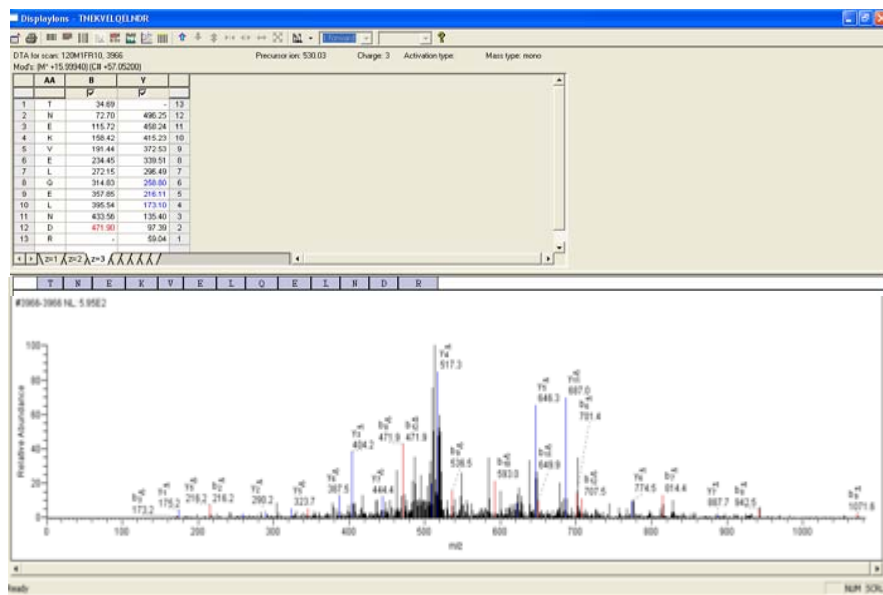

# RTTPSVVAFTADGERL IPI00133903.1

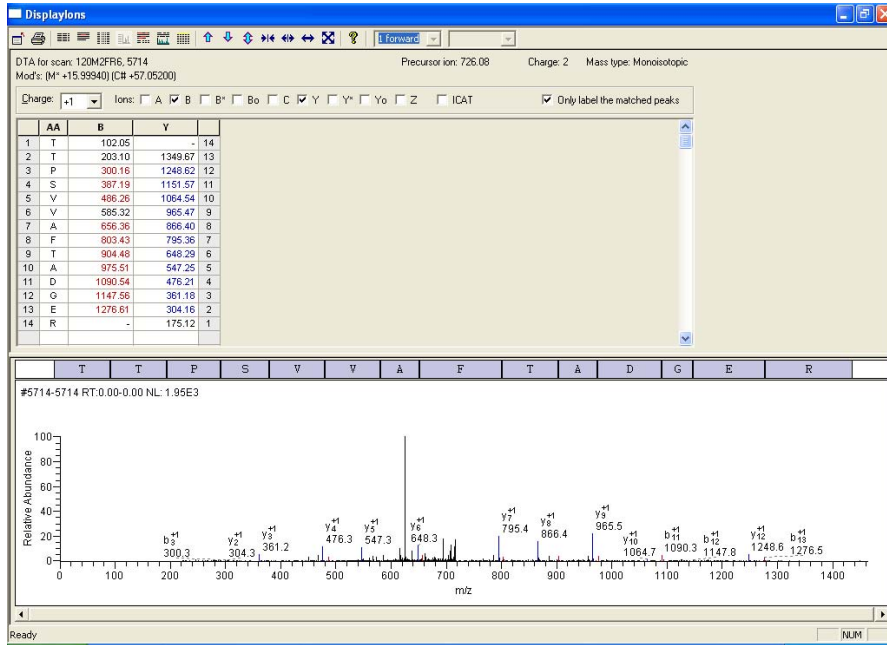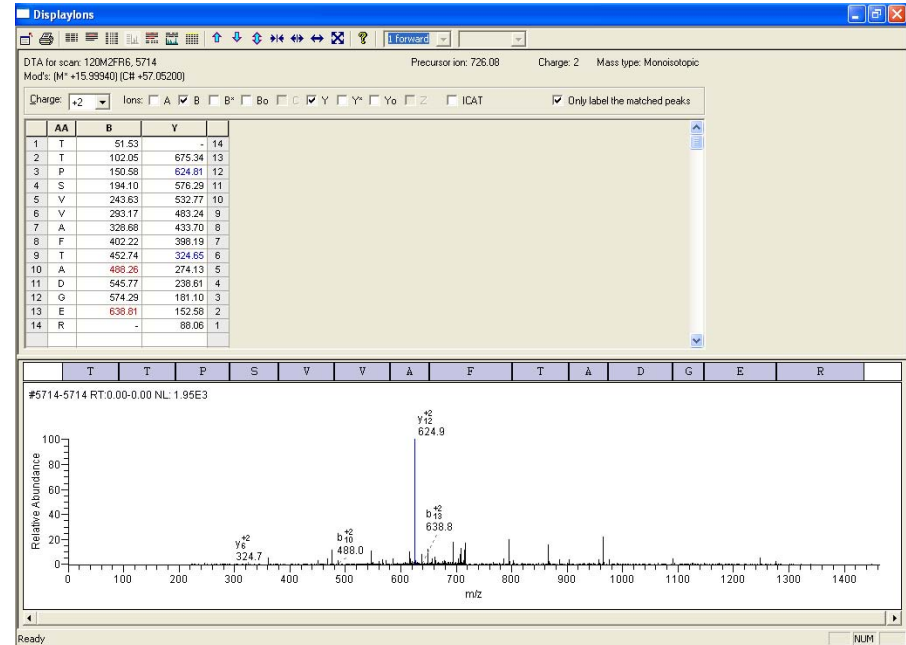

# RTVESEAASYLDQISRY

## IPI00113660.1, IPI00649191.1, IPI00762018.1

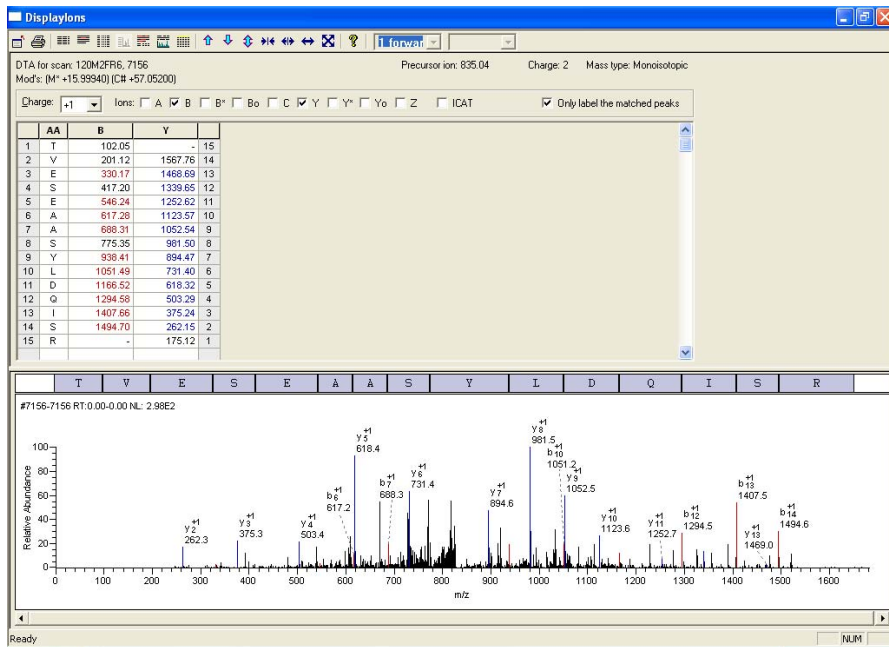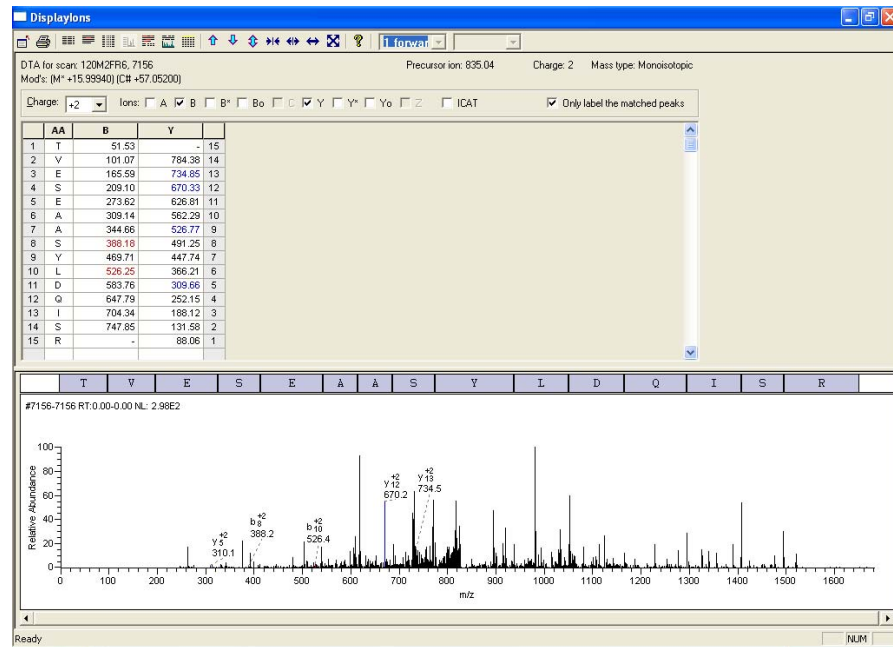



# RVAGTGEGGLEELVEELNSGKV

IPI00308222.3, IPI00378015.1, IPI00458127.1

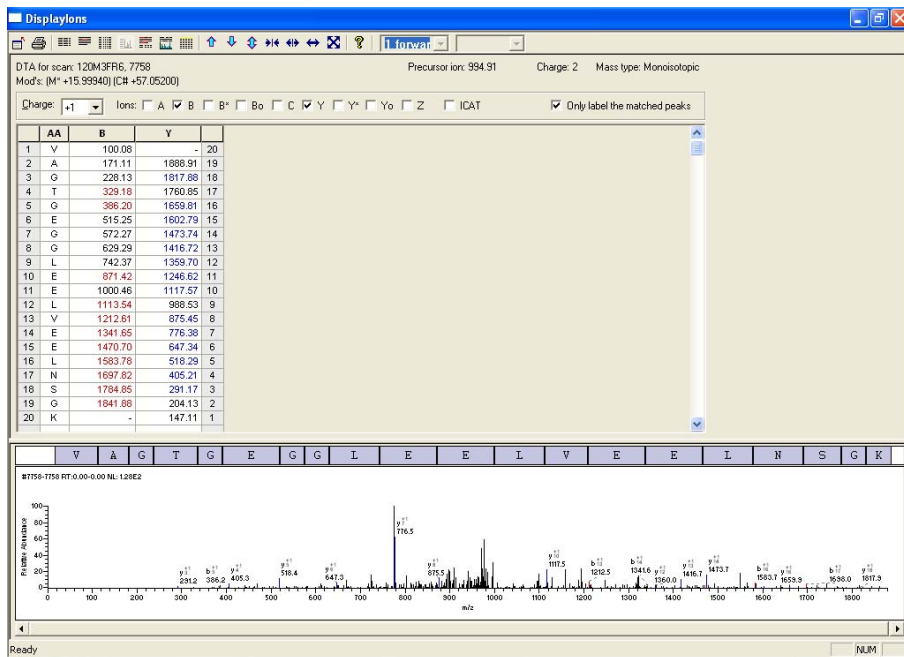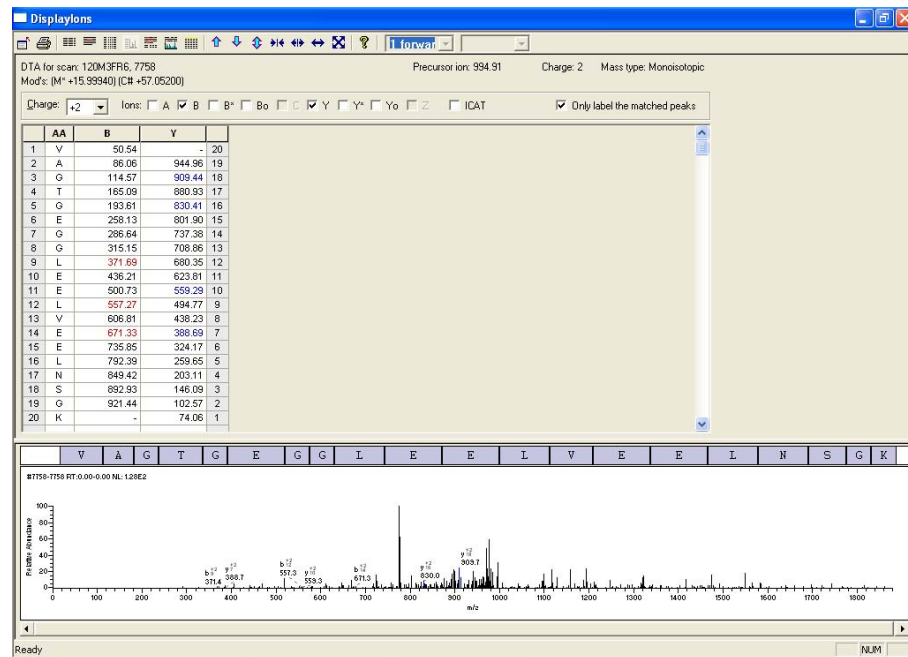

# RVAVSADPNVPNVIVTRL IPI00322312.2

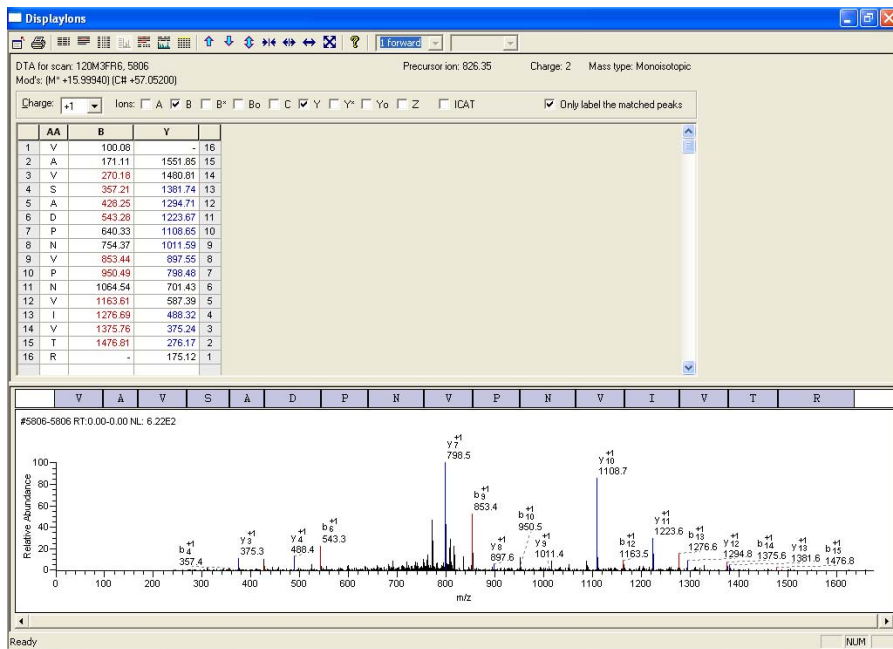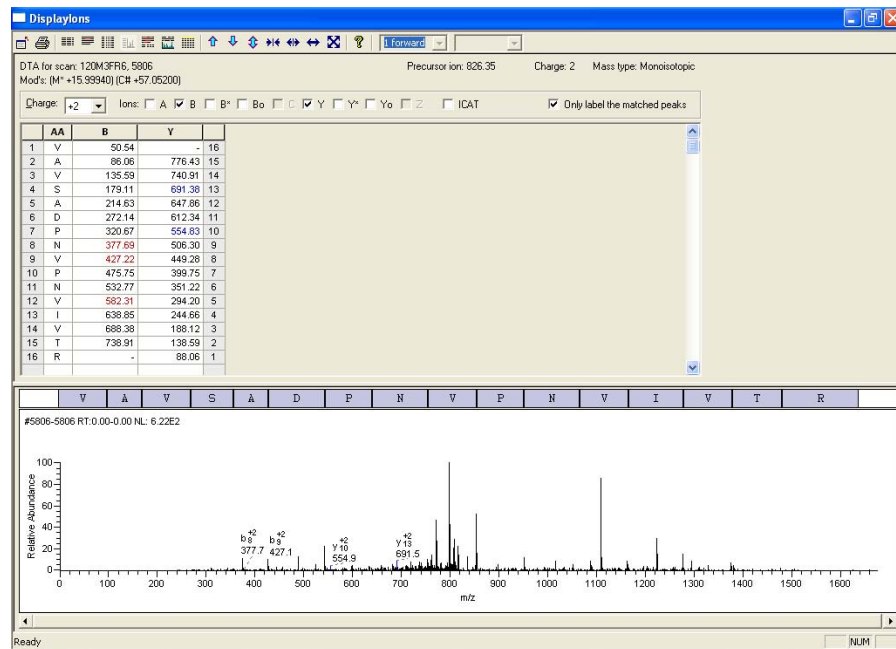

# RVEVTEFEDIKS

IPI00111560.3, IPI00347814.2, IPI00410883.1, IPI00468081.4, IPI00620705.3,  
IPI00620797.5, IPI00753486.1, IPI00754518.1, IPI00755712.1, IPI00755843.1

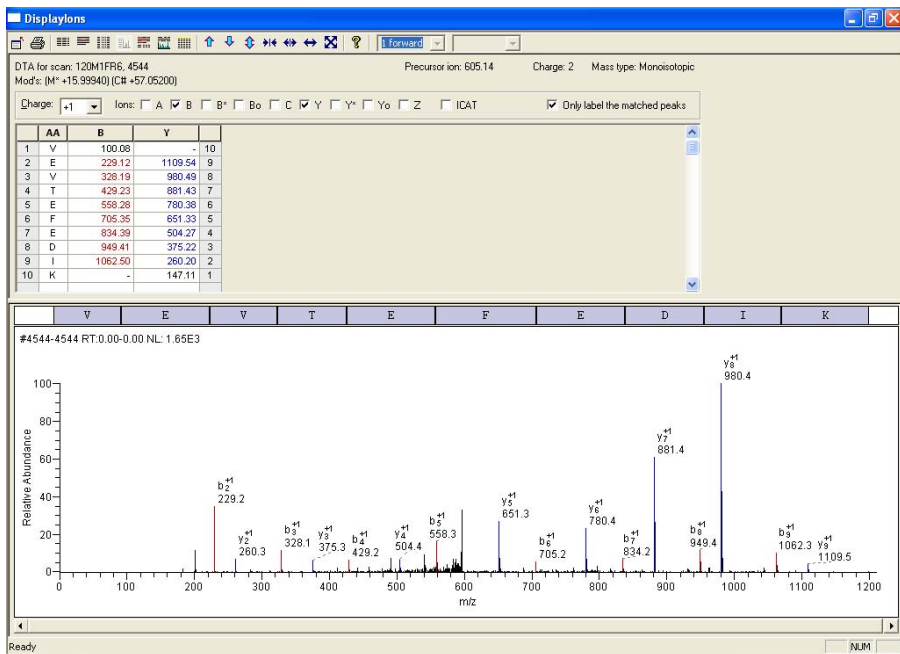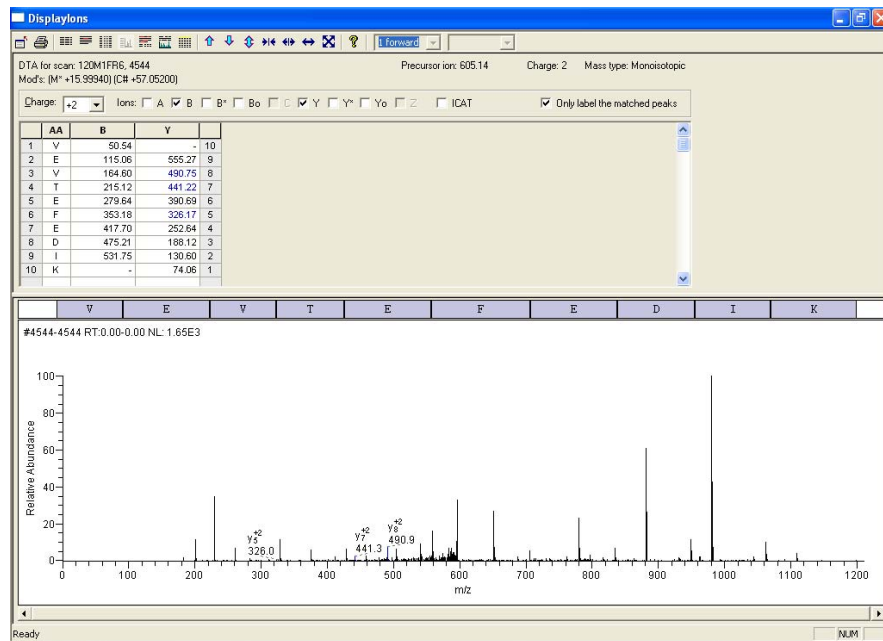

# RVFLDPNTLSDDGTVALRG

## IPI00132089.2, IPI00761930.1

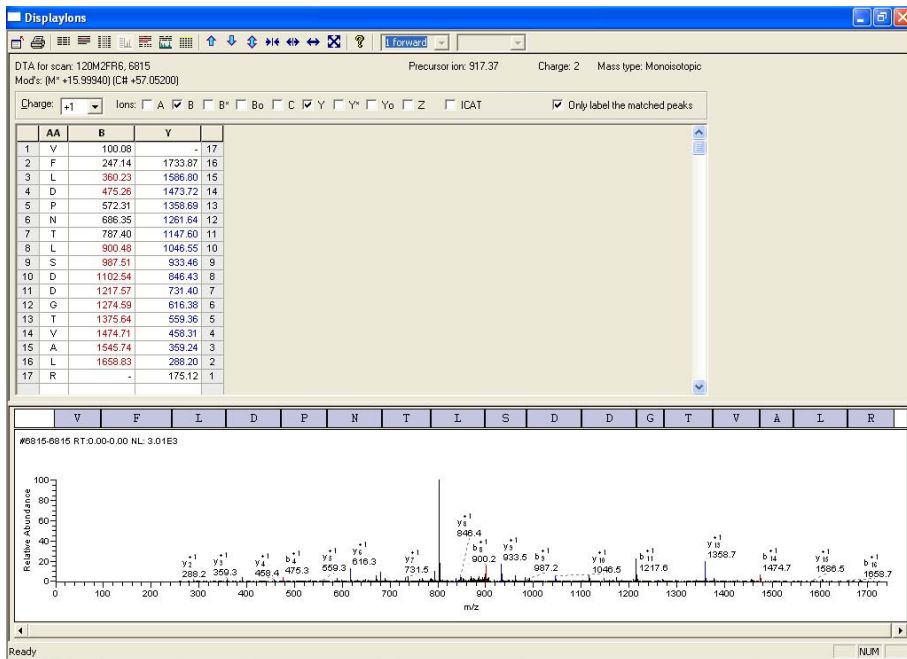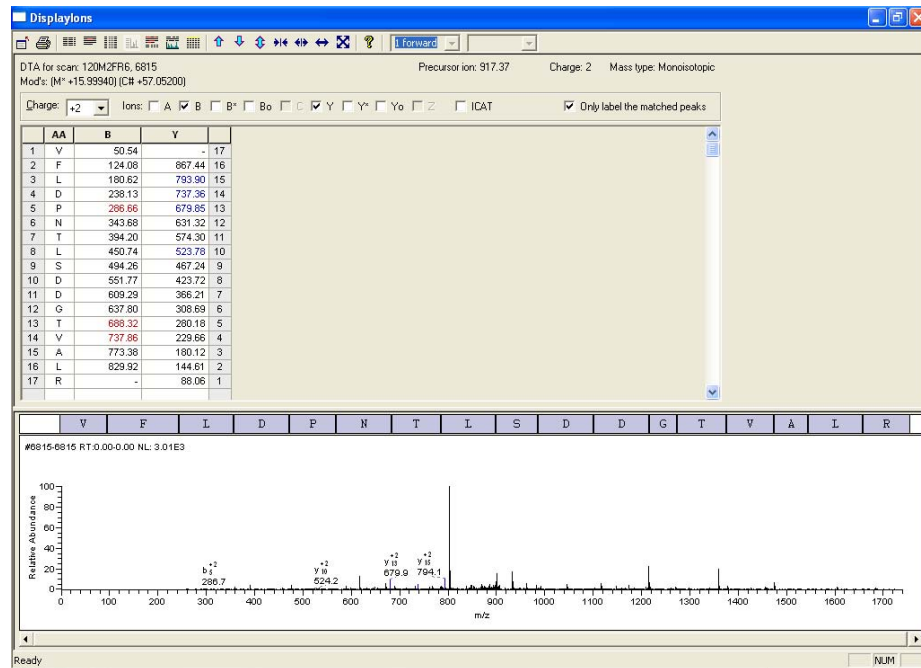

# RVGNLGLATSFFNERN

IPI00133708.1, IPI00134371.1, IPI00230035.6, IPI00752873.1

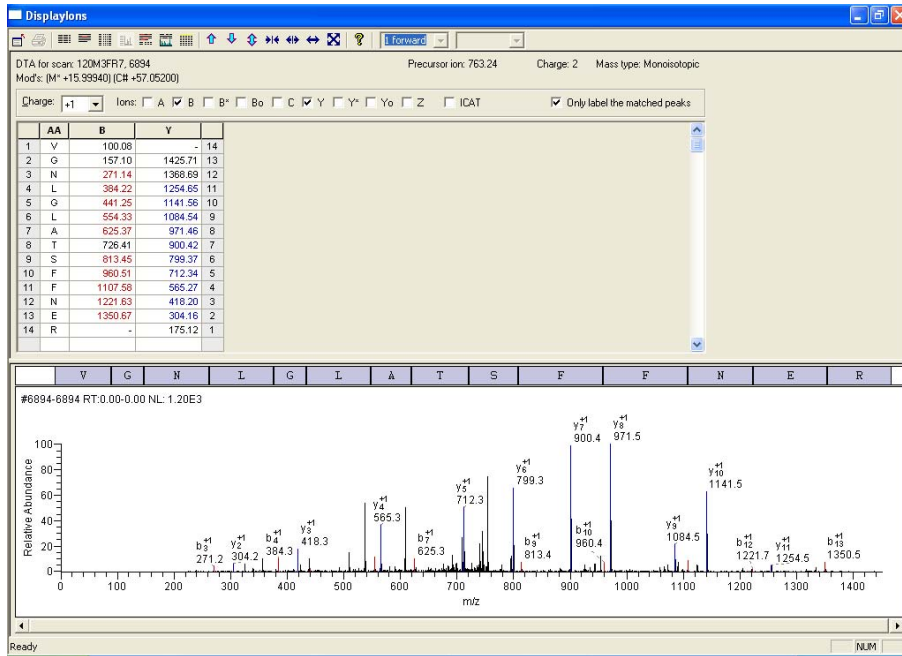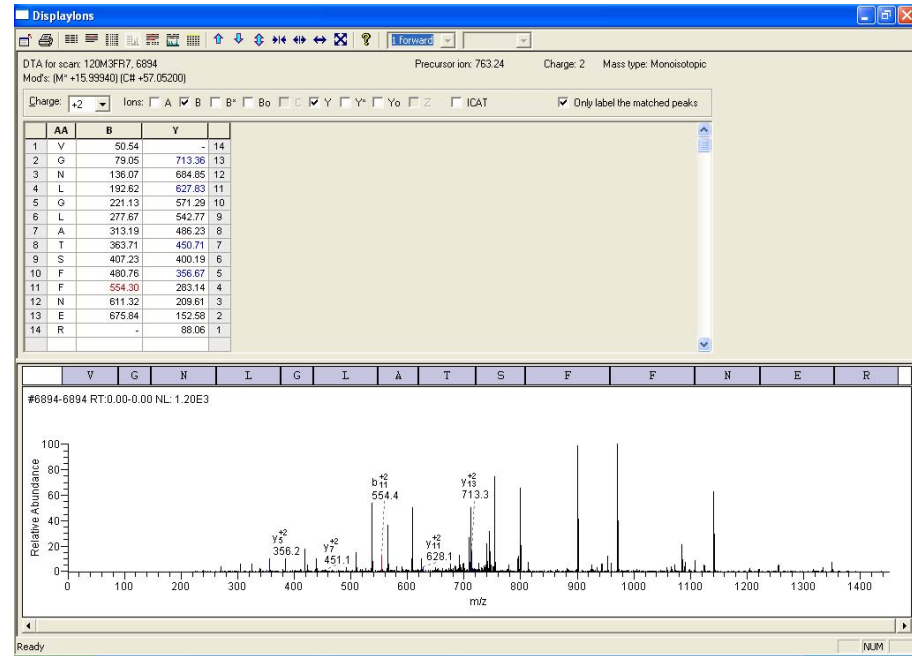

# RVISLSGEHSIIGRT

## IPI00130589.7, IPI00135857.3

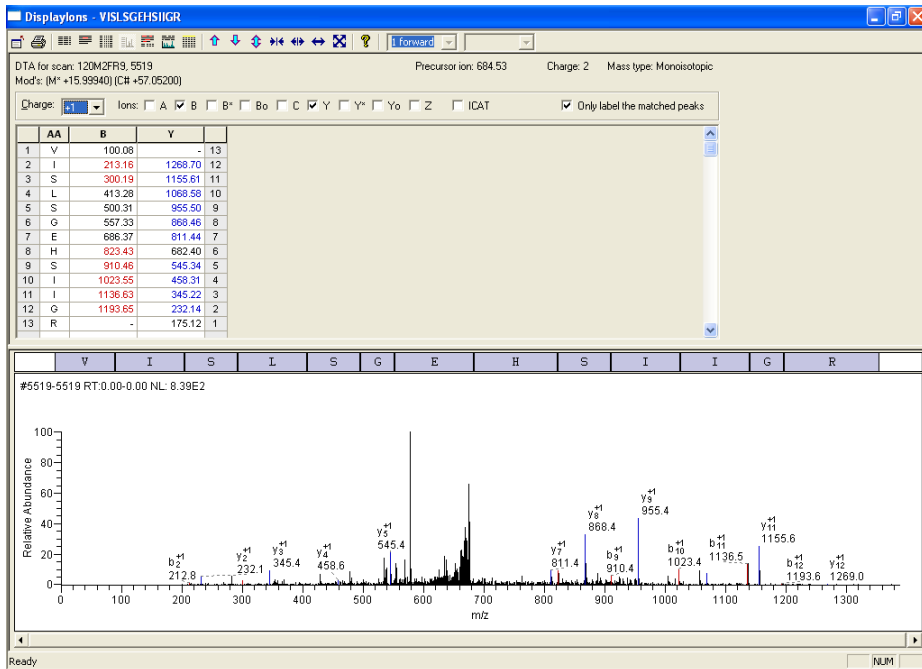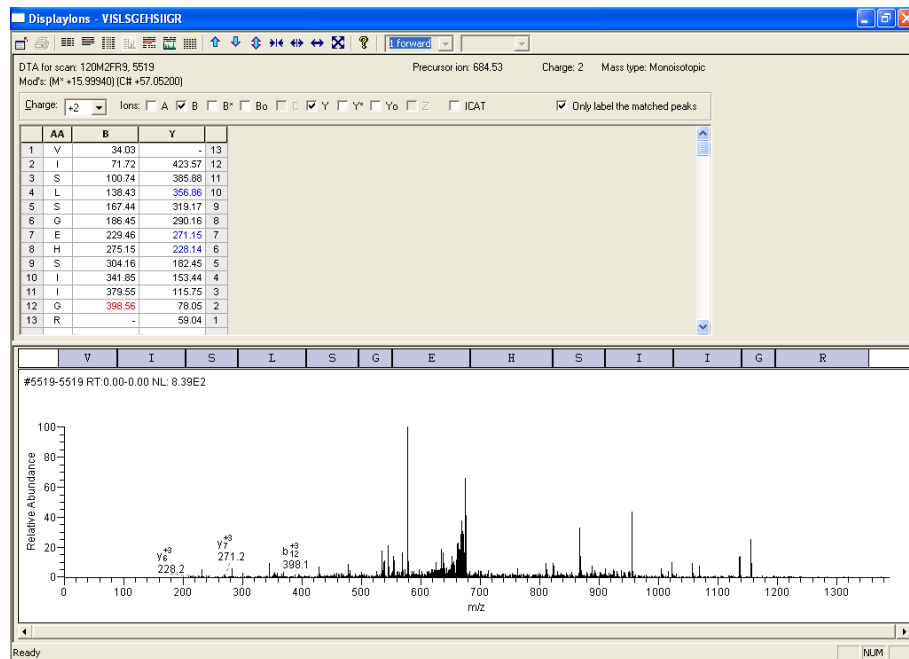

# RVPTPNVSVVDLTCRL IPI00108939.1, IPI00134521.1

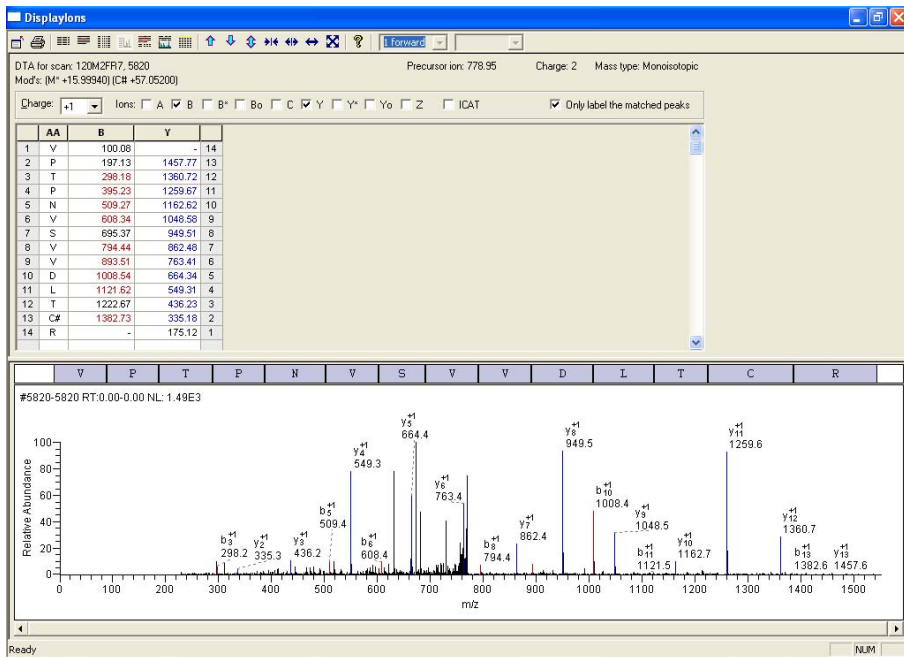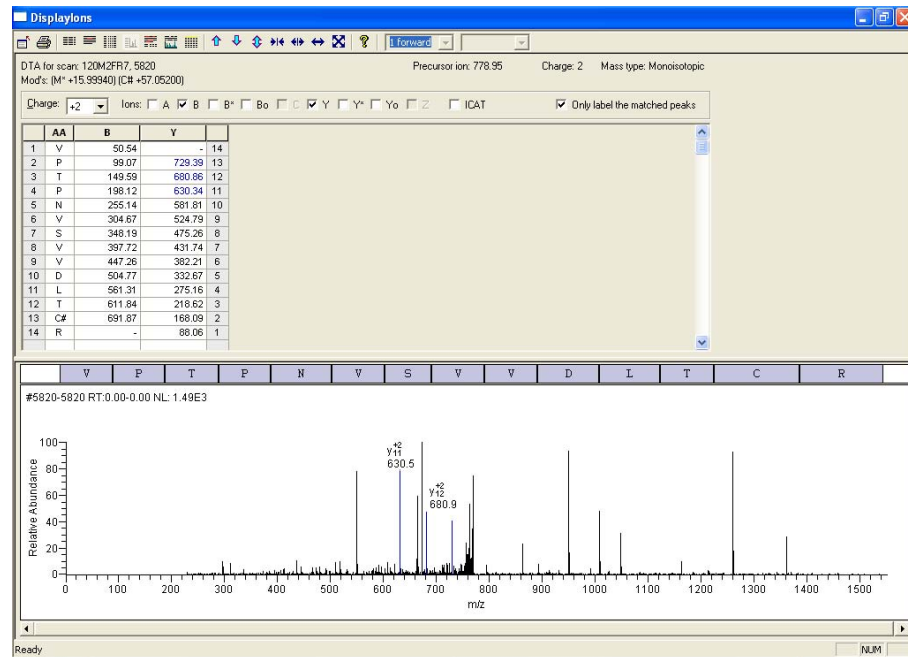

# RVPVENVLGEVGGGFKV

## IPI00331710.1, IPI00759881.1

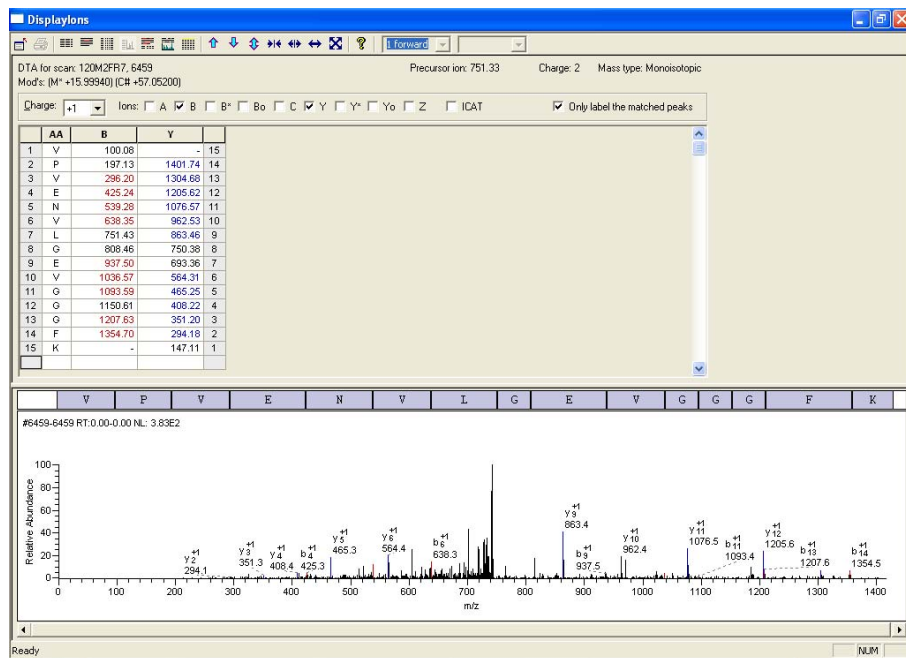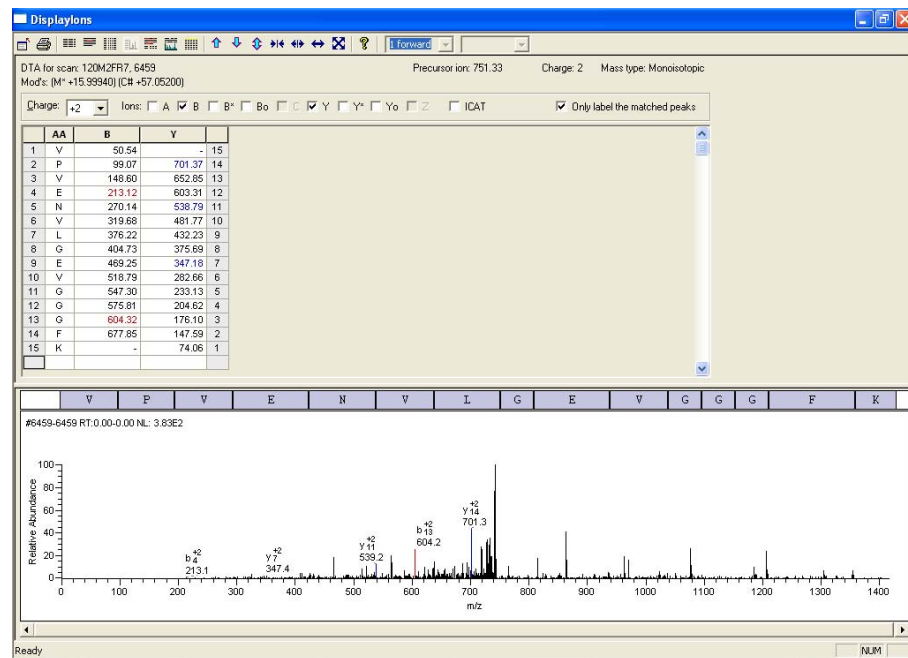



# RVREEVPLELVEAHVKK

IPI00125662.2, IPI00515361.1, IPI00752367.1

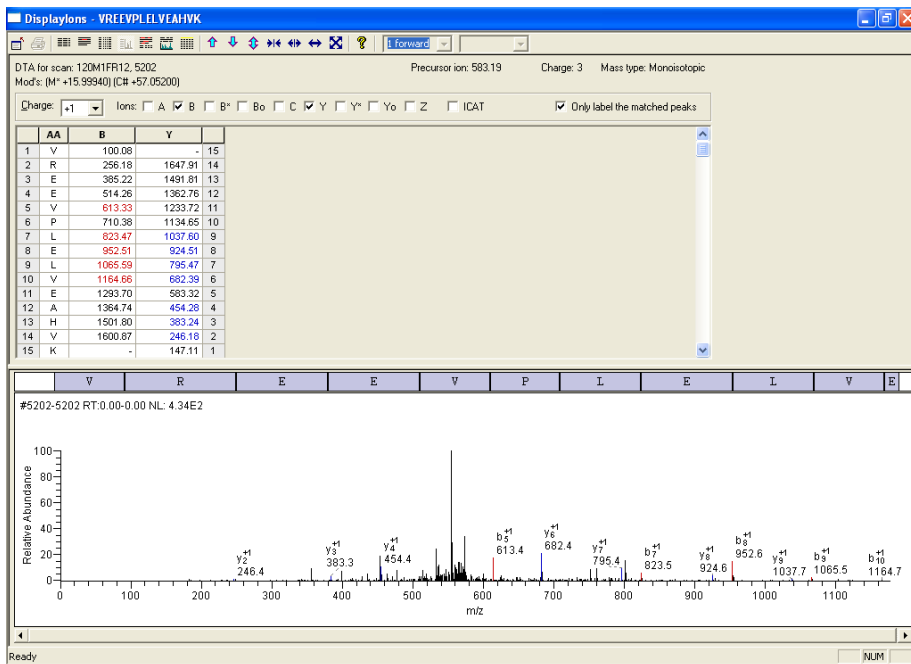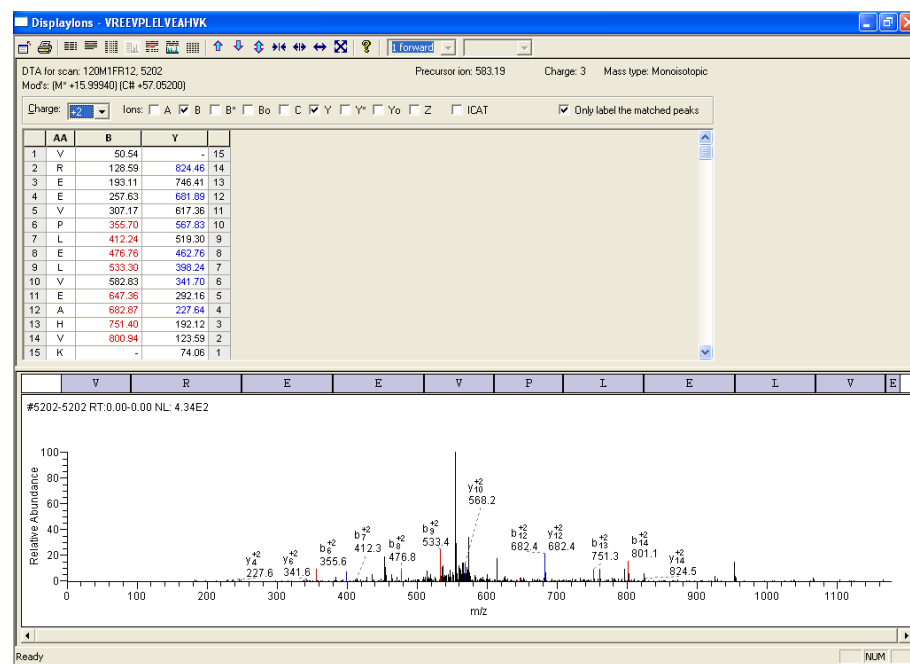

# RVREEVPLELVEAHVKK

IPI00125662.2, IPI00515361.1, IPI00752367.1

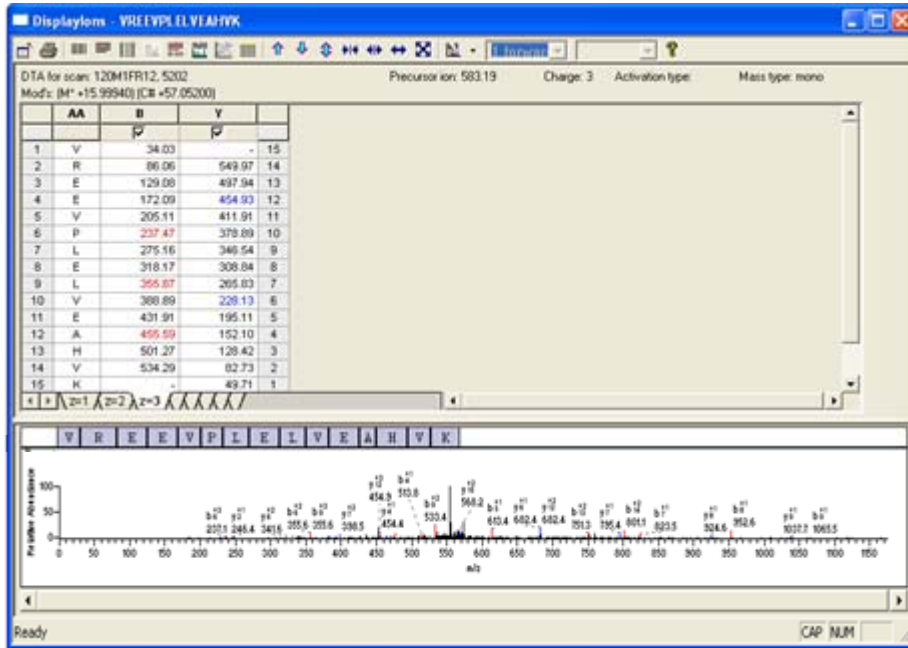

# RVSETVAFTDVNSILRY

## IPI00339916.7, IPI00750868.1

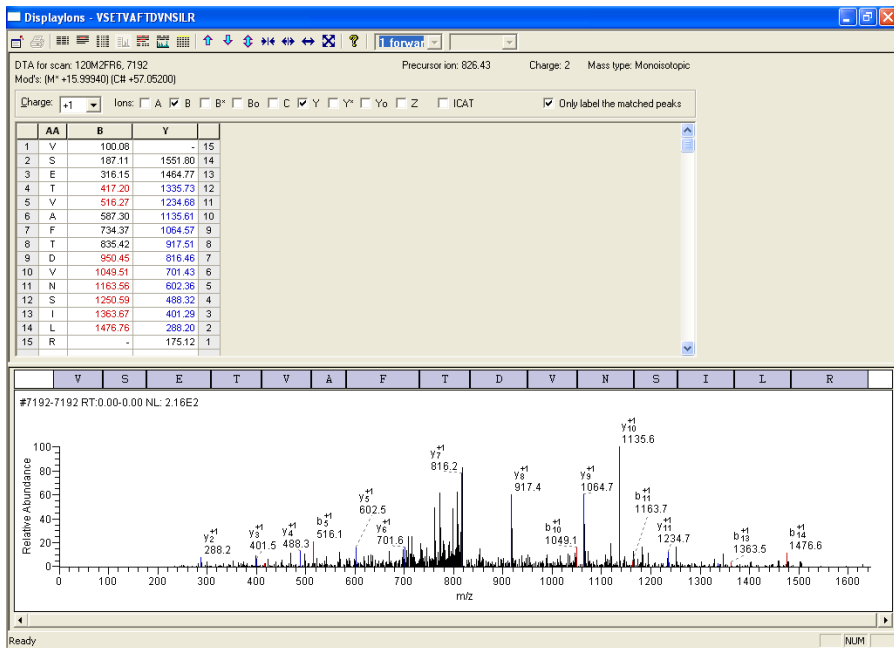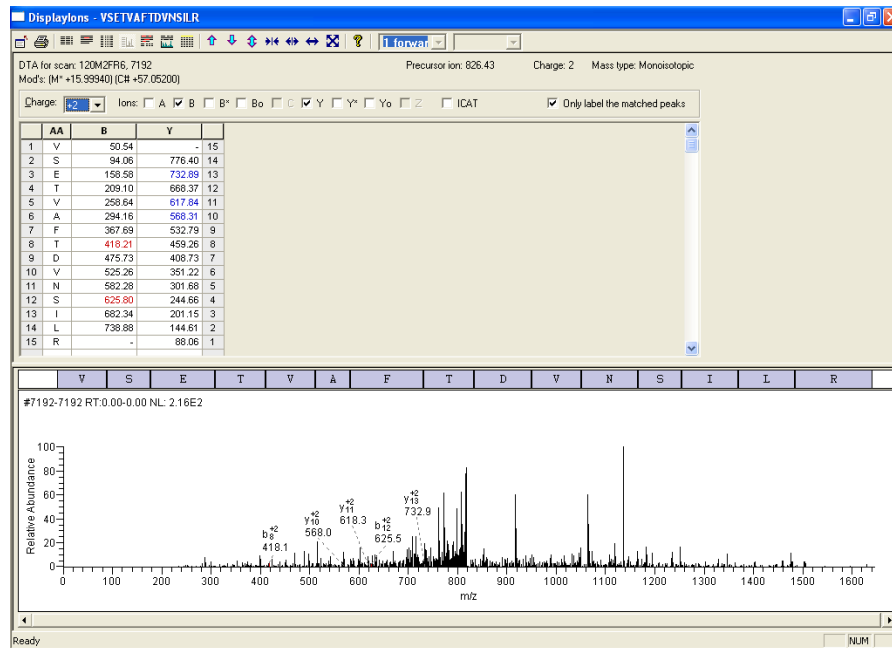

# RVYIASSSGSTAIAKK IPI00122265.1

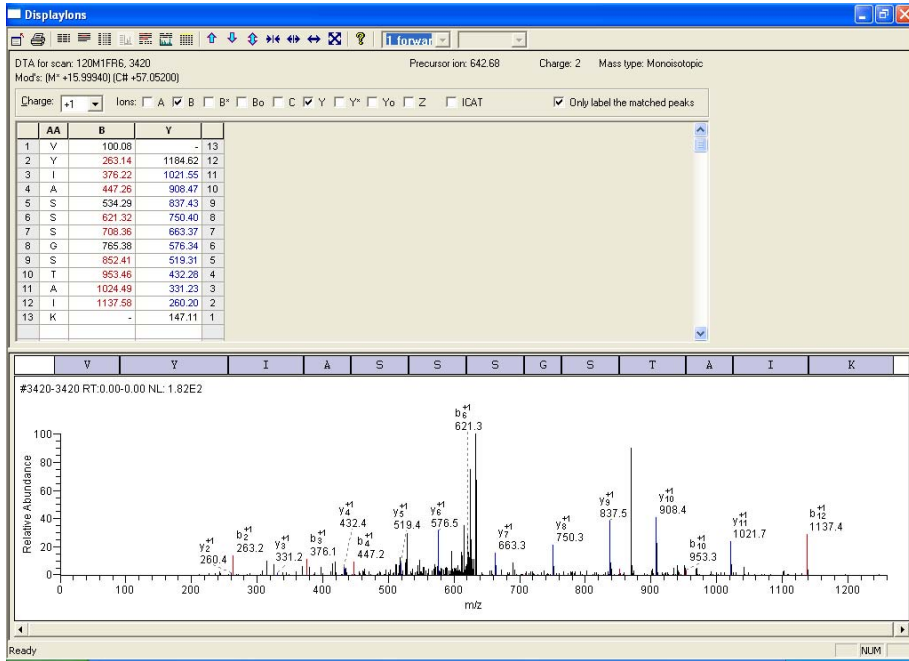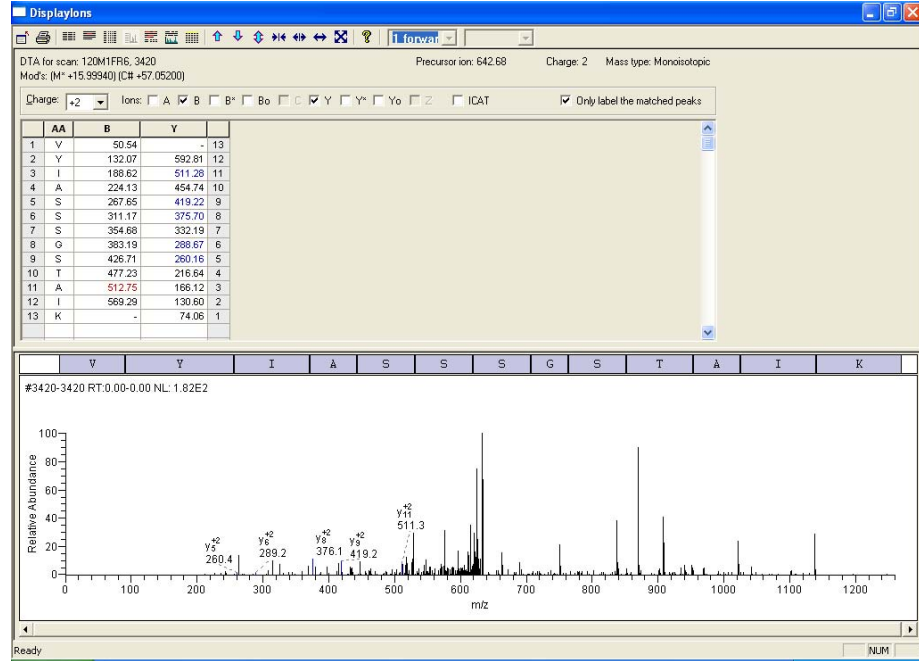

# RYALYDATYETKE IPI00266188.6

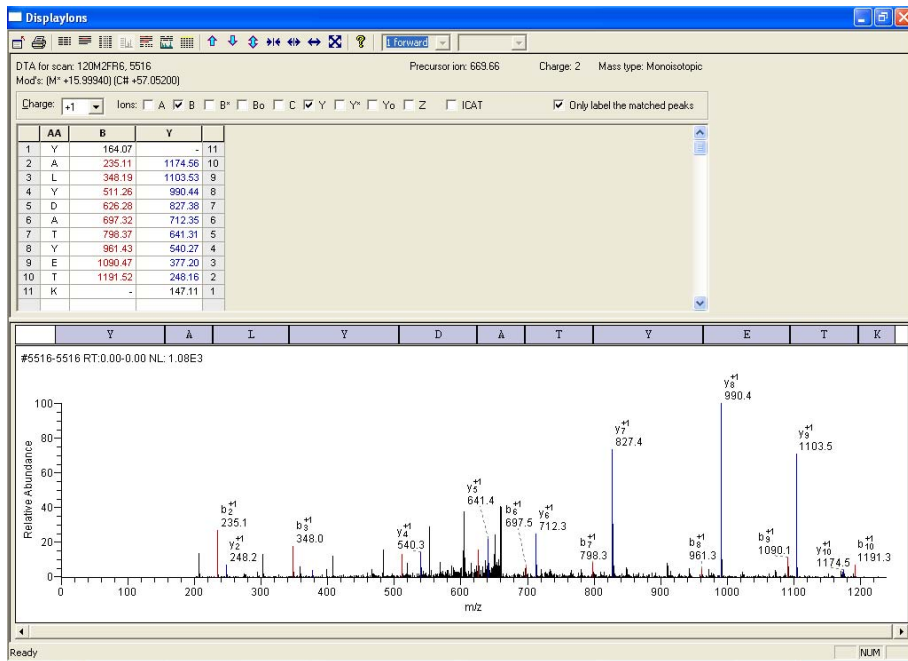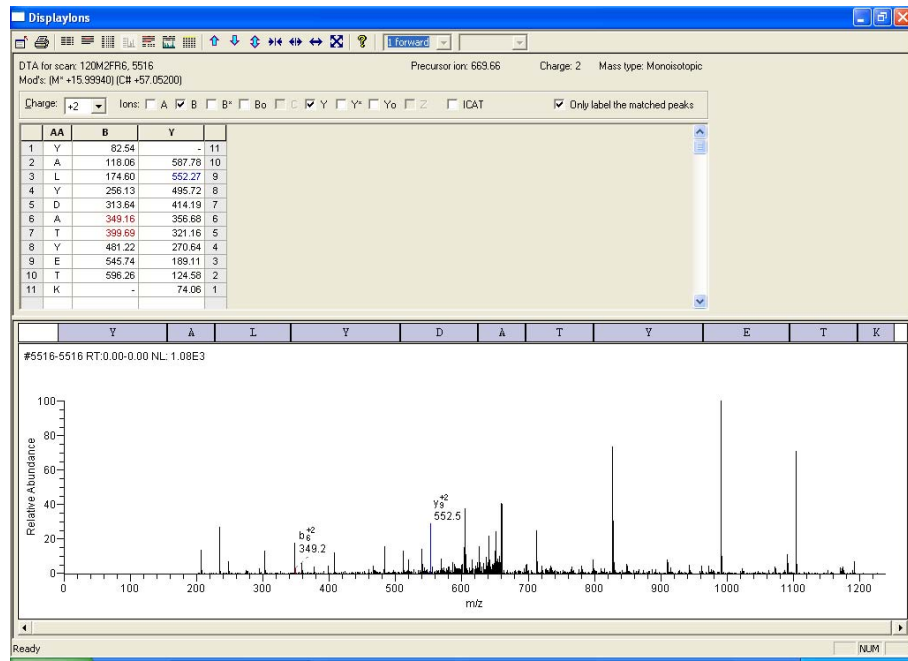

# RYFPTQALNFQAFKD

IPI00115564.4, IPI00127841.2, IPI00265371.2, IPI00462250.2, IPI00658303.1,  
IPI00676622.1, IPI00751119.1

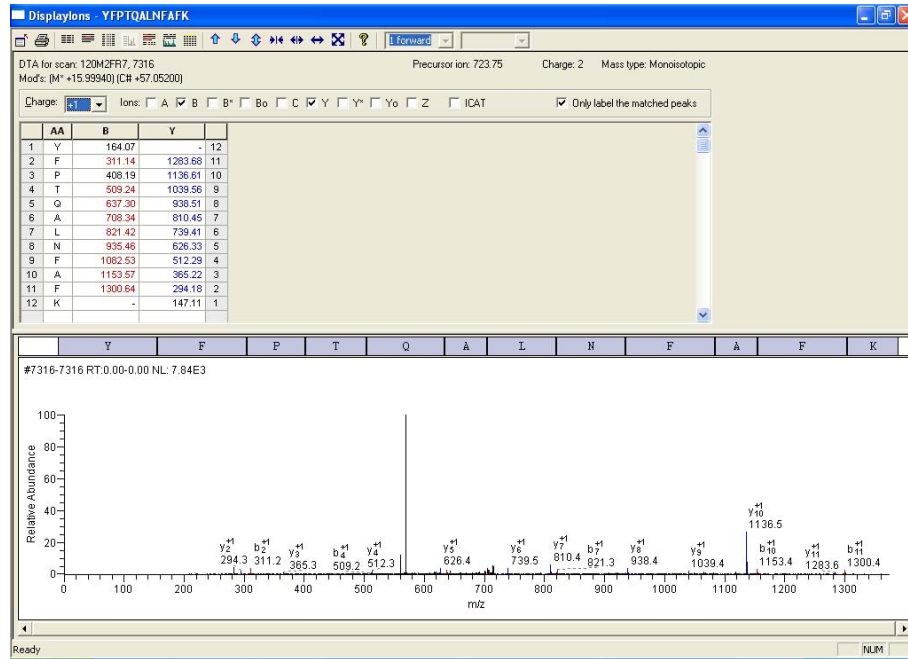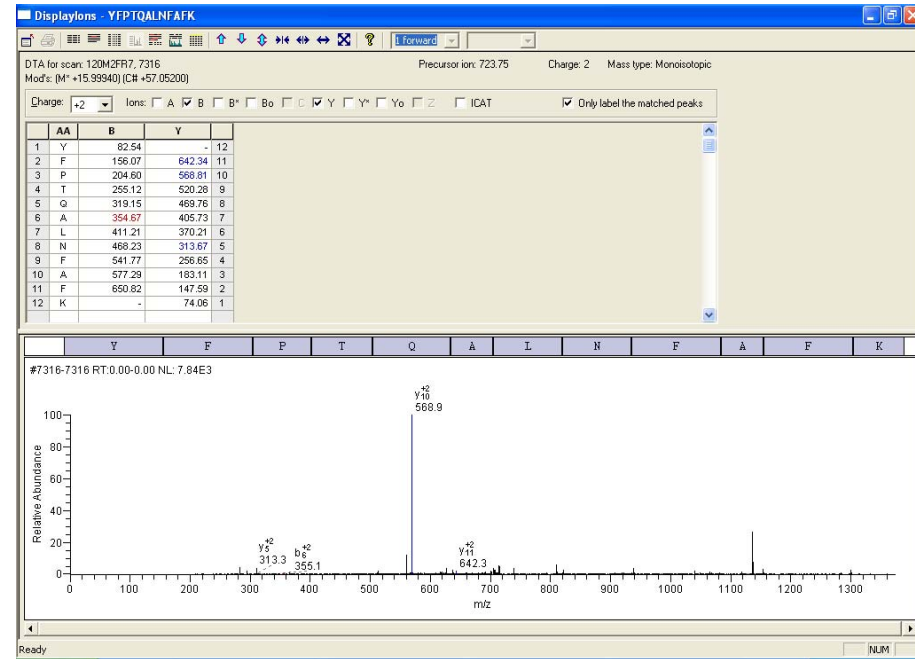

# RYLAEVAAGDDKKG

IPI00116498.1, IPI00761361.1

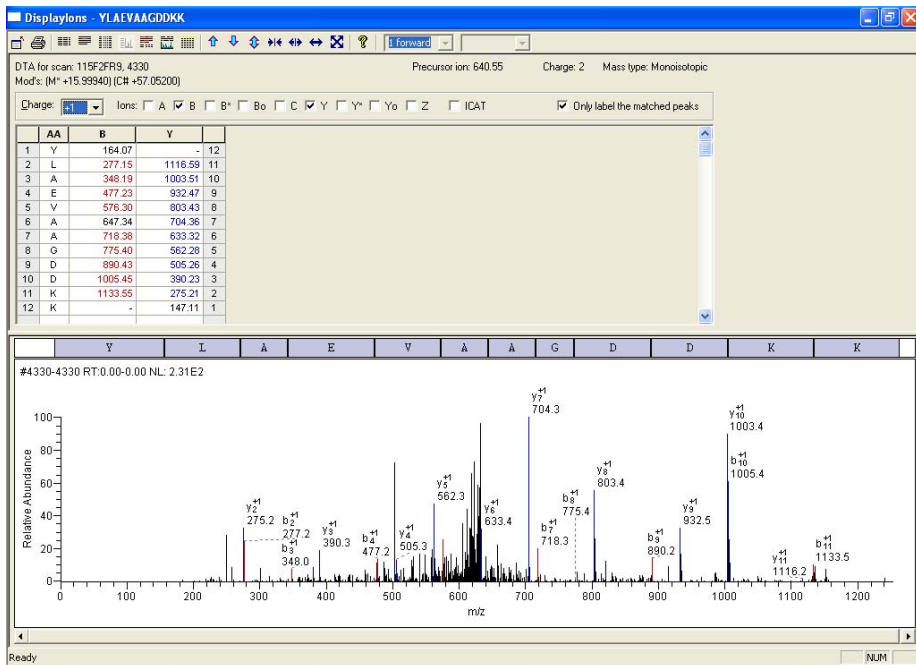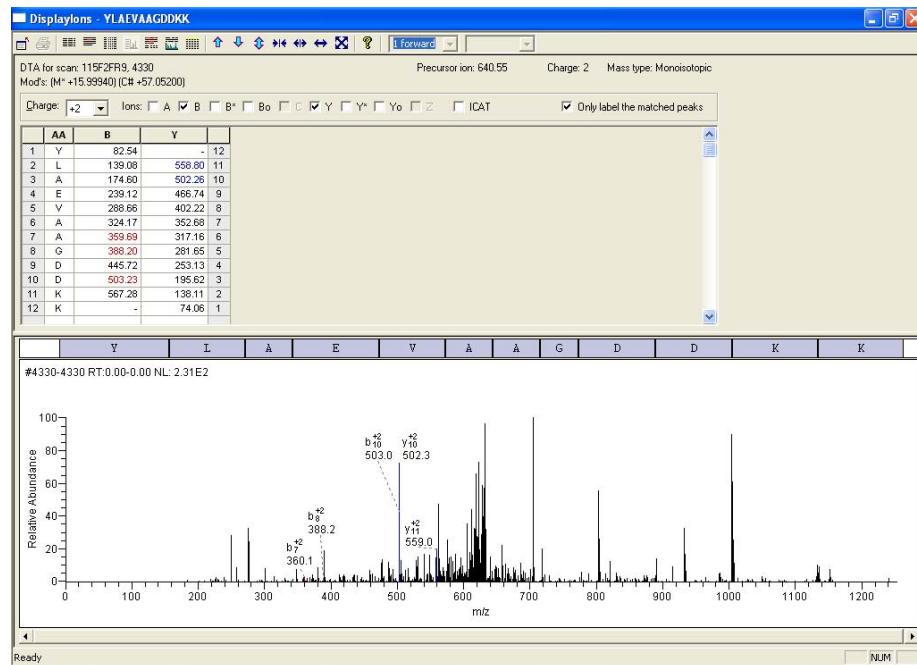

# RYQQAGLPLIVLAGKE IPI00622780.1

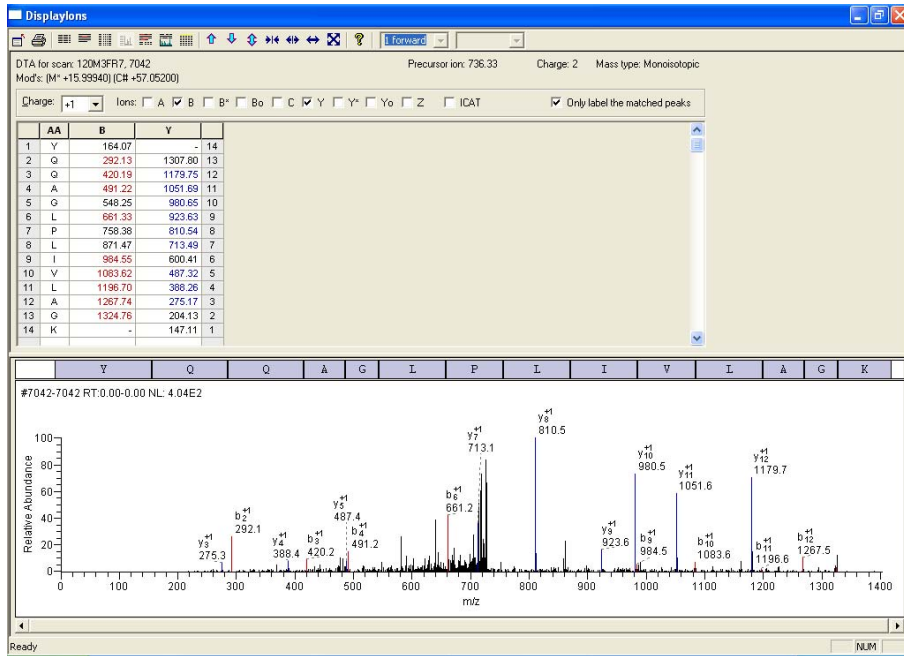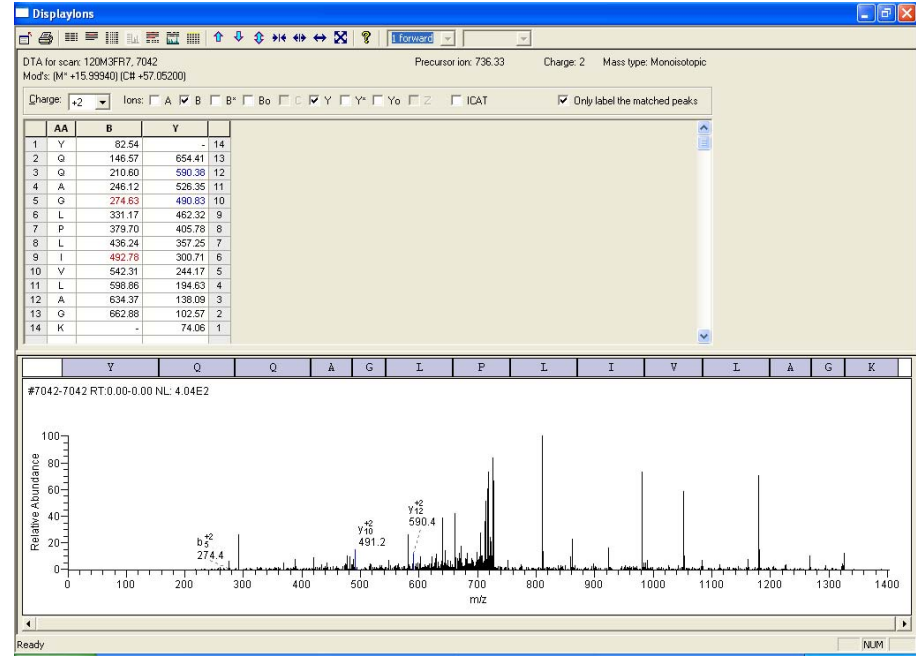

Supplement: M900108-MCP200_2.pdf [file M900108-MCP200_2.pdf]
