# Supplementary material
Source: PubMed Central journal article supplement (PMC2816018)
Supplement: M900108-MCP200_1.pdf [file M900108-MCP200_1.pdf]

Supplementary Data S1: IDs and stats for all 4494 peptide hits detected in screen

| Peptide Sequence*     | Actual Mass (Da) | Precursor Mass (Da) | z | m/z | Xcorr | $\Delta$ | CN |
|-----------------------|------------------|---------------------|---|-----|-------|----------|----|
| APNVLASEPEIPKG        | 1364.7421        | 682.24              | 2 | ### | 3.07  | 0.27     |    |
| APNVLASEPEIPKG        | 1364.7421        | 682.12              | 2 | ### | 3.19  | 0.51     |    |
| APNVLASEPEIPKG        | 1364.7421        | 682.08              | 2 | ### | 3.38  | 0.59     |    |
| APNVLASEPEIPKG        | 1364.7421        | 682.10              | 2 | ### | 3.39  | 0.55     |    |
| KAAATPESQEPQAKG       | 1327.6488        | 663.61              | 2 | ### | 2.81  | 0.43     |    |
| KAAATPESQEPQAKG       | 1327.6488        | 663.62              | 2 | ### | 3.42  | 0.41     |    |
| KAAFDDAIAELDTLSEESYKD | 2087.9656        | 1043.61             | 2 | ### | 4.93  | 0.74     |    |
| KAAFDDAIAELDTLSEESYKD | 2087.9656        | 1043.65             | 2 | ### | 5.38  | 0.66     |    |
| KAAFDDAIAELDTLSEESYKD | 2087.9656        | 1043.67             | 2 | ### | 5.55  | 0.63     |    |
| KAAFDDAIAELDTLSEESYKD | 2087.9656        | 1043.65             | 2 | ### | 5.77  | 0.66     |    |
| KAAGAAAIITEPEHTKE     | 1479.7802        | 739.65              | 2 | ### | 3.65  | 0.47     |    |
| KAAGAAAIITEPEHTKE     | 1479.7802        | 739.61              | 2 | ### | 3.90  | 0.55     |    |
| KADLNNLGTIAKS         | 1242.7052        | 621.19              | 2 | ### | 2.50  | 0.32     |    |
| KADLNNLGTIAKS         | 1242.7052        | 621.17              | 2 | ### | 2.51  | 0.36     |    |
| KADLNNLGTIAKS         | 1242.7052        | 621.22              | 2 | ### | 2.52  | 0.27     |    |
| KADLNNLGTIAKS         | 1242.7052        | 621.17              | 2 | ### | 2.55  | 0.36     |    |
| KADLNNLGTIAKS         | 1242.7052        | 621.20              | 2 | ### | 2.58  | 0.30     |    |
| KADLNNLGTIAKS         | 1242.7052        | 621.16              | 2 | ### | 2.62  | 0.39     |    |
| KADLNNLGTIAKS         | 1242.7052        | 621.23              | 2 | ### | 2.66  | 0.25     |    |
| KADLNNLGTIAKS         | 1242.7052        | 621.23              | 2 | ### | 2.71  | 0.24     |    |
| KADLNNLGTIAKS         | 1242.7052        | 621.19              | 2 | ### | 2.76  | 0.33     |    |
| KADLNNLGTIAKS         | 1242.7052        | 621.21              | 2 | ### | 2.76  | 0.28     |    |
| KADLNNLGTIAKS         | 1242.7052        | 621.17              | 2 | ### | 2.77  | 0.36     |    |
| KADLNNLGTIAKS         | 1242.7052        | 621.20              | 2 | ### | 2.77  | 0.30     |    |
| KADLNNLGTIAKS         | 1242.7052        | 621.17              | 2 | ### | 2.81  | 0.37     |    |
| KADLNNLGTIAKS         | 1242.7052        | 621.11              | 2 | ### | 2.82  | 0.49     |    |
| KADLNNLGTIAKS         | 1242.7052        | 621.17              | 2 | ### | 2.82  | 0.36     |    |
| KADLNNLGTIAKS         | 1242.7052        | 621.14              | 2 | ### | 2.84  | 0.43     |    |
| KADLNNLGTIAKS         | 1242.7052        | 621.18              | 2 | ### | 2.84  | 0.34     |    |
| KADLNNLGTIAKS         | 1242.7052        | 621.17              | 2 | ### | 2.86  | 0.37     |    |
| KADLNNLGTIAKS         | 1242.7052        | 621.14              | 2 | ### | 2.87  | 0.42     |    |
| KADLNNLGTIAKS         | 1242.7052        | 621.18              | 2 | ### | 2.87  | 0.36     |    |
| KADLNNLGTIAKS         | 1242.7052        | 621.22              | 2 | ### | 2.88  | 0.27     |    |
| KADLNNLGTIAKS         | 1242.7052        | 621.26              | 2 | ### | 2.90  | 0.18     |    |
| KADLNNLGTIAKS         | 1242.7052        | 621.21              | 2 | ### | 2.92  | 0.29     |    |
| KADLNNLGTIAKS         | 1242.7052        | 621.18              | 2 | ### | 2.92  | 0.34     |    |
| KADLNNLGTIAKS         | 1242.7052        | 621.13              | 2 | ### | 2.92  | 0.44     |    |
| KADLNNLGTIAKS         | 1242.7052        | 621.13              | 2 | ### | 2.94  | 0.44     |    |
| KADLNNLGTIAKS         | 1242.7052        | 621.20              | 2 | ### | 2.94  | 0.30     |    |
| KADLNNLGTIAKS         | 1242.7052        | 621.14              | 2 | ### | 2.94  | 0.42     |    |
| KADLNNLGTIAKS         | 1242.7052        | 621.16              | 2 | ### | 2.96  | 0.39     |    |
| KADLNNLGTIAKS         | 1242.7052        | 621.24              | 2 | ### | 2.98  | 0.22     |    |
| KADLNNLGTIAKS         | 1242.7052        | 621.25              | 2 | ### | 3.00  | 0.21     |    |
| KADLNNLGTIAKS         | 1242.7052        | 621.19              | 2 | ### | 3.00  | 0.33     |    |
| KADLNNLGTIAKS         | 1242.7052        | 621.14              | 2 | ### | 3.01  | 0.42     |    |
| KADLNNLGTIAKS         | 1242.7052        | 621.15              | 2 | ### | 3.01  | 0.40     |    |
| KADLNNLGTIAKS         | 1242.7052        | 621.23              | 2 | ### | 3.03  | 0.25     |    |
| KADLNNLGTIAKS         | 1242.7052        | 621.23              | 2 | ### | 3.06  | 0.24     |    |
| KADLNNLGTIAKS         | 1242.7052        | 621.17              | 2 | ### | 3.06  | 0.37     |    |
| KADLNNLGTIAKS         | 1242.7052        | 621.15              | 2 | ### | 3.07  | 0.41     |    |
| KADLNNLGTIAKS         | 1242.7052        | 621.17              | 2 | ### | 3.07  | 0.36     |    |
| KADLNNLGTIAKS         | 1242.7052        | 621.14              | 2 | ### | 3.07  | 0.43     |    |
| KADLNNLGTIAKS         | 1242.7052        | 621.16              | 2 | ### | 3.09  | 0.39     |    |

|                         |           |         |         |      |      |
|-------------------------|-----------|---------|---------|------|------|
| KADLINNLGTIAKS          | 1242.7052 | 621.20  | 2 ##### | 3.11 | 0.30 |
| KADLINNLGTIAKS          | 1242.7052 | 621.21  | 2 ##### | 3.11 | 0.28 |
| KADLINNLGTIAKS          | 1242.7052 | 621.25  | 2 ##### | 3.12 | 0.21 |
| KADLINNLGTIAKS          | 1242.7052 | 621.17  | 2 ##### | 3.13 | 0.37 |
| KADLINNLGTIAKS          | 1242.7052 | 621.18  | 2 ##### | 3.14 | 0.35 |
| KADLINNLGTIAKS          | 1242.7052 | 621.23  | 2 ##### | 3.16 | 0.24 |
| KADLINNLGTIAKS          | 1242.7052 | 621.16  | 2 ##### | 3.17 | 0.39 |
| KADLINNLGTIAKS          | 1242.7052 | 621.18  | 2 ##### | 3.18 | 0.35 |
| KADLINNLGTIAKS          | 1242.7052 | 621.20  | 2 ##### | 3.20 | 0.31 |
| KADLINNLGTIAKS          | 1242.7052 | 621.19  | 2 ##### | 3.22 | 0.32 |
| KADLINNLGTIAKS          | 1242.7052 | 621.11  | 2 ##### | 3.22 | 0.49 |
| KADLINNLGTIAKS          | 1242.7052 | 621.18  | 2 ##### | 3.23 | 0.35 |
| KADLINNLGTIAKS          | 1242.7052 | 621.19  | 2 ##### | 3.23 | 0.32 |
| KADLINNLGTIAKS          | 1242.7052 | 621.22  | 2 ##### | 3.25 | 0.27 |
| KADLINNLGTIAKS          | 1242.7052 | 621.18  | 2 ##### | 3.27 | 0.34 |
| KADLINNLGTIAKS          | 1242.7052 | 621.15  | 2 ##### | 3.28 | 0.40 |
| KADLINNLGTIAKS          | 1242.7052 | 621.16  | 2 ##### | 3.29 | 0.38 |
| KADLINNLGTIAKS          | 1242.7052 | 621.16  | 2 ##### | 3.30 | 0.39 |
| KADLINNLGTIAKS          | 1242.7052 | 621.15  | 2 ##### | 3.30 | 0.40 |
| KADLINNLGTIAKS          | 1242.7052 | 621.29  | 2 ##### | 3.34 | 0.12 |
| KADLINNLGTIAKS          | 1242.7052 | 621.15  | 2 ##### | 3.36 | 0.41 |
| KADLINNLGTIAKS          | 1242.7052 | 621.17  | 2 ##### | 3.40 | 0.37 |
| KADLINNLGTIAKS          | 1242.7052 | 621.19  | 2 ##### | 3.41 | 0.33 |
| KADLINNLGTIAKS          | 1242.7052 | 621.13  | 2 ##### | 3.43 | 0.45 |
| KADLINNLGTIAKS          | 1242.7052 | 621.17  | 2 ##### | 3.46 | 0.36 |
| KADLINNLGTIAKS          | 1242.7052 | 621.17  | 2 ##### | 3.51 | 0.36 |
| KADLINNLGTIAKS          | 1242.7052 | 621.11  | 2 ##### | 3.63 | 0.48 |
| KADLINNLGTIAKS          | 1242.7052 | 621.09  | 2 ##### | 3.80 | 0.52 |
| KADLINNLGTIAKS          | 1242.7052 | 621.12  | 2 ##### | 3.85 | 0.47 |
| KAEVLSEEPILKW           | 1227.6831 | 613.66  | 2 ##### | 2.86 | 0.37 |
| KAEVLSEEPILKW           | 1227.6831 | 613.68  | 2 ##### | 2.98 | 0.31 |
| KAIAGTGANVIVTGGKV       | 1328.7533 | 664.22  | 2 ##### | 3.72 | 0.31 |
| KAIAGTGANVIVTGGKV       | 1328.7533 | 664.07  | 2 ##### | 4.01 | 0.61 |
| KALGGASGGYTTGPEPLVSLLRQ | 2016.0760 | 1007.81 | 2 ##### | 3.51 | 0.46 |
| KALIAAQYSGAQVRV         | 1347.7379 | 673.67  | 2 ##### | 2.99 | 0.40 |
| KALIAAQYSGAQVRV         | 1347.7379 | 673.65  | 2 ##### | 3.56 | 0.44 |
| KALIAAQYSGAQVRV         | 1347.7379 | 673.58  | 2 ##### | 3.72 | 0.57 |
| KALIAAQYSGAQVRV         | 1347.7379 | 673.59  | 2 ##### | 3.80 | 0.55 |
| KALIAAQYSGAQVRV         | 1347.7379 | 673.59  | 2 ##### | 3.98 | 0.56 |
| KALIAAQYSGAQVRV         | 1347.7379 | 673.59  | 2 ##### | 4.04 | 0.55 |
| KALIAAQYSGAQVRV         | 1347.7379 | 673.58  | 2 ##### | 4.06 | 0.57 |
| KALIAAQYSGAQVRV         | 1347.7379 | 673.57  | 2 ##### | 4.39 | 0.59 |
| KALQDLENAASGDATVRQ      | 1630.8031 | 815.28  | 2 ##### | 2.54 | 0.24 |
| KALQDLENAASGDATVRQ      | 1630.8031 | 815.25  | 2 ##### | 3.15 | 0.30 |
| KALQSVGQIVGEVLKQ        | 1440.8420 | 720.26  | 2 ##### | 2.76 | 0.33 |
| KALQSVGQIVGEVLKQ        | 1440.8420 | 720.16  | 2 ##### | 3.43 | 0.52 |
| KALQSVGQIVGEVLKQ        | 1440.8420 | 720.15  | 2 ##### | 3.46 | 0.53 |
| KANKLDHVVTIIG           | 1350.8103 | 675.27  | 2 ##### | 2.71 | 0.26 |
| KANKLDHVVTIIG           | 1350.8103 | 675.22  | 2 ##### | 3.11 | 0.36 |
| KANKLDHVVTIIG           | 1350.8103 | 675.22  | 2 ##### | 3.22 | 0.36 |
| KANKLDHVVTIIG           | 1350.8103 | 675.19  | 2 ##### | 3.31 | 0.42 |
| KAPILIATDVASRG          | 1226.7103 | 613.15  | 2 ##### | 2.63 | 0.41 |
| KAPILIATDVASRG          | 1226.7103 | 613.11  | 2 ##### | 2.79 | 0.50 |
| KAPILIATDVASRG          | 1226.7103 | 613.12  | 2 ##### | 3.16 | 0.47 |
| KAPILIATDVASRG          | 1226.7103 | 613.12  | 2 ##### | 3.34 | 0.48 |
| KAPILIATDVASRG          | 1226.7103 | 613.09  | 2 ##### | 3.67 | 0.53 |

|                     |           |        |         |      |      |
|---------------------|-----------|--------|---------|------|------|
| KAPILIATDVASRG      | 1226.7103 | 613.11 | 2 ##### | 3.69 | 0.49 |
| KAPVPTGEVYFADSFDRG  | 1770.8334 | 885.16 | 2 ##### | 4.16 | 0.50 |
| KAQQVVSQGLDVLTAKV   | 1457.7958 | 728.72 | 2 ##### | 2.58 | 0.35 |
| KAQQVVSQGLDVLTAKV   | 1457.7958 | 728.75 | 2 ##### | 3.12 | 0.29 |
| KAQSELSGAADEAARA    | 1375.6448 | 687.59 | 2 ##### | 3.51 | 0.46 |
| KAQSELSGAADEAARA    | 1375.6448 | 687.59 | 2 ##### | 3.70 | 0.47 |
| KAQSELSGAADEAARA    | 1375.6448 | 687.58 | 2 ##### | 4.18 | 0.49 |
| KAQSELSGAADEAARA    | 1375.6448 | 687.58 | 2 ##### | 4.19 | 0.48 |
| KAQSELSGAADEAARA    | 1375.6448 | 687.56 | 2 ##### | 4.35 | 0.53 |
| KAQSELSGAADEAARA    | 1375.6448 | 687.59 | 2 ##### | 4.73 | 0.47 |
| KAQVAQPGGDTIFGKI    | 1388.7168 | 694.16 | 2 ##### | 3.49 | 0.40 |
| KAQVAQPGGDTIFGKI    | 1388.7168 | 694.14 | 2 ##### | 3.54 | 0.45 |
| KASAEQIEEEVTKL      | 1333.6482 | 666.74 | 2 ##### | 2.59 | 0.16 |
| KASAEQIEEEVTKL      | 1333.6482 | 666.70 | 2 ##### | 2.70 | 0.25 |
| KASIPFSVVGSNQLIEAKG | 1759.9589 | 879.79 | 2 ##### | 2.71 | 0.39 |
| KASIPFSVVGSNQLIEAKG | 1759.9589 | 879.71 | 2 ##### | 3.54 | 0.54 |
| KASIPFSVVGSNQLIEAKG | 1759.9589 | 879.76 | 2 ##### | 3.59 | 0.43 |
| KASIPFSVVGSNQLIEAKG | 1759.9589 | 879.74 | 2 ##### | 4.40 | 0.47 |
| KATDAEADVASLNRR     | 1332.6390 | 666.08 | 2 ##### | 3.70 | 0.48 |
| KATDAEADVASLNRR     | 1332.6390 | 666.10 | 2 ##### | 3.94 | 0.43 |
| KATDAEADVASLNRR     | 1332.6390 | 666.12 | 2 ##### | 4.13 | 0.40 |
| KATDAEADVASLNRR     | 1332.6390 | 666.07 | 2 ##### | 4.36 | 0.50 |
| KATQTLQTLGEAQSKG    | 1475.7700 | 737.63 | 2 ##### | 3.34 | 0.51 |
| KAVAQGNLSSADVQAAKN  | 1529.7919 | 764.65 | 2 ##### | 4.21 | 0.48 |
| KAVAQGNLSSADVQAAKN  | 1529.7919 | 764.66 | 2 ##### | 4.32 | 0.48 |
| KAVAQGNLSSADVQAAKN  | 1529.7919 | 764.64 | 2 ##### | 4.35 | 0.50 |
| KAVAQGNLSSADVQAAKN  | 1529.7919 | 764.64 | 2 ##### | 4.50 | 0.52 |
| KAVAQGNLSSADVQAAKN  | 1529.7919 | 764.64 | 2 ##### | 4.69 | 0.51 |
| KAVAQGNLSSADVQAAKN  | 1529.7919 | 764.63 | 2 ##### | 4.74 | 0.53 |
| KAVAQGNLSSADVQAAKN  | 1529.7919 | 764.65 | 2 ##### | 4.85 | 0.49 |
| KAVAQGNLSSADVQAAKN  | 1529.7919 | 764.64 | 2 ##### | 5.08 | 0.51 |
| KAVAQGNLSSADVQAAKN  | 1529.7919 | 764.64 | 2 ##### | 5.26 | 0.52 |
| KAVAQGNLSSADVQAAKN  | 1529.7919 | 764.62 | 2 ##### | 5.33 | 0.55 |
| KAVTEQGAELSNEERN    | 1532.7188 | 766.13 | 2 ##### | 3.72 | 0.46 |
| KAVTEQGAELSNEERN    | 1532.7188 | 766.12 | 2 ##### | 3.86 | 0.48 |
| KAVTEQGAELSNEERN    | 1532.7188 | 766.08 | 2 ##### | 4.02 | 0.56 |
| KAVTEQGAELSNEERN    | 1532.7188 | 766.14 | 2 ##### | 4.06 | 0.43 |
| KAVTEQGAELSNEERN    | 1532.7188 | 766.16 | 2 ##### | 4.11 | 0.40 |
| KAVTEQGAELSNEERN    | 1532.7188 | 766.16 | 2 ##### | 4.16 | 0.40 |
| KAVTEQGAELSNEERN    | 1532.7188 | 766.11 | 2 ##### | 4.18 | 0.50 |
| KAVTEQGAELSNEERN    | 1532.7188 | 766.09 | 2 ##### | 4.24 | 0.54 |
| KAVTEQGAELSNEERN    | 1532.7188 | 766.13 | 2 ##### | 4.25 | 0.45 |
| KAVTEQGAELSNEERN    | 1532.7188 | 766.07 | 2 ##### | 4.33 | 0.57 |
| KAVTEQGAELSNEERN    | 1532.7188 | 766.09 | 2 ##### | 4.39 | 0.54 |
| KAVTEQGAELSNEERN    | 1532.7188 | 766.16 | 2 ##### | 4.43 | 0.39 |
| KAVTEQGAELSNEERN    | 1532.7188 | 766.09 | 2 ##### | 4.65 | 0.54 |
| KAVTEQGAELSNEERN    | 1532.7188 | 766.08 | 2 ##### | 4.68 | 0.56 |
| KAVTEQGHELSNEERN    | 1598.7405 | 799.14 | 2 ##### | 3.40 | 0.46 |
| KAVTEQGHELSNEERN    | 1598.7405 | 799.13 | 2 ##### | 3.70 | 0.49 |
| KAVTEQGHELSNEERN    | 1598.7405 | 799.10 | 2 ##### | 3.94 | 0.55 |
| KAVTEQGHELSNEERN    | 1598.7405 | 799.09 | 2 ##### | 4.35 | 0.56 |
| KAVTEQGHELSNEERN    | 1598.7405 | 799.09 | 2 ##### | 4.39 | 0.57 |
| KAVTEQGHELSNEERN    | 1598.7405 | 799.08 | 2 ##### | 4.60 | 0.58 |
| KAVTEQGHELSNEERN    | 1598.7405 | 799.08 | 2 ##### | 4.69 | 0.58 |
| KDAALATALGDKKS      | 1173.6473 | 586.68 | 2 ##### | 2.77 | 0.30 |
| KDAALATALGDKKS      | 1173.6473 | 586.66 | 2 ##### | 2.80 | 0.33 |

|                       |           |        |         |      |      |
|-----------------------|-----------|--------|---------|------|------|
| KDAALATALGDKKS        | 1173.6473 | 586.69 | 2 ##### | 3.08 | 0.28 |
| KDAALATALGDKKS        | 1173.6473 | 586.66 | 2 ##### | 3.13 | 0.33 |
| KDAALATALGDKKS        | 1173.6473 | 586.64 | 2 ##### | 3.54 | 0.37 |
| KDAALATALGDKKS        | 1173.6473 | 586.65 | 2 ##### | 3.73 | 0.35 |
| KDAALATALGDKKS        | 1173.6473 | 586.65 | 2 ##### | 3.78 | 0.35 |
| KDAEDQEAQLKN          | 1146.5273 | 573.14 | 2 ##### | 2.98 | 0.25 |
| KDAEDQEAQLKN          | 1146.5273 | 573.13 | 2 ##### | 3.12 | 0.28 |
| KDAGEGGLSLAIEGPSKA    | 1500.7540 | 750.15 | 2 ##### | 3.40 | 0.46 |
| KDAGTIAGLNVLRI        | 1199.6743 | 599.66 | 2 ##### | 2.53 | 0.35 |
| KDAGTIAGLNVLRI        | 1199.6743 | 599.71 | 2 ##### | 2.61 | 0.26 |
| KDAGTIAGLNVLRI        | 1199.6743 | 599.75 | 2 ##### | 2.61 | 0.17 |
| KDAGTIAGLNVLRI        | 1199.6743 | 599.74 | 2 ##### | 2.66 | 0.20 |
| KDAGTIAGLNVLRI        | 1199.6743 | 599.74 | 2 ##### | 2.70 | 0.19 |
| KDAGTIAGLNVLRI        | 1199.6743 | 599.73 | 2 ##### | 2.70 | 0.22 |
| KDAGTIAGLNVLRI        | 1199.6743 | 599.73 | 2 ##### | 2.72 | 0.22 |
| KDAGTIAGLNVLRI        | 1199.6743 | 599.77 | 2 ##### | 2.73 | 0.13 |
| KDAGTIAGLNVLRI        | 1199.6743 | 599.75 | 2 ##### | 2.73 | 0.18 |
| KDAGTIAGLNVLRI        | 1199.6743 | 599.77 | 2 ##### | 2.75 | 0.13 |
| KDAGTIAGLNVLRI        | 1199.6743 | 599.72 | 2 ##### | 2.78 | 0.23 |
| KDAGTIAGLNVLRI        | 1199.6743 | 599.70 | 2 ##### | 2.78 | 0.28 |
| KDAGTIAGLNVLRI        | 1199.6743 | 599.74 | 2 ##### | 2.83 | 0.19 |
| KDAGTIAGLNVLRI        | 1199.6743 | 599.69 | 2 ##### | 2.83 | 0.29 |
| KDAGTIAGLNVLRI        | 1199.6743 | 599.66 | 2 ##### | 2.85 | 0.35 |
| KDAGTIAGLNVLRI        | 1199.6743 | 599.74 | 2 ##### | 2.88 | 0.19 |
| KDAGTIAGLNVLRI        | 1199.6743 | 599.71 | 2 ##### | 2.90 | 0.26 |
| KDAGTIAGLNVLRI        | 1199.6743 | 599.72 | 2 ##### | 2.93 | 0.23 |
| KDAGTIAGLNVLRI        | 1199.6743 | 599.70 | 2 ##### | 2.93 | 0.27 |
| KDAGTIAGLNVLRI        | 1199.6743 | 599.72 | 2 ##### | 2.97 | 0.23 |
| KDAGTIAGLNVLRI        | 1199.6743 | 599.74 | 2 ##### | 3.02 | 0.20 |
| KDAGTIAGLNVLRI        | 1199.6743 | 599.76 | 2 ##### | 3.03 | 0.15 |
| KDAGTIAGLNVLRI        | 1199.6743 | 599.66 | 2 ##### | 3.04 | 0.35 |
| KDAGTIAGLNVLRI        | 1199.6743 | 599.71 | 2 ##### | 3.10 | 0.26 |
| KDAGTIAGLNVLRI        | 1199.6743 | 599.70 | 2 ##### | 3.25 | 0.27 |
| KDAGTIAGLNVLRI        | 1199.6743 | 599.67 | 2 ##### | 3.29 | 0.33 |
| KDAGTIAGLNVLRI        | 1199.6743 | 599.71 | 2 ##### | 3.34 | 0.26 |
| KDAGTIAGLNVLRI        | 1199.6743 | 599.66 | 2 ##### | 3.37 | 0.36 |
| KDATNVGDEGGFAPNILENKE | 1960.9247 | 980.26 | 2 ##### | 2.91 | 0.40 |
| KDATNVGDEGGFAPNILENKE | 1960.9247 | 980.19 | 2 ##### | 3.14 | 0.54 |
| KDATNVGDEGGFAPNILENKE | 1960.9247 | 980.26 | 2 ##### | 3.76 | 0.41 |
| KDATNVGDEGGFAPNILENKE | 1960.9247 | 980.22 | 2 ##### | 3.93 | 0.47 |
| KDATNVGDEGGFAPNILENKE | 1960.9247 | 980.22 | 2 ##### | 3.99 | 0.49 |
| KDATNVGDEGGFAPNILENKE | 1960.9247 | 980.19 | 2 ##### | 4.01 | 0.54 |
| KDATNVGDEGGFAPNILENKE | 1960.9247 | 980.20 | 2 ##### | 4.11 | 0.52 |
| KDATNVGDEGGFAPNILENKE | 1960.9247 | 980.26 | 2 ##### | 4.40 | 0.41 |
| KDATNVGDEGGFAPNILENKE | 1960.9247 | 980.19 | 2 ##### | 4.67 | 0.55 |
| KDATNVGDEGGFAPNILENKE | 1960.9247 | 980.19 | 2 ##### | 4.76 | 0.55 |
| KDATNVGDEGGFAPNILENKE | 1960.9247 | 980.18 | 2 ##### | 4.98 | 0.56 |
| KDATNVGDEGGFAPNILENKE | 1960.9247 | 980.15 | 2 ##### | 5.17 | 0.62 |
| KDATNVGDEGGFAPNILENKE | 1960.9247 | 980.21 | 2 ##### | 5.23 | 0.50 |
| KDATNVGDEGGFAPNILENKE | 1960.9247 | 980.17 | 2 ##### | 5.33 | 0.58 |
| KDATNVGDEGGFAPNILENKE | 1960.9247 | 980.21 | 2 ##### | 5.41 | 0.50 |
| KDATNVGDEGGFAPNILENKE | 1960.9247 | 980.20 | 2 ##### | 5.41 | 0.52 |
| KDATNVGDEGGFAPNILENKE | 1960.9247 | 980.16 | 2 ##### | 5.43 | 0.60 |
| KDATNVGDEGGFAPNILENKE | 1960.9247 | 980.23 | 2 ##### | 5.53 | 0.46 |
| KDATNVGDEGGFAPNILENKE | 1960.9247 | 980.14 | 2 ##### | 5.68 | 0.65 |
| KDATNVGDEGGFAPNILENKE | 1960.9247 | 980.19 | 2 ##### | 5.77 | 0.53 |

|                       |           |        |         |      |      |
|-----------------------|-----------|--------|---------|------|------|
| KDATNVGDEGGFAPNILENKE | 1960.9247 | 980.19 | 2 ##### | 5.90 | 0.55 |
| KDATNVGDEGGFAPNILENKE | 1960.9247 | 980.18 | 2 ##### | 6.05 | 0.56 |
| KDEILPTTPISEQKG       | 1470.7687 | 735.18 | 2 ##### | 2.75 | 0.41 |
| KDEILPTTPISEQKG       | 1470.7687 | 735.20 | 2 ##### | 3.00 | 0.36 |
| KDEILPTTPISEQKG       | 1470.7687 | 735.18 | 2 ##### | 3.18 | 0.40 |
| KDEILPTTPISEQKG       | 1470.7687 | 735.20 | 2 ##### | 3.34 | 0.38 |
| KDEQGSAADESDSPTIEAVRL | 1976.8679 | 988.18 | 2 ##### | 3.85 | 0.51 |
| KDEQGSAADESDSPTIEAVRL | 1976.8679 | 988.26 | 2 ##### | 4.39 | 0.36 |
| KDEQGSAADESDSPTIEAVRL | 1976.8679 | 988.14 | 2 ##### | 4.46 | 0.59 |
| KDEQGSAADESDSPTIEAVRL | 1976.8679 | 988.31 | 2 ##### | 4.62 | 0.26 |
| KDFLAGGIAAAVSKT       | 1219.6681 | 609.78 | 2 ##### | 3.79 | 0.10 |
| KDFLAGGIAAAVSKT       | 1219.6681 | 609.76 | 2 ##### | 3.80 | 0.16 |
| KDFLAGGVAAAISKT       | 1219.6681 | 609.75 | 2 ##### | 3.60 | 0.16 |
| KDFLAGGVAAAISKT       | 1219.6681 | 609.69 | 2 ##### | 3.92 | 0.30 |
| KDFLAGGVAAAISKT       | 1219.6681 | 609.68 | 2 ##### | 4.02 | 0.30 |
| KDFLAGGVAAAISKT       | 1219.6681 | 609.69 | 2 ##### | 4.24 | 0.28 |
| KDFSATDLTEFAARA       | 1443.6750 | 721.67 | 2 ##### | 2.60 | 0.33 |
| KDFSATDLTEFAARA       | 1443.6750 | 721.58 | 2 ##### | 3.01 | 0.52 |
| KDFSATDLTEFAARA       | 1443.6750 | 721.65 | 2 ##### | 3.02 | 0.38 |
| KDFSATDLTEFAARA       | 1443.6750 | 721.55 | 2 ##### | 3.10 | 0.58 |
| KDFSATDLTEFAARA       | 1443.6750 | 721.53 | 2 ##### | 3.29 | 0.61 |
| KDFSATDLTEFAARA       | 1443.6750 | 721.59 | 2 ##### | 3.48 | 0.50 |
| KDFSATDLTEFAARA       | 1443.6750 | 721.57 | 2 ##### | 3.49 | 0.54 |
| KDFSATDLTEFAARA       | 1443.6750 | 721.58 | 2 ##### | 3.71 | 0.51 |
| KDFSATDLTEFAARA       | 1443.6750 | 721.58 | 2 ##### | 3.86 | 0.52 |
| KDFSATDLTEFAARA       | 1443.6750 | 721.56 | 2 ##### | 4.03 | 0.56 |
| KDFSATDLTEFAARA       | 1443.6750 | 721.55 | 2 ##### | 4.32 | 0.58 |
| KDFSATDLTEFAARA       | 1443.6750 | 721.54 | 2 ##### | 4.38 | 0.60 |
| KDFTPAAQAAAFQKV       | 1294.6426 | 647.06 | 2 ##### | 3.13 | 0.51 |
| KDFTPAAQAAAFQKV       | 1294.6426 | 647.05 | 2 ##### | 3.14 | 0.55 |
| KDFTPAAQAAAFQKV       | 1294.6426 | 647.02 | 2 ##### | 3.14 | 0.60 |
| KDGLAFNALIHRH         | 1226.6641 | 613.14 | 2 ##### | 2.53 | 0.38 |
| KDGVANVSIEDRV         | 1174.5698 | 587.10 | 2 ##### | 3.02 | 0.37 |
| KDGVANVSIEDRV         | 1174.5698 | 587.04 | 2 ##### | 3.36 | 0.49 |
| KDGVANVSIEDRV         | 1174.5698 | 587.07 | 2 ##### | 3.37 | 0.43 |
| KDIINEEEVQFLKT        | 1476.7581 | 738.23 | 2 ##### | 2.62 | 0.29 |
| KDIINEEEVQFLKT        | 1476.7581 | 738.20 | 2 ##### | 3.95 | 0.36 |
| KDIPVLVATDVAARG       | 1339.7579 | 669.66 | 2 ##### | 2.94 | 0.43 |
| KDISTNYYASQKK         | 1289.6008 | 644.57 | 2 ##### | 3.26 | 0.46 |
| KDISTNYYASQKK         | 1289.6008 | 644.54 | 2 ##### | 3.33 | 0.52 |
| KDISTNYYASQKK         | 1289.6008 | 644.56 | 2 ##### | 3.47 | 0.47 |
| KDISTNYYASQKK         | 1289.6008 | 644.52 | 2 ##### | 3.65 | 0.55 |
| KDISTNYYASQKK         | 1289.6008 | 644.51 | 2 ##### | 3.84 | 0.57 |
| KDISTNYYASQKK         | 1289.6008 | 644.53 | 2 ##### | 3.92 | 0.55 |
| KDISTNYYASQKKT        | 1417.6958 | 708.63 | 2 ##### | 2.52 | 0.44 |
| KDISTNYYASQKKT        | 1417.6958 | 708.62 | 2 ##### | 3.28 | 0.45 |
| KDISTNYYASQKKT        | 1417.6958 | 708.59 | 2 ##### | 3.30 | 0.52 |
| KDLGTDSQIFISRA        | 1351.6852 | 675.60 | 2 ##### | 3.57 | 0.49 |
| KDLGTDSQIFISRA        | 1351.6852 | 675.61 | 2 ##### | 3.91 | 0.47 |
| KDLLEVADILEKA         | 1257.6936 | 628.69 | 2 ##### | 2.68 | 0.32 |
| KDLLEVADILEKA         | 1257.6936 | 628.64 | 2 ##### | 3.52 | 0.42 |
| KDLLTAYYDVVYEKN       | 1607.7476 | 803.67 | 2 ##### | 3.04 | 0.40 |
| KDLLTAYYDVVYEKN       | 1607.7476 | 803.58 | 2 ##### | 3.71 | 0.59 |
| KDLLTAYYDVVYEKN       | 1607.7476 | 803.60 | 2 ##### | 3.92 | 0.54 |
| KDLSTVEALQNLKN        | 1330.7213 | 665.11 | 2 ##### | 3.08 | 0.50 |
| KDLSTVEALQNLKN        | 1330.7213 | 665.14 | 2 ##### | 3.31 | 0.44 |

|                     |           |        |         |      |      |
|---------------------|-----------|--------|---------|------|------|
| KDNDPPIAVAKI        | 1039.5419 | 519.60 | 2 ##### | 2.53 | 0.34 |
| KDNNQFASASLDRT      | 1337.6080 | 668.58 | 2 ##### | 2.93 | 0.46 |
| KDPQALSEHLKNPVIAQKI | 1888.0287 | 629.20 | 3 ##### | 3.39 | 0.41 |
| KDPQALSEHLKNPVIAQKI | 1888.0287 | 629.17 | 3 ##### | 3.65 | 0.53 |
| KDQVANSFAVERL       | 1235.6014 | 617.62 | 2 ##### | 2.87 | 0.35 |
| KDQVANSFAVERL       | 1235.6014 | 617.55 | 2 ##### | 3.30 | 0.50 |
| KDQVANSFAVERL       | 1235.6014 | 617.56 | 2 ##### | 3.32 | 0.49 |
| KDQVANSFAVERL       | 1235.6014 | 617.51 | 2 ##### | 3.52 | 0.58 |
| KDQVANSFAVERL       | 1235.6014 | 617.54 | 2 ##### | 3.55 | 0.53 |
| KDQVANSFAVERL       | 1235.6014 | 617.53 | 2 ##### | 3.86 | 0.55 |
| KDSYVGDEAQSKR       | 1198.5222 | 599.05 | 2 ##### | 2.59 | 0.41 |
| KDSYVGDEAQSKR       | 1198.5222 | 599.04 | 2 ##### | 2.74 | 0.44 |
| KDSYVGDEAQSKR       | 1198.5222 | 598.99 | 2 ##### | 2.79 | 0.53 |
| KDSYVGDEAQSKR       | 1198.5222 | 599.04 | 2 ##### | 2.98 | 0.43 |
| KDSYVGDEAQSKR       | 1198.5222 | 598.97 | 2 ##### | 3.09 | 0.58 |
| KDSYVGDEAQSKR       | 1198.5222 | 598.98 | 2 ##### | 3.15 | 0.55 |
| KDSYVGDEAQSKR       | 1198.5222 | 599.00 | 2 ##### | 3.22 | 0.52 |
| KDSYVGDEAQSKR       | 1198.5222 | 598.99 | 2 ##### | 3.32 | 0.55 |
| KDSYVGDEAQSKR       | 1198.5222 | 599.00 | 2 ##### | 3.51 | 0.52 |
| KDSYVGDEAQSKR       | 1198.5222 | 599.00 | 2 ##### | 3.54 | 0.53 |
| KDSYVGDEAQSKR       | 1198.5222 | 599.02 | 2 ##### | 3.57 | 0.48 |
| KDSYVGDEAQSKR       | 1198.5222 | 598.98 | 2 ##### | 3.58 | 0.55 |
| KDSYVGDEAQSKR       | 1198.5222 | 598.99 | 2 ##### | 3.60 | 0.55 |
| KDSYVGDEAQSKR       | 1198.5222 | 598.98 | 2 ##### | 3.66 | 0.57 |
| KDSYVGDEAQSKRG      | 1354.6233 | 677.01 | 2 ##### | 3.15 | 0.60 |
| KDSYVGDEAQSKRG      | 1354.6233 | 677.04 | 2 ##### | 3.54 | 0.54 |
| KDTGKTPVEPEVAIHRI   | 1648.8654 | 549.44 | 3 ##### | 3.78 | 0.54 |
| KDTGKTPVEPEVAIHRI   | 1648.8654 | 549.45 | 3 ##### | 3.85 | 0.51 |
| KDTGKTPVEPEVAIHRI   | 1648.8654 | 549.46 | 3 ##### | 3.98 | 0.47 |
| KDTNGSQFFITTVKT     | 1457.7271 | 728.72 | 2 ##### | 2.88 | 0.28 |
| KDTTASAVAVGLRQ      | 1160.6270 | 580.14 | 2 ##### | 3.67 | 0.35 |
| KDTTASAVAVGLRQ      | 1160.6270 | 580.13 | 2 ##### | 3.70 | 0.36 |
| KDVLSVAFSSDNRQ      | 1309.6383 | 654.57 | 2 ##### | 3.17 | 0.50 |
| KDVLSVAFSSDNRQ      | 1309.6383 | 654.52 | 2 ##### | 3.32 | 0.59 |
| KDVLSVAFSSDNRQ      | 1309.6383 | 654.53 | 2 ##### | 4.40 | 0.57 |
| KDVNAAIATIKT        | 1015.5782 | 507.62 | 2 ##### | 2.62 | 0.34 |
| KDVNAAIATIKT        | 1015.5782 | 507.55 | 2 ##### | 2.64 | 0.48 |
| KDVNAAIATIKT        | 1015.5782 | 507.59 | 2 ##### | 2.80 | 0.40 |
| KDVNAAIATIKT        | 1015.5782 | 507.56 | 2 ##### | 2.90 | 0.46 |
| KDVNAAIATIKT        | 1015.5782 | 507.57 | 2 ##### | 2.93 | 0.44 |
| KDVNAAIATIKT        | 1015.5782 | 507.56 | 2 ##### | 3.12 | 0.46 |
| KDVNAAIATIKT        | 1015.5782 | 507.57 | 2 ##### | 3.32 | 0.44 |
| KDVNAAIATIKT        | 1015.5782 | 507.55 | 2 ##### | 3.36 | 0.47 |
| KDVNAAIATIKT        | 1015.5782 | 507.56 | 2 ##### | 3.48 | 0.45 |
| KDVSTTLNADEAVARG    | 1461.7180 | 730.62 | 2 ##### | 3.08 | 0.47 |
| KDVSTTLNADEAVARG    | 1461.7180 | 730.67 | 2 ##### | 3.15 | 0.39 |
| KDVTGAEALLERH       | 1173.6110 | 586.61 | 2 ##### | 3.22 | 0.39 |
| KDVTGAEALLERH       | 1173.6110 | 586.59 | 2 ##### | 3.48 | 0.42 |
| KDYIVVGSDSGRI       | 1167.5641 | 583.58 | 2 ##### | 2.56 | 0.40 |
| KEAAENSLVAYKA       | 1194.6001 | 597.07 | 2 ##### | 2.57 | 0.45 |
| KEAAENSLVAYKA       | 1194.6001 | 597.12 | 2 ##### | 2.64 | 0.36 |
| KEAAENSLVAYKA       | 1194.6001 | 597.05 | 2 ##### | 2.81 | 0.50 |
| KEAAENSLVAYKA       | 1194.6001 | 597.07 | 2 ##### | 2.85 | 0.45 |
| KEAATVEELNPKG       | 1200.6107 | 600.16 | 2 ##### | 2.58 | 0.29 |
| KEAATVEELNPKG       | 1200.6107 | 600.14 | 2 ##### | 2.91 | 0.32 |
| KEAATVEELNPKG       | 1200.6107 | 600.10 | 2 ##### | 3.06 | 0.41 |

|                        |           |         |         |      |      |
|------------------------|-----------|---------|---------|------|------|
| KEAFQEALAAAGDKL        | 1320.6431 | 660.14  | 2 ##### | 2.59 | 0.37 |
| KEAFQEALAAAGDKL        | 1320.6431 | 660.10  | 2 ##### | 3.30 | 0.44 |
| KEAFQEALAAAGDKL        | 1320.6431 | 660.07  | 2 ##### | 3.48 | 0.51 |
| KEAFQEALAAAGDKL        | 1320.6431 | 660.08  | 2 ##### | 3.51 | 0.48 |
| KEAFQEALAAAGDKL        | 1320.6431 | 660.07  | 2 ##### | 3.72 | 0.50 |
| KEAFQEALAAAGDKL        | 1320.6431 | 660.08  | 2 ##### | 3.75 | 0.49 |
| KEAFQEALAAAGDKL        | 1320.6431 | 660.06  | 2 ##### | 3.84 | 0.52 |
| KEAFQEALAAAGDKL        | 1320.6431 | 660.05  | 2 ##### | 3.89 | 0.55 |
| KEAFQEALAAAGDKL        | 1320.6431 | 660.03  | 2 ##### | 4.26 | 0.57 |
| KEAFQEALAAAGDKL        | 1320.6431 | 660.06  | 2 ##### | 4.43 | 0.53 |
| KEAINVEQAFQTIARN       | 1589.8282 | 794.66  | 2 ##### | 3.44 | 0.50 |
| KEAINVEQAFQTIARN       | 1589.8282 | 794.67  | 2 ##### | 3.46 | 0.49 |
| KEAINVEQAFQTIARN       | 1589.8282 | 794.65  | 2 ##### | 3.47 | 0.53 |
| KEAINVEQAFQTIARN       | 1589.8282 | 794.67  | 2 ##### | 3.48 | 0.48 |
| KEAINVEQAFQTIARN       | 1589.8282 | 794.71  | 2 ##### | 3.76 | 0.40 |
| KEALQDVEDENQ           | 1289.5492 | 644.62  | 2 ##### | 3.01 | 0.32 |
| KEALQDVEDENQ           | 1289.5492 | 644.57  | 2 ##### | 3.12 | 0.40 |
| KEALQDVEDENQ           | 1289.5492 | 644.60  | 2 ##### | 3.30 | 0.36 |
| KEDQTEYLEERR           | 1311.5699 | 655.55  | 2 ##### | 2.82 | 0.48 |
| KEDQTEYLEERR           | 1311.5699 | 655.71  | 2 ##### | 3.10 | 0.14 |
| KEDQTEYLEERR           | 1311.5699 | 655.57  | 2 ##### | 3.27 | 0.42 |
| KEEASDYLELDTIKN        | 1525.7268 | 762.62  | 2 ##### | 3.09 | 0.48 |
| KEFADSLGIPFLETSAKN     | 1724.8741 | 862.18  | 2 ##### | 3.17 | 0.52 |
| KEFADSLGIPFLETSAKN     | 1724.8741 | 862.21  | 2 ##### | 3.57 | 0.46 |
| KEFADSLGIPFLETSAKN     | 1724.8741 | 862.17  | 2 ##### | 3.88 | 0.53 |
| KEFADSLGIPFLETSAKN     | 1724.8741 | 862.15  | 2 ##### | 3.98 | 0.57 |
| KEFADSLGIPFLETSAKN     | 1724.8741 | 862.15  | 2 ##### | 4.20 | 0.58 |
| KEGGLGPLNIPLLDVTKS     | 1706.9688 | 853.21  | 2 ##### | 3.39 | 0.55 |
| KEGGLGPLNIPLLDVTKS     | 1706.9688 | 853.20  | 2 ##### | 3.84 | 0.57 |
| KEGGLGPLNIPLLDVTKS     | 1706.9688 | 853.19  | 2 ##### | 4.27 | 0.58 |
| KEGGLGPLNIPLLDVTKS     | 1706.9688 | 853.18  | 2 ##### | 4.35 | 0.60 |
| KEGGLGPLNIPLLDVTKS     | 1706.9688 | 853.17  | 2 ##### | 4.44 | 0.62 |
| KEGIPALDNFLDKL         | 1444.7682 | 722.13  | 2 ##### | 2.92 | 0.51 |
| KEGLELPEDEEEKKK        | 1544.7327 | 772.26  | 2 ##### | 2.53 | 0.21 |
| KEGLELPEDEEEKKK        | 1544.7327 | 772.23  | 2 ##### | 2.62 | 0.28 |
| KEGLELPEDEEEKKK        | 1544.7327 | 772.24  | 2 ##### | 2.70 | 0.26 |
| KEGLELPEDEEEKKK        | 1544.7327 | 772.25  | 2 ##### | 2.80 | 0.23 |
| KEGPAVVGQFIQDVKN       | 1486.7900 | 743.21  | 2 ##### | 2.87 | 0.37 |
| KEGPAVVGQFIQDVKN       | 1486.7900 | 743.20  | 2 ##### | 2.87 | 0.39 |
| KEGPAVVGQFIQDVKN       | 1486.7900 | 743.19  | 2 ##### | 2.93 | 0.42 |
| KEGPAVVGQFIQDVKN       | 1486.7900 | 743.16  | 2 ##### | 3.40 | 0.47 |
| KEGTGSTATSSGSAGGAVGKG  | 1581.7351 | 790.56  | 2 ##### | 3.34 | 0.62 |
| KEGTGSTATSSGSAGGAVGKG  | 1581.7351 | 790.61  | 2 ##### | 3.36 | 0.51 |
| KEGTGSTATSSGSAGGAVGKG  | 1581.7351 | 790.56  | 2 ##### | 3.36 | 0.61 |
| KEGTGSTATSSGSAGGAVGKG  | 1581.7351 | 790.58  | 2 ##### | 3.53 | 0.57 |
| KEGTGSTATSSGSAGGAVGKG  | 1581.7351 | 790.57  | 2 ##### | 4.04 | 0.59 |
| KEILVGDVGGTVDDPYTTFVKM | 2196.1072 | 1097.76 | 2 ##### | 4.99 | 0.59 |
| KELEEEVSNFQKK          | 1351.6376 | 675.61  | 2 ##### | 3.32 | 0.42 |
| KELEEEVSNFQKK          | 1351.6376 | 675.60  | 2 ##### | 3.34 | 0.43 |
| KELEEEVSNFQKK          | 1351.6376 | 675.66  | 2 ##### | 3.44 | 0.31 |
| KELEEEVSNFQKK          | 1351.6376 | 675.60  | 2 ##### | 3.56 | 0.43 |
| KELEEIVQPIISKL         | 1397.7886 | 698.72  | 2 ##### | 2.55 | 0.36 |
| KELEEIVQPIISKL         | 1397.7886 | 698.68  | 2 ##### | 2.59 | 0.43 |
| KELEEIVQPIISKL         | 1397.7886 | 698.74  | 2 ##### | 2.69 | 0.31 |
| KELEEIVQPIISKL         | 1397.7886 | 698.72  | 2 ##### | 2.69 | 0.34 |
| KELEEIVQPIISKL         | 1397.7886 | 698.69  | 2 ##### | 2.70 | 0.41 |

|                    |           |        |         |      |      |
|--------------------|-----------|--------|---------|------|------|
| KELEEIVQPIISKL     | 1397.7886 | 698.73 | 2 ##### | 2.71 | 0.32 |
| KELEEIVQPIISKL     | 1397.7886 | 698.65 | 2 ##### | 2.78 | 0.48 |
| KELEEIVQPIISKL     | 1397.7886 | 698.73 | 2 ##### | 2.80 | 0.34 |
| KELEEIVQPIISKL     | 1397.7886 | 698.71 | 2 ##### | 2.86 | 0.37 |
| KELEEIVQPIISKL     | 1397.7886 | 698.73 | 2 ##### | 2.93 | 0.33 |
| KELEEIVQPIISKL     | 1397.7886 | 698.72 | 2 ##### | 2.94 | 0.34 |
| KELEEIVQPIISKL     | 1397.7886 | 698.73 | 2 ##### | 3.12 | 0.33 |
| KELEEIVQPIISKL     | 1397.7886 | 698.68 | 2 ##### | 3.21 | 0.43 |
| KELEEIVQPIISKL     | 1397.7886 | 698.66 | 2 ##### | 3.21 | 0.46 |
| KELEEIVQPIISKL     | 1397.7886 | 698.73 | 2 ##### | 3.23 | 0.33 |
| KELEEIVQPIISKL     | 1397.7886 | 698.70 | 2 ##### | 3.39 | 0.39 |
| KELEEIVQPIISKL     | 1397.7886 | 698.67 | 2 ##### | 3.46 | 0.45 |
| KELEEIVQPIISKL     | 1397.7886 | 698.67 | 2 ##### | 3.73 | 0.45 |
| KELEEIVQPIISKL     | 1397.7886 | 698.64 | 2 ##### | 3.73 | 0.51 |
| KELEEIVQPIISKL     | 1397.7886 | 698.64 | 2 ##### | 3.78 | 0.50 |
| KELEEIVQPIISKL     | 1397.7886 | 698.65 | 2 ##### | 3.83 | 0.49 |
| KELEEIVQPIISKL     | 1397.7886 | 698.67 | 2 ##### | 3.92 | 0.45 |
| KELEEIVQPIISKL     | 1397.7886 | 698.68 | 2 ##### | 4.01 | 0.42 |
| KELEEIVQPIISKL     | 1397.7886 | 698.66 | 2 ##### | 4.01 | 0.47 |
| KELEEIVQPIISKL     | 1397.7886 | 698.66 | 2 ##### | 4.09 | 0.46 |
| KELEEIVQPIISKL     | 1397.7886 | 698.64 | 2 ##### | 4.09 | 0.51 |
| KELEEIVQPIISKL     | 1397.7886 | 698.66 | 2 ##### | 4.13 | 0.47 |
| KELEEIVQPIISKL     | 1397.7886 | 698.67 | 2 ##### | 4.21 | 0.44 |
| KELLLQPVTISRN      | 1268.7572 | 634.26 | 2 ##### | 2.71 | 0.24 |
| KELLLQPVTISRN      | 1268.7572 | 634.25 | 2 ##### | 3.19 | 0.25 |
| KELLLQPVTISRN      | 1268.7572 | 634.25 | 2 ##### | 3.31 | 0.25 |
| KELLLQPVTISRN      | 1268.7572 | 634.17 | 2 ##### | 3.31 | 0.41 |
| KELLLQPVTISRN      | 1268.7572 | 634.22 | 2 ##### | 3.35 | 0.32 |
| KELSTTLNADEAVTRG   | 1519.7599 | 759.74 | 2 ##### | 2.96 | 0.27 |
| KELSTTLNADEAVTRG   | 1519.7599 | 759.64 | 2 ##### | 3.37 | 0.48 |
| KEVVEEAENGRD       | 1131.5277 | 565.64 | 2 ##### | 2.50 | 0.24 |
| KEVVEEAENGRD       | 1131.5277 | 565.57 | 2 ##### | 2.79 | 0.39 |
| KEVVEEAENGRD       | 1131.5277 | 565.64 | 2 ##### | 2.91 | 0.25 |
| KEVVEEAENGRD       | 1131.5277 | 565.56 | 2 ##### | 3.04 | 0.41 |
| KEVVEEAENGRD       | 1131.5277 | 565.53 | 2 ##### | 3.06 | 0.47 |
| KEVVEEAENGRD       | 1131.5277 | 565.53 | 2 ##### | 3.07 | 0.47 |
| KEVVEEAENGRD       | 1131.5277 | 565.56 | 2 ##### | 3.42 | 0.40 |
| KFAAATGATPIAGRF    | 1203.6481 | 601.61 | 2 ##### | 2.69 | 0.42 |
| KFAAATGATPIAGRF    | 1203.6481 | 601.60 | 2 ##### | 3.23 | 0.45 |
| KFAAATGATPIAGRF    | 1203.6481 | 601.55 | 2 ##### | 3.65 | 0.56 |
| KFAAATGATPIAGRF    | 1203.6481 | 601.55 | 2 ##### | 3.66 | 0.54 |
| KFAAATGATPIAGRF    | 1203.6481 | 601.57 | 2 ##### | 4.01 | 0.51 |
| KFATEAAITLRI       | 1205.6888 | 602.62 | 2 ##### | 2.59 | 0.45 |
| KFDASFFGVHPKQ      | 1251.6157 | 625.60 | 2 ##### | 2.57 | 0.41 |
| KFDASFFGVHPKQ      | 1251.6157 | 625.63 | 2 ##### | 2.62 | 0.35 |
| KFDASFFGVHPKQ      | 1251.6157 | 625.60 | 2 ##### | 2.67 | 0.41 |
| KFDASFFGVHPKQ      | 1251.6157 | 625.64 | 2 ##### | 2.69 | 0.34 |
| KFDASFFGVHPKQ      | 1251.6157 | 625.63 | 2 ##### | 2.90 | 0.36 |
| KFDASFFGVHPKQ      | 1251.6157 | 625.63 | 2 ##### | 2.97 | 0.35 |
| KFDASFFGVHPKQ      | 1251.6157 | 625.56 | 2 ##### | 3.15 | 0.49 |
| KFEDGDLTLYQSNAILRH | 1854.9232 | 927.20 | 2 ##### | 3.74 | 0.52 |
| KFEDGDLTLYQSNAILRH | 1854.9232 | 927.19 | 2 ##### | 4.13 | 0.54 |
| KFEDGDLTLYQSNAILRH | 1854.9232 | 927.19 | 2 ##### | 4.14 | 0.55 |
| KFGYVDFESAEDLEKA   | 1648.7377 | 824.07 | 2 ##### | 3.63 | 0.61 |
| KFGYVDFESAEDLEKA   | 1648.7377 | 824.09 | 2 ##### | 4.07 | 0.56 |
| KFGYVDFESAEDLEKA   | 1648.7377 | 824.07 | 2 ##### | 4.33 | 0.61 |



|                        |           |        |         |      |      |
|------------------------|-----------|--------|---------|------|------|
| KFGYVDFESAEDLEKA       | 1648.7377 | 824.06 | 2 ##### | 4.82 | 0.61 |
| KFIDEHATKRS            | 1116.5796 | 558.10 | 2 ##### | 2.53 | 0.39 |
| KFIDEHATKRS            | 1116.5796 | 558.13 | 2 ##### | 2.60 | 0.33 |
| KFIDEHATKRS            | 1116.5796 | 558.13 | 2 ##### | 2.68 | 0.32 |
| KFIDEHATKRS            | 1116.5796 | 558.07 | 2 ##### | 2.87 | 0.45 |
| KFISDKDASVVGFFRD       | 1587.8165 | 793.61 | 2 ##### | 4.35 | 0.60 |
| KFISDKDASVVGFFRD       | 1587.8165 | 793.64 | 2 ##### | 4.42 | 0.54 |
| KFISDKDASVVGFFRD       | 1587.8165 | 793.61 | 2 ##### | 4.75 | 0.59 |
| KFITHAPPGEFNEVFNDR     | 2089.0137 | 696.20 | 3 ##### | 3.53 | 0.40 |
| KFSLVDLAGNERG          | 1220.6270 | 610.23 | 2 ##### | 2.69 | 0.16 |
| KFSLVDLAGNERG          | 1220.6270 | 610.22 | 2 ##### | 2.71 | 0.19 |
| KFSLVDLAGNERG          | 1220.6270 | 610.24 | 2 ##### | 2.97 | 0.15 |
| KFSPAGPILSIRV          | 1157.6677 | 578.73 | 2 ##### | 2.54 | 0.21 |
| KFYEEVHDLERK           | 1336.6168 | 668.07 | 2 ##### | 2.68 | 0.48 |
| KFYEEVHDLERK           | 1336.6168 | 668.09 | 2 ##### | 2.71 | 0.44 |
| KFYEEVHDLERK           | 1336.6168 | 668.07 | 2 ##### | 2.73 | 0.47 |
| KFYEEVHDLERK           | 1336.6168 | 668.05 | 2 ##### | 2.83 | 0.51 |
| KFYEEVHDLERK           | 1336.6168 | 668.07 | 2 ##### | 2.85 | 0.47 |
| KFYEEVHDLERK           | 1336.6168 | 668.06 | 2 ##### | 3.01 | 0.50 |
| KGAAIEALNDGELQKA       | 1428.7329 | 714.17 | 2 ##### | 3.08 | 0.39 |
| KGADFLVTEVENGGSLGSKK   | 1779.8760 | 889.68 | 2 ##### | 3.07 | 0.52 |
| KGADFLVTEVENGGSLGSKK   | 1779.8760 | 889.79 | 2 ##### | 3.82 | 0.29 |
| KGADFLVTEVENGGSLGSKK   | 1779.8760 | 889.63 | 2 ##### | 4.26 | 0.61 |
| KGADFLVTEVENGGSLGSKK   | 1779.8760 | 889.71 | 2 ##### | 4.76 | 0.45 |
| KGADFLVTEVENGGSLGSKK   | 1779.8760 | 889.62 | 2 ##### | 5.89 | 0.64 |
| KGADFLVTEVENGGSLGSKK   | 1779.8760 | 889.67 | 2 ##### | 5.99 | 0.53 |
| KGADFLVTEVENGGSLGSKK   | 1779.8760 | 889.64 | 2 ##### | 6.12 | 0.60 |
| KGAEAAANVTGPGGVPVQGSKY | 1695.8661 | 847.75 | 2 ##### | 2.62 | 0.36 |
| KGAEAAANVTGPGGVPVQGSKY | 1695.8661 | 847.62 | 2 ##### | 4.25 | 0.63 |
| KGAEAAANVTGPGGVPVQGSKY | 1695.8661 | 847.62 | 2 ##### | 4.27 | 0.62 |
| KGAEAAANVTGPGGVPVQGSKY | 1695.8661 | 847.63 | 2 ##### | 4.50 | 0.60 |
| KGAEAAANVTGPGGVPVQGSKY | 1695.8661 | 847.63 | 2 ##### | 4.53 | 0.62 |
| KGAEAAANVTGPGGVPVQGSKY | 1695.8661 | 847.59 | 2 ##### | 4.53 | 0.69 |
| KGAEAAANVTGPGGVPVQGSKY | 1695.8661 | 847.61 | 2 ##### | 4.59 | 0.65 |
| KGAEADQIIEYLKQ         | 1349.6947 | 674.65 | 2 ##### | 2.98 | 0.40 |
| KGAEADQIIEYLKQ         | 1349.6947 | 674.67 | 2 ##### | 3.36 | 0.35 |
| KGAVDGGLSIPHSTKR       | 1338.7012 | 669.16 | 2 ##### | 3.17 | 0.38 |
| KGAVDGGLSIPHSTKR       | 1338.7012 | 669.09 | 2 ##### | 3.82 | 0.52 |
| KGAVDGGLSIPHSTKR       | 1338.7012 | 669.08 | 2 ##### | 4.24 | 0.53 |
| KGDATVSYEDPPTAKA       | 1450.6697 | 725.04 | 2 ##### | 3.40 | 0.59 |
| KGDATVSYEDPPTAKA       | 1450.6697 | 725.03 | 2 ##### | 3.43 | 0.62 |
| KGDATVSYEDPPTAKA       | 1450.6697 | 725.06 | 2 ##### | 3.45 | 0.55 |
| KGDVTITNDGATILKQ       | 1417.7533 | 708.80 | 2 ##### | 3.50 | 0.15 |
| KGDVTITNDGATILKQ       | 1417.7533 | 708.73 | 2 ##### | 3.73 | 0.29 |
| KGDVTTQVALQPALKF       | 1440.8057 | 720.22 | 2 ##### | 3.12 | 0.37 |
| KGFGFVDFNSEEDAKA       | 1561.6805 | 780.58 | 2 ##### | 3.57 | 0.51 |
| KGFGFVDFNSEEDAKA       | 1561.6805 | 780.72 | 2 ##### | 3.60 | 0.23 |
| KGFGFVDFNSEEDAKA       | 1561.6805 | 780.61 | 2 ##### | 3.71 | 0.47 |
| KGFGFVDFNSEEDAKA       | 1561.6805 | 780.62 | 2 ##### | 4.00 | 0.44 |
| KGFGFVDFNSEEDAKA       | 1561.6805 | 780.63 | 2 ##### | 4.25 | 0.41 |
| KGFGFVDFNSEEDAKA       | 1561.6805 | 780.55 | 2 ##### | 4.36 | 0.58 |
| KGFPTIYFSPANKK         | 1341.6837 | 670.76 | 2 ##### | 2.52 | 0.17 |
| KGFPTIYFSPANKK         | 1341.6837 | 670.69 | 2 ##### | 3.00 | 0.31 |
| KGFPTIYFSPANKK         | 1341.6837 | 670.75 | 2 ##### | 3.17 | 0.18 |
| KGFPTIYFSPANKK         | 1341.6837 | 670.74 | 2 ##### | 3.40 | 0.21 |
| KGFPTIYFSPANKK         | 1341.6837 | 670.65 | 2 ##### | 3.41 | 0.38 |

|                           |           |        |         |      |      |
|---------------------------|-----------|--------|---------|------|------|
| KGFPFIYFSPANKK            | 1341.6837 | 670.63 | 2 ##### | 3.54 | 0.42 |
| KGFPFIYFSPANKK            | 1341.6837 | 670.68 | 2 ##### | 3.64 | 0.32 |
| KGIDPFSLDALAKE            | 1246.6677 | 623.14 | 2 ##### | 2.67 | 0.39 |
| KGIDPFSLDALAKE            | 1246.6677 | 623.08 | 2 ##### | 2.79 | 0.50 |
| KGIHPTIISESFQKA           | 1456.7794 | 728.14 | 2 ##### | 2.75 | 0.51 |
| KGIHPTIISESFQKA           | 1456.7794 | 728.22 | 2 ##### | 2.76 | 0.34 |
| KGIHPTIISESFQKA           | 1456.7794 | 728.13 | 2 ##### | 2.82 | 0.52 |
| KGIHPTIISESFQKA           | 1456.7794 | 728.14 | 2 ##### | 2.82 | 0.51 |
| KGILAADESTGSIAKR          | 1332.7006 | 666.11 | 2 ##### | 3.07 | 0.47 |
| KGILAADESTGSIAKR          | 1332.7006 | 666.07 | 2 ##### | 3.27 | 0.55 |
| KGILAADESTGSIAKR          | 1332.7006 | 666.09 | 2 ##### | 3.36 | 0.52 |
| KGILAADESTGSIAKR          | 1332.7006 | 666.04 | 2 ##### | 3.61 | 0.63 |
| KGILAADESTGSIAKR          | 1332.7006 | 666.06 | 2 ##### | 3.80 | 0.59 |
| KGILAADESTGSIAKR          | 1332.7006 | 666.05 | 2 ##### | 3.84 | 0.60 |
| KGILAADESTGSIAKR          | 1332.7006 | 666.03 | 2 ##### | 3.86 | 0.64 |
| KGILAADESTGSIAKR          | 1332.7006 | 666.07 | 2 ##### | 3.95 | 0.57 |
| KGILAADESTGSIAKR          | 1332.7006 | 666.02 | 2 ##### | 4.12 | 0.66 |
| KGILAADESTGSIAKR          | 1332.7006 | 666.03 | 2 ##### | 4.37 | 0.64 |
| KGILAADESTGSIAKR          | 1332.7006 | 666.04 | 2 ##### | 4.41 | 0.62 |
| KGILAADESTGSIAKRL         | 1488.8016 | 744.15 | 2 ##### | 2.97 | 0.51 |
| KGILAADESTGSIAKRL         | 1488.8016 | 744.10 | 2 ##### | 3.43 | 0.60 |
| KGILAADESTGSIAKRL         | 1488.8016 | 744.13 | 2 ##### | 3.96 | 0.55 |
| KGLAITFVSDENDAKI          | 1479.7325 | 739.63 | 2 ##### | 2.80 | 0.47 |
| KGLAITFVSDENDAKI          | 1479.7325 | 739.59 | 2 ##### | 3.59 | 0.55 |
| KGLAITFVSDENDAKI          | 1479.7325 | 739.59 | 2 ##### | 3.68 | 0.56 |
| KGLAITFVSDENDAKI          | 1479.7325 | 739.57 | 2 ##### | 3.76 | 0.58 |
| KGLAITFVSDENDAKI          | 1479.7325 | 739.54 | 2 ##### | 4.09 | 0.64 |
| KGLAITFVSDENDAKI          | 1479.7325 | 739.55 | 2 ##### | 4.13 | 0.63 |
| KGLAVTFVSDENDAKI          | 1465.7169 | 732.65 | 2 ##### | 2.69 | 0.41 |
| KGLAVTFVSDENDAKI          | 1465.7169 | 732.59 | 2 ##### | 3.43 | 0.53 |
| KGLETIASDVVSLASKA         | 1489.8108 | 744.61 | 2 ##### | 2.93 | 0.59 |
| KGLSEDTEETLKE             | 1322.6322 | 661.07 | 2 ##### | 2.90 | 0.50 |
| KGLSEDTEETLKE             | 1322.6322 | 661.05 | 2 ##### | 2.93 | 0.54 |
| KGLSEDTEETLKE             | 1322.6322 | 661.06 | 2 ##### | 2.93 | 0.51 |
| KGLSEDTEETLKE             | 1322.6322 | 661.10 | 2 ##### | 3.19 | 0.44 |
| KGLSEDTEETLKE             | 1322.6322 | 661.03 | 2 ##### | 3.23 | 0.57 |
| KGLSEDTEETLKE             | 1322.6322 | 661.04 | 2 ##### | 3.30 | 0.55 |
| KGLSEDTEETLKE             | 1322.6322 | 661.03 | 2 ##### | 3.39 | 0.57 |
| KGLSEDTEETLKE             | 1322.6322 | 661.08 | 2 ##### | 3.44 | 0.46 |
| KGLSEDTEETLKE             | 1322.6322 | 661.04 | 2 ##### | 3.47 | 0.55 |
| KGLVAVVTGGASGLGLATAKR     | 1641.9534 | 820.73 | 2 ##### | 3.72 | 0.50 |
| KGLVAVVTGGASGLGLATAKR     | 1641.9534 | 820.70 | 2 ##### | 4.25 | 0.55 |
| KGPLQSVQVFRGK             | 1187.6531 | 593.58 | 2 ##### | 2.59 | 0.49 |
| KGPLQSVQVFRGK             | 1187.6531 | 593.56 | 2 ##### | 2.77 | 0.53 |
| KGPLQSVQVFRGK             | 1187.6531 | 593.57 | 2 ##### | 2.92 | 0.51 |
| KGPLQSVQVFRGK             | 1187.6531 | 593.58 | 2 ##### | 2.92 | 0.50 |
| KGPLQSVQVFRGK             | 1187.6531 | 593.58 | 2 ##### | 2.97 | 0.49 |
| KGPPDFSSDEEREPTVLGSGASVGF | 2543.2009 | 847.54 | 3 ##### | 3.68 | 0.58 |
| KGSFSEQGINEFLRE           | 1483.7175 | 741.60 | 2 ##### | 2.80 | 0.51 |
| KGSFSEQGINEFLRE           | 1483.7175 | 741.63 | 2 ##### | 2.97 | 0.46 |
| KGSFSEQGINEFLRE           | 1483.7175 | 741.62 | 2 ##### | 3.01 | 0.47 |
| KGSFSEQGINEFLRE           | 1483.7175 | 741.62 | 2 ##### | 3.45 | 0.48 |
| KSGSEEEEEIDIMELLKN        | 1691.8044 | 845.84 | 2 ##### | 2.62 | 0.12 |
| KSGSEEEEEIDIMELLKN        | 1691.8044 | 845.83 | 2 ##### | 2.65 | 0.15 |
| KSGSEEEEEIDIMELLKN        | 1691.8044 | 845.85 | 2 ##### | 2.67 | 0.11 |
| KSGSEEEEEIDIMELLKN        | 1691.8044 | 845.80 | 2 ##### | 2.69 | 0.21 |

|                           |           |         |         |      |      |
|---------------------------|-----------|---------|---------|------|------|
| KSGSEEEEEIDIMELLKN        | 1691.8044 | 845.80  | 2 ##### | 2.88 | 0.21 |
| KSGSEEEEEIDIMELLKN        | 1691.8044 | 845.83  | 2 ##### | 3.14 | 0.14 |
| KSGSEEEEEIDIMELLKN        | 1691.8044 | 845.84  | 2 ##### | 3.19 | 0.12 |
| KGTLISSEEGETEANNPKK       | 1888.9135 | 944.19  | 2 ##### | 3.21 | 0.53 |
| KGVDLVLNSLAEEKL           | 1386.7474 | 693.12  | 2 ##### | 3.35 | 0.51 |
| KGVNLPAAVDLPVSEKD         | 1636.8905 | 818.16  | 2 ##### | 3.40 | 0.56 |
| KGVVDSDDLPLNVSRE          | 1485.7544 | 742.73  | 2 ##### | 2.67 | 0.29 |
| KGVVDSDDLPLNVSRE          | 1485.7544 | 742.62  | 2 ##### | 3.05 | 0.52 |
| KGVVDSDDLPLNVSRE          | 1485.7544 | 742.64  | 2 ##### | 3.18 | 0.48 |
| KGVVDSDDLPLNVSRE          | 1485.7544 | 742.65  | 2 ##### | 3.24 | 0.46 |
| KGVVDSDDLPLNVSRE          | 1485.7544 | 742.63  | 2 ##### | 3.27 | 0.50 |
| KGVVDSDDLPLNVSRE          | 1485.7544 | 742.63  | 2 ##### | 3.59 | 0.49 |
| KGVVDSDDLPLNVSRE          | 1485.7544 | 742.58  | 2 ##### | 3.84 | 0.60 |
| KGVVDSDDLPLNVSRE          | 1485.7544 | 742.59  | 2 ##### | 4.62 | 0.58 |
| KGVVDSDDLPLNVSRE          | 1485.7544 | 742.61  | 2 ##### | 4.83 | 0.53 |
| KGVEVTHDLQKH              | 1224.6583 | 612.17  | 2 ##### | 2.88 | 0.32 |
| KGVEVTHDLQKH              | 1224.6583 | 612.14  | 2 ##### | 2.89 | 0.39 |
| KGVEVTHDLQKH              | 1224.6583 | 612.15  | 2 ##### | 3.02 | 0.37 |
| KGVEVTHDLQKH              | 1224.6583 | 612.17  | 2 ##### | 3.02 | 0.32 |
| KGVEVTHDLQKH              | 1224.6583 | 612.16  | 2 ##### | 3.07 | 0.33 |
| KGVEVTHDLQKH              | 1224.6583 | 612.17  | 2 ##### | 3.13 | 0.32 |
| KGVEVTHDLQKH              | 1224.6583 | 612.17  | 2 ##### | 3.15 | 0.33 |
| KGVEVTHDLQKH              | 1224.6583 | 612.16  | 2 ##### | 3.25 | 0.34 |
| KGVEVTHDLQKH              | 1224.6583 | 612.15  | 2 ##### | 3.41 | 0.36 |
| KGVEVTHDLQKH              | 1224.6583 | 612.12  | 2 ##### | 3.48 | 0.42 |
| KGVEVTHDLQKH              | 1224.6583 | 612.14  | 2 ##### | 3.52 | 0.38 |
| KGVVPLAGTNGETTTQGLDGLSERC | 2272.1416 | 1135.77 | 2 ##### | 3.27 | 0.60 |
| KGVVPLAGTNGETTTQGLDGLSERC | 2272.1416 | 1135.72 | 2 ##### | 3.75 | 0.69 |
| KGVVPLAGTNGETTTQGLDGLSERC | 2272.1416 | 1135.73 | 2 ##### | 3.88 | 0.68 |
| KGVVPLAGTNGETTTQGLDGLSERC | 2272.1416 | 1135.78 | 2 ##### | 3.89 | 0.59 |
| KGYDVIAQAQSGTGKT          | 1394.6910 | 697.09  | 2 ##### | 2.84 | 0.51 |
| KGYDVIAQAQSGTGKT          | 1394.6910 | 697.07  | 2 ##### | 3.02 | 0.54 |
| KGYDVIAQAQSGTGKT          | 1394.6910 | 697.05  | 2 ##### | 3.98 | 0.59 |
| KGYDVIAQAQSGTGKT          | 1394.6910 | 697.04  | 2 ##### | 4.89 | 0.61 |
| KGYDVIAQAQSGTGKT          | 1394.6910 | 697.01  | 2 ##### | 4.91 | 0.68 |
| KGYDVIAQAQSGTGKT          | 1394.6910 | 697.02  | 2 ##### | 4.94 | 0.64 |
| KGYDVIAQAQSGTGKT          | 1394.6910 | 697.00  | 2 ##### | 5.02 | 0.68 |
| KGYDVIAQAQSGTGKT          | 1394.6910 | 697.03  | 2 ##### | 5.16 | 0.64 |
| KGYDVIAQAQSGTGKT          | 1394.6910 | 697.01  | 2 ##### | 5.25 | 0.67 |
| KHALIYDDLSKQ              | 1287.6943 | 643.57  | 2 ##### | 2.75 | 0.55 |
| KHALIYDDLSKQ              | 1287.6943 | 643.56  | 2 ##### | 3.01 | 0.57 |
| KHALIYDDLSKQ              | 1287.6943 | 643.54  | 2 ##### | 3.10 | 0.62 |
| KHALIYDDLSKQ              | 1287.6943 | 643.56  | 2 ##### | 3.17 | 0.58 |
| KHALIYDDLSKQ              | 1287.6943 | 643.54  | 2 ##### | 3.20 | 0.61 |
| KHALIYDDLSKQ              | 1287.6943 | 643.56  | 2 ##### | 3.24 | 0.57 |
| KHALIYDDLSKQ              | 1287.6943 | 643.54  | 2 ##### | 3.25 | 0.61 |
| KHALIYDDLSKQ              | 1287.6943 | 643.54  | 2 ##### | 3.32 | 0.62 |
| KHALIYDDLSKQ              | 1287.6943 | 643.56  | 2 ##### | 3.36 | 0.58 |
| KHALIYDDLSKQ              | 1287.6943 | 643.56  | 2 ##### | 3.37 | 0.57 |
| KHEKEDGAISTIVLRG          | 1567.8439 | 783.66  | 2 ##### | 3.06 | 0.52 |
| KHEKEDGAISTIVLRG          | 1567.8439 | 783.64  | 2 ##### | 3.90 | 0.56 |
| KHGEIDYEAIVKL             | 1273.6423 | 636.55  | 2 ##### | 3.23 | 0.54 |
| KHGEIDYEAIVKL             | 1273.6423 | 636.53  | 2 ##### | 3.34 | 0.58 |
| KHGEIDYEAIVKL             | 1273.6423 | 636.53  | 2 ##### | 3.54 | 0.57 |
| KHLAGLGLTEAIDKN           | 1337.7423 | 668.78  | 2 ##### | 2.70 | 0.19 |
| KHLAGLGLTEAIDKN           | 1337.7423 | 668.74  | 2 ##### | 3.16 | 0.27 |

|                    |           |        |         |      |      |
|--------------------|-----------|--------|---------|------|------|
| KHLAGLGLTEAIDKN    | 1337.7423 | 668.65 | 2 ##### | 3.17 | 0.44 |
| KHLAGLGLTEAIDKN    | 1337.7423 | 668.66 | 2 ##### | 3.31 | 0.43 |
| KHLAGLGLTEAIDKN    | 1337.7423 | 668.69 | 2 ##### | 3.43 | 0.36 |
| KHLAGLGLTEAIDKNKA  | 1579.8802 | 789.73 | 2 ##### | 2.72 | 0.42 |
| KHLAGLGLTEAIDKNKA  | 1579.8802 | 526.48 | 3 ##### | 3.55 | 0.43 |
| KHLAGLGLTEAIDKNKA  | 1579.8802 | 526.47 | 3 ##### | 3.56 | 0.47 |
| KHLAGLGLTEAIDKNKA  | 1579.8802 | 789.63 | 2 ##### | 4.20 | 0.61 |
| KHLAGLGLTEAIDKNKA  | 1579.8802 | 789.72 | 2 ##### | 4.23 | 0.43 |
| KHLAGLGLTEAIDKNKA  | 1579.8802 | 789.67 | 2 ##### | 4.55 | 0.54 |
| KHLAGLGLTEAIDKNKA  | 1579.8802 | 789.66 | 2 ##### | 4.71 | 0.56 |
| KHLAGLGLTEAIDKNKA  | 1579.8802 | 789.63 | 2 ##### | 4.72 | 0.62 |
| KHLAGLGLTEAIDKNKA  | 1579.8802 | 789.64 | 2 ##### | 4.79 | 0.59 |
| KHLAGLGLTEAIDKNKA  | 1579.8802 | 526.44 | 3 ##### | 4.84 | 0.56 |
| KHLAGLGLTEAIDKNKA  | 1579.8802 | 526.43 | 3 ##### | 5.00 | 0.60 |
| KHLAGLGLTEAIDKNKA  | 1579.8802 | 789.65 | 2 ##### | 5.02 | 0.58 |
| KHLAGLGLTEAIDKNKA  | 1579.8802 | 526.42 | 3 ##### | 5.03 | 0.61 |
| KHLEINPDHPIVETLRQ  | 1782.9497 | 594.18 | 3 ##### | 3.09 | 0.42 |
| KHLEINPDHPIVETLRQ  | 1782.9497 | 594.16 | 3 ##### | 3.11 | 0.48 |
| KHLEINPDHPIVETLRQ  | 1782.9497 | 594.15 | 3 ##### | 3.31 | 0.49 |
| KHLEINPDHPIVETLRQ  | 1782.9497 | 594.15 | 3 ##### | 3.48 | 0.49 |
| KHLEINPDHPIVETLRQ  | 1782.9497 | 594.13 | 3 ##### | 3.60 | 0.55 |
| KHLEINPDHPIVETLRQ  | 1782.9497 | 594.14 | 3 ##### | 3.81 | 0.53 |
| KHLEINPDHPIVETLRQ  | 1782.9497 | 594.13 | 3 ##### | 4.06 | 0.55 |
| KHLEINPDHPIVETLRQ  | 1782.9497 | 594.11 | 3 ##### | 4.26 | 0.62 |
| KHLEINPDHPIVETLRQ  | 1782.9497 | 594.11 | 3 ##### | 4.30 | 0.61 |
| KHLEINPDHPIVETLRQ  | 1782.9497 | 891.17 | 2 ##### | 4.32 | 0.60 |
| KHLEINPDHPIVETLRQ  | 1782.9497 | 594.10 | 3 ##### | 4.35 | 0.64 |
| KHLEINPDHPIVETLRQ  | 1782.9497 | 891.18 | 2 ##### | 4.67 | 0.60 |
| KHLEINPDHSIETLRQ   | 1786.9446 | 595.46 | 3 ##### | 3.01 | 0.56 |
| KHLEINPDHSIETLRQ   | 1786.9446 | 595.48 | 3 ##### | 3.22 | 0.51 |
| KHLEINPDHSIETLRQ   | 1786.9446 | 893.19 | 2 ##### | 4.11 | 0.56 |
| KHLEINPDHSIETLRQ   | 1786.9446 | 893.20 | 2 ##### | 4.28 | 0.54 |
| KHLIPAANTGESKV     | 1237.6536 | 618.74 | 2 ##### | 2.55 | 0.17 |
| KHLIPAANTGESKV     | 1237.6536 | 618.66 | 2 ##### | 2.62 | 0.34 |
| KHLIPAANTGESKV     | 1237.6536 | 618.63 | 2 ##### | 2.72 | 0.39 |
| KHLIPAANTGESKV     | 1237.6536 | 618.60 | 2 ##### | 2.78 | 0.45 |
| KHLIPAANTGESKV     | 1237.6536 | 618.58 | 2 ##### | 2.95 | 0.49 |
| KHLIPAANTGESKV     | 1237.6536 | 618.65 | 2 ##### | 2.98 | 0.35 |
| KHLIPAANTGESKV     | 1237.6536 | 618.60 | 2 ##### | 3.02 | 0.46 |
| KHLSVNDLPVGRS      | 1206.6589 | 603.06 | 2 ##### | 2.53 | 0.53 |
| KHNNQQALSHSIEEGLKI | 1804.8937 | 601.47 | 3 ##### | 3.65 | 0.48 |
| KHNNQQALSHSIEEGLKI | 1804.8937 | 601.46 | 3 ##### | 3.70 | 0.51 |
| KHNNQQALSHSIEEGLKI | 1804.8937 | 601.47 | 3 ##### | 4.33 | 0.48 |
| KHNNQQALSHSIEEGLKI | 1804.8937 | 601.46 | 3 ##### | 4.77 | 0.53 |
| KHSGPNSADSANDGFVRL | 1630.7205 | 815.16 | 2 ##### | 2.54 | 0.41 |
| KIANPVEGSTDRQ      | 1158.5750 | 579.07 | 2 ##### | 2.52 | 0.44 |
| KIANPVEGSTDRQ      | 1158.5750 | 579.07 | 2 ##### | 2.56 | 0.43 |
| KIAQLEEQLDNETKE    | 1530.7646 | 765.08 | 2 ##### | 4.10 | 0.60 |
| KIAQLEEQLDNETKE    | 1530.7646 | 765.16 | 2 ##### | 4.24 | 0.44 |
| KIAQLEEQLDNETKE    | 1530.7646 | 765.09 | 2 ##### | 4.35 | 0.58 |
| KIAQLEEQLDNETKE    | 1530.7646 | 765.10 | 2 ##### | 4.55 | 0.57 |
| KIAQLEEQLDNETKE    | 1530.7646 | 765.14 | 2 ##### | 4.69 | 0.49 |
| KIDEPLEGSEDRI      | 1259.5750 | 629.59 | 2 ##### | 2.59 | 0.40 |
| KIDEPLEGSEDRI      | 1259.5750 | 629.53 | 2 ##### | 2.78 | 0.52 |
| KIDEPLEGSEDRI      | 1259.5750 | 629.62 | 2 ##### | 2.93 | 0.33 |
| KIDEPLEGSEDRI      | 1259.5750 | 629.58 | 2 ##### | 3.04 | 0.42 |

|                   |           |        |         |      |      |
|-------------------|-----------|--------|---------|------|------|
| KIDEPLEGSSEDRI    | 1259.5750 | 629.54 | 2 ##### | 3.12 | 0.49 |
| KIDEPLEGSSEDRI    | 1259.5750 | 629.51 | 2 ##### | 3.14 | 0.55 |
| KIDEPLEGSSEDRI    | 1259.5750 | 629.53 | 2 ##### | 3.17 | 0.51 |
| KIDEPLEGSSEDRI    | 1259.5750 | 629.57 | 2 ##### | 3.26 | 0.44 |
| KIDEPLEGSSEDRI    | 1259.5750 | 629.56 | 2 ##### | 3.29 | 0.45 |
| KIDEPLEGSSEDRI    | 1259.5750 | 629.54 | 2 ##### | 3.29 | 0.50 |
| KIDEPLEGSSEDRI    | 1259.5750 | 629.53 | 2 ##### | 3.35 | 0.51 |
| KIDEPLEGSSEDRI    | 1259.5750 | 629.53 | 2 ##### | 3.81 | 0.52 |
| KIEDLSQQAQLAAAQKF | 1614.8334 | 807.35 | 2 ##### | 2.83 | 0.13 |
| KIEDLSQQAQLAAAQKF | 1614.8334 | 807.26 | 2 ##### | 2.91 | 0.31 |
| KIEDLSQQAQLAAAQKF | 1614.8334 | 807.18 | 2 ##### | 4.12 | 0.47 |
| KIEDLSQQAQLAAAQKF | 1614.8334 | 807.15 | 2 ##### | 4.75 | 0.52 |
| KIEDLSQQAQLAAAQKF | 1614.8334 | 807.16 | 2 ##### | 4.76 | 0.51 |
| KIEDLSQQAQLAAAQKF | 1614.8334 | 807.18 | 2 ##### | 4.77 | 0.47 |
| KIEDLSQQAQLAAAQKF | 1614.8334 | 807.17 | 2 ##### | 4.87 | 0.49 |
| KIEDLSQQAQLAAAQKF | 1614.8334 | 807.17 | 2 ##### | 4.92 | 0.50 |
| KIEDLSQQAQLAAAQKF | 1614.8334 | 807.17 | 2 ##### | 4.92 | 0.50 |
| KIEDLSQQAQLAAAQKF | 1614.8334 | 807.17 | 2 ##### | 5.04 | 0.50 |
| KIEDLSQQAQLAAAQKF | 1614.8334 | 807.17 | 2 ##### | 5.14 | 0.50 |
| KIEDLSQQAQLAAAQKF | 1614.8334 | 807.16 | 2 ##### | 5.15 | 0.51 |
| KIEDLSQQAQLAAAQKF | 1614.8334 | 807.17 | 2 ##### | 5.21 | 0.49 |
| KIEDLSQQAQLAAAQKF | 1614.8334 | 807.18 | 2 ##### | 5.32 | 0.47 |
| KIEDLSQQAQLAAAQKF | 1614.8334 | 807.17 | 2 ##### | 5.53 | 0.50 |
| KIFGVTTLDIVRA     | 1233.7201 | 616.72 | 2 ##### | 2.60 | 0.27 |
| KIFGVTTLDIVRA     | 1233.7201 | 616.73 | 2 ##### | 2.64 | 0.25 |
| KIFGVTTLDIVRA     | 1233.7201 | 616.73 | 2 ##### | 2.65 | 0.25 |
| KIFGVTTLDIVRA     | 1233.7201 | 616.72 | 2 ##### | 2.69 | 0.28 |
| KIFGVTTLDIVRA     | 1233.7201 | 616.76 | 2 ##### | 2.74 | 0.21 |
| KIFGVTTLDIVRA     | 1233.7201 | 616.69 | 2 ##### | 3.17 | 0.33 |
| KIFVGGLNPEATEEKI  | 1503.7689 | 751.76 | 2 ##### | 2.55 | 0.25 |
| KIFVGGLNPEATEEKI  | 1503.7689 | 751.65 | 2 ##### | 3.18 | 0.46 |
| KIFVGGLNPEATEEKI  | 1503.7689 | 751.65 | 2 ##### | 3.52 | 0.46 |
| KIFVGGLNPEATEEKI  | 1503.7689 | 751.61 | 2 ##### | 3.53 | 0.55 |
| KIFVGGLNPEATEEKI  | 1503.7689 | 751.64 | 2 ##### | 3.65 | 0.49 |
| KIFVGGLNPEATEEKI  | 1503.7689 | 751.65 | 2 ##### | 3.87 | 0.48 |
| KIFVGGLNPEATEEKI  | 1503.7689 | 751.58 | 2 ##### | 3.95 | 0.62 |
| KIFVGGLNPEATEEKI  | 1503.7689 | 751.62 | 2 ##### | 4.05 | 0.53 |
| KIFVGGLNPEATEEKI  | 1503.7689 | 751.62 | 2 ##### | 4.13 | 0.53 |
| KIFVGGLNPEATEEKI  | 1503.7689 | 751.59 | 2 ##### | 4.17 | 0.58 |
| KIFVGGLNPEATEEKI  | 1503.7689 | 751.62 | 2 ##### | 4.32 | 0.54 |
| KIFVGGLSPDTPPEEKI | 1488.7581 | 744.21 | 2 ##### | 2.53 | 0.33 |
| KIFVGGLSPDTPPEEKI | 1488.7581 | 744.17 | 2 ##### | 2.66 | 0.42 |
| KIFVGGLSPDTPPEEKI | 1488.7581 | 744.26 | 2 ##### | 2.83 | 0.23 |
| KIFVGGLSPDTPPEEKI | 1488.7581 | 744.12 | 2 ##### | 3.14 | 0.51 |
| KIFVGGLSPDTPPEEKI | 1488.7581 | 744.14 | 2 ##### | 3.66 | 0.47 |
| KIFVGGLSPDTPPEEKI | 1488.7581 | 744.11 | 2 ##### | 3.93 | 0.54 |
| KIFVGGLSPDTPPEEKI | 1488.7581 | 744.11 | 2 ##### | 4.27 | 0.55 |
| KIGGHGAEYGAEALERM | 1529.7343 | 764.61 | 2 ##### | 3.38 | 0.51 |
| KIGGHGAEYGAEALERM | 1529.7343 | 509.81 | 3 ##### | 3.65 | 0.31 |
| KIGGHGAEYGAEALERM | 1529.7343 | 764.62 | 2 ##### | 3.92 | 0.49 |
| KIGGHGAEYGAEALERM | 1529.7343 | 764.59 | 2 ##### | 4.02 | 0.55 |
| KIGGHGAEYGAEALERM | 1529.7343 | 764.60 | 2 ##### | 4.07 | 0.54 |
| KIGGHGAEYGAEALERM | 1529.7343 | 764.61 | 2 ##### | 4.13 | 0.51 |
| KIGGHGAEYGAEALERM | 1529.7343 | 764.62 | 2 ##### | 4.17 | 0.50 |
| KIGGHGAEYGAEALERM | 1529.7343 | 764.59 | 2 ##### | 4.18 | 0.56 |
| KIGGHGAEYGAEALERM | 1529.7343 | 764.59 | 2 ##### | 4.21 | 0.55 |

|                      |           |        |         |      |      |
|----------------------|-----------|--------|---------|------|------|
| KIGGHGAEYGAEALERM    | 1529.7343 | 764.58 | 2 ##### | 4.23 | 0.57 |
| KIGGHGAEYGAEALERM    | 1529.7343 | 764.60 | 2 ##### | 4.28 | 0.54 |
| KIGGIGTVPVGRV        | 1025.6102 | 512.66 | 2 ##### | 2.53 | 0.29 |
| KIGGIGTVPVGRV        | 1025.6102 | 512.63 | 2 ##### | 2.55 | 0.36 |
| KIGGIGTVPVGRV        | 1025.6102 | 512.63 | 2 ##### | 2.63 | 0.36 |
| KIGGIGTVPVGRV        | 1025.6102 | 512.62 | 2 ##### | 2.65 | 0.38 |
| KIGGIGTVPVGRV        | 1025.6102 | 512.60 | 2 ##### | 2.70 | 0.42 |
| KIGGIGTVPVGRV        | 1025.6102 | 512.63 | 2 ##### | 2.81 | 0.34 |
| KIGGIGTVPVGRV        | 1025.6102 | 512.63 | 2 ##### | 2.83 | 0.36 |
| KIGGIGTVPVGRV        | 1025.6102 | 512.61 | 2 ##### | 2.92 | 0.38 |
| KIGIIGGTGLDDPEILEGRT | 1824.9702 | 912.38 | 2 ##### | 2.51 | 0.22 |
| KIGIIGGTGLDDPEILEGRT | 1824.9702 | 912.19 | 2 ##### | 3.97 | 0.58 |
| KIGIIGGTGLDDPEILEGRT | 1824.9702 | 912.16 | 2 ##### | 4.51 | 0.65 |
| KIGIIGGTGLDDPEILEGRT | 1824.9702 | 912.20 | 2 ##### | 4.64 | 0.56 |
| KIILDLISESPIKG       | 1340.8036 | 670.21 | 2 ##### | 2.64 | 0.38 |
| KIILDLISESPIKG       | 1340.8036 | 670.19 | 2 ##### | 2.71 | 0.43 |
| KIILDLISESPIKG       | 1340.8036 | 670.15 | 2 ##### | 3.31 | 0.50 |
| KIILDLISESPIKG       | 1340.8036 | 670.14 | 2 ##### | 3.56 | 0.52 |
| KIILDLISESPIKG       | 1340.8036 | 670.12 | 2 ##### | 3.62 | 0.57 |
| KIILDLISESPIKG       | 1340.8036 | 670.14 | 2 ##### | 3.77 | 0.51 |
| KIILDLISESPIKG       | 1340.8036 | 670.12 | 2 ##### | 3.83 | 0.56 |
| KIILDLISESPIKG       | 1340.8036 | 670.13 | 2 ##### | 3.89 | 0.55 |
| KIILDLISESPIKG       | 1340.8036 | 670.13 | 2 ##### | 3.93 | 0.54 |
| KIILDLISESPIKG       | 1340.8036 | 670.14 | 2 ##### | 4.05 | 0.52 |
| KIILDLISESPIKG       | 1340.8036 | 670.13 | 2 ##### | 4.13 | 0.54 |
| KIILDLISESPIKG       | 1340.8036 | 670.12 | 2 ##### | 4.18 | 0.56 |
| KIILDLISESPIKG       | 1340.8036 | 670.19 | 2 ##### | 4.62 | 0.42 |
| KIIQLDDYPKC          | 1217.6776 | 608.65 | 2 ##### | 2.76 | 0.38 |
| KIIQLDDYPKC          | 1217.6776 | 608.63 | 2 ##### | 2.95 | 0.42 |
| KIIQLDDYPKC          | 1217.6776 | 608.65 | 2 ##### | 3.36 | 0.38 |
| KIIQLDDYPKC          | 1217.6776 | 608.65 | 2 ##### | 3.42 | 0.37 |
| KIIQLDDYPKC          | 1217.6776 | 608.66 | 2 ##### | 3.44 | 0.35 |
| KIIQLDDYPKC          | 1217.6776 | 608.64 | 2 ##### | 3.48 | 0.40 |
| KIIVDELKQEVISTSSKA   | 1788.9954 | 596.17 | 3 ##### | 3.55 | 0.48 |
| KIIVDELKQEVISTSSKA   | 1788.9954 | 894.34 | 2 ##### | 3.85 | 0.31 |
| KIIVDELKQEVISTSSKA   | 1788.9954 | 894.25 | 2 ##### | 3.93 | 0.49 |
| KIIVDELKQEVISTSSKA   | 1788.9954 | 894.20 | 2 ##### | 4.10 | 0.59 |
| KIIVDELKQEVISTSSKA   | 1788.9954 | 894.20 | 2 ##### | 4.49 | 0.59 |
| KIIVDELKQEVISTSSKA   | 1788.9954 | 894.18 | 2 ##### | 4.92 | 0.64 |
| KIKGEHPGLSIGDVAKK    | 1520.8431 | 760.17 | 2 ##### | 3.05 | 0.51 |
| KIKGEHPGLSIGDVAKK    | 1520.8431 | 760.16 | 2 ##### | 3.07 | 0.53 |
| KIKGEHPGLSIGDVAKK    | 1520.8431 | 760.16 | 2 ##### | 3.18 | 0.52 |
| KIKGEHPGLSIGDVAKK    | 1520.8431 | 506.74 | 3 ##### | 3.23 | 0.61 |
| KIKGEHPGLSIGDVAKK    | 1520.8431 | 506.76 | 3 ##### | 3.25 | 0.55 |
| KIKGEHPGLSIGDVAKK    | 1520.8431 | 760.16 | 2 ##### | 3.37 | 0.51 |
| KIKGEHPGLSIGDVAKK    | 1520.8431 | 506.74 | 3 ##### | 3.58 | 0.62 |
| KIKGEHPGLSIGDVAKK    | 1520.8431 | 506.75 | 3 ##### | 3.65 | 0.59 |
| KIKGEHPGLSIGDVAKK    | 1520.8431 | 760.17 | 2 ##### | 3.69 | 0.50 |
| KIKGEHPGLSIGDVAKK    | 1520.8431 | 506.81 | 3 ##### | 3.73 | 0.42 |
| KIKGEHPGLSIGDVAKK    | 1520.8431 | 760.15 | 2 ##### | 3.89 | 0.54 |
| KIKGEHPGLSIGDVAKK    | 1520.8431 | 760.19 | 2 ##### | 4.02 | 0.47 |
| KIKGEHPGLSIGDVAKK    | 1520.8431 | 760.17 | 2 ##### | 4.20 | 0.50 |
| KIKIEHPGLSIGDTAKK    | 1578.8850 | 789.15 | 2 ##### | 3.50 | 0.58 |
| KIKIEHPGLSIGDTAKK    | 1578.8850 | 789.15 | 2 ##### | 3.66 | 0.59 |
| KIKIEHPGLSIGDTAKK    | 1578.8850 | 789.17 | 2 ##### | 3.73 | 0.54 |
| KIKIEHPGLSIGDTAKK    | 1578.8850 | 789.11 | 2 ##### | 3.75 | 0.67 |

|                       |           |         |         |      |      |
|-----------------------|-----------|---------|---------|------|------|
| KILATPPQEDAPSVDIANIRM | 2020.0709 | 1009.79 | 2 ##### | 2.69 | 0.50 |
| KILATPPQEDAPSVDIANIRM | 2020.0709 | 1009.78 | 2 ##### | 4.01 | 0.52 |
| KILATPPQEDAPSVDIANIRM | 2020.0709 | 1009.74 | 2 ##### | 4.10 | 0.59 |
| KILATPPQEDAPSVDIANIRM | 2020.0709 | 1009.72 | 2 ##### | 4.24 | 0.63 |
| KILATPPQEDAPSVDIANIRM | 2020.0709 | 1009.76 | 2 ##### | 4.38 | 0.54 |
| KILATPPQEDAPSVDIANIRM | 2020.0709 | 1009.77 | 2 ##### | 4.60 | 0.53 |
| KILLAELEQLKG          | 1169.7140 | 584.74  | 2 ##### | 2.76 | 0.24 |
| KILLAELEQLKG          | 1169.7140 | 584.73  | 2 ##### | 2.82 | 0.26 |
| KILLAELEQLKG          | 1169.7140 | 584.73  | 2 ##### | 2.93 | 0.25 |
| KILLAELEQLKG          | 1169.7140 | 584.74  | 2 ##### | 2.99 | 0.23 |
| KILLAELEQLKG          | 1169.7140 | 584.70  | 2 ##### | 3.41 | 0.31 |
| KILLAELEQLKG          | 1169.7140 | 584.70  | 2 ##### | 3.46 | 0.31 |
| KILLAELEQLKG          | 1169.7140 | 584.71  | 2 ##### | 3.55 | 0.29 |
| KILLAELEQLKGQGKS      | 1539.9105 | 769.71  | 2 ##### | 3.50 | 0.49 |
| KILPTLEAVALGNKV       | 1409.8362 | 704.67  | 2 ##### | 3.50 | 0.49 |
| KILQDGGQLQVVEKQNSKE   | 1869.0439 | 934.41  | 2 ##### | 2.60 | 0.22 |
| KILTFDQLALESPKG       | 1474.8152 | 737.19  | 2 ##### | 4.03 | 0.44 |
| KILTFDQLALESPKG       | 1474.8152 | 737.17  | 2 ##### | 4.19 | 0.48 |
| KILTFDQLALESPKG       | 1474.8152 | 737.17  | 2 ##### | 4.35 | 0.47 |
| KILTFDQLALESPKG       | 1474.8152 | 737.20  | 2 ##### | 4.37 | 0.42 |
| KILTFDQLALESPKG       | 1474.8152 | 737.18  | 2 ##### | 4.59 | 0.45 |
| KINEVQTDVSVDTKH       | 1447.7275 | 723.68  | 2 ##### | 3.28 | 0.38 |
| KIPEGSVAVPATDAAPKR    | 1423.7428 | 711.59  | 2 ##### | 3.38 | 0.57 |
| KISSLLEEQQFQQGKL      | 1506.7799 | 753.18  | 2 ##### | 3.02 | 0.42 |
| KISSLLEEQQFQQGKL      | 1506.7799 | 753.18  | 2 ##### | 3.10 | 0.43 |
| KISSLLEEQQFQQGKL      | 1506.7799 | 753.18  | 2 ##### | 3.31 | 0.42 |
| KISSLLEEQQFQQGKL      | 1506.7799 | 753.17  | 2 ##### | 3.60 | 0.45 |
| KISSLLEEQQFQQGKL      | 1506.7799 | 753.16  | 2 ##### | 3.64 | 0.46 |
| KITDDQQESLNKW         | 1290.6172 | 645.15  | 2 ##### | 2.95 | 0.33 |
| KITDDQQESLNKW         | 1290.6172 | 645.09  | 2 ##### | 3.83 | 0.45 |
| KITDDQQESLNKW         | 1290.6172 | 645.08  | 2 ##### | 4.04 | 0.46 |
| KITDDQQESLNKW         | 1290.6172 | 645.11  | 2 ##### | 4.32 | 0.40 |
| KITEGDLSQLTASIRA      | 1503.8013 | 751.70  | 2 ##### | 3.76 | 0.41 |
| KITGEAFVQFASQELAeka   | 1867.9436 | 933.77  | 2 ##### | 4.30 | 0.40 |
| KITGEAFVQFASQELAeka   | 1867.9436 | 933.72  | 2 ##### | 4.52 | 0.50 |
| KITGEAFVQFASQELAeka   | 1867.9436 | 933.73  | 2 ##### | 4.97 | 0.49 |
| KITSEALLVTQQLVKV      | 1542.9102 | 771.34  | 2 ##### | 2.70 | 0.24 |
| KITSEALLVTQQLVKV      | 1542.9102 | 771.27  | 2 ##### | 2.75 | 0.37 |
| KIVADKDYSVTANSKI      | 1510.7748 | 503.41  | 3 ##### | 3.26 | 0.55 |
| KIVADKDYSVTANSKI      | 1510.7748 | 755.04  | 2 ##### | 3.98 | 0.69 |
| KIVADKDYSVTANSKI      | 1510.7748 | 755.06  | 2 ##### | 4.02 | 0.66 |
| KIVADKDYSVTANSKI      | 1510.7748 | 755.07  | 2 ##### | 4.11 | 0.63 |
| KIVADKDYSVTANSKI      | 1510.7748 | 755.05  | 2 ##### | 4.13 | 0.67 |
| KIVADKDYSVTANSKI      | 1510.7748 | 755.07  | 2 ##### | 4.59 | 0.64 |
| KIVNLQEVLSENEKK       | 1514.8060 | 757.20  | 2 ##### | 2.54 | 0.40 |
| KIVQAEGEAEEAAKM       | 1215.6216 | 607.63  | 2 ##### | 3.06 | 0.37 |
| KIVQAEGEAEEAAKM       | 1215.6216 | 607.53  | 2 ##### | 3.29 | 0.56 |
| KIVQAEGEAEEAAKM       | 1215.6216 | 607.61  | 2 ##### | 3.30 | 0.40 |
| KIVQAEGEAEEAAKM       | 1215.6216 | 607.55  | 2 ##### | 3.50 | 0.51 |
| KIVQAEGEAEEAAKM       | 1215.6216 | 607.57  | 2 ##### | 3.50 | 0.49 |
| KIVQAEGEAEEAAKM       | 1215.6216 | 607.54  | 2 ##### | 3.53 | 0.54 |
| KIVQAEGEAEEAAKM       | 1215.6216 | 607.49  | 2 ##### | 3.65 | 0.64 |
| KIVQAEGEAEEAAKM       | 1215.6216 | 607.53  | 2 ##### | 3.80 | 0.56 |
| KIVQAEGEAEEAAKM       | 1215.6216 | 607.52  | 2 ##### | 3.83 | 0.59 |
| KIVQAEGEAEEAAKM       | 1215.6216 | 607.55  | 2 ##### | 3.90 | 0.53 |
| KIVQAEGEAEEAAKM       | 1215.6216 | 607.57  | 2 ##### | 3.91 | 0.47 |

|                     |           |        |         |      |      |
|---------------------|-----------|--------|---------|------|------|
| KIVQAEGEAEAAKM      | 1215.6216 | 607.58 | 2 ##### | 3.96 | 0.46 |
| KIVQAEGEAEAAKM      | 1215.6216 | 607.50 | 2 ##### | 4.02 | 0.62 |
| KIVSNASCTTNCLAPLAKV | 1705.8612 | 852.75 | 2 ##### | 2.50 | 0.36 |
| KIVSNASCTTNCLAPLAKV | 1705.8612 | 852.76 | 2 ##### | 2.75 | 0.34 |
| KIVSNASCTTNCLAPLAKV | 1705.8612 | 852.75 | 2 ##### | 2.80 | 0.36 |
| KIVSNASCTTNCLAPLAKV | 1705.8612 | 852.79 | 2 ##### | 3.19 | 0.28 |
| KIVSNASCTTNCLAPLAKV | 1705.8612 | 852.74 | 2 ##### | 3.36 | 0.38 |
| KIVSNASCTTNCLAPLAKV | 1705.8612 | 852.71 | 2 ##### | 3.37 | 0.45 |
| KIVSNASCTTNCLAPLAKV | 1705.8612 | 852.69 | 2 ##### | 3.49 | 0.49 |
| KIVSNASCTTNCLAPLAKV | 1705.8612 | 852.66 | 2 ##### | 3.53 | 0.53 |
| KIVSNASCTTNCLAPLAKV | 1705.8612 | 852.70 | 2 ##### | 3.61 | 0.45 |
| KIVSNASCTTNCLAPLAKV | 1705.8612 | 852.68 | 2 ##### | 3.77 | 0.50 |
| KIVSNASCTTNCLAPLAKV | 1705.8612 | 852.66 | 2 ##### | 4.14 | 0.53 |
| KKDDEENYLDLFSHKN    | 1752.8075 | 584.18 | 3 ##### | 3.00 | 0.26 |
| KKDDEENYLDLFSHKN    | 1752.8075 | 584.18 | 3 ##### | 3.22 | 0.28 |
| KKDDEENYLDLFSHKN    | 1752.8075 | 584.15 | 3 ##### | 3.41 | 0.36 |
| KKEEELQGALARG       | 1243.6641 | 621.73 | 2 ##### | 2.65 | 0.20 |
| KKEEELQGALARG       | 1243.6641 | 621.73 | 2 ##### | 2.78 | 0.20 |
| KKEEELQGALARG       | 1243.6641 | 621.74 | 2 ##### | 3.09 | 0.18 |
| KKEEELQGALARG       | 1243.6641 | 621.73 | 2 ##### | 3.15 | 0.21 |
| KKEELTLEGIRQ        | 1187.6631 | 593.73 | 2 ##### | 2.59 | 0.20 |
| KKELSDIAHRI         | 1068.5796 | 534.13 | 2 ##### | 2.53 | 0.31 |
| KKELSDIAHRI         | 1068.5796 | 534.11 | 2 ##### | 2.55 | 0.36 |
| KKELSDIAHRI         | 1068.5796 | 534.15 | 2 ##### | 2.62 | 0.28 |
| KKELSDIAHRI         | 1068.5796 | 534.14 | 2 ##### | 2.74 | 0.31 |
| KKELSDIAHRI         | 1068.5796 | 534.10 | 2 ##### | 2.82 | 0.38 |
| KKHPDASVNFSEFSKK    | 1592.7704 | 796.30 | 2 ##### | 3.20 | 0.17 |
| KKHPDASVNFSEFSKK    | 1592.7704 | 530.77 | 3 ##### | 3.22 | 0.45 |
| KKHPDASVNFSEFSKK    | 1592.7704 | 530.80 | 3 ##### | 3.37 | 0.36 |
| KKHPDASVNFSEFSKK    | 1592.7704 | 530.83 | 3 ##### | 3.53 | 0.27 |
| KKHPDASVNFSEFSKK    | 1592.7704 | 530.78 | 3 ##### | 3.63 | 0.44 |
| KKHPDASVNFSEFSKK    | 1592.7704 | 796.30 | 2 ##### | 3.66 | 0.17 |
| KKLDEAVAEHLGKL      | 1380.7482 | 690.15 | 2 ##### | 2.94 | 0.45 |
| KKLDEAVAEHLGKL      | 1380.7482 | 690.06 | 2 ##### | 3.03 | 0.63 |
| KKLDEAVAEHLGKL      | 1380.7482 | 690.15 | 2 ##### | 3.36 | 0.44 |
| KKLDEAVAEHLGKL      | 1380.7482 | 690.10 | 2 ##### | 3.96 | 0.55 |
| KKLDEAVAEHLGKL      | 1380.7482 | 690.08 | 2 ##### | 4.05 | 0.59 |
| KKLDEAVAEHLGKL      | 1380.7482 | 690.10 | 2 ##### | 4.41 | 0.54 |
| KKLDEAVAEHLGKL      | 1380.7482 | 690.08 | 2 ##### | 4.54 | 0.58 |
| KKLEAAATALATKS      | 1187.6995 | 593.68 | 2 ##### | 2.93 | 0.35 |
| KKLEAAATALATKS      | 1187.6995 | 593.59 | 2 ##### | 3.58 | 0.52 |
| KKLEAAATALATKS      | 1187.6995 | 593.67 | 2 ##### | 3.74 | 0.36 |
| KKLEAAATALATKS      | 1187.6995 | 593.66 | 2 ##### | 3.76 | 0.39 |
| KKLEAAATALATKS      | 1187.6995 | 593.62 | 2 ##### | 3.79 | 0.46 |
| KKLEAAATALATKS      | 1187.6995 | 593.62 | 2 ##### | 3.80 | 0.46 |
| KKPLPDHVSIVEPKD     | 1458.8315 | 729.19 | 2 ##### | 2.89 | 0.44 |
| KKPLPDHVSIVEPKD     | 1458.8315 | 729.19 | 2 ##### | 3.24 | 0.46 |
| KKPLPDHVSIVEPKD     | 1458.8315 | 729.20 | 2 ##### | 3.24 | 0.43 |
| KKPLPDHVSIVEPKD     | 1458.8315 | 729.15 | 2 ##### | 3.33 | 0.52 |
| KKPLPDHVSIVEPKD     | 1458.8315 | 729.21 | 2 ##### | 3.33 | 0.40 |
| KKPVHPNDHVNKS       | 1284.6808 | 642.19 | 2 ##### | 2.61 | 0.30 |
| KKSDVEAIFSKY        | 1123.5994 | 561.64 | 2 ##### | 2.59 | 0.32 |
| KKSDVEAIFSKY        | 1123.5994 | 561.65 | 2 ##### | 2.73 | 0.29 |
| KKSDVEAIFSKY        | 1123.5994 | 561.71 | 2 ##### | 2.74 | 0.18 |
| KKSDVEAIFSKY        | 1123.5994 | 561.68 | 2 ##### | 2.91 | 0.23 |
| KKSDVEAIFSKY        | 1123.5994 | 561.68 | 2 ##### | 2.91 | 0.24 |



|                      |           |        |         |      |      |
|----------------------|-----------|--------|---------|------|------|
| KKSDVEAIFSKY         | 1123.5994 | 561.62 | 2 ##### | 2.93 | 0.36 |
| KKSDVEAIFSKY         | 1123.5994 | 561.57 | 2 ##### | 3.20 | 0.46 |
| KKSNFEEALAAHKY       | 1344.6907 | 672.18 | 2 ##### | 2.94 | 0.34 |
| KKVEEAEPPEEFVVEKV    | 1661.8269 | 830.64 | 2 ##### | 5.01 | 0.54 |
| KKVEEAEPPEEFVVEKV    | 1661.8269 | 830.65 | 2 ##### | 5.12 | 0.54 |
| KKVLTAFGESIKN        | 1192.6936 | 596.17 | 2 ##### | 2.64 | 0.36 |
| KKVLTAFGESIKN        | 1192.6936 | 596.10 | 2 ##### | 2.79 | 0.49 |
| KKVLTAFGESIKN        | 1192.6936 | 596.13 | 2 ##### | 2.95 | 0.44 |
| KKVLTAFGESIKN        | 1192.6936 | 596.12 | 2 ##### | 3.13 | 0.46 |
| KKVLTAFGESIKN        | 1192.6936 | 596.07 | 2 ##### | 3.63 | 0.55 |
| KLAALNPESNTSGLDIFAKF | 1860.9702 | 930.18 | 2 ##### | 4.05 | 0.62 |
| KLAALNPESNTSGLDIFAKF | 1860.9702 | 930.17 | 2 ##### | 4.08 | 0.64 |
| KLAALNPESNTSGLDIFAKF | 1860.9702 | 930.15 | 2 ##### | 4.64 | 0.67 |
| KLAALNPESNTSGLDIFAKF | 1860.9702 | 930.20 | 2 ##### | 4.84 | 0.56 |
| KLAALNPESNTSGLDIFAKF | 1860.9702 | 930.18 | 2 ##### | 5.08 | 0.61 |
| KLAALNPESNTSGLDIFAKF | 1860.9702 | 930.19 | 2 ##### | 5.10 | 0.59 |
| KLAATNALLNSLEFTKA    | 1605.8846 | 802.75 | 2 ##### | 3.88 | 0.38 |
| KLAATNALLNSLEFTKA    | 1605.8846 | 802.66 | 2 ##### | 4.88 | 0.56 |
| KLAATNALLNSLEFTKA    | 1605.8846 | 802.68 | 2 ##### | 4.93 | 0.52 |
| KLAATNALLNSLEFTKA    | 1605.8846 | 802.67 | 2 ##### | 5.12 | 0.54 |
| KLAATNALLNSLEFTKA    | 1605.8846 | 802.70 | 2 ##### | 5.20 | 0.48 |
| KLAAVDATVNQVLASRY    | 1527.8489 | 763.73 | 2 ##### | 3.31 | 0.40 |
| KLAAVDATVNQVLASRY    | 1527.8489 | 763.67 | 2 ##### | 4.49 | 0.50 |
| KLAAVDATVNQVLASRY    | 1527.8489 | 763.67 | 2 ##### | 4.50 | 0.52 |
| KLAQAAQSSVATITRL     | 1416.7805 | 708.16 | 2 ##### | 3.30 | 0.46 |
| KLAQAAQSSVATITRL     | 1416.7805 | 708.17 | 2 ##### | 3.38 | 0.45 |
| KLDELGVPLYAVVKE      | 1415.8145 | 707.73 | 2 ##### | 2.93 | 0.36 |
| KLDELGVPLYAVVKE      | 1415.8145 | 707.71 | 2 ##### | 3.52 | 0.39 |
| KLFIGGLNVQTSSEGLRG   | 1690.9122 | 845.20 | 2 ##### | 4.58 | 0.52 |
| KLFVTNDAATILRE       | 1333.7474 | 666.74 | 2 ##### | 2.52 | 0.27 |
| KLFVTNDAATILRE       | 1333.7474 | 666.69 | 2 ##### | 3.17 | 0.36 |
| KLFVTNDAATILRE       | 1333.7474 | 666.69 | 2 ##### | 3.46 | 0.37 |
| KLFVTNDAATILRE       | 1333.7474 | 666.69 | 2 ##### | 3.50 | 0.37 |
| KLGEYGFQNAILVRY      | 1479.7954 | 739.73 | 2 ##### | 2.52 | 0.33 |
| KLGEYGFQNAILVRY      | 1479.7954 | 739.74 | 2 ##### | 2.61 | 0.31 |
| KLGEYGFQNAILVRY      | 1479.7954 | 739.66 | 2 ##### | 2.66 | 0.48 |
| KLGEYGFQNAILVRY      | 1479.7954 | 739.65 | 2 ##### | 2.78 | 0.49 |
| KLGEYGFQNAILVRY      | 1479.7954 | 739.64 | 2 ##### | 2.86 | 0.52 |
| KLGEYGFQNAILVRY      | 1479.7954 | 739.75 | 2 ##### | 2.92 | 0.30 |
| KLGEYGFQNAILVRY      | 1479.7954 | 739.65 | 2 ##### | 3.16 | 0.50 |
| KLGEYGFQNAILVRY      | 1479.7954 | 739.62 | 2 ##### | 3.24 | 0.55 |
| KLGEYGFQNAILVRY      | 1479.7954 | 739.68 | 2 ##### | 3.27 | 0.43 |
| KLGEYGFQNAILVRY      | 1479.7954 | 739.62 | 2 ##### | 3.34 | 0.55 |
| KLGEYGFQNAILVRY      | 1479.7954 | 739.69 | 2 ##### | 3.35 | 0.41 |
| KLGEYGFQNAILVRY      | 1479.7954 | 739.65 | 2 ##### | 3.42 | 0.51 |
| KLGEYGFQNAILVRY      | 1479.7954 | 739.66 | 2 ##### | 3.49 | 0.47 |
| KLGEYGFQNAILVRY      | 1479.7954 | 739.62 | 2 ##### | 3.52 | 0.55 |
| KLGEYGFQNAILVRY      | 1479.7954 | 739.66 | 2 ##### | 3.63 | 0.47 |
| KLGEYGFQNAILVRY      | 1479.7954 | 739.65 | 2 ##### | 3.66 | 0.50 |
| KLGEYGFQNAILVRY      | 1479.7954 | 739.65 | 2 ##### | 3.68 | 0.50 |
| KLGEYGFQNAILVRY      | 1479.7954 | 739.62 | 2 ##### | 3.71 | 0.57 |
| KLGEYGFQNAILVRY      | 1479.7954 | 739.64 | 2 ##### | 3.78 | 0.53 |
| KLGEYGFQNAILVRY      | 1479.7954 | 739.69 | 2 ##### | 3.95 | 0.42 |
| KLGEYGFQNAILVRY      | 1479.7954 | 739.62 | 2 ##### | 4.15 | 0.55 |
| KLGGSAVISLEGKPL      | 1340.7784 | 670.23 | 2 ##### | 2.53 | 0.32 |
| KLGGSAVISLEGKPL      | 1340.7784 | 670.18 | 2 ##### | 2.79 | 0.42 |

|                       |           |        |         |      |      |
|-----------------------|-----------|--------|---------|------|------|
| KLGGSAVISLEGKPL       | 1340.7784 | 670.13 | 2 ##### | 3.31 | 0.51 |
| KLGNTISSLFGGGTSSDAKE  | 1711.8497 | 855.64 | 2 ##### | 3.04 | 0.57 |
| KLGVIEDHSNRT          | 1139.5803 | 569.68 | 2 ##### | 2.79 | 0.22 |
| KLGVIEDHSNRT          | 1139.5803 | 569.69 | 2 ##### | 2.81 | 0.20 |
| KLGVIEDHSNRT          | 1139.5803 | 569.66 | 2 ##### | 2.87 | 0.26 |
| KLGVIEDHSNRT          | 1139.5803 | 569.60 | 2 ##### | 2.89 | 0.37 |
| KLGVIEDHSNRT          | 1139.5803 | 569.61 | 2 ##### | 2.96 | 0.36 |
| KLIASVADDEAAVPNNKI    | 1626.8334 | 813.17 | 2 ##### | 2.65 | 0.49 |
| KLIASVADDEAAVPNNKI    | 1626.8334 | 813.30 | 2 ##### | 2.86 | 0.24 |
| KLIASVADDEAAVPNNKI    | 1626.8334 | 813.21 | 2 ##### | 2.98 | 0.42 |
| KLIASVADDEAAVPNNKI    | 1626.8334 | 813.17 | 2 ##### | 3.23 | 0.49 |
| KLIASVADDEAAVPNNKI    | 1626.8334 | 813.13 | 2 ##### | 3.30 | 0.57 |
| KLIASVADDEAAVPNNKI    | 1626.8334 | 813.22 | 2 ##### | 3.40 | 0.40 |
| KLIASVADDEAAVPNNKI    | 1626.8334 | 813.14 | 2 ##### | 3.44 | 0.55 |
| KLICCDILDVLDKH        | 1362.7007 | 681.19 | 2 ##### | 2.57 | 0.31 |
| KLICCDILDVLDKH        | 1362.7007 | 681.11 | 2 ##### | 2.63 | 0.47 |
| KLKDDEVAQLRK          | 1186.6426 | 593.16 | 2 ##### | 3.06 | 0.32 |
| KLKDDEVAQLRK          | 1186.6426 | 593.26 | 2 ##### | 3.11 | 0.13 |
| KLKDDEVAQLRK          | 1186.6426 | 593.21 | 2 ##### | 3.14 | 0.23 |
| KLKDDEVAQLRK          | 1186.6426 | 593.17 | 2 ##### | 3.84 | 0.31 |
| KLKSDTAAAVRQ          | 1102.6215 | 551.14 | 2 ##### | 3.09 | 0.34 |
| KLLATEQEDAAVAKS       | 1358.7162 | 679.10 | 2 ##### | 3.22 | 0.52 |
| KLLATEQEDAAVAKS       | 1358.7162 | 679.11 | 2 ##### | 3.25 | 0.51 |
| KLLDAVDTYIPVPTRD      | 1572.8632 | 786.29 | 2 ##### | 2.65 | 0.29 |
| KLLDAVDTYIPVPTRD      | 1572.8632 | 786.23 | 2 ##### | 3.34 | 0.41 |
| KLLEQYKEESKK          | 1266.6576 | 633.14 | 2 ##### | 2.86 | 0.38 |
| KLLEQYKEESKK          | 1266.6576 | 633.12 | 2 ##### | 2.91 | 0.42 |
| KLLEQYKEESKK          | 1266.6576 | 633.13 | 2 ##### | 2.94 | 0.40 |
| KLLEQYKEESKK          | 1266.6576 | 633.12 | 2 ##### | 3.13 | 0.42 |
| KLLGPDAAINLADPDGALAKR | 1834.9908 | 917.33 | 2 ##### | 3.12 | 0.33 |
| KLLGPDAAINLADPDGALAKR | 1834.9908 | 917.28 | 2 ##### | 3.97 | 0.44 |
| KLLGPDAAINLADPDGALAKR | 1834.9908 | 917.21 | 2 ##### | 4.09 | 0.57 |
| KLLLQVQHASKQ          | 1136.6786 | 568.21 | 2 ##### | 2.60 | 0.27 |
| KLLLQVQHASKQ          | 1136.6786 | 568.17 | 2 ##### | 2.61 | 0.33 |
| KLLLQVQHASKQ          | 1136.6786 | 568.20 | 2 ##### | 2.72 | 0.28 |
| KLLPEYPGVLSEVQEEKG    | 1829.9531 | 914.73 | 2 ##### | 3.19 | 0.50 |
| KLLPEYPGVLSEVQEEKG    | 1829.9531 | 914.69 | 2 ##### | 3.26 | 0.57 |
| KLLPEYPGVLSEVQEEKG    | 1829.9531 | 914.77 | 2 ##### | 3.29 | 0.41 |
| KLNVAPVSDIIEIKS       | 1410.8203 | 705.20 | 2 ##### | 2.57 | 0.42 |
| KLNVAPVSDIIEIKS       | 1410.8203 | 705.18 | 2 ##### | 2.62 | 0.45 |
| KLNVAPVSDIIEIKS       | 1410.8203 | 705.23 | 2 ##### | 2.92 | 0.36 |
| KLNVAPVSDIIEIKS       | 1410.8203 | 705.24 | 2 ##### | 3.03 | 0.35 |
| KLPIGDVATQYFADR       | 1565.7958 | 782.69 | 2 ##### | 2.56 | 0.42 |
| KLPIGDVATQYFADR       | 1565.7958 | 782.64 | 2 ##### | 2.77 | 0.51 |
| KLPIGDVATQYFADR       | 1565.7958 | 782.69 | 2 ##### | 2.93 | 0.41 |
| KLRDEEVHTGLGELLRS     | 1736.9290 | 578.80 | 3 ##### | 3.37 | 0.53 |
| KLRDEEVHTGLGELLRS     | 1736.9290 | 578.83 | 3 ##### | 3.60 | 0.43 |
| KLRDEEVHTGLGELLRS     | 1736.9290 | 868.25 | 2 ##### | 4.92 | 0.44 |
| KLRDEEVHTGLGELLRS     | 1736.9290 | 868.22 | 2 ##### | 5.12 | 0.49 |
| KLRDEEVHTGLGELLRS     | 1736.9290 | 868.25 | 2 ##### | 5.31 | 0.42 |
| KLSELHAYILRV          | 1214.6892 | 607.19 | 2 ##### | 2.62 | 0.30 |
| KLSELHAYILRV          | 1214.6892 | 607.13 | 2 ##### | 3.40 | 0.43 |
| KLSELHAYILRV          | 1214.6892 | 607.13 | 2 ##### | 3.55 | 0.43 |
| KLSELHAYILRV          | 1214.6892 | 607.18 | 2 ##### | 3.68 | 0.33 |
| KLSELHAYILRV          | 1214.6892 | 607.18 | 2 ##### | 4.00 | 0.33 |
| KLSGSNPYTTVTPQIINSKW  | 1920.0073 | 959.73 | 2 ##### | 3.75 | 0.54 |

|                         |           |         |         |      |      |
|-------------------------|-----------|---------|---------|------|------|
| KLSGSNPYTTVTPQIINSKW    | 1920.0073 | 959.72  | 2 ##### | 4.21 | 0.57 |
| KLSGSNPYTTVTPQIINSKW    | 1920.0073 | 959.70  | 2 ##### | 4.59 | 0.60 |
| KLSGSNPYTTVTPQIINSKW    | 1920.0073 | 959.78  | 2 ##### | 4.88 | 0.44 |
| KLSPPYSSPQEFAQDVGRM     | 1877.9028 | 938.71  | 2 ##### | 2.56 | 0.48 |
| KLSPPYSSPQEFAQDVGRM     | 1877.9028 | 938.76  | 2 ##### | 2.88 | 0.39 |
| KLSPPYSSPQEFAQDVGRM     | 1877.9028 | 938.67  | 2 ##### | 3.22 | 0.56 |
| KLSPPYSSPQEFAQDVGRM     | 1877.9028 | 938.69  | 2 ##### | 3.24 | 0.52 |
| KLSPPYSSPQEFAQDVGRM     | 1877.9028 | 938.66  | 2 ##### | 3.27 | 0.58 |
| KLSPPYSSPQEFAQDVGRM     | 1877.9028 | 938.67  | 2 ##### | 3.45 | 0.57 |
| KLSPPYSSPQEFAQDVGRM     | 1877.9028 | 938.64  | 2 ##### | 3.47 | 0.62 |
| KLSPPYSSPQEFAQDVGRM     | 1877.9028 | 938.67  | 2 ##### | 3.51 | 0.56 |
| KLSPPYSSPQEFAQDVGRM     | 1877.9028 | 938.66  | 2 ##### | 3.66 | 0.57 |
| KLSPPYSSPQEFAQDVGRM     | 1877.9028 | 938.68  | 2 ##### | 3.66 | 0.54 |
| KLSPPYSSPQEFAQDVGRM     | 1877.9028 | 938.66  | 2 ##### | 3.83 | 0.59 |
| KLTLDTIFVPNTGKK         | 1418.7889 | 709.20  | 2 ##### | 2.50 | 0.39 |
| KLTLDTIFVPNTGKK         | 1418.7889 | 709.16  | 2 ##### | 3.20 | 0.46 |
| KLTLDTIFVPNTGKK         | 1418.7889 | 709.12  | 2 ##### | 3.29 | 0.54 |
| KLTLDTIFVPNTGKK         | 1418.7889 | 709.17  | 2 ##### | 3.30 | 0.44 |
| KLTLDTIFVPNTGKK         | 1418.7889 | 709.12  | 2 ##### | 3.55 | 0.55 |
| KLTQDQDQVDVKY           | 1160.5793 | 580.17  | 2 ##### | 2.64 | 0.24 |
| KLTQDQDQVDVKY           | 1160.5793 | 580.15  | 2 ##### | 2.68 | 0.27 |
| KLTQDQDQVDVKY           | 1160.5793 | 580.15  | 2 ##### | 2.69 | 0.28 |
| KLTQDQDQVDVKY           | 1160.5793 | 580.16  | 2 ##### | 2.77 | 0.27 |
| KLTQDQDQVDVKY           | 1160.5793 | 580.15  | 2 ##### | 3.07 | 0.27 |
| KLTQDQDQVDVKY           | 1160.5793 | 580.13  | 2 ##### | 3.28 | 0.33 |
| KLTQDQDQVDVKY           | 1160.5793 | 580.13  | 2 ##### | 3.37 | 0.32 |
| KLTSAVSSLPELLEKK        | 1486.8363 | 743.19  | 2 ##### | 3.11 | 0.45 |
| KLTSAVSSLPELLEKK        | 1486.8363 | 743.18  | 2 ##### | 3.44 | 0.48 |
| KLVAGVATALSHKY          | 1166.6892 | 583.21  | 2 ##### | 2.87 | 0.26 |
| KLVAGVATALSHKY          | 1166.6892 | 583.22  | 2 ##### | 2.95 | 0.25 |
| KLVAGVATALSHKY          | 1166.6892 | 583.27  | 2 ##### | 2.96 | 0.14 |
| KLVAGVATALSHKY          | 1166.6892 | 583.20  | 2 ##### | 3.16 | 0.29 |
| KLVAGVATALSHKY          | 1166.6892 | 583.23  | 2 ##### | 3.16 | 0.23 |
| KLVAGVATALSHKY          | 1166.6892 | 583.24  | 2 ##### | 3.42 | 0.21 |
| KLVINGKPITIFQERD        | 1627.9530 | 542.50  | 3 ##### | 3.28 | 0.44 |
| KLVQDVANNTNEEAGDGTATVLR | 2560.2485 | 1279.78 | 2 ##### | 2.73 | 0.69 |
| KLVQDVANNTNEEAGDGTATVLR | 2560.2485 | 1279.78 | 2 ##### | 3.20 | 0.69 |
| KLVQDVANNTNEEAGDGTATVLR | 2560.2485 | 1279.77 | 2 ##### | 3.37 | 0.70 |
| KLVQDVANNTNEEAGDGTATVLR | 2560.2485 | 1279.75 | 2 ##### | 4.36 | 0.76 |
| KLVQDVANNTNEEAGDGTATVLR | 2560.2485 | 853.24  | 3 ##### | 4.54 | 0.53 |
| KLYDNLLEQNLIRV          | 1503.8165 | 751.73  | 2 ##### | 3.87 | 0.35 |
| KLYGSGGPPPTGEEDTSEKDEL  | 2177.9722 | 1088.66 | 2 ##### | 3.32 | 0.65 |
| KLYGSGGPPPTGEEDTSEKDEL  | 2177.9722 | 1088.74 | 2 ##### | 3.63 | 0.48 |
| KLYGSGGPPPTGEEDTSEKDEL  | 2177.9722 | 1088.73 | 2 ##### | 3.73 | 0.51 |
| KLYGSGGPPPTGEEDTSEKDEL  | 2177.9722 | 1088.68 | 2 ##### | 3.96 | 0.61 |
| KLYGSGGPPPTGEEDTSEKDEL  | 2177.9722 | 1088.69 | 2 ##### | 4.13 | 0.59 |
| KLYTLVLTDPDAPSRK        | 1560.8268 | 780.23  | 2 ##### | 2.69 | 0.37 |
| KLYTLVLTDPDAPSRK        | 1560.8268 | 780.16  | 2 ##### | 3.85 | 0.51 |
| KLYTLVLTDPDAPSRK        | 1560.8268 | 780.19  | 2 ##### | 3.90 | 0.45 |
| KLYTLVLTDPDAPSRK        | 1560.8268 | 780.24  | 2 ##### | 3.91 | 0.35 |
| KLYTLVLTDPDAPSRK        | 1560.8268 | 780.17  | 2 ##### | 4.40 | 0.49 |
| KMEIDDLSSNAEAIKAKG      | 1805.8950 | 902.83  | 2 ##### | 2.95 | 0.24 |
| KMSTTFIGNSTAIQELFKR     | 1887.9520 | 943.73  | 2 ##### | 3.14 | 0.50 |
| KMSTTFIGNSTAIQELFKR     | 1887.9520 | 943.74  | 2 ##### | 3.37 | 0.47 |
| KMSTTFIGNSTAIQELFKR     | 1887.9520 | 943.77  | 2 ##### | 3.75 | 0.41 |
| KMSTTFIGNSTAIQELFKR     | 1887.9520 | 943.73  | 2 ##### | 3.86 | 0.49 |

|                   |           |        |         |      |      |
|-------------------|-----------|--------|---------|------|------|
| KNAGVEGSLIVEKI    | 1215.6580 | 607.63 | 2 ##### | 2.57 | 0.40 |
| KNAGVEGSLIVEKI    | 1215.6580 | 607.67 | 2 ##### | 2.62 | 0.33 |
| KNAGVEGSLIVEKI    | 1215.6580 | 607.66 | 2 ##### | 2.78 | 0.34 |
| KNAGVEGSLIVEKI    | 1215.6580 | 607.66 | 2 ##### | 3.11 | 0.35 |
| KNAGVEGSLIVEKI    | 1215.6580 | 607.63 | 2 ##### | 3.36 | 0.40 |
| KNAGVEGSLIVEKI    | 1215.6580 | 607.62 | 2 ##### | 3.47 | 0.41 |
| KNEKSEEEQSSASVKK  | 1551.7133 | 775.65 | 2 ##### | 2.77 | 0.42 |
| KNEKSEEEQSSASVKK  | 1551.7133 | 775.60 | 2 ##### | 4.16 | 0.51 |
| KNEPQNAAGAPGRT    | 1181.5658 | 590.54 | 2 ##### | 2.58 | 0.48 |
| KNEPQNAAGAPGRT    | 1181.5658 | 590.54 | 2 ##### | 3.03 | 0.48 |
| KNIEDVIAQGVGKL    | 1242.6688 | 621.14 | 2 ##### | 2.66 | 0.38 |
| KNKDFAVDIIKS      | 1162.6466 | 581.18 | 2 ##### | 2.55 | 0.29 |
| KNLLHVTDTGVGMTR   | 1529.7785 | 764.81 | 2 ##### | 2.50 | 0.16 |
| KNLLHVTDTGVGMTR   | 1529.7785 | 764.66 | 2 ##### | 3.16 | 0.45 |
| KNLLHVTDTGVGMTR   | 1529.7785 | 764.67 | 2 ##### | 3.20 | 0.45 |
| KNLLHVTDTGVGMTR   | 1529.7785 | 764.70 | 2 ##### | 3.21 | 0.38 |
| KNLLHVTDTGVGMTR   | 1529.7785 | 764.69 | 2 ##### | 3.46 | 0.39 |
| KNLLHVTDTGVGMTR   | 1529.7785 | 764.64 | 2 ##### | 3.62 | 0.51 |
| KNLLHVTDTGVGMTR   | 1529.7785 | 764.66 | 2 ##### | 3.82 | 0.46 |
| KNLQYYDISAKS      | 1214.6052 | 607.12 | 2 ##### | 2.51 | 0.37 |
| KNLQYYDISAKS      | 1214.6052 | 607.19 | 2 ##### | 2.86 | 0.22 |
| KNLSFNITEDELKE    | 1422.7111 | 711.22 | 2 ##### | 2.76 | 0.28 |
| KNLSFNITEDELKE    | 1422.7111 | 711.13 | 2 ##### | 3.01 | 0.44 |
| KNNASTDYDLSDKS    | 1342.5757 | 671.07 | 2 ##### | 3.21 | 0.43 |
| KNNASTDYDLSDKS    | 1342.5757 | 671.11 | 2 ##### | 3.29 | 0.35 |
| KNNASTDYDLSDKS    | 1342.5757 | 671.04 | 2 ##### | 3.55 | 0.49 |
| KNQLTSNPENTVFDAKR | 1677.8079 | 838.80 | 2 ##### | 3.21 | 0.22 |
| KNQLTSNPENTVFDAKR | 1677.8079 | 838.66 | 2 ##### | 4.22 | 0.48 |
| KNQLTSNPENTVFDAKR | 1677.8079 | 838.64 | 2 ##### | 4.41 | 0.53 |
| KNQLTSNPENTVFDAKR | 1677.8079 | 838.63 | 2 ##### | 4.58 | 0.54 |
| KNQLTSNPENTVFDAKR | 1677.8079 | 838.62 | 2 ##### | 4.73 | 0.57 |
| KNSDEADLVPAKE     | 1158.5637 | 579.13 | 2 ##### | 2.72 | 0.31 |
| KNSDEADLVPAKE     | 1158.5637 | 579.04 | 2 ##### | 3.28 | 0.49 |
| KNSDEADLVPAKE     | 1158.5637 | 579.04 | 2 ##### | 3.39 | 0.49 |
| KNSVVEASEAAYKE    | 1267.6165 | 633.57 | 2 ##### | 3.07 | 0.47 |
| KNSVVEASEAAYKE    | 1267.6165 | 633.57 | 2 ##### | 3.42 | 0.48 |
| KNSVVEASEAAYKE    | 1267.6165 | 633.56 | 2 ##### | 3.48 | 0.50 |
| KNSVVEASEAAYKE    | 1267.6165 | 633.59 | 2 ##### | 3.60 | 0.43 |
| KNSVVEASEAAYKE    | 1267.6165 | 633.57 | 2 ##### | 3.76 | 0.47 |
| KNVGLDIEAEVPAVKD  | 1453.7897 | 726.67 | 2 ##### | 2.69 | 0.45 |
| KNVGLDIEAEVPAVKD  | 1453.7897 | 726.59 | 2 ##### | 3.49 | 0.60 |
| KNVTELNEPLSNEERN  | 1643.7871 | 821.65 | 2 ##### | 2.74 | 0.50 |
| KNVTELNEPLSNEERN  | 1643.7871 | 821.62 | 2 ##### | 3.37 | 0.54 |
| KNVTELNEPLSNEERN  | 1643.7871 | 821.67 | 2 ##### | 3.45 | 0.45 |
| KNVTELNEPLSNEERN  | 1643.7871 | 821.61 | 2 ##### | 3.70 | 0.56 |
| KNVTELNEPLSNEERN  | 1643.7871 | 821.59 | 2 ##### | 3.82 | 0.60 |
| KNVTELNEPLSNEERN  | 1643.7871 | 821.61 | 2 ##### | 4.10 | 0.56 |
| KNVTELNEPLSNEERN  | 1643.7871 | 821.63 | 2 ##### | 4.26 | 0.54 |
| KNVTELNEPLSNEERN  | 1643.7871 | 821.61 | 2 ##### | 4.61 | 0.56 |
| KNVTELNEPLSNEERN  | 1643.7871 | 821.60 | 2 ##### | 4.68 | 0.59 |
| KNVTELNEPLSNEERN  | 1643.7871 | 821.63 | 2 ##### | 4.80 | 0.52 |
| KNYTDDAIETDDLTIKL | 1726.8018 | 863.18 | 2 ##### | 3.65 | 0.44 |
| KNYTDDAIETDDLTIKL | 1726.8018 | 863.13 | 2 ##### | 4.10 | 0.54 |
| KQMQLVHPAARM      | 1150.6150 | 575.08 | 2 ##### | 2.53 | 0.46 |
| KRFDVSGYPTLKI     | 1282.6790 | 641.16 | 2 ##### | 2.87 | 0.36 |
| KRFDVSGYPTLKI     | 1282.6790 | 641.23 | 2 ##### | 2.88 | 0.23 |

|                      |           |        |         |      |      |
|----------------------|-----------|--------|---------|------|------|
| KRISGLIYEETRG        | 1336.7219 | 668.23 | 2 ##### | 2.51 | 0.27 |
| KRISGLIYEETRG        | 1336.7219 | 668.24 | 2 ##### | 2.52 | 0.25 |
| KRISGLIYEETRG        | 1336.7219 | 668.22 | 2 ##### | 2.58 | 0.28 |
| KRISGLIYEETRG        | 1336.7219 | 668.19 | 2 ##### | 2.66 | 0.33 |
| KRISGLIYEETRG        | 1336.7219 | 668.21 | 2 ##### | 2.78 | 0.31 |
| KRLHGLDEEAEQKL       | 1424.7129 | 712.16 | 2 ##### | 2.78 | 0.39 |
| KRLHGLDEEAEQKL       | 1424.7129 | 712.20 | 2 ##### | 2.96 | 0.32 |
| KRLHGLDEEAEQKL       | 1424.7129 | 712.19 | 2 ##### | 2.98 | 0.34 |
| KSAAQAAAQTNNAAGKQ    | 1460.7089 | 730.22 | 2 ##### | 2.55 | 0.26 |
| KSAAQAAAQTNNAAGKQ    | 1460.7089 | 730.08 | 2 ##### | 3.83 | 0.55 |
| KSAAQAAAQTNNAAGKQ    | 1460.7089 | 730.07 | 2 ##### | 3.92 | 0.57 |
| KSAAQAAAQTNNAAGKQ    | 1460.7089 | 730.10 | 2 ##### | 4.11 | 0.52 |
| KSAAQAAAQTNNAAGKQ    | 1460.7089 | 730.04 | 2 ##### | 4.53 | 0.62 |
| KSAAQAAAQTNNAAGKQ    | 1460.7089 | 730.04 | 2 ##### | 4.53 | 0.62 |
| KSAPDFTATAVVDGAFKE   | 1596.7904 | 798.09 | 2 ##### | 3.61 | 0.61 |
| KSAPDFTATAVVDGAFKE   | 1596.7904 | 798.13 | 2 ##### | 3.77 | 0.54 |
| KSAPDFTATAVVDGAFKE   | 1596.7904 | 798.12 | 2 ##### | 4.09 | 0.56 |
| KSAPDFTATAVVDGAFKE   | 1596.7904 | 798.11 | 2 ##### | 4.49 | 0.58 |
| KSAPDFTATAVVDGAFKE   | 1596.7904 | 798.08 | 2 ##### | 4.49 | 0.63 |
| KSAPDFTATAVVDGAFKE   | 1596.7904 | 798.11 | 2 ##### | 4.81 | 0.57 |
| KSAPDFTATAVVDGAFKE   | 1596.7904 | 798.08 | 2 ##### | 5.32 | 0.63 |
| KSEADAENLLEEKQ       | 1362.6383 | 681.18 | 2 ##### | 3.23 | 0.28 |
| KSEADAENLLEEKQ       | 1362.6383 | 681.16 | 2 ##### | 3.24 | 0.32 |
| KSEADAENLLEEKQ       | 1362.6383 | 681.15 | 2 ##### | 3.27 | 0.34 |
| KSEADAENLLEEKQ       | 1362.6383 | 681.15 | 2 ##### | 3.29 | 0.34 |
| KSEADAENLLEEKQ       | 1362.6383 | 681.17 | 2 ##### | 3.44 | 0.29 |
| KSEEEQSSASVKK        | 1180.5328 | 590.08 | 2 ##### | 2.52 | 0.37 |
| KSEEEQSSASVKK        | 1180.5328 | 590.02 | 2 ##### | 2.84 | 0.49 |
| KSEEEQSSASVKK        | 1180.5328 | 590.02 | 2 ##### | 3.45 | 0.49 |
| KSESPKEPEQLRK        | 1299.6539 | 649.67 | 2 ##### | 2.75 | 0.32 |
| KSESPKEPEQLRK        | 1299.6539 | 649.65 | 2 ##### | 2.89 | 0.36 |
| KSESPKEPEQLRK        | 1299.6539 | 649.65 | 2 ##### | 3.02 | 0.35 |
| KSGEIEPVSVKV         | 1044.5571 | 522.12 | 2 ##### | 2.58 | 0.32 |
| KSGEIEPVSVKV         | 1044.5571 | 522.07 | 2 ##### | 2.71 | 0.41 |
| KSGEIEPVSVKV         | 1044.5571 | 522.09 | 2 ##### | 2.74 | 0.37 |
| KSGEIEPVSVKV         | 1044.5571 | 522.08 | 2 ##### | 2.75 | 0.40 |
| KSGEIEPVSVKV         | 1044.5571 | 522.08 | 2 ##### | 2.95 | 0.39 |
| KSIDNLSSALTKL        | 1148.6157 | 574.14 | 2 ##### | 2.51 | 0.33 |
| KSIDNLSSALTKL        | 1148.6157 | 574.08 | 2 ##### | 2.61 | 0.46 |
| KSIDNLSSALTKL        | 1148.6157 | 574.14 | 2 ##### | 2.67 | 0.33 |
| KSIDNLSSALTKL        | 1148.6157 | 574.06 | 2 ##### | 2.80 | 0.49 |
| KSIDNLSSALTKL        | 1148.6157 | 574.10 | 2 ##### | 3.01 | 0.42 |
| KSIDNLSSALTKL        | 1148.6157 | 574.12 | 2 ##### | 3.05 | 0.38 |
| KSIDNLSSALTKL        | 1148.6157 | 574.02 | 2 ##### | 3.16 | 0.57 |
| KSIDNLSSALTKL        | 1148.6157 | 574.07 | 2 ##### | 3.17 | 0.48 |
| KSIDNLSSALTKL        | 1148.6157 | 574.10 | 2 ##### | 3.31 | 0.41 |
| KSILFVPTSAPRG        | 1187.6782 | 593.69 | 2 ##### | 2.55 | 0.29 |
| KSILFVPTSAPRG        | 1187.6782 | 593.70 | 2 ##### | 2.88 | 0.28 |
| KSILFVPTSAPRG        | 1187.6782 | 593.72 | 2 ##### | 3.13 | 0.24 |
| KSILFVPTSAPRG        | 1187.6782 | 593.69 | 2 ##### | 3.21 | 0.30 |
| KSLAGSSGPGDHSSELIVRI | 2195.0686 | 731.48 | 3 ##### | 3.91 | 0.64 |
| KSNLAYDIVQLPTGLTGIV  | 1903.0535 | 951.23 | 2 ##### | 4.64 | 0.60 |
| KSPASDTYIVFGEAKI     | 1484.7268 | 742.05 | 2 ##### | 3.40 | 0.64 |
| KSPASDTYIVFGEAKI     | 1484.7268 | 742.05 | 2 ##### | 4.19 | 0.63 |
| KSPASDTYIVFGEAKI     | 1484.7268 | 742.03 | 2 ##### | 4.24 | 0.67 |
| KSPASDTYIVFGEAKI     | 1484.7268 | 742.04 | 2 ##### | 4.50 | 0.65 |

|                      |           |        |         |      |      |
|----------------------|-----------|--------|---------|------|------|
| KSPASDTYIVFGEAKI     | 1484.7268 | 742.06 | 2 ##### | 4.63 | 0.61 |
| KSPASDTYIVFGEAKI     | 1484.7268 | 742.04 | 2 ##### | 4.70 | 0.64 |
| KSPFVVNVAPPLDLSKV    | 1582.8839 | 791.19 | 2 ##### | 2.78 | 0.50 |
| KSQIFSTASDNQPTVTIKV  | 1836.9338 | 918.25 | 2 ##### | 3.20 | 0.43 |
| KSQIFSTASDNQPTVTIKV  | 1836.9338 | 918.38 | 2 ##### | 3.34 | 0.18 |
| KSQIFSTASDNQPTVTIKV  | 1836.9338 | 918.17 | 2 ##### | 3.96 | 0.60 |
| KSQIFSTASDNQPTVTIKV  | 1836.9338 | 918.17 | 2 ##### | 4.18 | 0.59 |
| KSQIFSTASDNQPTVTIKV  | 1836.9338 | 918.24 | 2 ##### | 4.37 | 0.46 |
| KSQIFSTASDNQPTVTIKV  | 1836.9338 | 918.15 | 2 ##### | 4.40 | 0.64 |
| KSQIFSTASDNQPTVTIKV  | 1836.9338 | 918.18 | 2 ##### | 4.57 | 0.57 |
| KSQIFSTASDNQPTVTIKV  | 1836.9338 | 918.18 | 2 ##### | 4.67 | 0.58 |
| KSQIFSTASDNQPTVTIKV  | 1836.9338 | 918.15 | 2 ##### | 4.80 | 0.63 |
| KSQIHDIVLVGGSTRI     | 1481.8071 | 740.61 | 2 ##### | 4.28 | 0.58 |
| KSQIHDIVLVGGSTRI     | 1481.8071 | 740.61 | 2 ##### | 4.30 | 0.58 |
| KSQIHDIVLVGGSTRI     | 1481.8071 | 740.62 | 2 ##### | 4.36 | 0.58 |
| KSQIHDIVLVGGSTRI     | 1481.8071 | 740.60 | 2 ##### | 4.37 | 0.62 |
| KSQIHDIVLVGGSTRI     | 1481.8071 | 740.63 | 2 ##### | 4.38 | 0.56 |
| KSQIHDIVLVGGSTRI     | 1481.8071 | 740.60 | 2 ##### | 4.48 | 0.61 |
| KSQIHDIVLVGGSTRI     | 1481.8071 | 740.63 | 2 ##### | 4.53 | 0.55 |
| KSQIHDIVLVGGSTRI     | 1481.8071 | 740.62 | 2 ##### | 4.63 | 0.57 |
| KSSGPTSLFAVTVAPPGARQ | 1714.9122 | 857.16 | 2 ##### | 2.71 | 0.59 |
| KSSGPTSLFAVTVAPPGARQ | 1714.9122 | 857.22 | 2 ##### | 3.05 | 0.48 |
| KSSGPTSLFAVTVAPPGARQ | 1714.9122 | 857.18 | 2 ##### | 3.09 | 0.54 |
| KSSGPTSLFAVTVAPPGARQ | 1714.9122 | 857.20 | 2 ##### | 3.09 | 0.51 |
| KSSGPTSLFAVTVAPPGARQ | 1714.9122 | 857.16 | 2 ##### | 3.25 | 0.59 |
| KSSGPTSLFAVTVAPPGARQ | 1714.9122 | 857.16 | 2 ##### | 3.51 | 0.59 |
| KSSSNTVESTSLYNKV     | 1516.7125 | 758.18 | 2 ##### | 2.75 | 0.35 |
| KSSSNTVESTSLYNKV     | 1516.7125 | 758.14 | 2 ##### | 3.51 | 0.44 |
| KSTAGDTHLGGEDFDNRM   | 1691.7256 | 845.58 | 2 ##### | 3.74 | 0.56 |
| KSTAGDTHLGGEDFDNRM   | 1691.7256 | 845.56 | 2 ##### | 3.80 | 0.60 |
| KSTAGDTHLGGEDFDNRM   | 1691.7256 | 845.57 | 2 ##### | 4.05 | 0.59 |
| KSTAGDTHLGGEDFDNRM   | 1691.7256 | 845.54 | 2 ##### | 4.28 | 0.65 |
| KSTESLQANVQRL        | 1232.6229 | 616.16 | 2 ##### | 3.20 | 0.31 |
| KSTESLQANVQRL        | 1232.6229 | 616.14 | 2 ##### | 3.25 | 0.34 |
| KSTESLQANVQRL        | 1232.6229 | 616.16 | 2 ##### | 3.28 | 0.30 |
| KSTESLQANVQRL        | 1232.6229 | 616.13 | 2 ##### | 3.64 | 0.37 |
| KSTFVLDEFKRK         | 1241.6525 | 620.55 | 2 ##### | 2.57 | 0.55 |
| KSTFVLDEFKRK         | 1241.6525 | 620.56 | 2 ##### | 2.61 | 0.53 |
| KSTFVLDEFKRK         | 1241.6525 | 620.55 | 2 ##### | 2.69 | 0.56 |
| KSTFVLDEFKRK         | 1241.6525 | 620.56 | 2 ##### | 2.84 | 0.53 |
| KSTFVLDEFKRK         | 1241.6525 | 620.56 | 2 ##### | 2.85 | 0.53 |
| KSTFVLDEFKRK         | 1241.6525 | 620.56 | 2 ##### | 2.97 | 0.53 |
| KSVTEQGAELSNEERN     | 1548.7136 | 774.24 | 2 ##### | 2.68 | 0.23 |
| KSVTEQGAELSNEERN     | 1548.7136 | 774.04 | 2 ##### | 4.01 | 0.62 |
| KSVTEQGAELSNEERN     | 1548.7136 | 774.17 | 2 ##### | 4.02 | 0.38 |
| KSVTEQGAELSNEERN     | 1548.7136 | 774.08 | 2 ##### | 4.21 | 0.55 |
| KSVTEQGAELSNEERN     | 1548.7136 | 774.05 | 2 ##### | 4.34 | 0.61 |
| KSVTEQGAELSNEERN     | 1548.7136 | 774.05 | 2 ##### | 4.39 | 0.61 |
| KSVTEQGAELSNEERN     | 1548.7136 | 774.08 | 2 ##### | 4.46 | 0.55 |
| KSVTEQGAELSNEERN     | 1548.7136 | 774.12 | 2 ##### | 4.48 | 0.46 |
| KSVTEQGAELSNEERN     | 1548.7136 | 774.14 | 2 ##### | 4.52 | 0.44 |
| KSVTEQGAELSNEERN     | 1548.7136 | 774.14 | 2 ##### | 4.55 | 0.43 |
| KSVTEQGAELSNEERN     | 1548.7136 | 774.15 | 2 ##### | 4.77 | 0.42 |
| KSVTEQGAELSNEERN     | 1548.7136 | 774.12 | 2 ##### | 5.03 | 0.47 |
| KSVTEQGAELSNEERN     | 1548.7136 | 774.06 | 2 ##### | 5.09 | 0.59 |
| KSVTEQGAELSNEERN     | 1548.7136 | 774.12 | 2 ##### | 5.33 | 0.47 |

|                    |           |        |         |      |      |
|--------------------|-----------|--------|---------|------|------|
| KSYELPDGQVITIGNERF | 1790.8920 | 895.32 | 2 ##### | 2.94 | 0.24 |
| KSYELPDGQVITIGNERF | 1790.8920 | 895.26 | 2 ##### | 3.13 | 0.37 |
| KSYELPDGQVITIGNERF | 1790.8920 | 895.19 | 2 ##### | 3.43 | 0.51 |
| KSYELPDGQVITIGNERF | 1790.8920 | 895.30 | 2 ##### | 3.54 | 0.29 |
| KSYELPDGQVITIGNERF | 1790.8920 | 895.24 | 2 ##### | 3.60 | 0.42 |
| KSYELPDGQVITIGNERF | 1790.8920 | 895.29 | 2 ##### | 3.76 | 0.32 |
| KSYELPDGQVITIGNERF | 1790.8920 | 895.17 | 2 ##### | 3.77 | 0.55 |
| KSYELPDGQVITIGNERF | 1790.8920 | 895.22 | 2 ##### | 3.78 | 0.44 |
| KSYELPDGQVITIGNERF | 1790.8920 | 895.26 | 2 ##### | 3.85 | 0.38 |
| KSYELPDGQVITIGNERF | 1790.8920 | 895.23 | 2 ##### | 4.23 | 0.44 |
| KSYELPDGQVITIGNERF | 1790.8920 | 895.23 | 2 ##### | 4.31 | 0.44 |
| KSYELPDGQVITIGNERF | 1790.8920 | 895.19 | 2 ##### | 4.35 | 0.51 |
| KSYELPDGQVITIGNERF | 1790.8920 | 895.19 | 2 ##### | 4.45 | 0.52 |
| KSYELPDGQVITIGNERF | 1790.8920 | 895.15 | 2 ##### | 4.46 | 0.58 |
| KSYELPDGQVITIGNERF | 1790.8920 | 895.17 | 2 ##### | 4.49 | 0.55 |
| KSYELPDGQVITIGNERF | 1790.8920 | 895.14 | 2 ##### | 4.50 | 0.62 |
| KSYELPDGQVITIGNERF | 1790.8920 | 895.15 | 2 ##### | 4.54 | 0.59 |
| KSYELPDGQVITIGNERF | 1790.8920 | 895.19 | 2 ##### | 4.57 | 0.51 |
| KSYELPDGQVITIGNERF | 1790.8920 | 895.17 | 2 ##### | 4.58 | 0.55 |
| KSYELPDGQVITIGNERF | 1790.8920 | 895.20 | 2 ##### | 4.58 | 0.49 |
| KSYELPDGQVITIGNERF | 1790.8920 | 895.20 | 2 ##### | 4.73 | 0.49 |
| KSYELPDGQVITIGNERF | 1790.8920 | 895.17 | 2 ##### | 4.74 | 0.55 |
| KSYELPDGQVITIGNERF | 1790.8920 | 895.16 | 2 ##### | 4.75 | 0.57 |
| KSYELPDGQVITIGNERF | 1790.8920 | 895.15 | 2 ##### | 4.78 | 0.58 |
| KSYELPDGQVITIGNERF | 1790.8920 | 895.16 | 2 ##### | 4.79 | 0.56 |
| KSYELPDGQVITIGNERF | 1790.8920 | 895.15 | 2 ##### | 4.90 | 0.60 |
| KSYELPDGQVITIGNERF | 1790.8920 | 895.16 | 2 ##### | 4.97 | 0.57 |
| KTAPYVVTGSVDQTVKV  | 1564.8217 | 782.21 | 2 ##### | 3.60 | 0.41 |
| KTAPYVVTGSVDQTVKV  | 1564.8217 | 782.21 | 2 ##### | 3.68 | 0.41 |
| KTAPYVVTGSVDQTVKV  | 1564.8217 | 782.17 | 2 ##### | 4.26 | 0.48 |
| KTASNVEEAFINTAKE   | 1494.7434 | 747.12 | 2 ##### | 3.26 | 0.50 |
| KTASNVEEAFINTAKE   | 1494.7434 | 747.07 | 2 ##### | 4.37 | 0.60 |
| KTASNVEEAFINTAKE   | 1494.7434 | 747.08 | 2 ##### | 4.58 | 0.58 |
| KTAVVVGTVTDDVRI    | 1331.7166 | 665.76 | 2 ##### | 2.81 | 0.21 |
| KTAVVVGTVTDDVRI    | 1331.7166 | 665.67 | 2 ##### | 2.88 | 0.38 |
| KTAVVVGTVTDDVRI    | 1331.7166 | 665.78 | 2 ##### | 2.96 | 0.15 |
| KTAVVVGTVTDDVRI    | 1331.7166 | 665.78 | 2 ##### | 3.36 | 0.16 |
| KTAVVVGTVTDDVRI    | 1331.7166 | 665.77 | 2 ##### | 3.37 | 0.18 |
| KTAVVVGTVTDDVRI    | 1331.7166 | 665.79 | 2 ##### | 3.49 | 0.13 |
| KTAVVVGTVTDDVRI    | 1331.7166 | 665.65 | 2 ##### | 3.85 | 0.42 |
| KTFTTQETITNAETAKE  | 1655.8123 | 827.78 | 2 ##### | 2.51 | 0.26 |
| KTFVSITPAEVLVGKD   | 1616.9258 | 808.35 | 2 ##### | 2.60 | 0.22 |
| KTFVSITPAEVLVGKD   | 1616.9258 | 808.25 | 2 ##### | 3.03 | 0.43 |
| KTFVSITPAEVLVGKD   | 1616.9258 | 808.22 | 2 ##### | 3.13 | 0.49 |
| KTFVSITPAEVLVGKD   | 1616.9258 | 808.21 | 2 ##### | 3.18 | 0.51 |
| KTFVSITPAEVLVGKD   | 1616.9258 | 808.21 | 2 ##### | 3.42 | 0.50 |
| KTFVSITPAEVLVGKD   | 1616.9258 | 808.16 | 2 ##### | 3.64 | 0.60 |
| KTFVSITPAEVLVGKD   | 1616.9258 | 808.18 | 2 ##### | 3.78 | 0.56 |
| KTFVSITPAEVLVGKD   | 1616.9258 | 808.17 | 2 ##### | 4.36 | 0.58 |
| KTFVSITPAEVLVGKD   | 1616.9258 | 808.16 | 2 ##### | 4.39 | 0.60 |
| KTGAEGAVLDEAKN     | 1160.5793 | 580.08 | 2 ##### | 2.83 | 0.42 |
| KTGAEGAVLDEAKN     | 1160.5793 | 580.07 | 2 ##### | 3.22 | 0.44 |
| KTGQEVVVFVAEPDNKN  | 1532.7592 | 766.15 | 2 ##### | 3.01 | 0.46 |
| KTGQEVVVFVAEPDNKN  | 1532.7592 | 766.19 | 2 ##### | 3.15 | 0.37 |
| KTGQEVVVFVAEPDNKN  | 1532.7592 | 766.14 | 2 ##### | 3.69 | 0.48 |
| KTGQEVVVFVAEPDNKN  | 1532.7592 | 766.17 | 2 ##### | 3.79 | 0.42 |

|                        |           |         |         |      |      |
|------------------------|-----------|---------|---------|------|------|
| KTGQEVVFAEPDNKN        | 1532.7592 | 766.13  | 2 ##### | 3.98 | 0.50 |
| KTIEAEEAHGTVTRH        | 1355.6914 | 677.68  | 2 ##### | 2.68 | 0.33 |
| KTIEAEEAHGTVTRH        | 1355.6914 | 677.59  | 2 ##### | 2.95 | 0.51 |
| KTIEAEEAHGTVTRH        | 1355.6914 | 677.58  | 2 ##### | 3.32 | 0.53 |
| KTIEAEEAHGTVTRH        | 1355.6914 | 677.57  | 2 ##### | 3.67 | 0.55 |
| KTIEAEEAHGTVTRH        | 1355.6914 | 677.57  | 2 ##### | 3.70 | 0.54 |
| KTIGGGDDSFNTFFSETGAGKH | 2007.8931 | 1003.85 | 2 ##### | 2.81 | 0.18 |
| KTIGGGDDSFNTFFSETGAGKH | 2007.8931 | 1003.64 | 2 ##### | 3.12 | 0.61 |
| KTIGGGDDSFNTFFSETGAGKH | 2007.8931 | 1003.64 | 2 ##### | 3.62 | 0.62 |
| KTIGGGDDSFNTFFSETGAGKH | 2007.8931 | 1003.64 | 2 ##### | 3.68 | 0.61 |
| KTIGGGDDSFNTFFSETGAGKH | 2007.8931 | 1003.71 | 2 ##### | 4.06 | 0.47 |
| KTIGGGDDSFNTFFSETGAGKH | 2007.8931 | 1003.61 | 2 ##### | 4.15 | 0.68 |
| KTIGGGDDSFNTFFSETGAGKH | 2007.8931 | 1003.62 | 2 ##### | 4.30 | 0.65 |
| KTIGGGDDSFNTFFSETGAGKH | 2007.8931 | 1003.61 | 2 ##### | 4.45 | 0.66 |
| KTIGGGDDSFNTFFSETGAGKH | 2007.8931 | 1003.65 | 2 ##### | 4.73 | 0.60 |
| KTIGGGDDSFNTFFSETGAGKH | 2007.8931 | 1003.63 | 2 ##### | 4.75 | 0.63 |
| KTIGGGDDSFNTFFSETGAGKH | 2007.8931 | 1003.61 | 2 ##### | 4.76 | 0.68 |
| KTIGGGDDSFNTFFSETGAGKH | 2007.8931 | 1003.61 | 2 ##### | 4.84 | 0.67 |
| KTIGGGDDSFNTFFSETGAGKH | 2007.8931 | 1003.64 | 2 ##### | 4.88 | 0.61 |
| KTIGGGDDSFNTFFSETGAGKH | 2007.8931 | 1003.61 | 2 ##### | 5.24 | 0.68 |
| KTIGGGDDSFNTFFSETGAGKH | 2007.8931 | 1003.62 | 2 ##### | 5.36 | 0.66 |
| KTIGGGDDSFNTFFSETGAGKH | 2007.8931 | 1003.62 | 2 ##### | 5.55 | 0.66 |
| KTIGGGDDSFNTFFSETGAGKH | 2007.8931 | 1003.63 | 2 ##### | 5.70 | 0.64 |
| KTIGGGDDSFNTFFSETGAGKH | 2007.8931 | 1003.63 | 2 ##### | 5.71 | 0.64 |
| KTIGGGDDSFNTFFSETGAGKH | 2007.8931 | 1003.58 | 2 ##### | 5.72 | 0.73 |
| KTIGGGDDSFNTFFSETGAGKH | 2007.8931 | 1003.59 | 2 ##### | 5.85 | 0.71 |
| KTIGGGDDSFNTFFSETGAGKH | 2007.8931 | 1003.60 | 2 ##### | 5.89 | 0.70 |
| KTIGGGDDSFNTFFSETGAGKH | 2007.8931 | 1003.61 | 2 ##### | 6.04 | 0.68 |
| KTIGVSNFNPLQIERI       | 1587.8489 | 793.75  | 2 ##### | 3.47 | 0.36 |
| KTIGVSNFNPLQIERI       | 1587.8489 | 793.68  | 2 ##### | 3.58 | 0.50 |
| KTIGVSNFNPLQIERI       | 1587.8489 | 793.69  | 2 ##### | 3.87 | 0.47 |
| KTILEEEITPTIQKL        | 1514.8312 | 757.32  | 2 ##### | 2.55 | 0.20 |
| KTILEEEITPTIQKL        | 1514.8312 | 757.30  | 2 ##### | 2.86 | 0.24 |
| KTILEEEITPTIQKL        | 1514.8312 | 757.36  | 2 ##### | 3.10 | 0.11 |
| KTIQVDNTDAEGR          | 1318.6233 | 659.16  | 2 ##### | 3.19 | 0.30 |
| KTKEQILEEFSKV          | 1351.7103 | 675.68  | 2 ##### | 2.81 | 0.36 |
| KTLASLSPETSLFIIASKT    | 1777.9946 | 888.79  | 2 ##### | 2.97 | 0.41 |
| KTLASLSPETSLFIIASKT    | 1777.9946 | 888.74  | 2 ##### | 3.75 | 0.51 |
| KTLEEEDEELFKM          | 1381.6370 | 690.62  | 2 ##### | 2.58 | 0.40 |
| KTLEEEDEELFKM          | 1381.6370 | 690.63  | 2 ##### | 2.70 | 0.37 |
| KTLEEEDEELFKM          | 1381.6370 | 690.71  | 2 ##### | 2.89 | 0.21 |
| KTLEEEDEELFKM          | 1381.6370 | 690.60  | 2 ##### | 3.10 | 0.44 |
| KTLEEEDEELFKM          | 1381.6370 | 690.59  | 2 ##### | 3.34 | 0.46 |
| KTLEEEDEELFKM          | 1381.6370 | 690.55  | 2 ##### | 3.37 | 0.53 |
| KTLNDELEIIIEGMKF       | 1520.7557 | 760.13  | 2 ##### | 2.58 | 0.49 |
| KTLNDELEIIIEGMKF       | 1520.7557 | 760.17  | 2 ##### | 2.83 | 0.41 |
| KTLNDELEIIIEGMKF       | 1520.7557 | 760.15  | 2 ##### | 3.05 | 0.45 |
| KTLNDELEIIIEGMKF       | 1520.7557 | 760.13  | 2 ##### | 3.49 | 0.49 |
| KTLNDELEIIIEGMKF       | 1520.7557 | 760.15  | 2 ##### | 3.75 | 0.45 |
| KTLNDELEIIIEGMKF       | 1520.7557 | 760.14  | 2 ##### | 4.19 | 0.47 |
| KTLTTAAVSTAQPILSKL     | 1601.9109 | 800.88  | 2 ##### | 3.19 | 0.16 |
| KTLTTAAVSTAQPILSKL     | 1601.9109 | 800.82  | 2 ##### | 3.37 | 0.27 |
| KTLVLSNLSYSATKE        | 1396.7682 | 698.10  | 2 ##### | 3.05 | 0.57 |
| KTLVLSNLSYSATKE        | 1396.7682 | 698.11  | 2 ##### | 3.58 | 0.55 |
| KTLVLSNLSYSATKE        | 1396.7682 | 698.09  | 2 ##### | 3.67 | 0.59 |
| KTLVLSNLSYSATKE        | 1396.7682 | 698.10  | 2 ##### | 3.88 | 0.56 |



|                        |           |         |         |      |      |
|------------------------|-----------|---------|---------|------|------|
| KTLVLSNLSYSATKE        | 1396.7682 | 698.09  | 2 ##### | 3.91 | 0.58 |
| KTLVLSNLSYSATKE        | 1396.7682 | 698.09  | 2 ##### | 3.92 | 0.58 |
| KTLVLSNLSYSATKE        | 1396.7682 | 698.08  | 2 ##### | 3.92 | 0.60 |
| KTLVLSNLSYSATKE        | 1396.7682 | 698.08  | 2 ##### | 4.02 | 0.61 |
| KTLVLSNLSYSATKE        | 1396.7682 | 698.09  | 2 ##### | 4.05 | 0.58 |
| KTLVLSNLSYSATKE        | 1396.7682 | 698.09  | 2 ##### | 4.20 | 0.59 |
| KTNEAQAIETARA          | 1203.5964 | 601.62  | 2 ##### | 2.97 | 0.36 |
| KTNEAQAIETARA          | 1203.5964 | 601.58  | 2 ##### | 3.21 | 0.45 |
| KTNEAQAIETARA          | 1203.5964 | 601.62  | 2 ##### | 3.34 | 0.37 |
| KTNEAQAIETARA          | 1203.5964 | 601.60  | 2 ##### | 3.46 | 0.40 |
| KTNEAQAIETARA          | 1203.5964 | 601.58  | 2 ##### | 3.60 | 0.43 |
| KTNVSGGAIALGHPLGGSGSRI | 1807.9409 | 602.45  | 3 ##### | 3.74 | 0.58 |
| KTPAGLQVLNDYLADKS      | 1617.8483 | 808.62  | 2 ##### | 5.03 | 0.61 |
| KTPAGLQVLNDYLADKS      | 1617.8483 | 808.64  | 2 ##### | 5.16 | 0.56 |
| KTPAGLQVLNDYLADKS      | 1617.8483 | 808.64  | 2 ##### | 5.28 | 0.57 |
| KTPSSDVLVFDYTKH        | 1471.7314 | 735.66  | 2 ##### | 3.43 | 0.42 |
| KTPSSDVLVFDYTKH        | 1471.7314 | 735.62  | 2 ##### | 3.96 | 0.48 |
| KTPSSDVLVFDYTKH        | 1471.7314 | 735.58  | 2 ##### | 4.05 | 0.56 |
| KTPVEPEVAIHRI          | 1247.6743 | 623.69  | 2 ##### | 2.56 | 0.29 |
| KTPVEPEVAIHRI          | 1247.6743 | 623.65  | 2 ##### | 2.61 | 0.37 |
| KTSFFQALGITTKI         | 1313.7100 | 656.58  | 2 ##### | 2.82 | 0.55 |
| KTSFFQALGITTKI         | 1313.7100 | 656.57  | 2 ##### | 3.39 | 0.57 |
| KTSFFQALGITTKI         | 1313.7100 | 656.57  | 2 ##### | 3.47 | 0.58 |
| KTSFFQALGITTKI         | 1313.7100 | 656.53  | 2 ##### | 3.54 | 0.64 |
| KTSFFQALGITTKI         | 1313.7100 | 656.54  | 2 ##### | 3.63 | 0.63 |
| KTSFFQALGITTKI         | 1313.7100 | 656.56  | 2 ##### | 3.93 | 0.59 |
| KTSIAIDTIINQKR         | 1316.7421 | 658.16  | 2 ##### | 2.87 | 0.42 |
| KTTQVPQYILDDFIQNDRA    | 2066.0188 | 1032.77 | 2 ##### | 3.85 | 0.48 |
| KTTQVPQYILDDFIQNDRA    | 2066.0188 | 1032.72 | 2 ##### | 3.95 | 0.57 |
| KTTQVPQYILDDFIQNDRA    | 2066.0188 | 1032.74 | 2 ##### | 4.04 | 0.54 |
| KTVDNFVALATGEKG        | 1364.7056 | 682.28  | 2 ##### | 2.78 | 0.15 |
| KTVDNFVALATGEKG        | 1364.7056 | 682.20  | 2 ##### | 3.08 | 0.30 |
| KTVDNFVALATGEKG        | 1364.7056 | 682.12  | 2 ##### | 3.42 | 0.46 |
| KTVDNFVALATGEKG        | 1364.7056 | 682.14  | 2 ##### | 3.62 | 0.43 |
| KTVDNFVALATGEKG        | 1364.7056 | 682.12  | 2 ##### | 3.84 | 0.46 |
| KTVDNFVALATGEKG        | 1364.7056 | 682.13  | 2 ##### | 3.84 | 0.45 |
| KTVDNFVALATGEKG        | 1364.7056 | 682.08  | 2 ##### | 3.97 | 0.54 |
| KTVDNFVALATGEKG        | 1364.7056 | 682.11  | 2 ##### | 4.00 | 0.49 |
| KTVDNFVALATGEKG        | 1364.7056 | 682.12  | 2 ##### | 4.04 | 0.46 |
| KTVDNFVALATGEKG        | 1364.7056 | 682.11  | 2 ##### | 4.23 | 0.48 |
| KTVDNFVALATGEKG        | 1364.7056 | 682.11  | 2 ##### | 4.31 | 0.49 |
| KTVEAEEAAHGTVTRH       | 1341.6757 | 670.59  | 2 ##### | 3.65 | 0.49 |
| KTVEAEEAAHGTVTRH       | 1341.6757 | 670.66  | 2 ##### | 3.67 | 0.36 |
| KTVEAEEAAHGTVTRH       | 1341.6757 | 670.59  | 2 ##### | 3.69 | 0.50 |
| KTVEAEEAAHGTVTRH       | 1341.6757 | 670.60  | 2 ##### | 3.78 | 0.47 |
| KTVEAEEAAHGTVTRH       | 1341.6757 | 670.60  | 2 ##### | 3.81 | 0.48 |
| KTVEAEEAAHGTVTRH       | 1341.6757 | 670.60  | 2 ##### | 3.84 | 0.48 |
| KTVEAEEAAHGTVTRH       | 1341.6757 | 670.57  | 2 ##### | 3.85 | 0.53 |
| KTVTNAWTVPAYFNDSQRQ    | 1981.9978 | 990.70  | 2 ##### | 3.52 | 0.61 |
| KTVTNAWTVPAYFNDSQRQ    | 1981.9978 | 990.74  | 2 ##### | 3.62 | 0.51 |
| KTVTNAWTVPAYFNDSQRQ    | 1981.9978 | 990.69  | 2 ##### | 3.63 | 0.61 |
| KTVTNAWTVPAYFNDSQRQ    | 1981.9978 | 990.72  | 2 ##### | 3.79 | 0.55 |
| KTVTNAWTVPAYFNDSQRQ    | 1981.9978 | 660.52  | 3 ##### | 3.84 | 0.43 |
| KTVTNAWTVPAYFNDSQRQ    | 1981.9978 | 990.69  | 2 ##### | 3.85 | 0.62 |
| KTVTNAWTVPAYFNDSQRQ    | 1981.9978 | 990.75  | 2 ##### | 3.86 | 0.50 |
| KTVTNAWTVPAYFNDSQRQ    | 1981.9978 | 990.73  | 2 ##### | 3.88 | 0.53 |

|                      |           |        |         |      |      |
|----------------------|-----------|--------|---------|------|------|
| KTVTNAWVTVPAYFNDSQRQ | 1981.9978 | 990.73 | 2 ##### | 3.98 | 0.53 |
| KTVTNAWVTVPAYFNDSQRQ | 1981.9978 | 990.74 | 2 ##### | 3.99 | 0.53 |
| KTVTNAWVTVPAYFNDSQRQ | 1981.9978 | 990.70 | 2 ##### | 4.08 | 0.60 |
| KTVTNAWVTVPAYFNDSQRQ | 1981.9978 | 990.73 | 2 ##### | 4.14 | 0.53 |
| KTVTNAWVTVPAYFNDSQRQ | 1981.9978 | 990.71 | 2 ##### | 4.18 | 0.57 |
| KTVTNAWVTVPAYFNDSQRQ | 1981.9978 | 660.47 | 3 ##### | 4.62 | 0.58 |
| KTYFPHFDVSHGSAQVKG   | 1819.8762 | 606.43 | 3 ##### | 3.02 | 0.59 |
| KTYFPHFDVSHGSAQVKG   | 1819.8762 | 909.61 | 2 ##### | 3.04 | 0.65 |
| KTYFPHFDVSHGSAQVKG   | 1819.8762 | 909.60 | 2 ##### | 3.40 | 0.67 |
| KTYFPHFDVSHGSAQVKG   | 1819.8762 | 909.60 | 2 ##### | 3.61 | 0.67 |
| KTYFPHFDVSHGSAQVKG   | 1819.8762 | 909.65 | 2 ##### | 3.61 | 0.58 |
| KTYFPHFDVSHGSAQVKG   | 1819.8762 | 909.61 | 2 ##### | 4.36 | 0.65 |
| KVADIALHYANKY        | 1214.6528 | 607.18 | 2 ##### | 2.60 | 0.30 |
| KVAEIEHAEKEKM        | 1282.6638 | 641.16 | 2 ##### | 2.67 | 0.35 |
| KVAEIEHAEKEKM        | 1282.6638 | 641.17 | 2 ##### | 2.84 | 0.32 |
| KVAEIEHAEKEKM        | 1282.6638 | 641.16 | 2 ##### | 3.07 | 0.35 |
| KVAEQTPLTALYVANLIKE  | 1844.0527 | 921.76 | 2 ##### | 4.47 | 0.54 |
| KVAEQTPLTALYVANLIKE  | 1844.0527 | 921.79 | 2 ##### | 4.87 | 0.47 |
| KVAGQDGSVVQFKI       | 1234.6426 | 617.13 | 2 ##### | 2.60 | 0.38 |
| KVAGQDGSVVQFKI       | 1234.6426 | 617.08 | 2 ##### | 2.90 | 0.49 |
| KVAGQDGSVVQFKI       | 1234.6426 | 617.05 | 2 ##### | 2.98 | 0.54 |
| KVAGQDGSVVQFKI       | 1234.6426 | 617.07 | 2 ##### | 3.15 | 0.50 |
| KVAGQDGSVVQFKI       | 1234.6426 | 617.06 | 2 ##### | 3.18 | 0.53 |
| KVANVSLALYKQ         | 1190.7144 | 595.11 | 2 ##### | 2.67 | 0.49 |
| KVANVSLALYKQ         | 1190.7144 | 595.15 | 2 ##### | 2.95 | 0.40 |
| KVANVSLALYKQ         | 1190.7144 | 595.20 | 2 ##### | 3.02 | 0.31 |
| KVAQGVSGAVQDKG       | 1158.6113 | 579.18 | 2 ##### | 3.05 | 0.26 |
| KVAQGVSGAVQDKG       | 1158.6113 | 579.15 | 2 ##### | 3.42 | 0.31 |
| KVAQGVSGAVQDKG       | 1158.6113 | 579.10 | 2 ##### | 3.82 | 0.40 |
| KVAVGELTDEDVKM       | 1274.6475 | 637.27 | 2 ##### | 3.04 | 0.11 |
| KVAVGELTDEDVKM       | 1274.6475 | 637.15 | 2 ##### | 3.07 | 0.35 |
| KVAVGELTDEDVKM       | 1274.6475 | 637.12 | 2 ##### | 3.31 | 0.41 |
| KVAVGELTDEDVKM       | 1274.6475 | 637.08 | 2 ##### | 3.38 | 0.49 |
| KVAVGELTDEDVKM       | 1274.6475 | 637.10 | 2 ##### | 3.99 | 0.45 |
| KVAVLGASGGIGQPLSLLKN | 1793.0895 | 896.23 | 2 ##### | 5.03 | 0.63 |
| KVAVLGASGGIGQPLSLLKN | 1793.0895 | 896.26 | 2 ##### | 5.46 | 0.56 |
| KVDATEESDLAQQYGVRG   | 1780.8348 | 890.24 | 2 ##### | 2.53 | 0.35 |
| KVDATEESDLAQQYGVRG   | 1780.8348 | 890.21 | 2 ##### | 3.12 | 0.42 |
| KVDATEESDLAQQYGVRG   | 1780.8348 | 890.10 | 2 ##### | 4.66 | 0.63 |
| KVDATEESDLAQQYGVRG   | 1780.8348 | 890.12 | 2 ##### | 4.83 | 0.59 |
| KVDATEESDLAQQYGVRG   | 1780.8348 | 890.11 | 2 ##### | 4.99 | 0.61 |
| KVDATEESDLAQQYGVRG   | 1780.8348 | 890.15 | 2 ##### | 5.14 | 0.53 |
| KVDATEESDLAQQYGVRG   | 1780.8348 | 890.09 | 2 ##### | 5.25 | 0.66 |
| KVDATEQTDLAKR        | 1190.5900 | 595.04 | 2 ##### | 2.57 | 0.51 |
| KVDATEQTDLAKR        | 1190.5900 | 595.06 | 2 ##### | 2.68 | 0.48 |
| KVDATEQTDLAKR        | 1190.5900 | 595.05 | 2 ##### | 3.28 | 0.48 |
| KVDATEQTDLAKR        | 1190.5900 | 595.02 | 2 ##### | 3.34 | 0.55 |
| KVDATEQTDLAKR        | 1190.5900 | 595.02 | 2 ##### | 3.93 | 0.55 |
| KVDATEQTDLAKR        | 1190.5900 | 595.02 | 2 ##### | 4.11 | 0.55 |
| KVDATEQTDLAKR        | 1190.5900 | 595.03 | 2 ##### | 4.27 | 0.54 |
| KVDFPQDQLATLTGRI     | 1560.8016 | 780.25 | 2 ##### | 2.53 | 0.30 |
| KVDFPQDQLATLTGRI     | 1560.8016 | 780.17 | 2 ##### | 3.57 | 0.46 |
| KVDFPQDQLATLTGRI     | 1560.8016 | 780.19 | 2 ##### | 3.66 | 0.42 |
| KVDFPQDQLATLTGRI     | 1560.8016 | 780.23 | 2 ##### | 3.93 | 0.34 |
| KVDFPQDQLATLTGRI     | 1560.8016 | 780.18 | 2 ##### | 4.06 | 0.44 |
| KVDNDENEHQLSLRT      | 1568.7300 | 784.14 | 2 ##### | 3.51 | 0.46 |

|                           |           |         |         |      |      |
|---------------------------|-----------|---------|---------|------|------|
| KVDNDENEHQLSLRT           | 1568.7300 | 784.15  | 2 ##### | 3.64 | 0.43 |
| KVDNDENEHQLSLRT           | 1568.7300 | 784.18  | 2 ##### | 3.65 | 0.37 |
| KVDNDENEHQLSLRT           | 1568.7300 | 784.20  | 2 ##### | 3.68 | 0.34 |
| KVDNDENEHQLSLRT           | 1568.7300 | 784.18  | 2 ##### | 3.84 | 0.37 |
| KVDNDENEHQLSLRT           | 1568.7300 | 784.17  | 2 ##### | 3.89 | 0.39 |
| KVDNDENEHQLSLRT           | 1568.7300 | 784.17  | 2 ##### | 4.05 | 0.39 |
| KVDNSSLTGESEPQTRS         | 1619.7507 | 809.68  | 2 ##### | 3.99 | 0.40 |
| KVEGSDITGIEEIVIPKK        | 1698.9160 | 849.39  | 2 ##### | 3.05 | 0.13 |
| KVEGSEPTTTPFNLFIGNLNPKNKS | 2288.1558 | 1143.75 | 2 ##### | 3.13 | 0.65 |
| KVEGSEPTTTPFNLFIGNLNPKNKS | 2288.1558 | 1143.77 | 2 ##### | 3.13 | 0.61 |
| KVEGSEPTTTPFNLFIGNLNPKNKS | 2288.1558 | 1143.77 | 2 ##### | 3.51 | 0.62 |
| KVEIIANDQGNRT             | 1228.6281 | 614.22  | 2 ##### | 2.76 | 0.19 |
| KVEIIANDQGNRT             | 1228.6281 | 614.12  | 2 ##### | 3.37 | 0.39 |
| KVEIIANDQGNRT             | 1228.6281 | 614.12  | 2 ##### | 3.47 | 0.40 |
| KVEIIANDQGNRT             | 1228.6281 | 614.08  | 2 ##### | 3.70 | 0.47 |
| KVELVPPTPAEIPAIQSVKK      | 1989.1267 | 994.28  | 2 ##### | 2.76 | 0.58 |
| KVELVPPTPAEIPAIQSVKK      | 1989.1267 | 994.29  | 2 ##### | 3.06 | 0.54 |
| KVEQLGAEGNVEESQKV         | 1616.7762 | 808.15  | 2 ##### | 4.05 | 0.47 |
| KVFLENVIRD                | 989.5778  | 494.60  | 2 ##### | 2.51 | 0.38 |
| KVFLENVIRD                | 989.5778  | 494.63  | 2 ##### | 2.59 | 0.32 |
| KVFLENVIRD                | 989.5778  | 494.62  | 2 ##### | 2.65 | 0.34 |
| KVFLENVIRD                | 989.5778  | 494.64  | 2 ##### | 2.79 | 0.30 |
| KVFSDEVQQAQLSTIRS         | 1848.9451 | 924.34  | 2 ##### | 3.98 | 0.27 |
| KVFSDEVQQAQLSTIRS         | 1848.9451 | 924.34  | 2 ##### | 4.17 | 0.27 |
| KVGGTSDVEVNEKK            | 1233.5957 | 616.60  | 2 ##### | 3.16 | 0.40 |
| KVGGTSDVEVNEKK            | 1233.5957 | 616.60  | 2 ##### | 3.27 | 0.40 |
| KVGGTSDVEVNEKK            | 1233.5957 | 616.57  | 2 ##### | 3.36 | 0.45 |
| KVGGTSDVEVNEKK            | 1233.5957 | 616.56  | 2 ##### | 3.37 | 0.48 |
| KVGGTSDVEVNEKK            | 1233.5957 | 616.53  | 2 ##### | 3.65 | 0.54 |
| KVGGTSDVEVNEKK            | 1233.5957 | 616.56  | 2 ##### | 3.67 | 0.47 |
| KVGGTSDVEVNEKK            | 1233.5957 | 616.52  | 2 ##### | 3.70 | 0.55 |
| KVGGTSDVEVNEKK            | 1233.5957 | 616.56  | 2 ##### | 3.94 | 0.48 |
| KVGGTSDVEVNEKK            | 1233.5957 | 616.53  | 2 ##### | 4.13 | 0.53 |
| KVGGTSDVEVNEKKD           | 1361.6907 | 680.75  | 2 ##### | 2.89 | 0.20 |
| KVGINYQPPTVVPGGDLAKV      | 1824.9855 | 912.23  | 2 ##### | 2.91 | 0.52 |
| KVGINYQPPTVVPGGDLAKV      | 1824.9855 | 912.31  | 2 ##### | 2.97 | 0.37 |
| KVGINYQPPTVVPGGDLAKV      | 1824.9855 | 912.28  | 2 ##### | 3.16 | 0.42 |
| KVGINYQPPTVVPGGDLAKV      | 1824.9855 | 912.20  | 2 ##### | 3.27 | 0.58 |
| KVGINYQPPTVVPGGDLAKV      | 1824.9855 | 912.24  | 2 ##### | 3.33 | 0.51 |
| KVGINYQPPTVVPGGDLAKV      | 1824.9855 | 912.29  | 2 ##### | 3.33 | 0.40 |
| KVGINYQPPTVVPGGDLAKV      | 1824.9855 | 912.24  | 2 ##### | 3.38 | 0.51 |
| KVGINYQPPTVVPGGDLAKV      | 1824.9855 | 912.22  | 2 ##### | 3.38 | 0.54 |
| KVGINYQPPTVVPGGDLAKV      | 1824.9855 | 912.20  | 2 ##### | 3.40 | 0.58 |
| KVGINYQPPTVVPGGDLAKV      | 1824.9855 | 912.26  | 2 ##### | 3.40 | 0.47 |
| KVGINYQPPTVVPGGDLAKV      | 1824.9855 | 912.23  | 2 ##### | 3.40 | 0.53 |
| KVGINYQPPTVVPGGDLAKV      | 1824.9855 | 912.24  | 2 ##### | 3.42 | 0.50 |
| KVGINYQPPTVVPGGDLAKV      | 1824.9855 | 912.42  | 2 ##### | 3.42 | 0.14 |
| KVGINYQPPTVVPGGDLAKV      | 1824.9855 | 912.21  | 2 ##### | 3.44 | 0.57 |
| KVGINYQPPTVVPGGDLAKV      | 1824.9855 | 912.24  | 2 ##### | 3.45 | 0.51 |
| KVGINYQPPTVVPGGDLAKV      | 1824.9855 | 912.23  | 2 ##### | 3.46 | 0.52 |
| KVGINYQPPTVVPGGDLAKV      | 1824.9855 | 912.21  | 2 ##### | 3.47 | 0.57 |
| KVGINYQPPTVVPGGDLAKV      | 1824.9855 | 912.21  | 2 ##### | 3.54 | 0.56 |
| KVGINYQPPTVVPGGDLAKV      | 1824.9855 | 912.25  | 2 ##### | 3.62 | 0.49 |
| KVGINYQPPTVVPGGDLAKV      | 1824.9855 | 912.21  | 2 ##### | 3.64 | 0.57 |
| KVGINYQPPTVVPGGDLAKV      | 1824.9855 | 912.24  | 2 ##### | 3.71 | 0.51 |
| KVGINYQPPTVVPGGDLAKV      | 1824.9855 | 912.20  | 2 ##### | 3.73 | 0.59 |

|                       |           |        |         |      |      |
|-----------------------|-----------|--------|---------|------|------|
| KVGINYQPPTVVPGDLAKV   | 1824.9855 | 912.22 | 2 ##### | 3.82 | 0.54 |
| KVGINYQPPTVVPGDLAKV   | 1824.9855 | 912.20 | 2 ##### | 3.92 | 0.58 |
| KVGINYQPPTVVPGDLAKV   | 1824.9855 | 912.17 | 2 ##### | 4.00 | 0.64 |
| KVGINYQPPTVVPGDLAKV   | 1824.9855 | 912.22 | 2 ##### | 4.08 | 0.55 |
| KVIAINVDDPDAANYKD     | 1617.8119 | 808.67 | 2 ##### | 3.46 | 0.48 |
| KVIAINVDDPDAANYKD     | 1617.8119 | 808.60 | 2 ##### | 3.55 | 0.61 |
| KVIAINVDDPDAANYKD     | 1617.8119 | 808.66 | 2 ##### | 3.94 | 0.50 |
| KVLAQNSGFDLQETLVKV    | 1761.9381 | 880.70 | 2 ##### | 3.92 | 0.53 |
| KVLAQNSGFDLQETLVKV    | 1761.9381 | 880.66 | 2 ##### | 4.34 | 0.62 |
| KVLDSGAPIKIPVGPETLGRI | 1919.0961 | 639.55 | 3 ##### | 4.20 | 0.45 |
| KVLDSGAPIKIPVGPETLGRI | 1919.0961 | 639.50 | 3 ##### | 4.81 | 0.61 |
| KVLELIQSGVAEGAKL      | 1413.7948 | 706.70 | 2 ##### | 4.27 | 0.40 |
| KVLELIQSGVAEGAKL      | 1413.7948 | 706.68 | 2 ##### | 4.43 | 0.43 |
| KVLELIQSGVAEGAKL      | 1413.7948 | 706.69 | 2 ##### | 4.57 | 0.42 |
| KVLELIQSGVAEGAKL      | 1413.7948 | 706.70 | 2 ##### | 4.65 | 0.40 |
| KVLELIQSGVAEGAKL      | 1413.7948 | 706.69 | 2 ##### | 4.66 | 0.41 |
| KVLELIQSGVAEGAKL      | 1413.7948 | 706.66 | 2 ##### | 4.72 | 0.48 |
| KVLELIQSGVAEGAKL      | 1413.7948 | 706.69 | 2 ##### | 4.77 | 0.42 |
| KVLEQLTGQTPVFSKA      | 1546.8475 | 773.18 | 2 ##### | 2.68 | 0.49 |
| KVLEQLTGQTPVFSKA      | 1546.8475 | 773.15 | 2 ##### | 3.28 | 0.54 |
| KVLEQLTGQTPVFSKA      | 1546.8475 | 773.21 | 2 ##### | 3.31 | 0.43 |
| KVLEQLTGQTPVFSKA      | 1546.8475 | 773.18 | 2 ##### | 3.34 | 0.49 |
| KVLEQLTGQTPVFSKA      | 1546.8475 | 773.18 | 2 ##### | 3.68 | 0.48 |
| KVLEQLTGQTPVFSKA      | 1546.8475 | 773.11 | 2 ##### | 4.04 | 0.63 |
| KVLEQLTGQTPVFSKA      | 1546.8475 | 773.16 | 2 ##### | 4.20 | 0.52 |
| KVLEQLTGQTPVFSKA      | 1546.8475 | 773.14 | 2 ##### | 4.44 | 0.56 |
| KVLETAEDIQERR         | 1302.6536 | 651.14 | 2 ##### | 2.50 | 0.38 |
| KVLETAEDIQERR         | 1302.6536 | 651.14 | 2 ##### | 2.96 | 0.37 |
| KVLETAEDIQERR         | 1302.6536 | 651.09 | 2 ##### | 3.10 | 0.48 |
| KVLPGVDALENSV         | 1083.6045 | 541.53 | 2 ##### | 3.05 | 0.55 |
| KVLPLIGSQEQKSQGSHT    | 1835.9974 | 917.85 | 2 ##### | 2.61 | 0.29 |
| KVLPLIGSQEQKSQGSHT    | 1835.9974 | 917.89 | 2 ##### | 2.70 | 0.22 |
| KVLPLIGSQEQKSQGSHT    | 1835.9974 | 917.83 | 2 ##### | 2.82 | 0.34 |
| KVLPLIGSQEQKSQGSHT    | 1835.9974 | 917.82 | 2 ##### | 2.88 | 0.36 |
| KVLPLIGSQEQKSQGSHT    | 1835.9974 | 917.91 | 2 ##### | 2.88 | 0.17 |
| KVLPLIGSQEQKSQGSHT    | 1835.9974 | 917.82 | 2 ##### | 3.05 | 0.35 |
| KVLQATVAVGSGGKG       | 1285.7474 | 642.82 | 2 ##### | 2.81 | 0.11 |
| KVLQATVAVGSGGKG       | 1285.7474 | 642.61 | 2 ##### | 3.77 | 0.53 |
| KVLQATVAVGSGGKG       | 1285.7474 | 642.55 | 2 ##### | 4.14 | 0.65 |
| KVLQATVAVGSGGKG       | 1285.7474 | 642.54 | 2 ##### | 4.83 | 0.66 |
| KVLQATVAVGSGGKG       | 1285.7474 | 642.55 | 2 ##### | 5.04 | 0.65 |
| KVLVDINNPEPLIQTAKT    | 1763.9902 | 881.83 | 2 ##### | 2.70 | 0.33 |
| KVLVDINNPEPLIQTAKT    | 1763.9902 | 881.82 | 2 ##### | 3.81 | 0.35 |
| KVLVDINNPEPLIQTAKT    | 1763.9902 | 881.72 | 2 ##### | 4.04 | 0.56 |
| KVLVDINNPEPLIQTAKT    | 1763.9902 | 881.76 | 2 ##### | 4.47 | 0.47 |
| KVLVDINNPEPLIQTAKT    | 1763.9902 | 881.72 | 2 ##### | 4.55 | 0.55 |
| KVLVDINNPEPLIQTAKT    | 1763.9902 | 881.72 | 2 ##### | 4.68 | 0.56 |
| KVLVDINNPEPLIQTAKT    | 1763.9902 | 881.73 | 2 ##### | 4.69 | 0.52 |
| KVLVDINNPEPLIQTAKT    | 1763.9902 | 881.79 | 2 ##### | 4.71 | 0.41 |
| KVLVDINNPEPLIQTAKT    | 1763.9902 | 881.72 | 2 ##### | 4.94 | 0.55 |
| KVLVDINNPEPLIQTAKT    | 1763.9902 | 881.73 | 2 ##### | 4.99 | 0.53 |
| KVLVDINNPEPLIQTAKT    | 1763.9902 | 881.69 | 2 ##### | 5.10 | 0.61 |
| KVLVGANFEEVAFDEKK     | 1666.8323 | 833.15 | 2 ##### | 3.77 | 0.52 |
| KVLVGANFEEVAFDEKK     | 1666.8323 | 833.14 | 2 ##### | 4.25 | 0.56 |
| KVNADEVGGEALGRL       | 1286.6335 | 643.12 | 2 ##### | 2.87 | 0.39 |
| KVNADEVGGEALGRL       | 1286.6335 | 643.09 | 2 ##### | 4.01 | 0.46 |

|                 |           |        |         |      |      |
|-----------------|-----------|--------|---------|------|------|
| KVNADEVGGEALGRL | 1286.6335 | 643.01 | 2 ##### | 4.27 | 0.60 |
| KVNPDEVGGEALGRL | 1312.6492 | 656.12 | 2 ##### | 2.99 | 0.41 |
| KVNPDEVGGEALGRL | 1312.6492 | 656.13 | 2 ##### | 3.15 | 0.40 |
| KVNSDEVGGEALGRL | 1302.6284 | 651.18 | 2 ##### | 3.01 | 0.27 |
| KVNSDEVGGEALGRL | 1302.6284 | 651.11 | 2 ##### | 3.52 | 0.41 |
| KVNSDEVGGEALGRL | 1302.6284 | 651.14 | 2 ##### | 3.52 | 0.35 |
| KVNSDEVGGEALGRL | 1302.6284 | 651.12 | 2 ##### | 3.53 | 0.38 |
| KVNSDEVGGEALGRL | 1302.6284 | 651.12 | 2 ##### | 3.72 | 0.39 |
| KVNSDEVGGEALGRL | 1302.6284 | 651.10 | 2 ##### | 3.82 | 0.44 |
| KVNTAAFLTPLELKA | 1416.8097 | 708.19 | 2 ##### | 4.47 | 0.42 |
| KVNVEEVGGEALGRL | 1328.6804 | 664.24 | 2 ##### | 2.55 | 0.21 |
| KVNVEEVGGEALGRL | 1328.6804 | 664.18 | 2 ##### | 2.57 | 0.33 |
| KVNVEEVGGEALGRL | 1328.6804 | 664.15 | 2 ##### | 2.76 | 0.37 |
| KVNVEEVGGEALGRL | 1328.6804 | 664.17 | 2 ##### | 2.76 | 0.34 |
| KVNVEEVGGEALGRL | 1328.6804 | 664.16 | 2 ##### | 2.79 | 0.36 |
| KVNVEEVGGEALGRL | 1328.6804 | 664.18 | 2 ##### | 2.79 | 0.32 |
| KVNVEEVGGEALGRL | 1328.6804 | 664.20 | 2 ##### | 2.91 | 0.28 |
| KVNVEEVGGEALGRL | 1328.6804 | 664.18 | 2 ##### | 2.91 | 0.31 |
| KVNVEEVGGEALGRL | 1328.6804 | 664.21 | 2 ##### | 2.99 | 0.27 |
| KVNVEEVGGEALGRL | 1328.6804 | 664.17 | 2 ##### | 2.99 | 0.34 |
| KVNVEEVGGEALGRL | 1328.6804 | 664.20 | 2 ##### | 3.00 | 0.27 |
| KVNVEEVGGEALGRL | 1328.6804 | 664.20 | 2 ##### | 3.03 | 0.28 |
| KVNVEEVGGEALGRL | 1328.6804 | 664.12 | 2 ##### | 3.06 | 0.44 |
| KVNVEEVGGEALGRL | 1328.6804 | 664.17 | 2 ##### | 3.12 | 0.34 |
| KVNVEEVGGEALGRL | 1328.6804 | 664.20 | 2 ##### | 3.15 | 0.29 |
| KVNVEEVGGEALGRL | 1328.6804 | 664.19 | 2 ##### | 3.17 | 0.30 |
| KVNVEEVGGEALGRL | 1328.6804 | 664.19 | 2 ##### | 3.18 | 0.30 |
| KVNVEEVGGEALGRL | 1328.6804 | 664.17 | 2 ##### | 3.18 | 0.33 |
| KVNVEEVGGEALGRL | 1328.6804 | 664.14 | 2 ##### | 3.19 | 0.41 |
| KVNVEEVGGEALGRL | 1328.6804 | 664.16 | 2 ##### | 3.20 | 0.37 |
| KVNVEEVGGEALGRL | 1328.6804 | 664.18 | 2 ##### | 3.23 | 0.33 |
| KVNVEEVGGEALGRL | 1328.6804 | 664.18 | 2 ##### | 3.23 | 0.32 |
| KVNVEEVGGEALGRL | 1328.6804 | 664.18 | 2 ##### | 3.24 | 0.32 |
| KVNVEEVGGEALGRL | 1328.6804 | 664.17 | 2 ##### | 3.25 | 0.34 |
| KVNVEEVGGEALGRL | 1328.6804 | 664.15 | 2 ##### | 3.28 | 0.37 |
| KVNVEEVGGEALGRL | 1328.6804 | 664.16 | 2 ##### | 3.29 | 0.36 |
| KVNVEEVGGEALGRL | 1328.6804 | 664.19 | 2 ##### | 3.29 | 0.30 |
| KVNVEEVGGEALGRL | 1328.6804 | 664.14 | 2 ##### | 3.31 | 0.41 |
| KVNVEEVGGEALGRL | 1328.6804 | 664.15 | 2 ##### | 3.33 | 0.38 |
| KVNVEEVGGEALGRL | 1328.6804 | 664.18 | 2 ##### | 3.33 | 0.33 |
| KVNVEEVGGEALGRL | 1328.6804 | 664.17 | 2 ##### | 3.34 | 0.34 |
| KVNVEEVGGEALGRL | 1328.6804 | 664.14 | 2 ##### | 3.34 | 0.40 |
| KVNVEEVGGEALGRL | 1328.6804 | 664.13 | 2 ##### | 3.35 | 0.42 |
| KVNVEEVGGEALGRL | 1328.6804 | 664.13 | 2 ##### | 3.37 | 0.41 |
| KVNVEEVGGEALGRL | 1328.6804 | 664.18 | 2 ##### | 3.37 | 0.33 |
| KVNVEEVGGEALGRL | 1328.6804 | 664.17 | 2 ##### | 3.37 | 0.34 |
| KVNVEEVGGEALGRL | 1328.6804 | 664.16 | 2 ##### | 3.38 | 0.35 |
| KVNVEEVGGEALGRL | 1328.6804 | 664.15 | 2 ##### | 3.39 | 0.38 |
| KVNVEEVGGEALGRL | 1328.6804 | 664.18 | 2 ##### | 3.44 | 0.32 |
| KVNVEEVGGEALGRL | 1328.6804 | 664.17 | 2 ##### | 3.44 | 0.34 |
| KVNVEEVGGEALGRL | 1328.6804 | 664.13 | 2 ##### | 3.45 | 0.42 |
| KVNVEEVGGEALGRL | 1328.6804 | 664.13 | 2 ##### | 3.45 | 0.42 |
| KVNVEEVGGEALGRL | 1328.6804 | 664.14 | 2 ##### | 3.46 | 0.40 |
| KVNVEEVGGEALGRL | 1328.6804 | 664.15 | 2 ##### | 3.46 | 0.38 |
| KVNVEEVGGEALGRL | 1328.6804 | 664.17 | 2 ##### | 3.47 | 0.33 |
| KVNVEEVGGEALGRL | 1328.6804 | 664.13 | 2 ##### | 3.47 | 0.42 |

|                 |           |        |         |      |      |
|-----------------|-----------|--------|---------|------|------|
| KVNVEEVGGGALGRL | 1328.6804 | 664.13 | 2 ##### | 3.48 | 0.42 |
| KVNVEEVGGGALGRL | 1328.6804 | 664.15 | 2 ##### | 3.48 | 0.38 |
| KVNVEEVGGGALGRL | 1328.6804 | 664.13 | 2 ##### | 3.49 | 0.41 |
| KVNVEEVGGGALGRL | 1328.6804 | 664.16 | 2 ##### | 3.49 | 0.35 |
| KVNVEEVGGGALGRL | 1328.6804 | 664.11 | 2 ##### | 3.49 | 0.46 |
| KVNVEEVGGGALGRL | 1328.6804 | 664.16 | 2 ##### | 3.51 | 0.37 |
| KVNVEEVGGGALGRL | 1328.6804 | 664.18 | 2 ##### | 3.52 | 0.32 |
| KVNVEEVGGGALGRL | 1328.6804 | 664.13 | 2 ##### | 3.52 | 0.42 |
| KVNVEEVGGGALGRL | 1328.6804 | 664.12 | 2 ##### | 3.52 | 0.43 |
| KVNVEEVGGGALGRL | 1328.6804 | 664.18 | 2 ##### | 3.52 | 0.32 |
| KVNVEEVGGGALGRL | 1328.6804 | 664.14 | 2 ##### | 3.53 | 0.39 |
| KVNVEEVGGGALGRL | 1328.6804 | 664.13 | 2 ##### | 3.53 | 0.42 |
| KVNVEEVGGGALGRL | 1328.6804 | 664.16 | 2 ##### | 3.54 | 0.37 |
| KVNVEEVGGGALGRL | 1328.6804 | 664.15 | 2 ##### | 3.55 | 0.38 |
| KVNVEEVGGGALGRL | 1328.6804 | 664.15 | 2 ##### | 3.55 | 0.38 |
| KVNVEEVGGGALGRL | 1328.6804 | 664.14 | 2 ##### | 3.58 | 0.40 |
| KVNVEEVGGGALGRL | 1328.6804 | 664.15 | 2 ##### | 3.59 | 0.39 |
| KVNVEEVGGGALGRL | 1328.6804 | 664.15 | 2 ##### | 3.60 | 0.38 |
| KVNVEEVGGGALGRL | 1328.6804 | 664.16 | 2 ##### | 3.63 | 0.36 |
| KVNVEEVGGGALGRL | 1328.6804 | 664.12 | 2 ##### | 3.64 | 0.43 |
| KVNVEEVGGGALGRL | 1328.6804 | 664.16 | 2 ##### | 3.66 | 0.36 |
| KVNVEEVGGGALGRL | 1328.6804 | 664.14 | 2 ##### | 3.66 | 0.40 |
| KVNVEEVGGGALGRL | 1328.6804 | 664.15 | 2 ##### | 3.66 | 0.39 |
| KVNVEEVGGGALGRL | 1328.6804 | 664.16 | 2 ##### | 3.67 | 0.37 |
| KVNVEEVGGGALGRL | 1328.6804 | 664.16 | 2 ##### | 3.67 | 0.36 |
| KVNVEEVGGGALGRL | 1328.6804 | 664.14 | 2 ##### | 3.68 | 0.40 |
| KVNVEEVGGGALGRL | 1328.6804 | 664.14 | 2 ##### | 3.68 | 0.41 |
| KVNVEEVGGGALGRL | 1328.6804 | 664.15 | 2 ##### | 3.69 | 0.38 |
| KVNVEEVGGGALGRL | 1328.6804 | 664.11 | 2 ##### | 3.69 | 0.46 |
| KVNVEEVGGGALGRL | 1328.6804 | 664.11 | 2 ##### | 3.69 | 0.45 |
| KVNVEEVGGGALGRL | 1328.6804 | 664.14 | 2 ##### | 3.69 | 0.39 |
| KVNVEEVGGGALGRL | 1328.6804 | 664.14 | 2 ##### | 3.70 | 0.41 |
| KVNVEEVGGGALGRL | 1328.6804 | 664.15 | 2 ##### | 3.71 | 0.38 |
| KVNVEEVGGGALGRL | 1328.6804 | 664.14 | 2 ##### | 3.71 | 0.40 |
| KVNVEEVGGGALGRL | 1328.6804 | 664.17 | 2 ##### | 3.71 | 0.34 |
| KVNVEEVGGGALGRL | 1328.6804 | 664.14 | 2 ##### | 3.71 | 0.39 |
| KVNVEEVGGGALGRL | 1328.6804 | 664.14 | 2 ##### | 3.72 | 0.40 |
| KVNVEEVGGGALGRL | 1328.6804 | 664.11 | 2 ##### | 3.73 | 0.46 |
| KVNVEEVGGGALGRL | 1328.6804 | 664.14 | 2 ##### | 3.75 | 0.39 |
| KVNVEEVGGGALGRL | 1328.6804 | 664.13 | 2 ##### | 3.75 | 0.42 |
| KVNVEEVGGGALGRL | 1328.6804 | 664.15 | 2 ##### | 3.75 | 0.38 |
| KVNVEEVGGGALGRL | 1328.6804 | 664.13 | 2 ##### | 3.75 | 0.42 |
| KVNVEEVGGGALGRL | 1328.6804 | 664.12 | 2 ##### | 3.76 | 0.44 |
| KVNVEEVGGGALGRL | 1328.6804 | 664.12 | 2 ##### | 3.76 | 0.44 |
| KVNVEEVGGGALGRL | 1328.6804 | 664.15 | 2 ##### | 3.77 | 0.39 |
| KVNVEEVGGGALGRL | 1328.6804 | 664.17 | 2 ##### | 3.78 | 0.34 |
| KVNVEEVGGGALGRL | 1328.6804 | 664.14 | 2 ##### | 3.79 | 0.40 |
| KVNVEEVGGGALGRL | 1328.6804 | 664.13 | 2 ##### | 3.80 | 0.43 |
| KVNVEEVGGGALGRL | 1328.6804 | 664.14 | 2 ##### | 3.80 | 0.41 |
| KVNVEEVGGGALGRL | 1328.6804 | 664.11 | 2 ##### | 3.83 | 0.46 |
| KVNVEEVGGGALGRL | 1328.6804 | 664.12 | 2 ##### | 3.83 | 0.43 |
| KVNVEEVGGGALGRL | 1328.6804 | 664.14 | 2 ##### | 3.85 | 0.40 |
| KVNVEEVGGGALGRL | 1328.6804 | 664.10 | 2 ##### | 3.86 | 0.49 |
| KVNVEEVGGGALGRL | 1328.6804 | 664.15 | 2 ##### | 3.86 | 0.38 |
| KVNVEEVGGGALGRL | 1328.6804 | 664.14 | 2 ##### | 3.89 | 0.41 |
| KVNVEEVGGGALGRL | 1328.6804 | 664.08 | 2 ##### | 3.90 | 0.52 |

|                    |           |        |         |      |      |
|--------------------|-----------|--------|---------|------|------|
| KVNVEEVGGEALGRL    | 1328.6804 | 664.12 | 2 ##### | 3.90 | 0.44 |
| KVNVEEVGGEALGRL    | 1328.6804 | 664.12 | 2 ##### | 3.91 | 0.44 |
| KVNVEEVGGEALGRL    | 1328.6804 | 664.13 | 2 ##### | 3.91 | 0.42 |
| KVNVEEVGGEALGRL    | 1328.6804 | 664.13 | 2 ##### | 3.93 | 0.41 |
| KVNVEEVGGEALGRL    | 1328.6804 | 664.11 | 2 ##### | 3.97 | 0.46 |
| KVNVEEVGGEALGRL    | 1328.6804 | 664.14 | 2 ##### | 4.00 | 0.40 |
| KVNVEEVGGEALGRL    | 1328.6804 | 664.13 | 2 ##### | 4.02 | 0.42 |
| KVNVEEVGGEALGRL    | 1328.6804 | 664.15 | 2 ##### | 4.04 | 0.38 |
| KVNVEEVGGEALGRL    | 1328.6804 | 664.12 | 2 ##### | 4.05 | 0.43 |
| KVNVEEVGGEALGRL    | 1328.6804 | 664.13 | 2 ##### | 4.05 | 0.41 |
| KVNVEEVGGEALGRL    | 1328.6804 | 664.08 | 2 ##### | 4.06 | 0.52 |
| KVNVEEVGGEALGRL    | 1328.6804 | 664.13 | 2 ##### | 4.08 | 0.42 |
| KVNVEEVGGEALGRL    | 1328.6804 | 664.08 | 2 ##### | 4.14 | 0.52 |
| KVNVEEVGGEALGRL    | 1328.6804 | 664.12 | 2 ##### | 4.28 | 0.43 |
| KVNVEEVGGEALGRL    | 1328.6804 | 664.11 | 2 ##### | 4.30 | 0.46 |
| KVNVEEVGGEALGRL    | 1328.6804 | 664.10 | 2 ##### | 4.34 | 0.48 |
| KVNVEEVGGEALGRL    | 1328.6804 | 664.10 | 2 ##### | 4.37 | 0.48 |
| KVNVEEVGGEALGRL    | 1328.6804 | 664.10 | 2 ##### | 4.43 | 0.49 |
| KVNVEEVGGEALGRL    | 1328.6804 | 664.09 | 2 ##### | 4.43 | 0.51 |
| KVNVEEVGGEALGRL    | 1328.6804 | 664.11 | 2 ##### | 4.46 | 0.46 |
| KVNVEEVGGEALGRL    | 1328.6804 | 664.10 | 2 ##### | 4.46 | 0.49 |
| KVNVEEVGGEALGRL    | 1328.6804 | 664.08 | 2 ##### | 4.51 | 0.53 |
| KVNVEEVGGEALGRL    | 1328.6804 | 664.07 | 2 ##### | 4.53 | 0.54 |
| KVNVEEVGGEALGRL    | 1328.6804 | 664.08 | 2 ##### | 4.56 | 0.52 |
| KVNVEEVGGEALGRL    | 1328.6804 | 664.09 | 2 ##### | 4.67 | 0.49 |
| KVPAINVND SVTKS    | 1256.6844 | 628.03 | 2 ##### | 2.96 | 0.63 |
| KVPAINVND SVTKS    | 1256.6844 | 628.03 | 2 ##### | 3.33 | 0.62 |
| KVPVHDVTDASKV      | 1167.6005 | 583.69 | 2 ##### | 2.71 | 0.22 |
| KVSELKEELKK        | 1074.6041 | 537.23 | 2 ##### | 2.52 | 0.14 |
| KVSELKEELKK        | 1074.6041 | 537.23 | 2 ##### | 2.87 | 0.15 |
| KVSELKEELKK        | 1074.6041 | 537.21 | 2 ##### | 2.93 | 0.19 |
| KVSELKEELKK        | 1074.6041 | 537.23 | 2 ##### | 2.97 | 0.15 |
| KVTADVINA AEKL     | 1130.6052 | 565.03 | 2 ##### | 2.88 | 0.54 |
| KVTADVINA AEKL     | 1130.6052 | 565.01 | 2 ##### | 3.43 | 0.58 |
| KVTADVINA AEKL     | 1130.6052 | 565.00 | 2 ##### | 3.51 | 0.60 |
| KVTADVINA AEKL     | 1130.6052 | 565.04 | 2 ##### | 3.64 | 0.52 |
| KVTADVINA AEKL     | 1130.6052 | 565.04 | 2 ##### | 3.79 | 0.52 |
| KVTAQGPGLPSGNIANKT | 1652.8602 | 826.12 | 2 ##### | 3.44 | 0.62 |
| KVTAQGPGLPSGNIANKT | 1652.8602 | 826.13 | 2 ##### | 3.75 | 0.59 |
| KVTAQGPGLPSGNIANKT | 1652.8602 | 826.19 | 2 ##### | 3.76 | 0.48 |
| KVTAQGPGLPSGNIANKT | 1652.8602 | 826.20 | 2 ##### | 3.93 | 0.47 |
| KVVLAAADLGTEAGVQRL | 1569.8595 | 784.77 | 2 ##### | 2.57 | 0.33 |
| KVLLTGETSTDLKL     | 1375.7679 | 687.63 | 2 ##### | 3.56 | 0.51 |
| KVVTDTDETELARQ     | 1348.6591 | 674.06 | 2 ##### | 3.31 | 0.54 |
| KVVTDTDETELARQ     | 1348.6591 | 674.03 | 2 ##### | 3.40 | 0.59 |
| KVVTDTDETELARQ     | 1348.6591 | 674.03 | 2 ##### | 3.49 | 0.60 |
| KVVTDTDETELARQ     | 1348.6591 | 674.03 | 2 ##### | 3.51 | 0.59 |
| KVVTDTDETELARQ     | 1348.6591 | 674.03 | 2 ##### | 3.53 | 0.61 |
| KVVTDTDETELARQ     | 1348.6591 | 674.03 | 2 ##### | 3.58 | 0.59 |
| KVVTDTDETELARQ     | 1348.6591 | 674.03 | 2 ##### | 3.61 | 0.60 |
| KVVTDTDETELARQ     | 1348.6591 | 674.06 | 2 ##### | 3.70 | 0.53 |
| KVVTDTDETELARQ     | 1348.6591 | 673.99 | 2 ##### | 4.29 | 0.68 |
| KYAVLYQPLFDKR      | 1356.7198 | 678.27 | 2 ##### | 2.94 | 0.18 |
| KYHTINGHNAEVRK     | 1410.6873 | 705.09 | 2 ##### | 2.92 | 0.50 |
| KYHTINGHNAEVRK     | 1410.6873 | 705.18 | 2 ##### | 2.98 | 0.33 |
| KYHTINGHNAEVRK     | 1410.6873 | 705.13 | 2 ##### | 3.02 | 0.44 |

|                        |           |         |         |      |      |
|------------------------|-----------|---------|---------|------|------|
| KYHTINGHNAEVRK         | 1410.6873 | 705.10  | 2 ##### | 3.17 | 0.49 |
| KYHTINGHNAEVRK         | 1410.6873 | 705.13  | 2 ##### | 3.39 | 0.43 |
| KYKPESDELTAEKI         | 1409.6794 | 704.63  | 2 ##### | 2.54 | 0.43 |
| KYKPESDELTAEKI         | 1409.6794 | 704.65  | 2 ##### | 2.74 | 0.38 |
| KYKPESDELTAEKI         | 1409.6794 | 704.66  | 2 ##### | 3.25 | 0.36 |
| KYNLSLLEICELSQEKM      | 1781.8989 | 890.83  | 2 ##### | 2.65 | 0.24 |
| KYNLSLLEICELSQEKM      | 1781.8989 | 890.87  | 2 ##### | 2.82 | 0.17 |
| KYNLSLLEICELSQEKM      | 1781.8989 | 890.83  | 2 ##### | 2.85 | 0.25 |
| KYNLSLLEICELSQEKM      | 1781.8989 | 890.90  | 2 ##### | 2.92 | 0.11 |
| KYPSPFFVFGKI           | 1317.6514 | 658.72  | 2 ##### | 2.68 | 0.21 |
| KYQAVTATLEEKR          | 1252.6420 | 626.07  | 2 ##### | 2.72 | 0.51 |
| KYQAVTATLEEKR          | 1252.6420 | 626.12  | 2 ##### | 3.20 | 0.41 |
| KYQAVTATLEEKR          | 1252.6420 | 626.05  | 2 ##### | 3.30 | 0.53 |
| KYQAVTATLEEKR          | 1252.6420 | 626.08  | 2 ##### | 3.56 | 0.47 |
| KYQAVTATLEEKR          | 1252.6420 | 626.05  | 2 ##### | 3.63 | 0.53 |
| KYSQVLANGLDNKL         | 1321.6747 | 660.73  | 2 ##### | 2.60 | 0.22 |
| KYVWNGELLDIIKN         | 1462.7941 | 731.30  | 2 ##### | 2.64 | 0.20 |
| KYVWNGELLDIIKN         | 1462.7941 | 731.32  | 2 ##### | 2.71 | 0.16 |
| KYVWNGELLDIIKN         | 1462.7941 | 731.33  | 2 ##### | 2.78 | 0.14 |
| KYVWNGELLDIIKN         | 1462.7941 | 731.34  | 2 ##### | 2.81 | 0.12 |
| KYVWNGELLDIIKN         | 1462.7941 | 731.34  | 2 ##### | 2.83 | 0.10 |
| KYVWNGELLDIIKN         | 1462.7941 | 731.33  | 2 ##### | 2.86 | 0.14 |
| KYVWNGELLDIIKN         | 1462.7941 | 731.31  | 2 ##### | 2.89 | 0.17 |
| KYVWNGELLDIIKN         | 1462.7941 | 731.31  | 2 ##### | 2.93 | 0.18 |
| KYVWNGELLDIIKN         | 1462.7941 | 731.31  | 2 ##### | 2.95 | 0.17 |
| KYVWNGELLDIIKN         | 1462.7941 | 731.33  | 2 ##### | 2.95 | 0.13 |
| KYVWNGELLDIIKN         | 1462.7941 | 731.30  | 2 ##### | 3.13 | 0.20 |
| KYVWNGELLDIIKN         | 1462.7941 | 731.31  | 2 ##### | 3.18 | 0.17 |
| PEFLEDPSVLTKD          | 1374.7151 | 687.13  | 2 ##### | 3.28 | 0.46 |
| PEFLEDPSVLTKD          | 1374.7151 | 687.12  | 2 ##### | 3.60 | 0.48 |
| PEFLEDPSVLTKD          | 1374.7151 | 687.11  | 2 ##### | 3.72 | 0.49 |
| PGGLLLGDEAPNFEANTTIGRI | 2142.0825 | 1070.68 | 2 ##### | 4.74 | 0.73 |
| PHPYPALTPEQKK          | 1377.7162 | 688.66  | 2 ##### | 2.59 | 0.39 |
| PHPYPALTPEQKK          | 1377.7162 | 688.61  | 2 ##### | 2.84 | 0.50 |
| PHPYPALTPEQKK          | 1377.7162 | 688.60  | 2 ##### | 2.85 | 0.52 |
| PHPYPALTPEQKK          | 1377.7162 | 688.60  | 2 ##### | 3.06 | 0.52 |
| PPYTIVYFPVRG           | 1351.7408 | 675.66  | 2 ##### | 2.65 | 0.43 |
| PPYTIVYFPVRG           | 1351.7408 | 675.62  | 2 ##### | 2.94 | 0.50 |
| PPYTIVYFPVRG           | 1351.7408 | 675.64  | 2 ##### | 3.35 | 0.47 |
| RAAAEVNQEYGLDPKI       | 1504.7278 | 752.08  | 2 ##### | 3.63 | 0.56 |
| RAAAEVNQEYGLDPKI       | 1504.7278 | 752.11  | 2 ##### | 3.66 | 0.51 |
| RAAAEVNQEYGLDPKI       | 1504.7278 | 752.09  | 2 ##### | 3.76 | 0.55 |
| RAANAASGAGGSSAAAGSRP   | 1433.6727 | 716.54  | 2 ##### | 5.17 | 0.60 |
| RAANAASGAGGSSAAAGSRP   | 1433.6727 | 716.52  | 2 ##### | 5.26 | 0.64 |
| RAAVASLLQSVQVPEFTPKS   | 1885.0430 | 942.24  | 2 ##### | 2.94 | 0.56 |
| RAAVASLLQSVQVPEFTPKS   | 1885.0430 | 942.21  | 2 ##### | 2.98 | 0.61 |
| RAAVASLLQSVQVPEFTPKS   | 1885.0430 | 942.24  | 2 ##### | 3.07 | 0.57 |
| RAAVASLLQSVQVPEFTPKS   | 1885.0430 | 628.20  | 3 ##### | 3.80 | 0.45 |
| RAAVPSGASTGIYEALERD    | 1804.9440 | 902.26  | 2 ##### | 3.03 | 0.42 |
| RAAVPSGASTGIYEALERD    | 1804.9440 | 902.21  | 2 ##### | 3.07 | 0.53 |
| RAAVPSGASTGIYEALERD    | 1804.9440 | 902.25  | 2 ##### | 3.29 | 0.44 |
| RAAVPSGASTGIYEALERD    | 1804.9440 | 902.21  | 2 ##### | 3.39 | 0.53 |
| RAAVPSGASTGIYEALERD    | 1804.9440 | 902.21  | 2 ##### | 3.88 | 0.53 |
| RAAVPSGASTGIYEALERD    | 1804.9440 | 902.18  | 2 ##### | 4.13 | 0.58 |
| RAAVPSGASTGIYEALERD    | 1804.9440 | 902.17  | 2 ##### | 4.54 | 0.61 |
| RAAVPSGASTGIYEALERD    | 1804.9440 | 902.19  | 2 ##### | 4.58 | 0.56 |



|                       |           |        |         |      |      |
|-----------------------|-----------|--------|---------|------|------|
| RAAVPSGASTGIYEALERD   | 1804.9440 | 902.20 | 2 ##### | 4.83 | 0.54 |
| RAAVPSGASTGIYEALERD   | 1804.9440 | 902.21 | 2 ##### | 5.03 | 0.53 |
| RAAVPSGASTGIYEALERD   | 1804.9440 | 902.20 | 2 ##### | 5.15 | 0.54 |
| RAAVPSGASTGIYEALERD   | 1804.9440 | 902.18 | 2 ##### | 5.17 | 0.59 |
| RAAVPSGASTGIYEALERD   | 1804.9440 | 902.21 | 2 ##### | 5.23 | 0.53 |
| RADALQAGASQFETSAAKL   | 1665.8079 | 832.68 | 2 ##### | 2.92 | 0.45 |
| RADALQAGASQFETSAAKL   | 1665.8079 | 832.71 | 2 ##### | 3.83 | 0.39 |
| RADALQAGASQFETSAAKL   | 1665.8079 | 832.62 | 2 ##### | 3.84 | 0.56 |
| RADALQAGASQFETSAAKL   | 1665.8079 | 832.67 | 2 ##### | 3.95 | 0.46 |
| RAEAVESAQAGDRC        | 1203.5601 | 601.53 | 2 ##### | 3.30 | 0.49 |
| RAEAVESAQAGDRC        | 1203.5601 | 601.55 | 2 ##### | 3.89 | 0.47 |
| RAFHNEAQVNPERK        | 1411.6713 | 705.57 | 2 ##### | 2.98 | 0.52 |
| RAFHNEAQVNPERKN       | 1539.7662 | 769.63 | 2 ##### | 3.17 | 0.51 |
| RAFHNEAQVNPERKN       | 1539.7662 | 513.16 | 3 ##### | 3.24 | 0.29 |
| RAFHNEAQVNPERKN       | 1539.7662 | 769.63 | 2 ##### | 3.46 | 0.51 |
| RAFHNEAQVNPERKN       | 1539.7662 | 769.61 | 2 ##### | 3.67 | 0.55 |
| RAFHNEAQVNPERKN       | 1539.7662 | 769.62 | 2 ##### | 3.71 | 0.52 |
| RAFHNEAQVNPERKN       | 1539.7662 | 769.61 | 2 ##### | 4.00 | 0.54 |
| RAFITNIPFDVKW         | 1264.6936 | 632.11 | 2 ##### | 2.73 | 0.47 |
| RAFITNIPFDVKW         | 1264.6936 | 632.15 | 2 ##### | 2.89 | 0.40 |
| RAFITNIPFDVKW         | 1264.6936 | 632.15 | 2 ##### | 3.28 | 0.39 |
| RAFITNIPFDVKW         | 1264.6936 | 632.13 | 2 ##### | 3.59 | 0.44 |
| RAFITNIPFDVKW         | 1264.6936 | 632.13 | 2 ##### | 3.64 | 0.43 |
| RAGELTEDEVERV         | 1247.5750 | 623.56 | 2 ##### | 3.06 | 0.46 |
| RAGELTEDEVERV         | 1247.5750 | 623.56 | 2 ##### | 3.08 | 0.46 |
| RAGELTEDEVERV         | 1247.5750 | 623.56 | 2 ##### | 3.15 | 0.46 |
| RAGELTEDEVERV         | 1247.5750 | 623.60 | 2 ##### | 3.21 | 0.37 |
| RAGELTEDEVERV         | 1247.5750 | 623.59 | 2 ##### | 3.23 | 0.40 |
| RAGELTEDEVERV         | 1247.5750 | 623.56 | 2 ##### | 3.56 | 0.45 |
| RAGELTEDEVERV         | 1247.5750 | 623.53 | 2 ##### | 3.61 | 0.52 |
| RAGTGVDNVDLEAATRK     | 1488.7289 | 744.11 | 2 ##### | 3.51 | 0.51 |
| RAGTGVDNVDLEAATRK     | 1488.7289 | 744.05 | 2 ##### | 3.61 | 0.63 |
| RAGTGVDNVDLEAATRK     | 1488.7289 | 744.08 | 2 ##### | 3.69 | 0.57 |
| RAGTGVDNVDLEAATRK     | 1488.7289 | 744.11 | 2 ##### | 3.69 | 0.50 |
| RAGTGVDNVDLEAATRK     | 1488.7289 | 744.08 | 2 ##### | 3.74 | 0.57 |
| RAGTGVDNVDLEAATRK     | 1488.7289 | 744.09 | 2 ##### | 3.86 | 0.55 |
| RAGTGVDNVDLEAATRK     | 1488.7289 | 744.07 | 2 ##### | 4.22 | 0.58 |
| RAGVNTVTTLVENKK       | 1345.7322 | 672.62 | 2 ##### | 3.38 | 0.48 |
| RAGVNTVTTLVENKK       | 1345.7322 | 672.63 | 2 ##### | 3.40 | 0.47 |
| RAGVNTVTTLVENKK       | 1345.7322 | 672.60 | 2 ##### | 3.86 | 0.53 |
| RAGVNTVTTLVENKK       | 1345.7322 | 672.61 | 2 ##### | 3.92 | 0.51 |
| RAGVNTVTTLVENKK       | 1345.7322 | 672.63 | 2 ##### | 4.00 | 0.47 |
| RAGVNTVTTLVENKK       | 1345.7322 | 672.62 | 2 ##### | 4.02 | 0.49 |
| RAGVNTVTTLVENKK       | 1345.7322 | 672.62 | 2 ##### | 4.03 | 0.49 |
| RAGVNTVTTLVENKK       | 1345.7322 | 672.62 | 2 ##### | 4.04 | 0.50 |
| RAGVNTVTTLVENKK       | 1345.7322 | 672.62 | 2 ##### | 4.06 | 0.49 |
| RAIAELGIYPAVDPLDSTSRI | 1988.0334 | 993.69 | 2 ##### | 3.65 | 0.65 |
| RAIAELGIYPAVDPLDSTSRI | 1988.0334 | 993.71 | 2 ##### | 4.06 | 0.62 |
| RAIAELGIYPAVDPLDSTSRI | 1988.0334 | 993.68 | 2 ##### | 4.35 | 0.67 |
| RAIEINPDSAQPYKW       | 1445.7271 | 722.79 | 2 ##### | 2.67 | 0.14 |
| RAIEINPDSAQPYKW       | 1445.7271 | 722.72 | 2 ##### | 2.69 | 0.28 |
| RAIEINPDSAQPYKW       | 1445.7271 | 722.77 | 2 ##### | 2.85 | 0.19 |
| RAIEINPDSAQPYKW       | 1445.7271 | 722.76 | 2 ##### | 2.95 | 0.20 |
| RAIEINPDSAQPYKW       | 1445.7271 | 722.80 | 2 ##### | 2.96 | 0.13 |
| RAIGNIVTGTDEQTQKV     | 1574.8020 | 787.15 | 2 ##### | 3.41 | 0.50 |
| RAIGNIVTGTDEQTQKV     | 1574.8020 | 787.18 | 2 ##### | 3.61 | 0.45 |

|                     |           |        |         |      |      |
|---------------------|-----------|--------|---------|------|------|
| RAIGNIVTGTDEQTQKV   | 1574.8020 | 787.15 | 2 ##### | 3.84 | 0.51 |
| RAIVAIENPADVSVISSRN | 1740.9491 | 870.23 | 2 ##### | 3.16 | 0.49 |
| RAIVAIENPADVSVISSRN | 1740.9491 | 870.21 | 2 ##### | 3.36 | 0.52 |
| RAIVAIENPADVSVISSRN | 1740.9491 | 870.26 | 2 ##### | 3.91 | 0.42 |
| RAIVAIENPADVSVISSRN | 1740.9491 | 870.23 | 2 ##### | 3.94 | 0.48 |
| RAIVAIENPADVSVISSRN | 1740.9491 | 870.16 | 2 ##### | 3.98 | 0.62 |
| RAIVAIENPADVSVISSRN | 1740.9491 | 870.16 | 2 ##### | 4.14 | 0.64 |
| RAIVAIENPADVSVISSRN | 1740.9491 | 870.14 | 2 ##### | 4.48 | 0.68 |
| RAIVAIENPADVSVISSRN | 1740.9491 | 870.19 | 2 ##### | 4.87 | 0.57 |
| RAIVAIENPADVSVISSRN | 1740.9491 | 870.21 | 2 ##### | 4.95 | 0.53 |
| RAIVAIENPADVSVISSRN | 1740.9491 | 870.16 | 2 ##### | 5.42 | 0.63 |
| RAKEAAEQDVEKK       | 1217.6008 | 608.56 | 2 ##### | 3.12 | 0.48 |
| RAKFEELNMDLFRS      | 1528.7509 | 509.43 | 3 ##### | 3.29 | 0.46 |
| RAKFEELNMDLFRS      | 1528.7509 | 764.15 | 2 ##### | 3.43 | 0.45 |
| RAKFEELNMDLFRS      | 1528.7509 | 764.13 | 2 ##### | 3.50 | 0.49 |
| RAKFEELNMDLFRS      | 1528.7509 | 764.12 | 2 ##### | 3.52 | 0.51 |
| RAKFEELNMDLFRS      | 1528.7509 | 764.20 | 2 ##### | 3.52 | 0.35 |
| RAKFEELNMDLFRS      | 1528.7509 | 764.15 | 2 ##### | 3.82 | 0.46 |
| RALADDDFLTVTGKT     | 1365.6897 | 682.58 | 2 ##### | 3.08 | 0.53 |
| RALADDDFLTVTGKT     | 1365.6897 | 682.57 | 2 ##### | 3.08 | 0.54 |
| RALADDDFLTVTGKT     | 1365.6897 | 682.59 | 2 ##### | 3.24 | 0.52 |
| RALADDDFLTVTGKT     | 1365.6897 | 682.62 | 2 ##### | 3.28 | 0.45 |
| RALADDDFLTVTGKT     | 1365.6897 | 682.60 | 2 ##### | 3.35 | 0.49 |
| RALADDDFLTVTGKT     | 1365.6897 | 682.59 | 2 ##### | 3.37 | 0.50 |
| RALADDDFLTVTGKT     | 1365.6897 | 682.57 | 2 ##### | 3.37 | 0.56 |
| RALADDDFLTVTGKT     | 1365.6897 | 682.59 | 2 ##### | 3.48 | 0.52 |
| RALEESNYELEGKI      | 1381.6482 | 690.63 | 2 ##### | 3.04 | 0.38 |
| RALEESNYELEGKI      | 1381.6482 | 690.63 | 2 ##### | 3.10 | 0.38 |
| RALEESNYELEGKI      | 1381.6482 | 690.59 | 2 ##### | 3.52 | 0.47 |
| RALEESNYELEGKI      | 1381.6482 | 690.60 | 2 ##### | 3.69 | 0.45 |
| RALEESNYELEGKI      | 1381.6482 | 690.60 | 2 ##### | 3.75 | 0.44 |
| RALTQTGGPHVKA       | 1108.6110 | 554.16 | 2 ##### | 2.71 | 0.29 |
| RALTQTGGPHVKA       | 1108.6110 | 554.10 | 2 ##### | 2.83 | 0.42 |
| RALTVPELTQQVFDAKN   | 1659.8953 | 829.65 | 2 ##### | 2.68 | 0.59 |
| RALTVPELTQQVFDAKN   | 1659.8953 | 829.70 | 2 ##### | 2.74 | 0.49 |
| RALTVPELTQQVFDAKN   | 1659.8953 | 829.75 | 2 ##### | 2.79 | 0.39 |
| RALTVPELTQQVFDAKN   | 1659.8953 | 829.72 | 2 ##### | 2.79 | 0.45 |
| RALTVPELTQQVFDAKN   | 1659.8953 | 829.69 | 2 ##### | 2.85 | 0.52 |
| RALTVPELTQQVFDAKN   | 1659.8953 | 829.71 | 2 ##### | 2.90 | 0.47 |
| RALTVPELTQQVFDAKN   | 1659.8953 | 829.77 | 2 ##### | 3.03 | 0.36 |
| RALTVPELTQQVFDAKN   | 1659.8953 | 829.71 | 2 ##### | 3.04 | 0.47 |
| RALTVPELTQQVFDAKN   | 1659.8953 | 829.72 | 2 ##### | 3.05 | 0.45 |
| RALTVPELTQQVFDAKN   | 1659.8953 | 829.62 | 2 ##### | 3.05 | 0.65 |
| RALTVPELTQQVFDAKN   | 1659.8953 | 829.69 | 2 ##### | 3.06 | 0.52 |
| RALTVPELTQQVFDAKN   | 1659.8953 | 829.67 | 2 ##### | 3.11 | 0.56 |
| RALTVPELTQQVFDAKN   | 1659.8953 | 829.72 | 2 ##### | 3.19 | 0.46 |
| RALTVPELTQQVFDAKN   | 1659.8953 | 829.61 | 2 ##### | 3.20 | 0.68 |
| RALTVPELTQQVFDAKN   | 1659.8953 | 829.72 | 2 ##### | 3.24 | 0.45 |
| RALTVPELTQQVFDAKN   | 1659.8953 | 829.65 | 2 ##### | 3.26 | 0.60 |
| RALTVPELTQQVFDAKN   | 1659.8953 | 829.72 | 2 ##### | 3.28 | 0.46 |
| RALTVPELTQQVFDAKN   | 1659.8953 | 829.68 | 2 ##### | 3.30 | 0.54 |
| RALTVPELTQQVFDAKN   | 1659.8953 | 829.66 | 2 ##### | 3.32 | 0.58 |
| RALTVPELTQQVFDAKN   | 1659.8953 | 829.67 | 2 ##### | 3.32 | 0.56 |
| RALTVPELTQQVFDAKN   | 1659.8953 | 829.69 | 2 ##### | 3.44 | 0.52 |
| RALTVPELTQQVFDAKN   | 1659.8953 | 829.71 | 2 ##### | 3.47 | 0.48 |
| RALTVPELTQQVFDAKN   | 1659.8953 | 829.69 | 2 ##### | 3.53 | 0.51 |

|                         |           |        |         |      |      |
|-------------------------|-----------|--------|---------|------|------|
| RALTVPELTQQVFDANK       | 1659.8953 | 829.65 | 2 ##### | 3.60 | 0.59 |
| RALTVPELTQQVFDANK       | 1659.8953 | 829.69 | 2 ##### | 3.64 | 0.51 |
| RALTVPELTQQVFDANK       | 1659.8953 | 829.66 | 2 ##### | 3.67 | 0.57 |
| RALTVPELTQQVFDANK       | 1659.8953 | 829.66 | 2 ##### | 3.80 | 0.57 |
| RALTVPELTQQVFDANK       | 1659.8953 | 829.67 | 2 ##### | 3.89 | 0.56 |
| RALTVPELTQQVFDANK       | 1659.8953 | 553.10 | 3 ##### | 4.72 | 0.60 |
| RANLPQSFQVDTSKA         | 1434.7223 | 717.07 | 2 ##### | 2.79 | 0.58 |
| RAQEQLATALQNLEEAKEA     | 1885.9502 | 942.74 | 2 ##### | 3.43 | 0.47 |
| RAQEQLATALQNLEEAKEA     | 1885.9502 | 942.67 | 2 ##### | 4.84 | 0.60 |
| RARFEELNADLFRG          | 1480.7543 | 740.19 | 2 ##### | 2.69 | 0.38 |
| RARFEELNADLFRG          | 1480.7543 | 740.19 | 2 ##### | 2.88 | 0.38 |
| RARFEELNADLFRG          | 1480.7543 | 740.16 | 2 ##### | 3.10 | 0.44 |
| RARFEELNADLFRG          | 1480.7543 | 740.16 | 2 ##### | 3.10 | 0.43 |
| RARFEELNADLFRG          | 1480.7543 | 740.13 | 2 ##### | 3.16 | 0.49 |
| RARFEELNADLFRG          | 1480.7543 | 740.15 | 2 ##### | 3.31 | 0.46 |
| RARFEELNADLFRG          | 1480.7543 | 740.13 | 2 ##### | 3.32 | 0.49 |
| RARFEELNADLFRG          | 1480.7543 | 740.14 | 2 ##### | 3.34 | 0.48 |
| RARFEELNADLFRG          | 1480.7543 | 740.11 | 2 ##### | 3.46 | 0.53 |
| RARFEELNADLFRG          | 1480.7543 | 740.11 | 2 ##### | 3.78 | 0.54 |
| RARFEELNADLFRG          | 1480.7543 | 493.47 | 3 ##### | 3.83 | 0.35 |
| RATAGAYIASQTVKK         | 1280.6844 | 640.13 | 2 ##### | 4.05 | 0.42 |
| RATENDIYNFFSPLNPVRV     | 1996.9763 | 998.23 | 2 ##### | 4.71 | 0.51 |
| RATTLSSNAVSSLASTGLSLTKV | 1922.0441 | 960.77 | 2 ##### | 3.08 | 0.51 |
| RAVAVVVDPIQSVKG         | 1324.7834 | 662.18 | 2 ##### | 2.61 | 0.42 |
| RAVAVVVDPIQSVKG         | 1324.7834 | 662.16 | 2 ##### | 3.14 | 0.47 |
| RAVAVVVDPIQSVKG         | 1324.7834 | 662.18 | 2 ##### | 3.36 | 0.42 |
| RAVAVVVDPIQSVKG         | 1324.7834 | 662.20 | 2 ##### | 3.38 | 0.38 |
| RAVAVVVDPIQSVKG         | 1324.7834 | 662.23 | 2 ##### | 3.52 | 0.32 |
| RAVAVVVDPIQSVKG         | 1324.7834 | 662.19 | 2 ##### | 3.93 | 0.41 |
| RAVAVVVDPIQSVKG         | 1324.7834 | 662.17 | 2 ##### | 3.97 | 0.44 |
| RAVFPSIVGRPRH           | 1198.7054 | 599.17 | 2 ##### | 3.09 | 0.36 |
| RAVFDLEPTVIDEVRT        | 1701.9058 | 850.77 | 2 ##### | 3.49 | 0.37 |
| RAVFDLEPTVIDEVRT        | 1701.9058 | 850.68 | 2 ##### | 3.93 | 0.54 |
| RAVFDLEPTVIDEVRT        | 1701.9058 | 850.68 | 2 ##### | 4.17 | 0.54 |
| RAVFDLEPTVIDEVRT        | 1701.9058 | 850.67 | 2 ##### | 4.26 | 0.56 |
| RAVFDLEPTVIDEVRT        | 1701.9058 | 850.67 | 2 ##### | 4.29 | 0.58 |
| RAVFDLEPTVIDEVRT        | 1701.9058 | 850.73 | 2 ##### | 4.60 | 0.45 |
| RAVFDLEPTVIDEVRT        | 1701.9058 | 850.71 | 2 ##### | 4.66 | 0.49 |
| RAVFDLEPTVIDEVRT        | 1701.9058 | 850.68 | 2 ##### | 4.95 | 0.55 |
| RAVFDLEPTVIDEVRT        | 1701.9058 | 850.68 | 2 ##### | 5.13 | 0.55 |
| RCLCIQEHSEFIPLKLIKN     | 2014.0864 | 671.25 | 3 ##### | 3.37 | 0.33 |
| RCWEVIDAQAEMALRS        | 1634.7665 | 817.33 | 2 ##### | 2.73 | 0.11 |
| RCWEVIDAQAEMALRS        | 1634.7665 | 817.33 | 2 ##### | 2.94 | 0.11 |
| RCWEVIDAQAEMALRS        | 1634.7665 | 817.29 | 2 ##### | 3.01 | 0.19 |
| RDADDAVYELNSKE          | 1339.6012 | 669.59 | 2 ##### | 3.07 | 0.43 |
| RDADDAVYELNSKE          | 1339.6012 | 669.58 | 2 ##### | 3.78 | 0.45 |
| RDALNIETAVKT            | 1073.5837 | 536.60 | 2 ##### | 2.71 | 0.38 |
| RDALNIETAVKT            | 1073.5837 | 536.60 | 2 ##### | 3.09 | 0.39 |
| RDALNIETAVKT            | 1073.5837 | 536.60 | 2 ##### | 3.37 | 0.38 |
| RDALSDLALHFLNKM         | 1456.7794 | 728.12 | 2 ##### | 4.48 | 0.54 |
| RDAVTYTEHAKR            | 1134.5426 | 567.05 | 2 ##### | 2.53 | 0.44 |
| RDAVTYTEHAKR            | 1134.5426 | 567.04 | 2 ##### | 2.55 | 0.47 |
| RDAVTYTEHAKR            | 1134.5426 | 567.10 | 2 ##### | 2.59 | 0.34 |
| RDAVTYTEHAKR            | 1134.5426 | 567.08 | 2 ##### | 2.60 | 0.39 |
| RDAVTYTEHAKR            | 1134.5426 | 567.07 | 2 ##### | 2.60 | 0.41 |
| RDAVTYTEHAKR            | 1134.5426 | 567.10 | 2 ##### | 2.61 | 0.34 |

|                        |           |        |         |      |      |
|------------------------|-----------|--------|---------|------|------|
| RDAVTYTEHAKR           | 1134.5426 | 567.07 | 2 ##### | 2.65 | 0.39 |
| RDAVTYTEHAKR           | 1134.5426 | 567.03 | 2 ##### | 2.65 | 0.48 |
| RDAVTYTEHAKR           | 1134.5426 | 567.02 | 2 ##### | 2.68 | 0.50 |
| RDAVTYTEHAKR           | 1134.5426 | 567.04 | 2 ##### | 2.69 | 0.47 |
| RDAVTYTEHAKR           | 1134.5426 | 567.09 | 2 ##### | 2.70 | 0.36 |
| RDAVTYTEHAKR           | 1134.5426 | 567.03 | 2 ##### | 2.88 | 0.48 |
| RDAVTYTEHAKR           | 1134.5426 | 567.03 | 2 ##### | 2.93 | 0.48 |
| RDAVTYTEHAKR           | 1134.5426 | 567.04 | 2 ##### | 2.95 | 0.45 |
| RDAVTYTEHAKR           | 1134.5426 | 567.03 | 2 ##### | 2.97 | 0.49 |
| RDAVTYTEHAKR           | 1134.5426 | 567.04 | 2 ##### | 3.00 | 0.46 |
| RDETNYGIPQRA           | 1192.5593 | 596.08 | 2 ##### | 2.51 | 0.40 |
| RDETNYGIPQRA           | 1192.5593 | 596.09 | 2 ##### | 2.66 | 0.38 |
| RDETNYGIPQRA           | 1192.5593 | 596.07 | 2 ##### | 3.24 | 0.42 |
| RDETNYGIPQRA           | 1192.5593 | 596.08 | 2 ##### | 3.28 | 0.41 |
| RDGEEAGAYDGPRT         | 1236.5127 | 617.98 | 2 ##### | 3.23 | 0.55 |
| RDGEEAGAYDGPRT         | 1236.5127 | 618.02 | 2 ##### | 3.37 | 0.47 |
| RDGEEAGAYDGPRT         | 1236.5127 | 617.97 | 2 ##### | 3.48 | 0.57 |
| RDGEEAGAYDGPRT         | 1236.5127 | 617.98 | 2 ##### | 3.64 | 0.56 |
| RDGEEAGAYDGPRT         | 1236.5127 | 617.94 | 2 ##### | 3.66 | 0.63 |
| RDGEEAGAYDGPRT         | 1236.5127 | 617.95 | 2 ##### | 3.83 | 0.61 |
| RDGTGVVEFVRK           | 1078.5527 | 539.12 | 2 ##### | 2.57 | 0.32 |
| RDIGEGNLSTAAAAALAAAVKA | 1885.0026 | 942.29 | 2 ##### | 4.15 | 0.43 |
| RDIGEGNLSTAAAAALAAAVKA | 1885.0026 | 942.22 | 2 ##### | 5.02 | 0.56 |
| RDIGEGNLSTAAAAALAAAVKA | 1885.0026 | 942.22 | 2 ##### | 5.75 | 0.57 |
| RDIQENDEEAVQVKE        | 1516.7125 | 758.24 | 2 ##### | 2.78 | 0.23 |
| RDIQENDEEAVQVKE        | 1516.7125 | 758.19 | 2 ##### | 2.87 | 0.33 |
| RDIQENDEEAVQVKE        | 1516.7125 | 758.19 | 2 ##### | 3.17 | 0.32 |
| RDIQENDEEAVQVKE        | 1516.7125 | 758.20 | 2 ##### | 3.21 | 0.31 |
| RDKLNNLVLFDKA          | 1318.7366 | 659.17 | 2 ##### | 3.00 | 0.40 |
| RDKLNNLVLFDKA          | 1318.7366 | 659.18 | 2 ##### | 3.02 | 0.38 |
| RDKLNNLVLFDKA          | 1318.7366 | 659.24 | 2 ##### | 3.05 | 0.26 |
| RDKLNNLVLFDKA          | 1318.7366 | 659.19 | 2 ##### | 3.15 | 0.35 |
| RDKLNNLVLFDKA          | 1318.7366 | 659.15 | 2 ##### | 3.20 | 0.44 |
| RDKLNNLVLFDKA          | 1318.7366 | 659.17 | 2 ##### | 3.32 | 0.40 |
| RDKLNNLVLFDKA          | 1318.7366 | 659.16 | 2 ##### | 3.33 | 0.43 |
| RDLFSDGHSEFLKA         | 1394.6587 | 697.11 | 2 ##### | 3.35 | 0.43 |
| RDLFSDGHSEFLKA         | 1394.6587 | 697.08 | 2 ##### | 3.38 | 0.49 |
| RDLFSDGHSEFLKA         | 1394.6587 | 697.08 | 2 ##### | 3.39 | 0.49 |
| RDLFSDGHSEFLKA         | 1394.6587 | 697.13 | 2 ##### | 3.44 | 0.39 |
| RDLSSVQTLTQK           | 1204.6783 | 602.11 | 2 ##### | 3.02 | 0.45 |
| RDNIQGITKPAIRR         | 1325.7535 | 662.69 | 2 ##### | 2.51 | 0.38 |
| RDNIQGITKPAIRR         | 1325.7535 | 662.76 | 2 ##### | 2.51 | 0.23 |
| RDNIQGITKPAIRR         | 1325.7535 | 662.69 | 2 ##### | 2.52 | 0.38 |
| RDNIQGITKPAIRR         | 1325.7535 | 662.70 | 2 ##### | 2.52 | 0.36 |
| RDNIQGITKPAIRR         | 1325.7535 | 662.70 | 2 ##### | 2.53 | 0.35 |
| RDNIQGITKPAIRR         | 1325.7535 | 662.69 | 2 ##### | 2.54 | 0.37 |
| RDNIQGITKPAIRR         | 1325.7535 | 662.73 | 2 ##### | 2.55 | 0.29 |
| RDNIQGITKPAIRR         | 1325.7535 | 662.72 | 2 ##### | 2.56 | 0.31 |
| RDNIQGITKPAIRR         | 1325.7535 | 662.74 | 2 ##### | 2.57 | 0.27 |
| RDNIQGITKPAIRR         | 1325.7535 | 662.69 | 2 ##### | 2.58 | 0.38 |
| RDNIQGITKPAIRR         | 1325.7535 | 662.71 | 2 ##### | 2.58 | 0.34 |
| RDNIQGITKPAIRR         | 1325.7535 | 662.81 | 2 ##### | 2.60 | 0.14 |
| RDNIQGITKPAIRR         | 1325.7535 | 662.72 | 2 ##### | 2.61 | 0.32 |
| RDNIQGITKPAIRR         | 1325.7535 | 662.74 | 2 ##### | 2.62 | 0.27 |
| RDNIQGITKPAIRR         | 1325.7535 | 662.71 | 2 ##### | 2.62 | 0.34 |
| RDNIQGITKPAIRR         | 1325.7535 | 662.74 | 2 ##### | 2.63 | 0.27 |

|                 |           |        |         |      |      |
|-----------------|-----------|--------|---------|------|------|
| RDNIQGITKPAIRR  | 1325.7535 | 662.73 | 2 ##### | 2.64 | 0.29 |
| RDNIQGITKPAIRR  | 1325.7535 | 662.75 | 2 ##### | 2.64 | 0.26 |
| RDNIQGITKPAIRR  | 1325.7535 | 662.70 | 2 ##### | 2.64 | 0.35 |
| RDNIQGITKPAIRR  | 1325.7535 | 662.71 | 2 ##### | 2.65 | 0.33 |
| RDNIQGITKPAIRR  | 1325.7535 | 662.71 | 2 ##### | 2.66 | 0.34 |
| RDNIQGITKPAIRR  | 1325.7535 | 662.77 | 2 ##### | 2.66 | 0.21 |
| RDNIQGITKPAIRR  | 1325.7535 | 662.70 | 2 ##### | 2.68 | 0.35 |
| RDNIQGITKPAIRR  | 1325.7535 | 662.77 | 2 ##### | 2.68 | 0.22 |
| RDNIQGITKPAIRR  | 1325.7535 | 662.70 | 2 ##### | 2.68 | 0.35 |
| RDNIQGITKPAIRR  | 1325.7535 | 662.67 | 2 ##### | 2.69 | 0.40 |
| RDNIQGITKPAIRR  | 1325.7535 | 662.71 | 2 ##### | 2.69 | 0.32 |
| RDNIQGITKPAIRR  | 1325.7535 | 662.76 | 2 ##### | 2.70 | 0.23 |
| RDNIQGITKPAIRR  | 1325.7535 | 662.71 | 2 ##### | 2.71 | 0.33 |
| RDNIQGITKPAIRR  | 1325.7535 | 662.80 | 2 ##### | 2.73 | 0.15 |
| RDNIQGITKPAIRR  | 1325.7535 | 662.76 | 2 ##### | 2.73 | 0.23 |
| RDNIQGITKPAIRR  | 1325.7535 | 662.70 | 2 ##### | 2.74 | 0.35 |
| RDNIQGITKPAIRR  | 1325.7535 | 662.83 | 2 ##### | 2.74 | 0.10 |
| RDNIQGITKPAIRR  | 1325.7535 | 662.75 | 2 ##### | 2.74 | 0.25 |
| RDNIQGITKPAIRR  | 1325.7535 | 662.70 | 2 ##### | 2.74 | 0.36 |
| RDNIQGITKPAIRR  | 1325.7535 | 662.74 | 2 ##### | 2.75 | 0.28 |
| RDNIQGITKPAIRR  | 1325.7535 | 662.72 | 2 ##### | 2.76 | 0.31 |
| RDNIQGITKPAIRR  | 1325.7535 | 662.73 | 2 ##### | 2.80 | 0.29 |
| RDNIQGITKPAIRR  | 1325.7535 | 662.72 | 2 ##### | 2.81 | 0.30 |
| RDNIQGITKPAIRR  | 1325.7535 | 662.70 | 2 ##### | 2.81 | 0.36 |
| RDNIQGITKPAIRR  | 1325.7535 | 662.76 | 2 ##### | 2.83 | 0.24 |
| RDNIQGITKPAIRR  | 1325.7535 | 662.70 | 2 ##### | 2.87 | 0.35 |
| RDNIQGITKPAIRR  | 1325.7535 | 662.69 | 2 ##### | 2.88 | 0.36 |
| RDNIQGITKPAIRR  | 1325.7535 | 662.72 | 2 ##### | 2.90 | 0.32 |
| RDNIQGITKPAIRR  | 1325.7535 | 662.73 | 2 ##### | 2.93 | 0.30 |
| RDNIQGITKPAIRR  | 1325.7535 | 662.71 | 2 ##### | 2.93 | 0.34 |
| RDNIQGITKPAIRR  | 1325.7535 | 662.71 | 2 ##### | 2.96 | 0.33 |
| RDNIQGITKPAIRR  | 1325.7535 | 662.73 | 2 ##### | 3.01 | 0.30 |
| RDNIQGITKPAIRR  | 1325.7535 | 662.69 | 2 ##### | 3.10 | 0.36 |
| RDNIQGITKPAIRR  | 1325.7535 | 662.66 | 2 ##### | 3.14 | 0.43 |
| RDNIQGITKPAIRR  | 1325.7535 | 662.75 | 2 ##### | 3.16 | 0.26 |
| RDNIQGITKPAIRR  | 1325.7535 | 662.74 | 2 ##### | 3.21 | 0.28 |
| RDNIQGITKPAIRR  | 1325.7535 | 662.71 | 2 ##### | 3.32 | 0.34 |
| RDNIQGITKPAIRR  | 1325.7535 | 662.69 | 2 ##### | 3.34 | 0.37 |
| RDNIQGITKPAIRR  | 1325.7535 | 662.66 | 2 ##### | 3.34 | 0.42 |
| RDNIQGITKPAIRR  | 1325.7535 | 662.70 | 2 ##### | 3.54 | 0.36 |
| RDNIQGITKPAIRR  | 1325.7535 | 662.66 | 2 ##### | 3.57 | 0.43 |
| RDNIQGITKPAIRR  | 1325.7535 | 662.69 | 2 ##### | 3.59 | 0.38 |
| RDPENFPFVVLGNKI | 1475.7529 | 737.59 | 2 ##### | 3.28 | 0.58 |
| RDPENFPFVVLGNKI | 1475.7529 | 737.63 | 2 ##### | 3.55 | 0.50 |
| RDPENFPFVVLGNKI | 1475.7529 | 737.66 | 2 ##### | 3.77 | 0.44 |
| RDPENFPFVVLGNKI | 1475.7529 | 737.65 | 2 ##### | 3.82 | 0.46 |
| RDQTPDENDQVIVKI | 1500.7177 | 750.26 | 2 ##### | 2.50 | 0.19 |
| RDQTPDENDQVIVKI | 1500.7177 | 750.24 | 2 ##### | 2.80 | 0.25 |
| RDQTPDENDQVIVKI | 1500.7177 | 750.23 | 2 ##### | 2.88 | 0.25 |
| RDQTPDENDQVIVKI | 1500.7177 | 750.22 | 2 ##### | 2.89 | 0.27 |
| RDQTPDENDQVIVKI | 1500.7177 | 750.18 | 2 ##### | 2.96 | 0.35 |
| RDQTPDENEEVIVRI | 1543.7235 | 771.73 | 2 ##### | 2.77 | 0.27 |
| RDQTPDENEEVIVRI | 1543.7235 | 771.61 | 2 ##### | 3.33 | 0.51 |
| RDQTPDENEEVIVRI | 1543.7235 | 771.68 | 2 ##### | 3.33 | 0.37 |
| RDQTPDENEEVIVRI | 1543.7235 | 771.63 | 2 ##### | 3.70 | 0.47 |
| RDQTPDENEEVIVRI | 1543.7235 | 771.63 | 2 ##### | 3.76 | 0.47 |

|                    |           |        |         |      |      |
|--------------------|-----------|--------|---------|------|------|
| RDVDEVSSLLRT       | 1132.5845 | 566.11 | 2 ##### | 3.10 | 0.37 |
| RDVDEVSSLLRT       | 1132.5845 | 566.11 | 2 ##### | 3.40 | 0.36 |
| RDVDEVSSLLRT       | 1132.5845 | 566.10 | 2 ##### | 3.51 | 0.39 |
| RDVDEVSSLLRT       | 1132.5845 | 566.12 | 2 ##### | 3.58 | 0.35 |
| RDVDEVSSLLRT       | 1132.5845 | 566.12 | 2 ##### | 3.59 | 0.34 |
| RDVDEVSSLLRT       | 1132.5845 | 566.12 | 2 ##### | 3.67 | 0.35 |
| RDVDEVSSLLRT       | 1132.5845 | 566.12 | 2 ##### | 3.72 | 0.34 |
| RDVDFELIKVEGKV     | 1391.7417 | 695.63 | 2 ##### | 2.70 | 0.48 |
| RDVIAQSQSGTGKT     | 1190.6012 | 595.16 | 2 ##### | 2.55 | 0.27 |
| RDVIAQSQSGTGKT     | 1190.6012 | 595.11 | 2 ##### | 2.87 | 0.38 |
| RDVIAQSQSGTGKT     | 1190.6012 | 595.05 | 2 ##### | 3.03 | 0.51 |
| RDVIAQSQSGTGKT     | 1190.6012 | 595.01 | 2 ##### | 3.31 | 0.58 |
| RDVIAQSQSGTGKT     | 1190.6012 | 595.03 | 2 ##### | 3.97 | 0.55 |
| RDVIAQSQSGTGKT     | 1190.6012 | 595.05 | 2 ##### | 3.98 | 0.50 |
| RDVVLAYPEVRI       | 1160.6310 | 580.15 | 2 ##### | 2.89 | 0.33 |
| RDYETATLSDIKA      | 1255.6052 | 627.62 | 2 ##### | 2.98 | 0.36 |
| RDYETATLSDIKA      | 1255.6052 | 627.64 | 2 ##### | 3.16 | 0.32 |
| RDYETATLSDIKA      | 1255.6052 | 627.60 | 2 ##### | 3.18 | 0.41 |
| REAGAGGLAIAVEGPSKA | 1426.7537 | 713.24 | 2 ##### | 2.55 | 0.27 |
| REAGAGGLAIAVEGPSKA | 1426.7537 | 713.10 | 2 ##### | 3.54 | 0.56 |
| REAGAGGLAIAVEGPSKA | 1426.7537 | 713.12 | 2 ##### | 3.72 | 0.52 |
| REATNPPIIQEEKPKK   | 1593.8483 | 796.73 | 2 ##### | 2.53 | 0.39 |
| REATNPPIIQEEKPKK   | 1593.8483 | 796.74 | 2 ##### | 2.74 | 0.36 |
| REATNPPIIQEEKPKK   | 1593.8483 | 796.68 | 2 ##### | 3.12 | 0.48 |
| REDSQRPGAHLTVKK    | 1437.7445 | 718.71 | 2 ##### | 2.67 | 0.32 |
| REDSQRPGAHLTVKK    | 1437.7445 | 718.71 | 2 ##### | 2.75 | 0.33 |
| REDSQRPGAHLTVKK    | 1437.7445 | 718.68 | 2 ##### | 2.85 | 0.39 |
| REDSVKPGAHLTVKK    | 1380.7482 | 690.21 | 2 ##### | 2.88 | 0.33 |
| REDSVKPGAHLTVKK    | 1380.7482 | 690.09 | 2 ##### | 3.31 | 0.58 |
| REEAESTLQSFQR      | 1296.6067 | 648.11 | 2 ##### | 2.57 | 0.39 |
| REEAESTLQSFQR      | 1296.6067 | 648.04 | 2 ##### | 2.76 | 0.53 |
| REFVAVTGTEEDRA     | 1352.6328 | 676.15 | 2 ##### | 3.51 | 0.34 |
| REGDVLTLLESERE     | 1360.6954 | 680.13 | 2 ##### | 2.53 | 0.43 |
| REGDVLTLLESERE     | 1360.6954 | 680.14 | 2 ##### | 2.74 | 0.41 |
| REGDVLTLLESERE     | 1360.6954 | 680.23 | 2 ##### | 2.75 | 0.24 |
| REGDVLTLLESERE     | 1360.6954 | 680.22 | 2 ##### | 2.83 | 0.25 |
| REGDVLTLLESERE     | 1360.6954 | 680.14 | 2 ##### | 2.84 | 0.42 |
| REGDVLTLLESERE     | 1360.6954 | 680.21 | 2 ##### | 2.88 | 0.28 |
| REGDVLTLLESERE     | 1360.6954 | 680.18 | 2 ##### | 2.94 | 0.33 |
| REGDVLTLLESERE     | 1360.6954 | 680.13 | 2 ##### | 2.97 | 0.44 |
| REGDVLTLLESERE     | 1360.6954 | 680.07 | 2 ##### | 3.00 | 0.56 |
| REGDVLTLLESERE     | 1360.6954 | 680.15 | 2 ##### | 3.12 | 0.40 |
| REGDVLTLLESERE     | 1360.6954 | 680.17 | 2 ##### | 3.12 | 0.36 |
| REGDVLTLLESERE     | 1360.6954 | 680.13 | 2 ##### | 3.16 | 0.44 |
| REGDVLTLLESERE     | 1360.6954 | 680.14 | 2 ##### | 3.27 | 0.42 |
| REGDVLTLLESERE     | 1360.6954 | 680.19 | 2 ##### | 3.33 | 0.31 |
| REGDVLTLLESERE     | 1360.6954 | 680.15 | 2 ##### | 3.34 | 0.40 |
| REGDVLTLLESERE     | 1360.6954 | 680.15 | 2 ##### | 3.42 | 0.39 |
| REGDVLTLLESERE     | 1360.6954 | 680.11 | 2 ##### | 3.44 | 0.48 |
| REGDVLTLLESERE     | 1360.6954 | 680.14 | 2 ##### | 3.58 | 0.42 |
| REGDVLTLLESERE     | 1360.6954 | 680.14 | 2 ##### | 3.59 | 0.42 |
| REGDVLTLLESERE     | 1360.6954 | 680.09 | 2 ##### | 3.61 | 0.52 |
| REGDVLTLLESERE     | 1360.6954 | 680.10 | 2 ##### | 3.74 | 0.50 |
| REGDVLTLLESERE     | 1360.6954 | 680.11 | 2 ##### | 3.77 | 0.48 |
| REGDVLTLLESERE     | 1360.6954 | 680.14 | 2 ##### | 3.94 | 0.41 |
| REGDVLTLLESERE     | 1360.6954 | 680.15 | 2 ##### | 4.03 | 0.40 |

|                  |           |        |         |      |      |
|------------------|-----------|--------|---------|------|------|
| REHALLAYTLGVKQ   | 1314.7416 | 657.25 | 2 ##### | 2.88 | 0.25 |
| REHALLAYTLGVKQ   | 1314.7416 | 657.16 | 2 ##### | 2.98 | 0.41 |
| REHALLAYTLGVKQ   | 1314.7416 | 657.15 | 2 ##### | 3.04 | 0.44 |
| REHALLAYTLGVKQ   | 1314.7416 | 657.16 | 2 ##### | 3.13 | 0.42 |
| REHALLAYTLGVKQ   | 1314.7416 | 657.14 | 2 ##### | 3.16 | 0.46 |
| REKAEGDAAALNRR   | 1244.6229 | 622.19 | 2 ##### | 2.52 | 0.25 |
| REKAEGDAAALNRR   | 1244.6229 | 622.11 | 2 ##### | 2.90 | 0.41 |
| REKAEGDAAALNRR   | 1244.6229 | 622.20 | 2 ##### | 2.91 | 0.23 |
| RELAEDGYSGVEVRV  | 1423.6699 | 711.58 | 2 ##### | 3.62 | 0.51 |
| RELAEDGYSGVEVRV  | 1423.6699 | 711.59 | 2 ##### | 3.70 | 0.49 |
| RELAEDGYSGVEVRV  | 1423.6699 | 711.60 | 2 ##### | 3.81 | 0.47 |
| RELAEDGYSGVEVRV  | 1423.6699 | 711.58 | 2 ##### | 3.98 | 0.52 |
| RELAEDGYSGVEVRV  | 1423.6699 | 711.55 | 2 ##### | 4.00 | 0.58 |
| RELAEDGYSGVEVRV  | 1423.6699 | 711.59 | 2 ##### | 4.33 | 0.49 |
| RELDLPEELVSRH    | 1299.6791 | 649.68 | 2 ##### | 2.68 | 0.32 |
| RELDLPEELVSRH    | 1299.6791 | 649.62 | 2 ##### | 2.80 | 0.44 |
| RELDLPEELVSRH    | 1299.6791 | 649.65 | 2 ##### | 2.84 | 0.39 |
| RELDLPEELVSRH    | 1299.6791 | 649.65 | 2 ##### | 2.88 | 0.38 |
| RELDLPEELVSRH    | 1299.6791 | 649.67 | 2 ##### | 3.30 | 0.34 |
| RELISNASDALDKI   | 1275.6427 | 637.65 | 2 ##### | 2.55 | 0.34 |
| RELISNASDALDKI   | 1275.6427 | 637.57 | 2 ##### | 2.56 | 0.50 |
| RELISNASDALDKI   | 1275.6427 | 637.65 | 2 ##### | 2.60 | 0.35 |
| RELISNASDALDKI   | 1275.6427 | 637.68 | 2 ##### | 2.62 | 0.29 |
| RELISNASDALDKI   | 1275.6427 | 637.61 | 2 ##### | 2.75 | 0.43 |
| RELISNASDALDKI   | 1275.6427 | 637.60 | 2 ##### | 2.79 | 0.45 |
| RELISNASDALDKI   | 1275.6427 | 637.57 | 2 ##### | 2.79 | 0.50 |
| RELISNASDALDKI   | 1275.6427 | 637.64 | 2 ##### | 2.79 | 0.36 |
| RELISNASDALDKI   | 1275.6427 | 637.57 | 2 ##### | 2.81 | 0.50 |
| RELISNASDALDKI   | 1275.6427 | 637.60 | 2 ##### | 3.04 | 0.45 |
| RELISNASDALDKI   | 1275.6427 | 637.56 | 2 ##### | 3.15 | 0.52 |
| RELISNASDALDKI   | 1275.6427 | 637.56 | 2 ##### | 3.16 | 0.52 |
| RELISNASDALDKI   | 1275.6427 | 637.65 | 2 ##### | 3.17 | 0.35 |
| RELISNASDALDKI   | 1275.6427 | 637.59 | 2 ##### | 3.22 | 0.47 |
| RELISNASDALDKI   | 1275.6427 | 637.62 | 2 ##### | 3.28 | 0.40 |
| RELISNASDALDKI   | 1275.6427 | 637.59 | 2 ##### | 3.30 | 0.47 |
| RELISNASDALDKI   | 1275.6427 | 637.60 | 2 ##### | 3.37 | 0.44 |
| RELISNASDALDKI   | 1275.6427 | 637.55 | 2 ##### | 3.38 | 0.55 |
| RELISNASDALDKI   | 1275.6427 | 637.62 | 2 ##### | 3.43 | 0.41 |
| RELISNASDALDKI   | 1275.6427 | 637.59 | 2 ##### | 3.46 | 0.47 |
| RELISNASDALDKI   | 1275.6427 | 637.58 | 2 ##### | 3.56 | 0.49 |
| RELISNASDALDKI   | 1275.6427 | 637.61 | 2 ##### | 3.65 | 0.42 |
| RELISNASDALDKI   | 1275.6427 | 637.56 | 2 ##### | 3.75 | 0.53 |
| RELISNASDALDKI   | 1275.6427 | 637.56 | 2 ##### | 3.75 | 0.53 |
| RELISNASDALDKI   | 1275.6427 | 637.58 | 2 ##### | 4.07 | 0.49 |
| RELISNASDALDKI   | 1275.6427 | 637.56 | 2 ##### | 4.14 | 0.52 |
| RELISNASDALDKIRL | 1544.8279 | 772.18 | 2 ##### | 3.21 | 0.47 |
| RELISNASDALDKIRL | 1544.8279 | 772.18 | 2 ##### | 3.29 | 0.47 |
| RELISNASDALDKIRL | 1544.8279 | 772.17 | 2 ##### | 3.45 | 0.48 |
| RELISNASDALDKIRL | 1544.8279 | 772.17 | 2 ##### | 3.49 | 0.48 |
| RELISNASDALDKIRL | 1544.8279 | 772.18 | 2 ##### | 3.63 | 0.48 |
| RELISNASDALDKIRL | 1544.8279 | 772.17 | 2 ##### | 3.68 | 0.49 |
| RELISNASDALDKIRL | 1544.8279 | 772.18 | 2 ##### | 3.79 | 0.47 |
| RELISNSSDALDKI   | 1291.6376 | 645.61 | 2 ##### | 2.60 | 0.42 |
| RELISNSSDALDKI   | 1291.6376 | 645.65 | 2 ##### | 2.62 | 0.34 |
| RELISNSSDALDKI   | 1291.6376 | 645.66 | 2 ##### | 2.69 | 0.32 |
| RELISNSSDALDKI   | 1291.6376 | 645.61 | 2 ##### | 3.13 | 0.42 |

|                       |           |        |         |      |      |
|-----------------------|-----------|--------|---------|------|------|
| RELISNSSDALDKI        | 1291.6376 | 645.60 | 2 ##### | 3.17 | 0.44 |
| RELISNSSDALDKI        | 1291.6376 | 645.63 | 2 ##### | 3.20 | 0.38 |
| RELISNSSDALDKI        | 1291.6376 | 645.63 | 2 ##### | 3.31 | 0.38 |
| RELISNSSDALDKI        | 1291.6376 | 645.60 | 2 ##### | 3.36 | 0.43 |
| RELISNSSDALDKI        | 1291.6376 | 645.59 | 2 ##### | 3.43 | 0.45 |
| RELISNSSDALDKI        | 1291.6376 | 645.60 | 2 ##### | 3.50 | 0.44 |
| RELISNSSDALDKI        | 1291.6376 | 645.61 | 2 ##### | 3.54 | 0.42 |
| RELNDFISYLQRE         | 1397.7059 | 698.72 | 2 ##### | 2.61 | 0.27 |
| RELNDFISYLQRE         | 1397.7059 | 698.65 | 2 ##### | 2.75 | 0.41 |
| RELNDFISYLQRE         | 1397.7059 | 698.62 | 2 ##### | 3.17 | 0.46 |
| RELNDFISYLQRE         | 1397.7059 | 698.61 | 2 ##### | 3.75 | 0.50 |
| RESLVVNYEDLAARE       | 1478.7485 | 739.12 | 2 ##### | 3.07 | 0.52 |
| RESLVVNYEDLAARE       | 1478.7485 | 739.17 | 2 ##### | 3.19 | 0.41 |
| RESLVVNYEDLAARE       | 1478.7485 | 739.14 | 2 ##### | 3.25 | 0.47 |
| RESVFTVEGGHRA         | 1217.5909 | 608.63 | 2 ##### | 2.53 | 0.33 |
| RETLLNSATTSLSKVV      | 1478.7697 | 739.14 | 2 ##### | 2.86 | 0.49 |
| RETLLNSATTSLSKVV      | 1478.7697 | 739.15 | 2 ##### | 3.22 | 0.46 |
| RETLLNSATTSLSKVV      | 1478.7697 | 739.17 | 2 ##### | 3.47 | 0.44 |
| RETLLNSATTSLSKVV      | 1478.7697 | 739.10 | 2 ##### | 3.75 | 0.57 |
| RETLLNSATTSLSKVV      | 1478.7697 | 739.10 | 2 ##### | 3.85 | 0.57 |
| RETLLNSATTSLSKVV      | 1478.7697 | 739.12 | 2 ##### | 3.90 | 0.54 |
| RETVEEGEEIISLEKK      | 1604.7902 | 802.23 | 2 ##### | 2.89 | 0.34 |
| RETVEEGEEIISLEKK      | 1604.7902 | 802.22 | 2 ##### | 3.14 | 0.35 |
| RETVEEGEEIISLEKK      | 1604.7902 | 802.22 | 2 ##### | 3.48 | 0.35 |
| RETVEEGEEIISLEKK      | 1604.7902 | 802.24 | 2 ##### | 3.53 | 0.31 |
| REVDIGIPDATGRL        | 1242.6324 | 621.17 | 2 ##### | 3.14 | 0.30 |
| REVDIGIPDATGRL        | 1242.6324 | 621.10 | 2 ##### | 3.36 | 0.42 |
| REVDIGIPDATGRL        | 1242.6324 | 621.06 | 2 ##### | 3.36 | 0.51 |
| REVDIGIPDATGRL        | 1242.6324 | 621.06 | 2 ##### | 3.52 | 0.50 |
| REVIELPLTNPELFQRV     | 1797.9745 | 898.77 | 2 ##### | 3.31 | 0.44 |
| REVIELPLTNPELFQRV     | 1797.9745 | 898.76 | 2 ##### | 3.89 | 0.45 |
| REVIELPLTNPELFQRV     | 1797.9745 | 898.74 | 2 ##### | 3.95 | 0.49 |
| REVSDGIVAPGYEEEEALKI  | 1805.8804 | 902.75 | 2 ##### | 2.98 | 0.38 |
| REVSDGIVAPGYEEEEALKI  | 1805.8804 | 902.77 | 2 ##### | 3.05 | 0.34 |
| REVSDGIVAPGYEEEEALKI  | 1805.8804 | 902.75 | 2 ##### | 3.72 | 0.38 |
| RFEELNADLFRG          | 1253.6161 | 626.62 | 2 ##### | 2.52 | 0.38 |
| RFEELNADLFRG          | 1253.6161 | 626.61 | 2 ##### | 2.70 | 0.40 |
| RFEELNADLFRG          | 1253.6161 | 626.60 | 2 ##### | 2.75 | 0.41 |
| RFEELNADLFRG          | 1253.6161 | 626.56 | 2 ##### | 2.85 | 0.49 |
| RFEELNADLFRG          | 1253.6161 | 626.60 | 2 ##### | 2.89 | 0.41 |
| RFEELNADLFRG          | 1253.6161 | 626.59 | 2 ##### | 3.06 | 0.44 |
| RFGIVTSSAGTGTTEDTEAKK | 1871.8868 | 935.62 | 2 ##### | 3.94 | 0.64 |
| RFGIVTSSAGTGTTEDTEAKK | 1871.8868 | 935.63 | 2 ##### | 4.10 | 0.62 |
| RFGIVTSSAGTGTTEDTEAKK | 1871.8868 | 935.62 | 2 ##### | 4.37 | 0.65 |
| RFGIVTSSAGTGTTEDTEAKK | 1871.8868 | 935.61 | 2 ##### | 4.79 | 0.67 |
| RFGIVTSSAGTGTTEDTEAKK | 1871.8868 | 935.60 | 2 ##### | 4.91 | 0.68 |
| RFGIVTSSAGTGTTEDTEAKK | 1871.8868 | 935.62 | 2 ##### | 5.31 | 0.64 |
| RFGIVTSSAGTGTTEDTEAKK | 1871.8868 | 935.59 | 2 ##### | 5.42 | 0.70 |
| RFGIVTSSAGTGTTEDTEAKK | 1871.8868 | 935.63 | 2 ##### | 5.64 | 0.62 |
| RFGQGGAGPVGQQGPRG     | 1341.6658 | 670.61 | 2 ##### | 3.01 | 0.44 |
| RFGQGGAGPVGQQGPRG     | 1341.6658 | 670.66 | 2 ##### | 3.02 | 0.35 |
| RFGQGGAGPVGQQGPRG     | 1341.6658 | 670.60 | 2 ##### | 3.19 | 0.46 |
| RFGQGGAGPVGQQGPRG     | 1341.6658 | 670.61 | 2 ##### | 3.30 | 0.44 |
| RFGQGGAGPVGQQGPRG     | 1341.6658 | 670.57 | 2 ##### | 3.31 | 0.53 |
| RFGQGGAGPVGQQGPRG     | 1341.6658 | 670.60 | 2 ##### | 3.33 | 0.47 |
| RFGQGGAGPVGQQGPRG     | 1341.6658 | 670.60 | 2 ##### | 3.46 | 0.48 |



|                      |           |        |         |      |      |
|----------------------|-----------|--------|---------|------|------|
| RFHVEEEGKGD          | 1159.5742 | 579.63 | 2 ##### | 2.54 | 0.32 |
| RFHVEEEGKGD          | 1159.5742 | 579.64 | 2 ##### | 2.87 | 0.30 |
| RFHVEEEGKGD          | 1159.5742 | 579.59 | 2 ##### | 2.91 | 0.40 |
| RFLEQQNKVLQTKW       | 1475.8217 | 737.82 | 2 ##### | 2.91 | 0.17 |
| RFPGQLNADLRK         | 1130.5953 | 565.13 | 2 ##### | 2.52 | 0.33 |
| RFPGQLNADLRK         | 1130.5953 | 565.11 | 2 ##### | 2.58 | 0.38 |
| RFPGQLNADLRK         | 1130.5953 | 565.20 | 2 ##### | 2.59 | 0.19 |
| RFPGQLNADLRK         | 1130.5953 | 565.10 | 2 ##### | 2.65 | 0.39 |
| RFPGQLNADLRK         | 1130.5953 | 565.04 | 2 ##### | 2.77 | 0.51 |
| RFPGQLNADLRK         | 1130.5953 | 565.11 | 2 ##### | 2.82 | 0.37 |
| RFPGQLNADLRK         | 1130.5953 | 565.07 | 2 ##### | 2.96 | 0.45 |
| RFPGQLNADLRK         | 1130.5953 | 565.14 | 2 ##### | 3.15 | 0.32 |
| RFPGQLNADLRK         | 1130.5953 | 565.08 | 2 ##### | 3.15 | 0.43 |
| RFPGQLNADLRK         | 1130.5953 | 565.13 | 2 ##### | 3.17 | 0.34 |
| RFPGQLNADLRK         | 1130.5953 | 565.10 | 2 ##### | 3.21 | 0.39 |
| RFPGQLNADLRK         | 1130.5953 | 565.11 | 2 ##### | 3.37 | 0.38 |
| RFTPGTFTNQIAAFRE     | 1698.8599 | 849.13 | 2 ##### | 4.31 | 0.60 |
| RFTPGTFTNQIAAFRE     | 1698.8599 | 849.16 | 2 ##### | 4.67 | 0.54 |
| RFTQAGSEVSALLGRI     | 1435.7540 | 717.74 | 2 ##### | 2.72 | 0.27 |
| RFTQAGSEVSALLGRI     | 1435.7540 | 717.69 | 2 ##### | 2.95 | 0.37 |
| RFTQAGSEVSALLGRI     | 1435.7540 | 717.63 | 2 ##### | 3.39 | 0.49 |
| RFTQAGSEVSALLGRI     | 1435.7540 | 717.65 | 2 ##### | 3.47 | 0.46 |
| RFTQAGSEVSALLGRI     | 1435.7540 | 717.66 | 2 ##### | 3.57 | 0.43 |
| RFTQAGSEVSALLGRI     | 1435.7540 | 717.65 | 2 ##### | 3.91 | 0.46 |
| RFTQAGSEVSALLGRI     | 1435.7540 | 717.74 | 2 ##### | 3.95 | 0.28 |
| RGAAQNIIPASTGAAKA    | 1369.7434 | 684.66 | 2 ##### | 2.84 | 0.41 |
| RGAAQNIIPASTGAAKA    | 1369.7434 | 684.69 | 2 ##### | 3.12 | 0.37 |
| RGAAQNIIPASTGAAKA    | 1369.7434 | 684.65 | 2 ##### | 3.12 | 0.45 |
| RGAAQNIIPASTGAAKA    | 1369.7434 | 684.68 | 2 ##### | 3.23 | 0.37 |
| RGAAQNIIPASTGAAKA    | 1369.7434 | 684.67 | 2 ##### | 3.28 | 0.40 |
| RGAAQNIIPASTGAAKA    | 1369.7434 | 684.63 | 2 ##### | 3.36 | 0.49 |
| RGAAQNIIPASTGAAKA    | 1369.7434 | 684.65 | 2 ##### | 3.37 | 0.45 |
| RGAAQNIIPASTGAAKA    | 1369.7434 | 684.65 | 2 ##### | 3.46 | 0.45 |
| RGAAQNIIPASTGAAKA    | 1369.7434 | 684.63 | 2 ##### | 3.47 | 0.49 |
| RGAAQNIIPASTGAAKA    | 1369.7434 | 684.62 | 2 ##### | 3.48 | 0.51 |
| RGAAQNIIPASTGAAKA    | 1369.7434 | 684.69 | 2 ##### | 3.52 | 0.37 |
| RGAAQNIIPASTGAAKA    | 1369.7434 | 684.61 | 2 ##### | 3.52 | 0.52 |
| RGAAQNIIPASTGAAKA    | 1369.7434 | 684.70 | 2 ##### | 3.56 | 0.34 |
| RGAAQNIIPASTGAAKA    | 1369.7434 | 684.63 | 2 ##### | 3.62 | 0.48 |
| RGAAQNIIPASTGAAKA    | 1369.7434 | 684.63 | 2 ##### | 3.65 | 0.48 |
| RGAAQNIIPASTGAAKA    | 1369.7434 | 684.63 | 2 ##### | 3.71 | 0.48 |
| RGAAQNIIPASTGAAKA    | 1369.7434 | 684.67 | 2 ##### | 3.72 | 0.41 |
| RGAAQNIIPASTGAAKA    | 1369.7434 | 684.67 | 2 ##### | 3.78 | 0.40 |
| RGAAQNIIPASTGAAKA    | 1369.7434 | 684.66 | 2 ##### | 3.88 | 0.43 |
| RGAGTGGLGLAVEGPSEAKM | 1570.8071 | 785.19 | 2 ##### | 2.90 | 0.43 |
| RGAGTGGLGLAVEGPSEAKM | 1570.8071 | 785.13 | 2 ##### | 3.46 | 0.55 |
| RGAGTGGLGLAVEGPSEAKM | 1570.8071 | 785.10 | 2 ##### | 3.49 | 0.61 |
| RGAGTGGLGLAVEGPSEAKM | 1570.8071 | 785.11 | 2 ##### | 3.91 | 0.59 |
| RGAGTGGLGLAVEGPSEAKM | 1570.8071 | 785.13 | 2 ##### | 4.06 | 0.55 |
| RGATQQILDEAERS       | 1330.6598 | 665.16 | 2 ##### | 3.28 | 0.34 |
| RGATQQILDEAERS       | 1330.6598 | 665.15 | 2 ##### | 3.42 | 0.35 |
| RGATQQILDEAERS       | 1330.6598 | 665.14 | 2 ##### | 3.65 | 0.37 |
| RGDEELDSLIIKA        | 1118.5576 | 559.14 | 2 ##### | 2.50 | 0.27 |
| RGDEELDSLIIKA        | 1118.5576 | 559.16 | 2 ##### | 3.11 | 0.24 |
| RGDEELDSLIIKA        | 1118.5576 | 559.17 | 2 ##### | 3.29 | 0.22 |
| RGDLGIEIPAEKV        | 1141.6100 | 570.56 | 2 ##### | 2.82 | 0.48 |

|                           |           |        |         |      |      |
|---------------------------|-----------|--------|---------|------|------|
| RGDLGIEIPAEKV             | 1141.6100 | 570.60 | 2 ##### | 2.95 | 0.41 |
| RGDLGIEIPAEKV             | 1141.6100 | 570.57 | 2 ##### | 2.95 | 0.48 |
| RGDLGIEIPAEKV             | 1141.6100 | 570.58 | 2 ##### | 3.00 | 0.45 |
| RGDLGIEIPAEKV             | 1141.6100 | 570.60 | 2 ##### | 3.01 | 0.42 |
| RGDLGIEIPAEKV             | 1141.6100 | 570.57 | 2 ##### | 3.03 | 0.46 |
| RGDLGIEIPAEKV             | 1141.6100 | 570.59 | 2 ##### | 3.13 | 0.43 |
| RGDLGIEIPAEKV             | 1141.6100 | 570.53 | 2 ##### | 3.17 | 0.56 |
| RGDLGIEIPAEKV             | 1141.6100 | 570.57 | 2 ##### | 3.40 | 0.48 |
| RGD TDQASNILASFGLSARD     | 1822.8929 | 911.32 | 2 ##### | 2.69 | 0.25 |
| RGD TDQASNILASFGLSARD     | 1822.8929 | 911.17 | 2 ##### | 3.79 | 0.55 |
| RGD TDQASNILASFGLSARD     | 1822.8929 | 911.15 | 2 ##### | 4.77 | 0.59 |
| RGDVTAEAAAGASPAKA         | 1373.6543 | 686.67 | 2 ##### | 2.60 | 0.32 |
| RGDVTAEAAAGASPAKA         | 1373.6543 | 686.64 | 2 ##### | 2.70 | 0.38 |
| RGDVTAEAAAGASPAKA         | 1373.6543 | 686.63 | 2 ##### | 2.98 | 0.40 |
| RGDVTAEAAAGASPAKA         | 1373.6543 | 686.59 | 2 ##### | 3.00 | 0.47 |
| RGDVTAEAAAGASPAKA         | 1373.6543 | 686.60 | 2 ##### | 3.07 | 0.46 |
| RGDVTAEAAAGASPAKA         | 1373.6543 | 686.60 | 2 ##### | 3.10 | 0.46 |
| RGDVTAEAAAGASPAKA         | 1373.6543 | 686.59 | 2 ##### | 3.15 | 0.47 |
| RGDVTAEAAAGASPAKA         | 1373.6543 | 686.61 | 2 ##### | 3.15 | 0.43 |
| RGDVTAEAAAGASPAKA         | 1373.6543 | 686.65 | 2 ##### | 3.32 | 0.36 |
| RGDVTAEAAAGASPAKA         | 1373.6543 | 686.61 | 2 ##### | 3.34 | 0.43 |
| RGDVTAEAAAGASPAKA         | 1373.6543 | 686.60 | 2 ##### | 3.63 | 0.45 |
| RGGGGNFGPGPGSNFRG         | 1377.6294 | 688.67 | 2 ##### | 2.56 | 0.28 |
| RGGGGNFGPGPGSNFRG         | 1377.6294 | 688.61 | 2 ##### | 2.74 | 0.41 |
| RGGGGNFGPGPGSNFRG         | 1377.6294 | 688.67 | 2 ##### | 2.79 | 0.29 |
| RGGGGNFGPGPGSNFRG         | 1377.6294 | 688.64 | 2 ##### | 2.89 | 0.34 |
| RGGGGNFGPGPGSNFRG         | 1377.6294 | 688.61 | 2 ##### | 2.92 | 0.41 |
| RGGGGNFGPGPGSNFRG         | 1377.6294 | 688.67 | 2 ##### | 2.95 | 0.29 |
| RGGGGNFGPGPGSNFRG         | 1377.6294 | 688.61 | 2 ##### | 3.09 | 0.41 |
| RGGGGNFGPGPGSNFRG         | 1377.6294 | 688.60 | 2 ##### | 3.18 | 0.42 |
| RGGNIGDGGGAADRV           | 1116.5028 | 558.10 | 2 ##### | 2.56 | 0.29 |
| RGGNIGDGGGAADRV           | 1116.5028 | 558.07 | 2 ##### | 3.10 | 0.36 |
| RGGNIGDGGGAADRV           | 1116.5028 | 558.09 | 2 ##### | 3.19 | 0.31 |
| RGKLDGNQDLIRF             | 1228.6644 | 614.17 | 2 ##### | 2.77 | 0.32 |
| RGKLDGNQDLIRF             | 1228.6644 | 614.23 | 2 ##### | 2.80 | 0.21 |
| RGKLDGNQDLIRF             | 1228.6644 | 614.11 | 2 ##### | 2.85 | 0.44 |
| RGKLDGNQDLIRF             | 1228.6644 | 614.12 | 2 ##### | 2.98 | 0.42 |
| RGKLDGNQDLIRF             | 1228.6644 | 614.11 | 2 ##### | 3.02 | 0.45 |
| RGKLDGNQDLIRF             | 1228.6644 | 614.12 | 2 ##### | 3.28 | 0.43 |
| RGLFIIDPNGVVKH            | 1271.7358 | 635.74 | 2 ##### | 2.69 | 0.26 |
| RGLMGNIIIEYEVAGIKG        | 1833.0190 | 916.42 | 2 ##### | 2.85 | 0.18 |
| RGLMGNIIIEYEVAGIKG        | 1833.0190 | 916.41 | 2 ##### | 2.93 | 0.21 |
| RGNFGGSFAGSFGGAGGHAPGVARK | 2034.9529 | 678.14 | 3 ##### | 3.73 | 0.53 |
| RGNPTVEVDLYTAKG           | 1406.7162 | 703.18 | 2 ##### | 2.87 | 0.35 |
| RGNPTVEVDLYTAKG           | 1406.7162 | 703.03 | 2 ##### | 2.91 | 0.65 |
| RGNPTVEVDLYTAKG           | 1406.7162 | 703.11 | 2 ##### | 3.06 | 0.50 |
| RGNPTVEVDLYTAKG           | 1406.7162 | 703.14 | 2 ##### | 3.23 | 0.43 |
| RGNPTVEVDLYTAKG           | 1406.7162 | 703.05 | 2 ##### | 3.36 | 0.62 |
| RGNPTVEVDLYTAKG           | 1406.7162 | 703.09 | 2 ##### | 3.63 | 0.53 |
| RGNPTVEVDLYTAKG           | 1406.7162 | 703.08 | 2 ##### | 3.80 | 0.55 |
| RGNPTVEVDLYTAKG           | 1406.7162 | 703.03 | 2 ##### | 3.90 | 0.65 |
| RGSTAPVGGGSFPTITPRE       | 1601.8282 | 800.77 | 2 ##### | 2.86 | 0.29 |
| RGSTAPVGGGSFPTITPRE       | 1601.8282 | 800.65 | 2 ##### | 3.34 | 0.53 |
| RGSTAPVGGGSFPTITPRE       | 1601.8282 | 800.68 | 2 ##### | 3.52 | 0.47 |
| RGSTAPVGGGSFPTITPRE       | 1601.8282 | 800.64 | 2 ##### | 3.61 | 0.54 |
| RGSTAPVGGGSFPTITPRE       | 1601.8282 | 800.60 | 2 ##### | 3.77 | 0.64 |

|                           |           |         |         |      |      |
|---------------------------|-----------|---------|---------|------|------|
| RGSTAPVGGGSFPTITPRE       | 1601.8282 | 800.66  | 2 ##### | 3.79 | 0.51 |
| RGSTAPVGGGSFPTITPRE       | 1601.8282 | 800.69  | 2 ##### | 3.79 | 0.44 |
| RGSTAPVGGGSFPTITPRE       | 1601.8282 | 800.62  | 2 ##### | 3.91 | 0.59 |
| RGSTAPVGGGSFPTITPRE       | 1601.8282 | 800.61  | 2 ##### | 4.11 | 0.61 |
| RGSTAPVGGGSFPTITPRE       | 1601.8282 | 800.60  | 2 ##### | 4.21 | 0.63 |
| RGSTAPVGGGSFPTITPRE       | 1601.8282 | 800.60  | 2 ##### | 4.43 | 0.62 |
| RGSTAPVGGGSFPTITPRE       | 1601.8282 | 800.62  | 2 ##### | 4.48 | 0.59 |
| RGSTAPVGGGSFPTITPRE       | 1601.8282 | 800.63  | 2 ##### | 4.51 | 0.56 |
| RGSYGDLDGGPIITTQVTIPKD    | 1917.0327 | 958.34  | 2 ##### | 2.58 | 0.35 |
| RGSYGDLDGGPIITTQVTIPKD    | 1917.0327 | 958.41  | 2 ##### | 2.59 | 0.22 |
| RGSYGDLDGGPIITTQVTIPKD    | 1917.0327 | 958.28  | 2 ##### | 3.16 | 0.48 |
| RGSYGDLDGGPIITTQVTIPKD    | 1917.0327 | 958.21  | 2 ##### | 4.04 | 0.62 |
| RGSYGDLDGGPIITTQVTIPKD    | 1917.0327 | 958.21  | 2 ##### | 4.60 | 0.61 |
| RGSYGDLDGGPIITTQVTIPKD    | 1917.0327 | 958.20  | 2 ##### | 4.64 | 0.64 |
| RGSYGDLDGGPIITTQVTIPKD    | 1917.0327 | 958.21  | 2 ##### | 5.01 | 0.62 |
| RGSYGDLDGGPIITTQVTIPKD    | 1917.0327 | 958.20  | 2 ##### | 5.04 | 0.63 |
| RGSYGDLDGGPIITTQVTIPKD    | 1917.0327 | 958.23  | 2 ##### | 5.42 | 0.57 |
| RGSYGDLDGGPIITTQVTIPKD    | 1917.0327 | 958.21  | 2 ##### | 5.46 | 0.61 |
| RGSYGDLDGGPIITTQVTIPKD    | 1917.0327 | 958.17  | 2 ##### | 5.66 | 0.70 |
| RGVPESLASGEGAGAGLPALDLAKA | 2080.0920 | 1039.67 | 2 ##### | 4.86 | 0.74 |
| RGVPESLASGEGAGAGLPALDLAKA | 2080.0920 | 1039.72 | 2 ##### | 5.43 | 0.65 |
| RGVPESLASGEGAGAGLPALDLAKA | 2080.0920 | 1039.71 | 2 ##### | 5.99 | 0.66 |
| RGVVQDLQQAISKL            | 1285.7111 | 642.73  | 2 ##### | 2.63 | 0.24 |
| RGVVQDLQQAISKL            | 1285.7111 | 642.64  | 2 ##### | 2.69 | 0.42 |
| RGVVQDLQQAISKL            | 1285.7111 | 642.62  | 2 ##### | 2.90 | 0.47 |
| RGVVQDLQQAISKL            | 1285.7111 | 642.65  | 2 ##### | 3.14 | 0.41 |
| RGVVQDLQQAISKL            | 1285.7111 | 642.61  | 2 ##### | 3.17 | 0.49 |
| RGVVQDLQQAISKL            | 1285.7111 | 642.61  | 2 ##### | 3.39 | 0.49 |
| RGYFIQPTVFGDVKD           | 1470.7627 | 735.09  | 2 ##### | 2.71 | 0.58 |
| RGYFIQPTVFGDVKD           | 1470.7627 | 735.18  | 2 ##### | 2.79 | 0.40 |
| RGYISPYFINTSKG            | 1389.7048 | 694.67  | 2 ##### | 2.68 | 0.36 |
| RGYISPYFINTSKG            | 1389.7048 | 694.63  | 2 ##### | 2.91 | 0.44 |
| RGYISPYFINTSKG            | 1389.7048 | 694.60  | 2 ##### | 3.10 | 0.51 |
| RGYSFTTTAERE              | 1132.5270 | 566.09  | 2 ##### | 2.53 | 0.35 |
| RGYSFTTTAERE              | 1132.5270 | 566.06  | 2 ##### | 2.54 | 0.41 |
| RGYSFTTTAERE              | 1132.5270 | 565.92  | 2 ##### | 2.54 | 0.69 |
| RGYSFTTTAERE              | 1132.5270 | 565.90  | 2 ##### | 2.63 | 0.73 |
| RGYSFTTTAERE              | 1132.5270 | 566.08  | 2 ##### | 2.66 | 0.36 |
| RGYSFTTTAERE              | 1132.5270 | 566.10  | 2 ##### | 2.68 | 0.34 |
| RGYSFTTTAERE              | 1132.5270 | 566.06  | 2 ##### | 2.69 | 0.40 |
| RGYSFTTTAERE              | 1132.5270 | 566.02  | 2 ##### | 2.71 | 0.48 |
| RGYSFTTTAERE              | 1132.5270 | 566.00  | 2 ##### | 2.74 | 0.52 |
| RGYSFTTTAERE              | 1132.5270 | 566.08  | 2 ##### | 2.74 | 0.37 |
| RGYSFTTTAERE              | 1132.5270 | 566.01  | 2 ##### | 2.79 | 0.50 |
| RGYSFTTTAERE              | 1132.5270 | 566.04  | 2 ##### | 2.80 | 0.44 |
| RGYSFTTTAERE              | 1132.5270 | 566.09  | 2 ##### | 2.80 | 0.35 |
| RGYSFTTTAERE              | 1132.5270 | 565.94  | 2 ##### | 2.84 | 0.65 |
| RGYSFTTTAERE              | 1132.5270 | 566.03  | 2 ##### | 3.03 | 0.47 |
| RGYSFTTTAERE              | 1132.5270 | 566.09  | 2 ##### | 3.21 | 0.35 |
| RHDGYGSHGPLLPLPSRY        | 1702.8660 | 567.46  | 3 ##### | 3.16 | 0.49 |
| RHDGYGSHGPLLPLPSRY        | 1702.8660 | 567.48  | 3 ##### | 3.69 | 0.44 |
| RHGFEAASIKEERG            | 1373.6808 | 686.65  | 2 ##### | 2.82 | 0.38 |
| RHGFEAASIKEERG            | 1373.6808 | 686.62  | 2 ##### | 2.85 | 0.45 |
| RHGFEAASIKEERG            | 1373.6808 | 686.62  | 2 ##### | 2.88 | 0.44 |
| RHGFEAASIKEERG            | 1373.6808 | 686.63  | 2 ##### | 3.28 | 0.43 |
| RHGSLGFLPRK               | 983.5421  | 491.51  | 2 ##### | 2.86 | 0.52 |

|                      |           |        |         |      |      |
|----------------------|-----------|--------|---------|------|------|
| RHGSLGFLPRK          | 983.5421  | 491.56 | 2 ##### | 3.17 | 0.43 |
| RHGSLGFLPRK          | 983.5421  | 491.57 | 2 ##### | 3.17 | 0.41 |
| RHLTGEFEKKY          | 1088.5735 | 544.14 | 2 ##### | 2.57 | 0.30 |
| RHLTGEFEKKY          | 1088.5735 | 544.11 | 2 ##### | 2.64 | 0.36 |
| RHLTGEFEKKY          | 1088.5735 | 544.11 | 2 ##### | 2.66 | 0.35 |
| RHLTGEFEKKY          | 1088.5735 | 544.18 | 2 ##### | 2.67 | 0.22 |
| RHLTGEFEKKY          | 1088.5735 | 544.13 | 2 ##### | 2.95 | 0.31 |
| RHVFGESDELIGQKV      | 1458.7223 | 729.07 | 2 ##### | 3.66 | 0.57 |
| RHVFGESDELIGQKV      | 1458.7223 | 729.06 | 2 ##### | 3.83 | 0.61 |
| RHVFGESDELIGQKV      | 1458.7223 | 729.04 | 2 ##### | 3.95 | 0.65 |
| RHVFGESDELIGQKV      | 1458.7223 | 729.04 | 2 ##### | 3.96 | 0.64 |
| RHVFGESDELIGQKV      | 1458.7223 | 729.05 | 2 ##### | 4.06 | 0.62 |
| RHVFGESDELIGQKV      | 1458.7223 | 729.05 | 2 ##### | 4.11 | 0.63 |
| RHVFGESDELIGQKV      | 1458.7223 | 729.06 | 2 ##### | 4.16 | 0.60 |
| RHVFGESDELIGQKV      | 1458.7223 | 729.07 | 2 ##### | 4.16 | 0.57 |
| RHVFGESDELIGQKV      | 1458.7223 | 729.07 | 2 ##### | 4.25 | 0.59 |
| RHVFGGDDDFKS         | 1120.5422 | 560.02 | 2 ##### | 2.67 | 0.50 |
| RHVFGGDDDFKS         | 1120.5422 | 559.99 | 2 ##### | 2.82 | 0.57 |
| RHVFGGDDDFKS         | 1120.5422 | 560.03 | 2 ##### | 2.88 | 0.48 |
| RHVFGGDDDFKS         | 1120.5422 | 560.05 | 2 ##### | 2.90 | 0.44 |
| RHVFGGDDDFKS         | 1120.5422 | 559.98 | 2 ##### | 2.99 | 0.59 |
| RHVFGGDDDFKS         | 1120.5422 | 560.03 | 2 ##### | 3.10 | 0.48 |
| RHVFGGDDDFKS         | 1120.5422 | 559.99 | 2 ##### | 3.10 | 0.56 |
| RHVGDLGNVTAGKD       | 1167.6117 | 583.62 | 2 ##### | 2.54 | 0.37 |
| RHVGDLGNVTAGKD       | 1167.6117 | 583.63 | 2 ##### | 2.56 | 0.35 |
| RHVGDLGNVTAGKD       | 1167.6117 | 583.60 | 2 ##### | 2.61 | 0.40 |
| RHVGDLGNVTAGKD       | 1167.6117 | 583.58 | 2 ##### | 2.65 | 0.46 |
| RHVGDLGNVTAGKD       | 1167.6117 | 583.56 | 2 ##### | 2.70 | 0.49 |
| RHVGDLGNVTAGKD       | 1167.6117 | 583.61 | 2 ##### | 2.96 | 0.40 |
| RIADGYEQAARI         | 1093.5272 | 546.55 | 2 ##### | 2.95 | 0.42 |
| RIADGYEQAARI         | 1093.5272 | 546.53 | 2 ##### | 3.52 | 0.46 |
| RIANLQTDLSDGRLR      | 1415.7489 | 707.68 | 2 ##### | 2.88 | 0.40 |
| RIANLQTDLSDGRLR      | 1415.7489 | 707.65 | 2 ##### | 2.88 | 0.45 |
| RIAQSDYIPTQQDVLRT    | 1746.9021 | 873.28 | 2 ##### | 2.57 | 0.34 |
| RIAQSDYIPTQQDVLRT    | 1746.9021 | 873.23 | 2 ##### | 3.33 | 0.44 |
| RIAQSDYIPTQQDVLRT    | 1746.9021 | 873.24 | 2 ##### | 3.78 | 0.42 |
| RIEDVTPIPSDSTRR      | 1429.7169 | 714.62 | 2 ##### | 3.11 | 0.47 |
| RIEDVTPIPSDSTRR      | 1429.7169 | 714.62 | 2 ##### | 3.22 | 0.48 |
| RIEDVTPIPSDSTRR      | 1429.7169 | 714.60 | 2 ##### | 3.34 | 0.51 |
| RIEDVTPIPSDSTRR      | 1429.7169 | 714.60 | 2 ##### | 3.43 | 0.52 |
| RIEDVTPIPSDSTRR      | 1429.7169 | 714.59 | 2 ##### | 3.46 | 0.53 |
| RIEDVTPIPSDSTRR      | 1429.7169 | 714.60 | 2 ##### | 3.55 | 0.52 |
| RIEDVTPIPSDSTRR      | 1429.7169 | 714.59 | 2 ##### | 3.93 | 0.55 |
| RIEDVTPIPSDSTRR      | 1429.7169 | 714.63 | 2 ##### | 4.02 | 0.46 |
| RIEDVTPIPSDSTRR      | 1429.7169 | 714.60 | 2 ##### | 4.04 | 0.53 |
| RIESLSSQLSNLQKE      | 1446.7799 | 723.28 | 2 ##### | 3.82 | 0.23 |
| RIESLSSQLSNLQKE      | 1446.7799 | 723.21 | 2 ##### | 3.85 | 0.35 |
| RIESLSSQLSNLQKE      | 1446.7799 | 723.19 | 2 ##### | 4.30 | 0.40 |
| RIGAEVYHNLKN         | 1143.6157 | 571.69 | 2 ##### | 2.50 | 0.23 |
| RIGAEVYHNLKN         | 1143.6157 | 571.73 | 2 ##### | 2.71 | 0.16 |
| RIGAEVYHNLKN         | 1143.6157 | 571.68 | 2 ##### | 2.89 | 0.26 |
| RIGAEVYHNLKN         | 1143.6157 | 571.68 | 2 ##### | 3.22 | 0.25 |
| RIGAEVYHNLKN         | 1143.6157 | 571.68 | 2 ##### | 3.32 | 0.26 |
| RIGPYQPNVPVGIDYVIPKT | 1969.0793 | 984.27 | 2 ##### | 3.39 | 0.54 |
| RIGPYQPNVPVGIDYVIPKT | 1969.0793 | 984.27 | 2 ##### | 3.45 | 0.53 |
| RIGPYQPNVPVGIDYVIPKT | 1969.0793 | 984.26 | 2 ##### | 3.60 | 0.56 |

|                           |           |        |         |      |      |
|---------------------------|-----------|--------|---------|------|------|
| RIGPYQPNVPVGDYVIPKT       | 1969.0793 | 984.24 | 2 ##### | 3.77 | 0.61 |
| RIHFPLATYAPVISA EKA       | 1756.9633 | 585.55 | 3 ##### | 3.22 | 0.33 |
| RIHFPLATYAPVISA EKA       | 1756.9633 | 585.50 | 3 ##### | 3.73 | 0.47 |
| RIHFPLATYAPVISA EKA       | 1756.9633 | 585.46 | 3 ##### | 4.00 | 0.57 |
| RIHFPLATYAPVISA EKA       | 1756.9633 | 878.18 | 2 ##### | 4.20 | 0.60 |
| RIHFPLATYAPVISA EKA       | 1756.9633 | 878.15 | 2 ##### | 4.21 | 0.67 |
| RIIDVVYNASNNE LVRT        | 1718.9072 | 859.22 | 2 ##### | 3.43 | 0.46 |
| RIIDVVYNASNNE LVRT        | 1718.9072 | 859.15 | 2 ##### | 4.32 | 0.61 |
| RIIDVVYNASNNE LVRT        | 1718.9072 | 859.18 | 2 ##### | 4.57 | 0.54 |
| RIINEPTAAAIAYGLDKG        | 1659.8953 | 829.67 | 2 ##### | 3.50 | 0.56 |
| RIINEPTAAAIAYGLDKG        | 1659.8953 | 829.66 | 2 ##### | 4.28 | 0.58 |
| RIINEPTAAAIAYGLDKG        | 1659.8953 | 829.66 | 2 ##### | 4.85 | 0.58 |
| RIINEPTAAAIAYGLDKG        | 1659.8953 | 829.62 | 2 ##### | 4.89 | 0.65 |
| RIINEPTAAAIAYGLDKG        | 1659.8953 | 829.64 | 2 ##### | 4.96 | 0.62 |
| RIINEPTAAAIAYGLDKG        | 1659.8953 | 829.64 | 2 ##### | 5.06 | 0.61 |
| RIINEPTAAAIAYGLDKG        | 1659.8953 | 829.63 | 2 ##### | 5.29 | 0.64 |
| RIINEPTAAAIAYGLDKKV       | 1787.9902 | 893.88 | 2 ##### | 3.78 | 0.23 |
| RIITEGFEEAAKEKA           | 1335.7155 | 667.66 | 2 ##### | 2.93 | 0.39 |
| RIITEGFEEAAKEKA           | 1335.7155 | 667.68 | 2 ##### | 3.04 | 0.36 |
| RIITITGTQDQIQNAQYLLQNSVKQ | 2589.3882 | 862.93 | 3 ##### | 4.34 | 0.59 |
| RIITITGTQDQIQNAQYLLQNSVKQ | 2589.3882 | 862.90 | 3 ##### | 5.89 | 0.69 |
| RIITITGTQDQIQNAQYLLQNSVKQ | 2589.3882 | 862.88 | 3 ##### | 5.98 | 0.74 |
| RIITITGTQDQIQNAQYLLQNSVKQ | 2589.3882 | 862.89 | 3 ##### | 6.53 | 0.73 |
| RIITLAGPTNAIFKA           | 1358.8042 | 679.16 | 2 ##### | 2.54 | 0.48 |
| RIITLAGPTNAIFKA           | 1358.8042 | 679.20 | 2 ##### | 2.83 | 0.40 |
| RIITLAGPTNAIFKA           | 1358.8042 | 679.21 | 2 ##### | 2.85 | 0.39 |
| RIITLAGPTNAIFKA           | 1358.8042 | 679.20 | 2 ##### | 2.86 | 0.41 |
| RIITLAGPTNAIFKA           | 1358.8042 | 679.17 | 2 ##### | 2.88 | 0.47 |
| RIITLAGPTNAIFKA           | 1358.8042 | 679.18 | 2 ##### | 3.18 | 0.45 |
| RIITLAGPTNAIFKA           | 1358.8042 | 679.16 | 2 ##### | 3.43 | 0.48 |
| RIITLAGPTNAIFKA           | 1358.8042 | 679.18 | 2 ##### | 3.49 | 0.43 |
| RIITLAGPTNAIFKA           | 1358.8042 | 679.14 | 2 ##### | 3.51 | 0.52 |
| RIITLAGPTNAIFKA           | 1358.8042 | 679.16 | 2 ##### | 3.54 | 0.49 |
| RIITLTGPTNAIFKA           | 1388.8148 | 694.18 | 2 ##### | 3.11 | 0.45 |
| RIITLTGPTNAIFKA           | 1388.8148 | 694.19 | 2 ##### | 3.19 | 0.44 |
| RIITLTGPTNAIFKA           | 1388.8148 | 694.22 | 2 ##### | 3.27 | 0.38 |
| RIITLTGPTNAIFKA           | 1388.8148 | 694.12 | 2 ##### | 3.33 | 0.58 |
| RIITLTGPTNAIFKA           | 1388.8148 | 694.16 | 2 ##### | 3.37 | 0.50 |
| RIITLTGPTNAIFKA           | 1388.8148 | 694.12 | 2 ##### | 3.42 | 0.58 |
| RIITLTGPTNAIFKA           | 1388.8148 | 694.17 | 2 ##### | 3.44 | 0.47 |
| RIITLTGPTNAIFKA           | 1388.8148 | 694.17 | 2 ##### | 3.50 | 0.48 |
| RIITLTGPTNAIFKA           | 1388.8148 | 694.16 | 2 ##### | 3.68 | 0.50 |
| RIITLTGPTNAIFKA           | 1388.8148 | 694.14 | 2 ##### | 3.80 | 0.54 |
| RILAQATSDLVNAIKA          | 1456.8369 | 728.19 | 2 ##### | 2.95 | 0.45 |
| RILDEIEEHSIKI             | 1325.6947 | 662.79 | 2 ##### | 2.98 | 0.12 |
| RILGADTSVDLEETGRV         | 1575.7860 | 787.61 | 2 ##### | 3.15 | 0.56 |
| RILGADTSVDLEETGRV         | 1575.7860 | 787.61 | 2 ##### | 3.77 | 0.56 |
| RILGADTSVDLEETGRV         | 1575.7860 | 787.61 | 2 ##### | 4.46 | 0.57 |
| RILGADTSVDLEETGRV         | 1575.7860 | 787.60 | 2 ##### | 4.49 | 0.59 |
| RILGADTSVDLEETGRV         | 1575.7860 | 787.61 | 2 ##### | 4.55 | 0.57 |
| RILGADTSVDLEETGRV         | 1575.7860 | 787.61 | 2 ##### | 4.59 | 0.57 |
| RILGADTSVDLEETGRV         | 1575.7860 | 787.59 | 2 ##### | 4.61 | 0.60 |
| RILGLLDTHLKT              | 1122.6881 | 561.29 | 2 ##### | 2.61 | 0.11 |
| RILGLLDTHLKT              | 1122.6881 | 561.24 | 2 ##### | 2.63 | 0.20 |
| RILGLLDTHLKT              | 1122.6881 | 561.27 | 2 ##### | 2.63 | 0.16 |
| RILGLLDTHLKT              | 1122.6881 | 561.24 | 2 ##### | 2.66 | 0.21 |

|                     |           |        |         |      |      |
|---------------------|-----------|--------|---------|------|------|
| RILGLLDTHLKT        | 1122.6881 | 561.25 | 2 ##### | 2.76 | 0.20 |
| RILGLLDTHLKT        | 1122.6881 | 561.23 | 2 ##### | 2.84 | 0.22 |
| RILGLLDTHLKT        | 1122.6881 | 561.23 | 2 ##### | 2.91 | 0.23 |
| RINPDGSQSVVEVPYARS  | 1730.8708 | 865.23 | 2 ##### | 2.71 | 0.41 |
| RINPDGSQSVVEVPYARS  | 1730.8708 | 865.23 | 2 ##### | 2.91 | 0.40 |
| RINVYYNEATGGKY      | 1328.6481 | 664.13 | 2 ##### | 3.06 | 0.39 |
| RINVYYNEATGGKY      | 1328.6481 | 664.09 | 2 ##### | 3.46 | 0.46 |
| RINVYYNEATGGKY      | 1328.6481 | 664.08 | 2 ##### | 3.51 | 0.48 |
| RINVYYNEATGNKY      | 1385.6696 | 692.65 | 2 ##### | 2.69 | 0.37 |
| RINVYYNEATGNKY      | 1385.6696 | 692.65 | 2 ##### | 3.05 | 0.38 |
| RINVYYNEATGNKY      | 1385.6696 | 692.61 | 2 ##### | 3.28 | 0.45 |
| RIQLVEEELDRA        | 1243.6528 | 621.73 | 2 ##### | 2.59 | 0.18 |
| RIQLVEEELDRA        | 1243.6528 | 621.66 | 2 ##### | 3.11 | 0.34 |
| RIQQEIAVQNPLVSERL   | 1723.9337 | 861.83 | 2 ##### | 2.67 | 0.28 |
| RIQQEIAVQNPLVSERL   | 1723.9337 | 861.79 | 2 ##### | 2.87 | 0.36 |
| RIQQEIAVQNPLVSERL   | 1723.9337 | 861.87 | 2 ##### | 3.02 | 0.19 |
| RIQQEIAVQNPLVSERL   | 1723.9337 | 861.78 | 2 ##### | 3.62 | 0.36 |
| RIQTQPGYANTLRE      | 1361.7172 | 680.63 | 2 ##### | 3.46 | 0.46 |
| RISGLIYEETR         | 1180.6208 | 590.16 | 2 ##### | 2.54 | 0.30 |
| RISGLIYEETR         | 1180.6208 | 590.09 | 2 ##### | 2.61 | 0.44 |
| RISGLIYEETR         | 1180.6208 | 590.15 | 2 ##### | 2.61 | 0.32 |
| RISGLIYEETR         | 1180.6208 | 590.21 | 2 ##### | 2.61 | 0.21 |
| RISGLIYEETR         | 1180.6208 | 590.14 | 2 ##### | 2.62 | 0.33 |
| RISGLIYEETR         | 1180.6208 | 590.17 | 2 ##### | 2.64 | 0.27 |
| RISGLIYEETR         | 1180.6208 | 590.13 | 2 ##### | 2.65 | 0.37 |
| RISGLIYEETR         | 1180.6208 | 590.12 | 2 ##### | 2.67 | 0.38 |
| RISGLIYEETR         | 1180.6208 | 590.14 | 2 ##### | 2.69 | 0.34 |
| RISGLIYEETR         | 1180.6208 | 590.18 | 2 ##### | 2.73 | 0.27 |
| RISGLIYEETR         | 1180.6208 | 590.11 | 2 ##### | 2.78 | 0.41 |
| RISGLIYEETR         | 1180.6208 | 590.19 | 2 ##### | 2.82 | 0.25 |
| RISGLIYEETR         | 1180.6208 | 590.13 | 2 ##### | 2.88 | 0.37 |
| RISGLIYEETR         | 1180.6208 | 590.08 | 2 ##### | 2.97 | 0.45 |
| RISGLIYEETR         | 1180.6208 | 590.12 | 2 ##### | 2.98 | 0.37 |
| RISGLIYEETR         | 1180.6208 | 590.12 | 2 ##### | 2.98 | 0.38 |
| RISGLIYEETR         | 1180.6208 | 590.08 | 2 ##### | 3.02 | 0.46 |
| RISGLIYEETR         | 1180.6208 | 590.15 | 2 ##### | 3.05 | 0.31 |
| RISGLIYEETR         | 1180.6208 | 590.10 | 2 ##### | 3.05 | 0.42 |
| RISGLIYEETR         | 1180.6208 | 590.09 | 2 ##### | 3.05 | 0.44 |
| RISGLIYEETR         | 1180.6208 | 590.11 | 2 ##### | 3.06 | 0.39 |
| RISGLIYEETR         | 1180.6208 | 590.09 | 2 ##### | 3.10 | 0.45 |
| RISGLIYEETR         | 1180.6208 | 590.14 | 2 ##### | 3.12 | 0.35 |
| RISGLIYEETR         | 1180.6208 | 590.15 | 2 ##### | 3.13 | 0.33 |
| RISGLIYEETR         | 1180.6208 | 590.11 | 2 ##### | 3.18 | 0.41 |
| RISQTNYIPTQQDVLRT   | 1775.9286 | 887.80 | 2 ##### | 3.05 | 0.33 |
| RISSTSGSVSQALQLESKA | 1849.9502 | 924.85 | 2 ##### | 2.59 | 0.25 |
| RISSTSGSVSQALQLESKA | 1849.9502 | 924.84 | 2 ##### | 2.91 | 0.26 |
| RISSTSGSVSQALQLESKA | 1849.9502 | 924.82 | 2 ##### | 3.12 | 0.30 |
| RISVYYNEATGGKY      | 1301.6372 | 650.65 | 2 ##### | 2.59 | 0.35 |
| RISVYYNEATGGKY      | 1301.6372 | 650.57 | 2 ##### | 2.89 | 0.50 |
| RISVYYNEATGGKY      | 1301.6372 | 650.53 | 2 ##### | 3.19 | 0.57 |
| RISVYYNEATGGKY      | 1301.6372 | 650.52 | 2 ##### | 3.50 | 0.60 |
| RISVYYNEATGGKY      | 1301.6372 | 650.54 | 2 ##### | 3.59 | 0.55 |
| RISVYYNEATGGKY      | 1301.6372 | 650.55 | 2 ##### | 3.73 | 0.54 |
| RISVYYNEATGGKY      | 1301.6372 | 650.52 | 2 ##### | 3.81 | 0.61 |
| RISVYYNEATGGKY      | 1301.6372 | 650.52 | 2 ##### | 3.91 | 0.59 |
| RITAHLVHELRR        | 1188.6848 | 594.14 | 2 ##### | 2.61 | 0.40 |

|                      |           |        |         |      |      |
|----------------------|-----------|--------|---------|------|------|
| RITAHLVHELRR         | 1188.6848 | 594.16 | 2 ##### | 2.87 | 0.36 |
| RITAHLVHELRR         | 1188.6848 | 594.18 | 2 ##### | 2.94 | 0.33 |
| RITAHLVHELRR         | 1188.6848 | 594.15 | 2 ##### | 3.10 | 0.38 |
| RITATDAEDQGVKV       | 1247.6115 | 623.59 | 2 ##### | 3.02 | 0.44 |
| RITPSYVAFTPEGERL     | 1566.7799 | 783.22 | 2 ##### | 2.72 | 0.33 |
| RITPSYVAFTPEGERL     | 1566.7799 | 783.21 | 2 ##### | 2.88 | 0.37 |
| RITPSYVAFTPEGERL     | 1566.7799 | 783.13 | 2 ##### | 3.12 | 0.52 |
| RITPSYVAFTPEGERL     | 1566.7799 | 783.15 | 2 ##### | 3.19 | 0.48 |
| RITPSYVAFTPEGERL     | 1566.7799 | 783.12 | 2 ##### | 3.33 | 0.53 |
| RITPSYVAFTPEGERL     | 1566.7799 | 783.13 | 2 ##### | 3.44 | 0.52 |
| RITPSYVAFTPEGERL     | 1566.7799 | 783.10 | 2 ##### | 3.55 | 0.59 |
| RITSLEVENQNLRG       | 1415.7489 | 707.65 | 2 ##### | 3.64 | 0.45 |
| RITSLEVENQNLRG       | 1415.7489 | 707.63 | 2 ##### | 3.65 | 0.48 |
| RITSLEVENQNLRG       | 1415.7489 | 707.63 | 2 ##### | 3.71 | 0.50 |
| RITSLEVENQNLRG       | 1415.7489 | 707.66 | 2 ##### | 3.79 | 0.43 |
| RITSLEVENQNLRG       | 1415.7489 | 707.64 | 2 ##### | 3.96 | 0.48 |
| RITSLEVENQNLRG       | 1415.7489 | 707.64 | 2 ##### | 4.21 | 0.48 |
| RIVAATLSDPELFKE      | 1403.7781 | 701.71 | 2 ##### | 2.68 | 0.35 |
| RIVAATLSDPELFKE      | 1403.7781 | 701.68 | 2 ##### | 2.97 | 0.42 |
| RIYELAAGGTAVGTGLNTRI | 1763.9286 | 881.75 | 2 ##### | 2.77 | 0.44 |
| RIYELAAGGTAVGTGLNTRI | 1763.9286 | 881.71 | 2 ##### | 3.88 | 0.52 |
| RIYELAAGGTAVGTGLNTRI | 1763.9286 | 881.71 | 2 ##### | 3.93 | 0.52 |
| RIYVGNLPPDIRT        | 1256.6997 | 628.15 | 2 ##### | 2.78 | 0.40 |
| RIYVGNLPPDIRT        | 1256.6997 | 628.18 | 2 ##### | 2.84 | 0.35 |
| RIYVGNLPPDIRT        | 1256.6997 | 628.17 | 2 ##### | 3.06 | 0.36 |
| RKADIDLTERA          | 1060.5634 | 530.13 | 2 ##### | 2.60 | 0.30 |
| RKADIDLTERA          | 1060.5634 | 530.14 | 2 ##### | 2.67 | 0.29 |
| RKADIDLTERA          | 1060.5634 | 530.16 | 2 ##### | 2.76 | 0.25 |
| RKADIDLTERA          | 1060.5634 | 530.11 | 2 ##### | 2.79 | 0.34 |
| RKADIDLTERA          | 1060.5634 | 530.12 | 2 ##### | 2.90 | 0.33 |
| RKASGPPVSELITKA      | 1326.7627 | 663.23 | 2 ##### | 2.84 | 0.31 |
| RKASGPPVSELITKA      | 1326.7627 | 663.15 | 2 ##### | 3.04 | 0.47 |
| RKASGPPVSELITKA      | 1326.7627 | 663.12 | 2 ##### | 3.22 | 0.51 |
| RKASGPPVSELITKA      | 1326.7627 | 663.14 | 2 ##### | 3.66 | 0.49 |
| RKASGPPVSELITKA      | 1326.7627 | 663.13 | 2 ##### | 3.66 | 0.51 |
| RKASGPPVSELITKA      | 1326.7627 | 663.13 | 2 ##### | 3.75 | 0.50 |
| RKASGPPVSELITKA      | 1326.7627 | 663.10 | 2 ##### | 3.84 | 0.57 |
| RKDHPFGFVAVPTKN      | 1442.7791 | 480.78 | 3 ##### | 3.00 | 0.43 |
| RKDHPFGFVAVPTKN      | 1442.7791 | 480.75 | 3 ##### | 3.47 | 0.52 |
| RKDHPFGFVAVPTKN      | 1442.7791 | 480.71 | 3 ##### | 3.97 | 0.64 |
| RKEFSPFGTITSAKV      | 1412.7421 | 706.20 | 2 ##### | 2.99 | 0.33 |
| RKEFSPFGTITSAKV      | 1412.7421 | 706.22 | 2 ##### | 3.15 | 0.31 |
| RKEFSPFGTITSAKV      | 1412.7421 | 706.21 | 2 ##### | 3.20 | 0.32 |
| RKISSDLDGHPVPKQ      | 1392.7482 | 696.15 | 2 ##### | 2.51 | 0.44 |
| RKISSDLDGHPVPKQ      | 1392.7482 | 696.13 | 2 ##### | 3.07 | 0.50 |
| RKISSDLDGHPVPKQ      | 1392.7482 | 696.11 | 2 ##### | 3.35 | 0.53 |
| RKISSDLDGHPVPKQ      | 1392.7482 | 696.13 | 2 ##### | 3.41 | 0.49 |
| RKPLLESGTLGTKG       | 1243.7256 | 621.65 | 2 ##### | 2.74 | 0.42 |
| RKPLLESGTLGTKG       | 1243.7256 | 621.62 | 2 ##### | 2.75 | 0.48 |
| RKPLLESGTLGTKG       | 1243.7256 | 621.60 | 2 ##### | 2.86 | 0.52 |
| RKPLLESGTLGTKG       | 1243.7256 | 621.67 | 2 ##### | 2.88 | 0.38 |
| RKPLLESGTLGTKG       | 1243.7256 | 621.65 | 2 ##### | 2.91 | 0.43 |
| RKPLLESGTLGTKG       | 1243.7256 | 621.62 | 2 ##### | 3.10 | 0.49 |
| RLAAIQESGVERQ        | 1172.6270 | 586.09 | 2 ##### | 3.10 | 0.44 |
| RLAAIQESGVERQ        | 1172.6270 | 586.12 | 2 ##### | 3.26 | 0.38 |
| RLAAIQESGVERQ        | 1172.6270 | 586.09 | 2 ##### | 3.30 | 0.44 |

|                          |           |         |         |      |      |
|--------------------------|-----------|---------|---------|------|------|
| RLAAIQESGVERQ            | 1172.6270 | 586.12  | 2 ##### | 3.32 | 0.39 |
| RLAGNEQVTRD              | 987.5218  | 493.66  | 2 ##### | 3.02 | 0.20 |
| RLAGTQPLEVLEAVQRS        | 1623.9065 | 811.77  | 2 ##### | 2.84 | 0.38 |
| RLAGTQPLEVLEAVQRS        | 1623.9065 | 811.72  | 2 ##### | 3.69 | 0.47 |
| RLAGTQPLEVLEAVQRS        | 1623.9065 | 811.68  | 2 ##### | 4.02 | 0.54 |
| RLAGTQPLEVLEAVQRS        | 1623.9065 | 811.68  | 2 ##### | 4.49 | 0.54 |
| RLAPDYDALDVANKI          | 1404.7006 | 702.14  | 2 ##### | 3.21 | 0.42 |
| RLAPDYDALDVANKI          | 1404.7006 | 702.20  | 2 ##### | 3.22 | 0.30 |
| RLAPDYDALDVANKI          | 1404.7006 | 702.16  | 2 ##### | 3.41 | 0.38 |
| RLAPDYDALDVANKI          | 1404.7006 | 702.16  | 2 ##### | 3.41 | 0.39 |
| RLAPDYDALDVANKI          | 1404.7006 | 702.16  | 2 ##### | 3.46 | 0.39 |
| RLAPDYDALDVANKI          | 1404.7006 | 702.13  | 2 ##### | 3.61 | 0.45 |
| RLAPITSDPTEAAAVGAVEASFKC | 2145.1074 | 714.92  | 3 ##### | 3.26 | 0.35 |
| RLAPITSDPTEAAAVGAVEASFKC | 2145.1074 | 1072.25 | 2 ##### | 4.01 | 0.60 |
| RLAPITSDPTEAAAVGAVEASFKC | 2145.1074 | 1072.23 | 2 ##### | 4.13 | 0.65 |
| RLAPITSDPTEAAAVGAVEASFKC | 2145.1074 | 1072.23 | 2 ##### | 4.52 | 0.65 |
| RLAPITSDPTEAAAVGAVEASFKC | 2145.1074 | 1072.23 | 2 ##### | 5.02 | 0.65 |
| RLASQANIAQVLAELKE        | 1568.9006 | 784.18  | 2 ##### | 3.69 | 0.54 |
| RLAYINPDALALEEKN         | 1488.7944 | 744.33  | 2 ##### | 2.97 | 0.13 |
| RLAYINPDALALEEKN         | 1488.7944 | 744.34  | 2 ##### | 3.14 | 0.12 |
| RLAYINPDALALEEKN         | 1488.7944 | 744.28  | 2 ##### | 3.15 | 0.24 |
| RLAYINPDALALEEKN         | 1488.7944 | 744.28  | 2 ##### | 3.23 | 0.24 |
| RLAYINPDALALEEKN         | 1488.7944 | 744.26  | 2 ##### | 3.38 | 0.28 |
| RLAYINPDALALEEKN         | 1488.7944 | 744.20  | 2 ##### | 3.59 | 0.39 |
| RLAYINPDALALEEKN         | 1488.7944 | 744.23  | 2 ##### | 3.71 | 0.34 |
| RLAYINPDALALEEKN         | 1488.7944 | 744.24  | 2 ##### | 4.00 | 0.31 |
| RLDGLVDTPPTYIESLPKV      | 1817.9531 | 908.73  | 2 ##### | 3.15 | 0.50 |
| RLDGLVDTPPTYIESLPKV      | 1817.9531 | 908.74  | 2 ##### | 3.20 | 0.47 |
| RLDGLVDTPPTYIESLPKV      | 1817.9531 | 908.73  | 2 ##### | 3.41 | 0.49 |
| RLDGLVDTPPTYIESLPKV      | 1817.9531 | 908.76  | 2 ##### | 3.66 | 0.43 |
| RLDGLVDTPPTYIESLPKV      | 1817.9531 | 908.70  | 2 ##### | 3.90 | 0.55 |
| RLDGLVDTPPTYIESLPKV      | 1817.9531 | 908.71  | 2 ##### | 3.96 | 0.54 |
| RLDGLVDTPPTYIESLPKV      | 1817.9531 | 908.71  | 2 ##### | 4.07 | 0.54 |
| RLDGLVDTPPTYIESLPKV      | 1817.9531 | 908.73  | 2 ##### | 4.12 | 0.49 |
| RLDIDSAPITARN            | 1171.6317 | 585.67  | 2 ##### | 2.62 | 0.28 |
| RLDIDSAPITARN            | 1171.6317 | 585.68  | 2 ##### | 2.69 | 0.27 |
| RLDIDSAPITARN            | 1171.6317 | 585.71  | 2 ##### | 2.74 | 0.22 |
| RLDIDSAPITARN            | 1171.6317 | 585.60  | 2 ##### | 2.96 | 0.43 |
| RLDIDSAPITARN            | 1171.6317 | 585.58  | 2 ##### | 3.08 | 0.47 |
| RLDIDSAPITARN            | 1171.6317 | 585.62  | 2 ##### | 3.16 | 0.39 |
| RLDIDSAPITARN            | 1171.6317 | 585.63  | 2 ##### | 3.21 | 0.38 |
| RLDLDLTSDSQPPVFKV        | 1674.8585 | 837.37  | 2 ##### | 2.76 | 0.12 |
| RLDLDLTSDSQPPVFKV        | 1674.8585 | 837.25  | 2 ##### | 2.81 | 0.35 |
| RLDLDLTSDSQPPVFKV        | 1674.8585 | 837.16  | 2 ##### | 3.63 | 0.54 |
| RLDLDLTSDSQPPVFKV        | 1674.8585 | 837.16  | 2 ##### | 3.63 | 0.54 |
| RLDLDLTSDSQPPVFKV        | 1674.8585 | 837.15  | 2 ##### | 3.91 | 0.56 |
| RLDQLIYIPLPDEKS          | 1556.8571 | 778.22  | 2 ##### | 3.40 | 0.41 |
| RLDQLIYIPLPDEKS          | 1556.8571 | 778.23  | 2 ##### | 3.46 | 0.40 |
| RLDQLIYIPLPDEKS          | 1556.8571 | 778.24  | 2 ##### | 3.81 | 0.38 |
| RLDQLIYIPLPDEKS          | 1556.8571 | 778.24  | 2 ##### | 4.01 | 0.37 |
| RLDQLIYIPLPDEKS          | 1556.8571 | 778.25  | 2 ##### | 4.04 | 0.36 |
| RLDQLIYIPLPDEKS          | 1556.8571 | 778.21  | 2 ##### | 4.14 | 0.43 |
| RLDTDDLDEIEKI            | 1305.6056 | 652.63  | 2 ##### | 2.92 | 0.35 |
| RLDTSEVVFNTKQ            | 1252.6420 | 626.09  | 2 ##### | 2.88 | 0.46 |
| RLDTSEVVFNTKQ            | 1252.6420 | 626.09  | 2 ##### | 2.96 | 0.46 |
| RLDTSEVVFNTKQ            | 1252.6420 | 626.10  | 2 ##### | 3.12 | 0.44 |



|                     |           |        |         |      |      |
|---------------------|-----------|--------|---------|------|------|
| RLDTSEVVFNTKQ       | 1252.6420 | 626.07 | 2 ##### | 3.42 | 0.51 |
| RLEGGSGGDSEVQRT     | 1290.5920 | 645.06 | 2 ##### | 3.15 | 0.47 |
| RLEQYTNAIEGTKA      | 1366.6849 | 683.24 | 2 ##### | 2.91 | 0.20 |
| RLEQYTNAIEGTKA      | 1366.6849 | 683.14 | 2 ##### | 3.17 | 0.40 |
| RLEQYTNAIEGTKA      | 1366.6849 | 683.08 | 2 ##### | 3.29 | 0.52 |
| RLEQYTNAIEGTKA      | 1366.6849 | 683.09 | 2 ##### | 3.32 | 0.51 |
| RLESEEEGVPSTAIRE    | 1516.7489 | 758.32 | 2 ##### | 2.66 | 0.10 |
| RLESEEEGVPSTAIRE    | 1516.7489 | 758.28 | 2 ##### | 2.99 | 0.20 |
| RLFVGNLNPADITEDEFKR | 1807.9113 | 903.81 | 2 ##### | 2.93 | 0.29 |
| RLFVGNLNPADITEDEFKR | 1807.9113 | 903.75 | 2 ##### | 3.02 | 0.41 |
| RLFVGNLNPADITEDEFKR | 1807.9113 | 903.74 | 2 ##### | 3.41 | 0.43 |
| RLGAAPEEESAYVAGERR  | 1648.7813 | 824.16 | 2 ##### | 3.43 | 0.46 |
| RLGAAPEEESAYVAGERR  | 1648.7813 | 824.10 | 2 ##### | 3.89 | 0.58 |
| RLGAAPEEESAYVAGERR  | 1648.7813 | 824.06 | 2 ##### | 3.97 | 0.66 |
| RLGAAPEEESAYVAGERR  | 1648.7813 | 824.08 | 2 ##### | 3.98 | 0.63 |
| RLGAAPEEESAYVAGERR  | 1648.7813 | 824.05 | 2 ##### | 4.07 | 0.68 |
| RLGAAPEEESAYVAGERR  | 1648.7813 | 824.08 | 2 ##### | 4.08 | 0.61 |
| RLGAAPEEESAYVAGERR  | 1648.7813 | 824.06 | 2 ##### | 4.43 | 0.66 |
| RLGHAEQKDEMVPRL     | 1525.7472 | 762.63 | 2 ##### | 2.99 | 0.49 |
| RLGHAEQKDEMVPRL     | 1525.7472 | 762.65 | 2 ##### | 3.34 | 0.45 |
| RLGHAEQKDEMVPRL     | 1525.7472 | 762.61 | 2 ##### | 3.41 | 0.54 |
| RLGHAEQKDEMVPRL     | 1525.7472 | 762.66 | 2 ##### | 3.47 | 0.43 |
| RLGNDFHTNKRV        | 1201.6073 | 600.67 | 2 ##### | 2.91 | 0.26 |
| RLGNDFHTNKRV        | 1201.6073 | 600.62 | 2 ##### | 3.02 | 0.37 |
| RLGNDFHTNKRV        | 1201.6073 | 600.64 | 2 ##### | 3.04 | 0.34 |
| RLGSTVVFVANLDYKV    | 1426.7577 | 713.12 | 2 ##### | 3.03 | 0.52 |
| RLLDEEEATDNDLRA     | 1532.7075 | 766.17 | 2 ##### | 3.02 | 0.38 |
| RLLLINNAATLGDVSKG   | 1541.8898 | 770.70 | 2 ##### | 3.08 | 0.50 |
| RLLLINNAATLGDVSKG   | 1541.8898 | 770.67 | 2 ##### | 3.18 | 0.56 |
| RLLVPTQYVGAIIGKE    | 1471.8883 | 735.74 | 2 ##### | 2.76 | 0.41 |
| RLLVPTQYVGAIIGKE    | 1471.8883 | 735.70 | 2 ##### | 2.85 | 0.49 |
| RLLVPTQYVGAIIGKE    | 1471.8883 | 735.68 | 2 ##### | 3.38 | 0.52 |
| RLLVPTQYVGAIIGKE    | 1471.8883 | 735.68 | 2 ##### | 3.46 | 0.53 |
| RLLVPTQYVGAIIGKE    | 1471.8883 | 735.68 | 2 ##### | 3.85 | 0.54 |
| RLNFSHGTHEYHAETIKN  | 1883.9034 | 627.83 | 3 ##### | 3.10 | 0.41 |
| RLNFSHGTHEYHAETIKN  | 1883.9034 | 941.74 | 2 ##### | 3.19 | 0.42 |
| RLNFSHGTHEYHAETIKN  | 1883.9034 | 627.84 | 3 ##### | 3.55 | 0.38 |
| RLNFSHGTHEYHAETIKN  | 1883.9034 | 627.82 | 3 ##### | 3.69 | 0.45 |
| RLNFSHGTHEYHAETIKN  | 1883.9034 | 627.84 | 3 ##### | 3.75 | 0.40 |
| RLNFSHGTHEYHAETIKN  | 1883.9034 | 941.73 | 2 ##### | 3.96 | 0.44 |
| RLNFSHGTHEYHAETIKN  | 1883.9034 | 627.83 | 3 ##### | 4.10 | 0.41 |
| RLNFSHGTHEYHAETIKN  | 1883.9034 | 941.73 | 2 ##### | 4.14 | 0.45 |
| RLNFSHGTHEYHAETIKN  | 1883.9034 | 941.69 | 2 ##### | 4.63 | 0.51 |
| RLPPNTNDEVDEDPTGNKA | 1854.8352 | 927.19 | 2 ##### | 2.58 | 0.46 |
| RLPPNTNDEVDEDPTGNKA | 1854.8352 | 927.16 | 2 ##### | 2.61 | 0.51 |
| RLPPNTNDEVDEDPTGNKA | 1854.8352 | 927.10 | 2 ##### | 3.10 | 0.63 |
| RLYGPSSVSFADDFVRS   | 1659.8013 | 829.62 | 2 ##### | 3.93 | 0.56 |
| RLYGPSSVSFADDFVRS   | 1659.8013 | 829.61 | 2 ##### | 4.14 | 0.58 |
| RLYGPSSVSFADDFVRS   | 1659.8013 | 829.60 | 2 ##### | 4.50 | 0.60 |
| RLYGPSSVSFADDFVRS   | 1659.8013 | 829.60 | 2 ##### | 4.73 | 0.60 |
| RNAAQVLVGIPLETGQKQ  | 1637.9221 | 818.73 | 2 ##### | 2.62 | 0.47 |
| RNAAQVLVGIPLETGQKQ  | 1637.9221 | 818.70 | 2 ##### | 3.15 | 0.52 |
| RNDEELNKLLGRV       | 1300.6855 | 650.20 | 2 ##### | 2.72 | 0.28 |
| RNDEELNKLLGRV       | 1300.6855 | 650.16 | 2 ##### | 2.74 | 0.36 |
| RNDEELNKLLGRV       | 1300.6855 | 650.19 | 2 ##### | 2.82 | 0.31 |
| RNDEELNKLLGRV       | 1300.6855 | 650.22 | 2 ##### | 2.88 | 0.25 |

|                      |           |        |         |      |      |
|----------------------|-----------|--------|---------|------|------|
| RNDEELNKLLGRV        | 1300.6855 | 650.19 | 2 ##### | 3.11 | 0.30 |
| RNDEELNKLLGRV        | 1300.6855 | 650.19 | 2 ##### | 3.19 | 0.31 |
| RNDEELNKLLGRV        | 1300.6855 | 650.17 | 2 ##### | 3.19 | 0.36 |
| RNDEELNKLLGRV        | 1300.6855 | 650.14 | 2 ##### | 3.31 | 0.41 |
| RNEEDATELVGLAQAVNARS | 1899.9407 | 633.15 | 3 ##### | 3.11 | 0.48 |
| RNEEDATELVGLAQAVNARS | 1899.9407 | 633.18 | 3 ##### | 3.17 | 0.40 |
| RNEEDATELVGLAQAVNARS | 1899.9407 | 633.14 | 3 ##### | 3.32 | 0.51 |
| RNEEDATELVGLAQAVNARS | 1899.9407 | 949.89 | 2 ##### | 3.36 | 0.16 |
| RNEEDATELVGLAQAVNARS | 1899.9407 | 949.66 | 2 ##### | 4.40 | 0.62 |
| RNEEDATELVGLAQAVNARS | 1899.9407 | 949.66 | 2 ##### | 4.84 | 0.62 |
| RNEEDATELVGLAQAVNARS | 1899.9407 | 949.69 | 2 ##### | 5.21 | 0.56 |
| RNEEDATELVGLAQAVNARS | 1899.9407 | 949.69 | 2 ##### | 5.51 | 0.57 |
| RNELESYAYSCLKN       | 1316.6368 | 658.11 | 2 ##### | 2.59 | 0.41 |
| RNELESYAYSCLKN       | 1316.6368 | 658.10 | 2 ##### | 2.85 | 0.44 |
| RNELESYAYSCLKN       | 1316.6368 | 658.14 | 2 ##### | 2.91 | 0.36 |
| RNELESYAYSCLKN       | 1316.6368 | 658.15 | 2 ##### | 2.91 | 0.33 |
| RNFILDQTNVSAQAQR     | 1647.8450 | 823.74 | 2 ##### | 2.68 | 0.36 |
| RNFILDQTNVSAQAQR     | 1647.8450 | 823.73 | 2 ##### | 3.01 | 0.39 |
| RNFILDQTNVSAQAQR     | 1647.8450 | 823.71 | 2 ##### | 4.29 | 0.43 |
| RNFILDQTNVSAQAQR     | 1647.8450 | 823.66 | 2 ##### | 4.46 | 0.52 |
| RNFILDQTNVSAQAQR     | 1647.8450 | 823.66 | 2 ##### | 4.69 | 0.52 |
| RNFILDQTNVSAQAQR     | 1647.8450 | 823.68 | 2 ##### | 4.86 | 0.49 |
| RNFILDQTNVSAQAQR     | 1647.8450 | 823.66 | 2 ##### | 4.93 | 0.53 |
| RNFILDQTNVSAQAQR     | 1647.8450 | 823.70 | 2 ##### | 5.00 | 0.45 |
| RNFILDQTNVSAQAQR     | 1647.8450 | 823.68 | 2 ##### | 5.45 | 0.48 |
| RNFLASQVPFPSRL       | 1362.7164 | 681.24 | 2 ##### | 2.76 | 0.24 |
| RNFLASQVPFPSRL       | 1362.7164 | 681.21 | 2 ##### | 3.32 | 0.31 |
| RNFLASQVPFPSRL       | 1362.7164 | 681.16 | 2 ##### | 3.50 | 0.40 |
| RNFLASQVPFPSRL       | 1362.7164 | 681.16 | 2 ##### | 3.51 | 0.39 |
| RNFLASQVPFPSRL       | 1362.7164 | 681.17 | 2 ##### | 3.60 | 0.38 |
| RNIIHGSDSVESAKE      | 1485.7180 | 742.70 | 2 ##### | 3.10 | 0.33 |
| RNIIHGSDSVESAKE      | 1485.7180 | 742.68 | 2 ##### | 3.43 | 0.36 |
| RNIIHGSDSVESAKE      | 1485.7180 | 742.65 | 2 ##### | 3.78 | 0.43 |
| RNIIHGSDSVESAKE      | 1485.7180 | 742.64 | 2 ##### | 3.88 | 0.44 |
| RNLANTVTEEILEKS      | 1473.7795 | 736.77 | 2 ##### | 2.60 | 0.24 |
| RNLANTVTEEILEKS      | 1473.7795 | 736.80 | 2 ##### | 2.65 | 0.17 |
| RNLATTVTEEILEKS      | 1460.7843 | 730.16 | 2 ##### | 3.71 | 0.46 |
| RNLATTVTEEILEKS      | 1460.7843 | 730.22 | 2 ##### | 3.75 | 0.35 |
| RNLATTVTEEILEKS      | 1460.7843 | 730.19 | 2 ##### | 3.82 | 0.40 |
| RNLATTVTEEILEKS      | 1460.7843 | 730.21 | 2 ##### | 3.83 | 0.36 |
| RNNLAGAEELFARK       | 1304.6593 | 652.13 | 2 ##### | 3.35 | 0.40 |
| RNNLAGAEELFARK       | 1304.6593 | 652.15 | 2 ##### | 3.46 | 0.35 |
| RNNLAGAEELFARK       | 1304.6593 | 652.12 | 2 ##### | 3.62 | 0.41 |
| RNNLAGAEELFARK       | 1304.6593 | 652.13 | 2 ##### | 3.67 | 0.39 |
| RNPDDITNEEYGEFYKS    | 1833.7814 | 916.81 | 2 ##### | 2.55 | 0.16 |
| RNPDDITNEEYGEFYKS    | 1833.7814 | 916.80 | 2 ##### | 2.89 | 0.19 |
| RNPDDITNEEYGEFYKS    | 1833.7814 | 916.61 | 2 ##### | 3.14 | 0.56 |
| RNPDDITNEEYGEFYKS    | 1833.7814 | 916.66 | 2 ##### | 3.33 | 0.46 |
| RNPDDITNEEYGEFYKS    | 1833.7814 | 916.64 | 2 ##### | 3.39 | 0.50 |
| RNPDDITNEEYGEFYKS    | 1833.7814 | 916.61 | 2 ##### | 3.50 | 0.56 |
| RNPDDITNEEYGEFYKS    | 1833.7814 | 916.61 | 2 ##### | 4.57 | 0.56 |
| RNPDDITNEEYGEFYKS    | 1833.7814 | 916.60 | 2 ##### | 4.77 | 0.58 |
| RNPDDITNEEYGEFYKS    | 1833.7814 | 916.60 | 2 ##### | 4.92 | 0.59 |
| RNPDDITNEEYGEFYKS    | 1833.7814 | 916.63 | 2 ##### | 5.17 | 0.52 |
| RNPDDITNEEYGEFYKS    | 1833.7814 | 916.61 | 2 ##### | 5.32 | 0.57 |
| RNPDDITNEEYGEFYKS    | 1833.7814 | 916.64 | 2 ##### | 5.34 | 0.51 |

|                             |           |        |         |      |      |
|-----------------------------|-----------|--------|---------|------|------|
| RNPDDITNEEYGEFYKS           | 1833.7814 | 916.61 | 2 ##### | 5.44 | 0.55 |
| RNPDDITQEEYGEFYKS           | 1847.7970 | 923.72 | 2 ##### | 2.74 | 0.36 |
| RNPDDITQEEYGEFYKS           | 1847.7970 | 923.65 | 2 ##### | 3.45 | 0.49 |
| RNPDDITQEEYGEFYKS           | 1847.7970 | 923.68 | 2 ##### | 3.89 | 0.44 |
| RNPDDITQEEYGEFYKS           | 1847.7970 | 923.61 | 2 ##### | 4.29 | 0.58 |
| RNPDDITQEEYGEFYKS           | 1847.7970 | 923.61 | 2 ##### | 4.54 | 0.57 |
| RNPDDITQEEYGEFYKS           | 1847.7970 | 923.60 | 2 ##### | 4.74 | 0.60 |
| RNPDDITQEEYGEFYKS           | 1847.7970 | 923.59 | 2 ##### | 4.87 | 0.62 |
| RNPDDITQEEYGEFYKS           | 1847.7970 | 923.60 | 2 ##### | 4.91 | 0.59 |
| RNPDDITQEEYGEFYKS           | 1847.7970 | 923.60 | 2 ##### | 4.93 | 0.60 |
| RNPDDITQEEYGEFYKS           | 1847.7970 | 923.58 | 2 ##### | 4.95 | 0.64 |
| RNPDDITQEEYGEFYKS           | 1847.7970 | 923.63 | 2 ##### | 5.09 | 0.54 |
| RNPDDITQEEYGEFYKS           | 1847.7970 | 923.60 | 2 ##### | 5.15 | 0.60 |
| RNPDDITQEEYGEFYKS           | 1847.7970 | 923.60 | 2 ##### | 5.56 | 0.59 |
| RNPDDITQEEYGEFYKS           | 1847.7970 | 923.60 | 2 ##### | 5.56 | 0.60 |
| RNPDDITQEEYGEFYKS           | 1847.7970 | 923.59 | 2 ##### | 5.80 | 0.62 |
| RNPDDITQEEYGEFYKS           | 1847.7970 | 923.60 | 2 ##### | 5.82 | 0.60 |
| RNPQNSSQSADGLRC             | 1373.6404 | 686.59 | 2 ##### | 2.69 | 0.46 |
| RNPQNSSQSADGLRC             | 1373.6404 | 686.57 | 2 ##### | 2.84 | 0.51 |
| RNPQNSSQSADGLRC             | 1373.6404 | 686.62 | 2 ##### | 3.04 | 0.41 |
| RNPQNSSQSADGLRC             | 1373.6404 | 686.58 | 2 ##### | 3.11 | 0.48 |
| RNQQGGYGGSSSSSYGSGRR        | 1694.7001 | 847.01 | 2 ##### | 3.98 | 0.69 |
| RNQQGGYGGSSSSSYGSGRR        | 1694.7001 | 847.01 | 2 ##### | 4.04 | 0.68 |
| RNQQGGYGGSSSSSYGSGRR        | 1694.7001 | 847.03 | 2 ##### | 4.08 | 0.64 |
| RNQQGGYGGSSSSSYGSGRR        | 1694.7001 | 847.02 | 2 ##### | 4.26 | 0.67 |
| RNQQGGYGGSSSSSYGSGRR        | 1694.7001 | 847.02 | 2 ##### | 4.36 | 0.66 |
| RNRPPLAAGANSKG              | 1195.6542 | 597.63 | 2 ##### | 2.56 | 0.39 |
| RPALELLEPIEQKF              | 1379.7781 | 689.67 | 2 ##### | 3.08 | 0.43 |
| RPGDGGSLGSGARS              | 1030.4912 | 515.06 | 2 ##### | 3.30 | 0.38 |
| RPSQVVAETRK                 | 986.5266  | 493.18 | 2 ##### | 2.66 | 0.16 |
| RQEMQEVQSSRS                | 1221.5529 | 610.55 | 2 ##### | 2.53 | 0.45 |
| RQEMQEVQSSRS                | 1221.5529 | 610.64 | 2 ##### | 2.65 | 0.28 |
| RQPSLHMSAAAASRD             | 1326.6583 | 663.15 | 2 ##### | 2.58 | 0.36 |
| RQPSLHMSAAAASRD             | 1326.6583 | 663.11 | 2 ##### | 2.90 | 0.44 |
| RQPSLHMSAAAASRD             | 1326.6583 | 663.11 | 2 ##### | 3.01 | 0.43 |
| RRAPAAQPPAAAAPSAVGSPPAAAPRC | 2153.1575 | 717.53 | 3 ##### | 3.76 | 0.57 |
| RRAPAAQPPAAAAPSAVGSPPAAAPRC | 2153.1575 | 717.53 | 3 ##### | 3.89 | 0.56 |
| RRAPFDLFENKK                | 1236.6372 | 618.19 | 2 ##### | 2.54 | 0.26 |
| RRAPFDLFENKK                | 1236.6372 | 618.17 | 2 ##### | 2.89 | 0.30 |
| RRAPFDLFENKK                | 1236.6372 | 618.13 | 2 ##### | 2.91 | 0.38 |
| RRAPFDLFENKK                | 1236.6372 | 618.12 | 2 ##### | 2.99 | 0.39 |
| RRAPFDLFENRK                | 1264.6433 | 632.15 | 2 ##### | 2.57 | 0.34 |
| RRAPFDLFENRK                | 1264.6433 | 632.19 | 2 ##### | 2.80 | 0.27 |
| RRAPFDLFENRK                | 1264.6433 | 632.10 | 2 ##### | 3.02 | 0.43 |
| RRAPFDLFENRK                | 1264.6433 | 632.11 | 2 ##### | 3.12 | 0.42 |
| RRAPFDLFENRK                | 1264.6433 | 632.10 | 2 ##### | 3.15 | 0.44 |
| RRAPFDLFENRK                | 1264.6433 | 632.11 | 2 ##### | 3.22 | 0.42 |
| RRAPFDLFENRK                | 1264.6433 | 632.10 | 2 ##### | 3.23 | 0.44 |
| RRAPFDLFENRK                | 1264.6433 | 632.10 | 2 ##### | 3.45 | 0.44 |
| RRHVFGESEDELIGQKV           | 1614.8235 | 538.11 | 3 ##### | 3.23 | 0.50 |
| RRHVFGESEDELIGQKV           | 1614.8235 | 538.11 | 3 ##### | 3.35 | 0.49 |
| RRHVFGESEDELIGQKV           | 1614.8235 | 538.09 | 3 ##### | 3.57 | 0.56 |
| RRHVFGESEDELIGQKV           | 1614.8235 | 538.09 | 3 ##### | 4.66 | 0.56 |
| RRPDQQLQGDGKL               | 1241.6233 | 620.54 | 2 ##### | 2.65 | 0.54 |
| RRPDQQLQGDGKL               | 1241.6233 | 620.59 | 2 ##### | 2.83 | 0.45 |
| RRPDQQLQGDGKL               | 1241.6233 | 620.53 | 2 ##### | 3.15 | 0.57 |

|                           |           |        |         |      |      |
|---------------------------|-----------|--------|---------|------|------|
| RRQVDQLTNDKA              | 1216.6281 | 608.18 | 2 ##### | 2.72 | 0.27 |
| RRQVDQLTNDKA              | 1216.6281 | 608.20 | 2 ##### | 3.15 | 0.23 |
| RRQVDQLTNDKA              | 1216.6281 | 608.15 | 2 ##### | 3.18 | 0.33 |
| RRVYATILNAGTNTDGSKE       | 1780.9188 | 890.40 | 2 ##### | 2.62 | 0.11 |
| RSAAESISESVPVGPVKV        | 1457.7482 | 728.60 | 2 ##### | 3.17 | 0.55 |
| RSAAESISESVPVGPVKV        | 1457.7482 | 728.56 | 2 ##### | 3.23 | 0.64 |
| RSAAESISESVPVGPVKV        | 1457.7482 | 728.64 | 2 ##### | 3.29 | 0.47 |
| RSAAESISESVPVGPVKV        | 1457.7482 | 728.63 | 2 ##### | 3.54 | 0.49 |
| RSIYGEEFEDENFILKH         | 1832.8589 | 916.15 | 2 ##### | 5.44 | 0.55 |
| RSKVDEAVAVLQAHQAKE        | 1693.9232 | 564.46 | 3 ##### | 3.92 | 0.53 |
| RSKVDEAVAVLQAHQAKE        | 1693.9232 | 564.47 | 3 ##### | 4.14 | 0.52 |
| RSLDLDSIIAEVKA            | 1302.7151 | 651.18 | 2 ##### | 2.80 | 0.36 |
| RSLDLDSIIAEVKA            | 1302.7151 | 651.17 | 2 ##### | 2.85 | 0.37 |
| RSLDLDSIIAEVKA            | 1302.7151 | 651.26 | 2 ##### | 3.44 | 0.19 |
| RSLDLDSIIAEVKA            | 1302.7151 | 651.13 | 2 ##### | 3.71 | 0.46 |
| RSLDLDSIIAEVKA            | 1302.7151 | 651.14 | 2 ##### | 3.85 | 0.43 |
| RSLFSSIGEVEESAKL          | 1353.6897 | 676.57 | 2 ##### | 3.13 | 0.55 |
| RSLFSSIGEVEESAKL          | 1353.6897 | 676.55 | 2 ##### | 3.35 | 0.58 |
| RSLFSSIGEVEESAKL          | 1353.6897 | 676.56 | 2 ##### | 3.35 | 0.56 |
| RSLFSSIGEVEESAKL          | 1353.6897 | 676.60 | 2 ##### | 3.52 | 0.48 |
| RSLFSSIGEVEESAKL          | 1353.6897 | 676.61 | 2 ##### | 3.66 | 0.48 |
| RSQLLGSAAHEVQRF           | 1324.6968 | 662.14 | 2 ##### | 2.74 | 0.42 |
| RSQNVMAAASIANIVKS         | 1532.8146 | 766.28 | 2 ##### | 3.14 | 0.25 |
| RSQNVMAAASIANIVKS         | 1532.8146 | 766.15 | 2 ##### | 4.15 | 0.52 |
| RSQNVMAAASIANIVKS         | 1532.8146 | 766.16 | 2 ##### | 4.82 | 0.50 |
| RSSFFVNGLTLLGGQKC         | 1454.7638 | 727.16 | 2 ##### | 2.97 | 0.44 |
| RSSFFVNGLTLLGGQKC         | 1454.7638 | 727.13 | 2 ##### | 3.76 | 0.51 |
| RSSGSPYGGGYGSGGGSGGGYGSRR | 1910.7899 | 955.05 | 2 ##### | 4.71 | 0.69 |
| RSSGSPYGGGYGSGGGSGGGYGSRR | 1910.7899 | 955.07 | 2 ##### | 4.97 | 0.65 |
| RSSGSPYGGGYGSGGGSGGGYGSRR | 1910.7899 | 955.05 | 2 ##### | 5.14 | 0.68 |
| RSSGSPYGGGYGSGGGSGGGYGSRR | 1910.7899 | 955.07 | 2 ##### | 5.27 | 0.65 |
| RSTGEAFVQFASQEIAEKA       | 1841.8916 | 920.73 | 2 ##### | 3.09 | 0.44 |
| RSTGEAFVQFASQEIAEKA       | 1841.8916 | 920.80 | 2 ##### | 3.27 | 0.29 |
| RSTGEAFVQFASQEIAEKA       | 1841.8916 | 920.73 | 2 ##### | 3.40 | 0.44 |
| RSTGEAFVQFASQEIAEKA       | 1841.8916 | 920.70 | 2 ##### | 4.14 | 0.48 |
| RSTGEAFVQFASQEIAEKA       | 1841.8916 | 920.69 | 2 ##### | 4.42 | 0.51 |
| RSTGEAFVQFASQEIAEKA       | 1841.8916 | 920.65 | 2 ##### | 4.72 | 0.59 |
| RSTGEAFVQFASQEIAEKA       | 1841.8916 | 920.66 | 2 ##### | 4.76 | 0.58 |
| RSTGEAFVQFASQEIAEKA       | 1841.8916 | 920.69 | 2 ##### | 4.91 | 0.52 |
| RSTGEAFVQFASQEIAEKA       | 1841.8916 | 920.67 | 2 ##### | 5.12 | 0.55 |
| RSTGEAFVQFASQEIAEKA       | 1841.8916 | 920.65 | 2 ##### | 5.13 | 0.60 |
| RSTGEAFVQFASQEIAEKA       | 1841.8916 | 920.65 | 2 ##### | 5.22 | 0.59 |
| RSTGEAFVQFASQEIAEKA       | 1841.8916 | 920.64 | 2 ##### | 5.23 | 0.60 |
| RSTGEAFVQFASQEIAEKA       | 1841.8916 | 920.65 | 2 ##### | 5.30 | 0.60 |
| RSTGEAFVQFASQEIAEKA       | 1841.8916 | 920.66 | 2 ##### | 5.39 | 0.58 |
| RSVGDGETVEFDVVEGEKG       | 1795.8232 | 897.64 | 2 ##### | 3.23 | 0.54 |
| RSVGDGETVEFDVVEGEKG       | 1795.8232 | 897.65 | 2 ##### | 3.30 | 0.53 |
| RSVGDGETVEFDVVEGEKG       | 1795.8232 | 897.67 | 2 ##### | 3.45 | 0.48 |
| RSVTQQPGSEVIAPQKT         | 1568.8279 | 784.25 | 2 ##### | 2.81 | 0.33 |
| RSVTQQPGSEVIAPQKT         | 1568.8279 | 784.20 | 2 ##### | 2.94 | 0.42 |
| RTADGIVSHLKK              | 1040.5735 | 520.12 | 2 ##### | 2.75 | 0.34 |
| RTADGIVSHLKKQ             | 1168.6685 | 584.14 | 2 ##### | 2.53 | 0.38 |
| RTADGIVSHLKKQ             | 1168.6685 | 584.12 | 2 ##### | 2.64 | 0.43 |
| RTADGIVSHLKKQ             | 1168.6685 | 584.11 | 2 ##### | 2.73 | 0.44 |
| RTADGIVSHLKKQ             | 1168.6685 | 584.11 | 2 ##### | 3.00 | 0.45 |
| RTADGIVSHLKKQ             | 1168.6685 | 584.11 | 2 ##### | 3.17 | 0.45 |

|                    |           |        |         |      |      |
|--------------------|-----------|--------|---------|------|------|
| RTALVSADGEEVAVKA   | 1388.7268 | 694.15 | 2 ##### | 2.51 | 0.43 |
| RTALVSADGEEVAVKA   | 1388.7268 | 694.11 | 2 ##### | 3.01 | 0.50 |
| RTALVSADGEEVAVKA   | 1388.7268 | 694.10 | 2 ##### | 3.23 | 0.53 |
| RTDDPLLQLLQKA      | 1283.7206 | 641.70 | 2 ##### | 2.91 | 0.33 |
| RTDDPLLQLLQKA      | 1283.7206 | 641.67 | 2 ##### | 3.00 | 0.38 |
| RTDDPLLQLLQKA      | 1283.7206 | 641.66 | 2 ##### | 3.49 | 0.39 |
| RTDEQALLSSILAKT    | 1388.7632 | 694.18 | 2 ##### | 3.33 | 0.40 |
| RTDGLVSLLTTSKD     | 1234.6890 | 617.14 | 2 ##### | 2.62 | 0.42 |
| RTDGLVSLLTTSKD     | 1234.6890 | 617.06 | 2 ##### | 3.29 | 0.57 |
| RTDGLVSLLTTSKD     | 1234.6890 | 617.05 | 2 ##### | 3.62 | 0.58 |
| RTDYNASVSPDSSGPERI | 1780.7985 | 890.09 | 2 ##### | 3.18 | 0.62 |
| RTDYNASVSPDSSGPERI | 1780.7985 | 890.10 | 2 ##### | 3.33 | 0.61 |
| RTDYNASVSPDSSGPERI | 1780.7985 | 890.13 | 2 ##### | 3.35 | 0.53 |
| RTDYNASVSPDSSGPERI | 1780.7985 | 890.11 | 2 ##### | 3.58 | 0.58 |
| RTDYNASVSPDSSGPERI | 1780.7985 | 890.11 | 2 ##### | 3.66 | 0.59 |
| RTDYNASVSPDSSGPERI | 1780.7985 | 890.11 | 2 ##### | 3.70 | 0.59 |
| RTDYNASVSPDSSGPERI | 1780.7985 | 890.09 | 2 ##### | 3.82 | 0.61 |
| RTDYNASVSPDSSGPERI | 1780.7985 | 890.11 | 2 ##### | 4.33 | 0.58 |
| RTDYNASVSPDSSGPERI | 1780.7985 | 890.09 | 2 ##### | 4.34 | 0.61 |
| RTEPTAQQNLALQLAEKL | 1754.9283 | 877.29 | 2 ##### | 2.69 | 0.36 |
| RTEPTAQQNLALQLAEKL | 1754.9283 | 877.26 | 2 ##### | 3.64 | 0.40 |
| RTEPTAQQNLALQLAEKL | 1754.9283 | 877.23 | 2 ##### | 4.55 | 0.46 |
| RTEPTAQQNLALQLAEKL | 1754.9283 | 877.23 | 2 ##### | 4.56 | 0.48 |
| RTEPTAQQNLALQLAEKL | 1754.9283 | 877.23 | 2 ##### | 4.56 | 0.48 |
| RTEPTAQQNLALQLAEKL | 1754.9283 | 877.22 | 2 ##### | 4.63 | 0.48 |
| RTEPTAQQNLALQLAEKL | 1754.9283 | 877.22 | 2 ##### | 4.69 | 0.49 |
| RTEQGPQVDETQFKK    | 1506.7070 | 753.07 | 2 ##### | 4.03 | 0.56 |
| RTEQGPQVDETQFKK    | 1506.7070 | 753.04 | 2 ##### | 4.06 | 0.64 |
| RTEQGPQVDETQFKK    | 1506.7070 | 753.05 | 2 ##### | 4.08 | 0.61 |
| RTFIAIKPDGVQRG     | 1344.7634 | 672.27 | 2 ##### | 2.54 | 0.22 |
| RTFIAIKPDGVQRG     | 1344.7634 | 672.28 | 2 ##### | 2.60 | 0.20 |
| RTFIAIKPDGVQRG     | 1344.7634 | 672.21 | 2 ##### | 2.97 | 0.34 |
| RTFVQENVYDEFVERS   | 1774.8282 | 887.16 | 2 ##### | 2.88 | 0.51 |
| RTFVQENVYDEFVERS   | 1774.8282 | 887.18 | 2 ##### | 3.19 | 0.46 |
| RTGAIVDVPVGEELLGRV | 1624.8905 | 812.30 | 2 ##### | 2.64 | 0.28 |
| RTGAIVDVPVGEELLGRV | 1624.8905 | 812.24 | 2 ##### | 2.86 | 0.41 |
| RTGAIVDVPVGEELLGRV | 1624.8905 | 812.17 | 2 ##### | 3.01 | 0.55 |
| RTGAIVDVPVGEELLGRV | 1624.8905 | 812.28 | 2 ##### | 3.03 | 0.33 |
| RTGAIVDVPVGEELLGRV | 1624.8905 | 812.23 | 2 ##### | 3.13 | 0.43 |
| RTGAIVDVPVGEELLGRV | 1624.8905 | 812.17 | 2 ##### | 3.19 | 0.55 |
| RTGAIVDVPVGEELLGRV | 1624.8905 | 812.24 | 2 ##### | 3.33 | 0.41 |
| RTGAIVDVPVGEELLGRV | 1624.8905 | 812.26 | 2 ##### | 3.45 | 0.38 |
| RTGAIVDVPVGEELLGRV | 1624.8905 | 812.25 | 2 ##### | 3.53 | 0.38 |
| RTGAIVDVPVGEELLGRV | 1624.8905 | 812.17 | 2 ##### | 3.61 | 0.54 |
| RTGAIVDVPVGEELLGRV | 1624.8905 | 812.27 | 2 ##### | 3.62 | 0.36 |
| RTGAIVDVPVGEELLGRV | 1624.8905 | 812.18 | 2 ##### | 3.63 | 0.53 |
| RTGAIVDVPVGEELLGRV | 1624.8905 | 812.19 | 2 ##### | 3.78 | 0.52 |
| RTGAIVDVPVGEELLGRV | 1624.8905 | 812.19 | 2 ##### | 3.86 | 0.51 |
| RTGAIVDVPVGEELLGRV | 1624.8905 | 812.23 | 2 ##### | 3.89 | 0.43 |
| RTGAIVDVPVGEELLGRV | 1624.8905 | 812.19 | 2 ##### | 4.14 | 0.50 |
| RTGEAIVDAALSALRQ   | 1386.7587 | 693.21 | 2 ##### | 3.44 | 0.34 |
| RTGEAIVDAALSALRQ   | 1386.7587 | 693.17 | 2 ##### | 3.62 | 0.42 |
| RTGEAIVDAALSALRQ   | 1386.7587 | 693.18 | 2 ##### | 3.69 | 0.40 |
| RTGEAIVDAALSALRQ   | 1386.7587 | 693.15 | 2 ##### | 3.83 | 0.46 |
| RTGEAIVDAALSALRQ   | 1386.7587 | 693.16 | 2 ##### | 3.84 | 0.43 |
| RTGEAIVDAALSALRQ   | 1386.7587 | 693.14 | 2 ##### | 3.96 | 0.47 |
| RTGEAIVDAALSALRQ   | 1386.7587 | 693.14 | 2 ##### | 4.07 | 0.47 |

|                        |           |        |         |      |      |
|------------------------|-----------|--------|---------|------|------|
| RTGEAIVDAALSALRQ       | 1386.7587 | 693.16 | 2 ##### | 4.25 | 0.44 |
| RTGEAIVDAALSALRQ       | 1386.7587 | 693.12 | 2 ##### | 4.45 | 0.51 |
| RTGEAIVDAALSALRQ       | 1386.7587 | 693.13 | 2 ##### | 4.61 | 0.49 |
| RTGSESSQTGASATSGRN     | 1483.6619 | 741.52 | 2 ##### | 3.05 | 0.62 |
| RTGSESSQTGASATSGRN     | 1483.6619 | 741.50 | 2 ##### | 3.45 | 0.65 |
| RTNEKVELQELNDRF        | 1587.7972 | 529.13 | 3 ##### | 3.17 | 0.42 |
| RTNEKVELQELNDRF        | 1587.7972 | 529.16 | 3 ##### | 3.22 | 0.31 |
| RTNEKVELQELNDRF        | 1587.7972 | 529.16 | 3 ##### | 3.52 | 0.31 |
| RTNQELQEINRV           | 1244.6229 | 622.17 | 2 ##### | 2.83 | 0.29 |
| RTNQELQEINRV           | 1244.6229 | 622.13 | 2 ##### | 2.96 | 0.37 |
| RTNQELQEINRV           | 1244.6229 | 622.16 | 2 ##### | 2.98 | 0.30 |
| RTNQELQEINRV           | 1244.6229 | 622.14 | 2 ##### | 3.09 | 0.34 |
| RTNQELQEINRV           | 1244.6229 | 622.16 | 2 ##### | 3.22 | 0.30 |
| RTTETQVLVASAQKK        | 1375.7428 | 687.71 | 2 ##### | 2.83 | 0.33 |
| RTTETQVLVASAQKK        | 1375.7428 | 687.73 | 2 ##### | 2.88 | 0.29 |
| RTTPSVVAFTADGERL       | 1450.7173 | 725.11 | 2 ##### | 2.58 | 0.49 |
| RTTPSVVAFTADGERL       | 1450.7173 | 725.07 | 2 ##### | 3.17 | 0.58 |
| RTTPSVVAFTADGERL       | 1450.7173 | 725.05 | 2 ##### | 3.25 | 0.63 |
| RTTPSVVAFTADGERL       | 1450.7173 | 725.03 | 2 ##### | 3.42 | 0.65 |
| RTTPSVVAFTADGERL       | 1450.7173 | 725.03 | 2 ##### | 3.50 | 0.65 |
| RTTPSYVAFTDTERL        | 1487.7013 | 743.50 | 2 ##### | 2.51 | 0.70 |
| RTTPSYVAFTDTERL        | 1487.7013 | 743.72 | 2 ##### | 2.51 | 0.27 |
| RTTPSYVAFTDTERL        | 1487.7013 | 743.67 | 2 ##### | 2.60 | 0.37 |
| RTTPSYVAFTDTERL        | 1487.7013 | 743.77 | 2 ##### | 2.79 | 0.17 |
| RTTPSYVAFTDTERL        | 1487.7013 | 743.58 | 2 ##### | 2.84 | 0.54 |
| RTTPSYVAFTDTERL        | 1487.7013 | 743.52 | 2 ##### | 2.85 | 0.66 |
| RTTPSYVAFTDTERL        | 1487.7013 | 743.68 | 2 ##### | 2.86 | 0.34 |
| RTTPSYVAFTDTERL        | 1487.7013 | 743.51 | 2 ##### | 2.86 | 0.69 |
| RTTPSYVAFTDTERL        | 1487.7013 | 743.67 | 2 ##### | 2.94 | 0.36 |
| RTTPSYVAFTDTERL        | 1487.7013 | 743.55 | 2 ##### | 3.05 | 0.60 |
| RTTPSYVAFTDTERL        | 1487.7013 | 743.57 | 2 ##### | 3.08 | 0.56 |
| RTTPSYVAFTDTERL        | 1487.7013 | 743.57 | 2 ##### | 3.12 | 0.55 |
| RTTPSYVAFTDTERL        | 1487.7013 | 743.61 | 2 ##### | 3.15 | 0.49 |
| RTTPSYVAFTDTERL        | 1487.7013 | 743.55 | 2 ##### | 3.21 | 0.61 |
| RTTPSYVAFTDTERL        | 1487.7013 | 743.55 | 2 ##### | 3.29 | 0.61 |
| RTTPSYVAFTDTERL        | 1487.7013 | 743.54 | 2 ##### | 3.30 | 0.61 |
| RTVESEAAASYLDQISRY     | 1668.8075 | 834.19 | 2 ##### | 3.18 | 0.42 |
| RTVESEAAASYLDQISRY     | 1668.8075 | 834.17 | 2 ##### | 3.82 | 0.46 |
| RTVESEAAASYLDQISRY     | 1668.8075 | 834.16 | 2 ##### | 4.24 | 0.48 |
| RTVVAGSSEAAQKA         | 1147.5953 | 573.65 | 2 ##### | 2.92 | 0.30 |
| RTVVAGSSEAAQKA         | 1147.5953 | 573.62 | 2 ##### | 3.23 | 0.36 |
| RTVVAGSSEAAQKA         | 1147.5953 | 573.60 | 2 ##### | 3.44 | 0.39 |
| RVAEDDEDDDDVDTKK       | 1465.5813 | 732.50 | 2 ##### | 3.53 | 0.58 |
| RVAEDDEDDDDVDTKK       | 1465.5813 | 732.49 | 2 ##### | 3.59 | 0.60 |
| RVAEDDEDDDDVDTKK       | 1465.5813 | 732.45 | 2 ##### | 4.11 | 0.68 |
| RVAEDDEDDDDVDTKK       | 1465.5813 | 732.45 | 2 ##### | 4.16 | 0.67 |
| RVAEDDEDDDDVDTKK       | 1465.5813 | 732.45 | 2 ##### | 4.59 | 0.68 |
| RVAEDDEDDDDVDTKK       | 1465.5813 | 732.45 | 2 ##### | 4.60 | 0.68 |
| RVAEDDEDDDDVDTKK       | 1465.5813 | 732.46 | 2 ##### | 4.62 | 0.66 |
| RVAEDDEDDDDVDTKK       | 1465.5813 | 732.47 | 2 ##### | 4.66 | 0.64 |
| RVAEDDEDDDDVDTKKQ      | 1593.6763 | 796.64 | 2 ##### | 3.70 | 0.40 |
| RVAEDDEDDDDVDTKKQ      | 1593.6763 | 796.59 | 2 ##### | 4.48 | 0.50 |
| RVAGTGEGGLEELVEELNSGKV | 1987.9818 | 993.74 | 2 ##### | 3.59 | 0.50 |
| RVAGTGEGGLEELVEELNSGKV | 1987.9818 | 993.69 | 2 ##### | 3.73 | 0.60 |
| RVAGTGEGGLEELVEELNSGKV | 1987.9818 | 993.69 | 2 ##### | 3.78 | 0.60 |
| RVALTGLTVAEYFRD        | 1439.7893 | 719.62 | 2 ##### | 3.38 | 0.54 |

|                         |           |        |         |      |      |
|-------------------------|-----------|--------|---------|------|------|
| RVAP EEHP TLL TEAPLNPKA | 1956.0437 | 651.92 | 3 ##### | 3.03 | 0.29 |
| RVAP EEHP TLL TEAPLNPKA | 1956.0437 | 651.93 | 3 ##### | 3.03 | 0.25 |
| RVAP EEHP TLL TEAPLNPKA | 1956.0437 | 651.92 | 3 ##### | 3.06 | 0.30 |
| RVAP EEHP TLL TEAPLNPKA | 1956.0437 | 651.90 | 3 ##### | 3.06 | 0.33 |
| RVAP EEHP TLL TEAPLNPKA | 1956.0437 | 651.91 | 3 ##### | 3.07 | 0.31 |
| RVAP EEHP TLL TEAPLNPKA | 1956.0437 | 651.92 | 3 ##### | 3.08 | 0.29 |
| RVAP EEHP TLL TEAPLNPKA | 1956.0437 | 651.91 | 3 ##### | 3.09 | 0.31 |
| RVAP EEHP TLL TEAPLNPKA | 1956.0437 | 651.85 | 3 ##### | 3.12 | 0.50 |
| RVAP EEHP TLL TEAPLNPKA | 1956.0437 | 651.89 | 3 ##### | 3.17 | 0.39 |
| RVAP EEHP TLL TEAPLNPKA | 1956.0437 | 651.90 | 3 ##### | 3.17 | 0.36 |
| RVAP EEHP TLL TEAPLNPKA | 1956.0437 | 651.90 | 3 ##### | 3.18 | 0.36 |
| RVAP EEHP TLL TEAPLNPKA | 1956.0437 | 651.88 | 3 ##### | 3.20 | 0.42 |
| RVAP EEHP TLL TEAPLNPKA | 1956.0437 | 651.86 | 3 ##### | 3.22 | 0.47 |
| RVAP EEHP TLL TEAPLNPKA | 1956.0437 | 651.93 | 3 ##### | 3.24 | 0.26 |
| RVAP EEHP TLL TEAPLNPKA | 1956.0437 | 977.79 | 2 ##### | 3.24 | 0.47 |
| RVAP EEHP TLL TEAPLNPKA | 1956.0437 | 977.76 | 2 ##### | 3.27 | 0.52 |
| RVAP EEHP TLL TEAPLNPKA | 1956.0437 | 651.92 | 3 ##### | 3.29 | 0.29 |
| RVAP EEHP TLL TEAPLNPKA | 1956.0437 | 651.88 | 3 ##### | 3.30 | 0.41 |
| RVAP EEHP TLL TEAPLNPKA | 1956.0437 | 651.89 | 3 ##### | 3.31 | 0.36 |
| RVAP EEHP TLL TEAPLNPKA | 1956.0437 | 651.88 | 3 ##### | 3.31 | 0.39 |
| RVAP EEHP TLL TEAPLNPKA | 1956.0437 | 977.76 | 2 ##### | 3.32 | 0.53 |
| RVAP EEHP TLL TEAPLNPKA | 1956.0437 | 977.76 | 2 ##### | 3.52 | 0.53 |
| RVAP EEHP TLL TEAPLNPKA | 1956.0437 | 651.86 | 3 ##### | 3.52 | 0.46 |
| RVAP EEHP TLL TEAPLNPKA | 1956.0437 | 977.76 | 2 ##### | 3.55 | 0.52 |
| RVAP EEHP VLL TEAPLNPKA | 1954.0645 | 651.31 | 3 ##### | 3.21 | 0.14 |
| RVAP EEHP VLL TEAPLNPKA | 1954.0645 | 651.32 | 3 ##### | 3.26 | 0.11 |
| RVAP EEHP VLL TEAPLNPKA | 1954.0645 | 976.84 | 2 ##### | 3.29 | 0.38 |
| RVAP EEHP VLL TEAPLNPKA | 1954.0645 | 976.86 | 2 ##### | 3.31 | 0.34 |
| RVAP EEHP VLL TEAPLNPKA | 1954.0645 | 976.85 | 2 ##### | 3.34 | 0.36 |
| RVAP EEHP VLL TEAPLNPKA | 1954.0645 | 976.85 | 2 ##### | 3.39 | 0.35 |
| RVAP EEHP VLL TEAPLNPKA | 1954.0645 | 976.79 | 2 ##### | 3.48 | 0.48 |
| RVAP EEHP VLL TEAPLNPKA | 1954.0645 | 651.32 | 3 ##### | 3.66 | 0.11 |
| RVAP EEHP VLL TEAPLNPKA | 1954.0645 | 976.84 | 2 ##### | 3.76 | 0.38 |
| RVAP EEHP VLL TEAPLNPKA | 1954.0645 | 976.84 | 2 ##### | 3.96 | 0.39 |
| RVAP EEHP VLL TEAPLNPKA | 1954.0645 | 976.83 | 2 ##### | 3.99 | 0.40 |
| RVAP EEHP VLL TEAPLNPKA | 1954.0645 | 976.85 | 2 ##### | 4.02 | 0.37 |
| RVAP EEHP VLL TEAPLNPKA | 1954.0645 | 976.82 | 2 ##### | 4.02 | 0.42 |
| RVAP EEHP VLL TEAPLNPKA | 1954.0645 | 976.84 | 2 ##### | 4.05 | 0.38 |
| RVAP EEHP VLL TEAPLNPKA | 1954.0645 | 976.84 | 2 ##### | 4.07 | 0.39 |
| RVAP EEHP VLL TEAPLNPKA | 1954.0645 | 976.84 | 2 ##### | 4.08 | 0.39 |
| RVAP EEHP VLL TEAPLNPKA | 1954.0645 | 976.84 | 2 ##### | 4.10 | 0.39 |
| RVAP EEHP VLL TEAPLNPKA | 1954.0645 | 976.83 | 2 ##### | 4.34 | 0.40 |
| RVAVSADPNV PNVIVTRL     | 1650.9174 | 825.25 | 2 ##### | 3.38 | 0.42 |
| RVAVSADPNV PNVIVTRL     | 1650.9174 | 825.21 | 2 ##### | 3.54 | 0.50 |
| RVAVSADPNV PNVIVTRL     | 1650.9174 | 825.20 | 2 ##### | 3.76 | 0.51 |
| RVAVSADPNV PNVIVTRL     | 1650.9174 | 825.20 | 2 ##### | 3.77 | 0.52 |
| RVAVSADPNV PNVIVTRL     | 1650.9174 | 825.19 | 2 ##### | 4.02 | 0.54 |
| RVAVSADPNV PNVIVTRL     | 1650.9174 | 825.17 | 2 ##### | 4.16 | 0.58 |
| RVAVSADPNV PNVIVTRL     | 1650.9174 | 825.17 | 2 ##### | 4.22 | 0.58 |
| RVAVSADPNV PNVIVTRL     | 1650.9174 | 825.20 | 2 ##### | 4.25 | 0.51 |
| RVEVTEFEDIKS            | 1208.6045 | 604.05 | 2 ##### | 3.52 | 0.50 |
| RVEVTEFEDIKS            | 1208.6045 | 604.02 | 2 ##### | 3.68 | 0.57 |
| RVEVTEFEDIKS            | 1208.6045 | 604.03 | 2 ##### | 3.68 | 0.54 |
| RVEVTEFEDIKS            | 1208.6045 | 603.99 | 2 ##### | 3.74 | 0.62 |
| RVEVTEFEDIKS            | 1208.6045 | 604.01 | 2 ##### | 3.80 | 0.59 |
| RVEVTEFEDIKS            | 1208.6045 | 604.04 | 2 ##### | 4.00 | 0.52 |

|                     |           |        |         |      |      |
|---------------------|-----------|--------|---------|------|------|
| RVFIGNLNTLVVKK      | 1316.7937 | 658.25 | 2 ##### | 2.91 | 0.29 |
| RVFIGNLNTLVVKK      | 1316.7937 | 658.18 | 2 ##### | 3.06 | 0.43 |
| RVFIGNLNTLVVKK      | 1316.7937 | 658.24 | 2 ##### | 3.09 | 0.31 |
| RVFIGNLNTLVVKK      | 1316.7937 | 658.27 | 2 ##### | 3.17 | 0.26 |
| RVFIGNLNTLVVKK      | 1316.7937 | 658.16 | 2 ##### | 3.22 | 0.48 |
| RVFIGNLNTLVVKK      | 1316.7937 | 658.22 | 2 ##### | 3.26 | 0.36 |
| RVFIGNLNTLVVKK      | 1316.7937 | 658.21 | 2 ##### | 3.31 | 0.37 |
| RVFIGNLNTLVVKK      | 1316.7937 | 658.22 | 2 ##### | 3.33 | 0.36 |
| RVFIGNLNTLVVKK      | 1316.7937 | 658.20 | 2 ##### | 3.50 | 0.39 |
| RVFLDPNTLSDDGTVALRG | 1832.9388 | 916.30 | 2 ##### | 3.24 | 0.34 |
| RVFLDPNTLSDDGTVALRG | 1832.9388 | 916.29 | 2 ##### | 4.21 | 0.36 |
| RVFTTVGSAEKRA       | 1194.6477 | 597.24 | 2 ##### | 2.71 | 0.16 |
| RVGNLGLATSEFFNERN   | 1524.7805 | 762.16 | 2 ##### | 3.98 | 0.46 |
| RVGNLGLATSEFFNERN   | 1524.7805 | 762.14 | 2 ##### | 4.06 | 0.50 |
| RVGNLGLATSEFFNERN   | 1524.7805 | 762.14 | 2 ##### | 4.17 | 0.50 |
| RVGNLGLATSEFFNERN   | 1524.7805 | 762.15 | 2 ##### | 4.22 | 0.48 |
| RVHELNEEIGKL        | 1167.6005 | 583.73 | 2 ##### | 2.98 | 0.14 |
| RVHIEIGPDGRV        | 1092.5796 | 546.11 | 2 ##### | 2.59 | 0.36 |
| RVHIEIGPDGRV        | 1092.5796 | 546.04 | 2 ##### | 2.59 | 0.49 |
| RVHIEIGPDGRV        | 1092.5796 | 546.03 | 2 ##### | 2.84 | 0.52 |
| RVISLSGEHSIIGRT     | 1367.7642 | 683.73 | 2 ##### | 2.70 | 0.31 |
| RVISLSGEHSIIGRT     | 1367.7642 | 683.69 | 2 ##### | 2.77 | 0.39 |
| RVISLSGEHSIIGRT     | 1367.7642 | 683.69 | 2 ##### | 2.93 | 0.38 |
| RVISLSGEHSIIGRT     | 1367.7642 | 683.66 | 2 ##### | 3.00 | 0.44 |
| RVISLSGEHSIIGRT     | 1367.7642 | 683.69 | 2 ##### | 3.12 | 0.39 |
| RVISLSGEHSIIGRT     | 1367.7642 | 683.68 | 2 ##### | 3.15 | 0.40 |
| RVISLSGEHSIIGRT     | 1367.7642 | 683.65 | 2 ##### | 3.18 | 0.46 |
| RVLANPGNSQVARV      | 1225.6648 | 612.62 | 2 ##### | 3.04 | 0.42 |
| RVLANPGNSQVARV      | 1225.6648 | 612.62 | 2 ##### | 3.39 | 0.42 |
| RVLANPGNSQVARV      | 1225.6648 | 612.58 | 2 ##### | 3.44 | 0.51 |
| RVLANPGNSQVARV      | 1225.6648 | 612.61 | 2 ##### | 3.54 | 0.45 |
| RVLANPGNSQVARV      | 1225.6648 | 612.60 | 2 ##### | 3.58 | 0.47 |
| RVLANPGNSQVARV      | 1225.6648 | 612.59 | 2 ##### | 3.69 | 0.48 |
| RVNVPVIGGHAGKT      | 1147.6582 | 573.60 | 2 ##### | 2.51 | 0.46 |
| RVNVPVIGGHAGKT      | 1147.6582 | 573.61 | 2 ##### | 2.51 | 0.44 |
| RVNVPVIGGHAGKT      | 1147.6582 | 573.61 | 2 ##### | 2.54 | 0.43 |
| RVNVPVIGGHAGKT      | 1147.6582 | 573.60 | 2 ##### | 2.54 | 0.46 |
| RVNVPVIGGHAGKT      | 1147.6582 | 573.57 | 2 ##### | 2.65 | 0.52 |
| RVNVPVIGGHAGKT      | 1147.6582 | 573.58 | 2 ##### | 2.68 | 0.50 |
| RVPTPNVSVVDLTCRL    | 1556.8406 | 778.10 | 2 ##### | 3.29 | 0.63 |
| RVPTPNVSVVDLTCRL    | 1556.8406 | 778.15 | 2 ##### | 3.38 | 0.55 |
| RVPVENVLGEVGGFKV    | 1500.8057 | 750.21 | 2 ##### | 3.21 | 0.39 |
| RVQEVQQVSTNKR       | 1259.6591 | 629.62 | 2 ##### | 2.81 | 0.41 |
| RVQEVQQVSTNKR       | 1259.6591 | 629.60 | 2 ##### | 2.83 | 0.45 |
| RVQEVQQVSTNKR       | 1259.6591 | 629.57 | 2 ##### | 3.05 | 0.52 |
| RVQEVQQVSTNKR       | 1259.6591 | 629.57 | 2 ##### | 3.29 | 0.53 |
| RVREEVPLELVEAHVKK   | 1746.9749 | 582.17 | 3 ##### | 3.51 | 0.48 |
| RVREEVPLELVEAHVKK   | 1746.9749 | 582.19 | 3 ##### | 3.59 | 0.40 |
| RVREEVPLELVEAHVKK   | 1746.9749 | 582.15 | 3 ##### | 4.10 | 0.51 |
| RVREEVPLELVEAHVKK   | 1746.9749 | 582.21 | 3 ##### | 4.21 | 0.35 |
| RVREEVPLELVEAHVKK   | 1746.9749 | 582.16 | 3 ##### | 5.25 | 0.48 |
| RVSETVAFTDVNSILRY   | 1650.8698 | 825.23 | 2 ##### | 2.74 | 0.42 |
| RVSETVAFTDVNSILRY   | 1650.8698 | 825.22 | 2 ##### | 3.85 | 0.43 |
| RVSEFELFADKVPKT     | 1379.7570 | 689.78 | 2 ##### | 2.53 | 0.20 |
| RVSEFELFADKVPKT     | 1379.7570 | 689.71 | 2 ##### | 2.63 | 0.33 |
| RVSEFELFADKVPKT     | 1379.7570 | 689.74 | 2 ##### | 2.82 | 0.28 |



|                       |           |        |         |      |      |
|-----------------------|-----------|--------|---------|------|------|
| RVSFELFADKVPKT        | 1379.7570 | 689.67 | 2 ##### | 2.82 | 0.42 |
| RVSFELFADKVPKT        | 1379.7570 | 689.76 | 2 ##### | 2.89 | 0.24 |
| RVSFELFADKVPKT        | 1379.7570 | 689.76 | 2 ##### | 2.91 | 0.24 |
| RVSFELFADKVPKT        | 1379.7570 | 689.74 | 2 ##### | 3.05 | 0.28 |
| RVSFELFADKVPKT        | 1379.7570 | 689.73 | 2 ##### | 3.12 | 0.30 |
| RVSFELFADKVPKT        | 1379.7570 | 689.71 | 2 ##### | 3.20 | 0.33 |
| RVSFELFADKVPKT        | 1379.7570 | 689.70 | 2 ##### | 3.20 | 0.35 |
| RVSFELFADKVPKT        | 1379.7570 | 689.68 | 2 ##### | 3.22 | 0.39 |
| RVSFELFADKVPKT        | 1379.7570 | 689.66 | 2 ##### | 3.23 | 0.44 |
| RVSFELFADKVPKT        | 1379.7570 | 689.72 | 2 ##### | 3.25 | 0.32 |
| RVSFELFADKVPKT        | 1379.7570 | 689.72 | 2 ##### | 3.31 | 0.32 |
| RVSFELFADKVPKT        | 1379.7570 | 689.68 | 2 ##### | 3.36 | 0.40 |
| RVSFELFADKVPKT        | 1379.7570 | 689.69 | 2 ##### | 3.48 | 0.37 |
| RVSFELFADKVPKT        | 1379.7570 | 689.73 | 2 ##### | 3.50 | 0.29 |
| RVSFELFADKVPKT        | 1379.7570 | 689.72 | 2 ##### | 3.50 | 0.32 |
| RVSFELFADKVPKT        | 1379.7570 | 689.71 | 2 ##### | 3.64 | 0.34 |
| RVSFELFADKVPKT        | 1379.7570 | 689.70 | 2 ##### | 3.64 | 0.35 |
| RVTIAQGGVLPNIQAVLLPKK | 1931.1688 | 643.61 | 3 ##### | 3.04 | 0.34 |
| RVTIAQGGVLPNIQAVLLPKK | 1931.1688 | 965.39 | 2 ##### | 3.12 | 0.39 |
| RVTIAQGGVLPNIQAVLLPKK | 1931.1688 | 965.33 | 2 ##### | 3.34 | 0.50 |
| RVTIAQGGVLPNIQAVLLPKK | 1931.1688 | 965.32 | 2 ##### | 3.39 | 0.53 |
| RVTIAQGGVLPNIQAVLLPKK | 1931.1688 | 965.37 | 2 ##### | 3.39 | 0.43 |
| RVTIAQGGVLPNIQAVLLPKK | 1931.1688 | 965.35 | 2 ##### | 3.60 | 0.46 |
| RVTIAQGGVLPNIQAVLLPKK | 1931.1688 | 965.36 | 2 ##### | 3.66 | 0.45 |
| RVTIAQGGVLPNIQAVLLPKK | 1931.1688 | 965.36 | 2 ##### | 3.71 | 0.46 |
| RVTIAQGGVLPNIQAVLLPKK | 1931.1688 | 965.32 | 2 ##### | 3.78 | 0.53 |
| RVTIAQGGVLPNIQAVLLPKK | 1931.1688 | 965.37 | 2 ##### | 3.79 | 0.44 |
| RVTIAQGGVLPNIQAVLLPKK | 1931.1688 | 965.34 | 2 ##### | 3.80 | 0.49 |
| RVTIAQGGVLPNIQAVLLPKK | 1931.1688 | 965.32 | 2 ##### | 3.81 | 0.53 |
| RVTIAQGGVLPNIQAVLLPKK | 1931.1688 | 965.34 | 2 ##### | 3.84 | 0.48 |
| RVTIAQGGVLPNIQAVLLPKK | 1931.1688 | 965.35 | 2 ##### | 3.96 | 0.47 |
| RVTIAQGGVLPNIQAVLLPKK | 1931.1688 | 965.33 | 2 ##### | 3.97 | 0.51 |
| RVTIAQGGVLPNIQAVLLPKK | 1931.1688 | 965.33 | 2 ##### | 3.99 | 0.52 |
| RVTIAQGGVLPNIQAVLLPKK | 1931.1688 | 965.33 | 2 ##### | 4.08 | 0.51 |
| RVTIAQGGVLPNIQAVLLPKK | 1931.1688 | 965.34 | 2 ##### | 4.09 | 0.48 |
| RVTIAQGGVLPNIQAVLLPKK | 1931.1688 | 965.30 | 2 ##### | 4.17 | 0.56 |
| RVTIAQGGVLPNIQAVLLPKK | 1931.1688 | 965.31 | 2 ##### | 4.23 | 0.54 |
| RVTIAQGGVLPNIQAVLLPKK | 1931.1688 | 965.28 | 2 ##### | 4.24 | 0.61 |
| RVTIAQGGVLPNIQAVLLPKK | 1931.1688 | 965.27 | 2 ##### | 4.24 | 0.63 |
| RVTIAQGGVLPNIQAVLLPKK | 1931.1688 | 965.35 | 2 ##### | 4.29 | 0.47 |
| RVTIAQGGVLPNIQAVLLPKK | 1931.1688 | 965.29 | 2 ##### | 4.36 | 0.58 |
| RVTIAQGGVLPNIQAVLLPKK | 1931.1688 | 965.31 | 2 ##### | 4.37 | 0.56 |
| RVTIAQGGVLPNIQAVLLPKK | 1931.1688 | 965.25 | 2 ##### | 4.39 | 0.67 |
| RVTIAQGGVLPNIQAVLLPKK | 1931.1688 | 965.31 | 2 ##### | 4.41 | 0.54 |
| RVTIAQGGVLPNIQAVLLPKK | 1931.1688 | 643.53 | 3 ##### | 4.48 | 0.58 |
| RVTIAQGGVLPNIQAVLLPKK | 1931.1688 | 965.30 | 2 ##### | 4.51 | 0.57 |
| RVTIAQGGVLPNIQAVLLPKK | 1931.1688 | 965.25 | 2 ##### | 4.54 | 0.67 |
| RVTIAQGGVLPNIQAVLLPKK | 1931.1688 | 965.32 | 2 ##### | 4.54 | 0.53 |
| RVTIAQGGVLPNIQAVLLPKK | 1931.1688 | 965.29 | 2 ##### | 4.60 | 0.58 |
| RVTIAQGGVLPNIQAVLLPKK | 1931.1688 | 643.53 | 3 ##### | 4.60 | 0.59 |
| RVTIAQGGVLPNIQAVLLPKK | 1931.1688 | 643.57 | 3 ##### | 4.65 | 0.46 |
| RVTIAQGGVLPNIQAVLLPKK | 1931.1688 | 965.31 | 2 ##### | 4.65 | 0.54 |
| RVTIAQGGVLPNIQAVLLPKK | 1931.1688 | 965.30 | 2 ##### | 4.67 | 0.57 |
| RVTIAQGGVLPNIQAVLLPKK | 1931.1688 | 965.29 | 2 ##### | 4.69 | 0.60 |
| RVTIAQGGVLPNIQAVLLPKK | 1931.1688 | 965.26 | 2 ##### | 4.80 | 0.65 |
| RVTIAQGGVLPNIQAVLLPKK | 1931.1688 | 965.30 | 2 ##### | 4.92 | 0.56 |

|                       |           |        |         |      |      |
|-----------------------|-----------|--------|---------|------|------|
| RVTIAQGGVLPNIQAVLLPKK | 1931.1688 | 965.26 | 2 ##### | 5.38 | 0.64 |
| RVVLIGGKPDV           | 1053.6415 | 526.64 | 2 ##### | 2.52 | 0.36 |
| RVVLIGGKPDV           | 1053.6415 | 526.66 | 2 ##### | 2.57 | 0.32 |
| RVVLIGGKPDV           | 1053.6415 | 526.65 | 2 ##### | 2.77 | 0.34 |
| RVYIASSSGSTAIKK       | 1283.6842 | 641.67 | 2 ##### | 2.98 | 0.34 |
| RYALYDATYETKE         | 1337.6260 | 668.51 | 2 ##### | 3.03 | 0.61 |
| RYALYDATYETKE         | 1337.6260 | 668.52 | 2 ##### | 3.30 | 0.59 |
| RYALYDATYETKE         | 1337.6260 | 668.55 | 2 ##### | 3.39 | 0.53 |
| RYALYDATYETKE         | 1337.6260 | 668.54 | 2 ##### | 3.47 | 0.54 |
| RYDGGQVAVFGSDFQEKL    | 1689.7755 | 844.62 | 2 ##### | 3.85 | 0.53 |
| RYDGGQVAVFGSDFQEKL    | 1689.7755 | 844.57 | 2 ##### | 4.48 | 0.64 |
| RYDGGQVAVFGSDFQEKL    | 1689.7755 | 844.56 | 2 ##### | 4.90 | 0.66 |
| RYESLTDPSKLDGSGKE     | 1539.7537 | 769.62 | 2 ##### | 2.99 | 0.52 |
| RYESLTDPSKLDGSGKE     | 1539.7537 | 769.62 | 2 ##### | 3.75 | 0.51 |
| RYESLTDPSKLDGSGKE     | 1539.7537 | 769.60 | 2 ##### | 3.86 | 0.55 |
| RYESLTDPSKLDGSGKE     | 1539.7537 | 769.61 | 2 ##### | 3.86 | 0.54 |
| RYESLTDPSKLDGSGKE     | 1539.7537 | 769.61 | 2 ##### | 3.96 | 0.54 |
| RYESLTDPSKLDGSGKE     | 1539.7537 | 769.61 | 2 ##### | 4.12 | 0.54 |
| RYESLTDPSKLDGSGKE     | 1539.7537 | 769.58 | 2 ##### | 4.45 | 0.59 |
| RYFPTQALNFAFKD        | 1446.7416 | 723.17 | 2 ##### | 2.52 | 0.41 |
| RYFPTQALNFAFKD        | 1446.7416 | 723.12 | 2 ##### | 3.06 | 0.50 |
| RYFPTQALNFAFKD        | 1446.7416 | 723.09 | 2 ##### | 3.59 | 0.56 |
| RYFPTQALNFAFKD        | 1446.7416 | 723.11 | 2 ##### | 3.66 | 0.51 |
| RYFPTQALNFAFKD        | 1446.7416 | 723.08 | 2 ##### | 3.82 | 0.58 |
| RYFPTQALNFAFKD        | 1446.7416 | 723.05 | 2 ##### | 3.91 | 0.64 |
| RYFPTQALNFAFKD        | 1446.7416 | 723.08 | 2 ##### | 3.98 | 0.57 |
| RYFPTQALNFAFKD        | 1446.7416 | 723.03 | 2 ##### | 4.01 | 0.68 |
| RYITPDQLADLYKS        | 1439.7417 | 719.63 | 2 ##### | 2.52 | 0.49 |
| RYITPDQLADLYKS        | 1439.7417 | 719.67 | 2 ##### | 2.58 | 0.41 |
| RYITPDQLADLYKS        | 1439.7417 | 719.63 | 2 ##### | 2.62 | 0.48 |
| RYITPDQLADLYKS        | 1439.7417 | 719.78 | 2 ##### | 2.68 | 0.19 |
| RYITPDQLADLYKS        | 1439.7417 | 719.65 | 2 ##### | 2.74 | 0.44 |
| RYITPDQLADLYKS        | 1439.7417 | 719.65 | 2 ##### | 2.76 | 0.45 |
| RYITPDQLADLYKS        | 1439.7417 | 719.65 | 2 ##### | 2.80 | 0.44 |
| RYITPDQLADLYKS        | 1439.7417 | 719.61 | 2 ##### | 2.90 | 0.52 |
| RYITPDQLADLYKS        | 1439.7417 | 719.62 | 2 ##### | 2.92 | 0.50 |
| RYITPDQLADLYKS        | 1439.7417 | 719.63 | 2 ##### | 2.92 | 0.48 |
| RYITPDQLADLYKS        | 1439.7417 | 719.62 | 2 ##### | 3.05 | 0.51 |
| RYITPDQLADLYKS        | 1439.7417 | 719.63 | 2 ##### | 3.18 | 0.48 |
| RYITPDQLADLYKS        | 1439.7417 | 719.61 | 2 ##### | 3.20 | 0.53 |
| RYITPDQLADLYKS        | 1439.7417 | 719.61 | 2 ##### | 3.35 | 0.53 |
| RYITPDQLADLYKS        | 1439.7417 | 719.61 | 2 ##### | 3.39 | 0.51 |
| RYITPDQLADLYKS        | 1439.7417 | 719.60 | 2 ##### | 3.47 | 0.54 |
| RYLAEFATGNDRKE        | 1384.6855 | 692.12 | 2 ##### | 2.70 | 0.44 |
| RYLAEFATGNDRKE        | 1384.6855 | 692.11 | 2 ##### | 2.98 | 0.47 |
| RYLAEFATGNDRKE        | 1384.6855 | 692.15 | 2 ##### | 2.99 | 0.38 |
| RYLAEFATGNDRKE        | 1384.6855 | 692.16 | 2 ##### | 3.06 | 0.37 |
| RYLAEFATGNDRKE        | 1384.6855 | 692.13 | 2 ##### | 3.15 | 0.43 |
| RYLAEFATGNDRKE        | 1384.6855 | 692.12 | 2 ##### | 3.25 | 0.45 |
| RYLAEFATGNDRKE        | 1384.6855 | 692.11 | 2 ##### | 3.31 | 0.46 |
| RYLAEFATGNDRKE        | 1384.6855 | 692.11 | 2 ##### | 3.32 | 0.46 |
| RYLAEFATGNDRKE        | 1384.6855 | 692.15 | 2 ##### | 3.40 | 0.39 |
| RYLAEVAAGDDKKG        | 1279.6528 | 639.63 | 2 ##### | 3.05 | 0.40 |
| RYLAEVAAGDDKKG        | 1279.6528 | 639.63 | 2 ##### | 3.10 | 0.39 |
| RYLAEVAAGDDKKG        | 1279.6528 | 639.67 | 2 ##### | 3.12 | 0.32 |
| RYLAEVAAGDDKKG        | 1279.6528 | 639.67 | 2 ##### | 3.22 | 0.32 |

|                       |           |         |         |      |      |
|-----------------------|-----------|---------|---------|------|------|
| RYLAEVAAGDDKKG        | 1279.6528 | 639.63  | 2 ##### | 3.37 | 0.40 |
| RYLAEVAAGDDKKG        | 1279.6528 | 639.64  | 2 ##### | 3.61 | 0.37 |
| RYLAEVAAGDDKKG        | 1279.6528 | 639.67  | 2 ##### | 3.69 | 0.31 |
| RYLAEVAAGDDKKG        | 1279.6528 | 639.66  | 2 ##### | 3.69 | 0.34 |
| RYLSEVASGENKQ         | 1196.5793 | 598.09  | 2 ##### | 2.73 | 0.41 |
| RYLSEVASGENKQ         | 1196.5793 | 598.14  | 2 ##### | 2.99 | 0.30 |
| RYQQAGLPLIVLAGKE      | 1470.8679 | 735.16  | 2 ##### | 2.90 | 0.55 |
| RYQQAGLPLIVLAGKE      | 1470.8679 | 735.15  | 2 ##### | 3.32 | 0.57 |
| RYVASYLLAALGGNSSPSAKD | 1868.9752 | 934.23  | 2 ##### | 3.53 | 0.51 |
| RYVASYLLAALGGNSSPSAKD | 1868.9752 | 934.19  | 2 ##### | 4.54 | 0.59 |
| VNPTVFFDITADDEPLGRV   | 2005.9866 | 1002.66 | 2 ##### | 4.23 | 0.66 |
| VNPTVFFDITADDEPLGRV   | 2005.9866 | 1002.65 | 2 ##### | 4.26 | 0.69 |
| VNPTVFFDITADDEPLGRV   | 2005.9866 | 1002.67 | 2 ##### | 4.41 | 0.64 |
| VNPTVFFDITADDEPLGRV   | 2005.9866 | 1002.65 | 2 ##### | 4.66 | 0.68 |
| APNVLASEPEIPKG        | 1364.7421 | 682.24  | 2 ##### | 2.82 | 0.27 |
| APNVLASEPEIPKG        | 1364.7421 | 682.22  | 2 ##### | 2.88 | 0.30 |
| APNVLASEPEIPKG        | 1364.7421 | 682.16  | 2 ##### | 2.92 | 0.43 |
| KAFFDDAIAELDTLSEESYKD | 2087.9656 | 695.80  | 3 ##### | 3.61 | 0.58 |
| KAFFDDAIAELDTLSEESYKD | 2087.9656 | 695.78  | 3 ##### | 4.78 | 0.62 |
| KAAGAAAIITEPEHTKE     | 1479.7802 | 739.62  | 2 ##### | 3.01 | 0.55 |
| KAAGAAAIITEPEHTKE     | 1479.7802 | 739.61  | 2 ##### | 3.46 | 0.56 |
| KAAGAAAIITEPEHTKE     | 1479.7802 | 739.62  | 2 ##### | 4.13 | 0.54 |
| KADLNNLGTIAKS         | 1242.7052 | 621.16  | 2 ##### | 2.50 | 0.39 |
| KADLNNLGTIAKS         | 1242.7052 | 621.23  | 2 ##### | 2.53 | 0.25 |
| KADLNNLGTIAKS         | 1242.7052 | 621.17  | 2 ##### | 2.53 | 0.36 |
| KADLNNLGTIAKS         | 1242.7052 | 621.28  | 2 ##### | 2.54 | 0.15 |
| KADLNNLGTIAKS         | 1242.7052 | 621.21  | 2 ##### | 2.54 | 0.29 |
| KADLNNLGTIAKS         | 1242.7052 | 621.19  | 2 ##### | 2.54 | 0.32 |
| KADLNNLGTIAKS         | 1242.7052 | 621.23  | 2 ##### | 2.55 | 0.24 |
| KADLNNLGTIAKS         | 1242.7052 | 621.24  | 2 ##### | 2.57 | 0.22 |
| KADLNNLGTIAKS         | 1242.7052 | 621.17  | 2 ##### | 2.65 | 0.36 |
| KADLNNLGTIAKS         | 1242.7052 | 621.22  | 2 ##### | 2.67 | 0.27 |
| KADLNNLGTIAKS         | 1242.7052 | 621.20  | 2 ##### | 2.67 | 0.31 |
| KADLNNLGTIAKS         | 1242.7052 | 621.13  | 2 ##### | 2.70 | 0.44 |
| KADLNNLGTIAKS         | 1242.7052 | 621.18  | 2 ##### | 2.71 | 0.35 |
| KADLNNLGTIAKS         | 1242.7052 | 621.20  | 2 ##### | 2.72 | 0.31 |
| KADLNNLGTIAKS         | 1242.7052 | 621.14  | 2 ##### | 2.75 | 0.43 |
| KADLNNLGTIAKS         | 1242.7052 | 621.15  | 2 ##### | 2.81 | 0.41 |
| KADLNNLGTIAKS         | 1242.7052 | 621.10  | 2 ##### | 2.84 | 0.51 |
| KADLNNLGTIAKS         | 1242.7052 | 621.20  | 2 ##### | 2.86 | 0.31 |
| KADLNNLGTIAKS         | 1242.7052 | 621.17  | 2 ##### | 2.88 | 0.37 |
| KADLNNLGTIAKS         | 1242.7052 | 621.20  | 2 ##### | 2.88 | 0.31 |
| KADLNNLGTIAKS         | 1242.7052 | 621.17  | 2 ##### | 2.91 | 0.37 |
| KADLNNLGTIAKS         | 1242.7052 | 621.25  | 2 ##### | 2.92 | 0.21 |
| KADLNNLGTIAKS         | 1242.7052 | 621.14  | 2 ##### | 2.95 | 0.42 |
| KADLNNLGTIAKS         | 1242.7052 | 621.18  | 2 ##### | 2.95 | 0.34 |
| KADLNNLGTIAKS         | 1242.7052 | 621.22  | 2 ##### | 2.99 | 0.27 |
| KADLNNLGTIAKS         | 1242.7052 | 621.30  | 2 ##### | 3.02 | 0.11 |
| KADLNNLGTIAKS         | 1242.7052 | 621.18  | 2 ##### | 3.08 | 0.34 |
| KADLNNLGTIAKS         | 1242.7052 | 621.16  | 2 ##### | 3.09 | 0.39 |
| KADLNNLGTIAKS         | 1242.7052 | 621.18  | 2 ##### | 3.10 | 0.35 |
| KADLNNLGTIAKS         | 1242.7052 | 621.17  | 2 ##### | 3.11 | 0.36 |
| KADLNNLGTIAKS         | 1242.7052 | 621.14  | 2 ##### | 3.15 | 0.42 |
| KADLNNLGTIAKS         | 1242.7052 | 621.13  | 2 ##### | 3.16 | 0.44 |
| KADLNNLGTIAKS         | 1242.7052 | 621.16  | 2 ##### | 3.17 | 0.38 |
| KADLNNLGTIAKS         | 1242.7052 | 621.19  | 2 ##### | 3.18 | 0.32 |

|                   |           |        |         |      |      |
|-------------------|-----------|--------|---------|------|------|
| KADLINNLGTIAKS    | 1242.7052 | 621.15 | 2 ##### | 3.19 | 0.41 |
| KADLINNLGTIAKS    | 1242.7052 | 621.21 | 2 ##### | 3.19 | 0.29 |
| KADLINNLGTIAKS    | 1242.7052 | 621.15 | 2 ##### | 3.19 | 0.41 |
| KADLINNLGTIAKS    | 1242.7052 | 621.14 | 2 ##### | 3.24 | 0.43 |
| KADLINNLGTIAKS    | 1242.7052 | 621.14 | 2 ##### | 3.25 | 0.42 |
| KADLINNLGTIAKS    | 1242.7052 | 621.21 | 2 ##### | 3.25 | 0.28 |
| KADLINNLGTIAKS    | 1242.7052 | 621.15 | 2 ##### | 3.27 | 0.41 |
| KADLINNLGTIAKS    | 1242.7052 | 621.18 | 2 ##### | 3.30 | 0.35 |
| KADLINNLGTIAKS    | 1242.7052 | 621.18 | 2 ##### | 3.31 | 0.34 |
| KADLINNLGTIAKS    | 1242.7052 | 621.18 | 2 ##### | 3.33 | 0.35 |
| KADLINNLGTIAKS    | 1242.7052 | 621.16 | 2 ##### | 3.35 | 0.39 |
| KADLINNLGTIAKS    | 1242.7052 | 621.15 | 2 ##### | 3.37 | 0.41 |
| KADLINNLGTIAKS    | 1242.7052 | 621.17 | 2 ##### | 3.39 | 0.37 |
| KADLINNLGTIAKS    | 1242.7052 | 621.15 | 2 ##### | 3.40 | 0.41 |
| KADLINNLGTIAKS    | 1242.7052 | 621.18 | 2 ##### | 3.40 | 0.35 |
| KADLINNLGTIAKS    | 1242.7052 | 621.14 | 2 ##### | 3.41 | 0.42 |
| KADLINNLGTIAKS    | 1242.7052 | 621.15 | 2 ##### | 3.41 | 0.40 |
| KADLINNLGTIAKS    | 1242.7052 | 621.17 | 2 ##### | 3.41 | 0.38 |
| KADLINNLGTIAKS    | 1242.7052 | 621.17 | 2 ##### | 3.41 | 0.36 |
| KADLINNLGTIAKS    | 1242.7052 | 621.16 | 2 ##### | 3.43 | 0.38 |
| KADLINNLGTIAKS    | 1242.7052 | 621.18 | 2 ##### | 3.46 | 0.35 |
| KADLINNLGTIAKS    | 1242.7052 | 621.14 | 2 ##### | 3.60 | 0.43 |
| KADLINNLGTIAKS    | 1242.7052 | 621.13 | 2 ##### | 3.65 | 0.45 |
| KAIAGTGANVIVTGGKV | 1328.7533 | 664.28 | 2 ##### | 3.13 | 0.20 |
| KAIAGTGANVIVTGGKV | 1328.7533 | 664.13 | 2 ##### | 3.32 | 0.49 |
| KAIAGTGANVIVTGGKV | 1328.7533 | 664.09 | 2 ##### | 3.37 | 0.58 |
| KAIAGTGANVIVTGGKV | 1328.7533 | 664.11 | 2 ##### | 3.73 | 0.53 |
| KAIAGTGANVIVTGGKV | 1328.7533 | 664.18 | 2 ##### | 3.85 | 0.38 |
| KALIAAQYSGAQVRV   | 1347.7379 | 673.57 | 2 ##### | 4.06 | 0.59 |
| KALIAAQYSGAQVRV   | 1347.7379 | 673.57 | 2 ##### | 4.26 | 0.59 |
| KALIAAQYSGAQVRV   | 1347.7379 | 673.60 | 2 ##### | 4.30 | 0.54 |
| KALIAAQYSGAQVRV   | 1347.7379 | 673.59 | 2 ##### | 4.33 | 0.56 |
| KALIAAQYSGAQVRV   | 1347.7379 | 673.59 | 2 ##### | 4.37 | 0.55 |
| KALIAAQYSGAQVRV   | 1347.7379 | 673.59 | 2 ##### | 4.42 | 0.56 |
| KALIAAQYSGAQVRV   | 1347.7379 | 673.58 | 2 ##### | 4.43 | 0.59 |
| KANKLDHVVTIIG     | 1350.8103 | 675.20 | 2 ##### | 3.22 | 0.41 |
| KAPILIATDVASRG    | 1226.7103 | 613.11 | 2 ##### | 3.11 | 0.48 |
| KAPILIATDVASRG    | 1226.7103 | 613.10 | 2 ##### | 3.31 | 0.51 |
| KAPILIATDVASRG    | 1226.7103 | 613.10 | 2 ##### | 3.39 | 0.50 |
| KAPILIATDVASRG    | 1226.7103 | 613.12 | 2 ##### | 3.61 | 0.48 |
| KAPILIATDVASRG    | 1226.7103 | 613.10 | 2 ##### | 3.61 | 0.51 |
| KAPILIATDVASRG    | 1226.7103 | 613.05 | 2 ##### | 3.65 | 0.62 |
| KAPILIATDVASRG    | 1226.7103 | 613.11 | 2 ##### | 3.75 | 0.49 |
| KATDAEADVASLNRR   | 1332.6390 | 666.14 | 2 ##### | 2.56 | 0.37 |
| KATDAEADVASLNRR   | 1332.6390 | 666.18 | 2 ##### | 2.89 | 0.27 |
| KATDAEADVASLNRR   | 1332.6390 | 666.16 | 2 ##### | 2.99 | 0.31 |
| KATDAEADVASLNRR   | 1332.6390 | 666.18 | 2 ##### | 3.04 | 0.27 |
| KATDAEADVASLNRR   | 1332.6390 | 666.13 | 2 ##### | 3.24 | 0.38 |
| KATDAEADVASLNRR   | 1332.6390 | 666.09 | 2 ##### | 3.55 | 0.46 |
| KATDAEADVASLNRR   | 1332.6390 | 666.10 | 2 ##### | 3.73 | 0.43 |
| KATDAEADVASLNRR   | 1332.6390 | 666.14 | 2 ##### | 3.76 | 0.37 |
| KAVTEQGAELSNEERN  | 1532.7188 | 766.08 | 2 ##### | 4.06 | 0.56 |
| KAVTEQGAELSNEERN  | 1532.7188 | 766.12 | 2 ##### | 4.52 | 0.48 |
| KAVTEQGAELSNEERN  | 1532.7188 | 766.12 | 2 ##### | 4.55 | 0.48 |
| KAVTEQGAELSNEERN  | 1532.7188 | 766.09 | 2 ##### | 4.56 | 0.53 |
| KAVTEQGAELSNEERN  | 1532.7188 | 766.11 | 2 ##### | 4.59 | 0.49 |

|                       |           |        |         |      |      |
|-----------------------|-----------|--------|---------|------|------|
| KDAALATALGDKKS        | 1173.6473 | 586.68 | 2 ##### | 2.60 | 0.30 |
| KDAALATALGDKKS        | 1173.6473 | 586.61 | 2 ##### | 2.65 | 0.44 |
| KDAALATALGDKKS        | 1173.6473 | 586.63 | 2 ##### | 3.64 | 0.39 |
| KDAALATALGDKKS        | 1173.6473 | 586.67 | 2 ##### | 3.64 | 0.31 |
| KDAALATALGDKKS        | 1173.6473 | 586.65 | 2 ##### | 3.71 | 0.35 |
| KDAALATALGDKKS        | 1173.6473 | 586.67 | 2 ##### | 3.77 | 0.31 |
| KDAALATALGDKKS        | 1173.6473 | 586.61 | 2 ##### | 4.00 | 0.43 |
| KDAGTIAGLNLRI         | 1199.6743 | 599.74 | 2 ##### | 2.52 | 0.20 |
| KDAGTIAGLNLRI         | 1199.6743 | 599.76 | 2 ##### | 2.52 | 0.16 |
| KDAGTIAGLNLRI         | 1199.6743 | 599.77 | 2 ##### | 2.56 | 0.14 |
| KDAGTIAGLNLRI         | 1199.6743 | 599.71 | 2 ##### | 2.64 | 0.25 |
| KDAGTIAGLNLRI         | 1199.6743 | 599.74 | 2 ##### | 2.67 | 0.19 |
| KDAGTIAGLNLRI         | 1199.6743 | 599.73 | 2 ##### | 2.68 | 0.21 |
| KDAGTIAGLNLRI         | 1199.6743 | 599.77 | 2 ##### | 2.69 | 0.13 |
| KDAGTIAGLNLRI         | 1199.6743 | 599.75 | 2 ##### | 2.70 | 0.17 |
| KDAGTIAGLNLRI         | 1199.6743 | 599.74 | 2 ##### | 2.71 | 0.20 |
| KDAGTIAGLNLRI         | 1199.6743 | 599.71 | 2 ##### | 2.77 | 0.25 |
| KDAGTIAGLNLRI         | 1199.6743 | 599.71 | 2 ##### | 2.80 | 0.25 |
| KDAGTIAGLNLRI         | 1199.6743 | 599.69 | 2 ##### | 2.81 | 0.29 |
| KDAGTIAGLNLRI         | 1199.6743 | 599.69 | 2 ##### | 2.95 | 0.29 |
| KDAGTIAGLNLRI         | 1199.6743 | 599.71 | 2 ##### | 2.97 | 0.25 |
| KDAGTIAGLNLRI         | 1199.6743 | 599.75 | 2 ##### | 3.09 | 0.17 |
| KDAGTIAGLNLRI         | 1199.6743 | 599.68 | 2 ##### | 3.11 | 0.31 |
| KDAGTIAGLNLRI         | 1199.6743 | 599.68 | 2 ##### | 3.28 | 0.32 |
| KDAGTIAGLNLRI         | 1199.6743 | 599.74 | 2 ##### | 3.33 | 0.20 |
| KDAGTIAGLNLRI         | 1199.6743 | 599.70 | 2 ##### | 3.37 | 0.27 |
| KDAGTIAGLNLRI         | 1199.6743 | 599.67 | 2 ##### | 3.57 | 0.34 |
| KDAGTIAGLNLRI         | 1199.6743 | 599.67 | 2 ##### | 3.62 | 0.34 |
| KDATNVGDEGGFAPNILENKE | 1960.9247 | 980.15 | 2 ##### | 4.69 | 0.63 |
| KDATNVGDEGGFAPNILENKE | 1960.9247 | 980.18 | 2 ##### | 4.92 | 0.57 |
| KDATNVGDEGGFAPNILENKE | 1960.9247 | 980.16 | 2 ##### | 5.11 | 0.60 |
| KDATNVGDEGGFAPNILENKE | 1960.9247 | 980.19 | 2 ##### | 5.37 | 0.53 |
| KDEILPTTPISEQKG       | 1470.7687 | 735.17 | 2 ##### | 2.92 | 0.43 |
| KDFLAGGIAAAVSKT       | 1219.6681 | 609.77 | 2 ##### | 2.86 | 0.13 |
| KDFLAGGIAAAVSKT       | 1219.6681 | 609.78 | 2 ##### | 3.10 | 0.11 |
| KDFLAGGIAAAVSKT       | 1219.6681 | 609.77 | 2 ##### | 3.52 | 0.13 |
| KDFLAGGVAAAI SKT      | 1219.6681 | 609.70 | 2 ##### | 3.60 | 0.28 |
| KDFLAGGVAAAI SKT      | 1219.6681 | 609.63 | 2 ##### | 3.74 | 0.40 |
| KDFLAGGVAAAI SKT      | 1219.6681 | 609.67 | 2 ##### | 3.85 | 0.33 |
| KDFSATDLTEFAARA       | 1443.6750 | 721.53 | 2 ##### | 4.15 | 0.61 |
| KDFSATDLTEFAARA       | 1443.6750 | 721.53 | 2 ##### | 4.73 | 0.62 |
| KDFTPAAQA AFQKV       | 1294.6426 | 647.11 | 2 ##### | 2.52 | 0.42 |
| KDGLAFNALIHRH         | 1226.6641 | 613.15 | 2 ##### | 2.51 | 0.37 |
| KDIPVLVATDVAARG       | 1339.7579 | 669.72 | 2 ##### | 2.62 | 0.32 |
| KDIPVLVATDVAARG       | 1339.7579 | 669.65 | 2 ##### | 3.15 | 0.47 |
| KDLGTDSQIFISRA        | 1351.6852 | 675.64 | 2 ##### | 2.99 | 0.41 |
| KDQVANS AFVERL        | 1235.6014 | 617.56 | 2 ##### | 2.73 | 0.48 |
| KDQVANS AFVERL        | 1235.6014 | 617.54 | 2 ##### | 3.36 | 0.52 |
| KDSYVGDEA QSKR        | 1198.5222 | 599.03 | 2 ##### | 2.53 | 0.46 |
| KDSYVGDEA QSKR        | 1198.5222 | 598.99 | 2 ##### | 2.55 | 0.53 |
| KDSYVGDEA QSKR        | 1198.5222 | 599.05 | 2 ##### | 2.55 | 0.41 |
| KDSYVGDEA QSKR        | 1198.5222 | 599.06 | 2 ##### | 2.75 | 0.41 |
| KDSYVGDEA QSKR        | 1198.5222 | 599.03 | 2 ##### | 2.95 | 0.47 |
| KDSYVGDEA QSKR        | 1198.5222 | 599.01 | 2 ##### | 3.38 | 0.50 |
| KDSYVGDEA QSKR        | 1198.5222 | 598.99 | 2 ##### | 3.50 | 0.54 |
| KDSYVGDEA QSKRG       | 1354.6233 | 677.04 | 2 ##### | 3.22 | 0.54 |

|                    |           |        |         |      |      |
|--------------------|-----------|--------|---------|------|------|
| KDSYVGDEAQS KR G   | 1354.6233 | 677.03 | 2 ##### | 3.24 | 0.57 |
| KDTGKTPVEPEVAIHRI  | 1648.8654 | 549.44 | 3 ##### | 3.81 | 0.54 |
| KDTGKTPVEPEVAIHRI  | 1648.8654 | 549.43 | 3 ##### | 4.79 | 0.59 |
| KDTNGSQFFITTVKT    | 1457.7271 | 728.72 | 2 ##### | 2.70 | 0.29 |
| KDVNAAIATIKT       | 1015.5782 | 507.54 | 2 ##### | 2.65 | 0.49 |
| KDVNAAIATIKT       | 1015.5782 | 507.60 | 2 ##### | 2.74 | 0.39 |
| KDVNAAIATIKT       | 1015.5782 | 507.57 | 2 ##### | 2.74 | 0.44 |
| KDVNAAIATIKT       | 1015.5782 | 507.58 | 2 ##### | 2.76 | 0.41 |
| KDVNAAIATIKT       | 1015.5782 | 507.55 | 2 ##### | 2.90 | 0.48 |
| KEAAENSLVAYKA      | 1194.6001 | 597.04 | 2 ##### | 2.82 | 0.51 |
| KEAFQEALAAAGDKL    | 1320.6431 | 660.12 | 2 ##### | 2.97 | 0.40 |
| KEDQTEYLEERR       | 1311.5699 | 655.59 | 2 ##### | 2.85 | 0.39 |
| KEGGLGPLNIPLADVTKS | 1706.9688 | 853.18 | 2 ##### | 4.66 | 0.61 |
| KELEEEVSNFQKK      | 1351.6376 | 675.69 | 2 ##### | 2.83 | 0.26 |
| KELEEIVQPIISKL     | 1397.7886 | 698.71 | 2 ##### | 2.79 | 0.38 |
| KELEEIVQPIISKL     | 1397.7886 | 698.67 | 2 ##### | 3.04 | 0.44 |
| KELEEIVQPIISKL     | 1397.7886 | 698.68 | 2 ##### | 3.23 | 0.44 |
| KELEEIVQPIISKL     | 1397.7886 | 698.66 | 2 ##### | 3.36 | 0.47 |
| KELEEIVQPIISKL     | 1397.7886 | 698.67 | 2 ##### | 3.59 | 0.45 |
| KELEEIVQPIISKL     | 1397.7886 | 698.63 | 2 ##### | 3.88 | 0.53 |
| KELEEIVQPIISKL     | 1397.7886 | 698.67 | 2 ##### | 3.99 | 0.45 |
| KELLLQPVTISR N     | 1268.7572 | 634.24 | 2 ##### | 2.85 | 0.28 |
| KELLLQPVTISR N     | 1268.7572 | 634.20 | 2 ##### | 3.00 | 0.35 |
| KEVVEEAENGRD       | 1131.5277 | 565.69 | 2 ##### | 2.57 | 0.15 |
| KEVVEEAENGRD       | 1131.5277 | 565.64 | 2 ##### | 2.70 | 0.25 |
| KEVVEEAENGRD       | 1131.5277 | 565.56 | 2 ##### | 2.81 | 0.41 |
| KEVVEEAENGRD       | 1131.5277 | 565.56 | 2 ##### | 2.87 | 0.40 |
| KEVVEEAENGRD       | 1131.5277 | 565.54 | 2 ##### | 3.05 | 0.44 |
| KEVVEEAENGRD       | 1131.5277 | 565.60 | 2 ##### | 3.20 | 0.33 |
| KEVVEEAENGRD       | 1131.5277 | 565.65 | 2 ##### | 3.48 | 0.22 |
| KFAAATGATPIAGR F   | 1203.6481 | 601.65 | 2 ##### | 2.88 | 0.34 |
| KFAAATGATPIAGR F   | 1203.6481 | 601.56 | 2 ##### | 3.47 | 0.52 |
| KFAAATGATPIAGR F   | 1203.6481 | 601.55 | 2 ##### | 3.84 | 0.55 |
| KFAAATGATPIAGR F   | 1203.6481 | 601.58 | 2 ##### | 3.96 | 0.48 |
| KFAAATGATPIAGR F   | 1203.6481 | 601.56 | 2 ##### | 4.37 | 0.52 |
| KFDASFFGVHPKQ      | 1251.6157 | 625.61 | 2 ##### | 2.62 | 0.40 |
| KFGYVDFESAEDLEKA   | 1648.7377 | 824.08 | 2 ##### | 4.40 | 0.57 |
| KFGYVDFESAEDLEKA   | 1648.7377 | 824.07 | 2 ##### | 4.79 | 0.59 |
| KFYEEVHDLERK       | 1336.6168 | 668.05 | 2 ##### | 2.74 | 0.52 |
| KFYEEVHDLERK       | 1336.6168 | 668.04 | 2 ##### | 2.84 | 0.53 |
| KGDATVSYEDPPTAKA   | 1450.6697 | 725.07 | 2 ##### | 3.25 | 0.52 |
| KGDATVSYEDPPTAKA   | 1450.6697 | 725.07 | 2 ##### | 3.47 | 0.53 |
| KGFGFVDFNSEEDAKA   | 1561.6805 | 780.58 | 2 ##### | 3.67 | 0.52 |
| KGFGFVDFNSEEDAKA   | 1561.6805 | 780.58 | 2 ##### | 4.08 | 0.51 |
| KGFGFVDFNSEEDAKA   | 1561.6805 | 780.55 | 2 ##### | 4.18 | 0.59 |
| KGFGFVDFNSEEDAKA   | 1561.6805 | 780.56 | 2 ##### | 4.21 | 0.56 |
| KGFP TIYFSPANKK    | 1341.6837 | 670.75 | 2 ##### | 2.72 | 0.18 |
| KGFP TIYFSPANKK    | 1341.6837 | 670.68 | 2 ##### | 2.74 | 0.32 |
| KGFP TIYFSPANKK    | 1341.6837 | 670.67 | 2 ##### | 3.10 | 0.35 |
| KGIDPFSLDALAKE     | 1246.6677 | 623.10 | 2 ##### | 2.51 | 0.47 |
| KGIDPFSLDALAKE     | 1246.6677 | 623.09 | 2 ##### | 2.69 | 0.48 |
| KGIHPTIISESFQKA    | 1456.7794 | 728.14 | 2 ##### | 2.90 | 0.50 |
| KGIHPTIISESFQKA    | 1456.7794 | 728.15 | 2 ##### | 3.01 | 0.47 |
| KGILAADESTGSI AKR  | 1332.7006 | 666.13 | 2 ##### | 2.53 | 0.45 |
| KGILAADESTGSI AKR  | 1332.7006 | 666.04 | 2 ##### | 3.89 | 0.62 |
| KGILAADESTGSI AKR  | 1332.7006 | 666.08 | 2 ##### | 3.95 | 0.54 |

|                    |           |        |   |       |      |      |
|--------------------|-----------|--------|---|-------|------|------|
| KGILAADESTGSIKR    | 1332.7006 | 666.04 | 2 | ##### | 4.00 | 0.61 |
| KGILAADESTGSIKR    | 1332.7006 | 666.06 | 2 | ##### | 4.01 | 0.58 |
| KGLAITFVSDENDAKI   | 1479.7325 | 739.54 | 2 | ##### | 4.34 | 0.66 |
| KGLAVTFVSDENDAKI   | 1465.7169 | 732.59 | 2 | ##### | 3.25 | 0.55 |
| KGLAVTFVSDENDAKI   | 1465.7169 | 732.66 | 2 | ##### | 3.36 | 0.39 |
| KGLSEDTEETLKE      | 1322.6322 | 661.02 | 2 | ##### | 3.00 | 0.60 |
| KGLSEDTEETLKE      | 1322.6322 | 661.08 | 2 | ##### | 3.07 | 0.47 |
| KGLSEDTEETLKE      | 1322.6322 | 661.10 | 2 | ##### | 3.07 | 0.42 |
| KGPLQSVQVFRK       | 1187.6531 | 593.58 | 2 | ##### | 2.82 | 0.50 |
| KGPLQSVQVFRK       | 1187.6531 | 593.56 | 2 | ##### | 2.91 | 0.54 |
| KGPLQSVQVFRK       | 1187.6531 | 593.54 | 2 | ##### | 3.01 | 0.58 |
| KGSFSEQGINEFLRE    | 1483.7175 | 741.62 | 2 | ##### | 2.98 | 0.47 |
| KSGSEEEEEIDIMELLKN | 1691.8044 | 845.83 | 2 | ##### | 2.96 | 0.15 |
| KGVVEVTHDLQKH      | 1224.6583 | 612.18 | 2 | ##### | 2.50 | 0.30 |
| KGVVEVTHDLQKH      | 1224.6583 | 612.18 | 2 | ##### | 2.65 | 0.29 |
| KGVVEVTHDLQKH      | 1224.6583 | 612.12 | 2 | ##### | 3.12 | 0.42 |
| KGVVEVTHDLQKH      | 1224.6583 | 612.16 | 2 | ##### | 3.16 | 0.35 |
| KGVVEVTHDLQKH      | 1224.6583 | 612.10 | 2 | ##### | 3.17 | 0.47 |
| KGVVEVTHDLQKH      | 1224.6583 | 612.14 | 2 | ##### | 3.24 | 0.38 |
| KGVVEVTHDLQKH      | 1224.6583 | 612.15 | 2 | ##### | 3.36 | 0.35 |
| KGVVEVTHDLQKH      | 1224.6583 | 612.14 | 2 | ##### | 3.36 | 0.38 |
| KGVVEVTHDLQKH      | 1224.6583 | 612.13 | 2 | ##### | 3.54 | 0.39 |
| KGVVEVTHDLQKH      | 1224.6583 | 612.12 | 2 | ##### | 3.72 | 0.42 |
| KGVDVIAQAQSGTGKT   | 1394.6910 | 697.10 | 2 | ##### | 3.21 | 0.49 |
| KGVDVIAQAQSGTGKT   | 1394.6910 | 697.04 | 2 | ##### | 3.59 | 0.61 |
| KGVDVIAQAQSGTGKT   | 1394.6910 | 697.03 | 2 | ##### | 4.24 | 0.64 |
| KGVDVIAQAQSGTGKT   | 1394.6910 | 697.02 | 2 | ##### | 4.91 | 0.65 |
| KGVDVIAQAQSGTGKT   | 1394.6910 | 697.02 | 2 | ##### | 4.93 | 0.65 |
| KGVDVIAQAQSGTGKT   | 1394.6910 | 697.02 | 2 | ##### | 4.98 | 0.66 |
| KGVDVIAQAQSGTGKT   | 1394.6910 | 697.03 | 2 | ##### | 5.06 | 0.64 |
| KGVDVIAQAQSGTGKT   | 1394.6910 | 697.04 | 2 | ##### | 5.31 | 0.61 |
| KHALIYDDLSKQ       | 1287.6943 | 643.60 | 2 | ##### | 2.76 | 0.49 |
| KHALIYDDLSKQ       | 1287.6943 | 643.60 | 2 | ##### | 2.98 | 0.50 |
| KHALIYDDLSKQ       | 1287.6943 | 643.56 | 2 | ##### | 3.10 | 0.58 |
| KHALIYDDLSKQ       | 1287.6943 | 643.57 | 2 | ##### | 3.24 | 0.56 |
| KHLAGLGLTEAIDKN    | 1337.7423 | 668.61 | 2 | ##### | 2.74 | 0.53 |
| KHLAGLGLTEAIDKN    | 1337.7423 | 668.62 | 2 | ##### | 2.91 | 0.50 |
| KHLAGLGLTEAIDKN    | 1337.7423 | 668.66 | 2 | ##### | 3.29 | 0.43 |
| KHLAGLGLTEAIDKN    | 1337.7423 | 668.67 | 2 | ##### | 3.35 | 0.39 |
| KHLAGLGLTEAIDKN    | 1337.7423 | 668.65 | 2 | ##### | 3.42 | 0.44 |
| KHLAGLGLTEAIDKNKA  | 1579.8802 | 526.47 | 3 | ##### | 3.90 | 0.46 |
| KHLAGLGLTEAIDKNKA  | 1579.8802 | 789.66 | 2 | ##### | 4.43 | 0.57 |
| KHLAGLGLTEAIDKNKA  | 1579.8802 | 526.42 | 3 | ##### | 4.48 | 0.62 |
| KHLAGLGLTEAIDKNKA  | 1579.8802 | 789.63 | 2 | ##### | 4.50 | 0.61 |
| KHLAGLGLTEAIDKNKA  | 1579.8802 | 789.68 | 2 | ##### | 4.50 | 0.52 |
| KHLAGLGLTEAIDKNKA  | 1579.8802 | 789.68 | 2 | ##### | 4.83 | 0.53 |
| KHLAGLGLTEAIDKNKA  | 1579.8802 | 526.41 | 3 | ##### | 4.84 | 0.66 |
| KHLAGLGLTEAIDKNKA  | 1579.8802 | 526.41 | 3 | ##### | 5.00 | 0.64 |
| KHLAGLGLTEAIDKNKA  | 1579.8802 | 526.43 | 3 | ##### | 5.04 | 0.60 |
| KHLEINPDHPIVETLRQ  | 1782.9497 | 594.16 | 3 | ##### | 3.03 | 0.48 |
| KHLEINPDHPIVETLRQ  | 1782.9497 | 594.19 | 3 | ##### | 3.07 | 0.39 |
| KHLEINPDHPIVETLRQ  | 1782.9497 | 594.15 | 3 | ##### | 3.18 | 0.49 |
| KHLEINPDHPIVETLRQ  | 1782.9497 | 594.13 | 3 | ##### | 3.70 | 0.57 |
| KHLEINPDHPIVETLRQ  | 1782.9497 | 594.13 | 3 | ##### | 3.96 | 0.57 |
| KHLIPAANTGESKV     | 1237.6536 | 618.64 | 2 | ##### | 2.60 | 0.37 |
| KHLIPAANTGESKV     | 1237.6536 | 618.65 | 2 | ##### | 2.62 | 0.36 |

|                    |           |        |         |      |      |
|--------------------|-----------|--------|---------|------|------|
| KIANPVEGSTDRQ      | 1158.5750 | 579.07 | 2 ##### | 2.59 | 0.43 |
| KIANPVEGSTDRQ      | 1158.5750 | 579.04 | 2 ##### | 2.98 | 0.49 |
| KIDEPLEGSERDRI     | 1259.5750 | 629.54 | 2 ##### | 3.11 | 0.49 |
| KIDEPLEGSERDRI     | 1259.5750 | 629.57 | 2 ##### | 3.26 | 0.44 |
| KIDEPLEGSERDRI     | 1259.5750 | 629.56 | 2 ##### | 3.62 | 0.46 |
| KIEDLSQQAQLAAAEKF  | 1614.8334 | 807.18 | 2 ##### | 4.41 | 0.47 |
| KIEDLSQQAQLAAAEKF  | 1614.8334 | 807.16 | 2 ##### | 4.92 | 0.52 |
| KIEDLSQQAQLAAAEKF  | 1614.8334 | 807.16 | 2 ##### | 5.18 | 0.52 |
| KIFGVTTLDIVRA      | 1233.7201 | 616.75 | 2 ##### | 2.50 | 0.21 |
| KIFGVTTLDIVRA      | 1233.7201 | 616.72 | 2 ##### | 2.68 | 0.28 |
| KIFGVTTLDIVRA      | 1233.7201 | 616.74 | 2 ##### | 2.79 | 0.23 |
| KIFVGGLNPEATEEKI   | 1503.7689 | 751.61 | 2 ##### | 3.94 | 0.55 |
| KIFVGGLNPEATEEKI   | 1503.7689 | 751.58 | 2 ##### | 4.18 | 0.60 |
| KIFVGGLNPEATEEKI   | 1503.7689 | 751.65 | 2 ##### | 4.41 | 0.46 |
| KIFVGGLNPEATEEKI   | 1503.7689 | 751.63 | 2 ##### | 4.49 | 0.52 |
| KIFVGGLNPEATEEKI   | 1503.7689 | 751.64 | 2 ##### | 4.55 | 0.50 |
| KIFVGGLNPEATEEKI   | 1503.7689 | 751.67 | 2 ##### | 4.61 | 0.43 |
| KIFVGGLSPDTPPEEKI  | 1488.7581 | 744.21 | 2 ##### | 2.50 | 0.33 |
| KIFVGGLSPDTPPEEKI  | 1488.7581 | 744.17 | 2 ##### | 2.93 | 0.41 |
| KIFVGGLSPDTPPEEKI  | 1488.7581 | 744.12 | 2 ##### | 3.06 | 0.52 |
| KIFVGGLSPDTPPEEKI  | 1488.7581 | 744.13 | 2 ##### | 3.32 | 0.51 |
| KIFVGGLSPDTPPEEKI  | 1488.7581 | 744.13 | 2 ##### | 3.61 | 0.51 |
| KIFVGGLSPDTPPEEKI  | 1488.7581 | 744.12 | 2 ##### | 4.24 | 0.52 |
| KIFVGGLSPDTPPEEKI  | 1488.7581 | 744.12 | 2 ##### | 4.26 | 0.52 |
| KIFVGGLSPDTPPEEKI  | 1488.7581 | 744.11 | 2 ##### | 4.32 | 0.54 |
| KIGGHGAEYGAEALERM  | 1529.7343 | 764.62 | 2 ##### | 3.47 | 0.48 |
| KIGGHGAEYGAEALERM  | 1529.7343 | 509.82 | 3 ##### | 3.49 | 0.29 |
| KIGGHGAEYGAEALERM  | 1529.7343 | 764.59 | 2 ##### | 3.63 | 0.56 |
| KIGGHGAEYGAEALERM  | 1529.7343 | 764.62 | 2 ##### | 3.85 | 0.50 |
| KIGGHGAEYGAEALERM  | 1529.7343 | 764.62 | 2 ##### | 3.98 | 0.50 |
| KIGGIGTVPVGRV      | 1025.6102 | 512.60 | 2 ##### | 2.69 | 0.40 |
| KIGGIGTVPVGRV      | 1025.6102 | 512.62 | 2 ##### | 2.73 | 0.37 |
| KIGGIGTVPVGRV      | 1025.6102 | 512.63 | 2 ##### | 2.81 | 0.35 |
| KIGGIGTVPVGRV      | 1025.6102 | 512.59 | 2 ##### | 2.85 | 0.42 |
| KIGGIGTVPVGRV      | 1025.6102 | 512.62 | 2 ##### | 2.88 | 0.36 |
| KIGGIGTVPVGRV      | 1025.6102 | 512.62 | 2 ##### | 2.89 | 0.36 |
| KIGGIGTVPVGRV      | 1025.6102 | 512.58 | 2 ##### | 2.90 | 0.45 |
| KIGGIGTVPVGRV      | 1025.6102 | 512.61 | 2 ##### | 2.91 | 0.39 |
| KIGGIGTVPVGRV      | 1025.6102 | 512.58 | 2 ##### | 2.93 | 0.44 |
| KIGGIGTVPVGRV      | 1025.6102 | 512.62 | 2 ##### | 2.95 | 0.38 |
| KIGGIGTVPVGRV      | 1025.6102 | 512.61 | 2 ##### | 3.08 | 0.40 |
| KIGGIGTVPVGRV      | 1025.6102 | 512.58 | 2 ##### | 3.11 | 0.46 |
| KIGGIGTVPVGRV      | 1025.6102 | 512.60 | 2 ##### | 3.17 | 0.42 |
| KIGGIGTVPVGRV      | 1025.6102 | 512.58 | 2 ##### | 3.33 | 0.45 |
| KIGGIGTVPVGRV      | 1025.6102 | 512.59 | 2 ##### | 3.39 | 0.42 |
| KIGGIGTVPVGRV      | 1025.6102 | 512.60 | 2 ##### | 3.49 | 0.41 |
| KIILDISESPIKG      | 1340.8036 | 670.15 | 2 ##### | 3.61 | 0.50 |
| KIILDISESPIKG      | 1340.8036 | 670.15 | 2 ##### | 3.72 | 0.50 |
| KIILDISESPIKG      | 1340.8036 | 670.13 | 2 ##### | 3.75 | 0.54 |
| KIIQLDDYPKC        | 1217.6776 | 608.71 | 2 ##### | 2.61 | 0.26 |
| KIIQLDDYPKC        | 1217.6776 | 608.64 | 2 ##### | 3.02 | 0.41 |
| KIIVDELKQEVISTSSKA | 1788.9954 | 894.26 | 2 ##### | 3.43 | 0.48 |
| KIKGEHPGLSIGDVAKK  | 1520.8431 | 760.17 | 2 ##### | 3.21 | 0.50 |
| KIKGEHPGLSIGDVAKK  | 1520.8431 | 506.76 | 3 ##### | 3.39 | 0.56 |
| KIKGEHPGLSIGDVAKK  | 1520.8431 | 506.76 | 3 ##### | 3.53 | 0.55 |
| KIKGEHPGLSIGDVAKK  | 1520.8431 | 760.16 | 2 ##### | 3.59 | 0.52 |



|                     |           |        |         |      |      |
|---------------------|-----------|--------|---------|------|------|
| KIKGEHPGLSIGDVAKK   | 1520.8431 | 506.74 | 3 ##### | 3.64 | 0.63 |
| KIKGEHPGLSIGDVAKK   | 1520.8431 | 760.13 | 2 ##### | 3.94 | 0.58 |
| KIKIEHPGLSIGDTAKK   | 1578.8850 | 789.16 | 2 ##### | 3.16 | 0.56 |
| KILLAELEQLKG        | 1169.7140 | 584.71 | 2 ##### | 2.83 | 0.30 |
| KILLAELEQLKG        | 1169.7140 | 584.71 | 2 ##### | 3.01 | 0.30 |
| KILLAELEQLKG        | 1169.7140 | 584.73 | 2 ##### | 3.02 | 0.25 |
| KILLAELEQLKG        | 1169.7140 | 584.76 | 2 ##### | 3.06 | 0.20 |
| KILLAELEQLKG        | 1169.7140 | 584.72 | 2 ##### | 3.14 | 0.27 |
| KILLAELEQLKG        | 1169.7140 | 584.72 | 2 ##### | 3.30 | 0.28 |
| KILLAELEQLKG        | 1169.7140 | 584.73 | 2 ##### | 3.31 | 0.26 |
| KILTFDQLALESPKG     | 1474.8152 | 737.35 | 2 ##### | 3.26 | 0.12 |
| KILTFDQLALESPKG     | 1474.8152 | 737.17 | 2 ##### | 3.47 | 0.47 |
| KILTFDQLALESPKG     | 1474.8152 | 737.17 | 2 ##### | 3.54 | 0.47 |
| KILTFDQLALESPKG     | 1474.8152 | 737.20 | 2 ##### | 4.16 | 0.42 |
| KILTFDQLALESPKG     | 1474.8152 | 737.20 | 2 ##### | 4.23 | 0.42 |
| KILTFDQLALESPKG     | 1474.8152 | 737.17 | 2 ##### | 4.39 | 0.48 |
| KILTFDQLALESPKG     | 1474.8152 | 737.18 | 2 ##### | 4.52 | 0.45 |
| KINEVQTDVSVDTKH     | 1447.7275 | 723.62 | 2 ##### | 3.14 | 0.50 |
| KISSLLEEQFQQGKL     | 1506.7799 | 753.17 | 2 ##### | 3.82 | 0.45 |
| KISSLLEEQFQQGKL     | 1506.7799 | 753.16 | 2 ##### | 3.99 | 0.47 |
| KISSLLEEQFQQGKL     | 1506.7799 | 753.16 | 2 ##### | 4.12 | 0.46 |
| KITGEAFVQFASQELAEKA | 1867.9436 | 933.69 | 2 ##### | 5.37 | 0.56 |
| KIVQAEGEAEAAKM      | 1215.6216 | 607.57 | 2 ##### | 2.52 | 0.48 |
| KIVQAEGEAEAAKM      | 1215.6216 | 607.58 | 2 ##### | 2.91 | 0.47 |
| KIVQAEGEAEAAKM      | 1215.6216 | 607.58 | 2 ##### | 2.99 | 0.46 |
| KIVQAEGEAEAAKM      | 1215.6216 | 607.57 | 2 ##### | 3.38 | 0.48 |
| KIVQAEGEAEAAKM      | 1215.6216 | 607.50 | 2 ##### | 3.55 | 0.61 |
| KIVQAEGEAEAAKM      | 1215.6216 | 607.54 | 2 ##### | 3.87 | 0.55 |
| KIVQAEGEAEAAKM      | 1215.6216 | 607.51 | 2 ##### | 3.95 | 0.60 |
| KIVSNASCTTNCLAPLAKV | 1705.8612 | 852.73 | 2 ##### | 2.60 | 0.40 |
| KIVSNASCTTNCLAPLAKV | 1705.8612 | 852.76 | 2 ##### | 2.91 | 0.35 |
| KKDDEENYLDLFSHKN    | 1752.8075 | 584.16 | 3 ##### | 3.25 | 0.34 |
| KKEEELQGALARG       | 1243.6641 | 621.71 | 2 ##### | 2.82 | 0.25 |
| KKEEELQGALARG       | 1243.6641 | 621.74 | 2 ##### | 2.97 | 0.19 |
| KKEEELQGALARG       | 1243.6641 | 621.70 | 2 ##### | 3.32 | 0.26 |
| KKEELTLEGIRQ        | 1187.6631 | 593.72 | 2 ##### | 3.01 | 0.22 |
| KKELSDIAHRI         | 1068.5796 | 534.13 | 2 ##### | 2.60 | 0.31 |
| KKHPDASVNFSEFSKK    | 1592.7704 | 530.78 | 3 ##### | 3.19 | 0.44 |
| KKHPDASVNFSEFSKK    | 1592.7704 | 530.80 | 3 ##### | 3.75 | 0.38 |
| KKHPDASVNFSEFSKK    | 1592.7704 | 530.79 | 3 ##### | 4.03 | 0.39 |
| KKLEAAATALTKS       | 1187.6995 | 593.62 | 2 ##### | 3.78 | 0.45 |
| KKPLPDHVSIVPEKD     | 1458.8315 | 729.20 | 2 ##### | 2.86 | 0.43 |
| KKPLPDHVSIVPEKD     | 1458.8315 | 729.17 | 2 ##### | 3.04 | 0.49 |
| KKPLPDHVSIVPEKD     | 1458.8315 | 486.14 | 3 ##### | 4.12 | 0.41 |
| KKSDVEAIFSKY        | 1123.5994 | 561.59 | 2 ##### | 2.98 | 0.42 |
| KKVLTAFGESIKN       | 1192.6936 | 596.08 | 2 ##### | 2.83 | 0.54 |
| KKVLTAFGESIKN       | 1192.6936 | 596.15 | 2 ##### | 3.01 | 0.40 |
| KKVLTAFGESIKN       | 1192.6936 | 596.08 | 2 ##### | 3.06 | 0.54 |
| KKVLTAFGESIKN       | 1192.6936 | 596.07 | 2 ##### | 3.24 | 0.56 |
| KKVLTAFGESIKN       | 1192.6936 | 596.12 | 2 ##### | 3.27 | 0.45 |
| KLFVTNDAATILRE      | 1333.7474 | 666.75 | 2 ##### | 2.79 | 0.25 |
| KLFVTNDAATILRE      | 1333.7474 | 666.72 | 2 ##### | 2.79 | 0.31 |
| KLFVTNDAATILRE      | 1333.7474 | 666.72 | 2 ##### | 3.00 | 0.31 |
| KLFVTNDAATILRE      | 1333.7474 | 666.66 | 2 ##### | 3.15 | 0.43 |
| KLFVTNDAATILRE      | 1333.7474 | 666.67 | 2 ##### | 3.35 | 0.41 |
| KLFVTNDAATILRE      | 1333.7474 | 666.66 | 2 ##### | 3.53 | 0.43 |

|                    |           |        |         |      |      |
|--------------------|-----------|--------|---------|------|------|
| KLGEYGFQNAILVRY    | 1479.7954 | 739.65 | 2 ##### | 2.80 | 0.50 |
| KLGEYGFQNAILVRY    | 1479.7954 | 739.67 | 2 ##### | 2.90 | 0.46 |
| KLGEYGFQNAILVRY    | 1479.7954 | 739.64 | 2 ##### | 3.02 | 0.52 |
| KLGEYGFQNAILVRY    | 1479.7954 | 739.69 | 2 ##### | 3.07 | 0.42 |
| KLGEYGFQNAILVRY    | 1479.7954 | 739.66 | 2 ##### | 3.09 | 0.47 |
| KLGEYGFQNAILVRY    | 1479.7954 | 739.72 | 2 ##### | 3.15 | 0.35 |
| KLGEYGFQNAILVRY    | 1479.7954 | 739.62 | 2 ##### | 3.26 | 0.56 |
| KLGEYGFQNAILVRY    | 1479.7954 | 739.63 | 2 ##### | 3.29 | 0.54 |
| KLGEYGFQNAILVRY    | 1479.7954 | 739.66 | 2 ##### | 3.44 | 0.48 |
| KLGEYGFQNAILVRY    | 1479.7954 | 739.61 | 2 ##### | 3.50 | 0.58 |
| KLGEYGFQNAILVRY    | 1479.7954 | 739.68 | 2 ##### | 3.60 | 0.45 |
| KLGEYGFQNAILVRY    | 1479.7954 | 739.62 | 2 ##### | 3.70 | 0.56 |
| KLGEYGFQNAILVRY    | 1479.7954 | 739.63 | 2 ##### | 3.72 | 0.54 |
| KLGEYGFQNAILVRY    | 1479.7954 | 739.65 | 2 ##### | 3.74 | 0.49 |
| KLGEYGFQNAILVRY    | 1479.7954 | 739.64 | 2 ##### | 3.85 | 0.51 |
| KLGGSAVISLEGKPL    | 1340.7784 | 670.20 | 2 ##### | 3.24 | 0.37 |
| KLGVIEDHSNRT       | 1139.5803 | 569.61 | 2 ##### | 2.75 | 0.36 |
| KLGVIEDHSNRT       | 1139.5803 | 569.62 | 2 ##### | 3.36 | 0.34 |
| KLIASVADDEAAVPNNKI | 1626.8334 | 813.17 | 2 ##### | 3.21 | 0.49 |
| KLIASVADDEAAVPNNKI | 1626.8334 | 813.15 | 2 ##### | 3.48 | 0.53 |
| KLKDDEVAQLRK       | 1186.6426 | 593.14 | 2 ##### | 3.19 | 0.36 |
| KLLLQVQHASKQ       | 1136.6786 | 568.19 | 2 ##### | 2.53 | 0.30 |
| KLLLQVQHASKQ       | 1136.6786 | 568.08 | 2 ##### | 2.61 | 0.51 |
| KLLLQVQHASKQ       | 1136.6786 | 568.21 | 2 ##### | 2.66 | 0.26 |
| KLLLQVQHASKQ       | 1136.6786 | 568.09 | 2 ##### | 2.69 | 0.51 |
| KLLLQVQHASKQ       | 1136.6786 | 568.16 | 2 ##### | 2.70 | 0.35 |
| KLLLQVQHASKQ       | 1136.6786 | 568.13 | 2 ##### | 2.79 | 0.42 |
| KLRDEEVHTGLGELLRS  | 1736.9290 | 578.83 | 3 ##### | 3.12 | 0.44 |
| KLSELHAYILRV       | 1214.6892 | 607.15 | 2 ##### | 2.55 | 0.39 |
| KLSELHAYILRV       | 1214.6892 | 607.21 | 2 ##### | 3.04 | 0.28 |
| KLSELHAYILRV       | 1214.6892 | 607.18 | 2 ##### | 3.56 | 0.32 |
| KLVAGVATALSHKY     | 1166.6892 | 583.18 | 2 ##### | 2.71 | 0.34 |
| KLVAGVATALSHKY     | 1166.6892 | 583.24 | 2 ##### | 2.85 | 0.22 |
| KLVAGVATALSHKY     | 1166.6892 | 583.18 | 2 ##### | 2.98 | 0.34 |
| KLVAGVATALSHKY     | 1166.6892 | 583.23 | 2 ##### | 3.05 | 0.23 |
| KLVAGVATALSHKY     | 1166.6892 | 583.28 | 2 ##### | 3.08 | 0.14 |
| KLVAGVATALSHKY     | 1166.6892 | 583.18 | 2 ##### | 3.41 | 0.32 |
| KNAGVEGSLIVEKI     | 1215.6580 | 607.66 | 2 ##### | 2.50 | 0.34 |
| KNAGVEGSLIVEKI     | 1215.6580 | 607.62 | 2 ##### | 2.65 | 0.41 |
| KNAGVEGSLIVEKI     | 1215.6580 | 607.68 | 2 ##### | 2.84 | 0.30 |
| KNAGVEGSLIVEKI     | 1215.6580 | 607.71 | 2 ##### | 2.86 | 0.24 |
| KNAGVEGSLIVEKI     | 1215.6580 | 607.65 | 2 ##### | 3.06 | 0.36 |
| KNAGVEGSLIVEKI     | 1215.6580 | 607.65 | 2 ##### | 3.28 | 0.37 |
| KNAGVEGSLIVEKI     | 1215.6580 | 607.61 | 2 ##### | 3.36 | 0.45 |
| KNAGVEGSLIVEKI     | 1215.6580 | 607.62 | 2 ##### | 3.43 | 0.41 |
| KNLLHVTDGTGVMTR    | 1529.7785 | 764.67 | 2 ##### | 3.48 | 0.44 |
| KNLLHVTDGTGVMTR    | 1529.7785 | 764.63 | 2 ##### | 3.65 | 0.51 |
| KNLQYYDISAKS       | 1214.6052 | 607.09 | 2 ##### | 2.55 | 0.42 |
| KNLQYYDISAKS       | 1214.6052 | 607.13 | 2 ##### | 2.69 | 0.34 |
| KNLQYYDISAKS       | 1214.6052 | 607.20 | 2 ##### | 2.77 | 0.21 |
| KNNASTDYDLSDKS     | 1342.5757 | 671.08 | 2 ##### | 2.82 | 0.42 |
| KNNASTDYDLSDKS     | 1342.5757 | 671.08 | 2 ##### | 2.98 | 0.42 |
| KNVTELNEPLSNEERN   | 1643.7871 | 821.62 | 2 ##### | 4.25 | 0.55 |
| KRISGLIYEETR       | 1336.7219 | 668.21 | 2 ##### | 2.54 | 0.29 |
| KRISGLIYEETR       | 1336.7219 | 668.17 | 2 ##### | 2.61 | 0.38 |
| KSAAQAAAQTNSNAAGKQ | 1460.7089 | 730.20 | 2 ##### | 2.65 | 0.30 |

|                      |           |        |         |      |      |
|----------------------|-----------|--------|---------|------|------|
| KSAAQAAAQTSNAAGKQ    | 1460.7089 | 730.07 | 2 ##### | 3.56 | 0.58 |
| KSAAQAAAQTSNAAGKQ    | 1460.7089 | 730.05 | 2 ##### | 4.79 | 0.61 |
| KSAAQAAAQTSNAAGKQ    | 1460.7089 | 730.05 | 2 ##### | 4.97 | 0.61 |
| KSAPDFTATAVVDGAFKE   | 1596.7904 | 798.09 | 2 ##### | 3.69 | 0.61 |
| KSAPDFTATAVVDGAFKE   | 1596.7904 | 798.09 | 2 ##### | 3.75 | 0.61 |
| KSAPDFTATAVVDGAFKE   | 1596.7904 | 798.06 | 2 ##### | 3.90 | 0.67 |
| KSAPDFTATAVVDGAFKE   | 1596.7904 | 798.08 | 2 ##### | 3.99 | 0.62 |
| KSAPDFTATAVVDGAFKE   | 1596.7904 | 798.09 | 2 ##### | 4.39 | 0.60 |
| KSEADAENLLEEKQ       | 1362.6383 | 681.16 | 2 ##### | 2.73 | 0.32 |
| KSEADAENLLEEKQ       | 1362.6383 | 681.16 | 2 ##### | 3.27 | 0.32 |
| KSEADAENLLEEKQ       | 1362.6383 | 681.12 | 2 ##### | 3.36 | 0.39 |
| KSESPKEPEQLRK        | 1299.6539 | 649.69 | 2 ##### | 2.69 | 0.27 |
| KSESPKEPEQLRK        | 1299.6539 | 649.66 | 2 ##### | 2.74 | 0.33 |
| KSESPKEPEQLRK        | 1299.6539 | 649.70 | 2 ##### | 2.91 | 0.26 |
| KSESPKEPEQLRK        | 1299.6539 | 649.65 | 2 ##### | 2.97 | 0.36 |
| KSIDNLSSALTKL        | 1148.6157 | 574.18 | 2 ##### | 2.65 | 0.25 |
| KSIDNLSSALTKL        | 1148.6157 | 574.12 | 2 ##### | 2.72 | 0.38 |
| KSIDNLSSALTKL        | 1148.6157 | 574.07 | 2 ##### | 2.90 | 0.47 |
| KSIDNLSSALTKL        | 1148.6157 | 574.14 | 2 ##### | 2.98 | 0.33 |
| KSIDNLSSALTKL        | 1148.6157 | 574.08 | 2 ##### | 3.02 | 0.46 |
| KSIDNLSSALTKL        | 1148.6157 | 574.15 | 2 ##### | 3.04 | 0.32 |
| KSIDNLSSALTKL        | 1148.6157 | 574.06 | 2 ##### | 3.14 | 0.49 |
| KSIDNLSSALTKL        | 1148.6157 | 574.07 | 2 ##### | 3.36 | 0.48 |
| KSIDNLSSALTKL        | 1148.6157 | 574.03 | 2 ##### | 3.42 | 0.55 |
| KSIDNLSSALTKL        | 1148.6157 | 574.04 | 2 ##### | 3.49 | 0.53 |
| KSIDNLSSALTKL        | 1148.6157 | 574.04 | 2 ##### | 3.63 | 0.54 |
| KSIDNLSSALTKL        | 1148.6157 | 574.05 | 2 ##### | 3.65 | 0.51 |
| KSIDNLSSALTKL        | 1148.6157 | 574.06 | 2 ##### | 3.85 | 0.50 |
| KSILFVPTSAPRG        | 1187.6782 | 593.67 | 2 ##### | 3.12 | 0.34 |
| KSILFVPTSAPRG        | 1187.6782 | 593.69 | 2 ##### | 3.20 | 0.29 |
| KSILFVPTSAPRG        | 1187.6782 | 593.63 | 2 ##### | 3.54 | 0.42 |
| KSPASDTYIVFGEAKI     | 1484.7268 | 742.05 | 2 ##### | 4.46 | 0.62 |
| KSPASDTYIVFGEAKI     | 1484.7268 | 742.06 | 2 ##### | 4.67 | 0.61 |
| KSQIHDIVLVGGSTRI     | 1481.8071 | 740.62 | 2 ##### | 3.75 | 0.57 |
| KSQIHDIVLVGGSTRI     | 1481.8071 | 740.61 | 2 ##### | 3.95 | 0.58 |
| KSQIHDIVLVGGSTRI     | 1481.8071 | 740.63 | 2 ##### | 4.12 | 0.55 |
| KSQIHDIVLVGGSTRI     | 1481.8071 | 740.59 | 2 ##### | 4.13 | 0.62 |
| KSQIHDIVLVGGSTRI     | 1481.8071 | 740.63 | 2 ##### | 4.18 | 0.55 |
| KSQIHDIVLVGGSTRI     | 1481.8071 | 740.62 | 2 ##### | 4.42 | 0.57 |
| KSQIHDIVLVGGSTRI     | 1481.8071 | 740.61 | 2 ##### | 4.47 | 0.59 |
| KSQIHDIVLVGGSTRI     | 1481.8071 | 740.60 | 2 ##### | 4.49 | 0.61 |
| KSQIHDIVLVGGSTRI     | 1481.8071 | 740.63 | 2 ##### | 4.53 | 0.55 |
| KSQIHDIVLVGGSTRI     | 1481.8071 | 740.62 | 2 ##### | 4.82 | 0.56 |
| KSSGPTSLFAVTVAPPGARQ | 1714.9122 | 857.17 | 2 ##### | 2.63 | 0.57 |
| KSTAGDTHLGGEDFDNRM   | 1691.7256 | 845.59 | 2 ##### | 4.38 | 0.54 |
| KSTESLQANVQRL        | 1232.6229 | 616.15 | 2 ##### | 3.29 | 0.33 |
| KSTESLQANVQRL        | 1232.6229 | 616.14 | 2 ##### | 3.53 | 0.34 |
| KSTESLQANVQRL        | 1232.6229 | 616.13 | 2 ##### | 3.71 | 0.36 |
| KSTESLQANVQRL        | 1232.6229 | 616.12 | 2 ##### | 3.86 | 0.39 |
| KSTFVLDEFKRRK        | 1241.6525 | 620.59 | 2 ##### | 2.56 | 0.48 |
| KSTFVLDEFKRRK        | 1241.6525 | 620.59 | 2 ##### | 2.62 | 0.48 |
| KSTFVLDEFKRRK        | 1241.6525 | 620.55 | 2 ##### | 2.74 | 0.55 |
| KSVTEQGAELSNEERN     | 1548.7136 | 774.16 | 2 ##### | 2.68 | 0.40 |
| KSVTEQGAELSNEERN     | 1548.7136 | 774.14 | 2 ##### | 4.25 | 0.43 |
| KSVTEQGAELSNEERN     | 1548.7136 | 774.10 | 2 ##### | 4.44 | 0.51 |
| KSVTEQGAELSNEERN     | 1548.7136 | 774.12 | 2 ##### | 4.55 | 0.47 |

|                        |           |         |         |      |      |
|------------------------|-----------|---------|---------|------|------|
| KSVTEQGAELSNEERN       | 1548.7136 | 774.15  | 2 ##### | 4.79 | 0.42 |
| KSVTEQGAELSNEERN       | 1548.7136 | 774.13  | 2 ##### | 4.83 | 0.46 |
| KSVTEQGAELSNEERN       | 1548.7136 | 774.07  | 2 ##### | 5.13 | 0.57 |
| KSYELPDGQVITIGNERF     | 1790.8920 | 895.18  | 2 ##### | 3.56 | 0.54 |
| KSYELPDGQVITIGNERF     | 1790.8920 | 895.18  | 2 ##### | 4.37 | 0.53 |
| KSYELPDGQVITIGNERF     | 1790.8920 | 895.21  | 2 ##### | 4.46 | 0.48 |
| KSYELPDGQVITIGNERF     | 1790.8920 | 895.16  | 2 ##### | 4.56 | 0.57 |
| KSYELPDGQVITIGNERF     | 1790.8920 | 895.17  | 2 ##### | 4.62 | 0.54 |
| KSYELPDGQVITIGNERF     | 1790.8920 | 895.23  | 2 ##### | 4.76 | 0.43 |
| KTAPYVVVTGSVDQTVKV     | 1564.8217 | 782.18  | 2 ##### | 3.50 | 0.45 |
| KTAPYVVVTGSVDQTVKV     | 1564.8217 | 782.16  | 2 ##### | 4.25 | 0.50 |
| KTAVVVGTVTDDVRI        | 1331.7166 | 665.79  | 2 ##### | 2.92 | 0.13 |
| KTAVVVGTVTDDVRI        | 1331.7166 | 665.66  | 2 ##### | 3.05 | 0.40 |
| KTAVVVGTVTDDVRI        | 1331.7166 | 665.78  | 2 ##### | 3.08 | 0.16 |
| KTAVVVGTVTDDVRI        | 1331.7166 | 665.64  | 2 ##### | 3.19 | 0.43 |
| KTAVVVGTVTDDVRI        | 1331.7166 | 665.62  | 2 ##### | 3.51 | 0.48 |
| KTAVVVGTVTDDVRI        | 1331.7166 | 665.64  | 2 ##### | 3.52 | 0.43 |
| KTAVVVGTVTDDVRI        | 1331.7166 | 665.62  | 2 ##### | 3.61 | 0.48 |
| KTAVVVGTVTDDVRI        | 1331.7166 | 665.63  | 2 ##### | 3.65 | 0.46 |
| KTAVVVGTVTDDVRI        | 1331.7166 | 665.65  | 2 ##### | 3.69 | 0.41 |
| KTAVVVGTVTDDVRI        | 1331.7166 | 665.60  | 2 ##### | 4.01 | 0.51 |
| KTFVSITPAEVLGVGKD      | 1616.9258 | 808.16  | 2 ##### | 4.35 | 0.61 |
| KTIEAEEAAHGTVTRH       | 1355.6914 | 677.57  | 2 ##### | 3.54 | 0.55 |
| KTIEAEEAAHGTVTRH       | 1355.6914 | 677.56  | 2 ##### | 3.69 | 0.57 |
| KTIEAEEAAHGTVTRH       | 1355.6914 | 677.53  | 2 ##### | 3.71 | 0.63 |
| KTIEAEEAAHGTVTRH       | 1355.6914 | 677.54  | 2 ##### | 3.75 | 0.60 |
| KTIGGGDDSFNTFFSETGAGKH | 2007.8931 | 1003.63 | 2 ##### | 3.31 | 0.64 |
| KTLNDELEIIEGMKF        | 1520.7557 | 760.20  | 2 ##### | 3.35 | 0.36 |
| KTLNDELEIIEGMKF        | 1520.7557 | 760.17  | 2 ##### | 3.88 | 0.41 |
| KTLNDELEIIEGMKF        | 1520.7557 | 760.15  | 2 ##### | 4.08 | 0.45 |
| KTLNDELEIIEGMKF        | 1520.7557 | 760.11  | 2 ##### | 4.18 | 0.54 |
| KTLVLSNLSYSATKE        | 1396.7682 | 698.13  | 2 ##### | 3.09 | 0.51 |
| KTLVLSNLSYSATKE        | 1396.7682 | 698.11  | 2 ##### | 3.63 | 0.56 |
| KTLVLSNLSYSATKE        | 1396.7682 | 698.16  | 2 ##### | 3.66 | 0.46 |
| KTLVLSNLSYSATKE        | 1396.7682 | 698.09  | 2 ##### | 3.87 | 0.59 |
| KTLVLSNLSYSATKE        | 1396.7682 | 698.07  | 2 ##### | 4.08 | 0.62 |
| KTLVLSNLSYSATKE        | 1396.7682 | 698.08  | 2 ##### | 4.12 | 0.60 |
| KTNEAQAIETARA          | 1203.5964 | 601.58  | 2 ##### | 3.49 | 0.43 |
| KTNEAQAIETARA          | 1203.5964 | 601.60  | 2 ##### | 3.60 | 0.40 |
| KTPVEPEVAIHRI          | 1247.6743 | 623.64  | 2 ##### | 2.63 | 0.39 |
| KTSFFQALGITTKI         | 1313.7100 | 656.60  | 2 ##### | 3.20 | 0.50 |
| KTSFFQALGITTKI         | 1313.7100 | 656.56  | 2 ##### | 3.26 | 0.60 |
| KTSFFQALGITTKI         | 1313.7100 | 656.55  | 2 ##### | 3.32 | 0.62 |
| KTSFFQALGITTKI         | 1313.7100 | 656.55  | 2 ##### | 3.32 | 0.60 |
| KTSFFQALGITTKI         | 1313.7100 | 656.55  | 2 ##### | 3.37 | 0.61 |
| KTSFFQALGITTKI         | 1313.7100 | 656.60  | 2 ##### | 3.70 | 0.52 |
| KTSFFQALGITTKI         | 1313.7100 | 656.53  | 2 ##### | 3.70 | 0.65 |
| KTSIAIDTIINQKR         | 1316.7421 | 658.20  | 2 ##### | 3.48 | 0.33 |
| KTVDNFVALATGEKG        | 1364.7056 | 682.26  | 2 ##### | 2.51 | 0.19 |
| KTVDNFVALATGEKG        | 1364.7056 | 682.17  | 2 ##### | 2.81 | 0.36 |
| KTVDNFVALATGEKG        | 1364.7056 | 682.21  | 2 ##### | 3.21 | 0.28 |
| KTVDNFVALATGEKG        | 1364.7056 | 682.14  | 2 ##### | 3.25 | 0.43 |
| KTVDNFVALATGEKG        | 1364.7056 | 682.14  | 2 ##### | 3.30 | 0.42 |
| KTVDNFVALATGEKG        | 1364.7056 | 682.17  | 2 ##### | 3.57 | 0.37 |
| KTVEAEEAAHGTVTRH       | 1341.6757 | 670.59  | 2 ##### | 3.62 | 0.49 |
| KTVEAEEAAHGTVTRH       | 1341.6757 | 670.64  | 2 ##### | 3.73 | 0.39 |

|                     |           |        |         |      |      |
|---------------------|-----------|--------|---------|------|------|
| KVTNNAVTVPAYFNDSQRQ | 1981.9978 | 990.70 | 2 ##### | 3.32 | 0.59 |
| KVTNNAVTVPAYFNDSQRQ | 1981.9978 | 990.69 | 2 ##### | 3.63 | 0.61 |
| KTYFPHFDVSHGSAQVKG  | 1819.8762 | 909.63 | 2 ##### | 3.02 | 0.62 |
| KTYFPHFDVSHGSAQVKG  | 1819.8762 | 606.45 | 3 ##### | 3.14 | 0.52 |
| KTYFPHFDVSHGSAQVKG  | 1819.8762 | 909.59 | 2 ##### | 3.64 | 0.69 |
| KVAGQDGSVVQFKI      | 1234.6426 | 617.07 | 2 ##### | 3.01 | 0.50 |
| KVAGQDGSVVQFKI      | 1234.6426 | 617.10 | 2 ##### | 3.22 | 0.44 |
| KVAGQDGSVVQFKI      | 1234.6426 | 617.10 | 2 ##### | 3.34 | 0.44 |
| KVAGQDGSVVQFKI      | 1234.6426 | 617.06 | 2 ##### | 3.66 | 0.52 |
| KVANVSLALYKG        | 1190.7144 | 595.15 | 2 ##### | 2.70 | 0.42 |
| KVANVSLALYKG        | 1190.7144 | 595.16 | 2 ##### | 2.80 | 0.39 |
| KVAQGVSGAVQDKG      | 1158.6113 | 579.10 | 2 ##### | 3.01 | 0.41 |
| KVAQGVSGAVQDKG      | 1158.6113 | 579.15 | 2 ##### | 3.23 | 0.32 |
| KVAQGVSGAVQDKG      | 1158.6113 | 579.12 | 2 ##### | 3.44 | 0.37 |
| KVDATEESDLAQQYGVRG  | 1780.8348 | 890.15 | 2 ##### | 4.22 | 0.54 |
| KVDATEQTDLAKR       | 1190.5900 | 595.09 | 2 ##### | 2.50 | 0.41 |
| KVDATEQTDLAKR       | 1190.5900 | 595.07 | 2 ##### | 2.95 | 0.45 |
| KVDATEQTDLAKR       | 1190.5900 | 595.01 | 2 ##### | 2.99 | 0.57 |
| KVDATEQTDLAKR       | 1190.5900 | 595.00 | 2 ##### | 3.77 | 0.58 |
| KVDFPQDQLATLTGRI    | 1560.8016 | 780.15 | 2 ##### | 3.87 | 0.50 |
| KVDFPQDQLATLTGRI    | 1560.8016 | 780.13 | 2 ##### | 4.03 | 0.53 |
| KVDNDENEHQLSLRT     | 1568.7300 | 784.22 | 2 ##### | 3.14 | 0.29 |
| KVDNDENEHQLSLRT     | 1568.7300 | 784.18 | 2 ##### | 3.20 | 0.38 |
| KVDNDENEHQLSLRT     | 1568.7300 | 784.20 | 2 ##### | 3.28 | 0.32 |
| KVEIANDQGNRT        | 1228.6281 | 614.11 | 2 ##### | 3.05 | 0.41 |
| KVEIANDQGNRT        | 1228.6281 | 614.18 | 2 ##### | 3.17 | 0.26 |
| KVEIANDQGNRT        | 1228.6281 | 614.13 | 2 ##### | 3.18 | 0.37 |
| KVEIANDQGNRT        | 1228.6281 | 614.13 | 2 ##### | 3.32 | 0.36 |
| KVEIANDQGNRT        | 1228.6281 | 614.09 | 2 ##### | 3.44 | 0.44 |
| KVEIANDQGNRT        | 1228.6281 | 614.14 | 2 ##### | 3.49 | 0.35 |
| KVEIANDQGNRT        | 1228.6281 | 614.13 | 2 ##### | 3.59 | 0.36 |
| KVFLENVIRD          | 989.5778  | 494.67 | 2 ##### | 2.50 | 0.24 |
| KVFLENVIRD          | 989.5778  | 494.68 | 2 ##### | 2.50 | 0.21 |
| KVFLENVIRD          | 989.5778  | 494.64 | 2 ##### | 2.51 | 0.30 |
| KVFLENVIRD          | 989.5778  | 494.67 | 2 ##### | 2.51 | 0.24 |
| KVFLENVIRD          | 989.5778  | 494.65 | 2 ##### | 2.54 | 0.28 |
| KVFLENVIRD          | 989.5778  | 494.65 | 2 ##### | 2.57 | 0.27 |
| KVFLENVIRD          | 989.5778  | 494.66 | 2 ##### | 2.59 | 0.25 |
| KVFLENVIRD          | 989.5778  | 494.65 | 2 ##### | 2.59 | 0.28 |
| KVFLENVIRD          | 989.5778  | 494.66 | 2 ##### | 2.61 | 0.27 |
| KVFLENVIRD          | 989.5778  | 494.65 | 2 ##### | 2.71 | 0.27 |
| KVFLENVIRD          | 989.5778  | 494.64 | 2 ##### | 2.74 | 0.30 |
| KVFLENVIRD          | 989.5778  | 494.60 | 2 ##### | 2.88 | 0.38 |
| KVFLENVIRD          | 989.5778  | 494.63 | 2 ##### | 2.94 | 0.31 |
| KVGGTSDVEVNEKK      | 1233.5957 | 616.60 | 2 ##### | 3.02 | 0.39 |
| KVGGTSDVEVNEKK      | 1233.5957 | 616.59 | 2 ##### | 3.07 | 0.41 |
| KVGINYQPPTVVPGDLAKV | 1824.9855 | 912.29 | 2 ##### | 2.54 | 0.41 |
| KVGINYQPPTVVPGDLAKV | 1824.9855 | 912.29 | 2 ##### | 2.61 | 0.40 |
| KVGINYQPPTVVPGDLAKV | 1824.9855 | 912.26 | 2 ##### | 2.81 | 0.46 |
| KVGINYQPPTVVPGDLAKV | 1824.9855 | 912.21 | 2 ##### | 3.62 | 0.57 |
| KVGINYQPPTVVPGDLAKV | 1824.9855 | 912.23 | 2 ##### | 3.92 | 0.52 |
| KVLAQNSGFDLQETLVKV  | 1761.9381 | 880.78 | 2 ##### | 3.86 | 0.38 |
| KVLAQNSGFDLQETLVKV  | 1761.9381 | 880.75 | 2 ##### | 3.95 | 0.45 |
| KVLELIQSGVAEGAKL    | 1413.7948 | 706.67 | 2 ##### | 4.44 | 0.46 |
| KVLQATVVAVGSGGKG    | 1285.7474 | 642.64 | 2 ##### | 3.09 | 0.47 |
| KVLQATVVAVGSGGKG    | 1285.7474 | 642.63 | 2 ##### | 3.68 | 0.49 |

|                    |           |        |         |      |      |
|--------------------|-----------|--------|---------|------|------|
| KVLVDINNPEPLIQTAKT | 1763.9902 | 881.80 | 2 ##### | 4.12 | 0.39 |
| KVLVDINNPEPLIQTAKT | 1763.9902 | 881.74 | 2 ##### | 4.21 | 0.51 |
| KVLVDINNPEPLIQTAKT | 1763.9902 | 881.75 | 2 ##### | 4.51 | 0.49 |
| KVNSDEVGGEALGRL    | 1302.6284 | 651.09 | 2 ##### | 3.82 | 0.44 |
| KVNVEEVGGEALGRL    | 1328.6804 | 664.18 | 2 ##### | 2.58 | 0.33 |
| KVNVEEVGGEALGRL    | 1328.6804 | 664.16 | 2 ##### | 2.58 | 0.36 |
| KVNVEEVGGEALGRL    | 1328.6804 | 664.19 | 2 ##### | 2.61 | 0.30 |
| KVNVEEVGGEALGRL    | 1328.6804 | 664.16 | 2 ##### | 2.76 | 0.35 |
| KVNVEEVGGEALGRL    | 1328.6804 | 664.16 | 2 ##### | 2.76 | 0.36 |
| KVNVEEVGGEALGRL    | 1328.6804 | 664.16 | 2 ##### | 2.77 | 0.36 |
| KVNVEEVGGEALGRL    | 1328.6804 | 664.16 | 2 ##### | 2.88 | 0.36 |
| KVNVEEVGGEALGRL    | 1328.6804 | 664.14 | 2 ##### | 2.90 | 0.40 |
| KVNVEEVGGEALGRL    | 1328.6804 | 664.17 | 2 ##### | 2.92 | 0.33 |
| KVNVEEVGGEALGRL    | 1328.6804 | 664.17 | 2 ##### | 2.95 | 0.34 |
| KVNVEEVGGEALGRL    | 1328.6804 | 664.17 | 2 ##### | 2.96 | 0.34 |
| KVNVEEVGGEALGRL    | 1328.6804 | 664.14 | 2 ##### | 3.01 | 0.40 |
| KVNVEEVGGEALGRL    | 1328.6804 | 664.12 | 2 ##### | 3.24 | 0.44 |
| KVNVEEVGGEALGRL    | 1328.6804 | 664.16 | 2 ##### | 3.25 | 0.36 |
| KVNVEEVGGEALGRL    | 1328.6804 | 664.13 | 2 ##### | 3.38 | 0.43 |
| KVNVEEVGGEALGRL    | 1328.6804 | 664.16 | 2 ##### | 3.38 | 0.36 |
| KVNVEEVGGEALGRL    | 1328.6804 | 664.14 | 2 ##### | 3.41 | 0.40 |
| KVNVEEVGGEALGRL    | 1328.6804 | 664.22 | 2 ##### | 3.46 | 0.24 |
| KVNVEEVGGEALGRL    | 1328.6804 | 664.13 | 2 ##### | 3.48 | 0.42 |
| KVNVEEVGGEALGRL    | 1328.6804 | 664.14 | 2 ##### | 3.48 | 0.40 |
| KVNVEEVGGEALGRL    | 1328.6804 | 664.14 | 2 ##### | 3.51 | 0.41 |
| KVNVEEVGGEALGRL    | 1328.6804 | 664.12 | 2 ##### | 3.52 | 0.45 |
| KVNVEEVGGEALGRL    | 1328.6804 | 664.14 | 2 ##### | 3.55 | 0.40 |
| KVNVEEVGGEALGRL    | 1328.6804 | 664.15 | 2 ##### | 3.55 | 0.38 |
| KVNVEEVGGEALGRL    | 1328.6804 | 664.15 | 2 ##### | 3.56 | 0.38 |
| KVNVEEVGGEALGRL    | 1328.6804 | 664.11 | 2 ##### | 3.56 | 0.46 |
| KVNVEEVGGEALGRL    | 1328.6804 | 664.14 | 2 ##### | 3.60 | 0.41 |
| KVNVEEVGGEALGRL    | 1328.6804 | 664.11 | 2 ##### | 3.61 | 0.45 |
| KVNVEEVGGEALGRL    | 1328.6804 | 664.14 | 2 ##### | 3.64 | 0.40 |
| KVNVEEVGGEALGRL    | 1328.6804 | 664.14 | 2 ##### | 3.64 | 0.41 |
| KVNVEEVGGEALGRL    | 1328.6804 | 664.15 | 2 ##### | 3.65 | 0.38 |
| KVNVEEVGGEALGRL    | 1328.6804 | 664.12 | 2 ##### | 3.68 | 0.43 |
| KVNVEEVGGEALGRL    | 1328.6804 | 664.15 | 2 ##### | 3.68 | 0.38 |
| KVNVEEVGGEALGRL    | 1328.6804 | 664.17 | 2 ##### | 3.68 | 0.33 |
| KVNVEEVGGEALGRL    | 1328.6804 | 664.12 | 2 ##### | 3.70 | 0.44 |
| KVNVEEVGGEALGRL    | 1328.6804 | 664.14 | 2 ##### | 3.71 | 0.39 |
| KVNVEEVGGEALGRL    | 1328.6804 | 664.16 | 2 ##### | 3.72 | 0.36 |
| KVNVEEVGGEALGRL    | 1328.6804 | 664.17 | 2 ##### | 3.73 | 0.34 |
| KVNVEEVGGEALGRL    | 1328.6804 | 664.14 | 2 ##### | 3.73 | 0.41 |
| KVNVEEVGGEALGRL    | 1328.6804 | 664.17 | 2 ##### | 3.73 | 0.34 |
| KVNVEEVGGEALGRL    | 1328.6804 | 664.15 | 2 ##### | 3.74 | 0.39 |
| KVNVEEVGGEALGRL    | 1328.6804 | 664.16 | 2 ##### | 3.79 | 0.37 |
| KVNVEEVGGEALGRL    | 1328.6804 | 664.14 | 2 ##### | 3.79 | 0.39 |
| KVNVEEVGGEALGRL    | 1328.6804 | 664.13 | 2 ##### | 3.80 | 0.42 |
| KVNVEEVGGEALGRL    | 1328.6804 | 664.20 | 2 ##### | 3.82 | 0.29 |
| KVNVEEVGGEALGRL    | 1328.6804 | 664.19 | 2 ##### | 3.83 | 0.29 |
| KVNVEEVGGEALGRL    | 1328.6804 | 664.14 | 2 ##### | 3.84 | 0.41 |
| KVNVEEVGGEALGRL    | 1328.6804 | 664.14 | 2 ##### | 3.84 | 0.41 |
| KVNVEEVGGEALGRL    | 1328.6804 | 664.14 | 2 ##### | 3.88 | 0.41 |
| KVNVEEVGGEALGRL    | 1328.6804 | 664.10 | 2 ##### | 3.90 | 0.48 |
| KVNVEEVGGEALGRL    | 1328.6804 | 664.15 | 2 ##### | 3.93 | 0.39 |
| KVNVEEVGGEALGRL    | 1328.6804 | 664.15 | 2 ##### | 4.00 | 0.39 |

|                    |           |        |         |      |      |
|--------------------|-----------|--------|---------|------|------|
| KVNVEEVGGEALGRL    | 1328.6804 | 664.12 | 2 ##### | 4.01 | 0.44 |
| KVNVEEVGGEALGRL    | 1328.6804 | 664.14 | 2 ##### | 4.01 | 0.39 |
| KVNVEEVGGEALGRL    | 1328.6804 | 664.12 | 2 ##### | 4.06 | 0.44 |
| KVNVEEVGGEALGRL    | 1328.6804 | 664.10 | 2 ##### | 4.08 | 0.47 |
| KVNVEEVGGEALGRL    | 1328.6804 | 664.13 | 2 ##### | 4.09 | 0.42 |
| KVNVEEVGGEALGRL    | 1328.6804 | 664.11 | 2 ##### | 4.11 | 0.47 |
| KVNVEEVGGEALGRL    | 1328.6804 | 664.14 | 2 ##### | 4.14 | 0.41 |
| KVNVEEVGGEALGRL    | 1328.6804 | 664.14 | 2 ##### | 4.17 | 0.41 |
| KVNVEEVGGEALGRL    | 1328.6804 | 664.10 | 2 ##### | 4.17 | 0.48 |
| KVNVEEVGGEALGRL    | 1328.6804 | 664.11 | 2 ##### | 4.22 | 0.45 |
| KVNVEEVGGEALGRL    | 1328.6804 | 664.11 | 2 ##### | 4.26 | 0.46 |
| KVNVEEVGGEALGRL    | 1328.6804 | 664.11 | 2 ##### | 4.27 | 0.46 |
| KVNVEEVGGEALGRL    | 1328.6804 | 664.13 | 2 ##### | 4.42 | 0.42 |
| KVNVEEVGGEALGRL    | 1328.6804 | 664.12 | 2 ##### | 4.47 | 0.44 |
| KVNVEEVGGEALGRL    | 1328.6804 | 664.10 | 2 ##### | 4.49 | 0.47 |
| KVNVEEVGGEALGRL    | 1328.6804 | 664.09 | 2 ##### | 4.53 | 0.49 |
| KVNVEEVGGEALGRL    | 1328.6804 | 664.10 | 2 ##### | 4.63 | 0.48 |
| KVNVEEVGGEALGRL    | 1328.6804 | 664.08 | 2 ##### | 4.81 | 0.51 |
| KVPAINVND SVTKS    | 1256.6844 | 628.11 | 2 ##### | 3.08 | 0.47 |
| KVPAINVND SVTKS    | 1256.6844 | 628.14 | 2 ##### | 3.34 | 0.41 |
| KVPAINVND SVTKS    | 1256.6844 | 628.08 | 2 ##### | 3.55 | 0.53 |
| KVSELKEELKK        | 1074.6041 | 537.23 | 2 ##### | 2.82 | 0.14 |
| KVVTDTDETELARQ     | 1348.6591 | 674.04 | 2 ##### | 3.24 | 0.57 |
| KYHTINGHNAEVRK     | 1410.6873 | 705.14 | 2 ##### | 2.90 | 0.41 |
| KYQAVTATLEEK R     | 1252.6420 | 626.14 | 2 ##### | 2.62 | 0.36 |
| KYQAVTATLEEK R     | 1252.6420 | 626.11 | 2 ##### | 2.62 | 0.43 |
| KYSQVLANGLDNKL     | 1321.6747 | 660.63 | 2 ##### | 3.36 | 0.42 |
| KYVWNGELLDIIKN     | 1462.7941 | 731.33 | 2 ##### | 2.63 | 0.14 |
| KYVWNGELLDIIKN     | 1462.7941 | 731.32 | 2 ##### | 2.70 | 0.16 |
| KYVWNGELLDIIKN     | 1462.7941 | 731.31 | 2 ##### | 2.76 | 0.17 |
| KYVWNGELLDIIKN     | 1462.7941 | 731.32 | 2 ##### | 2.82 | 0.15 |
| KYVWNGELLDIIKN     | 1462.7941 | 731.31 | 2 ##### | 2.90 | 0.17 |
| KYVWNGELLDIIKN     | 1462.7941 | 731.31 | 2 ##### | 3.02 | 0.18 |
| KYVWNGELLDIIKN     | 1462.7941 | 731.32 | 2 ##### | 3.32 | 0.16 |
| PHYPALTPEQKK       | 1377.7162 | 688.64 | 2 ##### | 2.57 | 0.43 |
| PHYPALTPEQKK       | 1377.7162 | 688.63 | 2 ##### | 2.59 | 0.46 |
| PHYPALTPEQKK       | 1377.7162 | 688.62 | 2 ##### | 2.60 | 0.47 |
| RAAVPSGASTGIYEALRD | 1804.9440 | 902.19 | 2 ##### | 3.64 | 0.57 |
| RAAVPSGASTGIYEALRD | 1804.9440 | 601.52 | 3 ##### | 4.00 | 0.38 |
| RAAVPSGASTGIYEALRD | 1804.9440 | 601.53 | 3 ##### | 4.12 | 0.35 |
| RAAVPSGASTGIYEALRD | 1804.9440 | 902.17 | 2 ##### | 4.13 | 0.61 |
| RAAVPSGASTGIYEALRD | 1804.9440 | 902.23 | 2 ##### | 4.27 | 0.47 |
| RAAVPSGASTGIYEALRD | 1804.9440 | 902.20 | 2 ##### | 4.41 | 0.55 |
| RAAVPSGASTGIYEALRD | 1804.9440 | 902.19 | 2 ##### | 4.56 | 0.57 |
| RAAVPSGASTGIYEALRD | 1804.9440 | 902.19 | 2 ##### | 4.59 | 0.56 |
| RAAVPSGASTGIYEALRD | 1804.9440 | 902.20 | 2 ##### | 4.67 | 0.54 |
| RAAVPSGASTGIYEALRD | 1804.9440 | 902.19 | 2 ##### | 4.74 | 0.57 |
| RAAVPSGASTGIYEALRD | 1804.9440 | 902.17 | 2 ##### | 4.86 | 0.60 |
| RAFITNIPFDVKW      | 1264.6936 | 632.17 | 2 ##### | 3.17 | 0.35 |
| RAFITNIPFDVKW      | 1264.6936 | 632.11 | 2 ##### | 3.33 | 0.47 |
| RAFITNIPFDVKW      | 1264.6936 | 632.15 | 2 ##### | 3.41 | 0.39 |
| RAFITNIPFDVKW      | 1264.6936 | 632.12 | 2 ##### | 3.58 | 0.45 |
| RAFITNIPFDVKW      | 1264.6936 | 632.10 | 2 ##### | 3.66 | 0.49 |
| RAFITNIPFDVKW      | 1264.6936 | 632.11 | 2 ##### | 3.67 | 0.47 |
| RAGELTEDEVERV      | 1247.5750 | 623.62 | 2 ##### | 2.68 | 0.34 |
| RAGELTEDEVERV      | 1247.5750 | 623.56 | 2 ##### | 2.79 | 0.46 |

|                    |           |        |         |      |      |
|--------------------|-----------|--------|---------|------|------|
| RAGTGVDNVDLEAATRK  | 1488.7289 | 744.06 | 2 ##### | 3.86 | 0.62 |
| RAIVAIENPADSVISSRN | 1740.9491 | 870.26 | 2 ##### | 3.62 | 0.43 |
| RAIVAIENPADSVISSRN | 1740.9491 | 870.22 | 2 ##### | 4.16 | 0.51 |
| RAIVAIENPADSVISSRN | 1740.9491 | 870.19 | 2 ##### | 5.28 | 0.56 |
| RAKFEELNMDLFRS     | 1528.7509 | 509.46 | 3 ##### | 3.62 | 0.38 |
| RALEESNYELEGKI     | 1381.6482 | 690.73 | 2 ##### | 2.94 | 0.20 |
| RALEESNYELEGKI     | 1381.6482 | 690.63 | 2 ##### | 3.17 | 0.39 |
| RALTQTGGPHVKA      | 1108.6110 | 554.11 | 2 ##### | 2.76 | 0.38 |
| RALTVPELTQQVFDKN   | 1659.8953 | 829.66 | 2 ##### | 2.91 | 0.58 |
| RALTVPELTQQVFDKN   | 1659.8953 | 829.64 | 2 ##### | 2.96 | 0.62 |
| RALTVPELTQQVFDKN   | 1659.8953 | 829.68 | 2 ##### | 3.18 | 0.54 |
| RALTVPELTQQVFDKN   | 1659.8953 | 829.65 | 2 ##### | 3.25 | 0.60 |
| RALTVPELTQQVFDKN   | 1659.8953 | 553.14 | 3 ##### | 3.40 | 0.46 |
| RALTVPELTQQVFDKN   | 1659.8953 | 829.67 | 2 ##### | 3.45 | 0.55 |
| RALTVPELTQQVFDKN   | 1659.8953 | 829.62 | 2 ##### | 3.54 | 0.66 |
| RALTVPELTQQVFDKN   | 1659.8953 | 829.69 | 2 ##### | 3.79 | 0.51 |
| RALTVPELTQQVFDKN   | 1659.8953 | 829.66 | 2 ##### | 3.82 | 0.58 |
| RALTVPELTQQVFDKN   | 1659.8953 | 829.67 | 2 ##### | 3.84 | 0.55 |
| RALTVPELTQQVFDKN   | 1659.8953 | 829.64 | 2 ##### | 4.05 | 0.61 |
| RALTVPELTQQVFDKN   | 1659.8953 | 829.67 | 2 ##### | 4.24 | 0.57 |
| RARFEELNADLFRG     | 1480.7543 | 740.14 | 2 ##### | 2.94 | 0.48 |
| RARFEELNADLFRG     | 1480.7543 | 740.15 | 2 ##### | 3.08 | 0.45 |
| RARFEELNADLFRG     | 1480.7543 | 740.15 | 2 ##### | 3.28 | 0.46 |
| RARFEELNADLFRG     | 1480.7543 | 740.16 | 2 ##### | 3.47 | 0.43 |
| RARFEELNADLFRG     | 1480.7543 | 740.14 | 2 ##### | 3.50 | 0.48 |
| RAVAVVVDPIQSVKG    | 1324.7834 | 662.20 | 2 ##### | 2.54 | 0.39 |
| RAVFPSIVGRPRH      | 1198.7054 | 599.18 | 2 ##### | 2.73 | 0.35 |
| RAVFPSIVGRPRH      | 1198.7054 | 599.12 | 2 ##### | 2.79 | 0.47 |
| RAVFDLEPTVIDVRT    | 1701.9058 | 850.73 | 2 ##### | 3.62 | 0.45 |
| RAVFDLEPTVIDVRT    | 1701.9058 | 850.67 | 2 ##### | 4.40 | 0.57 |
| RAVFDLEPTVIDVRT    | 1701.9058 | 850.69 | 2 ##### | 5.08 | 0.52 |
| RAVFDLEPTVIDVRT    | 1701.9058 | 850.70 | 2 ##### | 5.12 | 0.50 |
| RAVFDLEPTVIDVRT    | 1701.9058 | 850.69 | 2 ##### | 5.14 | 0.52 |
| RCWEVIDAQAEMALRS   | 1634.7665 | 817.32 | 2 ##### | 2.60 | 0.13 |
| RCWEVIDAQAEMALRS   | 1634.7665 | 817.30 | 2 ##### | 2.91 | 0.17 |
| RDADDAVYELNSKE     | 1339.6012 | 669.57 | 2 ##### | 3.58 | 0.47 |
| RDAVTYTEHAKR       | 1134.5426 | 567.09 | 2 ##### | 2.63 | 0.36 |
| RDAVTYTEHAKR       | 1134.5426 | 567.06 | 2 ##### | 2.77 | 0.43 |
| RDAVTYTEHAKR       | 1134.5426 | 567.02 | 2 ##### | 2.89 | 0.50 |
| RDAVTYTEHAKR       | 1134.5426 | 567.03 | 2 ##### | 3.03 | 0.47 |
| RDAVTYTEHAKR       | 1134.5426 | 567.02 | 2 ##### | 3.08 | 0.49 |
| RDAVTYTEHAKR       | 1134.5426 | 567.06 | 2 ##### | 3.17 | 0.42 |
| RDAVTYTEHAKR       | 1134.5426 | 567.04 | 2 ##### | 3.21 | 0.47 |
| RDGEEAGAYDGPRT     | 1236.5127 | 617.97 | 2 ##### | 2.77 | 0.56 |
| RDGEEAGAYDGPRT     | 1236.5127 | 618.01 | 2 ##### | 3.29 | 0.50 |
| RDGEEAGAYDGPRT     | 1236.5127 | 617.98 | 2 ##### | 3.59 | 0.55 |
| RDGEEAGAYDGPRT     | 1236.5127 | 617.95 | 2 ##### | 3.63 | 0.60 |
| RDIQENDEEAVQVKE    | 1516.7125 | 758.17 | 2 ##### | 3.32 | 0.37 |
| RDIQENDEEAVQVKE    | 1516.7125 | 758.21 | 2 ##### | 3.54 | 0.29 |
| RDKLNNLVLFDKA      | 1318.7366 | 659.20 | 2 ##### | 3.16 | 0.34 |
| RDKLNNLVLFDKA      | 1318.7366 | 659.18 | 2 ##### | 3.26 | 0.38 |
| RDKLNNLVLFDKA      | 1318.7366 | 659.17 | 2 ##### | 3.46 | 0.40 |
| RDLFSDGHSEFLKA     | 1394.6587 | 697.10 | 2 ##### | 2.83 | 0.47 |
| RDLFSDGHSEFLKA     | 1394.6587 | 697.10 | 2 ##### | 3.00 | 0.46 |
| RDLFSDGHSEFLKA     | 1394.6587 | 697.11 | 2 ##### | 3.09 | 0.43 |
| RDLFSDGHSEFLKA     | 1394.6587 | 697.09 | 2 ##### | 3.20 | 0.47 |



|                    |           |        |         |      |      |
|--------------------|-----------|--------|---------|------|------|
| RDLFSDGHSEFLKA     | 1394.6587 | 697.10 | 2 ##### | 3.48 | 0.45 |
| RDNIQGITKPAIRR     | 1325.7535 | 662.68 | 2 ##### | 2.50 | 0.39 |
| RDNIQGITKPAIRR     | 1325.7535 | 662.71 | 2 ##### | 2.52 | 0.34 |
| RDNIQGITKPAIRR     | 1325.7535 | 662.72 | 2 ##### | 2.53 | 0.32 |
| RDNIQGITKPAIRR     | 1325.7535 | 662.74 | 2 ##### | 2.54 | 0.27 |
| RDNIQGITKPAIRR     | 1325.7535 | 662.74 | 2 ##### | 2.55 | 0.27 |
| RDNIQGITKPAIRR     | 1325.7535 | 662.66 | 2 ##### | 2.57 | 0.44 |
| RDNIQGITKPAIRR     | 1325.7535 | 662.69 | 2 ##### | 2.60 | 0.38 |
| RDNIQGITKPAIRR     | 1325.7535 | 662.70 | 2 ##### | 2.60 | 0.35 |
| RDNIQGITKPAIRR     | 1325.7535 | 662.73 | 2 ##### | 2.60 | 0.29 |
| RDNIQGITKPAIRR     | 1325.7535 | 662.73 | 2 ##### | 2.62 | 0.30 |
| RDNIQGITKPAIRR     | 1325.7535 | 662.68 | 2 ##### | 2.63 | 0.39 |
| RDNIQGITKPAIRR     | 1325.7535 | 662.70 | 2 ##### | 2.67 | 0.36 |
| RDNIQGITKPAIRR     | 1325.7535 | 662.71 | 2 ##### | 2.71 | 0.34 |
| RDNIQGITKPAIRR     | 1325.7535 | 662.67 | 2 ##### | 2.71 | 0.41 |
| RDNIQGITKPAIRR     | 1325.7535 | 662.71 | 2 ##### | 2.79 | 0.33 |
| RDNIQGITKPAIRR     | 1325.7535 | 662.74 | 2 ##### | 2.82 | 0.28 |
| RDNIQGITKPAIRR     | 1325.7535 | 662.75 | 2 ##### | 2.87 | 0.26 |
| RDNIQGITKPAIRR     | 1325.7535 | 662.70 | 2 ##### | 2.87 | 0.36 |
| RDNIQGITKPAIRR     | 1325.7535 | 662.70 | 2 ##### | 2.92 | 0.35 |
| RDNIQGITKPAIRR     | 1325.7535 | 662.70 | 2 ##### | 2.93 | 0.35 |
| RDNIQGITKPAIRR     | 1325.7535 | 662.73 | 2 ##### | 2.97 | 0.28 |
| RDNIQGITKPAIRR     | 1325.7535 | 662.70 | 2 ##### | 2.99 | 0.36 |
| RDNIQGITKPAIRR     | 1325.7535 | 662.71 | 2 ##### | 3.05 | 0.34 |
| RDNIQGITKPAIRR     | 1325.7535 | 662.77 | 2 ##### | 3.06 | 0.22 |
| RDNIQGITKPAIRR     | 1325.7535 | 662.73 | 2 ##### | 3.07 | 0.30 |
| RDNIQGITKPAIRR     | 1325.7535 | 662.66 | 2 ##### | 3.22 | 0.43 |
| RDNIQGITKPAIRR     | 1325.7535 | 662.67 | 2 ##### | 3.23 | 0.41 |
| RDNIQGITKPAIRR     | 1325.7535 | 662.68 | 2 ##### | 3.25 | 0.40 |
| RDNIQGITKPAIRR     | 1325.7535 | 662.69 | 2 ##### | 3.27 | 0.38 |
| RDNIQGITKPAIRR     | 1325.7535 | 662.71 | 2 ##### | 3.30 | 0.33 |
| RDNIQGITKPAIRR     | 1325.7535 | 662.66 | 2 ##### | 3.32 | 0.44 |
| RDNIQGITKPAIRR     | 1325.7535 | 662.68 | 2 ##### | 3.43 | 0.40 |
| RDNIQGITKPAIRR     | 1325.7535 | 662.69 | 2 ##### | 3.43 | 0.37 |
| RDNIQGITKPAIRR     | 1325.7535 | 662.66 | 2 ##### | 3.44 | 0.44 |
| RDQTPDENQVIVKI     | 1500.7177 | 750.23 | 2 ##### | 3.47 | 0.25 |
| RDQTPDENEEVIVRI    | 1543.7235 | 771.62 | 2 ##### | 3.49 | 0.48 |
| RDQTPDENEEVIVRI    | 1543.7235 | 771.61 | 2 ##### | 3.59 | 0.51 |
| RDVDEVSSLLRT       | 1132.5845 | 566.19 | 2 ##### | 2.80 | 0.21 |
| RDVDEVSSLLRT       | 1132.5845 | 566.13 | 2 ##### | 2.92 | 0.32 |
| RDVDEVSSLLRT       | 1132.5845 | 566.16 | 2 ##### | 3.32 | 0.26 |
| REAGAGGLAIAVEGPSKA | 1426.7537 | 713.20 | 2 ##### | 2.74 | 0.36 |
| REEAESTLQSFRQ      | 1296.6067 | 648.09 | 2 ##### | 2.59 | 0.43 |
| REEAESTLQSFRQ      | 1296.6067 | 648.09 | 2 ##### | 2.74 | 0.43 |
| REGDVLTLLESERE     | 1360.6954 | 680.17 | 2 ##### | 3.11 | 0.35 |
| REGDVLTLLESERE     | 1360.6954 | 680.15 | 2 ##### | 3.13 | 0.39 |
| REGDVLTLLESERE     | 1360.6954 | 680.08 | 2 ##### | 3.38 | 0.54 |
| REGDVLTLLESERE     | 1360.6954 | 680.18 | 2 ##### | 3.48 | 0.34 |
| REGDVLTLLESERE     | 1360.6954 | 680.17 | 2 ##### | 3.48 | 0.36 |
| RELAEDGYSGVEVRV    | 1423.6699 | 711.55 | 2 ##### | 3.89 | 0.56 |
| RELAEDGYSGVEVRV    | 1423.6699 | 711.56 | 2 ##### | 4.11 | 0.55 |
| RELAEDGYSGVEVRV    | 1423.6699 | 711.57 | 2 ##### | 4.19 | 0.52 |
| RELISNASDALDKI     | 1275.6427 | 637.61 | 2 ##### | 2.95 | 0.42 |
| RELISNASDALDKI     | 1275.6427 | 637.74 | 2 ##### | 3.20 | 0.16 |
| RELISNASDALDKI     | 1275.6427 | 637.55 | 2 ##### | 3.35 | 0.55 |
| RELISNASDALDKI     | 1275.6427 | 637.57 | 2 ##### | 3.36 | 0.51 |

|                  |           |        |         |      |      |
|------------------|-----------|--------|---------|------|------|
| RELISNASDALDKI   | 1275.6427 | 637.54 | 2 ##### | 3.42 | 0.56 |
| RELISNASDALDKI   | 1275.6427 | 637.51 | 2 ##### | 3.46 | 0.62 |
| RELISNASDALDKI   | 1275.6427 | 637.63 | 2 ##### | 3.48 | 0.39 |
| RELISNASDALDKI   | 1275.6427 | 637.60 | 2 ##### | 3.49 | 0.45 |
| RELISNASDALDKI   | 1275.6427 | 637.58 | 2 ##### | 3.52 | 0.48 |
| RELISNASDALDKI   | 1275.6427 | 637.55 | 2 ##### | 3.59 | 0.55 |
| RELISNASDALDKI   | 1275.6427 | 637.60 | 2 ##### | 3.73 | 0.44 |
| RELISNASDALDKI   | 1275.6427 | 637.55 | 2 ##### | 3.79 | 0.54 |
| RELISNASDALDKI   | 1275.6427 | 637.58 | 2 ##### | 3.94 | 0.47 |
| RELISNSSDALDKI   | 1291.6376 | 645.75 | 2 ##### | 2.59 | 0.14 |
| RELISNSSDALDKI   | 1291.6376 | 645.62 | 2 ##### | 2.82 | 0.40 |
| RELISNSSDALDKI   | 1291.6376 | 645.61 | 2 ##### | 3.16 | 0.42 |
| RELISNSSDALDKI   | 1291.6376 | 645.65 | 2 ##### | 3.21 | 0.33 |
| RELISNSSDALDKI   | 1291.6376 | 645.60 | 2 ##### | 3.26 | 0.43 |
| RELNDFISYLQRE    | 1397.7059 | 698.63 | 2 ##### | 2.64 | 0.44 |
| RELNDFISYLQRE    | 1397.7059 | 698.59 | 2 ##### | 3.07 | 0.53 |
| RELNDFISYLQRE    | 1397.7059 | 698.63 | 2 ##### | 3.89 | 0.45 |
| RETLLNSATTSLSNV  | 1478.7697 | 739.17 | 2 ##### | 3.32 | 0.43 |
| RFEELNADLFRG     | 1253.6161 | 626.59 | 2 ##### | 2.63 | 0.43 |
| RFEELNADLFRG     | 1253.6161 | 626.58 | 2 ##### | 2.76 | 0.45 |
| RFEELNADLFRG     | 1253.6161 | 626.58 | 2 ##### | 3.05 | 0.46 |
| RFEELNADLFRG     | 1253.6161 | 626.61 | 2 ##### | 3.17 | 0.40 |
| RFGQGGAGPVGQGP   | 1341.6658 | 670.72 | 2 ##### | 2.56 | 0.22 |
| RFGQGGAGPVGQGP   | 1341.6658 | 670.62 | 2 ##### | 2.81 | 0.43 |
| RFGQGGAGPVGQGP   | 1341.6658 | 670.58 | 2 ##### | 3.56 | 0.51 |
| RFHVEEKGKGD      | 1159.5742 | 579.57 | 2 ##### | 2.74 | 0.44 |
| RFHVEEKGKGD      | 1159.5742 | 579.60 | 2 ##### | 2.79 | 0.38 |
| RFHVEEKGKGD      | 1159.5742 | 579.60 | 2 ##### | 3.01 | 0.37 |
| RFPGQLNADLRK     | 1130.5953 | 565.11 | 2 ##### | 2.53 | 0.37 |
| RFPGQLNADLRK     | 1130.5953 | 565.11 | 2 ##### | 3.17 | 0.38 |
| RFTQAGSEVSALLGRI | 1435.7540 | 717.67 | 2 ##### | 3.39 | 0.42 |
| RFTQAGSEVSALLGRI | 1435.7540 | 717.64 | 2 ##### | 3.95 | 0.47 |
| RFTQAGSEVSALLGRI | 1435.7540 | 717.69 | 2 ##### | 4.13 | 0.37 |
| RFTQAGSEVSALLGRI | 1435.7540 | 717.67 | 2 ##### | 4.17 | 0.42 |
| RFTQAGSEVSALLGRI | 1435.7540 | 717.69 | 2 ##### | 4.42 | 0.38 |
| RFTQAGSEVSALLGRI | 1435.7540 | 717.60 | 2 ##### | 4.57 | 0.55 |
| RGAAQNIIPASTGA   | 1369.7434 | 684.73 | 2 ##### | 2.57 | 0.29 |
| RGAAQNIIPASTGA   | 1369.7434 | 684.71 | 2 ##### | 2.68 | 0.33 |
| RGAAQNIIPASTGA   | 1369.7434 | 684.72 | 2 ##### | 2.79 | 0.30 |
| RGAAQNIIPASTGA   | 1369.7434 | 684.73 | 2 ##### | 2.81 | 0.27 |
| RGAAQNIIPASTGA   | 1369.7434 | 684.67 | 2 ##### | 3.06 | 0.40 |
| RGAAQNIIPASTGA   | 1369.7434 | 684.69 | 2 ##### | 3.08 | 0.36 |
| RGAAQNIIPASTGA   | 1369.7434 | 684.73 | 2 ##### | 3.10 | 0.28 |
| RGAAQNIIPASTGA   | 1369.7434 | 684.67 | 2 ##### | 3.20 | 0.41 |
| RGAAQNIIPASTGA   | 1369.7434 | 684.71 | 2 ##### | 3.34 | 0.33 |
| RGAAQNIIPASTGA   | 1369.7434 | 684.65 | 2 ##### | 3.39 | 0.44 |
| RGAAQNIIPASTGA   | 1369.7434 | 684.63 | 2 ##### | 3.63 | 0.48 |
| RGAAQNIIPASTGA   | 1369.7434 | 684.65 | 2 ##### | 3.72 | 0.44 |
| RGAAQNIIPASTGA   | 1369.7434 | 684.63 | 2 ##### | 3.83 | 0.48 |
| RGAAQNIIPASTGA   | 1369.7434 | 684.70 | 2 ##### | 3.94 | 0.34 |
| RGAAQNIIPASTGA   | 1369.7434 | 684.64 | 2 ##### | 3.98 | 0.47 |
| RGAGTGGLGLAVE    | 1570.8071 | 785.10 | 2 ##### | 3.38 | 0.60 |
| RGAGTGGLGLAVE    | 1570.8071 | 785.13 | 2 ##### | 3.84 | 0.56 |
| RGATQQILDEAERS   | 1330.6598 | 665.17 | 2 ##### | 3.43 | 0.32 |
| RGATQQILDEAERS   | 1330.6598 | 665.10 | 2 ##### | 3.65 | 0.45 |
| RGATQQILDEAERS   | 1330.6598 | 665.19 | 2 ##### | 3.77 | 0.29 |

|                           |           |        |         |      |      |
|---------------------------|-----------|--------|---------|------|------|
| RGATQQILDEAERS            | 1330.6598 | 665.17 | 2 ##### | 3.82 | 0.33 |
| RGDLGIEIPAENV             | 1141.6100 | 570.58 | 2 ##### | 3.13 | 0.44 |
| RGDVTAEAAAGASPAK          | 1373.6543 | 686.61 | 2 ##### | 2.84 | 0.44 |
| RGDVTAEAAAGASPAK          | 1373.6543 | 686.62 | 2 ##### | 3.27 | 0.42 |
| RGDVTAEAAAGASPAK          | 1373.6543 | 686.60 | 2 ##### | 3.32 | 0.46 |
| RGGGGNFGPGPGSNFRG         | 1377.6294 | 688.65 | 2 ##### | 2.72 | 0.33 |
| RGGGGNFGPGPGSNFRG         | 1377.6294 | 688.62 | 2 ##### | 2.74 | 0.39 |
| RGGGGNFGPGPGSNFRG         | 1377.6294 | 688.62 | 2 ##### | 2.91 | 0.39 |
| RGGGGNFGPGPGSNFRG         | 1377.6294 | 688.62 | 2 ##### | 2.97 | 0.39 |
| RGGGGNFGPGPGSNFRG         | 1377.6294 | 688.62 | 2 ##### | 3.01 | 0.38 |
| RGGNIGDGGGAADRV           | 1116.5028 | 558.04 | 2 ##### | 2.64 | 0.42 |
| RGGNIGDGGGAADRV           | 1116.5028 | 558.06 | 2 ##### | 2.74 | 0.38 |
| RGGNIGDGGGAADRV           | 1116.5028 | 558.05 | 2 ##### | 3.04 | 0.41 |
| RGGNIGDGGGAADRV           | 1116.5028 | 558.05 | 2 ##### | 3.23 | 0.41 |
| RGKLDGNQDLIRF             | 1228.6644 | 614.10 | 2 ##### | 2.61 | 0.47 |
| RGKLDGNQDLIRF             | 1228.6644 | 614.12 | 2 ##### | 2.73 | 0.42 |
| RGLMGNIIELYEVAGIKG        | 1833.0190 | 916.44 | 2 ##### | 2.85 | 0.14 |
| RGNFGGSFAGSFGGAGGHAPGVARK | 2034.9529 | 678.15 | 3 ##### | 3.84 | 0.52 |
| RGNPTVEVDLYTAKG           | 1406.7162 | 703.11 | 2 ##### | 2.90 | 0.49 |
| RGNPTVEVDLYTAKG           | 1406.7162 | 703.10 | 2 ##### | 2.99 | 0.51 |
| RGNPTVEVDLYTAKG           | 1406.7162 | 703.11 | 2 ##### | 3.00 | 0.50 |
| RGNPTVEVDLYTAKG           | 1406.7162 | 703.09 | 2 ##### | 3.36 | 0.54 |
| RGNPTVEVDLYTAKG           | 1406.7162 | 703.07 | 2 ##### | 3.38 | 0.58 |
| RGNPTVEVDLYTAKG           | 1406.7162 | 703.11 | 2 ##### | 3.42 | 0.49 |
| RGNPTVEVDLYTAKG           | 1406.7162 | 703.09 | 2 ##### | 3.52 | 0.53 |
| RGNPTVEVDLYTAKG           | 1406.7162 | 703.07 | 2 ##### | 3.60 | 0.58 |
| RGNPTVEVDLYTAKG           | 1406.7162 | 703.09 | 2 ##### | 3.82 | 0.54 |
| RGSYGDLDGGPIITTQVTIPKD    | 1917.0327 | 958.24 | 2 ##### | 4.70 | 0.56 |
| RGYISPYFINTSKG            | 1389.7048 | 694.67 | 2 ##### | 2.88 | 0.37 |
| RGYSFTTTAERE              | 1132.5270 | 566.11 | 2 ##### | 2.54 | 0.31 |
| RGYSFTTTAERE              | 1132.5270 | 566.10 | 2 ##### | 2.55 | 0.33 |
| RGYSFTTTAERE              | 1132.5270 | 566.12 | 2 ##### | 2.56 | 0.29 |
| RGYSFTTTAERE              | 1132.5270 | 566.13 | 2 ##### | 2.56 | 0.27 |
| RGYSFTTTAERE              | 1132.5270 | 566.09 | 2 ##### | 2.57 | 0.34 |
| RGYSFTTTAERE              | 1132.5270 | 566.10 | 2 ##### | 2.57 | 0.34 |
| RGYSFTTTAERE              | 1132.5270 | 566.08 | 2 ##### | 2.60 | 0.37 |
| RGYSFTTTAERE              | 1132.5270 | 566.18 | 2 ##### | 2.60 | 0.16 |
| RGYSFTTTAERE              | 1132.5270 | 565.96 | 2 ##### | 2.62 | 0.60 |
| RGYSFTTTAERE              | 1132.5270 | 566.04 | 2 ##### | 2.65 | 0.45 |
| RGYSFTTTAERE              | 1132.5270 | 566.10 | 2 ##### | 2.68 | 0.33 |
| RGYSFTTTAERE              | 1132.5270 | 565.97 | 2 ##### | 2.68 | 0.60 |
| RGYSFTTTAERE              | 1132.5270 | 565.93 | 2 ##### | 2.69 | 0.66 |
| RGYSFTTTAERE              | 1132.5270 | 566.00 | 2 ##### | 2.71 | 0.53 |
| RGYSFTTTAERE              | 1132.5270 | 566.07 | 2 ##### | 2.81 | 0.39 |
| RGYSFTTTAERE              | 1132.5270 | 565.98 | 2 ##### | 2.90 | 0.57 |
| RGYSFTTTAERE              | 1132.5270 | 566.04 | 2 ##### | 2.97 | 0.44 |
| RGYSFTTTAERE              | 1132.5270 | 566.03 | 2 ##### | 2.98 | 0.47 |
| RGYSFTTTAERE              | 1132.5270 | 566.00 | 2 ##### | 3.01 | 0.54 |
| RGYSFTTTAERE              | 1132.5270 | 565.94 | 2 ##### | 3.16 | 0.65 |
| RGYSFTTTAERE              | 1132.5270 | 565.93 | 2 ##### | 3.17 | 0.67 |
| RGYSFTTTAERE              | 1132.5270 | 565.94 | 2 ##### | 3.25 | 0.66 |
| RHGLGFLPRK                | 983.5421  | 491.57 | 2 ##### | 2.68 | 0.41 |
| RHVFGESDELIGQKV           | 1458.7223 | 729.05 | 2 ##### | 3.70 | 0.61 |
| RHVFGESDELIGQKV           | 1458.7223 | 729.06 | 2 ##### | 3.72 | 0.61 |
| RHVFGESDELIGQKV           | 1458.7223 | 729.05 | 2 ##### | 3.74 | 0.63 |
| RHVFGESDELIGQKV           | 1458.7223 | 729.04 | 2 ##### | 3.92 | 0.64 |

|                           |           |        |         |      |      |
|---------------------------|-----------|--------|---------|------|------|
| RHVFGESDELIGQKV           | 1458.7223 | 729.04 | 2 ##### | 4.07 | 0.63 |
| RHVFGGDDFKS               | 1120.5422 | 560.03 | 2 ##### | 2.50 | 0.47 |
| RHVFGGDDFKS               | 1120.5422 | 560.02 | 2 ##### | 2.55 | 0.50 |
| RIADGYEQAARI              | 1093.5272 | 546.56 | 2 ##### | 2.51 | 0.41 |
| RIEDVTPIPSDSTRR           | 1429.7169 | 714.63 | 2 ##### | 3.60 | 0.46 |
| RIESLSSQLSNLQKE           | 1446.7799 | 723.19 | 2 ##### | 4.09 | 0.40 |
| RIESLSSQLSNLQKE           | 1446.7799 | 723.20 | 2 ##### | 4.14 | 0.38 |
| RIESLSSQLSNLQKE           | 1446.7799 | 723.19 | 2 ##### | 4.33 | 0.40 |
| RIHFPLATYAPVISA EKA       | 1756.9633 | 585.51 | 3 ##### | 3.08 | 0.43 |
| RIHFPLATYAPVISA EKA       | 1756.9633 | 585.56 | 3 ##### | 3.19 | 0.29 |
| RIHFPLATYAPVISA EKA       | 1756.9633 | 585.54 | 3 ##### | 3.29 | 0.35 |
| RIHFPLATYAPVISA EKA       | 1756.9633 | 585.49 | 3 ##### | 3.34 | 0.50 |
| RIIDVVYNASNNELVRT         | 1718.9072 | 859.23 | 2 ##### | 3.54 | 0.44 |
| RIITEGFEEAAKEKA           | 1335.7155 | 667.62 | 2 ##### | 3.04 | 0.48 |
| RIITEGFEEAAKEKA           | 1335.7155 | 667.68 | 2 ##### | 3.20 | 0.36 |
| RIITEGFEEAAKEKA           | 1335.7155 | 667.67 | 2 ##### | 3.22 | 0.37 |
| RIITITGTQDQIQNAQYLLQNSVKQ | 2589.3882 | 862.90 | 3 ##### | 4.87 | 0.69 |
| RIITLAGPTNAIFKA           | 1358.8042 | 679.20 | 2 ##### | 3.01 | 0.40 |
| RIITLAGPTNAIFKA           | 1358.8042 | 679.17 | 2 ##### | 3.15 | 0.45 |
| RIITLAGPTNAIFKA           | 1358.8042 | 679.19 | 2 ##### | 3.18 | 0.43 |
| RIITLAGPTNAIFKA           | 1358.8042 | 679.14 | 2 ##### | 3.25 | 0.52 |
| RIITLAGPTNAIFKA           | 1358.8042 | 679.16 | 2 ##### | 3.60 | 0.48 |
| RIITLAGPTNAIFKA           | 1358.8042 | 679.19 | 2 ##### | 3.61 | 0.43 |
| RIITLTGPTNAIFKA           | 1388.8148 | 694.16 | 2 ##### | 3.46 | 0.50 |
| RIITLTGPTNAIFKA           | 1388.8148 | 694.14 | 2 ##### | 3.49 | 0.54 |
| RIITLTGPTNAIFKA           | 1388.8148 | 694.13 | 2 ##### | 3.74 | 0.55 |
| RILGADTSVDLEETGRV         | 1575.7860 | 787.63 | 2 ##### | 3.52 | 0.53 |
| RILGADTSVDLEETGRV         | 1575.7860 | 787.63 | 2 ##### | 3.95 | 0.52 |
| RILGLLDTHLKT              | 1122.6881 | 561.27 | 2 ##### | 2.57 | 0.16 |
| RILGLLDTHLKT              | 1122.6881 | 561.27 | 2 ##### | 2.63 | 0.15 |
| RILGLLDTHLKT              | 1122.6881 | 561.27 | 2 ##### | 2.92 | 0.15 |
| RINVYYNEATGGKY            | 1328.6481 | 664.16 | 2 ##### | 3.54 | 0.33 |
| RINVYYNEATGGKY            | 1328.6481 | 664.08 | 2 ##### | 3.70 | 0.48 |
| RINVYYNEATGGKY            | 1328.6481 | 664.09 | 2 ##### | 3.73 | 0.47 |
| RIQLVEEELDRA              | 1243.6528 | 621.62 | 2 ##### | 2.58 | 0.41 |
| RIQLVEEELDRA              | 1243.6528 | 621.66 | 2 ##### | 2.70 | 0.34 |
| RIQTQPGYANTLRE            | 1361.7172 | 680.69 | 2 ##### | 2.50 | 0.33 |
| RIQTQPGYANTLRE            | 1361.7172 | 680.76 | 2 ##### | 2.82 | 0.20 |
| RISGLIYEETR G             | 1180.6208 | 590.15 | 2 ##### | 2.56 | 0.32 |
| RISGLIYEETR G             | 1180.6208 | 590.12 | 2 ##### | 2.63 | 0.39 |
| RISGLIYEETR G             | 1180.6208 | 590.08 | 2 ##### | 2.63 | 0.46 |
| RISGLIYEETR G             | 1180.6208 | 590.15 | 2 ##### | 2.64 | 0.32 |
| RISGLIYEETR G             | 1180.6208 | 590.18 | 2 ##### | 2.66 | 0.26 |
| RISGLIYEETR G             | 1180.6208 | 590.14 | 2 ##### | 2.66 | 0.33 |
| RISGLIYEETR G             | 1180.6208 | 590.13 | 2 ##### | 2.69 | 0.35 |
| RISGLIYEETR G             | 1180.6208 | 590.11 | 2 ##### | 2.73 | 0.41 |
| RISGLIYEETR G             | 1180.6208 | 590.17 | 2 ##### | 2.74 | 0.29 |
| RISGLIYEETR G             | 1180.6208 | 590.13 | 2 ##### | 2.75 | 0.36 |
| RISGLIYEETR G             | 1180.6208 | 590.15 | 2 ##### | 2.78 | 0.33 |
| RISGLIYEETR G             | 1180.6208 | 590.12 | 2 ##### | 2.80 | 0.39 |
| RISGLIYEETR G             | 1180.6208 | 590.14 | 2 ##### | 2.83 | 0.34 |
| RISGLIYEETR G             | 1180.6208 | 590.08 | 2 ##### | 2.85 | 0.45 |
| RISGLIYEETR G             | 1180.6208 | 590.16 | 2 ##### | 2.87 | 0.29 |
| RISGLIYEETR G             | 1180.6208 | 590.16 | 2 ##### | 2.92 | 0.30 |
| RISGLIYEETR G             | 1180.6208 | 590.12 | 2 ##### | 2.92 | 0.39 |
| RISGLIYEETR G             | 1180.6208 | 590.10 | 2 ##### | 2.94 | 0.41 |

|                  |           |        |         |      |      |
|------------------|-----------|--------|---------|------|------|
| RISGLIYEETR      | 1180.6208 | 590.14 | 2 ##### | 2.97 | 0.33 |
| RISGLIYEETR      | 1180.6208 | 590.15 | 2 ##### | 3.00 | 0.31 |
| RISGLIYEETR      | 1180.6208 | 590.12 | 2 ##### | 3.03 | 0.39 |
| RISGLIYEETR      | 1180.6208 | 590.10 | 2 ##### | 3.04 | 0.41 |
| RISGLIYEETR      | 1180.6208 | 590.09 | 2 ##### | 3.05 | 0.44 |
| RISGLIYEETR      | 1180.6208 | 590.08 | 2 ##### | 3.05 | 0.45 |
| RISGLIYEETR      | 1180.6208 | 590.12 | 2 ##### | 3.10 | 0.37 |
| RISGLIYEETR      | 1180.6208 | 590.10 | 2 ##### | 3.16 | 0.42 |
| RISGLIYEETR      | 1180.6208 | 590.09 | 2 ##### | 3.17 | 0.45 |
| RISGLIYEETR      | 1180.6208 | 590.12 | 2 ##### | 3.18 | 0.39 |
| RISGLIYEETR      | 1180.6208 | 590.12 | 2 ##### | 3.20 | 0.38 |
| RISGLIYEETR      | 1180.6208 | 590.09 | 2 ##### | 3.23 | 0.43 |
| RISGLIYEETR      | 1180.6208 | 590.13 | 2 ##### | 3.24 | 0.37 |
| RISGLIYEETR      | 1180.6208 | 590.11 | 2 ##### | 3.25 | 0.40 |
| RISGLIYEETR      | 1180.6208 | 590.08 | 2 ##### | 3.27 | 0.46 |
| RISGLIYEETR      | 1180.6208 | 590.00 | 2 ##### | 3.31 | 0.62 |
| RISGLIYEETR      | 1180.6208 | 590.09 | 2 ##### | 3.35 | 0.43 |
| RISGLIYEETR      | 1180.6208 | 590.08 | 2 ##### | 3.43 | 0.47 |
| RISGLIYEETR      | 1180.6208 | 590.09 | 2 ##### | 3.44 | 0.45 |
| RISGLIYEETR      | 1180.6208 | 590.07 | 2 ##### | 3.45 | 0.47 |
| RISGLIYEETR      | 1180.6208 | 590.08 | 2 ##### | 3.45 | 0.47 |
| RISGLIYEETR      | 1180.6208 | 590.08 | 2 ##### | 3.52 | 0.45 |
| RISGLIYEETR      | 1180.6208 | 590.07 | 2 ##### | 3.60 | 0.47 |
| RISGLIYEETR      | 1180.6208 | 590.06 | 2 ##### | 3.62 | 0.49 |
| RISVYYNEATGGKY   | 1301.6372 | 650.49 | 2 ##### | 3.07 | 0.65 |
| RISVYYNEATGGKY   | 1301.6372 | 650.54 | 2 ##### | 3.42 | 0.56 |
| RISVYYNEATGGKY   | 1301.6372 | 650.57 | 2 ##### | 3.48 | 0.49 |
| RISVYYNEATGGKY   | 1301.6372 | 650.53 | 2 ##### | 3.64 | 0.57 |
| RISVYYNEATGGKY   | 1301.6372 | 650.53 | 2 ##### | 3.67 | 0.57 |
| RISVYYNEATGGKY   | 1301.6372 | 650.54 | 2 ##### | 3.73 | 0.55 |
| RISVYYNEATGGKY   | 1301.6372 | 650.53 | 2 ##### | 3.73 | 0.58 |
| RISVYYNEATGGKY   | 1301.6372 | 650.53 | 2 ##### | 4.08 | 0.59 |
| RITAHLVHELRR     | 1188.6848 | 594.16 | 2 ##### | 2.60 | 0.37 |
| RITAHLVHELRR     | 1188.6848 | 594.15 | 2 ##### | 2.68 | 0.38 |
| RITAHLVHELRR     | 1188.6848 | 594.16 | 2 ##### | 2.68 | 0.37 |
| RITAHLVHELRR     | 1188.6848 | 594.19 | 2 ##### | 2.92 | 0.30 |
| RITPSYVAFTPEGERL | 1566.7799 | 783.07 | 2 ##### | 3.27 | 0.63 |
| RITPSYVAFTPEGERL | 1566.7799 | 783.09 | 2 ##### | 3.28 | 0.60 |
| RITPSYVAFTPEGERL | 1566.7799 | 783.10 | 2 ##### | 3.38 | 0.57 |
| RITPSYVAFTPEGERL | 1566.7799 | 783.08 | 2 ##### | 3.68 | 0.62 |
| RITPSYVAFTPEGERL | 1566.7799 | 783.17 | 2 ##### | 3.72 | 0.44 |
| RITSLEVENQNLRG   | 1415.7489 | 707.64 | 2 ##### | 3.77 | 0.47 |
| RITSLEVENQNLRG   | 1415.7489 | 707.65 | 2 ##### | 4.05 | 0.45 |
| RIYVGNLPPDIRT    | 1256.6997 | 628.23 | 2 ##### | 2.73 | 0.24 |
| RIYVGNLPPDIRT    | 1256.6997 | 628.15 | 2 ##### | 3.18 | 0.40 |
| RIYVGNLPPDIRT    | 1256.6997 | 628.13 | 2 ##### | 3.26 | 0.43 |
| RKADIDLTERA      | 1060.5634 | 530.14 | 2 ##### | 2.70 | 0.28 |
| RKADIDLTERA      | 1060.5634 | 530.17 | 2 ##### | 2.81 | 0.22 |
| RKASGPPVSELITKA  | 1326.7627 | 663.17 | 2 ##### | 3.31 | 0.42 |
| RKASGPPVSELITKA  | 1326.7627 | 663.14 | 2 ##### | 3.56 | 0.48 |
| RKASGPPVSELITKA  | 1326.7627 | 663.13 | 2 ##### | 3.80 | 0.51 |
| RKPLLESGTLGTKG   | 1243.7256 | 621.62 | 2 ##### | 2.73 | 0.50 |
| RKPLLESGTLGTKG   | 1243.7256 | 621.66 | 2 ##### | 2.75 | 0.41 |
| RKPLLESGTLGTKG   | 1243.7256 | 621.60 | 2 ##### | 2.79 | 0.52 |
| RLAAIQESGVERQ    | 1172.6270 | 586.10 | 2 ##### | 3.10 | 0.42 |

|                             |           |        |         |      |      |
|-----------------------------|-----------|--------|---------|------|------|
| RLAAIQESGVERQ               | 1172.6270 | 586.08 | 2 ##### | 3.15 | 0.47 |
| RLAAIQESGVERQ               | 1172.6270 | 586.08 | 2 ##### | 3.25 | 0.46 |
| RLAPDYDALDVANKI             | 1404.7006 | 702.14 | 2 ##### | 2.58 | 0.42 |
| RLAPDYDALDVANKI             | 1404.7006 | 702.21 | 2 ##### | 3.37 | 0.29 |
| RLAPDYDALDVANKI             | 1404.7006 | 702.18 | 2 ##### | 3.59 | 0.35 |
| RLAPITSDPTEAAAVGAVEASFKC    | 2145.1074 | 714.83 | 3 ##### | 3.82 | 0.62 |
| RLAPITSDPTEAAAVGAVEASFKC    | 2145.1074 | 714.85 | 3 ##### | 4.04 | 0.55 |
| RLAPITSDPTEAAAVGAVEASFKC    | 2145.1074 | 714.83 | 3 ##### | 4.20 | 0.61 |
| RLAYINPDLALEEKN             | 1488.7944 | 744.26 | 2 ##### | 3.34 | 0.27 |
| RLDGLVDTPGYIESLPKV          | 1817.9531 | 908.71 | 2 ##### | 3.71 | 0.53 |
| RLDIDSAPITARN               | 1171.6317 | 585.70 | 2 ##### | 2.50 | 0.23 |
| RLDIDSAPITARN               | 1171.6317 | 585.70 | 2 ##### | 2.75 | 0.23 |
| RLDIDSAPITARN               | 1171.6317 | 585.63 | 2 ##### | 2.75 | 0.37 |
| RLDIDSAPITARN               | 1171.6317 | 585.62 | 2 ##### | 2.97 | 0.39 |
| RLDIDSAPITARN               | 1171.6317 | 585.65 | 2 ##### | 3.03 | 0.33 |
| RLDIDSAPITARN               | 1171.6317 | 585.61 | 2 ##### | 3.28 | 0.41 |
| RLDQLIYIPLPDEKS             | 1556.8571 | 778.22 | 2 ##### | 4.13 | 0.42 |
| RLEGGSGDSEVQRT              | 1290.5920 | 645.03 | 2 ##### | 3.41 | 0.53 |
| RLEQYTNAIEGTKA              | 1366.6849 | 683.19 | 2 ##### | 2.53 | 0.31 |
| RLGHAEQKDEMVPRL             | 1525.7472 | 762.63 | 2 ##### | 3.35 | 0.49 |
| RLYGPSVSVFADDFVRS           | 1659.8013 | 829.59 | 2 ##### | 4.26 | 0.63 |
| RLYGPSVSVFADDFVRS           | 1659.8013 | 829.61 | 2 ##### | 4.32 | 0.59 |
| RNDEELNKLLGRV               | 1300.6855 | 650.20 | 2 ##### | 2.54 | 0.28 |
| RNDEELNKLLGRV               | 1300.6855 | 650.21 | 2 ##### | 2.88 | 0.27 |
| RNDEELNKLLGRV               | 1300.6855 | 650.12 | 2 ##### | 3.44 | 0.44 |
| RNELESYAYSCLKN              | 1316.6368 | 658.13 | 2 ##### | 3.09 | 0.38 |
| RNELESYAYSCLKN              | 1316.6368 | 658.08 | 2 ##### | 3.21 | 0.47 |
| RNELESYAYSCLKN              | 1316.6368 | 658.11 | 2 ##### | 3.34 | 0.42 |
| RNFILDQTNVSAQAQR            | 1647.8450 | 823.68 | 2 ##### | 5.17 | 0.48 |
| RNFILDQTNVSAQAQR            | 1647.8450 | 823.69 | 2 ##### | 5.41 | 0.46 |
| RNFLASQVPPFSRL              | 1362.7164 | 681.20 | 2 ##### | 3.10 | 0.32 |
| RNIHGSDSVESAEKE             | 1485.7180 | 742.65 | 2 ##### | 2.88 | 0.43 |
| RNLANTVTEEILEKS             | 1473.7795 | 736.69 | 2 ##### | 3.05 | 0.40 |
| RNNLAGAEELFARK              | 1304.6593 | 652.15 | 2 ##### | 3.43 | 0.37 |
| RNNLAGAEELFARK              | 1304.6593 | 652.16 | 2 ##### | 3.48 | 0.33 |
| RNNLAGAEELFARK              | 1304.6593 | 652.13 | 2 ##### | 3.54 | 0.41 |
| RNPDDITNEEYGEFYKS           | 1833.7814 | 916.60 | 2 ##### | 4.87 | 0.58 |
| RNPDDITNEEYGEFYKS           | 1833.7814 | 916.60 | 2 ##### | 5.53 | 0.59 |
| RNPDDITQEEYGEFYKS           | 1847.7970 | 923.58 | 2 ##### | 4.97 | 0.63 |
| RNPDDITQEEYGEFYKS           | 1847.7970 | 923.63 | 2 ##### | 5.23 | 0.54 |
| RNPDDITQEEYGEFYKS           | 1847.7970 | 923.61 | 2 ##### | 5.36 | 0.58 |
| RNPQNSSQSADGLRC             | 1373.6404 | 686.60 | 2 ##### | 2.75 | 0.45 |
| RNPQNSSQSADGLRC             | 1373.6404 | 686.54 | 2 ##### | 2.98 | 0.56 |
| RNPQNSSQSADGLRC             | 1373.6404 | 686.53 | 2 ##### | 3.26 | 0.58 |
| RNPQNSSQSADGLRC             | 1373.6404 | 686.57 | 2 ##### | 3.44 | 0.49 |
| RPSQVVAETRK                 | 986.5266  | 493.15 | 2 ##### | 2.86 | 0.22 |
| RQEMQEVQSSRS                | 1221.5529 | 610.59 | 2 ##### | 2.60 | 0.38 |
| RQEMQEVQSSRS                | 1221.5529 | 610.57 | 2 ##### | 2.79 | 0.42 |
| RRAPAAQPPAAAAPSAVGSPAAAAPRC | 2153.1575 | 717.54 | 3 ##### | 3.44 | 0.52 |
| RRAPAAQPPAAAAPSAVGSPAAAAPRC | 2153.1575 | 717.54 | 3 ##### | 3.48 | 0.54 |
| RRAPFDLFENKK                | 1236.6372 | 618.16 | 2 ##### | 2.95 | 0.32 |
| RRAPFDLFENKK                | 1236.6372 | 618.15 | 2 ##### | 2.99 | 0.34 |
| RRAPFDLFENKK                | 1236.6372 | 618.18 | 2 ##### | 3.02 | 0.28 |
| RRAPFDLFENRK                | 1264.6433 | 632.10 | 2 ##### | 2.67 | 0.45 |
| RRAPFDLFENRK                | 1264.6433 | 632.09 | 2 ##### | 2.92 | 0.46 |
| RRAPFDLFENRK                | 1264.6433 | 632.12 | 2 ##### | 3.18 | 0.41 |

|                      |           |        |         |      |      |
|----------------------|-----------|--------|---------|------|------|
| RRAPFDLFENRK         | 1264.6433 | 632.08 | 2 ##### | 3.40 | 0.48 |
| RRAPFDLFENRK         | 1264.6433 | 632.07 | 2 ##### | 3.43 | 0.50 |
| RRPDQQLQGDGKL        | 1241.6233 | 620.59 | 2 ##### | 2.95 | 0.45 |
| RSLDLDSIIAEVKA       | 1302.7151 | 651.19 | 2 ##### | 2.95 | 0.34 |
| RSLDLDSIIAEVKA       | 1302.7151 | 651.12 | 2 ##### | 3.70 | 0.48 |
| RSLFSSIGEVESAKL      | 1353.6897 | 676.55 | 2 ##### | 3.45 | 0.60 |
| RSLFSSIGEVESAKL      | 1353.6897 | 676.55 | 2 ##### | 3.53 | 0.58 |
| RSLFSSIGEVESAKL      | 1353.6897 | 676.54 | 2 ##### | 3.65 | 0.60 |
| RSQNVMAAASIANIVKS    | 1532.8146 | 766.24 | 2 ##### | 2.90 | 0.33 |
| RSTGEAFVQFASQEIAEKA  | 1841.8916 | 920.63 | 2 ##### | 4.88 | 0.63 |
| RSTGEAFVQFASQEIAEKA  | 1841.8916 | 920.63 | 2 ##### | 4.90 | 0.63 |
| RSTGEAFVQFASQEIAEKA  | 1841.8916 | 920.64 | 2 ##### | 4.94 | 0.62 |
| RTADGIVSHLKKQ        | 1168.6685 | 584.17 | 2 ##### | 2.70 | 0.33 |
| RTADGIVSHLKKQ        | 1168.6685 | 584.08 | 2 ##### | 3.34 | 0.50 |
| RTDGLVSLTTSKD        | 1234.6890 | 617.10 | 2 ##### | 3.14 | 0.49 |
| RTDYNASVSPDSSGPERI   | 1780.7985 | 890.14 | 2 ##### | 3.62 | 0.52 |
| RTDYNASVSPDSSGPERI   | 1780.7985 | 890.11 | 2 ##### | 3.83 | 0.59 |
| RTDYNASVSPDSSGPERI   | 1780.7985 | 890.10 | 2 ##### | 3.88 | 0.59 |
| RTEQGPQVDETQFFK      | 1506.7070 | 753.06 | 2 ##### | 3.54 | 0.59 |
| RTFIAIKPDGVQRG       | 1344.7634 | 672.23 | 2 ##### | 2.88 | 0.30 |
| RTGAIVDVPVGEELLGRV   | 1624.8905 | 812.23 | 2 ##### | 3.31 | 0.43 |
| RTGAIVDVPVGEELLGRV   | 1624.8905 | 812.20 | 2 ##### | 3.49 | 0.49 |
| RTGAIVDVPVGEELLGRV   | 1624.8905 | 812.16 | 2 ##### | 3.61 | 0.57 |
| RTGAIVDVPVGEELLGRV   | 1624.8905 | 812.19 | 2 ##### | 3.82 | 0.52 |
| RTGAIVDVPVGEELLGRV   | 1624.8905 | 812.19 | 2 ##### | 4.02 | 0.51 |
| RTGAIVDVPVGEELLGRV   | 1624.8905 | 812.18 | 2 ##### | 4.13 | 0.54 |
| RTGAIVDVPVGEELLGRV   | 1624.8905 | 812.15 | 2 ##### | 4.54 | 0.59 |
| RTGEAIVDAALSALRQ     | 1386.7587 | 693.18 | 2 ##### | 3.55 | 0.39 |
| RTGEAIVDAALSALRQ     | 1386.7587 | 693.19 | 2 ##### | 3.56 | 0.37 |
| RTNQELQEINRV         | 1244.6229 | 622.15 | 2 ##### | 2.98 | 0.32 |
| RTNQELQEINRV         | 1244.6229 | 622.15 | 2 ##### | 3.22 | 0.32 |
| RTNQELQEINRV         | 1244.6229 | 622.17 | 2 ##### | 3.27 | 0.28 |
| RTNQELQEINRV         | 1244.6229 | 622.16 | 2 ##### | 3.33 | 0.30 |
| RTTPSYVAFTADGERL     | 1450.7173 | 725.06 | 2 ##### | 2.88 | 0.60 |
| RTTPSYVAFTDTERL      | 1487.7013 | 743.61 | 2 ##### | 2.61 | 0.49 |
| RTTPSYVAFTDTERL      | 1487.7013 | 743.62 | 2 ##### | 3.00 | 0.46 |
| RTTPSYVAFTDTERL      | 1487.7013 | 743.53 | 2 ##### | 3.18 | 0.65 |
| RTTPSYVAFTDTERL      | 1487.7013 | 743.56 | 2 ##### | 3.27 | 0.57 |
| RTTPSYVAFTDTERL      | 1487.7013 | 743.54 | 2 ##### | 3.28 | 0.62 |
| RTTPSYVAFTDTERL      | 1487.7013 | 743.52 | 2 ##### | 3.28 | 0.65 |
| RTTPSYVAFTDTERL      | 1487.7013 | 743.55 | 2 ##### | 3.35 | 0.60 |
| RTTPSYVAFTDTERL      | 1487.7013 | 743.54 | 2 ##### | 3.44 | 0.62 |
| RTTPSYVAFTDTERL      | 1487.7013 | 743.58 | 2 ##### | 3.44 | 0.53 |
| RTTPSYVAFTDTERL      | 1487.7013 | 743.55 | 2 ##### | 3.48 | 0.61 |
| RTTPSYVAFTDTERL      | 1487.7013 | 743.55 | 2 ##### | 3.49 | 0.61 |
| RTTPSYVAFTDTERL      | 1487.7013 | 743.56 | 2 ##### | 3.53 | 0.57 |
| RTTPSYVAFTDTERL      | 1487.7013 | 743.53 | 2 ##### | 3.54 | 0.64 |
| RTVVAGSSEAAQKA       | 1147.5953 | 573.59 | 2 ##### | 2.93 | 0.42 |
| RTVVAGSSEAAQKA       | 1147.5953 | 573.59 | 2 ##### | 3.11 | 0.42 |
| RVAEDDEDDDDVDTKK     | 1465.5813 | 732.48 | 2 ##### | 3.97 | 0.62 |
| RVAEDDEDDDDVDTKK     | 1465.5813 | 732.48 | 2 ##### | 3.98 | 0.62 |
| RVAEDDEDDDDVDTKK     | 1465.5813 | 732.45 | 2 ##### | 4.08 | 0.67 |
| RVAEDDEDDDDVDTKK     | 1465.5813 | 732.45 | 2 ##### | 4.31 | 0.68 |
| RVAPEEHPTLLTEAPLNPKA | 1956.0437 | 651.90 | 3 ##### | 3.26 | 0.36 |
| RVAPEEHPTLLTEAPLNPKA | 1956.0437 | 651.87 | 3 ##### | 3.29 | 0.42 |
| RVAPEEHPTLLTEAPLNPKA | 1956.0437 | 651.95 | 3 ##### | 3.32 | 0.20 |

|                       |           |        |         |      |      |
|-----------------------|-----------|--------|---------|------|------|
| RVAPEEHPTLLTEAPLNPKA  | 1956.0437 | 651.91 | 3 ##### | 3.37 | 0.32 |
| RVAPEEHPTLLTEAPLNPKA  | 1956.0437 | 651.86 | 3 ##### | 3.76 | 0.48 |
| RVAPEEHPVLLTEAPLNPKA  | 1954.0645 | 651.32 | 3 ##### | 3.21 | 0.11 |
| RVAPEEHPVLLTEAPLNPKA  | 1954.0645 | 651.32 | 3 ##### | 3.83 | 0.10 |
| RVAPEEHPVLLTEAPLNPKA  | 1954.0645 | 976.85 | 2 ##### | 4.18 | 0.36 |
| RVAPEEHPVLLTEAPLNPKA  | 1954.0645 | 976.84 | 2 ##### | 4.32 | 0.38 |
| RVAVSADPNVFNIVTRL     | 1650.9174 | 825.18 | 2 ##### | 3.62 | 0.56 |
| RVEVTEFEDIKS          | 1208.6045 | 604.14 | 2 ##### | 2.74 | 0.33 |
| RVEVTEFEDIKS          | 1208.6045 | 604.07 | 2 ##### | 3.17 | 0.47 |
| RVEVTEFEDIKS          | 1208.6045 | 604.06 | 2 ##### | 3.35 | 0.48 |
| RVFIGNLNTLVVKK        | 1316.7937 | 658.21 | 2 ##### | 3.04 | 0.38 |
| RVFIGNLNTLVVKK        | 1316.7937 | 658.19 | 2 ##### | 3.27 | 0.41 |
| RVFIGNLNTLVVKK        | 1316.7937 | 658.18 | 2 ##### | 3.36 | 0.44 |
| RVGNLGLATSFNERN       | 1524.7805 | 762.13 | 2 ##### | 3.86 | 0.51 |
| RVGNLGLATSFNERN       | 1524.7805 | 762.17 | 2 ##### | 4.01 | 0.44 |
| RVHIEIGPDGRV          | 1092.5796 | 546.11 | 2 ##### | 2.56 | 0.36 |
| RVHIEIGPDGRV          | 1092.5796 | 546.05 | 2 ##### | 2.75 | 0.49 |
| RVLANPGNSQVARV        | 1225.6648 | 612.61 | 2 ##### | 3.26 | 0.44 |
| RVLANPGNSQVARV        | 1225.6648 | 612.61 | 2 ##### | 3.34 | 0.45 |
| RVLANPGNSQVARV        | 1225.6648 | 612.61 | 2 ##### | 3.58 | 0.45 |
| RVLANPGNSQVARV        | 1225.6648 | 612.61 | 2 ##### | 3.59 | 0.45 |
| RVLANPGNSQVARV        | 1225.6648 | 612.59 | 2 ##### | 3.63 | 0.49 |
| RVNVPVIGGHAGKT        | 1147.6582 | 573.60 | 2 ##### | 2.59 | 0.45 |
| RVNVPVIGGHAGKT        | 1147.6582 | 573.60 | 2 ##### | 2.59 | 0.46 |
| RVNVPVIGGHAGKT        | 1147.6582 | 573.58 | 2 ##### | 2.65 | 0.51 |
| RVREEVPLELVEAHVKK     | 1746.9749 | 582.17 | 3 ##### | 3.00 | 0.45 |
| RVSFELFADKVPKT        | 1379.7570 | 689.72 | 2 ##### | 2.55 | 0.31 |
| RVSFELFADKVPKT        | 1379.7570 | 689.72 | 2 ##### | 2.90 | 0.32 |
| RVSFELFADKVPKT        | 1379.7570 | 689.74 | 2 ##### | 3.19 | 0.28 |
| RVSFELFADKVPKT        | 1379.7570 | 689.71 | 2 ##### | 3.30 | 0.35 |
| RVSFELFADKVPKT        | 1379.7570 | 689.70 | 2 ##### | 3.32 | 0.36 |
| RVSFELFADKVPKT        | 1379.7570 | 689.68 | 2 ##### | 3.65 | 0.40 |
| RVSFELFADKVPKT        | 1379.7570 | 689.67 | 2 ##### | 3.93 | 0.42 |
| RVTIAQGGVLPNIQAVLLPKK | 1931.1688 | 965.38 | 2 ##### | 2.76 | 0.40 |
| RVTIAQGGVLPNIQAVLLPKK | 1931.1688 | 965.33 | 2 ##### | 3.06 | 0.51 |
| RVTIAQGGVLPNIQAVLLPKK | 1931.1688 | 965.38 | 2 ##### | 3.51 | 0.42 |
| RVTIAQGGVLPNIQAVLLPKK | 1931.1688 | 965.33 | 2 ##### | 3.68 | 0.50 |
| RVTIAQGGVLPNIQAVLLPKK | 1931.1688 | 965.30 | 2 ##### | 4.19 | 0.58 |
| RVTIAQGGVLPNIQAVLLPKK | 1931.1688 | 965.32 | 2 ##### | 4.33 | 0.54 |
| RVTIAQGGVLPNIQAVLLPKK | 1931.1688 | 965.29 | 2 ##### | 4.33 | 0.60 |
| RVTIAQGGVLPNIQAVLLPKK | 1931.1688 | 965.32 | 2 ##### | 4.40 | 0.53 |
| RVTIAQGGVLPNIQAVLLPKK | 1931.1688 | 965.31 | 2 ##### | 4.43 | 0.56 |
| RVTIAQGGVLPNIQAVLLPKK | 1931.1688 | 965.31 | 2 ##### | 4.52 | 0.56 |
| RVTIAQGGVLPNIQAVLLPKK | 1931.1688 | 965.33 | 2 ##### | 4.56 | 0.52 |
| RVTIAQGGVLPNIQAVLLPKK | 1931.1688 | 643.55 | 3 ##### | 4.97 | 0.52 |
| RVTIAQGGVLPNIQAVLLPKK | 1931.1688 | 965.25 | 2 ##### | 5.04 | 0.67 |
| RVTIAQGGVLPNIQAVLLPKK | 1931.1688 | 643.51 | 3 ##### | 5.07 | 0.64 |
| RVTIAQGGVLPNIQAVLLPKK | 1931.1688 | 965.30 | 2 ##### | 5.37 | 0.58 |
| RVTIAQGGVLPNIQAVLLPKK | 1931.1688 | 643.51 | 3 ##### | 5.38 | 0.63 |
| RVTIAQGGVLPNIQAVLLPKK | 1931.1688 | 965.25 | 2 ##### | 5.50 | 0.67 |
| RVVLIGGKPDREV         | 1053.6415 | 526.63 | 2 ##### | 2.56 | 0.39 |
| RYALYDATYETKE         | 1337.6260 | 668.54 | 2 ##### | 2.63 | 0.54 |
| RYALYDATYETKE         | 1337.6260 | 668.54 | 2 ##### | 3.27 | 0.55 |
| RYALYDATYETKE         | 1337.6260 | 668.52 | 2 ##### | 3.27 | 0.59 |
| RYALYDATYETKE         | 1337.6260 | 668.56 | 2 ##### | 3.52 | 0.51 |
| RYESLTDPSKLDGSGKE     | 1539.7537 | 769.60 | 2 ##### | 3.87 | 0.55 |



|                          |                                    |                                       |            |              |             |
|--------------------------|------------------------------------|---------------------------------------|------------|--------------|-------------|
| RYITPDQLADLYKS           | 1439.7417                          | 719.59                                | 2 #####    | 2.80         | 0.57        |
| RYITPDQLADLYKS           | 1439.7417                          | 719.63                                | 2 #####    | 2.98         | 0.49        |
| RYITPDQLADLYKS           | 1439.7417                          | 719.63                                | 2 #####    | 3.16         | 0.47        |
| RYITPDQLADLYKS           | 1439.7417                          | 719.61                                | 2 #####    | 3.27         | 0.51        |
| RYITPDQLADLYKS           | 1439.7417                          | 719.63                                | 2 #####    | 3.27         | 0.48        |
| RYITPDQLADLYKS           | 1439.7417                          | 719.64                                | 2 #####    | 3.36         | 0.46        |
| RYITPDQLADLYKS           | 1439.7417                          | 719.62                                | 2 #####    | 3.38         | 0.49        |
| RYITPDQLADLYKS           | 1439.7417                          | 719.61                                | 2 #####    | 3.62         | 0.53        |
| RYITPDQLADLYKS           | 1439.7417                          | 719.62                                | 2 #####    | 3.77         | 0.51        |
| RYLAEFATGNDRKE           | 1384.6855                          | 692.14                                | 2 #####    | 2.62         | 0.42        |
| RYLAEFATGNDRKE           | 1384.6855                          | 692.13                                | 2 #####    | 2.83         | 0.42        |
| RYLAEFATGNDRKE           | 1384.6855                          | 692.15                                | 2 #####    | 2.89         | 0.38        |
| RYLAEVAAGDDKKG           | 1279.6528                          | 639.64                                | 2 #####    | 3.38         | 0.38        |
| RYLAEVAAGDDKKG           | 1279.6528                          | 639.63                                | 2 #####    | 3.53         | 0.39        |
| RYLAEVAAGDDKKG           | 1279.6528                          | 639.67                                | 2 #####    | 3.73         | 0.31        |
| RYLSEVASGENKQ            | 1196.5793                          | 598.10                                | 2 #####    | 2.94         | 0.39        |
| RYLSEVASGENKQ            | 1196.5793                          | 598.05                                | 2 #####    | 3.20         | 0.47        |
| <b>Peptide Sequence*</b> | <b>Actual Mass (D<sub>z</sub>)</b> | <b>Precursor Mass (D<sub>i</sub>)</b> | <b>m/z</b> | <b>Xcorr</b> | <b>Δ CN</b> |

z, peptide charge state; m, peptide mass; m/z, mass-to-charge ratio; Xcorr, cross-correlation of emp  
 \* Peptide(s) identified in genital ridges from 11.5 dpc male (light blue), 12.0 dpc male (dark blue), 11

**Sp RSp Ion Count**

|        |   |       |
|--------|---|-------|
| 716.68 | 1 | 17/24 |
| 609.34 | 1 | 17/24 |
| 747.97 | 1 | 17/24 |
| 733.33 | 2 | 17/24 |
| 475.51 | 4 | 15/24 |
| 530.93 | 2 | 16/24 |
| #####  | 1 | 25/36 |
| #####  | 1 | 27/36 |
| #####  | 1 | 26/36 |
| #####  | 1 | 26/36 |
| 499.41 | 3 | 16/28 |
| 611.87 | 4 | 17/28 |
| 796.85 | 1 | 16/22 |
| 676.41 | 1 | 16/22 |
| 623.58 | 4 | 16/22 |
| 935.37 | 1 | 17/22 |
| 461.30 | 4 | 13/22 |
| 765.90 | 1 | 17/22 |
| 690.47 | 1 | 16/22 |
| 721.26 | 1 | 16/22 |
| 847.08 | 1 | 17/22 |
| 685.93 | 2 | 16/22 |
| 730.89 | 1 | 16/22 |
| 724.54 | 1 | 17/22 |
| 547.10 | 1 | 15/22 |
| 929.00 | 1 | 16/22 |
| 657.97 | 2 | 15/22 |
| #####  | 1 | 19/22 |
| #####  | 1 | 18/22 |
| 991.34 | 1 | 18/22 |
| 948.04 | 1 | 17/22 |
| 981.46 | 1 | 18/22 |
| 827.95 | 2 | 16/22 |
| 651.59 | 3 | 16/22 |
| 928.79 | 1 | 17/22 |
| 898.64 | 1 | 17/22 |
| #####  | 1 | 17/22 |
| 768.06 | 1 | 16/22 |
| 849.80 | 1 | 17/22 |
| 702.91 | 2 | 16/22 |
| 674.66 | 3 | 15/22 |
| 768.13 | 2 | 16/22 |
| 646.40 | 2 | 15/22 |
| 647.19 | 2 | 16/22 |
| 683.01 | 1 | 17/22 |
| 815.47 | 1 | 17/22 |
| 536.31 | 2 | 15/22 |
| #####  | 1 | 18/22 |
| 785.45 | 1 | 16/22 |
| 952.81 | 1 | 17/22 |
| 936.28 | 1 | 18/22 |
| 515.91 | 1 | 16/22 |
| 942.85 | 1 | 16/22 |

|        |   |       |
|--------|---|-------|
| 608.02 | 1 | 15/22 |
| 895.58 | 1 | 16/22 |
| 892.01 | 2 | 17/22 |
| 629.50 | 2 | 16/22 |
| 949.16 | 1 | 17/22 |
| 843.83 | 2 | 17/22 |
| 882.83 | 2 | 17/22 |
| 934.51 | 1 | 17/22 |
| 855.75 | 1 | 16/22 |
| #####  | 2 | 17/22 |
| #####  | 1 | 19/22 |
| 997.04 | 1 | 19/22 |
| 965.16 | 1 | 16/22 |
| #####  | 1 | 18/22 |
| 976.86 | 1 | 17/22 |
| #####  | 1 | 19/22 |
| 878.25 | 2 | 17/22 |
| 816.26 | 1 | 16/22 |
| #####  | 1 | 18/22 |
| #####  | 1 | 18/22 |
| #####  | 1 | 19/22 |
| 988.58 | 1 | 17/22 |
| #####  | 1 | 18/22 |
| #####  | 1 | 18/22 |
| #####  | 2 | 17/22 |
| 741.08 | 1 | 16/22 |
| #####  | 1 | 19/22 |
| #####  | 1 | 19/22 |
| #####  | 1 | 19/22 |
| 810.03 | 1 | 15/20 |
| 994.48 | 1 | 16/20 |
| 597.28 | 1 | 18/28 |
| #####  | 1 | 21/28 |
| 704.79 | 1 | 21/40 |
| 427.92 | 2 | 17/24 |
| #####  | 1 | 20/24 |
| #####  | 1 | 20/24 |
| #####  | 1 | 20/24 |
| #####  | 1 | 20/24 |
| #####  | 1 | 20/24 |
| #####  | 1 | 20/24 |
| #####  | 1 | 20/24 |
| 691.41 | 2 | 18/30 |
| #####  | 1 | 20/30 |
| 765.82 | 1 | 18/26 |
| 776.71 | 1 | 18/26 |
| 849.44 | 1 | 19/26 |
| 588.75 | 1 | 16/22 |
| 732.69 | 1 | 17/22 |
| 626.25 | 1 | 16/22 |
| 658.24 | 2 | 16/22 |
| 893.68 | 1 | 17/22 |
| 884.21 | 1 | 18/22 |
| #####  | 1 | 19/22 |
| #####  | 1 | 19/22 |
| #####  | 1 | 18/22 |

|        |   |       |
|--------|---|-------|
| #####  | 1 | 19/22 |
| #####  | 1 | 21/30 |
| 573.16 | 3 | 16/26 |
| 633.47 | 2 | 17/26 |
| #####  | 1 | 22/26 |
| #####  | 1 | 20/26 |
| #####  | 1 | 23/26 |
| #####  | 1 | 23/26 |
| #####  | 1 | 23/26 |
| #####  | 1 | 23/26 |
| 849.49 | 1 | 18/26 |
| 855.32 | 1 | 19/26 |
| 592.46 | 3 | 15/22 |
| 633.37 | 4 | 16/22 |
| #####  | 1 | 21/32 |
| #####  | 1 | 21/32 |
| #####  | 1 | 21/32 |
| #####  | 1 | 22/32 |
| #####  | 1 | 19/24 |
| #####  | 1 | 19/24 |
| #####  | 1 | 20/24 |
| #####  | 1 | 20/24 |
| 957.39 | 1 | 19/26 |
| #####  | 1 | 21/30 |
| #####  | 1 | 23/30 |
| #####  | 1 | 22/30 |
| #####  | 1 | 21/30 |
| #####  | 1 | 24/30 |
| #####  | 1 | 23/30 |
| #####  | 1 | 24/30 |
| #####  | 1 | 24/30 |
| #####  | 1 | 24/30 |
| #####  | 1 | 24/30 |
| #####  | 1 | 25/30 |
| #####  | 1 | 21/26 |
| #####  | 1 | 20/26 |
| #####  | 1 | 21/26 |
| #####  | 1 | 20/26 |
| #####  | 1 | 20/26 |
| #####  | 1 | 19/26 |
| #####  | 1 | 20/26 |
| #####  | 1 | 21/26 |
| #####  | 1 | 19/26 |
| #####  | 1 | 20/26 |
| #####  | 1 | 20/26 |
| #####  | 1 | 20/26 |
| #####  | 1 | 18/26 |
| #####  | 1 | 22/26 |
| #####  | 1 | 20/26 |
| #####  | 1 | 20/26 |
| #####  | 1 | 20/26 |
| #####  | 1 | 18/26 |
| #####  | 1 | 22/26 |
| #####  | 1 | 20/26 |
| #####  | 1 | 20/26 |
| #####  | 1 | 20/26 |
| #####  | 1 | 21/26 |
| 592.54 | 1 | 16/22 |
| 622.86 | 2 | 16/22 |

|        |   |       |
|--------|---|-------|
| 961.62 | 1 | 17/22 |
| 925.44 | 1 | 18/22 |
| 989.97 | 1 | 18/22 |
| #####  | 1 | 19/22 |
| #####  | 1 | 18/22 |
| 914.14 | 2 | 15/18 |
| 822.26 | 1 | 15/18 |
| 706.17 | 1 | 19/30 |
| 722.04 | 3 | 16/22 |
| 854.04 | 1 | 18/22 |
| 696.18 | 2 | 17/22 |
| 710.54 | 1 | 16/22 |
| 745.06 | 4 | 16/22 |
| 761.79 | 1 | 17/22 |
| 479.95 | 3 | 15/22 |
| 673.98 | 1 | 17/22 |
| 810.00 | 2 | 18/22 |
| 605.91 | 1 | 17/22 |
| #####  | 1 | 20/22 |
| 575.87 | 2 | 16/22 |
| #####  | 1 | 19/22 |
| 971.58 | 1 | 16/22 |
| 875.74 | 1 | 18/22 |
| #####  | 1 | 19/22 |
| 754.48 | 1 | 17/22 |
| 966.29 | 1 | 19/22 |
| 742.82 | 1 | 17/22 |
| #####  | 1 | 19/22 |
| #####  | 1 | 20/22 |
| #####  | 1 | 19/22 |
| #####  | 1 | 19/22 |
| #####  | 1 | 19/22 |
| #####  | 1 | 20/22 |
| #####  | 1 | 20/22 |
| #####  | 1 | 19/22 |
| #####  | 1 | 17/22 |
| #####  | 1 | 20/22 |
| 664.75 | 1 | 17/36 |
| #####  | 1 | 19/36 |
| #####  | 1 | 23/36 |
| #####  | 1 | 22/36 |
| #####  | 1 | 21/36 |
| #####  | 1 | 22/36 |
| #####  | 1 | 23/36 |
| #####  | 1 | 23/36 |
| #####  | 1 | 19/36 |
| #####  | 1 | 24/36 |
| #####  | 1 | 24/36 |
| #####  | 1 | 25/36 |
| #####  | 1 | 24/36 |
| #####  | 1 | 26/36 |
| #####  | 1 | 23/36 |
| #####  | 1 | 25/36 |
| #####  | 1 | 24/36 |
| #####  | 1 | 24/36 |
| #####  | 1 | 25/36 |
| #####  | 1 | 24/36 |

##### 1 25/36  
##### 1 26/36  
457.39 4 16/24  
707.55 2 19/24  
788.02 1 20/24  
552.16 4 17/24  
##### 1 23/36  
##### 1 26/36  
778.17 1 21/36  
##### 1 24/36  
##### 1 21/24  
##### 1 21/24  
##### 1 22/24  
##### 1 22/24  
##### 1 21/24  
##### 1 22/24  
569.00 3 15/24  
##### 1 21/24  
808.35 1 18/24  
##### 1 21/24  
##### 1 21/24  
790.15 1 17/24  
##### 1 19/24  
##### 1 19/24  
##### 1 20/24  
##### 1 20/24  
##### 1 21/24  
##### 1 20/24  
711.52 1 17/22  
##### 1 19/22  
945.00 1 18/22  
610.19 2 15/20  
##### 1 17/20  
##### 1 18/20  
##### 1 19/20  
372.57 4 14/22  
##### 1 16/22  
982.18 1 18/24  
885.62 1 16/20  
##### 1 17/20  
##### 1 17/20  
950.43 1 16/20  
##### 1 17/20  
##### 1 17/20  
769.76 1 17/22  
##### 1 18/22  
990.51 1 18/22  
796.44 1 16/22  
##### 1 18/22  
649.64 1 16/20  
##### 1 16/20  
630.97 1 14/24  
##### 1 18/24  
##### 1 18/24  
620.82 1 17/22  
##### 1 18/22

|        |   |       |
|--------|---|-------|
| 637.55 | 1 | 13/18 |
| 625.50 | 1 | 15/22 |
| #####  | 1 | 33/64 |
| #####  | 3 | 27/64 |
| 602.43 | 4 | 15/20 |
| 379.68 | 3 | 15/20 |
| #####  | 1 | 17/20 |
| #####  | 1 | 18/20 |
| #####  | 1 | 18/20 |
| #####  | 1 | 18/20 |
| 913.40 | 1 | 16/20 |
| 826.93 | 1 | 16/20 |
| 664.82 | 2 | 14/20 |
| 727.17 | 1 | 15/20 |
| #####  | 1 | 17/20 |
| #####  | 1 | 17/20 |
| #####  | 1 | 17/20 |
| #####  | 1 | 17/20 |
| #####  | 1 | 17/20 |
| #####  | 1 | 17/20 |
| #####  | 1 | 17/20 |
| #####  | 1 | 17/20 |
| #####  | 1 | 17/20 |
| #####  | 1 | 17/20 |
| #####  | 1 | 18/20 |
| 823.21 | 1 | 17/22 |
| #####  | 1 | 19/22 |
| #####  | 3 | 29/56 |
| #####  | 1 | 32/56 |
| #####  | 1 | 30/56 |
| 707.28 | 1 | 17/24 |
| #####  | 1 | 20/22 |
| #####  | 1 | 20/22 |
| #####  | 1 | 18/22 |
| #####  | 1 | 19/22 |
| #####  | 1 | 19/22 |
| 795.64 | 1 | 14/18 |
| #####  | 1 | 16/18 |
| #####  | 2 | 16/18 |
| #####  | 1 | 16/18 |
| #####  | 1 | 17/18 |
| #####  | 1 | 16/18 |
| #####  | 1 | 16/18 |
| #####  | 1 | 16/18 |
| #####  | 1 | 17/18 |
| 727.06 | 1 | 19/26 |
| 807.85 | 1 | 19/26 |
| #####  | 1 | 18/20 |
| #####  | 1 | 17/20 |
| 975.74 | 1 | 16/20 |
| 617.91 | 2 | 14/20 |
| 641.58 | 3 | 14/20 |
| 663.85 | 2 | 14/20 |
| 736.24 | 2 | 15/20 |
| 798.02 | 3 | 16/20 |
| 783.99 | 2 | 16/20 |
| 838.01 | 2 | 16/20 |

|        |   |       |
|--------|---|-------|
| 974.63 | 1 | 19/24 |
| #####  | 1 | 18/24 |
| #####  | 1 | 19/24 |
| #####  | 1 | 19/24 |
| #####  | 1 | 18/24 |
| #####  | 1 | 20/24 |
| #####  | 1 | 20/24 |
| #####  | 1 | 20/24 |
| #####  | 1 | 21/24 |
| #####  | 1 | 21/24 |
| 953.82 | 1 | 18/26 |
| 866.03 | 1 | 19/26 |
| 914.72 | 1 | 19/26 |
| 600.50 | 1 | 18/26 |
| #####  | 1 | 19/26 |
| 953.11 | 3 | 15/20 |
| 908.60 | 1 | 15/20 |
| #####  | 1 | 17/20 |
| 451.57 | 4 | 13/18 |
| 868.10 | 1 | 15/18 |
| 893.74 | 1 | 15/18 |
| #####  | 1 | 18/24 |
| 313.13 | 1 | 14/30 |
| 667.22 | 1 | 20/30 |
| 774.37 | 1 | 21/30 |
| 893.19 | 1 | 22/30 |
| 973.66 | 1 | 23/30 |
| 574.69 | 1 | 18/32 |
| 634.39 | 2 | 18/32 |
| 839.88 | 1 | 21/32 |
| 864.51 | 1 | 21/32 |
| 833.41 | 1 | 20/32 |
| 859.21 | 1 | 18/24 |
| 348.05 | 3 | 17/24 |
| 524.20 | 1 | 18/24 |
| 536.42 | 1 | 18/24 |
| 332.78 | 1 | 16/24 |
| 673.88 | 4 | 15/26 |
| 667.12 | 3 | 15/26 |
| 736.70 | 3 | 16/26 |
| 697.34 | 2 | 16/26 |
| 623.48 | 1 | 19/36 |
| 711.30 | 1 | 19/36 |
| 794.86 | 1 | 20/36 |
| 522.54 | 1 | 20/36 |
| #####  | 1 | 23/36 |
| #####  | 1 | 25/38 |
| #####  | 1 | 16/20 |
| #####  | 1 | 17/20 |
| #####  | 1 | 17/20 |
| #####  | 1 | 17/20 |
| 523.48 | 3 | 15/22 |
| 532.13 | 2 | 14/22 |
| 861.35 | 1 | 17/22 |
| #####  | 1 | 18/22 |
| 458.23 | 3 | 13/22 |



|        |   |       |
|--------|---|-------|
| 623.80 | 1 | 16/22 |
| 925.17 | 1 | 16/22 |
| 818.80 | 1 | 16/22 |
| 843.02 | 2 | 16/22 |
| 619.23 | 2 | 13/22 |
| #####  | 1 | 17/22 |
| #####  | 1 | 17/22 |
| #####  | 1 | 18/22 |
| 864.53 | 1 | 17/22 |
| 847.85 | 1 | 18/22 |
| #####  | 1 | 17/22 |
| #####  | 1 | 18/22 |
| #####  | 1 | 18/22 |
| #####  | 1 | 18/22 |
| #####  | 1 | 18/22 |
| #####  | 1 | 18/22 |
| #####  | 1 | 19/22 |
| #####  | 1 | 18/22 |
| #####  | 1 | 18/22 |
| #####  | 1 | 19/22 |
| #####  | 1 | 19/22 |
| #####  | 1 | 18/22 |
| #####  | 1 | 18/22 |
| #####  | 1 | 18/22 |
| 651.90 | 2 | 14/20 |
| 712.67 | 1 | 15/20 |
| 740.20 | 1 | 15/20 |
| 703.74 | 4 | 15/20 |
| 530.38 | 3 | 13/20 |
| 907.44 | 2 | 18/26 |
| 763.46 | 2 | 16/26 |
| 762.70 | 2 | 13/18 |
| #####  | 1 | 17/18 |
| 763.62 | 4 | 15/18 |
| #####  | 1 | 17/18 |
| #####  | 1 | 17/18 |
| #####  | 1 | 17/18 |
| #####  | 1 | 17/18 |
| #####  | 1 | 16/18 |
| 826.24 | 1 | 20/24 |
| #####  | 1 | 22/24 |
| #####  | 1 | 22/24 |
| #####  | 1 | 22/24 |
| #####  | 1 | 23/24 |
| 523.33 | 1 | 14/20 |
| 793.65 | 1 | 15/20 |
| 736.34 | 1 | 15/20 |
| 662.25 | 1 | 15/20 |
| 734.97 | 1 | 15/20 |
| 643.41 | 1 | 15/20 |
| 857.98 | 1 | 16/20 |
| 983.25 | 1 | 16/20 |
| #####  | 1 | 21/30 |
| #####  | 1 | 23/30 |
| #####  | 1 | 23/30 |
| #####  | 1 | 23/30 |
| #####  | 1 | 21/26 |
| #####  | 1 | 22/26 |
| #####  | 1 | 23/26 |

##### 1 23/26  
975.71 3 14/16  
985.81 2 14/16  
957.52 2 14/16  
849.82 1 14/16  
##### 1 22/26  
##### 1 23/26  
##### 1 23/26  
##### 1 28/68  
##### 3 16/20  
##### 2 17/20  
##### 1 17/20  
689.74 3 17/20  
697.18 2 14/18  
872.88 1 16/18  
873.26 1 14/18  
##### 1 16/18  
809.16 1 15/18  
795.65 1 14/18  
##### 1 19/26  
900.06 1 21/34  
##### 1 26/34  
##### 1 24/34  
##### 1 24/34  
##### 1 25/34  
##### 1 25/34  
##### 1 25/34  
932.70 1 19/36  
##### 1 23/36  
##### 1 25/36  
##### 1 22/36  
##### 1 24/36  
##### 1 25/36  
##### 1 25/36  
##### 1 18/22  
##### 1 16/22  
##### 1 21/26  
##### 1 20/26  
##### 1 22/26  
962.87 1 18/26  
##### 1 19/26  
##### 1 19/26  
969.64 1 18/26  
##### 1 20/26  
708.42 3 16/26  
##### 1 21/26  
##### 1 21/26  
##### 1 18/26  
##### 1 20/26  
##### 1 21/26  
##### 1 21/26  
805.43 1 15/22  
##### 1 17/22  
##### 1 17/22  
808.76 1 15/22  
##### 1 16/22

|        |   |       |
|--------|---|-------|
| #####  | 1 | 16/22 |
| #####  | 1 | 18/22 |
| #####  | 2 | 17/22 |
| #####  | 1 | 18/22 |
| 598.12 | 1 | 17/24 |
| 558.41 | 1 | 16/24 |
| 518.73 | 1 | 16/24 |
| 582.46 | 1 | 17/24 |
| 752.97 | 1 | 19/26 |
| #####  | 1 | 19/26 |
| 756.36 | 1 | 19/26 |
| #####  | 1 | 20/26 |
| 853.94 | 1 | 19/26 |
| #####  | 1 | 19/26 |
| #####  | 1 | 19/26 |
| 798.19 | 1 | 19/26 |
| #####  | 1 | 20/26 |
| #####  | 1 | 20/26 |
| #####  | 1 | 20/26 |
| 841.24 | 1 | 19/28 |
| 973.69 | 1 | 19/28 |
| #####  | 1 | 20/28 |
| 726.60 | 2 | 16/26 |
| #####  | 1 | 18/26 |
| #####  | 1 | 20/26 |
| #####  | 1 | 20/26 |
| #####  | 1 | 20/26 |
| #####  | 1 | 20/26 |
| 519.09 | 2 | 14/26 |
| #####  | 1 | 18/26 |
| 334.50 | 2 | 18/28 |
| 812.45 | 2 | 17/22 |
| 672.94 | 3 | 16/22 |
| 683.00 | 1 | 17/22 |
| 811.63 | 1 | 17/22 |
| 702.09 | 2 | 16/22 |
| 665.80 | 1 | 16/22 |
| #####  | 1 | 18/22 |
| 682.05 | 1 | 16/22 |
| 879.14 | 1 | 17/22 |
| #####  | 1 | 25/36 |
| #####  | 1 | 25/36 |
| #####  | 1 | 18/20 |
| 975.33 | 1 | 16/20 |
| #####  | 1 | 17/20 |
| #####  | 1 | 18/20 |
| #####  | 1 | 17/20 |
| #####  | 1 | 41/96 |
| 789.11 | 2 | 16/24 |
| 643.99 | 3 | 15/24 |
| 751.47 | 1 | 17/24 |
| 954.69 | 1 | 16/24 |
| 905.78 | 2 | 19/28 |
| 867.41 | 2 | 18/28 |
| 771.86 | 4 | 18/28 |
| 970.01 | 1 | 19/28 |



##### 1 19/24  
##### 1 22/24  
##### 1 20/24  
644.34 1 19/28  
##### 1 30/56  
##### 1 26/56  
##### 1 21/28  
##### 1 21/28  
##### 1 23/28  
##### 1 25/28  
##### 1 24/28  
##### 1 23/28  
##### 1 33/56  
##### 1 33/56  
##### 1 26/28  
##### 1 33/56  
##### 1 28/56  
##### 1 27/56  
##### 1 27/56  
##### 1 29/56  
##### 1 32/56  
##### 1 32/56  
##### 1 32/56  
##### 1 34/56  
##### 1 34/56  
##### 1 23/28  
##### 1 33/56  
##### 1 24/28  
##### 1 28/56  
##### 1 31/56  
##### 1 22/28  
##### 1 23/28  
##### 1 18/22  
##### 1 18/22  
##### 1 18/22  
812.86 1 17/22  
904.06 1 18/22  
876.89 1 17/22  
889.49 1 17/22  
841.06 1 17/20  
##### 1 30/60  
##### 1 29/60  
##### 1 31/60  
##### 1 32/60  
410.94 1 17/30  
705.95 1 16/20  
724.55 1 16/20  
##### 1 19/24  
##### 1 19/24  
##### 1 19/24  
##### 1 21/24  
##### 1 21/24  
677.50 1 17/20  
##### 1 18/20  
666.39 1 17/20  
##### 1 18/20

##### 1 18/20  
##### 1 18/20  
##### 1 18/20  
##### 1 18/20  
##### 1 18/20  
##### 1 18/20  
##### 1 18/20  
##### 1 18/20  
689.00 3 16/28  
653.46 1 17/28  
##### 1 19/28  
##### 1 23/28  
##### 1 23/28  
##### 1 22/28  
##### 1 23/28  
##### 1 23/28  
##### 1 23/28  
##### 1 23/28  
##### 1 24/28  
##### 1 24/28  
##### 1 23/28  
##### 1 23/28  
##### 1 23/28  
839.16 3 16/20  
820.27 4 15/20  
741.19 2 16/20  
##### 2 17/20  
##### 1 17/20  
##### 1 18/20  
470.65 2 15/26  
872.55 4 18/26  
##### 1 21/26  
##### 2 20/26  
##### 1 19/26  
##### 1 20/26  
##### 1 21/26  
##### 2 21/26  
##### 1 21/26  
##### 1 21/26  
##### 1 21/26  
550.82 2 17/26  
576.47 3 16/26  
634.03 2 20/26  
##### 1 20/26  
##### 1 20/26  
##### 1 23/26  
##### 1 22/26  
##### 1 21/28  
##### 1 30/56  
##### 1 23/28  
##### 1 23/28  
##### 1 22/28  
##### 1 23/28  
##### 1 23/28  
##### 1 21/28  
##### 1 22/28

##### 1 23/28  
##### 1 22/28  
619.28 2 16/20  
##### 1 18/20  
945.26 1 18/20  
864.39 1 18/20  
992.11 1 18/20  
778.54 1 17/20  
##### 1 17/20  
751.25 1 16/20  
564.17 1 18/34  
##### 1 23/34  
##### 1 26/34  
##### 1 23/34  
776.73 2 15/22  
580.02 2 15/22  
##### 1 19/22  
##### 1 19/22  
##### 1 19/22  
##### 1 19/22  
##### 1 19/22  
##### 1 20/22  
##### 1 19/22  
##### 1 17/22  
##### 1 19/22  
##### 1 19/22  
##### 1 19/22  
573.83 1 14/18  
##### 1 16/18  
##### 2 16/18  
##### 1 16/18  
##### 1 16/18  
##### 1 16/18  
##### 1 30/60  
##### 1 23/30  
966.85 1 20/30  
##### 1 22/30  
##### 1 22/30  
##### 1 23/30  
480.11 3 16/28  
915.53 1 19/28  
914.84 1 19/28  
##### 1 31/56  
765.26 1 27/56  
##### 1 19/28  
##### 1 33/56  
843.28 1 28/56  
##### 1 20/28  
##### 1 31/56  
##### 1 22/28  
##### 1 21/28  
##### 1 21/28  
953.16 1 19/28  
##### 1 22/28  
##### 1 21/28  
##### 1 23/28

466.50 1 20/36  
689.05 1 23/36  
561.20 1 22/36  
976.09 1 25/36  
624.38 1 22/36  
436.24 1 19/36  
626.44 3 14/18  
882.42 1 15/18  
##### 1 15/18  
990.55 1 15/18  
##### 1 16/18  
##### 1 16/18  
##### 1 16/18  
##### 1 16/18  
##### 1 19/26  
##### 1 21/26  
823.94 2 16/32  
##### 1 20/24  
##### 1 21/24  
##### 1 21/24  
##### 1 19/24  
##### 1 20/24  
628.92 4 15/24  
655.99 3 18/28  
##### 1 18/24  
##### 1 18/24  
952.75 1 17/24  
##### 1 17/24  
##### 1 19/24  
682.07 1 17/20  
##### 1 18/20  
##### 1 18/20  
##### 1 18/20  
##### 1 19/26  
##### 1 21/32  
##### 1 20/32  
##### 1 22/32  
712.61 1 15/26  
686.04 3 15/26  
688.47 1 27/52  
##### 1 21/26  
##### 1 21/26  
##### 1 22/26  
##### 1 22/26  
##### 1 21/26  
397.63 3 15/24  
##### 1 18/22  
921.70 1 17/22  
784.20 4 17/22  
##### 1 19/22  
857.09 1 18/22  
##### 1 19/22  
##### 1 20/22  
##### 1 20/22  
##### 1 20/22  
##### 1 20/22  
##### 1 20/22



|        |   |       |
|--------|---|-------|
| #####  | 1 | 20/22 |
| #####  | 1 | 20/22 |
| 636.73 | 1 | 17/32 |
| 744.11 | 1 | 18/32 |
| 865.20 | 1 | 18/32 |
| 666.44 | 1 | 17/32 |
| 867.44 | 1 | 19/32 |
| 833.50 | 1 | 19/32 |
| 754.40 | 1 | 18/32 |
| 969.74 | 1 | 20/32 |
| 758.65 | 1 | 18/32 |
| 742.20 | 1 | 18/32 |
| 849.48 | 1 | 19/32 |
| #####  | 1 | 26/52 |
| #####  | 4 | 25/52 |
| #####  | 1 | 27/52 |
| 690.25 | 1 | 16/20 |
| 662.24 | 3 | 16/20 |
| 641.72 | 2 | 16/20 |
| 809.78 | 1 | 18/20 |
| #####  | 1 | 17/18 |
| 696.62 | 1 | 14/16 |
| 519.15 | 1 | 13/16 |
| 632.52 | 2 | 13/16 |
| 769.17 | 1 | 14/16 |
| 684.01 | 1 | 14/16 |
| 849.29 | 1 | 21/26 |
| 792.36 | 4 | 23/52 |
| #####  | 1 | 29/52 |
| #####  | 1 | 29/52 |
| #####  | 1 | 26/52 |
| 992.59 | 1 | 22/26 |
| 611.60 | 1 | 18/24 |
| 718.51 | 2 | 16/24 |
| 531.35 | 1 | 16/24 |
| 936.28 | 1 | 18/24 |
| 751.47 | 1 | 18/24 |
| #####  | 1 | 21/24 |
| #####  | 1 | 19/24 |
| 542.41 | 3 | 15/22 |
| #####  | 1 | 19/22 |
| #####  | 1 | 20/22 |
| #####  | 1 | 20/22 |
| #####  | 1 | 19/22 |
| #####  | 1 | 19/22 |
| 827.47 | 1 | 19/24 |
| 707.21 | 1 | 17/24 |
| 888.44 | 2 | 19/24 |
| 842.31 | 1 | 18/24 |
| 790.56 | 2 | 19/24 |
| 542.65 | 1 | 15/20 |
| 363.83 | 1 | 13/18 |
| 312.18 | 2 | 43435 |
| 343.25 | 4 | 13/18 |
| 440.33 | 1 | 13/18 |
| 374.23 | 3 | 13/18 |

|        |   |       |
|--------|---|-------|
| 296.59 | 3 | 43435 |
| 394.59 | 1 | 13/18 |
| 525.35 | 1 | 17/22 |
| #####  | 1 | 22/26 |
| #####  | 1 | 22/26 |
| 575.57 | 1 | 15/20 |
| 990.26 | 1 | 17/20 |
| 924.50 | 1 | 17/20 |
| #####  | 1 | 18/20 |
| #####  | 1 | 18/20 |
| #####  | 1 | 23/34 |
| #####  | 1 | 24/34 |
| #####  | 1 | 25/34 |
| #####  | 1 | 23/34 |
| #####  | 1 | 26/34 |
| #####  | 1 | 25/34 |
| #####  | 1 | 18/28 |
| #####  | 1 | 23/28 |
| #####  | 1 | 23/28 |
| #####  | 1 | 23/28 |
| #####  | 1 | 23/28 |
| 832.95 | 1 | 18/28 |
| #####  | 1 | 22/28 |
| #####  | 1 | 22/28 |
| 592.56 | 1 | 20/26 |
| 472.94 | 1 | 18/26 |
| 453.40 | 3 | 15/24 |
| 740.32 | 1 | 17/24 |
| #####  | 1 | 23/30 |
| #####  | 1 | 18/22 |
| #####  | 1 | 19/22 |
| #####  | 1 | 18/22 |
| #####  | 1 | 18/22 |
| 681.05 | 2 | 15/24 |
| 454.76 | 2 | 15/24 |
| 597.67 | 1 | 17/24 |
| 941.23 | 1 | 17/24 |
| 842.30 | 1 | 17/24 |
| 627.08 | 1 | 17/24 |
| #####  | 1 | 16/24 |
| #####  | 1 | 18/24 |
| #####  | 1 | 17/24 |
| #####  | 1 | 17/24 |
| 947.18 | 1 | 17/24 |
| #####  | 1 | 18/24 |
| #####  | 1 | 17/24 |
| #####  | 1 | 19/24 |
| #####  | 1 | 20/24 |
| #####  | 1 | 19/24 |
| #####  | 1 | 19/24 |
| 990.70 | 1 | 16/24 |
| #####  | 1 | 19/24 |
| #####  | 1 | 19/24 |
| #####  | 1 | 20/24 |
| 557.22 | 2 | 16/26 |
| 748.04 | 1 | 18/26 |

|        |   |       |
|--------|---|-------|
| 918.79 | 1 | 19/26 |
| 535.11 | 1 | 18/34 |
| #####  | 1 | 17/18 |
| #####  | 1 | 17/18 |
| 955.72 | 1 | 16/18 |
| 975.62 | 1 | 17/18 |
| #####  | 1 | 17/18 |
| 706.27 | 1 | 21/30 |
| 605.40 | 2 | 20/30 |
| 595.80 | 2 | 19/30 |
| 780.78 | 1 | 22/30 |
| 983.22 | 1 | 24/30 |
| #####  | 1 | 24/30 |
| #####  | 1 | 25/30 |
| 661.26 | 1 | 17/22 |
| 637.49 | 1 | 18/22 |
| 981.02 | 1 | 16/18 |
| 829.00 | 2 | 15/18 |
| 917.00 | 1 | 16/18 |
| #####  | 1 | 17/18 |
| 955.98 | 1 | 18/20 |
| 670.09 | 1 | 17/24 |
| 846.83 | 1 | 20/24 |
| 887.21 | 1 | 17/26 |
| #####  | 1 | 19/26 |
| 605.08 | 2 | 13/18 |
| 879.98 | 1 | 15/18 |
| 775.24 | 1 | 14/18 |
| 809.92 | 1 | 15/18 |
| 476.22 | 3 | 19/36 |
| #####  | 1 | 23/36 |
| #####  | 1 | 20/36 |
| #####  | 1 | 16/18 |
| 861.54 | 1 | 15/18 |
| #####  | 1 | 16/18 |
| 471.57 | 1 | 21/30 |
| 507.07 | 1 | 21/30 |
| 362.96 | 1 | 19/30 |
| 408.38 | 2 | 14/24 |
| 606.53 | 1 | 16/24 |
| 544.03 | 2 | 16/24 |
| 440.65 | 1 | 15/24 |
| 913.37 | 1 | 18/26 |
| 879.73 | 1 | 17/26 |
| 862.27 | 1 | 18/26 |
| #####  | 1 | 30/56 |
| #####  | 4 | 27/56 |
| #####  | 1 | 24/28 |
| #####  | 1 | 22/28 |
| #####  | 1 | 25/28 |
| 720.06 | 2 | 16/18 |
| #####  | 1 | 17/18 |
| #####  | 1 | 17/18 |
| #####  | 1 | 17/18 |
| #####  | 1 | 17/18 |
| 746.05 | 1 | 19/34 |

|        |   |       |
|--------|---|-------|
| 838.90 | 1 | 19/34 |
| #####  | 1 | 24/34 |
| #####  | 1 | 22/34 |
| 204.52 | 2 | 17/32 |
| 343.99 | 1 | 20/32 |
| 373.46 | 1 | 22/32 |
| 501.67 | 1 | 24/32 |
| 478.48 | 1 | 23/32 |
| 499.04 | 1 | 25/32 |
| 651.49 | 1 | 25/32 |
| 467.21 | 1 | 23/32 |
| 431.98 | 1 | 23/32 |
| 497.01 | 1 | 24/32 |
| 435.65 | 1 | 24/32 |
| 845.37 | 1 | 16/24 |
| 899.44 | 1 | 17/24 |
| #####  | 1 | 18/24 |
| #####  | 1 | 18/24 |
| #####  | 1 | 18/24 |
| 906.54 | 1 | 15/18 |
| 827.99 | 2 | 14/18 |
| 682.75 | 1 | 15/18 |
| 864.14 | 1 | 15/18 |
| 848.95 | 3 | 14/18 |
| #####  | 1 | 15/18 |
| 925.60 | 1 | 15/18 |
| 878.10 | 1 | 18/26 |
| 813.48 | 1 | 18/26 |
| 914.81 | 1 | 17/22 |
| #####  | 1 | 19/22 |
| 804.95 | 1 | 17/22 |
| #####  | 1 | 18/22 |
| #####  | 1 | 18/22 |
| #####  | 1 | 18/22 |
| #####  | 1 | 18/22 |
| 492.48 | 1 | 26/52 |
| 211.77 | 1 | 24/48 |
| 329.08 | 1 | 27/48 |
| 353.71 | 1 | 30/48 |
| 307.42 | 1 | 28/48 |
| #####  | 1 | 37/96 |
| #####  | 1 | 18/22 |
| 340.51 | 1 | 19/40 |
| 692.92 | 1 | 24/40 |
| 712.08 | 1 | 22/40 |
| 451.48 | 1 | 22/40 |
| 900.40 | 1 | 25/40 |
| 479.48 | 4 | 15/26 |
| #####  | 1 | 21/26 |
| #####  | 1 | 20/26 |
| #####  | 1 | 20/26 |
| #####  | 1 | 21/26 |
| 607.66 | 1 | 20/32 |
| #####  | 1 | 22/32 |
| #####  | 1 | 23/32 |
| #####  | 1 | 24/32 |
| #####  | 1 | 26/32 |

|        |   |       |
|--------|---|-------|
| #####  | 1 | 18/22 |
| 607.32 | 1 | 16/22 |
| 722.65 | 1 | 18/22 |
| 881.98 | 1 | 18/22 |
| #####  | 1 | 18/22 |
| #####  | 1 | 18/22 |
| 512.53 | 1 | 18/26 |
| 946.52 | 1 | 20/26 |
| 826.08 | 1 | 16/22 |
| #####  | 1 | 20/22 |
| #####  | 1 | 17/22 |
| 515.55 | 4 | 14/18 |
| 965.57 | 1 | 18/26 |
| #####  | 1 | 19/26 |
| #####  | 1 | 20/26 |
| #####  | 1 | 21/26 |
| #####  | 1 | 20/26 |
| #####  | 1 | 21/26 |
| #####  | 1 | 21/26 |
| 866.74 | 1 | 16/18 |
| #####  | 1 | 16/18 |
| 445.42 | 4 | 14/22 |
| 679.36 | 1 | 16/22 |
| 672.56 | 1 | 16/22 |
| 664.59 | 1 | 17/22 |
| 918.77 | 1 | 17/22 |
| #####  | 2 | 19/28 |
| #####  | 1 | 23/28 |
| #####  | 1 | 23/28 |
| #####  | 1 | 23/28 |
| #####  | 1 | 23/28 |
| #####  | 1 | 16/20 |
| #####  | 1 | 17/20 |
| #####  | 1 | 18/20 |
| 868.46 | 1 | 18/22 |
| #####  | 1 | 19/22 |
| #####  | 1 | 18/22 |
| #####  | 1 | 19/22 |
| 859.77 | 1 | 17/22 |
| 847.63 | 1 | 18/26 |
| #####  | 1 | 22/26 |
| 355.45 | 2 | 15/26 |
| 815.65 | 1 | 18/26 |
| #####  | 1 | 19/26 |
| #####  | 1 | 19/26 |
| #####  | 1 | 19/26 |
| #####  | 1 | 20/26 |
| 965.43 | 1 | 19/26 |
| #####  | 1 | 20/26 |
| #####  | 1 | 21/26 |
| #####  | 1 | 19/26 |
| 611.65 | 1 | 17/28 |
| #####  | 1 | 22/28 |
| #####  | 1 | 17/18 |
| 902.21 | 1 | 17/20 |
| 631.19 | 1 | 16/20 |

|        |   |       |
|--------|---|-------|
| 451.90 | 3 | 44166 |
| 705.81 | 1 | 16/20 |
| 544.91 | 2 | 13/20 |
| 604.89 | 3 | 13/20 |
| 754.61 | 1 | 15/20 |
| 800.79 | 1 | 16/22 |
| 992.96 | 1 | 16/22 |
| #####  | 1 | 19/22 |
| 602.72 | 1 | 19/30 |
| #####  | 1 | 21/30 |
| #####  | 1 | 22/30 |
| #####  | 1 | 20/30 |
| #####  | 1 | 23/30 |
| #####  | 1 | 22/30 |
| 963.37 | 1 | 22/30 |
| 931.00 | 1 | 21/30 |
| 962.51 | 1 | 22/30 |
| 940.74 | 1 | 23/30 |
| #####  | 1 | 24/30 |
| #####  | 1 | 22/30 |
| #####  | 1 | 24/30 |
| #####  | 1 | 18/22 |
| 981.66 | 1 | 16/22 |
| #####  | 1 | 18/22 |
| #####  | 1 | 16/22 |
| 951.42 | 1 | 17/22 |
| 902.69 | 1 | 15/20 |
| #####  | 1 | 16/20 |
| #####  | 1 | 17/20 |
| 654.76 | 1 | 16/20 |
| 549.65 | 2 | 15/20 |
| 789.65 | 1 | 17/20 |
| 776.36 | 3 | 13/18 |
| 722.83 | 1 | 13/18 |
| 717.65 | 1 | 13/18 |
| 706.28 | 1 | 13/18 |
| 733.67 | 1 | 13/18 |
| 590.60 | 1 | 16/20 |
| 925.27 | 1 | 16/20 |
| 683.10 | 1 | 17/20 |
| 758.20 | 1 | 16/20 |
| 657.55 | 1 | 16/20 |
| 748.89 | 1 | 17/20 |
| #####  | 1 | 18/20 |
| #####  | 1 | 18/20 |
| 775.74 | 1 | 16/20 |
| 796.76 | 1 | 16/20 |
| 770.65 | 1 | 15/20 |
| 722.88 | 3 | 15/20 |
| 677.06 | 2 | 15/20 |
| #####  | 1 | 45/92 |
| #####  | 1 | 23/34 |
| #####  | 1 | 20/26 |
| #####  | 1 | 22/26 |
| #####  | 1 | 22/26 |
| #####  | 1 | 22/26 |

##### 1 22/26  
##### 1 22/26  
757.61 1 17/28  
693.10 1 19/32  
978.51 1 19/32  
##### 1 22/32  
##### 1 22/32  
##### 1 22/32  
##### 1 23/32  
##### 1 21/32  
##### 1 25/32  
##### 1 26/32  
##### 1 21/26  
##### 1 22/26  
##### 1 23/26  
##### 1 22/26  
##### 1 23/26  
##### 1 22/26  
##### 1 22/26  
##### 1 21/26  
494.32 1 17/34  
713.80 1 21/34  
516.16 1 17/34  
709.06 1 21/34  
641.98 1 20/34  
710.41 1 21/34  
686.79 1 20/26  
788.06 1 19/26  
##### 1 22/30  
##### 1 22/30  
##### 1 21/30  
##### 1 20/30  
##### 1 17/20  
##### 1 16/20  
##### 1 17/20  
##### 1 17/20  
682.18 1 13/18  
769.91 1 14/18  
896.58 1 15/18  
867.76 1 15/18  
734.46 1 14/18  
878.31 1 15/18  
648.47 1 16/26  
##### 1 21/26  
##### 1 20/26  
##### 1 21/26  
##### 1 21/26  
##### 1 22/26  
##### 1 20/26  
##### 1 20/26  
##### 1 20/26  
##### 1 21/26  
##### 1 20/26  
##### 1 21/26  
##### 1 21/26  
##### 1 21/26  
##### 1 21/26  
##### 1 22/26

|        |   |       |
|--------|---|-------|
| 846.75 | 1 | 20/30 |
| 922.62 | 1 | 19/30 |
| #####  | 1 | 23/30 |
| #####  | 1 | 22/30 |
| #####  | 1 | 23/30 |
| #####  | 1 | 21/30 |
| #####  | 1 | 23/30 |
| #####  | 1 | 21/30 |
| #####  | 1 | 24/30 |
| #####  | 1 | 23/30 |
| #####  | 1 | 24/30 |
| #####  | 1 | 23/30 |
| #####  | 1 | 24/30 |
| #####  | 1 | 25/30 |
| #####  | 1 | 25/30 |
| #####  | 1 | 26/30 |
| #####  | 1 | 24/30 |
| #####  | 1 | 24/30 |
| #####  | 1 | 25/30 |
| #####  | 1 | 24/30 |
| #####  | 1 | 25/30 |
| #####  | 1 | 25/30 |
| #####  | 1 | 24/30 |
| #####  | 1 | 25/30 |
| #####  | 1 | 25/30 |
| #####  | 1 | 25/30 |
| #####  | 1 | 25/30 |
| 737.32 | 1 | 19/28 |
| 993.19 | 1 | 20/28 |
| #####  | 1 | 21/28 |
| 470.36 | 2 | 16/26 |
| #####  | 1 | 20/26 |
| #####  | 1 | 19/26 |
| 588.11 | 1 | 17/24 |
| 471.67 | 2 | 17/24 |
| 650.41 | 1 | 19/24 |
| #####  | 1 | 19/24 |
| #####  | 1 | 19/24 |
| #####  | 1 | 18/24 |
| #####  | 1 | 19/24 |
| 360.55 | 4 | 17/28 |
| 956.91 | 1 | 19/30 |
| 873.23 | 1 | 19/30 |
| 653.46 | 1 | 16/30 |
| 702.81 | 2 | 19/30 |
| 621.13 | 2 | 16/30 |
| #####  | 1 | 24/30 |
| #####  | 1 | 22/30 |
| #####  | 1 | 24/30 |
| #####  | 1 | 24/30 |
| 874.42 | 1 | 16/22 |
| #####  | 3 | 17/22 |
| 834.75 | 1 | 17/26 |
| 802.87 | 2 | 16/26 |
| #####  | 3 | 18/26 |
| #####  | 1 | 18/26 |



|        |   |       |
|--------|---|-------|
| #####  | 3 | 18/26 |
| 507.18 | 1 | 16/24 |
| 634.78 | 1 | 17/24 |
| 784.62 | 1 | 18/24 |
| 884.75 | 1 | 18/24 |
| 865.37 | 1 | 18/24 |
| 410.82 | 1 | 20/38 |
| 793.38 | 1 | 21/38 |
| 733.52 | 1 | 21/38 |
| 854.53 | 1 | 21/38 |
| 746.35 | 1 | 20/38 |
| 991.13 | 1 | 20/38 |
| 648.82 | 1 | 20/38 |
| #####  | 1 | 23/38 |
| 730.28 | 1 | 20/38 |
| #####  | 1 | 25/38 |
| 978.31 | 1 | 23/38 |
| 974.93 | 1 | 23/38 |
| #####  | 1 | 25/38 |
| #####  | 1 | 26/38 |
| #####  | 1 | 27/38 |
| #####  | 1 | 28/38 |
| #####  | 1 | 27/38 |
| #####  | 1 | 27/38 |
| #####  | 1 | 26/38 |
| #####  | 1 | 27/38 |
| #####  | 1 | 26/38 |
| #####  | 1 | 27/38 |
| #####  | 1 | 26/38 |
| #####  | 1 | 26/38 |
| #####  | 1 | 18/26 |
| 934.98 | 1 | 16/26 |
| #####  | 1 | 18/26 |
| 922.43 | 1 | 18/24 |
| 803.91 | 2 | 16/24 |
| #####  | 1 | 18/24 |
| #####  | 1 | 18/22 |
| 408.31 | 1 | 14/20 |
| 697.16 | 1 | 19/32 |
| 785.57 | 1 | 21/32 |
| 722.98 | 1 | 14/20 |
| 662.77 | 1 | 15/20 |
| 668.16 | 1 | 15/20 |
| #####  | 1 | 17/20 |
| #####  | 1 | 18/20 |
| #####  | 1 | 18/20 |
| #####  | 1 | 18/20 |
| 841.32 | 3 | 16/24 |
| #####  | 1 | 17/24 |
| 755.21 | 2 | 16/24 |
| #####  | 1 | 17/24 |
| #####  | 1 | 17/24 |
| #####  | 1 | 18/24 |
| #####  | 1 | 19/30 |
| #####  | 1 | 19/30 |
| #####  | 1 | 20/24 |
| #####  | 1 | 20/24 |
| #####  | 1 | 20/24 |
| #####  | 1 | 20/24 |

##### 1 20/24  
##### 1 20/24  
##### 1 20/24  
##### 1 20/24  
##### 1 20/24  
##### 1 19/24  
930.98 1 17/20  
##### 1 17/20  
##### 1 17/20  
##### 1 18/20  
##### 1 17/20  
##### 1 41/76  
##### 1 23/28  
##### 1 21/28  
##### 1 23/28  
847.20 1 16/24  
998.11 1 18/24  
##### 1 18/24  
918.75 1 16/20  
##### 1 17/20  
650.60 1 15/22  
##### 1 17/22  
642.83 1 15/22  
##### 1 18/22  
##### 1 18/22  
##### 1 19/22  
##### 1 17/22  
##### 1 23/32  
690.74 1 18/32  
##### 1 24/32  
##### 2 19/24  
##### 2 20/24  
##### 1 20/24  
##### 1 18/24  
##### 1 18/24  
##### 1 19/24  
##### 1 20/24  
##### 1 21/24  
##### 1 20/24  
##### 1 20/24  
##### 1 21/24  
##### 1 20/24  
987.82 1 19/24  
##### 1 20/24  
##### 1 18/24  
##### 1 18/24  
##### 1 20/24  
##### 1 20/24  
790.09 1 24/34  
630.12 1 20/34  
900.52 1 25/34  
905.08 1 25/34  
##### 1 32/68  
768.55 1 23/34  
899.65 1 23/34  
763.36 1 23/34

|        |   |       |
|--------|---|-------|
| 853.76 | 1 | 24/34 |
| 829.36 | 1 | 24/34 |
| 689.15 | 1 | 22/34 |
| 586.89 | 1 | 21/34 |
| 915.57 | 1 | 25/34 |
| #####  | 1 | 35/68 |
| 753.72 | 1 | 28/60 |
| 652.93 | 1 | 19/30 |
| 913.82 | 1 | 22/30 |
| #####  | 1 | 22/30 |
| #####  | 1 | 20/30 |
| #####  | 1 | 24/30 |
| 529.98 | 3 | 15/20 |
| 703.34 | 1 | 15/20 |
| 882.55 | 1 | 16/20 |
| 668.70 | 1 | 14/20 |
| #####  | 1 | 22/32 |
| #####  | 1 | 23/32 |
| 576.85 | 1 | 17/22 |
| 776.05 | 2 | 17/22 |
| 642.33 | 1 | 17/22 |
| 687.96 | 1 | 17/22 |
| 735.89 | 1 | 17/22 |
| 966.69 | 1 | 17/20 |
| 715.31 | 1 | 15/20 |
| #####  | 1 | 17/20 |
| #####  | 1 | 18/22 |
| #####  | 1 | 18/22 |
| #####  | 1 | 19/22 |
| #####  | 1 | 19/22 |
| #####  | 1 | 18/22 |
| #####  | 1 | 18/22 |
| #####  | 1 | 18/22 |
| #####  | 1 | 19/22 |
| #####  | 1 | 25/36 |
| #####  | 1 | 22/36 |
| 551.29 | 1 | 15/30 |
| 423.50 | 3 | 16/30 |
| #####  | 1 | 22/30 |
| #####  | 1 | 22/30 |
| #####  | 1 | 22/30 |
| #####  | 1 | 21/30 |
| #####  | 1 | 22/30 |
| 660.90 | 2 | 16/20 |
| 663.52 | 1 | 17/20 |
| 959.75 | 1 | 18/20 |
| 847.52 | 1 | 17/20 |
| 808.85 | 1 | 18/20 |
| #####  | 1 | 18/20 |
| #####  | 1 | 18/20 |
| 592.57 | 1 | 16/26 |
| 709.83 | 1 | 17/26 |
| #####  | 1 | 19/26 |
| 884.16 | 2 | 19/26 |
| #####  | 1 | 22/26 |
| 876.01 | 1 | 17/24 |

|        |   |       |
|--------|---|-------|
| 963.78 | 1 | 17/24 |
| 957.97 | 1 | 17/24 |
| #####  | 1 | 19/24 |
| 988.51 | 1 | 18/24 |
| #####  | 1 | 19/24 |
| #####  | 1 | 18/24 |
| #####  | 1 | 21/28 |
| #####  | 1 | 19/30 |
| 599.59 | 1 | 27/40 |
| 389.10 | 1 | 21/40 |
| 464.16 | 1 | 24/40 |
| 761.41 | 1 | 17/20 |
| #####  | 1 | 19/20 |
| #####  | 1 | 19/20 |
| #####  | 1 | 19/20 |
| 381.23 | 1 | 20/36 |
| 400.96 | 1 | 20/36 |
| #####  | 1 | 19/28 |
| 843.09 | 1 | 13/14 |
| 796.05 | 2 | 13/14 |
| 814.35 | 2 | 13/14 |
| 755.28 | 1 | 13/14 |
| #####  | 2 | 20/30 |
| #####  | 1 | 18/30 |
| 498.51 | 4 | 16/22 |
| 470.61 | 3 | 17/22 |
| 742.34 | 1 | 17/22 |
| 567.89 | 1 | 17/22 |
| 631.63 | 1 | 17/22 |
| 569.30 | 1 | 16/22 |
| 719.78 | 1 | 17/22 |
| 655.88 | 2 | 17/22 |
| 703.58 | 2 | 17/22 |
| #####  | 1 | 20/24 |
| 585.96 | 1 | 19/34 |
| 575.34 | 1 | 19/34 |
| 653.45 | 1 | 21/34 |
| 623.64 | 1 | 20/34 |
| 594.86 | 1 | 20/34 |
| 686.11 | 1 | 22/34 |
| #####  | 1 | 26/34 |
| 713.95 | 1 | 21/34 |
| 775.09 | 1 | 23/34 |
| 499.82 | 1 | 18/34 |
| 806.50 | 1 | 23/34 |
| 616.45 | 1 | 21/34 |
| 587.16 | 1 | 19/34 |
| 439.81 | 1 | 18/34 |
| 685.33 | 1 | 21/34 |
| 590.70 | 1 | 20/34 |
| 876.14 | 1 | 24/34 |
| 707.76 | 1 | 22/34 |
| 491.41 | 1 | 19/34 |
| 572.46 | 1 | 20/34 |
| 909.33 | 1 | 24/34 |
| 713.57 | 1 | 22/34 |

740.94 1 22/34  
789.91 1 22/34  
873.75 1 23/34  
751.29 1 22/34  
##### 1 17/28  
877.88 1 17/28  
##### 1 20/28  
##### 1 20/30  
##### 1 24/30  
996.67 1 31/72  
##### 1 34/72  
##### 1 22/26  
##### 1 22/26  
##### 1 23/26  
##### 1 22/26  
##### 1 22/26  
##### 1 22/26  
##### 1 21/26  
688.82 2 16/26  
860.40 2 17/26  
##### 1 19/26  
946.29 1 18/26  
##### 1 18/26  
##### 1 21/26  
##### 1 22/26  
##### 1 21/26  
997.06 1 17/20  
727.16 1 16/20  
730.66 2 15/20  
##### 1 15/20  
771.88 2 18/32  
848.39 2 18/32  
753.64 2 17/32  
873.83 2 19/32  
812.74 3 18/32  
815.54 2 18/32  
654.61 2 18/26  
##### 1 21/26  
##### 1 23/26  
##### 1 24/26  
##### 1 24/26  
810.44 1 16/30  
##### 1 19/30  
##### 1 21/30  
##### 1 20/30  
##### 1 21/30  
##### 1 21/30  
##### 1 22/30  
##### 1 20/30  
##### 1 23/30  
##### 1 23/30  
##### 1 25/30  
##### 1 19/28  
##### 1 20/28  
##### 1 18/24  
##### 1 21/24

|        |   |       |
|--------|---|-------|
| #####  | 1 | 21/24 |
| 678.25 | 1 | 18/24 |
| 629.72 | 1 | 19/24 |
| #####  | 1 | 21/24 |
| #####  | 1 | 22/24 |
| #####  | 1 | 21/24 |
| #####  | 1 | 21/24 |
| #####  | 1 | 22/24 |
| #####  | 1 | 22/24 |
| 699.97 | 1 | 18/24 |
| 689.68 | 1 | 17/24 |
| 673.81 | 2 | 18/24 |
| 535.03 | 1 | 16/24 |
| 642.11 | 1 | 17/24 |
| 655.07 | 4 | 16/24 |
| #####  | 1 | 18/24 |
| 969.51 | 1 | 19/24 |
| 692.65 | 1 | 17/24 |
| 579.11 | 3 | 15/24 |
| 653.10 | 1 | 18/24 |
| 929.13 | 1 | 19/24 |
| 975.41 | 1 | 18/24 |
| 447.72 | 1 | 17/24 |
| #####  | 1 | 19/24 |
| #####  | 1 | 20/24 |
| 520.49 | 1 | 16/24 |
| #####  | 1 | 20/24 |
| 605.08 | 4 | 16/24 |
| 735.99 | 1 | 18/24 |
| 896.20 | 1 | 19/24 |
| #####  | 1 | 18/24 |
| 911.68 | 1 | 18/24 |
| 540.88 | 3 | 17/24 |
| #####  | 1 | 19/24 |
| #####  | 1 | 20/24 |
| 881.52 | 1 | 18/24 |
| 652.39 | 1 | 17/24 |
| #####  | 1 | 21/24 |
| #####  | 1 | 19/24 |
| 948.87 | 1 | 19/24 |
| 797.68 | 2 | 16/24 |
| #####  | 1 | 19/24 |
| #####  | 2 | 18/24 |
| 814.74 | 1 | 20/24 |
| 942.87 | 3 | 18/24 |
| 920.05 | 1 | 18/24 |
| #####  | 1 | 20/24 |
| 845.26 | 1 | 18/24 |
| 994.15 | 1 | 18/24 |
| #####  | 1 | 19/24 |
| 878.42 | 1 | 19/24 |
| 474.75 | 2 | 15/24 |
| #####  | 1 | 21/24 |
| #####  | 1 | 20/24 |
| #####  | 1 | 19/24 |
| #####  | 1 | 20/24 |

##### 1 19/24  
##### 1 19/24  
##### 1 21/24  
872.33 1 18/24  
##### 1 19/24  
##### 1 20/24  
##### 1 19/24  
810.41 2 17/24  
##### 1 21/24  
##### 1 20/24  
##### 1 20/24  
##### 1 19/24  
##### 1 19/24  
##### 1 20/24  
##### 1 19/24  
##### 1 20/24  
##### 1 18/24  
##### 1 19/24  
##### 1 20/24  
##### 1 19/24  
##### 1 19/24  
##### 1 19/24  
##### 1 19/24  
##### 1 21/24  
##### 1 21/24  
##### 1 19/24  
##### 1 19/24  
##### 1 21/24  
##### 1 20/24  
916.10 1 18/24  
##### 1 19/24  
##### 1 21/24  
##### 1 19/24  
##### 1 20/24  
##### 1 20/24  
##### 1 19/24  
##### 1 20/24  
##### 1 20/24  
##### 1 20/24  
##### 1 20/24  
##### 1 21/24  
##### 1 20/24  
##### 1 19/24  
##### 1 19/24  
##### 1 19/24  
##### 1 20/24  
948.40 1 18/24  
##### 1 21/24  
##### 1 20/24  
##### 1 19/24  
##### 1 19/24  
##### 1 20/24  
##### 1 20/24  
##### 1 22/24

|        |   |       |
|--------|---|-------|
| #####  | 1 | 19/24 |
| #####  | 1 | 20/24 |
| #####  | 1 | 20/24 |
| #####  | 1 | 20/24 |
| #####  | 1 | 21/24 |
| #####  | 1 | 21/24 |
| #####  | 1 | 20/24 |
| #####  | 1 | 20/24 |
| #####  | 1 | 19/24 |
| #####  | 1 | 21/24 |
| #####  | 1 | 22/24 |
| #####  | 1 | 20/24 |
| #####  | 1 | 22/24 |
| #####  | 1 | 21/24 |
| #####  | 1 | 20/24 |
| #####  | 1 | 21/24 |
| #####  | 1 | 21/24 |
| #####  | 1 | 22/24 |
| #####  | 1 | 20/24 |
| #####  | 1 | 21/24 |
| #####  | 1 | 21/24 |
| #####  | 1 | 22/24 |
| #####  | 1 | 22/24 |
| #####  | 1 | 21/24 |
| 879.36 | 1 | 18/22 |
| 724.62 | 1 | 17/22 |
| 532.87 | 1 | 16/20 |
| 503.19 | 3 | 13/16 |
| 790.05 | 1 | 14/16 |
| 838.66 | 1 | 14/16 |
| 671.20 | 4 | 13/16 |
| 882.68 | 1 | 18/20 |
| 647.83 | 1 | 16/20 |
| 613.31 | 1 | 17/20 |
| #####  | 1 | 18/20 |
| #####  | 1 | 17/20 |
| #####  | 1 | 21/32 |
| 858.23 | 1 | 20/32 |
| #####  | 1 | 22/32 |
| 918.06 | 1 | 20/32 |
| 629.10 | 4 | 17/30 |
| 867.14 | 1 | 19/24 |
| 615.79 | 1 | 17/22 |
| #####  | 1 | 19/22 |
| #####  | 1 | 19/22 |
| #####  | 1 | 19/22 |
| #####  | 1 | 20/22 |
| 937.45 | 1 | 18/22 |
| #####  | 1 | 20/22 |
| #####  | 1 | 20/22 |
| #####  | 1 | 20/22 |
| 617.45 | 3 | 15/20 |
| 870.96 | 1 | 18/22 |
| 786.37 | 1 | 17/22 |
| 602.87 | 1 | 16/22 |



|        |   |       |
|--------|---|-------|
| 848.71 | 1 | 16/22 |
| 603.70 | 1 | 16/22 |
| 447.10 | 2 | 16/22 |
| 326.66 | 3 | 14/22 |
| 714.72 | 1 | 20/22 |
| 794.78 | 1 | 17/28 |
| 859.33 | 2 | 17/28 |
| 794.61 | 2 | 17/28 |
| 790.19 | 1 | 17/28 |
| 737.44 | 2 | 15/20 |
| 743.41 | 1 | 15/20 |
| 730.63 | 1 | 15/20 |
| 807.85 | 1 | 15/20 |
| #####  | 1 | 18/20 |
| #####  | 1 | 17/20 |
| 836.25 | 4 | 17/22 |
| #####  | 3 | 17/22 |
| 914.73 | 4 | 16/22 |
| #####  | 4 | 17/22 |
| #####  | 2 | 17/22 |
| #####  | 2 | 16/22 |
| #####  | 1 | 17/22 |
| 838.45 | 3 | 15/22 |
| 999.62 | 2 | 16/22 |
| #####  | 2 | 16/22 |
| #####  | 3 | 17/22 |
| #####  | 3 | 17/22 |
| #####  | 4 | 16/22 |
| #####  | 1 | 19/22 |
| #####  | 1 | 17/22 |
| #####  | 1 | 18/22 |
| #####  | 1 | 26/40 |
| 541.52 | 1 | 16/22 |
| 374.40 | 2 | 15/22 |
| 822.40 | 1 | 19/22 |
| 537.51 | 1 | 17/22 |
| 655.19 | 2 | 15/20 |
| 627.66 | 4 | 15/20 |
| 876.72 | 3 | 15/20 |
| #####  | 1 | 20/26 |
| #####  | 1 | 19/26 |
| #####  | 1 | 18/26 |
| #####  | 1 | 27/34 |
| #####  | 1 | 28/34 |
| 798.86 | 1 | 19/34 |
| 837.53 | 1 | 19/34 |
| 968.87 | 1 | 21/34 |
| #####  | 1 | 35/68 |
| 512.50 | 2 | 19/34 |
| 360.10 | 2 | 18/34 |
| 287.16 | 2 | 16/34 |
| 431.97 | 1 | 19/34 |
| 565.96 | 1 | 21/34 |
| 727.30 | 1 | 25/34 |
| 681.29 | 1 | 21/34 |
| 754.60 | 1 | 25/34 |

|        |   |       |
|--------|---|-------|
| 731.39 | 1 | 24/34 |
| 685.15 | 1 | 24/34 |
| 790.36 | 1 | 25/34 |
| 695.70 | 1 | 24/34 |
| 715.86 | 1 | 24/34 |
| 540.42 | 2 | 17/32 |
| 999.63 | 1 | 19/32 |
| 781.03 | 1 | 19/32 |
| #####  | 1 | 20/32 |
| #####  | 1 | 17/22 |
| #####  | 1 | 18/22 |
| 919.95 | 1 | 17/22 |
| #####  | 1 | 18/24 |
| #####  | 4 | 26/48 |
| #####  | 1 | 17/24 |
| #####  | 1 | 18/24 |
| #####  | 1 | 16/24 |
| 992.83 | 2 | 17/24 |
| 860.94 | 2 | 16/20 |
| #####  | 1 | 17/20 |
| #####  | 1 | 17/20 |
| #####  | 1 | 16/20 |
| #####  | 1 | 16/20 |
| 767.02 | 1 | 16/20 |
| 724.74 | 1 | 15/20 |
| 971.06 | 1 | 16/20 |
| #####  | 1 | 16/20 |
| 929.46 | 1 | 16/20 |
| #####  | 1 | 17/20 |
| #####  | 1 | 17/20 |
| 738.67 | 1 | 19/28 |
| 802.81 | 1 | 20/28 |
| 920.82 | 1 | 20/28 |
| 907.77 | 1 | 21/28 |
| 581.59 | 1 | 18/28 |
| #####  | 1 | 21/28 |
| 841.29 | 1 | 19/28 |
| 551.87 | 3 | 16/24 |
| 724.99 | 1 | 17/24 |
| 967.01 | 1 | 18/24 |
| 732.39 | 1 | 18/24 |
| 975.78 | 1 | 18/24 |
| #####  | 1 | 20/24 |
| #####  | 1 | 19/24 |
| #####  | 1 | 19/24 |
| #####  | 1 | 19/24 |
| 706.10 | 1 | 20/36 |
| 671.66 | 1 | 19/36 |
| 863.26 | 1 | 22/36 |
| 959.73 | 1 | 17/24 |
| 958.74 | 2 | 17/24 |
| 932.50 | 2 | 17/24 |
| #####  | 1 | 18/24 |
| 898.84 | 2 | 16/24 |
| 875.02 | 1 | 19/28 |
| 961.25 | 1 | 19/28 |

|        |   |       |
|--------|---|-------|
| 987.09 | 1 | 19/28 |
| 833.22 | 1 | 17/32 |
| 789.60 | 1 | 17/32 |
| #####  | 1 | 19/32 |
| #####  | 1 | 18/32 |
| #####  | 1 | 20/32 |
| 916.33 | 1 | 19/32 |
| #####  | 1 | 22/32 |
| #####  | 1 | 24/32 |
| #####  | 1 | 23/32 |
| #####  | 1 | 24/32 |
| 620.44 | 1 | 16/20 |
| 841.26 | 1 | 23/44 |
| 902.86 | 1 | 17/22 |
| #####  | 1 | 17/22 |
| #####  | 1 | 17/22 |
| 894.61 | 1 | 17/22 |
| 990.75 | 1 | 17/22 |
| 886.78 | 1 | 16/24 |
| 789.17 | 2 | 16/24 |
| 828.41 | 1 | 17/24 |
| 823.04 | 2 | 15/24 |
| 806.66 | 1 | 15/24 |
| 830.98 | 1 | 16/24 |
| 814.61 | 1 | 17/24 |
| #####  | 1 | 17/24 |
| #####  | 1 | 18/22 |
| 932.64 | 2 | 17/22 |
| #####  | 2 | 18/22 |
| #####  | 2 | 17/22 |
| #####  | 2 | 17/22 |
| 343.88 | 1 | 13/20 |
| 330.61 | 3 | 13/20 |
| 616.26 | 1 | 19/28 |
| 549.85 | 1 | 18/28 |
| 452.37 | 3 | 17/28 |
| 464.63 | 1 | 18/28 |
| 643.98 | 1 | 20/28 |
| 543.00 | 1 | 18/28 |
| 523.84 | 2 | 18/28 |
| 469.85 | 1 | 17/28 |
| 701.79 | 1 | 19/28 |
| 624.44 | 1 | 19/28 |
| 508.21 | 1 | 18/28 |
| 423.56 | 1 | 16/28 |
| 555.63 | 1 | 18/28 |
| 822.89 | 1 | 21/28 |
| 602.40 | 1 | 20/28 |
| 511.70 | 1 | 18/28 |
| 724.78 | 1 | 19/28 |
| 683.10 | 1 | 21/28 |
| 610.75 | 1 | 19/28 |
| 682.37 | 1 | 20/28 |
| 724.16 | 1 | 21/28 |
| 604.57 | 1 | 19/28 |
| 679.70 | 1 | 20/28 |

|        |   |       |
|--------|---|-------|
| 734.00 | 1 | 21/28 |
| 660.04 | 1 | 20/28 |
| 649.64 | 1 | 19/28 |
| 707.41 | 1 | 20/28 |
| 703.42 | 1 | 20/28 |
| #####  | 1 | 34/56 |
| 566.75 | 2 | 16/24 |
| #####  | 1 | 20/32 |
| #####  | 1 | 24/32 |
| 802.77 | 1 | 17/22 |
| #####  | 1 | 18/22 |
| 709.99 | 2 | 16/22 |
| 824.95 | 1 | 17/22 |
| 660.24 | 1 | 15/22 |
| 824.70 | 2 | 17/22 |
| 974.54 | 1 | 18/22 |
| #####  | 1 | 18/22 |
| #####  | 1 | 18/22 |
| 837.48 | 1 | 17/22 |
| #####  | 2 | 26/44 |
| 958.61 | 1 | 19/24 |
| #####  | 1 | 22/32 |
| 982.07 | 1 | 22/38 |
| 555.06 | 3 | 15/24 |
| #####  | 1 | 17/24 |
| #####  | 1 | 18/24 |
| #####  | 1 | 17/24 |
| #####  | 1 | 18/24 |
| #####  | 1 | 19/24 |
| #####  | 1 | 18/24 |
| 645.08 | 3 | 15/20 |
| 866.15 | 1 | 18/28 |
| 775.63 | 2 | 18/28 |
| #####  | 1 | 22/28 |
| #####  | 1 | 22/28 |
| 818.25 | 1 | 19/28 |
| #####  | 1 | 23/28 |
| #####  | 1 | 23/28 |
| #####  | 1 | 22/28 |
| #####  | 1 | 23/28 |
| #####  | 2 | 29/64 |
| 555.21 | 2 | 16/26 |
| 558.19 | 3 | 16/26 |
| 574.18 | 2 | 16/26 |
| 830.25 | 1 | 16/22 |
| #####  | 1 | 18/22 |
| 771.97 | 1 | 14/18 |
| #####  | 1 | 15/18 |
| #####  | 1 | 15/18 |
| #####  | 1 | 20/24 |
| 677.34 | 2 | 14/18 |
| 484.40 | 1 | 13/18 |
| 813.43 | 1 | 14/18 |
| 639.01 | 3 | 13/18 |
| 586.70 | 3 | 13/18 |
| 616.02 | 1 | 13/18 |

|        |   |       |
|--------|---|-------|
| 543.64 | 3 | 13/18 |
| 686.37 | 3 | 14/18 |
| 706.65 | 1 | 14/18 |
| 694.62 | 1 | 14/18 |
| 859.10 | 1 | 15/18 |
| 831.97 | 1 | 15/18 |
| 675.22 | 1 | 14/18 |
| 730.09 | 1 | 14/18 |
| 837.20 | 1 | 16/18 |
| 837.66 | 1 | 16/18 |
| 710.16 | 2 | 16/18 |
| 745.54 | 1 | 16/18 |
| 780.64 | 1 | 17/18 |
| 813.42 | 1 | 17/18 |
| 732.09 | 1 | 15/22 |
| #####  | 1 | 18/22 |
| #####  | 1 | 20/22 |
| #####  | 1 | 17/22 |
| #####  | 1 | 18/22 |
| #####  | 1 | 18/22 |
| 669.21 | 1 | 15/18 |
| #####  | 1 | 25/40 |
| #####  | 1 | 27/40 |
| #####  | 1 | 31/40 |
| 608.30 | 4 | 17/24 |
| 967.35 | 1 | 18/24 |
| 998.97 | 3 | 18/24 |
| 761.94 | 3 | 17/24 |
| 646.93 | 2 | 15/20 |
| 571.88 | 1 | 15/20 |
| 782.62 | 1 | 16/20 |
| 727.05 | 2 | 15/20 |
| 807.85 | 1 | 16/20 |
| 733.31 | 1 | 15/20 |
| 856.40 | 1 | 17/20 |
| #####  | 1 | 18/22 |
| #####  | 1 | 19/22 |
| #####  | 1 | 19/22 |
| #####  | 1 | 18/22 |
| 730.60 | 1 | 16/20 |
| #####  | 1 | 16/22 |
| 653.34 | 3 | 15/22 |
| 646.49 | 1 | 16/22 |
| 942.61 | 1 | 16/22 |
| 609.72 | 1 | 17/22 |
| 484.45 | 3 | 14/22 |
| 815.33 | 1 | 16/22 |
| 942.26 | 1 | 17/22 |
| #####  | 1 | 18/22 |
| 658.13 | 1 | 16/22 |
| 748.66 | 1 | 15/22 |
| 771.77 | 1 | 16/22 |
| 703.21 | 3 | 15/22 |
| 691.07 | 1 | 15/22 |
| 751.27 | 1 | 15/22 |
| #####  | 1 | 18/22 |

|        |   |       |
|--------|---|-------|
| 924.75 | 1 | 16/22 |
| 708.51 | 1 | 15/22 |
| 936.08 | 1 | 16/22 |
| 591.01 | 1 | 13/22 |
| #####  | 1 | 18/22 |
| 983.63 | 1 | 18/22 |
| #####  | 1 | 17/22 |
| #####  | 1 | 19/22 |
| 873.83 | 1 | 17/22 |
| 895.65 | 1 | 17/22 |
| 805.77 | 1 | 17/22 |
| #####  | 1 | 18/22 |
| 948.42 | 1 | 17/22 |
| #####  | 1 | 18/22 |
| 772.76 | 1 | 15/22 |
| 839.61 | 1 | 15/22 |
| #####  | 1 | 17/22 |
| #####  | 1 | 18/22 |
| #####  | 1 | 18/22 |
| #####  | 1 | 18/22 |
| #####  | 1 | 18/22 |
| 637.48 | 3 | 14/22 |
| #####  | 1 | 18/22 |
| 914.97 | 1 | 16/22 |
| #####  | 1 | 17/22 |
| #####  | 1 | 17/22 |
| 736.84 | 1 | 15/22 |
| #####  | 1 | 17/22 |
| 863.63 | 1 | 16/22 |
| #####  | 1 | 18/22 |
| #####  | 1 | 18/22 |
| #####  | 1 | 17/22 |
| #####  | 1 | 18/22 |
| #####  | 1 | 17/22 |
| #####  | 1 | 17/22 |
| #####  | 1 | 18/22 |
| #####  | 1 | 18/22 |
| #####  | 1 | 18/22 |
| #####  | 1 | 17/22 |
| #####  | 1 | 19/22 |
| #####  | 1 | 18/22 |
| #####  | 1 | 18/24 |
| #####  | 1 | 20/24 |
| 909.35 | 2 | 17/24 |
| #####  | 1 | 18/24 |
| 814.08 | 2 | 18/24 |
| 697.91 | 1 | 17/24 |
| 628.34 | 1 | 17/24 |
| 670.36 | 1 | 17/24 |
| 648.62 | 4 | 17/24 |
| 735.64 | 1 | 18/24 |
| 498.12 | 2 | 15/24 |
| 697.37 | 1 | 17/24 |
| 665.94 | 1 | 17/24 |
| 728.55 | 1 | 18/24 |

##### 1 17/18  
##### 1 17/18  
##### 1 17/18  
##### 1 17/18  
##### 1 17/18  
##### 1 17/18  
##### 1 16/18  
913.17 1 18/22  
566.53 1 17/22  
753.05 1 17/22  
543.71 1 16/22  
859.44 1 18/22  
##### 1 19/22  
##### 1 19/22  
##### 1 15/18  
369.06 3 16/20  
616.06 1 16/20  
##### 1 17/20  
685.69 1 19/30  
##### 1 22/30  
##### 1 23/30  
296.26 1 16/26  
394.54 2 17/26  
373.10 1 16/26  
520.91 1 16/24  
543.37 1 17/24  
713.05 1 19/24  
432.06 1 18/24  
722.22 2 19/24  
652.57 2 15/20  
704.77 1 14/20  
##### 1 19/22  
##### 1 15/22  
##### 1 18/22  
##### 1 17/22  
869.69 1 16/22  
##### 1 16/22  
##### 1 17/22  
##### 1 18/22  
##### 1 18/22  
##### 1 17/22  
##### 1 18/22  
##### 1 18/22  
##### 1 17/22  
##### 1 18/22  
##### 1 18/22  
956.19 1 16/22  
##### 1 18/22  
##### 1 18/22  
##### 1 18/22  
##### 1 18/22  
##### 1 19/22  
##### 1 18/22  
##### 1 18/22  
##### 1 18/22  
##### 1 19/22  
##### 1 18/22  
##### 1 18/22

|        |   |       |
|--------|---|-------|
| 765.05 | 1 | 18/22 |
| 606.41 | 1 | 18/22 |
| 906.52 | 1 | 19/22 |
| 815.37 | 1 | 19/22 |
| 863.38 | 1 | 19/22 |
| 314.80 | 2 | 15/22 |
| 335.34 | 2 | 15/22 |
| 419.38 | 1 | 16/22 |
| #####  | 1 | 21/24 |
| #####  | 1 | 20/24 |
| #####  | 1 | 21/24 |
| #####  | 1 | 21/24 |
| #####  | 1 | 21/24 |
| #####  | 1 | 21/24 |
| 676.45 | 1 | 14/20 |
| 783.03 | 4 | 15/20 |
| 664.27 | 2 | 15/20 |
| 625.17 | 2 | 14/20 |
| 941.42 | 1 | 16/20 |
| 838.28 | 1 | 17/22 |
| 523.78 | 1 | 15/22 |
| #####  | 1 | 17/22 |
| 618.40 | 1 | 16/22 |
| 593.72 | 1 | 16/22 |
| #####  | 1 | 17/22 |
| 496.82 | 1 | 15/22 |
| 668.38 | 1 | 14/22 |
| #####  | 2 | 17/22 |
| #####  | 1 | 17/22 |
| #####  | 1 | 18/22 |
| #####  | 1 | 18/22 |
| 913.85 | 1 | 18/22 |
| 568.88 | 3 | 15/22 |
| #####  | 1 | 17/22 |
| #####  | 1 | 17/22 |
| #####  | 1 | 17/22 |
| #####  | 1 | 18/22 |
| #####  | 1 | 18/22 |
| #####  | 1 | 18/22 |
| #####  | 1 | 18/22 |
| 844.37 | 1 | 16/22 |
| #####  | 1 | 19/22 |
| #####  | 1 | 19/22 |
| #####  | 1 | 19/22 |
| #####  | 1 | 18/22 |
| 699.64 | 1 | 19/26 |
| #####  | 1 | 21/26 |
| 912.82 | 1 | 21/26 |
| 981.28 | 1 | 21/26 |
| #####  | 1 | 22/26 |
| #####  | 1 | 22/26 |
| 939.81 | 1 | 21/26 |
| 579.69 | 1 | 15/22 |
| 585.46 | 1 | 15/22 |
| 633.33 | 2 | 15/22 |
| 719.63 | 2 | 15/22 |



|        |   |       |
|--------|---|-------|
| 806.46 | 1 | 16/22 |
| 721.76 | 1 | 16/22 |
| 712.03 | 1 | 15/22 |
| 699.46 | 1 | 15/22 |
| 914.66 | 1 | 17/22 |
| 721.75 | 1 | 15/22 |
| 886.23 | 1 | 17/22 |
| 638.66 | 3 | 14/20 |
| #####  | 1 | 16/20 |
| 785.09 | 1 | 16/20 |
| 910.60 | 1 | 16/20 |
| #####  | 1 | 17/24 |
| 977.53 | 1 | 17/24 |
| #####  | 1 | 19/24 |
| 673.98 | 1 | 18/20 |
| 614.62 | 1 | 17/26 |
| 630.05 | 1 | 16/26 |
| 401.25 | 3 | 16/26 |
| #####  | 1 | 21/26 |
| #####  | 1 | 22/26 |
| #####  | 1 | 21/26 |
| 854.68 | 2 | 17/26 |
| 858.93 | 1 | 17/26 |
| #####  | 1 | 18/26 |
| #####  | 1 | 20/26 |
| #####  | 1 | 19/22 |
| #####  | 1 | 18/22 |
| #####  | 1 | 18/22 |
| #####  | 1 | 19/22 |
| 434.83 | 3 | 16/28 |
| 643.05 | 1 | 19/28 |
| 645.88 | 1 | 19/28 |
| 616.55 | 1 | 17/32 |
| 589.99 | 3 | 16/32 |
| 719.54 | 2 | 19/32 |
| 685.42 | 1 | 15/18 |
| 967.55 | 1 | 15/18 |
| 768.25 | 2 | 15/18 |
| #####  | 1 | 15/18 |
| 963.44 | 1 | 15/18 |
| #####  | 1 | 15/18 |
| #####  | 1 | 23/36 |
| #####  | 1 | 26/36 |
| #####  | 1 | 28/36 |
| #####  | 1 | 28/36 |
| #####  | 1 | 28/36 |
| #####  | 1 | 27/36 |
| #####  | 1 | 28/36 |
| #####  | 1 | 28/36 |
| #####  | 1 | 28/36 |
| #####  | 1 | 28/36 |
| #####  | 1 | 22/28 |
| #####  | 1 | 21/28 |
| #####  | 1 | 23/28 |
| 950.62 | 2 | 18/28 |
| #####  | 1 | 21/28 |
| #####  | 1 | 21/28 |
| #####  | 1 | 23/28 |

|        |   |       |
|--------|---|-------|
| 685.04 | 2 | 14/18 |
| #####  | 1 | 16/18 |
| 890.65 | 1 | 15/18 |
| 901.56 | 2 | 18/22 |
| 886.88 | 1 | 16/18 |
| 603.32 | 1 | 14/18 |
| 674.62 | 2 | 15/18 |
| 683.35 | 2 | 15/18 |
| 924.93 | 2 | 17/18 |
| 543.61 | 2 | 14/18 |
| 924.43 | 1 | 17/18 |
| 830.50 | 1 | 16/18 |
| 798.15 | 1 | 16/18 |
| 805.63 | 1 | 16/18 |
| 919.29 | 1 | 17/18 |
| 927.46 | 1 | 17/18 |
| 469.85 | 1 | 21/28 |
| 853.92 | 1 | 22/28 |
| 613.02 | 2 | 17/26 |
| 613.13 | 3 | 19/26 |
| 998.94 | 1 | 21/26 |
| 962.84 | 1 | 20/26 |
| #####  | 1 | 22/26 |
| #####  | 1 | 22/26 |
| #####  | 1 | 19/26 |
| 475.99 | 4 | 14/28 |
| 714.55 | 2 | 19/28 |
| 895.57 | 1 | 20/28 |
| 846.92 | 1 | 19/28 |
| #####  | 1 | 22/28 |
| 846.58 | 1 | 20/28 |
| 769.00 | 1 | 18/28 |
| 998.95 | 1 | 21/28 |
| #####  | 1 | 22/28 |
| 972.90 | 1 | 21/28 |
| 660.47 | 1 | 17/28 |
| #####  | 1 | 22/28 |
| 598.71 | 3 | 16/28 |
| #####  | 1 | 21/28 |
| 974.77 | 1 | 21/28 |
| #####  | 1 | 21/28 |
| 960.37 | 1 | 20/28 |
| 652.11 | 1 | 17/28 |
| 717.15 | 1 | 17/28 |
| 623.05 | 1 | 17/34 |
| 861.97 | 1 | 19/34 |
| 650.92 | 1 | 18/34 |
| #####  | 1 | 20/34 |
| #####  | 1 | 22/34 |
| 720.95 | 2 | 17/22 |
| 806.07 | 2 | 18/22 |
| 783.42 | 2 | 17/22 |
| 858.64 | 2 | 14/18 |
| #####  | 1 | 16/18 |
| #####  | 1 | 15/18 |
| #####  | 1 | 17/20 |

|        |   |       |
|--------|---|-------|
| 913.99 | 1 | 15/20 |
| #####  | 1 | 18/20 |
| #####  | 1 | 16/20 |
| #####  | 1 | 16/20 |
| #####  | 1 | 16/20 |
| #####  | 2 | 16/20 |
| #####  | 1 | 17/20 |
| 993.88 | 2 | 16/20 |
| 594.90 | 1 | 20/34 |
| 894.63 | 1 | 18/34 |
| #####  | 1 | 23/34 |
| 697.58 | 2 | 17/28 |
| 742.42 | 1 | 17/28 |
| 898.19 | 2 | 19/28 |
| 814.01 | 2 | 17/28 |
| 978.43 | 2 | 18/28 |
| #####  | 1 | 19/28 |
| #####  | 1 | 19/28 |
| #####  | 1 | 22/28 |
| #####  | 1 | 19/28 |
| #####  | 1 | 21/28 |
| #####  | 1 | 21/28 |
| 559.74 | 3 | 16/28 |
| 700.18 | 3 | 17/28 |
| 615.09 | 1 | 16/28 |
| 719.01 | 1 | 17/28 |
| 741.23 | 1 | 18/28 |
| 715.99 | 2 | 17/28 |
| 688.63 | 2 | 17/28 |
| 718.80 | 1 | 17/28 |
| 647.15 | 2 | 16/24 |
| 977.17 | 1 | 19/24 |
| 701.65 | 1 | 16/24 |
| 936.42 | 1 | 18/20 |
| 569.20 | 3 | 16/20 |
| 459.51 | 1 | 15/20 |
| 686.81 | 1 | 16/20 |
| 819.92 | 1 | 17/20 |
| 765.40 | 1 | 17/20 |
| 871.55 | 2 | 15/22 |
| 744.09 | 1 | 19/32 |
| 498.50 | 4 | 19/32 |
| #####  | 1 | 38/88 |
| 649.77 | 1 | 17/24 |
| 661.95 | 1 | 17/24 |
| 309.92 | 2 | 16/24 |
| 350.12 | 2 | 16/24 |
| #####  | 1 | 19/24 |
| 930.51 | 1 | 18/24 |
| 829.61 | 1 | 18/24 |
| 723.61 | 1 | 17/24 |
| #####  | 1 | 20/32 |
| #####  | 1 | 20/32 |
| #####  | 1 | 24/32 |
| #####  | 1 | 21/32 |
| #####  | 1 | 24/32 |

|        |   |       |
|--------|---|-------|
| #####  | 1 | 23/32 |
| #####  | 1 | 22/32 |
| #####  | 1 | 24/32 |
| #####  | 1 | 23/32 |
| #####  | 1 | 25/32 |
| #####  | 1 | 24/32 |
| #####  | 1 | 24/32 |
| #####  | 1 | 24/32 |
| 648.76 | 2 | 20/36 |
| 579.59 | 1 | 18/36 |
| 600.50 | 1 | 20/36 |
| 940.99 | 1 | 24/36 |
| #####  | 1 | 25/36 |
| #####  | 1 | 24/36 |
| #####  | 1 | 26/36 |
| #####  | 1 | 23/36 |
| #####  | 1 | 26/36 |
| #####  | 1 | 25/36 |
| #####  | 1 | 27/36 |
| #####  | 1 | 30/44 |
| #####  | 1 | 33/44 |
| #####  | 1 | 30/44 |
| 639.26 | 3 | 16/22 |
| 570.58 | 2 | 16/22 |
| 904.43 | 1 | 16/22 |
| #####  | 1 | 17/22 |
| #####  | 1 | 17/22 |
| #####  | 1 | 17/22 |
| 758.95 | 1 | 17/24 |
| 719.71 | 2 | 17/24 |
| 850.09 | 1 | 15/22 |
| 872.51 | 1 | 16/22 |
| 928.96 | 1 | 17/22 |
| 590.89 | 1 | 15/18 |
| 516.15 | 1 | 15/18 |
| 698.99 | 1 | 14/18 |
| 798.51 | 1 | 16/18 |
| 620.11 | 1 | 16/18 |
| 726.45 | 1 | 16/18 |
| 787.09 | 1 | 16/18 |
| 746.37 | 1 | 16/18 |
| 679.23 | 1 | 16/18 |
| 761.70 | 1 | 16/18 |
| 714.49 | 1 | 16/18 |
| 670.47 | 1 | 16/18 |
| 886.29 | 1 | 17/18 |
| 747.35 | 1 | 15/18 |
| 716.98 | 1 | 16/18 |
| 737.21 | 1 | 16/18 |
| #####  | 1 | 33/60 |
| #####  | 2 | 31/60 |
| 694.75 | 1 | 16/22 |
| 572.73 | 1 | 16/22 |
| 579.97 | 1 | 15/22 |
| 667.30 | 1 | 17/22 |
| 663.05 | 1 | 14/16 |

|        |   |       |
|--------|---|-------|
| 558.13 | 1 | 14/16 |
| 589.19 | 1 | 14/16 |
| 831.02 | 1 | 13/16 |
| 698.54 | 1 | 13/16 |
| 524.20 | 1 | 42675 |
| 683.49 | 1 | 13/16 |
| 646.93 | 1 | 13/16 |
| 960.37 | 1 | 21/24 |
| 899.80 | 1 | 20/24 |
| 898.28 | 1 | 20/24 |
| 791.18 | 1 | 19/24 |
| 779.64 | 1 | 19/24 |
| #####  | 1 | 21/24 |
| #####  | 1 | 22/24 |
| #####  | 1 | 22/24 |
| 977.22 | 1 | 21/24 |
| 608.45 | 1 | 13/18 |
| 578.71 | 1 | 13/18 |
| 603.42 | 1 | 13/18 |
| 679.68 | 1 | 14/18 |
| 589.10 | 1 | 13/18 |
| 617.41 | 1 | 13/18 |
| 596.39 | 1 | 13/18 |
| #####  | 1 | 18/22 |
| 672.20 | 1 | 16/22 |
| 711.11 | 1 | 17/22 |
| 674.06 | 1 | 16/22 |
| #####  | 1 | 19/22 |
| 824.81 | 1 | 18/22 |
| 649.43 | 1 | 16/18 |
| 930.66 | 1 | 17/18 |
| 646.61 | 1 | 17/24 |
| 597.10 | 1 | 17/24 |
| 454.40 | 1 | 17/28 |
| 488.99 | 1 | 17/28 |
| 549.75 | 1 | 18/28 |
| 785.48 | 1 | 18/24 |
| 732.09 | 1 | 17/24 |
| 980.29 | 1 | 19/24 |
| 946.91 | 1 | 19/24 |
| 939.83 | 1 | 19/24 |
| 732.57 | 1 | 17/24 |
| 888.73 | 1 | 19/24 |
| 949.72 | 1 | 19/24 |
| 928.05 | 1 | 18/24 |
| 682.03 | 1 | 15/24 |
| #####  | 1 | 20/24 |
| #####  | 1 | 20/24 |
| 589.70 | 4 | 14/18 |
| 657.48 | 2 | 14/18 |
| 711.45 | 4 | 14/18 |
| 840.13 | 3 | 14/18 |
| #####  | 1 | 15/18 |
| 799.09 | 1 | 21/34 |
| 631.87 | 1 | 20/34 |
| 604.14 | 1 | 20/34 |

|        |   |       |
|--------|---|-------|
| 722.01 | 1 | 21/34 |
| 682.88 | 1 | 24/60 |
| #####  | 1 | 33/60 |
| #####  | 1 | 34/60 |
| #####  | 1 | 24/30 |
| 992.35 | 1 | 22/30 |
| #####  | 1 | 20/28 |
| #####  | 1 | 20/28 |
| #####  | 1 | 23/28 |
| #####  | 1 | 20/30 |
| #####  | 1 | 24/30 |
| #####  | 1 | 26/30 |
| #####  | 1 | 24/30 |
| #####  | 1 | 25/30 |
| #####  | 1 | 23/30 |
| #####  | 1 | 25/30 |
| #####  | 1 | 23/32 |
| 594.54 | 3 | 15/22 |
| 907.61 | 1 | 18/22 |
| #####  | 1 | 39/88 |
| #####  | 1 | 40/88 |
| #####  | 1 | 39/88 |
| #####  | 1 | 40/88 |
| 906.06 | 1 | 17/24 |
| #####  | 1 | 18/24 |
| 842.21 | 1 | 17/24 |
| 997.38 | 1 | 17/24 |
| #####  | 1 | 19/24 |
| 976.92 | 1 | 18/24 |
| 956.32 | 1 | 18/24 |
| #####  | 1 | 18/24 |
| #####  | 1 | 18/24 |
| 884.69 | 1 | 17/24 |
| 538.65 | 1 | 15/24 |
| 538.41 | 4 | 14/24 |
| 545.08 | 1 | 15/24 |
| 688.83 | 2 | 16/24 |
| 886.44 | 1 | 17/24 |
| 758.50 | 1 | 16/24 |
| 963.22 | 1 | 17/24 |
| 918.99 | 1 | 18/24 |
| 823.01 | 1 | 17/24 |
| 862.93 | 1 | 18/24 |
| 546.64 | 1 | 16/26 |
| 863.71 | 4 | 15/20 |
| 847.91 | 1 | 17/28 |
| #####  | 1 | 19/28 |
| #####  | 1 | 23/28 |
| #####  | 1 | 23/28 |
| #####  | 1 | 21/28 |
| #####  | 1 | 22/28 |
| #####  | 1 | 22/28 |
| 750.91 | 1 | 14/18 |
| #####  | 1 | 16/18 |
| 921.27 | 1 | 15/18 |
| 901.75 | 1 | 15/18 |

|        |   |       |
|--------|---|-------|
| 968.33 | 1 | 15/18 |
| 934.04 | 1 | 15/18 |
| #####  | 1 | 16/18 |
| 619.06 | 4 | 15/30 |
| 886.14 | 1 | 17/30 |
| #####  | 1 | 19/22 |
| #####  | 1 | 18/22 |
| #####  | 1 | 20/22 |
| 816.12 | 1 | 18/22 |
| 714.08 | 2 | 16/22 |
| 950.76 | 1 | 18/22 |
| 616.60 | 3 | 14/18 |
| 808.24 | 2 | 15/18 |
| 378.05 | 4 | 16/28 |
| 534.47 | 1 | 17/28 |
| 797.31 | 1 | 18/28 |
| #####  | 1 | 19/28 |
| 539.73 | 4 | 16/22 |
| 458.44 | 3 | 15/18 |
| 580.56 | 2 | 15/18 |
| 590.09 | 4 | 15/18 |
| 833.88 | 1 | 16/18 |
| 763.92 | 1 | 16/18 |
| 468.43 | 1 | 15/18 |
| 667.18 | 1 | 16/18 |
| 498.13 | 4 | 14/18 |
| 627.77 | 2 | 16/18 |
| 567.22 | 2 | 15/18 |
| 642.76 | 1 | 16/18 |
| 688.62 | 1 | 16/18 |
| 654.74 | 2 | 15/18 |
| 731.79 | 1 | 16/18 |
| 619.43 | 2 | 16/18 |
| 691.08 | 2 | 16/18 |
| 711.82 | 1 | 16/18 |
| 650.80 | 1 | 16/18 |
| #####  | 1 | 17/18 |
| 708.07 | 3 | 16/18 |
| 590.13 | 4 | 15/18 |
| 873.94 | 1 | 17/18 |
| 624.92 | 3 | 15/18 |
| 568.29 | 2 | 15/18 |
| #####  | 1 | 17/18 |
| 400.08 | 3 | 15/28 |
| #####  | 1 | 20/34 |
| #####  | 1 | 19/34 |
| 919.44 | 1 | 18/34 |
| 457.81 | 2 | 15/22 |
| #####  | 1 | 20/22 |
| #####  | 1 | 20/22 |
| #####  | 1 | 20/22 |
| #####  | 1 | 19/22 |
| #####  | 1 | 20/22 |
| #####  | 1 | 20/22 |
| #####  | 1 | 20/22 |
| 791.19 | 1 | 14/18 |

|        |   |       |
|--------|---|-------|
| #####  | 1 | 17/18 |
| 988.49 | 1 | 16/18 |
| #####  | 1 | 16/18 |
| 644.29 | 1 | 17/22 |
| 864.23 | 1 | 18/26 |
| 972.39 | 1 | 20/26 |
| #####  | 1 | 19/26 |
| #####  | 1 | 21/26 |
| 978.26 | 1 | 19/26 |
| 880.18 | 1 | 18/26 |
| 981.38 | 1 | 19/26 |
| #####  | 1 | 19/22 |
| #####  | 1 | 18/22 |
| #####  | 1 | 18/22 |
| #####  | 1 | 19/22 |
| #####  | 1 | 19/22 |
| #####  | 1 | 19/22 |
| 811.55 | 1 | 16/24 |
| #####  | 1 | 20/24 |
| 920.54 | 1 | 22/34 |
| #####  | 1 | 26/34 |
| #####  | 1 | 21/34 |
| 884.32 | 1 | 17/20 |
| 630.58 | 4 | 15/20 |
| 604.68 | 4 | 15/20 |
| 907.06 | 1 | 15/16 |
| 858.95 | 1 | 14/16 |
| 804.76 | 2 | 14/16 |
| 937.67 | 1 | 15/16 |
| 820.60 | 2 | 14/16 |
| 674.62 | 1 | 17/24 |
| 789.53 | 1 | 18/24 |
| 536.45 | 1 | 17/24 |
| 931.23 | 1 | 20/24 |
| 751.09 | 1 | 17/24 |
| 871.81 | 1 | 19/24 |
| 742.73 | 1 | 19/24 |
| 986.32 | 1 | 24/48 |
| #####  | 1 | 27/48 |
| #####  | 1 | 30/48 |
| 912.81 | 1 | 18/24 |
| 747.47 | 1 | 18/24 |
| 771.97 | 1 | 17/24 |
| 852.16 | 1 | 18/24 |
| #####  | 1 | 20/24 |
| 976.50 | 1 | 19/24 |
| 837.29 | 1 | 18/24 |
| 256.23 | 4 | 14/22 |
| 332.86 | 2 | 15/22 |
| 314.13 | 2 | 16/22 |
| 374.46 | 1 | 16/22 |
| 423.61 | 1 | 17/22 |
| 382.74 | 2 | 17/22 |
| #####  | 1 | 19/20 |
| #####  | 1 | 19/20 |
| #####  | 1 | 18/20 |



|        |   |       |
|--------|---|-------|
| #####  | 1 | 19/20 |
| 630.13 | 1 | 14/16 |
| 755.94 | 1 | 18/28 |
| #####  | 1 | 21/28 |
| 847.62 | 1 | 20/28 |
| #####  | 1 | 22/28 |
| 392.14 | 2 | 16/24 |
| 477.38 | 2 | 17/24 |
| 312.12 | 1 | 18/24 |
| 438.79 | 1 | 19/24 |
| 446.19 | 1 | 19/24 |
| 427.10 | 1 | 19/24 |
| #####  | 1 | 36/84 |
| #####  | 1 | 27/42 |
| #####  | 1 | 28/42 |
| #####  | 1 | 30/42 |
| #####  | 1 | 31/42 |
| #####  | 1 | 20/28 |
| #####  | 3 | 18/24 |
| #####  | 1 | 19/24 |
| #####  | 1 | 19/24 |
| #####  | 3 | 19/24 |
| 822.11 | 3 | 17/24 |
| 879.20 | 2 | 17/24 |
| #####  | 1 | 19/24 |
| #####  | 3 | 18/24 |
| 612.65 | 1 | 18/32 |
| 538.75 | 1 | 17/32 |
| 765.96 | 1 | 19/32 |
| 816.92 | 1 | 20/32 |
| 820.40 | 1 | 19/32 |
| 999.80 | 1 | 22/32 |
| 870.63 | 1 | 20/32 |
| 960.74 | 1 | 21/32 |
| 618.56 | 4 | 16/20 |
| 980.93 | 1 | 17/20 |
| #####  | 1 | 18/20 |
| #####  | 1 | 18/20 |
| #####  | 1 | 17/20 |
| #####  | 1 | 18/20 |
| 963.72 | 1 | 17/20 |
| 943.63 | 1 | 19/28 |
| 815.20 | 1 | 20/28 |
| 919.66 | 1 | 19/28 |
| #####  | 1 | 21/28 |
| #####  | 1 | 21/28 |
| #####  | 1 | 17/24 |
| #####  | 1 | 17/24 |
| #####  | 1 | 18/24 |
| #####  | 1 | 19/24 |
| #####  | 1 | 19/24 |
| #####  | 1 | 18/24 |
| 422.56 | 2 | 15/20 |
| 548.87 | 1 | 15/20 |
| 529.68 | 1 | 17/20 |
| 692.50 | 1 | 17/20 |

|        |   |       |
|--------|---|-------|
| 637.53 | 1 | 17/20 |
| 651.73 | 2 | 16/24 |
| 758.68 | 1 | 16/22 |
| 829.75 | 1 | 16/22 |
| #####  | 1 | 19/22 |
| 698.25 | 1 | 16/22 |
| 792.95 | 4 | 17/26 |
| #####  | 1 | 23/26 |
| 698.33 | 1 | 19/30 |
| 434.81 | 2 | 17/30 |
| 838.69 | 1 | 20/30 |
| #####  | 1 | 23/30 |
| 864.26 | 1 | 20/30 |
| #####  | 1 | 21/30 |
| #####  | 1 | 22/30 |
| #####  | 1 | 22/30 |
| #####  | 1 | 21/30 |
| #####  | 1 | 25/30 |
| 575.19 | 1 | 16/24 |
| 444.51 | 1 | 17/24 |
| 509.53 | 1 | 18/24 |
| 533.96 | 1 | 17/24 |
| 504.03 | 4 | 15/18 |
| 627.09 | 1 | 16/18 |
| 591.08 | 2 | 16/18 |
| #####  | 1 | 18/24 |
| 488.50 | 3 | 17/24 |
| 924.59 | 1 | 19/28 |
| #####  | 1 | 19/28 |
| 413.10 | 2 | 16/26 |
| 597.94 | 1 | 19/26 |
| 599.77 | 1 | 19/26 |
| 499.71 | 1 | 18/26 |
| 636.46 | 1 | 19/26 |
| #####  | 1 | 33/60 |
| 700.69 | 1 | 17/30 |
| #####  | 1 | 32/60 |
| #####  | 1 | 31/60 |
| #####  | 1 | 35/60 |
| #####  | 1 | 20/30 |
| #####  | 1 | 39/60 |
| 968.45 | 1 | 19/30 |
| 912.47 | 1 | 18/30 |
| 592.22 | 1 | 20/32 |
| 542.73 | 1 | 19/32 |
| #####  | 1 | 19/32 |
| #####  | 1 | 23/28 |
| #####  | 1 | 23/28 |
| #####  | 1 | 20/28 |
| #####  | 1 | 25/28 |
| 831.84 | 1 | 16/30 |
| #####  | 1 | 17/30 |
| 340.72 | 4 | 14/20 |
| 506.19 | 1 | 16/20 |
| 493.63 | 1 | 15/20 |
| 440.56 | 1 | 15/20 |

424.71 1 15/20  
603.16 1 16/20  
619.15 1 16/20  
638.74 1 16/20  
##### 1 32/68  
##### 1 36/68  
##### 1 35/68  
758.39 1 21/34  
##### 1 26/34  
##### 1 26/34  
##### 1 26/34  
##### 1 28/34  
506.72 4 15/20  
965.86 1 17/20  
952.31 1 17/20  
##### 1 18/20  
657.84 1 19/28  
719.48 1 19/28  
##### 1 23/28  
##### 1 24/28  
##### 1 24/28  
##### 1 25/28  
##### 1 24/28  
##### 1 25/28  
##### 1 25/28  
##### 1 19/22  
##### 1 20/22  
##### 1 19/22  
##### 1 18/22  
##### 1 20/22  
852.41 1 18/26  
##### 1 20/26  
##### 1 22/26  
##### 1 22/26  
892.83 3 18/24  
728.14 2 17/24  
##### 1 19/24  
##### 1 19/24  
##### 1 20/24  
##### 1 21/24  
##### 1 18/22  
##### 1 18/22  
##### 1 17/22  
##### 1 18/22  
393.66 4 15/28  
397.46 3 16/28  
525.62 1 17/28  
544.23 1 16/28  
449.41 2 15/28  
495.41 1 16/28  
##### 1 23/28  
##### 1 23/28  
##### 1 23/28  
##### 1 24/28  
##### 1 24/28  
##### 1 23/28

|        |   |       |
|--------|---|-------|
| #####  | 1 | 24/28 |
| 918.18 | 1 | 19/28 |
| 927.15 | 1 | 16/28 |
| #####  | 1 | 20/28 |
| #####  | 1 | 19/28 |
| #####  | 1 | 19/28 |
| #####  | 1 | 24/28 |
| #####  | 1 | 24/28 |
| #####  | 1 | 24/28 |
| #####  | 1 | 24/28 |
| #####  | 1 | 24/28 |
| #####  | 1 | 23/28 |
| #####  | 1 | 23/28 |
| #####  | 1 | 24/28 |
| #####  | 1 | 24/28 |
| #####  | 1 | 24/28 |
| #####  | 1 | 24/28 |
| #####  | 1 | 24/28 |
| 704.62 | 1 | 17/24 |
| 749.60 | 1 | 18/24 |
| 524.77 | 2 | 16/24 |
| 798.40 | 1 | 18/24 |
| 742.50 | 1 | 21/34 |
| #####  | 1 | 22/34 |
| #####  | 1 | 24/34 |
| #####  | 1 | 23/34 |
| #####  | 1 | 23/34 |
| 405.93 | 3 | 16/22 |
| 600.55 | 1 | 16/22 |
| 661.53 | 1 | 16/22 |
| 835.29 | 1 | 14/16 |
| #####  | 1 | 17/18 |
| 928.73 | 1 | 14/18 |
| 513.90 | 1 | 17/24 |
| 433.28 | 1 | 17/24 |
| 419.07 | 1 | 16/24 |
| #####  | 1 | 45/92 |
| #####  | 1 | 38/92 |
| 852.53 | 4 | 14/18 |
| 891.76 | 2 | 14/18 |
| 913.14 | 1 | 14/18 |
| 933.45 | 3 | 14/18 |
| 560.56 | 1 | 13/18 |
| 579.10 | 2 | 13/18 |
| 633.36 | 1 | 14/18 |
| 729.70 | 1 | 14/18 |
| 584.04 | 3 | 13/18 |
| 695.41 | 2 | 14/18 |
| 706.08 | 1 | 14/18 |
| 812.07 | 1 | 15/18 |
| #####  | 1 | 28/52 |
| 767.64 | 3 | 25/52 |
| #####  | 1 | 28/52 |
| #####  | 1 | 32/52 |
| 513.45 | 1 | 15/20 |
| #####  | 1 | 18/20 |
| 471.60 | 1 | 14/20 |

|        |   |       |
|--------|---|-------|
| 517.47 | 3 | 13/18 |
| 570.88 | 4 | 15/18 |
| 647.74 | 3 | 15/18 |
| #####  | 1 | 21/32 |
| 676.93 | 2 | 16/28 |
| 879.31 | 1 | 17/28 |
| #####  | 1 | 20/28 |
| 804.06 | 1 | 17/28 |
| #####  | 1 | 21/28 |
| #####  | 1 | 33/60 |
| #####  | 1 | 34/60 |
| 806.11 | 1 | 16/22 |
| 739.50 | 2 | 17/22 |
| 963.40 | 1 | 17/22 |
| #####  | 1 | 19/22 |
| #####  | 1 | 19/22 |
| #####  | 1 | 20/24 |
| #####  | 1 | 20/24 |
| #####  | 1 | 20/24 |
| 996.14 | 1 | 17/24 |
| #####  | 1 | 19/24 |
| 679.18 | 1 | 17/22 |
| #####  | 1 | 21/28 |
| #####  | 1 | 21/28 |
| #####  | 1 | 22/28 |
| #####  | 1 | 21/26 |
| #####  | 1 | 20/26 |
| #####  | 1 | 25/42 |
| #####  | 1 | 26/42 |
| #####  | 1 | 29/42 |
| #####  | 1 | 29/42 |
| 545.43 | 1 | 16/32 |
| #####  | 1 | 19/32 |
| #####  | 1 | 19/32 |
| #####  | 1 | 19/32 |
| #####  | 1 | 19/32 |
| #####  | 1 | 21/32 |
| #####  | 1 | 22/32 |
| #####  | 1 | 23/32 |
| #####  | 1 | 22/32 |
| #####  | 1 | 22/32 |
| #####  | 1 | 22/32 |
| #####  | 1 | 22/32 |
| #####  | 1 | 22/32 |
| #####  | 1 | 22/32 |
| #####  | 1 | 22/32 |
| #####  | 1 | 22/32 |
| 452.59 | 1 | 15/32 |
| 521.95 | 2 | 16/32 |
| 570.48 | 1 | 17/32 |
| 614.10 | 1 | 17/28 |
| 428.19 | 3 | 16/28 |
| 856.74 | 1 | 14/18 |
| 800.31 | 3 | 15/20 |
| 773.18 | 3 | 16/20 |
| 942.32 | 2 | 16/20 |
| 986.40 | 2 | 16/20 |
| 775.12 | 4 | 16/20 |

|        |   |       |
|--------|---|-------|
| 614.55 | 1 | 18/26 |
| 567.95 | 1 | 16/26 |
| 742.98 | 1 | 19/26 |
| 894.94 | 1 | 16/20 |
| 809.81 | 2 | 15/20 |
| 962.98 | 1 | 16/20 |
| 824.90 | 1 | 18/24 |
| 723.69 | 1 | 17/22 |
| #####  | 1 | 18/22 |
| #####  | 1 | 19/22 |
| 805.47 | 1 | 22/32 |
| 841.63 | 1 | 23/32 |
| 729.59 | 1 | 21/32 |
| 922.80 | 1 | 23/32 |
| 802.92 | 1 | 22/32 |
| 842.22 | 1 | 22/32 |
| 823.66 | 1 | 22/32 |
| 940.60 | 1 | 23/32 |
| 889.91 | 1 | 23/32 |
| 517.38 | 1 | 20/30 |
| 638.56 | 1 | 21/30 |
| 890.96 | 1 | 23/30 |
| 806.51 | 1 | 23/30 |
| 921.78 | 1 | 23/30 |
| #####  | 1 | 22/30 |
| #####  | 1 | 20/24 |
| #####  | 1 | 20/24 |
| #####  | 1 | 20/24 |
| 574.94 | 4 | 14/22 |
| 839.77 | 3 | 16/22 |
| 803.81 | 2 | 16/22 |
| 781.28 | 1 | 17/26 |
| #####  | 1 | 19/26 |
| 717.31 | 2 | 17/30 |
| 651.97 | 1 | 18/30 |
| #####  | 1 | 21/30 |
| 979.96 | 1 | 19/30 |
| 800.57 | 1 | 18/30 |
| 881.16 | 1 | 20/30 |
| 854.55 | 1 | 19/30 |
| 886.50 | 1 | 19/30 |
| #####  | 1 | 22/30 |
| 844.20 | 1 | 20/30 |
| #####  | 1 | 21/30 |
| #####  | 1 | 21/30 |
| #####  | 1 | 21/30 |
| #####  | 1 | 23/30 |
| 924.37 | 1 | 20/30 |
| #####  | 1 | 21/30 |
| 900.75 | 1 | 20/30 |
| #####  | 1 | 21/26 |
| #####  | 1 | 22/26 |
| #####  | 1 | 21/26 |
| #####  | 1 | 21/26 |
| #####  | 1 | 22/26 |
| #####  | 1 | 21/26 |
| #####  | 1 | 22/26 |

##### 1 21/26  
##### 1 22/26  
##### 1 21/26  
##### 1 21/30  
799.07 1 19/30  
##### 4 26/48  
##### 1 28/48  
##### 1 25/48  
819.22 2 15/18  
660.84 4 14/18  
964.56 1 16/18  
742.32 3 15/18  
690.04 4 14/18  
981.77 1 19/24  
##### 1 19/24  
572.92 2 16/26  
##### 1 21/26  
948.42 1 19/26  
841.19 1 19/26  
987.13 1 20/26  
623.22 1 17/24  
417.88 4 14/24  
813.25 1 19/24  
648.35 1 17/24  
736.28 1 19/24  
713.92 1 19/24  
690.24 1 18/24  
812.06 1 20/24  
486.46 2 16/24  
698.42 1 18/24  
820.35 1 20/24  
626.94 1 18/24  
723.47 1 18/24  
836.75 1 20/24  
767.25 1 19/24  
825.53 1 19/24  
926.13 2 17/28  
##### 1 20/28  
##### 1 20/28  
790.68 2 16/22  
##### 1 17/22  
##### 1 18/22  
##### 1 19/24  
##### 1 20/24  
##### 1 20/24  
##### 1 21/24  
##### 1 21/24  
##### 1 21/24  
##### 1 21/24  
##### 1 21/24  
##### 1 21/24  
##### 1 19/26  
##### 1 19/26  
759.37 1 20/38  
666.96 1 18/38  
546.74 1 18/38  
656.93 1 18/24

879.95 3 29/68  
##### 1 32/68  
##### 1 34/68  
876.28 2 30/68  
866.95 2 29/68  
870.87 3 29/68  
977.26 3 30/68  
782.97 3 29/68  
##### 1 33/68  
776.19 4 28/68  
921.28 2 29/68  
##### 1 32/68  
736.35 4 29/68  
##### 2 32/68  
##### 1 22/34  
##### 1 22/34  
##### 2 31/68  
748.25 4 29/68  
733.87 3 29/68  
796.35 1 29/68  
821.58 1 20/34  
923.49 1 21/34  
845.18 3 30/68  
946.45 1 21/34  
##### 1 32/68  
833.39 2 29/68  
766.70 1 20/34  
659.19 1 19/34  
983.38 1 21/34  
722.23 1 19/34  
864.57 1 20/34  
704.88 4 28/68  
##### 1 23/34  
##### 1 22/34  
##### 1 22/34  
##### 1 23/34  
##### 1 25/34  
##### 1 23/34  
##### 1 23/34  
860.40 1 21/34  
780.43 1 20/34  
977.18 1 22/34  
767.97 1 18/30  
823.53 1 18/30  
611.74 1 16/30  
774.02 1 18/30  
942.99 1 19/30  
988.16 1 20/30  
914.44 1 20/30  
##### 1 20/30  
##### 1 16/18  
##### 1 16/18  
##### 1 16/18  
##### 1 16/18  
##### 1 16/18  
##### 1 16/18



|        |   |       |
|--------|---|-------|
| 931.94 | 1 | 17/22 |
| #####  | 1 | 17/22 |
| #####  | 1 | 18/22 |
| 909.71 | 1 | 17/22 |
| #####  | 1 | 16/22 |
| #####  | 2 | 17/22 |
| #####  | 1 | 17/22 |
| #####  | 1 | 19/22 |
| #####  | 1 | 16/22 |
| 576.61 | 2 | 20/32 |
| 837.26 | 1 | 24/32 |
| 450.32 | 1 | 15/20 |
| #####  | 1 | 20/26 |
| #####  | 1 | 19/26 |
| #####  | 1 | 20/26 |
| #####  | 1 | 20/26 |
| 552.53 | 3 | 13/18 |
| #####  | 1 | 16/18 |
| #####  | 1 | 16/18 |
| #####  | 1 | 17/18 |
| 608.55 | 1 | 16/24 |
| 624.91 | 1 | 18/24 |
| 493.35 | 4 | 17/24 |
| 636.94 | 2 | 17/24 |
| 641.33 | 1 | 16/24 |
| 879.04 | 1 | 17/24 |
| 833.93 | 1 | 18/24 |
| 944.08 | 1 | 19/22 |
| 754.22 | 1 | 17/22 |
| 953.89 | 1 | 19/22 |
| 869.92 | 1 | 18/22 |
| 943.46 | 1 | 19/22 |
| 885.12 | 1 | 18/22 |
| 646.09 | 1 | 17/22 |
| 929.58 | 1 | 19/22 |
| 546.06 | 1 | 16/22 |
| 515.60 | 3 | 15/22 |
| 652.13 | 1 | 17/22 |
| 742.48 | 1 | 17/22 |
| #####  | 1 | 21/26 |
| #####  | 1 | 21/26 |
| 634.30 | 1 | 18/28 |
| 463.58 | 1 | 14/20 |
| 581.81 | 1 | 16/20 |
| #####  | 1 | 18/20 |
| 843.15 | 1 | 16/20 |
| 784.15 | 1 | 34/56 |
| 626.18 | 1 | 29/56 |
| #####  | 2 | 28/56 |
| #####  | 1 | 30/56 |
| #####  | 1 | 35/56 |
| 490.21 | 4 | 14/28 |
| 942.61 | 1 | 18/28 |
| 614.29 | 4 | 15/22 |
| 595.66 | 3 | 14/22 |
| 490.09 | 4 | 13/22 |

|        |   |       |
|--------|---|-------|
| 701.19 | 3 | 15/22 |
| 605.07 | 3 | 14/22 |
| 796.94 | 2 | 16/22 |
| 943.03 | 1 | 17/22 |
| 983.89 | 1 | 17/22 |
| 810.95 | 1 | 17/22 |
| 670.86 | 3 | 15/22 |
| #####  | 1 | 18/22 |
| #####  | 1 | 17/22 |
| 899.17 | 1 | 17/22 |
| 960.03 | 2 | 17/22 |
| 970.10 | 1 | 17/22 |
| #####  | 1 | 18/22 |
| 879.39 | 1 | 17/22 |
| #####  | 1 | 19/22 |
| #####  | 1 | 19/22 |
| #####  | 1 | 18/22 |
| #####  | 1 | 34/72 |
| 664.85 | 1 | 20/36 |
| 523.34 | 1 | 19/36 |
| 914.32 | 1 | 22/36 |
| 550.72 | 1 | 18/36 |
| 736.00 | 1 | 21/36 |
| 505.14 | 1 | 17/36 |
| 839.65 | 1 | 22/36 |
| 634.46 | 1 | 19/36 |
| 890.35 | 1 | 22/36 |
| 720.16 | 1 | 20/36 |
| 942.76 | 1 | 23/36 |
| 834.32 | 1 | 22/36 |
| #####  | 1 | 23/36 |
| 837.86 | 1 | 22/36 |
| 723.17 | 1 | 20/36 |
| #####  | 1 | 23/36 |
| 493.57 | 1 | 17/36 |
| #####  | 1 | 25/36 |
| 872.76 | 1 | 22/36 |
| 940.16 | 1 | 23/36 |
| #####  | 1 | 23/36 |
| #####  | 1 | 24/36 |
| #####  | 1 | 25/36 |
| 870.19 | 1 | 22/36 |
| #####  | 1 | 25/36 |
| 906.77 | 1 | 22/36 |
| #####  | 2 | 33/72 |
| #####  | 1 | 23/36 |
| #####  | 1 | 24/36 |
| 884.39 | 1 | 22/36 |
| #####  | 1 | 25/36 |
| #####  | 1 | 33/72 |
| #####  | 1 | 36/72 |
| #####  | 1 | 23/36 |
| 825.58 | 1 | 21/36 |
| 895.81 | 1 | 22/36 |
| #####  | 1 | 23/36 |
| #####  | 1 | 25/36 |

|        |   |       |
|--------|---|-------|
| #####  | 1 | 24/36 |
| #####  | 1 | 15/18 |
| 711.61 | 2 | 13/18 |
| 707.94 | 1 | 13/18 |
| 962.24 | 1 | 19/24 |
| #####  | 1 | 18/20 |
| #####  | 1 | 16/20 |
| #####  | 1 | 17/20 |
| #####  | 1 | 17/20 |
| 773.31 | 2 | 18/28 |
| #####  | 1 | 21/28 |
| #####  | 1 | 23/28 |
| 638.96 | 1 | 16/26 |
| 879.80 | 1 | 18/26 |
| #####  | 1 | 20/26 |
| 865.38 | 1 | 18/26 |
| 982.16 | 1 | 19/26 |
| #####  | 1 | 21/26 |
| #####  | 1 | 20/26 |
| 577.74 | 1 | 18/22 |
| 758.09 | 1 | 18/22 |
| 970.57 | 1 | 20/22 |
| 863.41 | 1 | 19/22 |
| 851.11 | 1 | 19/22 |
| 841.94 | 1 | 19/22 |
| 883.73 | 1 | 19/22 |
| 875.40 | 1 | 19/22 |
| 578.84 | 3 | 16/22 |
| 658.01 | 1 | 16/22 |
| 577.43 | 2 | 17/22 |
| 618.44 | 1 | 16/22 |
| 759.50 | 1 | 18/22 |
| 741.45 | 1 | 17/22 |
| 696.32 | 1 | 17/22 |
| 858.46 | 1 | 18/22 |
| 800.11 | 1 | 18/22 |
| 927.14 | 1 | 18/22 |
| 794.41 | 1 | 18/22 |
| 812.97 | 2 | 18/22 |
| 720.06 | 1 | 17/22 |
| 969.98 | 1 | 19/22 |
| 916.31 | 1 | 19/22 |
| 697.63 | 1 | 17/22 |
| 572.34 | 1 | 15/22 |
| #####  | 1 | 18/22 |
| 820.28 | 1 | 17/22 |
| 666.30 | 1 | 16/22 |
| 715.97 | 2 | 16/22 |
| 771.67 | 1 | 16/22 |
| 813.82 | 2 | 16/22 |
| #####  | 1 | 17/22 |
| 838.76 | 1 | 16/22 |
| #####  | 1 | 18/22 |
| #####  | 1 | 17/22 |
| #####  | 1 | 18/22 |
| #####  | 1 | 20/22 |

|        |   |       |
|--------|---|-------|
| #####  | 1 | 19/22 |
| #####  | 1 | 20/22 |
| #####  | 1 | 20/22 |
| #####  | 1 | 20/22 |
| 808.74 | 1 | 16/20 |
| #####  | 1 | 17/20 |
| #####  | 1 | 20/26 |
| #####  | 1 | 19/26 |
| #####  | 1 | 22/36 |
| #####  | 1 | 25/36 |
| #####  | 1 | 24/34 |
| #####  | 1 | 24/34 |
| #####  | 1 | 23/34 |
| #####  | 1 | 24/34 |
| 673.13 | 2 | 17/24 |
| 598.12 | 2 | 17/24 |
| 712.44 | 1 | 17/24 |
| #####  | 1 | 34/72 |
| #####  | 1 | 35/72 |
| 642.15 | 2 | 17/28 |
| 930.82 | 1 | 18/28 |
| 696.35 | 4 | 17/28 |
| 636.28 | 3 | 16/22 |
| 823.55 | 1 | 16/22 |
| 707.65 | 1 | 16/22 |
| 720.30 | 2 | 17/22 |
| 548.29 | 2 | 15/22 |
| 845.91 | 1 | 17/22 |
| 630.57 | 3 | 15/22 |
| 606.08 | 2 | 14/22 |
| 630.12 | 1 | 16/22 |
| 586.66 | 4 | 15/22 |
| 585.19 | 2 | 15/22 |
| 561.32 | 2 | 16/22 |
| 627.26 | 3 | 16/22 |
| 647.17 | 2 | 15/22 |
| 459.56 | 1 | 15/22 |
| 656.13 | 2 | 16/22 |
| #####  | 1 | 17/22 |
| 745.89 | 2 | 16/22 |
| 738.28 | 1 | 15/22 |
| 724.14 | 2 | 16/22 |
| 654.32 | 2 | 16/22 |
| #####  | 1 | 18/22 |
| 949.64 | 1 | 17/22 |
| 764.22 | 1 | 17/22 |
| 879.73 | 2 | 17/22 |
| #####  | 1 | 17/22 |
| 971.53 | 1 | 18/22 |
| 934.31 | 1 | 17/22 |
| 841.73 | 1 | 16/22 |
| 856.33 | 1 | 16/22 |
| 852.62 | 3 | 17/22 |
| #####  | 1 | 18/22 |
| 957.15 | 1 | 17/22 |
| 610.84 | 2 | 15/22 |

|        |   |       |
|--------|---|-------|
| 980.00 | 1 | 18/22 |
| 822.33 | 2 | 17/22 |
| 967.43 | 2 | 17/22 |
| 808.81 | 1 | 18/22 |
| #####  | 1 | 18/22 |
| 941.93 | 1 | 17/22 |
| 878.51 | 1 | 17/22 |
| 683.39 | 1 | 16/22 |
| 828.95 | 2 | 17/22 |
| 869.39 | 1 | 16/22 |
| 819.50 | 1 | 17/22 |
| #####  | 1 | 19/22 |
| 997.61 | 1 | 18/22 |
| #####  | 1 | 18/22 |
| 799.76 | 1 | 16/22 |
| 782.76 | 1 | 17/22 |
| #####  | 1 | 18/22 |
| 808.40 | 2 | 16/22 |
| #####  | 1 | 17/22 |
| #####  | 1 | 18/22 |
| 848.30 | 1 | 17/22 |
| #####  | 1 | 18/22 |
| #####  | 1 | 19/22 |
| #####  | 1 | 20/28 |
| 972.80 | 1 | 21/28 |
| 766.67 | 1 | 18/28 |
| 951.13 | 1 | 21/28 |
| #####  | 1 | 22/28 |
| #####  | 1 | 20/24 |
| #####  | 1 | 19/24 |
| #####  | 1 | 20/24 |
| #####  | 1 | 19/24 |
| #####  | 1 | 19/24 |
| #####  | 1 | 20/24 |
| #####  | 1 | 20/24 |
| 837.08 | 1 | 16/22 |
| #####  | 1 | 19/22 |
| 912.00 | 1 | 17/22 |
| 929.55 | 1 | 17/22 |
| #####  | 1 | 18/22 |
| #####  | 1 | 19/22 |
| #####  | 1 | 19/22 |
| #####  | 1 | 20/22 |
| 959.97 | 1 | 18/24 |
| 695.28 | 2 | 18/24 |
| 998.67 | 1 | 19/24 |
| 996.13 | 2 | 19/24 |
| #####  | 1 | 19/24 |
| #####  | 1 | 19/24 |
| #####  | 1 | 20/24 |
| #####  | 1 | 19/24 |
| #####  | 1 | 20/26 |
| #####  | 1 | 22/26 |
| #####  | 1 | 20/26 |
| #####  | 1 | 19/26 |
| #####  | 1 | 20/26 |

|        |   |       |
|--------|---|-------|
| 848.64 | 2 | 16/22 |
| 735.72 | 2 | 17/22 |
| #####  | 1 | 18/22 |
| #####  | 1 | 19/22 |
| #####  | 1 | 17/22 |
| #####  | 1 | 18/22 |
| #####  | 1 | 17/22 |
| 504.52 | 2 | 15/22 |
| 830.06 | 1 | 17/22 |
| 812.19 | 1 | 18/22 |
| 583.82 | 3 | 15/22 |
| 644.88 | 2 | 16/22 |
| 967.43 | 1 | 19/22 |
| 805.62 | 1 | 17/22 |
| 810.48 | 1 | 18/22 |
| 596.39 | 3 | 16/22 |
| #####  | 1 | 20/22 |
| 636.95 | 2 | 16/22 |
| 704.28 | 1 | 17/22 |
| #####  | 1 | 19/22 |
| #####  | 1 | 19/22 |
| 676.11 | 2 | 16/22 |
| #####  | 1 | 18/22 |
| 962.12 | 1 | 19/22 |
| 644.56 | 2 | 17/22 |
| #####  | 1 | 19/22 |
| #####  | 2 | 20/22 |
| #####  | 1 | 21/22 |
| #####  | 1 | 21/36 |
| #####  | 1 | 26/36 |
| #####  | 1 | 22/36 |
| #####  | 1 | 26/36 |
| 429.11 | 3 | 16/24 |
| #####  | 4 | 20/24 |
| #####  | 1 | 21/24 |
| #####  | 1 | 21/24 |
| #####  | 1 | 21/24 |
| #####  | 1 | 21/24 |
| #####  | 1 | 20/24 |
| #####  | 1 | 18/24 |
| #####  | 1 | 21/24 |
| 654.24 | 1 | 17/22 |
| 812.25 | 1 | 16/20 |
| 752.36 | 1 | 18/24 |
| 829.71 | 1 | 18/24 |
| 971.16 | 1 | 18/22 |
| 447.67 | 4 | 14/20 |
| 894.56 | 3 | 15/20 |
| #####  | 1 | 17/20 |
| 844.84 | 1 | 15/20 |
| 831.46 | 1 | 16/20 |
| #####  | 1 | 17/20 |
| 901.99 | 1 | 16/20 |
| 853.70 | 1 | 16/20 |
| #####  | 1 | 18/20 |
| 586.14 | 1 | 15/22 |

|        |   |       |
|--------|---|-------|
| 759.21 | 1 | 17/22 |
| #####  | 1 | 31/56 |
| #####  | 1 | 30/56 |
| 744.45 | 1 | 17/24 |
| #####  | 1 | 16/18 |
| 791.55 | 4 | 14/18 |
| 952.34 | 1 | 16/18 |
| 882.48 | 1 | 15/18 |
| #####  | 1 | 17/18 |
| 649.51 | 1 | 14/20 |
| 718.12 | 1 | 17/24 |
| 568.95 | 1 | 14/18 |
| 881.82 | 1 | 21/32 |
| 430.77 | 2 | 14/20 |
| 672.01 | 1 | 16/22 |
| #####  | 1 | 17/22 |
| 970.07 | 1 | 16/22 |
| #####  | 1 | 16/22 |
| #####  | 1 | 18/22 |
| #####  | 1 | 19/22 |
| #####  | 1 | 18/22 |
| 530.60 | 2 | 13/20 |
| 623.15 | 1 | 15/20 |
| 599.37 | 1 | 15/18 |
| 780.62 | 2 | 14/18 |
| #####  | 1 | 17/18 |
| 771.38 | 2 | 15/18 |
| 845.38 | 1 | 16/18 |
| #####  | 1 | 16/18 |
| #####  | 1 | 17/18 |
| 690.98 | 1 | 20/24 |
| #####  | 1 | 21/24 |
| #####  | 1 | 21/24 |
| 984.75 | 1 | 21/24 |
| #####  | 1 | 22/24 |
| 738.24 | 1 | 16/20 |
| #####  | 1 | 22/26 |
| #####  | 1 | 21/26 |
| 824.53 | 1 | 15/18 |
| 740.70 | 2 | 14/18 |
| 756.01 | 1 | 16/26 |
| #####  | 1 | 18/26 |
| #####  | 1 | 21/26 |
| #####  | 1 | 20/26 |
| #####  | 1 | 20/26 |
| #####  | 1 | 20/26 |
| #####  | 1 | 16/22 |
| #####  | 1 | 18/22 |
| #####  | 1 | 18/22 |
| #####  | 1 | 18/22 |
| #####  | 1 | 18/22 |
| 392.18 | 1 | 14/24 |
| 467.36 | 1 | 15/24 |
| 410.92 | 2 | 17/26 |
| #####  | 1 | 19/26 |
| 777.58 | 1 | 19/26 |

##### 1 20/26  
##### 1 20/26  
##### 1 22/26  
822.83 2 17/26  
844.94 1 18/26  
906.57 1 17/22  
733.45 1 17/22  
665.34 2 16/22  
870.11 1 16/20  
976.41 1 16/20  
##### 1 17/20  
843.90 1 17/24  
750.93 2 18/28  
717.58 2 14/20  
955.35 2 16/20  
##### 1 16/20  
##### 1 16/20  
##### 2 15/20  
##### 1 17/20  
##### 1 16/20  
##### 1 16/20  
##### 1 16/20  
##### 1 16/20  
##### 1 16/20  
##### 1 21/26  
##### 1 21/26  
##### 1 22/26  
##### 1 23/26  
##### 1 22/26  
##### 1 23/26  
##### 1 23/26  
##### 1 23/26  
833.59 1 16/20  
944.56 1 17/20  
##### 1 17/20  
975.69 1 17/20  
979.38 1 19/24  
##### 1 21/24  
993.32 1 19/24  
910.65 1 18/24  
##### 1 20/24  
##### 1 28/56  
##### 1 25/28  
##### 1 32/56  
##### 1 25/28  
##### 1 22/28  
##### 1 25/28  
##### 1 33/56  
##### 1 32/56  
##### 1 33/56  
##### 1 28/56  
##### 1 29/56  
##### 3 27/56  
##### 1 30/56  
##### 1 32/56  
679.24 1 15/22  
##### 1 18/22



|        |   |       |
|--------|---|-------|
| 769.13 | 2 | 16/20 |
| #####  | 1 | 18/20 |
| #####  | 1 | 18/20 |
| #####  | 1 | 18/20 |
| #####  | 1 | 18/20 |
| #####  | 1 | 21/28 |
| #####  | 1 | 22/28 |
| #####  | 1 | 23/28 |
| 570.20 | 4 | 16/20 |
| 755.09 | 2 | 16/20 |
| 841.65 | 2 | 17/20 |
| #####  | 1 | 21/26 |
| #####  | 1 | 21/26 |
| #####  | 2 | 21/26 |
| #####  | 1 | 21/26 |
| #####  | 1 | 21/26 |
| #####  | 1 | 21/26 |
| 970.44 | 1 | 17/26 |
| 452.90 | 4 | 17/26 |
| 600.58 | 3 | 17/26 |
| #####  | 1 | 20/26 |
| #####  | 1 | 20/26 |
| #####  | 1 | 22/26 |
| #####  | 1 | 22/26 |
| #####  | 1 | 22/26 |
| #####  | 1 | 21/28 |
| #####  | 1 | 29/56 |
| #####  | 1 | 23/28 |
| #####  | 1 | 22/28 |
| #####  | 1 | 22/28 |
| 952.33 | 1 | 18/20 |
| 642.22 | 1 | 16/20 |
| 913.41 | 1 | 18/20 |
| 858.10 | 1 | 18/20 |
| 831.54 | 2 | 17/20 |
| 809.22 | 1 | 17/20 |
| #####  | 1 | 17/20 |
| 829.56 | 1 | 17/20 |
| #####  | 1 | 18/20 |
| 805.01 | 1 | 17/20 |
| 862.53 | 1 | 17/20 |
| #####  | 1 | 18/20 |
| 965.66 | 1 | 18/20 |
| #####  | 1 | 18/20 |
| 912.61 | 1 | 18/20 |
| #####  | 1 | 18/20 |
| #####  | 1 | 17/22 |
| #####  | 1 | 18/22 |
| #####  | 1 | 19/22 |
| 599.46 | 3 | 14/18 |
| #####  | 1 | 16/18 |
| #####  | 1 | 22/30 |
| #####  | 1 | 20/28 |
| #####  | 2 | 31/56 |
| #####  | 1 | 31/56 |
| #####  | 1 | 21/28 |

##### 1 30/56  
##### 1 21/28  
##### 1 22/28  
929.78 1 16/18  
##### 1 15/18  
921.68 1 15/18  
##### 1 15/18  
##### 1 16/18  
##### 1 16/18  
##### 1 16/18  
##### 1 19/24  
##### 1 20/24  
##### 1 20/24  
##### 1 21/24  
##### 1 19/24  
##### 1 20/24  
##### 1 20/24  
670.66 1 17/24  
##### 1 17/24  
##### 1 18/24  
##### 1 18/24  
##### 1 24/32  
847.66 1 17/22  
710.14 1 18/22  
556.66 2 16/22  
802.92 1 17/22  
##### 1 18/22  
##### 1 20/22  
##### 1 20/22  
758.41 1 18/32  
788.11 1 18/32  
##### 1 30/52  
517.93 4 15/20  
631.42 2 16/20  
917.72 1 18/20  
774.53 1 15/18  
632.52 1 14/16  
##### 1 25/52  
##### 2 29/52  
##### 4 27/52  
##### 1 19/22  
715.72 1 18/24  
853.07 1 19/24  
##### 1 27/48  
529.49 1 14/18  
##### 1 17/20  
515.29 2 14/20  
##### 1 18/20  
##### 1 18/20  
##### 1 18/20  
716.74 1 16/22  
##### 1 19/22  
913.25 1 17/22  
##### 1 16/22  
##### 1 17/22  
##### 1 19/22

|        |   |       |
|--------|---|-------|
| 710.84 | 1 | 16/24 |
| #####  | 1 | 18/24 |
| #####  | 1 | 17/24 |
| #####  | 1 | 17/24 |
| #####  | 1 | 18/24 |
| #####  | 1 | 17/24 |
| #####  | 1 | 18/24 |
| #####  | 1 | 18/24 |
| 912.20 | 1 | 15/24 |
| #####  | 1 | 18/24 |
| #####  | 1 | 17/24 |
| #####  | 1 | 18/24 |
| #####  | 1 | 18/24 |
| #####  | 1 | 17/24 |
| #####  | 1 | 18/24 |
| 896.54 | 1 | 19/26 |
| #####  | 1 | 17/18 |
| 938.80 | 1 | 16/18 |
| 860.86 | 1 | 23/30 |
| 806.29 | 1 | 23/30 |
| #####  | 2 | 17/18 |
| 785.43 | 2 | 14/18 |
| 559.67 | 2 | 13/18 |
| #####  | 1 | 16/18 |
| 584.03 | 1 | 14/18 |
| #####  | 1 | 16/18 |
| 894.58 | 1 | 15/18 |
| #####  | 3 | 29/56 |
| 389.25 | 2 | 43435 |
| 970.72 | 1 | 16/18 |
| #####  | 1 | 17/18 |
| #####  | 1 | 19/22 |
| 630.19 | 1 | 17/22 |
| #####  | 1 | 18/22 |
| #####  | 1 | 17/22 |
| 839.95 | 1 | 16/22 |
| #####  | 1 | 18/22 |
| 742.56 | 1 | 18/22 |
| 772.50 | 2 | 17/22 |
| 712.28 | 1 | 16/22 |
| #####  | 1 | 19/22 |
| #####  | 1 | 18/22 |
| #####  | 1 | 18/22 |
| 923.92 | 1 | 17/22 |
| #####  | 1 | 18/22 |
| #####  | 1 | 20/26 |
| #####  | 1 | 21/26 |
| 864.63 | 1 | 16/18 |
| #####  | 1 | 16/18 |
| 892.19 | 1 | 16/18 |
| 483.52 | 1 | 15/22 |
| 601.51 | 1 | 17/22 |
| #####  | 1 | 21/26 |
| 587.89 | 2 | 13/20 |
| 667.46 | 1 | 14/20 |
| 672.26 | 1 | 20/30 |

##### 1 21/30  
##### 1 22/30  
##### 1 23/30  
747.51 1 22/30  
620.28 1 20/30  
##### 1 23/30  
685.72 1 21/30  
##### 1 24/30  
735.78 1 17/22  
721.12 1 15/22  
##### 1 18/22  
753.09 1 17/20  
656.97 1 16/20  
572.48 1 15/20  
802.71 1 17/20  
653.68 1 16/20  
437.51 3 15/20  
##### 1 18/20  
686.66 3 15/20  
975.03 1 17/20  
603.40 4 15/20  
750.58 1 17/20  
979.98 1 16/20  
##### 1 17/20  
987.24 1 16/20  
##### 1 17/20  
##### 1 17/20  
##### 1 18/20  
783.22 2 16/20  
902.68 1 17/20  
959.89 2 18/20  
##### 1 22/26  
##### 1 22/26  
##### 1 20/26  
##### 1 19/26  
##### 1 23/26  
##### 1 22/26  
##### 1 20/26  
##### 1 22/26  
##### 1 23/26  
##### 1 22/26  
##### 1 22/26  
##### 1 23/26  
370.53 3 14/34  
##### 1 20/30  
696.90 3 15/20  
##### 1 18/20  
##### 1 18/20  
##### 1 17/20  
659.03 2 13/18  
574.49 2 13/18  
748.61 1 14/18  
950.62 1 18/26  
##### 1 21/26  
##### 1 21/26  
##### 1 21/26

##### 1 21/26  
##### 1 21/26  
##### 1 21/26  
##### 1 19/30  
##### 1 24/30  
##### 1 23/30  
##### 1 24/30  
##### 1 24/30  
##### 1 24/30  
##### 1 24/30  
897.93 1 20/28  
958.62 1 21/28  
689.63 1 18/24  
653.74 1 18/24  
497.08 4 17/24  
887.83 1 19/24  
729.04 1 18/24  
##### 1 19/24  
##### 1 19/24  
##### 1 20/24  
##### 1 20/24  
##### 1 20/24  
##### 1 20/24  
##### 1 25/30  
743.92 1 17/24  
880.75 1 18/24  
792.12 1 17/24  
866.74 1 18/24  
808.69 1 21/38  
##### 1 19/24  
##### 1 19/24  
##### 1 17/24  
##### 1 17/24  
744.54 1 17/24  
974.44 1 18/24  
932.35 1 18/24  
##### 1 20/24  
##### 1 21/24  
##### 1 20/24  
929.96 1 16/20  
##### 1 17/20  
859.27 1 16/20  
##### 1 17/22  
##### 1 17/22  
##### 1 17/22  
##### 1 18/22  
##### 1 18/22  
952.69 1 17/22  
##### 1 20/22  
893.57 1 17/22  
733.11 1 18/24  
733.11 2 18/24  
##### 1 19/24  
721.78 3 15/24  
##### 1 17/24  
##### 1 20/24  
##### 1 19/24  
##### 1 20/24

|        |   |       |
|--------|---|-------|
| 652.79 | 1 | 23/34 |
| 758.49 | 1 | 23/34 |
| 718.50 | 1 | 21/30 |
| 953.43 | 1 | 30/60 |
| 986.86 | 1 | 21/30 |
| 766.74 | 1 | 17/22 |
| 746.70 | 2 | 17/22 |
| 919.00 | 1 | 17/22 |
| 698.85 | 2 | 17/22 |
| 982.94 | 1 | 16/20 |
| 912.15 | 1 | 16/20 |
| #####  | 1 | 18/22 |
| #####  | 1 | 18/22 |
| #####  | 1 | 18/22 |
| #####  | 1 | 20/30 |
| 833.32 | 1 | 17/20 |
| 551.98 | 1 | 16/20 |
| 555.08 | 1 | 16/20 |
| #####  | 1 | 17/20 |
| #####  | 1 | 21/26 |
| 932.22 | 1 | 20/26 |
| 662.09 | 1 | 16/24 |
| 754.59 | 1 | 16/24 |
| 790.14 | 1 | 16/24 |
| #####  | 1 | 18/20 |
| #####  | 1 | 17/20 |
| #####  | 1 | 17/20 |
| #####  | 1 | 18/20 |
| #####  | 1 | 19/20 |
| #####  | 1 | 18/20 |
| #####  | 1 | 18/20 |
| 828.74 | 1 | 13/14 |
| 742.66 | 2 | 13/14 |
| 796.79 | 1 | 13/14 |
| 752.58 | 1 | 13/14 |
| 781.50 | 1 | 13/14 |
| 773.41 | 2 | 13/14 |
| 806.94 | 1 | 13/14 |
| 749.67 | 2 | 13/14 |
| 846.05 | 1 | 13/14 |
| 722.02 | 1 | 13/14 |
| 803.27 | 2 | 13/14 |
| 676.02 | 1 | 13/14 |
| 699.97 | 2 | 13/14 |
| 428.90 | 4 | 15/22 |
| 531.14 | 3 | 17/22 |
| 515.91 | 2 | 18/34 |
| 583.14 | 1 | 20/34 |
| 587.92 | 1 | 20/34 |
| 900.73 | 1 | 24/34 |
| 829.57 | 1 | 23/34 |
| #####  | 1 | 20/30 |
| #####  | 1 | 20/30 |
| #####  | 1 | 20/26 |
| 975.95 | 1 | 20/26 |
| #####  | 1 | 20/26 |

|        |   |       |
|--------|---|-------|
| #####  | 1 | 21/30 |
| 989.32 | 2 | 19/30 |
| #####  | 1 | 19/30 |
| #####  | 1 | 22/24 |
| 689.11 | 1 | 18/24 |
| 434.11 | 4 | 15/24 |
| 746.84 | 1 | 15/24 |
| 736.66 | 1 | 19/24 |
| 765.73 | 4 | 17/24 |
| 633.75 | 4 | 16/24 |
| 426.31 | 1 | 15/24 |
| 829.98 | 1 | 17/24 |
| 385.56 | 3 | 18/24 |
| 642.99 | 1 | 15/24 |
| 904.70 | 2 | 16/24 |
| 606.79 | 1 | 18/24 |
| #####  | 1 | 19/24 |
| 908.94 | 2 | 18/24 |
| #####  | 1 | 19/24 |
| #####  | 1 | 18/24 |
| #####  | 1 | 20/24 |
| #####  | 2 | 18/24 |
| #####  | 1 | 19/24 |
| #####  | 1 | 19/24 |
| #####  | 1 | 21/24 |
| #####  | 1 | 20/24 |
| #####  | 1 | 21/24 |
| #####  | 1 | 19/24 |
| #####  | 1 | 19/24 |
| #####  | 1 | 20/24 |
| #####  | 1 | 19/24 |
| #####  | 1 | 20/24 |
| #####  | 1 | 19/24 |
| #####  | 1 | 19/24 |
| #####  | 1 | 20/24 |
| #####  | 1 | 21/24 |
| 768.20 | 1 | 18/24 |
| #####  | 1 | 18/24 |
| #####  | 1 | 18/24 |
| #####  | 1 | 20/24 |
| #####  | 1 | 20/24 |
| 880.94 | 1 | 19/24 |
| #####  | 1 | 20/24 |
| #####  | 1 | 19/24 |
| #####  | 1 | 20/24 |
| #####  | 1 | 21/24 |
| #####  | 1 | 19/24 |
| #####  | 1 | 20/24 |
| #####  | 1 | 19/24 |
| #####  | 1 | 18/24 |
| #####  | 1 | 19/24 |
| #####  | 1 | 20/24 |
| #####  | 1 | 21/24 |
| #####  | 1 | 21/24 |
| #####  | 1 | 19/24 |
| #####  | 1 | 20/24 |

|        |   |       |
|--------|---|-------|
| #####  | 1 | 21/24 |
| #####  | 1 | 20/24 |
| #####  | 1 | 22/24 |
| #####  | 1 | 19/24 |
| #####  | 1 | 21/24 |
| #####  | 1 | 20/24 |
| #####  | 1 | 21/24 |
| #####  | 1 | 21/24 |
| #####  | 1 | 22/24 |
| #####  | 1 | 22/24 |
| #####  | 1 | 22/24 |
| #####  | 1 | 20/24 |
| #####  | 1 | 21/24 |
| #####  | 1 | 21/24 |
| #####  | 1 | 20/24 |
| #####  | 1 | 22/24 |
| #####  | 1 | 20/24 |
| #####  | 1 | 22/24 |
| 683.21 | 1 | 17/22 |
| 763.18 | 1 | 17/22 |
| 782.95 | 1 | 17/22 |
| 676.59 | 2 | 13/16 |
| 948.57 | 1 | 19/22 |
| 679.19 | 1 | 16/22 |
| #####  | 1 | 17/20 |
| 680.51 | 1 | 15/20 |
| 730.65 | 1 | 16/22 |
| 939.30 | 3 | 16/22 |
| 991.45 | 2 | 16/22 |
| #####  | 3 | 16/22 |
| #####  | 4 | 16/22 |
| #####  | 2 | 17/22 |
| 971.86 | 2 | 17/22 |
| #####  | 3 | 16/22 |
| 439.95 | 1 | 16/22 |
| 574.10 | 1 | 17/22 |
| 390.88 | 2 | 14/22 |
| 511.72 | 1 | 22/34 |
| #####  | 1 | 34/68 |
| #####  | 1 | 34/68 |
| 723.31 | 1 | 26/34 |
| 435.14 | 2 | 21/34 |
| 703.44 | 1 | 24/34 |
| 607.40 | 1 | 24/34 |
| 833.32 | 1 | 27/34 |
| 688.12 | 1 | 24/34 |
| 804.35 | 1 | 26/34 |
| 708.87 | 1 | 24/34 |
| 837.13 | 4 | 15/20 |
| #####  | 1 | 16/20 |
| 980.08 | 1 | 16/20 |
| 981.36 | 1 | 16/20 |
| #####  | 1 | 16/20 |
| #####  | 1 | 17/20 |
| 785.59 | 1 | 17/20 |
| 725.76 | 2 | 15/20 |



|        |   |       |
|--------|---|-------|
| #####  | 1 | 21/28 |
| #####  | 1 | 21/32 |
| #####  | 1 | 19/32 |
| #####  | 1 | 22/32 |
| #####  | 1 | 25/44 |
| 463.76 | 4 | 14/22 |
| 822.05 | 1 | 17/22 |
| 383.46 | 3 | 13/20 |
| 404.58 | 1 | 17/28 |
| 446.88 | 1 | 18/28 |
| 647.96 | 1 | 20/28 |
| 627.87 | 1 | 20/28 |
| #####  | 1 | 28/56 |
| 540.72 | 1 | 19/28 |
| 682.92 | 1 | 20/28 |
| 748.63 | 1 | 21/28 |
| 690.00 | 1 | 20/28 |
| 889.27 | 1 | 22/28 |
| 725.63 | 1 | 20/28 |
| 783.49 | 1 | 21/28 |
| 591.53 | 2 | 15/22 |
| 872.14 | 1 | 17/22 |
| 966.93 | 1 | 18/22 |
| #####  | 1 | 18/22 |
| #####  | 1 | 18/22 |
| 728.95 | 2 | 16/24 |
| 741.83 | 1 | 16/20 |
| 572.78 | 4 | 14/20 |
| 922.36 | 1 | 20/28 |
| #####  | 1 | 22/28 |
| #####  | 1 | 23/28 |
| #####  | 1 | 24/28 |
| #####  | 1 | 24/28 |
| 544.97 | 1 | 17/26 |
| 508.49 | 4 | 16/26 |
| #####  | 1 | 17/22 |
| 728.90 | 1 | 14/18 |
| 808.74 | 1 | 15/18 |
| 616.57 | 1 | 14/18 |
| 836.15 | 1 | 16/18 |
| 834.52 | 1 | 16/18 |
| 855.55 | 1 | 16/18 |
| 770.12 | 1 | 15/18 |
| 569.84 | 1 | 13/22 |
| 777.67 | 1 | 14/22 |
| #####  | 1 | 17/22 |
| #####  | 1 | 20/22 |
| 909.58 | 1 | 17/24 |
| 894.93 | 2 | 18/24 |
| 718.83 | 3 | 15/20 |
| #####  | 1 | 16/20 |
| #####  | 1 | 16/20 |
| #####  | 1 | 18/22 |
| 727.18 | 1 | 17/22 |
| 836.86 | 1 | 16/22 |
| 809.19 | 1 | 17/22 |

|        |   |       |
|--------|---|-------|
| 902.00 | 1 | 17/22 |
| 705.41 | 1 | 15/22 |
| 572.62 | 1 | 15/22 |
| 789.60 | 1 | 16/22 |
| 856.23 | 1 | 15/22 |
| 750.49 | 3 | 15/22 |
| 826.06 | 1 | 16/22 |
| 593.58 | 1 | 15/22 |
| 833.33 | 1 | 16/22 |
| #####  | 1 | 17/22 |
| #####  | 1 | 17/22 |
| 930.50 | 1 | 17/22 |
| #####  | 1 | 17/22 |
| 961.24 | 1 | 16/22 |
| #####  | 1 | 17/22 |
| #####  | 1 | 18/22 |
| #####  | 1 | 17/22 |
| 849.30 | 1 | 16/22 |
| #####  | 1 | 18/22 |
| 689.74 | 3 | 14/22 |
| #####  | 1 | 16/22 |
| 993.25 | 1 | 18/22 |
| #####  | 1 | 18/22 |
| #####  | 1 | 17/22 |
| #####  | 1 | 18/22 |
| 924.48 | 1 | 16/22 |
| #####  | 1 | 18/22 |
| #####  | 1 | 19/22 |
| #####  | 1 | 18/22 |
| #####  | 1 | 18/22 |
| #####  | 1 | 17/22 |
| #####  | 1 | 18/22 |
| #####  | 1 | 18/22 |
| #####  | 1 | 18/22 |
| #####  | 1 | 19/22 |
| 677.44 | 2 | 18/24 |
| 674.75 | 2 | 18/24 |
| 564.80 | 1 | 17/24 |
| 631.92 | 3 | 15/18 |
| #####  | 2 | 16/18 |
| #####  | 1 | 16/18 |
| 834.95 | 1 | 19/30 |
| 655.23 | 2 | 14/20 |
| 654.54 | 2 | 14/20 |
| #####  | 1 | 17/22 |
| #####  | 1 | 18/22 |
| #####  | 1 | 19/22 |
| #####  | 1 | 17/22 |
| #####  | 1 | 18/22 |
| #####  | 1 | 20/24 |
| #####  | 1 | 21/24 |
| #####  | 1 | 21/24 |
| #####  | 1 | 18/22 |
| #####  | 1 | 17/22 |
| #####  | 1 | 17/22 |
| 783.64 | 3 | 15/22 |

|        |   |       |
|--------|---|-------|
| #####  | 1 | 18/22 |
| #####  | 1 | 18/22 |
| 695.30 | 1 | 16/22 |
| #####  | 1 | 19/22 |
| #####  | 1 | 18/22 |
| #####  | 1 | 18/22 |
| #####  | 1 | 18/22 |
| #####  | 1 | 18/22 |
| #####  | 1 | 18/22 |
| 606.00 | 1 | 16/22 |
| 989.94 | 1 | 18/22 |
| 844.92 | 2 | 17/22 |
| 609.98 | 3 | 15/22 |
| #####  | 1 | 19/22 |
| 984.07 | 1 | 16/20 |
| 879.30 | 2 | 16/20 |
| 920.40 | 1 | 16/20 |
| 735.15 | 1 | 19/26 |
| 879.14 | 1 | 15/18 |
| 796.68 | 2 | 14/18 |
| #####  | 1 | 15/18 |
| #####  | 1 | 15/18 |
| 802.44 | 1 | 18/28 |
| #####  | 1 | 20/28 |
| #####  | 1 | 21/28 |
| 699.34 | 2 | 14/18 |
| 771.09 | 1 | 14/18 |
| 924.04 | 1 | 15/18 |
| 723.34 | 1 | 15/18 |
| 965.72 | 2 | 17/18 |
| #####  | 1 | 18/26 |
| #####  | 1 | 20/26 |
| #####  | 1 | 20/26 |
| #####  | 1 | 20/26 |
| #####  | 1 | 20/26 |
| #####  | 1 | 21/26 |
| #####  | 1 | 19/26 |
| 538.21 | 3 | 16/28 |
| 632.16 | 1 | 17/28 |
| 582.44 | 3 | 16/28 |
| 679.21 | 1 | 17/28 |
| 899.91 | 1 | 20/28 |
| 765.97 | 1 | 18/28 |
| 705.49 | 3 | 18/28 |
| 589.59 | 1 | 18/28 |
| 771.57 | 1 | 19/28 |
| 924.60 | 1 | 20/28 |
| #####  | 1 | 21/28 |
| 829.62 | 1 | 20/28 |
| 718.70 | 1 | 18/28 |
| 896.40 | 1 | 20/28 |
| 991.59 | 1 | 21/28 |
| 966.97 | 1 | 19/34 |
| #####  | 1 | 20/34 |
| 839.21 | 2 | 17/22 |
| #####  | 1 | 18/22 |
| 999.33 | 2 | 18/22 |

|        |   |       |
|--------|---|-------|
| #####  | 2 | 18/22 |
| #####  | 2 | 17/20 |
| #####  | 1 | 20/28 |
| #####  | 1 | 20/28 |
| #####  | 1 | 21/28 |
| 695.98 | 1 | 17/28 |
| 577.42 | 1 | 16/28 |
| 636.48 | 1 | 17/28 |
| 810.39 | 1 | 18/28 |
| 725.85 | 1 | 17/28 |
| 382.22 | 2 | 14/24 |
| 517.49 | 2 | 15/24 |
| 777.10 | 2 | 16/24 |
| 842.53 | 1 | 18/24 |
| 522.15 | 2 | 15/20 |
| 719.92 | 4 | 16/20 |
| 354.82 | 3 | 18/32 |
| #####  | 1 | 34/88 |
| 534.98 | 1 | 18/24 |
| 478.71 | 1 | 16/24 |
| 410.12 | 1 | 18/24 |
| 779.40 | 1 | 18/24 |
| 656.23 | 1 | 17/24 |
| 964.50 | 1 | 19/24 |
| 715.44 | 1 | 17/24 |
| #####  | 1 | 19/24 |
| #####  | 1 | 19/24 |
| #####  | 1 | 25/36 |
| 933.68 | 1 | 16/22 |
| 560.50 | 1 | 15/18 |
| 551.19 | 4 | 13/18 |
| 579.61 | 2 | 15/18 |
| 622.25 | 1 | 15/18 |
| 852.46 | 1 | 16/18 |
| 595.67 | 1 | 15/18 |
| 577.50 | 1 | 15/18 |
| 747.36 | 1 | 16/18 |
| 266.19 | 1 | 14/18 |
| 711.01 | 1 | 16/18 |
| 706.15 | 1 | 16/18 |
| 731.78 | 1 | 15/18 |
| 894.36 | 1 | 16/18 |
| 729.13 | 1 | 16/18 |
| 842.75 | 1 | 16/18 |
| 785.53 | 1 | 16/18 |
| 677.57 | 1 | 16/18 |
| 754.48 | 1 | 16/18 |
| 807.41 | 1 | 16/18 |
| 841.84 | 1 | 16/18 |
| #####  | 1 | 16/18 |
| 860.89 | 1 | 16/18 |
| 538.79 | 1 | 13/16 |
| 980.23 | 1 | 21/24 |
| 953.91 | 1 | 21/24 |
| 890.71 | 1 | 20/24 |
| 880.70 | 1 | 20/24 |

|        |   |       |
|--------|---|-------|
| #####  | 1 | 21/24 |
| 616.50 | 1 | 13/18 |
| 575.36 | 1 | 14/18 |
| 430.63 | 1 | 16/18 |
| 756.16 | 1 | 18/24 |
| #####  | 1 | 20/24 |
| #####  | 1 | 21/24 |
| #####  | 1 | 21/24 |
| #####  | 1 | 30/60 |
| #####  | 4 | 28/60 |
| #####  | 2 | 32/60 |
| #####  | 1 | 30/60 |
| 878.41 | 1 | 19/28 |
| 739.78 | 1 | 16/22 |
| 847.49 | 1 | 17/22 |
| #####  | 1 | 19/22 |
| #####  | 1 | 33/88 |
| 988.92 | 1 | 18/24 |
| 702.63 | 1 | 15/24 |
| 847.00 | 1 | 17/24 |
| #####  | 1 | 19/24 |
| #####  | 1 | 18/24 |
| 831.48 | 1 | 17/24 |
| 659.12 | 1 | 17/24 |
| 734.12 | 1 | 16/24 |
| 748.68 | 1 | 16/24 |
| #####  | 1 | 21/28 |
| #####  | 1 | 19/28 |
| 746.58 | 1 | 14/18 |
| 711.06 | 2 | 14/18 |
| 928.19 | 1 | 15/18 |
| #####  | 1 | 19/22 |
| #####  | 1 | 19/22 |
| #####  | 1 | 19/22 |
| 701.18 | 2 | 15/18 |
| 836.77 | 2 | 15/18 |
| 498.33 | 3 | 15/22 |
| 532.18 | 3 | 16/22 |
| 625.96 | 2 | 15/18 |
| 515.21 | 4 | 14/18 |
| 646.78 | 1 | 15/18 |
| 722.18 | 2 | 16/18 |
| 533.91 | 2 | 15/18 |
| 558.21 | 4 | 15/18 |
| 483.21 | 4 | 14/18 |
| 902.44 | 2 | 15/18 |
| 825.92 | 1 | 16/18 |
| 662.94 | 1 | 15/18 |
| 686.69 | 2 | 16/18 |
| 738.29 | 1 | 15/18 |
| 784.36 | 1 | 16/18 |
| 812.69 | 1 | 16/18 |
| 713.58 | 1 | 16/18 |
| 622.54 | 2 | 15/18 |
| 663.75 | 3 | 16/18 |
| 609.19 | 2 | 15/18 |

|        |   |       |
|--------|---|-------|
| 763.49 | 1 | 15/18 |
| 602.45 | 1 | 15/18 |
| 556.61 | 2 | 16/18 |
| 520.16 | 1 | 15/18 |
| 735.67 | 1 | 16/18 |
| 943.42 | 1 | 17/18 |
| 759.01 | 1 | 16/18 |
| 693.49 | 2 | 15/18 |
| 861.66 | 1 | 16/18 |
| 816.87 | 1 | 16/18 |
| #####  | 1 | 17/18 |
| 713.91 | 1 | 16/18 |
| 585.38 | 4 | 15/18 |
| 806.21 | 1 | 16/18 |
| #####  | 1 | 17/18 |
| #####  | 1 | 17/18 |
| 583.25 | 2 | 15/18 |
| #####  | 1 | 17/18 |
| 815.67 | 1 | 16/18 |
| #####  | 1 | 17/18 |
| #####  | 1 | 17/18 |
| #####  | 1 | 17/18 |
| #####  | 1 | 17/18 |
| #####  | 1 | 17/18 |
| #####  | 1 | 17/18 |
| #####  | 1 | 19/22 |
| #####  | 1 | 20/22 |
| #####  | 1 | 19/22 |
| #####  | 1 | 20/22 |
| #####  | 1 | 20/22 |
| #####  | 1 | 20/22 |
| #####  | 1 | 19/22 |
| #####  | 1 | 20/22 |
| #####  | 1 | 20/22 |
| #####  | 1 | 20/22 |
| #####  | 1 | 20/22 |
| 789.94 | 1 | 16/18 |
| 999.01 | 1 | 16/18 |
| #####  | 1 | 16/18 |
| 797.25 | 1 | 15/18 |
| 948.68 | 1 | 19/26 |
| 931.14 | 1 | 18/26 |
| 905.67 | 1 | 19/26 |
| 926.51 | 1 | 19/26 |
| 873.26 | 1 | 19/26 |
| #####  | 1 | 19/22 |
| #####  | 1 | 18/22 |
| 662.27 | 2 | 15/20 |
| 860.38 | 1 | 17/20 |
| 703.21 | 1 | 16/20 |
| 775.15 | 1 | 14/16 |
| 969.56 | 1 | 15/16 |
| #####  | 1 | 19/24 |
| 656.75 | 1 | 17/24 |
| #####  | 1 | 21/24 |
| 353.56 | 1 | 15/22 |
| 304.46 | 1 | 15/22 |
| 288.91 | 1 | 15/22 |
| #####  | 1 | 19/20 |

|        |   |       |
|--------|---|-------|
| #####  | 1 | 19/20 |
| #####  | 1 | 19/20 |
| 373.13 | 1 | 19/24 |
| 375.37 | 1 | 18/24 |
| 495.16 | 1 | 17/24 |
| #####  | 1 | 40/84 |
| #####  | 1 | 39/84 |
| #####  | 1 | 45/84 |
| #####  | 1 | 18/24 |
| #####  | 1 | 22/32 |
| 826.07 | 1 | 17/20 |
| #####  | 1 | 18/20 |
| #####  | 1 | 18/20 |
| #####  | 1 | 18/20 |
| #####  | 1 | 18/20 |
| #####  | 1 | 18/20 |
| #####  | 1 | 19/24 |
| #####  | 1 | 20/24 |
| 490.18 | 1 | 15/22 |
| 592.99 | 1 | 17/24 |
| #####  | 1 | 22/28 |
| #####  | 1 | 23/28 |
| 408.20 | 1 | 14/20 |
| 503.54 | 1 | 16/20 |
| 702.58 | 1 | 16/20 |
| #####  | 1 | 17/20 |
| #####  | 1 | 17/20 |
| #####  | 1 | 18/20 |
| #####  | 1 | 25/28 |
| #####  | 1 | 25/28 |
| #####  | 1 | 18/22 |
| 813.87 | 1 | 17/26 |
| 875.90 | 1 | 17/24 |
| #####  | 1 | 18/22 |
| 882.65 | 1 | 17/22 |
| #####  | 1 | 18/22 |
| #####  | 1 | 23/28 |
| #####  | 1 | 23/28 |
| #####  | 1 | 24/28 |
| #####  | 1 | 24/28 |
| #####  | 1 | 24/28 |
| 861.52 | 1 | 19/24 |
| 689.44 | 1 | 17/24 |
| 950.78 | 1 | 19/24 |
| #####  | 1 | 20/24 |
| #####  | 1 | 15/16 |
| 883.92 | 1 | 14/18 |
| #####  | 1 | 16/18 |
| #####  | 1 | 43/92 |
| #####  | 1 | 40/92 |
| #####  | 1 | 15/18 |
| 838.47 | 1 | 14/18 |
| 924.22 | 2 | 14/18 |
| 547.84 | 2 | 13/18 |
| 559.63 | 2 | 13/18 |
| 571.17 | 4 | 13/18 |

|        |   |       |
|--------|---|-------|
| 702.66 | 1 | 14/18 |
| 699.51 | 2 | 14/18 |
| 874.89 | 1 | 16/20 |
| 835.56 | 1 | 16/22 |
| #####  | 1 | 19/22 |
| #####  | 1 | 20/24 |
| #####  | 1 | 20/24 |
| #####  | 1 | 17/24 |
| #####  | 1 | 19/28 |
| #####  | 1 | 22/32 |
| #####  | 1 | 24/32 |
| #####  | 1 | 22/32 |
| 578.74 | 3 | 15/20 |
| 934.52 | 1 | 16/20 |
| 627.89 | 1 | 17/22 |
| 817.84 | 1 | 22/32 |
| 826.83 | 1 | 22/32 |
| 740.31 | 1 | 21/32 |
| 998.34 | 1 | 19/24 |
| 783.58 | 4 | 16/22 |
| 816.82 | 1 | 20/30 |
| 720.15 | 2 | 19/30 |
| #####  | 1 | 24/30 |
| #####  | 1 | 23/30 |
| #####  | 1 | 24/30 |
| 850.81 | 1 | 20/30 |
| #####  | 1 | 23/30 |
| #####  | 1 | 20/26 |
| #####  | 1 | 20/26 |
| 894.76 | 2 | 15/18 |
| 659.27 | 3 | 14/18 |
| 620.77 | 4 | 14/18 |
| 649.54 | 3 | 14/18 |
| 598.59 | 1 | 17/26 |
| 576.79 | 1 | 17/24 |
| 297.64 | 4 | 15/24 |
| 847.06 | 1 | 18/24 |
| 494.41 | 1 | 18/24 |
| 512.62 | 1 | 17/24 |
| 699.33 | 1 | 17/24 |
| 721.63 | 1 | 18/24 |
| 760.44 | 1 | 18/24 |
| 861.94 | 1 | 19/24 |
| 875.59 | 1 | 19/24 |
| 924.68 | 1 | 20/24 |
| 686.14 | 1 | 18/24 |
| 596.21 | 1 | 17/24 |
| 890.51 | 2 | 16/22 |
| #####  | 2 | 18/22 |
| #####  | 1 | 20/24 |
| #####  | 1 | 19/24 |
| #####  | 1 | 19/24 |
| #####  | 1 | 21/24 |
| 967.71 | 3 | 31/68 |
| 964.35 | 2 | 30/68 |
| 937.58 | 3 | 30/68 |



##### 1 33/68  
##### 1 36/68  
##### 1 30/68  
##### 3 29/68  
844.35 1 20/34  
##### 1 21/34  
822.67 1 19/30  
##### 1 16/18  
831.40 2 15/18  
##### 1 16/18  
884.27 2 15/22  
836.44 2 15/22  
##### 1 17/22  
##### 1 20/26  
##### 1 21/26  
##### 1 14/18  
##### 1 15/18  
926.77 1 19/22  
937.86 1 19/22  
971.41 1 19/22  
902.33 1 19/22  
859.36 1 18/22  
933.50 1 19/22  
673.08 1 17/22  
722.03 1 18/22  
##### 1 29/56  
609.47 3 14/22  
706.33 3 15/22  
821.88 1 16/22  
##### 2 18/22  
##### 1 18/22  
##### 1 19/22  
##### 1 18/22  
737.51 1 21/36  
357.46 2 15/36  
641.41 1 20/36  
694.05 1 21/36  
##### 1 25/36  
##### 1 25/36  
##### 1 25/36  
884.11 1 22/36  
##### 1 25/36  
##### 1 25/36  
##### 1 25/36  
##### 1 25/36  
##### 1 39/72  
##### 1 25/36  
##### 1 38/72  
##### 1 26/36  
##### 1 38/72  
##### 1 24/36  
876.08 1 14/18  
954.15 1 15/20  
##### 1 17/20  
##### 1 17/20  
##### 1 16/20  
##### 1 20/26

|        |   |       |
|--------|---|-------|
| 680.43 | 2 | 17/22 |
| 606.06 | 1 | 16/22 |
| 704.01 | 1 | 17/22 |
| 876.41 | 1 | 18/22 |
| 804.28 | 1 | 18/22 |
| 801.71 | 1 | 18/22 |
| 718.32 | 1 | 17/22 |
| 751.08 | 1 | 18/22 |
| 796.36 | 1 | 18/22 |
| 631.09 | 1 | 16/22 |
| 863.33 | 1 | 16/22 |
| 612.41 | 1 | 15/22 |
| #####  | 1 | 19/22 |
| #####  | 1 | 19/22 |
| #####  | 1 | 20/22 |
| #####  | 1 | 18/20 |
| 932.19 | 1 | 17/20 |

**Sp      RSp Ion Count**

irical and theoretical spectra;  $\Delta$  CN, normalised difference of Xcorr values; Sp, preliminary score; RSp, .5 dpc female (pink) or 12.0 dpc female (red).





















































































































































































revised preliminary score. For further definitions of these terms, see TurboSequest product detail
